# Supplementary material for: RCN1 couple KIF14 and promotes the malignant progression of cervical cancer via the PI3K-mTOR pathway
Source: Research Square preprint supplement (doi:10.21203/rs.3.rs-6303169/v1), 2025-05-05
Supplement: Supplementary file 1 [file 283195634168f2bd4f659827.xlsx]

## Sheet: Proteins
Accession	Description	Exp. q-value: Combined	Sum PEP Score	Coverage [%]	# Peptides	# PSMs	# Unique Peptides	# AAs	MW [kDa]	calc. pI	Score CHIMERYS Identification: CHIMERYS Identification	# Peptides (by Search Engine): CHIMERYS Identification	# Razor Peptides	Abundance Ratio: (C33A) / (C93)	Abundance Ratio: (C33A) / (C-IgG)	Abundance Ratio Adj. P-Value: (C33A) / (C93)	Abundance Ratio Adj. P-Value: (C33A) / (C-IgG)	Abundance Ratio Variability [%]: (C33A) / (C93)	Abundance Ratio Variability [%]: (C33A) / (C-IgG)	Abundances (Grouped): C33A	Abundances (Grouped): C93	Abundances (Grouped): C-IgG	Abundances (Grouped) CV [%]: C33A	Abundances (Grouped) CV [%]: C93	Abundances (Grouped) CV [%]: C-IgG	Abundance: C33A_1	Abundance: C33A_2	Abundance: C33A_3	Abundance: C93_1	Abundance: C93_2	Abundance: C93_3	Abundance: C-IgG_1	Abundance: C-IgG_2	Abundance: C-IgG_3	Abundances (Normalized): C33A_1	Abundances (Normalized): C33A_2	Abundances (Normalized): C33A_3	Abundances (Normalized): C93_1	Abundances (Normalized): C93_2	Abundances (Normalized): C93_3	Abundances (Normalized): C-IgG_1	Abundances (Normalized): C-IgG_2	Abundances (Normalized): C-IgG_3	# Protein Groups	Modifications
P35579	Myosin-9 OS=Homo sapiens OX=9606 GN=MYH9 PE=1 SV=4	0	1858.92	75	232	23677	200	1960	226.4	5.6	10458.8	232	33	0.782	1.083	0.757066	0.929972	37.46	51.78	94.5	120.9	84.6	13.26	2.97	22.05	3.30639e+10	2.74577e+10	2.20009e+10	3.24826e+10	3.10925e+10	3.30111e+10	1.7473e+10	5.5265e+09	1.46075e+10	3.30639e+10	2.83859e+10	2.54506e+10	3.78378e+10	3.57211e+10	3.63315e+10	2.65994e+10	1.72498e+10	2.54152e+10	1
P35580	Myosin-10 OS=Homo sapiens OX=9606 GN=MYH10 PE=1 SV=3	0	800.407	63	141	6158	107	1976	228.9	5.54	2653.49	141	10	1.023	1.103	0.976582	0.908189	31.22	36.31	105.1	103	91.9	11.06	2.4	15.25	8.77896e+08	7.7817e+08	6.07473e+08	6.99396e+08	6.77111e+08	7.15987e+08	4.62101e+08	1.70962e+08	4.05787e+08	8.77896e+08	8.04478e+08	7.02725e+08	8.14701e+08	7.77909e+08	7.88004e+08	7.03462e+08	5.33622e+08	7.06017e+08	1
Q14204	Cytoplasmic dynein 1 heavy chain 1 OS=Homo sapiens OX=9606 GN=DYNC1H1 PE=1 SV=5	0	482.193	31	114	1842	114	4646	532.1	6.4	791.41	114	0	0.869	0.852	0.893112	0.836987	22.35	25.76	93.7	104.5	101.9	5.89	9.45	6.71	2.07198e+08	2.18511e+08	2.00868e+08	1.94072e+08	2.37926e+08	2.28867e+08	1.51674e+08	8.4574e+07	1.41189e+08	2.07198e+08	2.25898e+08	2.32364e+08	2.26068e+08	2.73345e+08	2.51887e+08	2.30895e+08	2.63979e+08	2.45651e+08	1
O00159	Unconventional myosin-Ic OS=Homo sapiens OX=9606 GN=MYO1C PE=1 SV=4	0	398.208	62	68	2526	67	1063	121.6	9.41	1131.7	68	0	1.219	1.097	0.946156	0.912016	30.73	43.34	111.7	88.1	100.2	4	11.65	10.81	1.26235e+09	1.26985e+09	1.04751e+09	8.5451e+08	1.03953e+09	8.81542e+08	7.44028e+08	3.09915e+08	6.88405e+08	1.26235e+09	1.31278e+09	1.21176e+09	9.95387e+08	1.19428e+09	9.70211e+08	1.13264e+09	9.67331e+08	1.19774e+09	1
O43795	Unconventional myosin-Ib OS=Homo sapiens OX=9606 GN=MYO1B PE=1 SV=3	0	335.129	53	65	3046	64	1136	131.9	9.38	1504.51	65	1	1.184	1.052	0.965964	0.956845	25.73	32.66	109.5	90.9	99.6	2.75	2.39	14.76	1.45833e+09	1.3967e+09	1.19654e+09	1.01779e+09	1.08012e+09	1.08936e+09	8.62214e+08	3.28162e+08	7.81956e+08	1.45833e+09	1.44392e+09	1.38416e+09	1.18559e+09	1.24091e+09	1.19894e+09	1.31256e+09	1.02429e+09	1.3605e+09	1
P78527	DNA-dependent protein kinase catalytic subunit OS=Homo sapiens OX=9606 GN=PRKDC PE=1 SV=3	0	328.234	24	79	1384	79	4128	468.8	7.12	643.68	79	0	1.045	0.952	0.990398	0.975723	21.75	25.39	101.9	98.1	100	4.6	0.83	3.51	1.85731e+08	1.83358e+08	1.75161e+08	1.55254e+08	1.60043e+08	1.65861e+08	1.19826e+08	6.25562e+07	1.07012e+08	1.85731e+08	1.89556e+08	2.02627e+08	1.80849e+08	1.83868e+08	1.82544e+08	1.82413e+08	1.95256e+08	1.86186e+08	1
Q00610	Clathrin heavy chain 1 OS=Homo sapiens OX=9606 GN=CLTC PE=1 SV=5	0	323.881	47	65	1285	65	1675	191.5	5.69	550.19	65	0	0.863	1.293	0.888573	0.431549	24.34	33.66	106.7	116.8	76.5	3.3	5.95	20.85	3.52674e+08	3.41996e+08	2.88128e+08	3.23744e+08	3.66953e+08	3.50844e+08	1.6626e+08	7.12136e+07	1.90265e+08	3.52674e+08	3.53558e+08	3.33306e+08	3.77117e+08	4.21579e+08	3.86133e+08	2.531e+08	2.22278e+08	3.31037e+08	1
P53621	Coatomer subunit alpha OS=Homo sapiens OX=9606 GN=COPA PE=1 SV=2	0	321.257	52	63	2091	63	1224	138.3	7.66	967.2	63	0	0.864	0.968	0.888573	0.989008	20.88	24.36	95.2	108.4	96.4	4.45	0.94	2.93	5.07373e+08	5.33398e+08	4.71175e+08	5.24204e+08	5.39749e+08	5.64453e+08	3.76572e+08	1.73446e+08	3.17076e+08	5.07373e+08	5.5143e+08	5.45056e+08	6.10626e+08	6.20099e+08	6.21228e+08	5.7326e+08	5.41375e+08	5.51671e+08	1
Q92616	Stalled ribosome sensor GCN1 OS=Homo sapiens OX=9606 GN=GCN1 PE=1 SV=7	0	315.567	34	74	1146	74	2671	292.5	7.43	472.93	74	0	0.808	0.992	0.820669	0.999235	21.09	19.03	91.2	121.2	87.6	10.39	4.77	4.19	9.27501e+07	1.09566e+08	8.53494e+07	1.10193e+08	1.22328e+08	1.19259e+08	5.79557e+07	3.03739e+07	5.46556e+07	9.27501e+07	1.1327e+08	9.87323e+07	1.28359e+08	1.40538e+08	1.31255e+08	8.82267e+07	9.48055e+07	9.50936e+07	1
Q9UM54	Unconventional myosin-VI OS=Homo sapiens OX=9606 GN=MYO6 PE=1 SV=4	0	275.056	45	57	1624	57	1294	149.6	8.53	785.69	57	0	1.099	1.087	0.994877	0.922318	26.06	35.07	104.4	93.5	102.1	5.06	5.57	27.82	4.87551e+08	4.44468e+08	3.81263e+08	3.40551e+08	3.58005e+08	4.01718e+08	2.99481e+08	8.47941e+07	2.58056e+08	4.87551e+08	4.59494e+08	4.41045e+08	3.96695e+08	4.11299e+08	4.42124e+08	4.55903e+08	2.64666e+08	4.48983e+08	1
Q14980	Nuclear mitotic apparatus protein 1 OS=Homo sapiens OX=9606 GN=NUMA1 PE=1 SV=2	0	274.45	33	63	928	63	2115	238.1	5.78	384.13	63	0	0.913	1.131	0.930685	0.865039	23.01	26.41	103.1	113.1	83.8	3.05	3.97	8.57	1.17779e+08	1.14946e+08	1.07707e+08	1.1332e+08	1.06637e+08	1.18526e+08	7.03077e+07	2.89689e+07	5.55184e+07	1.17779e+08	1.18832e+08	1.24595e+08	1.32002e+08	1.22512e+08	1.30447e+08	1.0703e+08	9.04202e+07	9.65948e+07	1
P60709	Actin, cytoplasmic 1 OS=Homo sapiens OX=9606 GN=ACTB PE=1 SV=1	0	255.414	70	28	3674	9	375	41.7	5.48	1826.02	28	25	0.844	0.965	0.867031	0.98575	32.81	31.55	88.3	112.6	99	1.72	2.95	13.53	8.39246e+09	8.33678e+09	7.21507e+09	9.35966e+09	8.95404e+09	9.72245e+09	6.40853e+09	2.40888e+09	5.40602e+09	8.39246e+09	8.61862e+09	8.3464e+09	1.09027e+10	1.0287e+10	1.07004e+10	9.75579e+09	7.51878e+09	9.40577e+09	1
P63261	Actin, cytoplasmic 2 OS=Homo sapiens OX=9606 GN=ACTG1 PE=1 SV=1	0	255.414	70	28	3674	9	375	41.8	5.48	1826.02	28	0	0.844	0.965	0.867031	0.98575	32.81	31.55	88.3	112.6	99	1.72	2.95	13.53	8.39246e+09	8.33678e+09	7.21507e+09	9.35966e+09	8.95404e+09	9.72245e+09	6.40853e+09	2.40888e+09	5.40602e+09	8.39246e+09	8.61862e+09	8.3464e+09	1.09027e+10	1.0287e+10	1.07004e+10	9.75579e+09	7.51878e+09	9.40577e+09	1
Q5JSZ5	Protein PRRC2B OS=Homo sapiens OX=9606 GN=PRRC2B PE=1 SV=2	0	249.557	31	52	794	51	2229	242.8	8.34	315.2	52	1	1.503	0.679	0.741693	0.134213	27.82	35.92	96.5	57.3	146.2	18.15	6.22	28.65	9.14686e+07	8.48051e+07	1.04457e+08	4.66798e+07	4.64806e+07	5.43797e+07	9.1045e+07	6.40956e+07	6.67651e+07	9.14686e+07	8.76721e+07	1.20836e+08	5.43755e+07	5.34e+07	5.98494e+07	1.38599e+08	2.0006e+08	1.16163e+08	1
P49327	Fatty acid synthase OS=Homo sapiens OX=9606 GN=FASN PE=1 SV=3	0	246.239	28	51	1127	51	2511	273.3	6.44	507.64	51	0	1.084	1.028	0.998872	0.975723	22.27	24.29	103.3	102.5	94.2	17.6	1.3	7.98	2.05852e+08	2.67071e+08	1.78455e+08	1.73387e+08	1.80439e+08	1.86225e+08	1.22948e+08	6.02966e+07	1.23498e+08	2.05852e+08	2.761e+08	2.06437e+08	2.01972e+08	2.073e+08	2.04956e+08	1.87166e+08	1.88203e+08	2.14871e+08	1
Q92614	Unconventional myosin-XVIIIa OS=Homo sapiens OX=9606 GN=MYO18A PE=1 SV=3	0	245.951	32	55	892	55	2054	233	6.3	355.48	55	0	0.802	0.862	0.80441	0.860198	33.01	35.78	79.8	89.3	130.9	18.57	11.34	17.92	7.66964e+07	9.83426e+07	9.63903e+07	8.55139e+07	9.89958e+07	1.1371e+08	9.01021e+07	6.31125e+07	9.58373e+07	7.66964e+07	1.01667e+08	1.11504e+08	9.9612e+07	1.13733e+08	1.25147e+08	1.37164e+08	1.96992e+08	1.66744e+08	1
Q14517	Protocadherin Fat 1 OS=Homo sapiens OX=9606 GN=FAT1 PE=1 SV=2	0	245.258	16	59	805	58	4588	506	5	293.98	59	1	0.717	0.782	0.628966	0.554544	28.64	28.62	76.7	107.6	115.7	12.71	10.17	12.06	6.60676e+07	6.59042e+07	7.16895e+07	7.10252e+07	8.31404e+07	9.19952e+07	6.75e+07	3.8437e+07	5.46077e+07	6.60676e+07	6.81322e+07	8.29305e+07	8.27346e+07	9.55171e+07	1.01248e+08	1.02756e+08	1.19973e+08	9.50102e+07	1
O94832	Unconventional myosin-Id OS=Homo sapiens OX=9606 GN=MYO1D PE=1 SV=2	0	244.397	49	51	1483	51	1006	116.1	9.39	703.59	51	0	1.335	0.997	0.896664	0.994006	21	30.21	112	80.9	107.1	2.4	3.82	13.85	3.83789e+08	3.65361e+08	3.164e+08	2.21608e+08	2.37323e+08	2.52671e+08	2.37252e+08	9.07211e+07	2.10713e+08	3.83789e+08	3.77712e+08	3.66012e+08	2.58143e+08	2.72652e+08	2.78086e+08	3.61171e+08	2.83166e+08	3.66614e+08	1
O95071	E3 ubiquitin-protein ligase UBR5 OS=Homo sapiens OX=9606 GN=UBR5 PE=1 SV=2	0	243.571	26	56	869	56	2799	309.2	5.85	360.06	56	0	1.191	4.126	0.965964	1.6177e-16	24.47	33.44	141	127.3	31.7	21.27	5.93	13.4	1.14834e+08	1.28962e+08	149796533	1.08612e+08	1.048e+08	102094415	2.04812e+07	7.70641e+06	1.72003e+07	1.14834e+08	1.33321e+08	1.73285e+08	1.26518e+08	1.20401e+08	1.12364e+08	3.11788e+07	2.40539e+07	2.99262e+07	1
Q9Y5S2	Serine/threonine-protein kinase MRCK beta OS=Homo sapiens OX=9606 GN=CDC42BPB PE=1 SV=2	0	228.535	32	50	1022	44	1711	194.2	6.37	446.32	50	5	0.965	1.04	0.960396	0.966179	16.95	22.19	103.5	105.1	91.5	2.3	3.82	6.7	1.40879e+08	1.42574e+08	1.23791e+08	1.24783e+08	1.27186e+08	1.23859e+08	8.31268e+07	3.69668e+07	7.5708e+07	1.40879e+08	1.47394e+08	1.43202e+08	1.45355e+08	1.46119e+08	1.36317e+08	1.26545e+08	1.15384e+08	1.31722e+08	1
Q15149	Plectin OS=Homo sapiens OX=9606 GN=PLEC PE=1 SV=3	0	228.172	17	66	606	63	4684	531.5	5.96	201.88	66	0	1.093	0.8	0.995287	0.626455	42.54	40.89	77.7	74.8	147.4	45.11	32.56	30.2	2.15893e+07	4.50674e+07	2.05988e+07	1.90405e+07	1.99722e+07	3.47251e+07	3.7774e+07	1.44807e+07	1.76327e+07	2.15893e+07	4.6591e+07	2.38287e+07	2.21796e+07	2.29454e+07	3.82179e+07	5.75039e+07	4.51985e+07	3.06786e+07	1
Q12965	Unconventional myosin-Ie OS=Homo sapiens OX=9606 GN=MYO1E PE=1 SV=2	0	223.949	44	46	1593	45	1108	127	8.92	774.48	46	0	0.949	1.063	0.942678	0.954745	22.98	30.56	94.4	104.3	101.3	5.05	4.57	24.86	5.2266e+08	4.6189e+08	4.16377e+08	4.51015e+08	4.6315e+08	5.19076e+08	3.49396e+08	1.04841e+08	2.96906e+08	5.2266e+08	4.77505e+08	4.81665e+08	5.25371e+08	5.32097e+08	5.71287e+08	5.3189e+08	3.27238e+08	5.16578e+08	1
P07900	Heat shock protein HSP 90-alpha OS=Homo sapiens OX=9606 GN=HSP90AA1 PE=1 SV=5	0	223.466	54	45	1588	30	732	84.6	5.02	714.49	45	13	1.007	0.986	0.967525	0.998547	35.36	37.27	100.8	93.4	105.8	18.92	4.61	7.52	3.65172e+08	5.18585e+08	3.9266e+08	3.61179e+08	3.66541e+08	4.1381e+08	2.8599e+08	1.62158e+08	2.74222e+08	3.65172e+08	5.36116e+08	4.54229e+08	4.20724e+08	4.21106e+08	4.55433e+08	4.35367e+08	5.06141e+08	4.77111e+08	1
Q13045	Protein flightless-1 homolog OS=Homo sapiens OX=9606 GN=FLII PE=1 SV=2	0	220.229	46	45	1072	45	1269	144.7	6.05	455.05	45	0	0.986	1.207	0.965964	0.68187	22.29	28.82	108.9	107.2	83.9	14.01	6.83	23.09	1.90109e+08	1.9735e+08	1.33455e+08	1.46502e+08	1.70104e+08	1.69946e+08	9.70298e+07	3.05031e+07	8.42117e+07	1.90109e+08	2.04022e+08	1.54381e+08	1.70654e+08	1.95426e+08	1.8704e+08	1.4771e+08	9.52089e+07	1.46517e+08	1
Q63HN8	E3 ubiquitin-protein ligase RNF213 OS=Homo sapiens OX=9606 GN=RNF213 PE=1 SV=3	0	214.743	14	55	524	55	5207	591	6.48	147.23	55	0	1.022	1.028	0.976582	0.970447	25.86	18.52	91.9	109.2	98.9	12.88	5.61	25.91	1.83892e+07	1.42612e+07	1.62428e+07	1.9795e+07	1.79385e+07	1.98691e+07	1.30102e+07	4.06178e+06	1.23195e+07	1.83892e+07	1.47433e+07	1.87897e+07	2.30585e+07	2.06089e+07	2.18676e+07	1.98056e+07	1.2678e+07	2.14344e+07	1
Q9NZM1	Myoferlin OS=Homo sapiens OX=9606 GN=MYOF PE=1 SV=1	0	212.291	29	50	892	50	2061	234.6	6.18	432.45	50	0	0.884	1.042	0.906843	0.963576	19.41	29.92	95.7	111.7	92.6	3.89	6.91	1.41	9.45992e+07	9.73153e+07	8.10112e+07	8.75868e+07	1.01995e+08	1.00336e+08	6.01311e+07	2.8661e+07	5.27575e+07	9.45992e+07	1.00605e+08	9.37139e+07	1.02027e+08	1.17178e+08	1.10428e+08	9.15384e+07	8.94591e+07	9.17912e+07	1
O15027	Protein transport protein Sec16A OS=Homo sapiens OX=9606 GN=SEC16A PE=1 SV=4	0	211.987	28	47	716	47	2357	251.7	5.8	300.29	47	0	1.511	0.641	0.73468	0.064136	22.64	30.57	94.1	65.1	140.8	15	5.14	35.37	9.88036e+07	9.54467e+07	1.09633e+08	5.86951e+07	5.48735e+07	6.31376e+07	9.71114e+07	8.22064e+07	8.17628e+07	9.88036e+07	9.86734e+07	1.26824e+08	6.83718e+07	6.30422e+07	6.94883e+07	1.47834e+08	2.56589e+08	1.42257e+08	1
Q9Y4I1	Unconventional myosin-Va OS=Homo sapiens OX=9606 GN=MYO5A PE=1 SV=2	0	203.27	28	47	980	43	1855	215.3	8.48	441.62	47	3	1.099	1.068	0.994877	0.948799	24.79	29.82	105	97	98	4.25	5.54	18.67	1.36186e+08	1.29609e+08	1.08554e+08	9.72145e+07	1.07768e+08	1.14174e+08	8.22067e+07	2.83765e+07	7.18479e+07	1.36186e+08	1.3399e+08	1.25575e+08	1.13242e+08	1.2381e+08	1.25658e+08	1.25144e+08	8.85712e+07	1.25006e+08	1
Q07157	Tight junction protein ZO-1 OS=Homo sapiens OX=9606 GN=TJP1 PE=1 SV=3	0	201.78	32	42	778	42	1748	195.3	6.7	346.75	42	0	1.952	0.766	0.262488	0.476956	26.92	38.72	111.5	49.3	139.2	19.96	14.9	31.58	1.19674e+08	1.15723e+08	1.43852e+08	4.54122e+07	4.25671e+07	5.88869e+07	9.81723e+07	7.85201e+07	8.29988e+07	1.19674e+08	1.19635e+08	1.66408e+08	5.2899e+07	4.89038e+07	6.481e+07	1.49449e+08	2.45083e+08	1.44407e+08	1
O00571	ATP-dependent RNA helicase DDX3X OS=Homo sapiens OX=9606 GN=DDX3X PE=1 SV=3	0	201.724	53	35	1850	34	662	73.2	7.18	909.05	35	1	1.166	0.742	0.965964	0.3553	20.98	34.99	94	86.3	119.6	11.7	4.44	26.28	7.67723e+08	7.5472e+08	8.14176e+08	5.71292e+08	6.28317e+08	6.51112e+08	6.25183e+08	4.78254e+08	5.70701e+08	7.67723e+08	7.80234e+08	9.41839e+08	6.65477e+08	7.21852e+08	7.16603e+08	9.51724e+08	1.49276e+09	9.92945e+08	1
P07437	Tubulin beta chain OS=Homo sapiens OX=9606 GN=TUBB PE=1 SV=2	0	201.513	64	24	2936	5	444	49.6	4.89	1272.31	24	24	1.109	0.696	0.992122	0.181106	30.51	29.68	87.2	91.4	121.4	5.39	2.19	26.72	2.49549e+09	2.40976e+09	2.36295e+09	2.2434e+09	2.28087e+09	2.28872e+09	2.01942e+09	1.60975e+09	1.99571e+09	2.49549e+09	2.49122e+09	2.73346e+09	2.61326e+09	2.62042e+09	2.51893e+09	3.07418e+09	5.02447e+09	3.47228e+09	1
P35908	Keratin, type II cytoskeletal 2 epidermal OS=Homo sapiens OX=9606 GN=KRT2 PE=1 SV=2	0	199.255	67	40	686	31	639	65.4	8	307.77	40	7	3.413	0.811	0.00071442	0.682055	102.2	62.68	130	31.7	138.4	52.5	23.37	59.34	1.79274e+08	1.01625e+08	2.68564e+08	2.45934e+07	3.80399e+07	4.10738e+07	9.28444e+07	1.34664e+08	1.09711e+08	1.79274e+08	1.05061e+08	3.10675e+08	2.86479e+07	4.37027e+07	4.52052e+07	1.41338e+08	4.20325e+08	1.90882e+08	1
P35749	Myosin-11 OS=Homo sapiens OX=9606 GN=MYH11 PE=1 SV=3	0	193.914	16	32	2627	5	1972	227.2	5.5	1275.47	32	0																															1
P04264	Keratin, type II cytoskeletal 1 OS=Homo sapiens OX=9606 GN=KRT1 PE=1 SV=6	0	187.832	44	35	762	30	644	66	8.12	355.55	35	2	6.647	0.859	2.73523e-09	0.860198	56.6	67.54	128.7	18.4	152.9	43.03	52.86	60.22	2.72076e+08	2.2794e+08	4.3476e+08	1.16619e+07	3.37724e+07	4.31013e+07	1.77262e+08	2.45806e+08	1.85793e+08	2.72076e+08	2.35646e+08	5.0293e+08	1.35845e+07	3.87999e+07	4.74366e+07	2.69848e+08	7.67231e+08	3.23256e+08	1
P68371	Tubulin beta-4B chain OS=Homo sapiens OX=9606 GN=TUBB4B PE=1 SV=1	0	187.624	58	22	2969	1	445	49.8	4.89	1357.25	22	2	1.183	0.742	0.965964	0.3553	16.87	26.15	100.1	79.6	120.3	8.44	4.05	24.4	7.16959e+08	7.90508e+08	7.29373e+08	5.3492e+08	5.88193e+08	590297894	6.15084e+08	4.57947e+08	5.64718e+08	7.16959e+08	8.17233e+08	8.4374e+08	6.23108e+08	6.75755e+08	6.49673e+08	9.36351e+08	1.42938e+09	9.82535e+08	1
O75643	U5 small nuclear ribonucleoprotein 200 kDa helicase OS=Homo sapiens OX=9606 GN=SNRNP200 PE=1 SV=2	0	186.513	26	45	721	45	2136	244.4	6.06	321.02	45	0	1.038	1.032	0.985529	0.972212	20.71	23.14	102.7	102	95.3	6.91	8	5.7	6.88543e+07	7.07995e+07	6.82928e+07	6.24129e+07	6.92426e+07	6.16713e+07	4.04768e+07	2.17715e+07	3.92569e+07	6.88543e+07	7.3193e+07	7.90011e+07	7.27024e+07	7.95505e+07	6.78745e+07	6.16184e+07	6.79552e+07	6.8302e+07	1
Q14152	Eukaryotic translation initiation factor 3 subunit A OS=Homo sapiens OX=9606 GN=EIF3A PE=1 SV=1	0	185.772	30	47	900	47	1382	166.5	6.79	418.14	47	0	0.876	1.41	0.901337	0.176323	28.13	38.46	99.1	130.1	70.8	17.44	7.86	25.19	1.46724e+08	1.38113e+08	1.67042e+08	1.65225e+08	1.68968e+08	1.52795e+08	6.88297e+07	4.84302e+07	5.52858e+07	1.46724e+08	1.42782e+08	1.93234e+08	1.92464e+08	1.94122e+08	1.68164e+08	1.0478e+08	1.51164e+08	9.61901e+07	1
P67936	Tropomyosin alpha-4 chain OS=Homo sapiens OX=9606 GN=TPM4 PE=1 SV=3	0	180.549	83	32	1691	18	248	28.5	4.69	830.7	32	13	0.801	1.145	0.803778	0.850254	31.5	56.68	91.7	119	89.3	7.39	2.21	25.77	9.49903e+08	8.38079e+08	7.10566e+08	9.6506e+08	9.69293e+08	1.05513e+09	5.6639e+08	1.67246e+08	4.85221e+08	9.49903e+08	8.66412e+08	8.21983e+08	1.12416e+09	1.11359e+09	1.16125e+09	8.62222e+08	5.22021e+08	8.44221e+08	1
P68133	Actin, alpha skeletal muscle OS=Homo sapiens OX=9606 GN=ACTA1 PE=1 SV=1	0	180.494	52	23	2477	7	377	42	5.39	1262.62	23	0	0.416	0.778	0.0146403	0.903222	44.47	33.43	56.4	185.7	57.9	33.12	22.24	19.64	490210	876299	503077	1.26306e+06	1.6682e+06	2.10479e+06	341190		394798	490210	905924	581960	1.47129e+06	1.91654e+06	2.3165e+06	519398		686898	1
O75165	DnaJ homolog subfamily C member 13 OS=Homo sapiens OX=9606 GN=DNAJC13 PE=1 SV=5	0	179.404	23	43	529	43	2243	254.3	6.74	194.67	43	0	1.148	1.068	0.970936	0.951502	24.6	28.78	108	102.2	89.9	2.87	7.29	8.56	5.11486e+07	4.86178e+07	4.59423e+07	4.15411e+07	3.72929e+07	4.45762e+07	2.44447e+07	1.4057e+07	2.44638e+07	5.11486e+07	5.02614e+07	5.31461e+07	4.83897e+07	4.28445e+07	4.90599e+07	3.72124e+07	4.38759e+07	4.25638e+07	1
P68032	Actin, alpha cardiac muscle 1 OS=Homo sapiens OX=9606 GN=ACTC1 PE=1 SV=1	0	178.337	46	22	2474	6	377	42	5.39	1261.97	22	0	0.416	0.778	0.0146403	0.903222	44.47	33.43	56.4	185.7	57.9	33.12	22.24	19.64	490210	876299	503077	1.26306e+06	1.6682e+06	2.10479e+06	341190		394798	490210	905924	581960	1.47129e+06	1.91654e+06	2.3165e+06	519398		686898	1
Q13885	Tubulin beta-2A chain OS=Homo sapiens OX=9606 GN=TUBB2A PE=1 SV=1	0	176.749	56	21	1909	1	445	49.9	4.89	827.32	21	2	0.694	0.797	0.555908	0.671067	12.73	22.24	82.2	113.8	104	22.99	6.76	31.58	1.0111e+07	1.47606e+07	1.37083e+07	1.8144e+07	2.04935e+07	18950613	1.14015e+07	9756170	1.10984e+07	1.0111e+07	1.52596e+07	1.58578e+07	2.11353e+07	2.35443e+07	2.08567e+07	1.73567e+07	3.04518e+07	1.93097e+07	1
Q9BVA1	Tubulin beta-2B chain OS=Homo sapiens OX=9606 GN=TUBB2B PE=1 SV=1	0	176.697	56	21	1958	1	445	49.9	4.89	848.23	21	0	1.265	0.637	0.930685	0.0695729	14.69	18.56	89.3	70.6	140.1	13.82	7.74	16.41	1.9355e+07	16639351	1.95514e+07	1.25654e+07	1.33211e+07	15434883	1.99472e+07	1.17697e+07	15287947	1.9355e+07	1.72019e+07	2.26171e+07	1.4637e+07	1.53042e+07	1.69874e+07	3.03659e+07	3.67365e+07	2.6599e+07	1
Q9P2E9	Ribosome-binding protein 1 OS=Homo sapiens OX=9606 GN=RRBP1 PE=1 SV=5	0	173.643	32	36	624	35	1410	152.4	8.6	283.47	36	1	1.337	0.988	0.893125	0.999477	23.78	21.06	109.3	79.8	110.9	4.17	9.81	3.47	1.34034e+08	1.36267e+08	1.25911e+08	9.51636e+07	7.92536e+07	9.34558e+07	9.38463e+07	4.32725e+07	8.27954e+07	1.34034e+08	1.40873e+08	1.45654e+08	1.10853e+08	9.10518e+07	1.02856e+08	1.42863e+08	1.35066e+08	1.44053e+08	1
P08238	Heat shock protein HSP 90-beta OS=Homo sapiens OX=9606 GN=HSP90AB1 PE=1 SV=4	0	173.64	39	35	1482	10	724	83.2	5.03	699.99	35	9	0.928	0.988	0.932471	0.999256	25.4	27.87	96.9	105.9	97.2	10.77	6.9	10.89	1.96136e+08	2.35607e+08	1.92899e+08	1.85564e+08	2.12887e+08	2.21555e+08	1.46035e+08	8.5855e+07	1.28679e+08	1.96136e+08	2.43572e+08	2.23145e+08	2.16157e+08	2.44579e+08	2.4384e+08	2.22311e+08	2.67978e+08	2.23885e+08	1
Q08211	ATP-dependent RNA helicase A OS=Homo sapiens OX=9606 GN=DHX9 PE=1 SV=4	0	171.15	33	36	1129	36	1270	140.9	6.84	538.51	36	0	1.223	0.939	0.943843	0.963363	20.12	27.16	111.1	84.8	104.1	8.82	3.48	16.02	2.62674e+08	2.78712e+08	2.71011e+08	1.95662e+08	1.91302e+08	1.93187e+08	1.73211e+08	1.1156e+08	1.55175e+08	2.62674e+08	2.88135e+08	3.13506e+08	2.2792e+08	2.1978e+08	2.12619e+08	2.63681e+08	3.48209e+08	2.69985e+08	1
Q5T4S7	E3 ubiquitin-protein ligase UBR4 OS=Homo sapiens OX=9606 GN=UBR4 PE=1 SV=1	0	170.502	11	43	492	43	5183	573.5	6.04	166.76	43	0	0.926	0.919	0.930685	0.954745	23.18	20.87	104.2	104.5	91.3	21.6	5.66	9.12	2.55112e+07	3.83943e+07	2.91018e+07	2.66053e+07	3.00824e+07	3.06887e+07	1.93734e+07	9.45846e+06	1.97869e+07	2.55112e+07	3.96923e+07	3.3665e+07	3.09916e+07	3.45606e+07	3.37754e+07	2.94924e+07	2.95225e+07	3.44266e+07	1
P27708	Multifunctional protein CAD OS=Homo sapiens OX=9606 GN=CAD PE=1 SV=3	0	169.403	23	37	514	37	2225	242.8	6.46	214.53	37	0	0.867	0.835	0.891092	0.77417	18.53	29.55	93.3	106.1	100.6	8.86	2.71	15.19	3.90275e+07	4.28697e+07	4.01789e+07	4.38055e+07	4.21606e+07	4.58071e+07	3.08923e+07	1.95583e+07	2.74554e+07	3.90275e+07	4.4319e+07	4.6479e+07	5.10273e+07	4.84368e+07	5.04146e+07	4.70277e+07	6.10469e+07	4.77688e+07	1
P11142	Heat shock cognate 71 kDa protein OS=Homo sapiens OX=9606 GN=HSPA8 PE=1 SV=1	0	169.273	54	32	1243	27	646	70.9	5.52	514.22	32	3	1.021	0.924	0.975662	0.954745	26.34	21.63	99.1	96.4	104.5	5.21	4.99	3.08	5.23003e+08	5.61371e+08	4.74982e+08	4.42706e+08	4.65438e+08	5.16835e+08	3.80739e+08	1.90843e+08	3.21892e+08	5.23003e+08	5.8035e+08	5.4946e+08	5.15692e+08	5.34725e+08	5.6882e+08	5.79604e+08	5.95674e+08	5.6005e+08	1
P49750	YLP motif-containing protein 1 OS=Homo sapiens OX=9606 GN=YLPM1 PE=1 SV=4	0	169.164	19	37	745	37	2146	241.5	6.55	369.35	37	0	0.875	0.542	0.901337	0.00280066	27.54	32.11	74.3	88.8	136.9	18.93	10.99	33.87	5.83049e+07	5.70614e+07	6.93501e+07	5.65733e+07	6.13427e+07	7.39916e+07	7.14092e+07	5.97608e+07	6.15198e+07	5.83049e+07	5.89905e+07	8.02242e+07	6.59001e+07	7.04744e+07	8.14339e+07	1.08707e+08	1.8653e+08	1.07036e+08	1
Q13509	Tubulin beta-3 chain OS=Homo sapiens OX=9606 GN=TUBB3 PE=1 SV=2	0	168.869	59	22	1912	7	450	50.4	4.93	848.27	22	1	0.692	0.793	0.550679	0.606163	23.43	25.19	81.9	129.1	88.9	5.1	5.45	22.91	1.58586e+08	1.69529e+08	1.42097e+08	2.22463e+08	2.35566e+08	2.20548e+08	1.06449e+08	7.89984e+07	1.02557e+08	1.58586e+08	1.7526e+08	1.64378e+08	2.59139e+08	2.70633e+08	2.42731e+08	1.62048e+08	2.46576e+08	1.78435e+08	1
P46940	Ras GTPase-activating-like protein IQGAP1 OS=Homo sapiens OX=9606 GN=IQGAP1 PE=1 SV=1	0	168.571	32	39	587	37	1657	189.1	6.48	271.34	39	2	1.606	0.824	0.639378	0.734766	22.12	31.2	106.7	63.2	130.1	13.99	13.13	12.16	7.91089e+07	8.68245e+07	9.03326e+07	45628963	5.30815e+07	4.26322e+07	7.18965e+07	3.95405e+07	5.5586e+07	7.91089e+07	8.97598e+07	1.04497e+08	5.31515e+07	6.09835e+07	4.69203e+07	1.09449e+08	1.23417e+08	9.67124e+07	1
Q6P2Q9	Pre-mRNA-processing-splicing factor 8 OS=Homo sapiens OX=9606 GN=PRPF8 PE=1 SV=2	0	168.316	22	48	587	48	2335	273.4	8.84	254.16	48	0	1.064	1.112	0.995287	0.901892	23.56	26.63	95.4	91.6	113	16.7	8.59	27.02	6.99755e+07	6.99593e+07	8.11044e+07	5.24604e+07	6.04037e+07	6.57002e+07	4.51154e+07	3.7426e+07	4.92159e+07	6.99755e+07	7.23244e+07	9.38216e+07	6.11092e+07	6.93957e+07	7.23086e+07	6.86797e+07	1.16817e+08	8.56292e+07	1
Q8N3C0	Activating signal cointegrator 1 complex subunit 3 OS=Homo sapiens OX=9606 GN=ASCC3 PE=1 SV=3	0	168.135	24	38	539	38	2202	251.3	7.09	199.89	38	0	1.12	1.095	0.985529	0.914773	20.36	22.62	123.4	91.5	85.1	16.71	2.35	16.01	31246673	3.82473e+07	3.78593e+07	2.46091e+07	2.55038e+07	2.72985e+07	1.79064e+07	8.44649e+06	2.00955e+07	31246673	3.95403e+07	4.37957e+07	2.86663e+07	2.93004e+07	3.00443e+07	2.72592e+07	2.63639e+07	3.49635e+07	1
P62736	Actin, aortic smooth muscle OS=Homo sapiens OX=9606 GN=ACTA2 PE=1 SV=1	0	167.272	43	21	2218	6	377	42	5.39	1170.36	21	0	0.416	0.778	0.0146403	0.903222	44.47	33.43	56.4	185.7	57.9	33.12	22.24	19.64	490210	876299	503077	1.26306e+06	1.6682e+06	2.10479e+06	341190		394798	490210	905924	581960	1.47129e+06	1.91654e+06	2.3165e+06	519398		686898	1
P36578	Large ribosomal subunit protein uL4 OS=Homo sapiens OX=9606 GN=RPL4 PE=1 SV=5	0	166.118	50	27	1567	27	427	47.7	11.06	670.99	27	0	1.355	1.154	0.886786	0.82354	26.86	24.94	114.5	87.6	97.8	2.63	9.79	7.79	1.14428e+09	1.0591e+09	9.44427e+08	7.8085e+08	7.29036e+08	6.7885e+08	6.59791e+08	2.75243e+08	5.37483e+08	1.14428e+09	1.0949e+09	1.09251e+09	9.09583e+08	8.37564e+08	7.47131e+08	1.00441e+09	8.59113e+08	9.35152e+08	1
Q14683	Structural maintenance of chromosomes protein 1A OS=Homo sapiens OX=9606 GN=SMC1A PE=1 SV=2	0	164.769	31	40	711	40	1233	143.1	7.64	324.58	40	0	1.162	0.933	0.965964	0.958055	18.15	23.81	108	81.5	110.5	7.11	11.54	4.51	8.61283e+07	8.93717e+07	8.58376e+07	5.98843e+07	5.79644e+07	7.49573e+07	6.21019e+07	3.14434e+07	5.15496e+07	8.61283e+07	9.23931e+07	9.92971e+07	6.9757e+07	6.65933e+07	8.24968e+07	9.45385e+07	9.81437e+07	8.96896e+07	1
P07951	Tropomyosin beta chain OS=Homo sapiens OX=9606 GN=TPM2 PE=1 SV=1	0	164.495	65	28	1355	12	284	32.8	4.7	664.16	28	4	0.674	1.173	0.493674	0.77417	30.06	33.39	89.8	129.1	81.1	13.86	8.93	33.03	9.98293e+07	8.295e+07	6.55253e+07	1.22376e+08	107248343	1.10812e+08	5.89171e+07	1.42885e+07	4.44812e+07	9.98293e+07	8.57543e+07	7.57998e+07	1.42551e+08	1.23214e+08	1.21957e+08	8.96903e+07	4.45984e+07	7.73915e+07	1
Q9NTJ3	Structural maintenance of chromosomes protein 4 OS=Homo sapiens OX=9606 GN=SMC4 PE=1 SV=2	0	164.056	26	37	517	37	1288	147.1	6.79	241.77	37	0	1.53	0.911	0.714477	0.939661	21.08	24.52	109.9	70.9	119.2	6.85	2.68	7.09	8.47875e+07	8.73621e+07	8.40263e+07	5.00439e+07	5.28106e+07	5.24132e+07	6.25423e+07	3.48314e+07	5.63238e+07	8.47875e+07	9.03156e+07	9.72017e+07	5.82943e+07	6.06722e+07	5.76852e+07	9.52089e+07	1.08719e+08	9.7996e+07	1
P04350	Tubulin beta-4A chain OS=Homo sapiens OX=9606 GN=TUBB4A PE=1 SV=2	0	160.783	53	20	2373	1	444	49.6	4.88	1008.44	20	2	0.821	1.034	0.84406	0.966179	45.44	34.04	92.4	123	84.6	10.66	11.03	12.69	1.88954e+07	2.11971e+07	1.54808e+07	21594803	1.94828e+07	2.53824e+07	1.34872e+07	5.54567e+06	9.26499e+06	1.88954e+07	2.19137e+07	1.79082e+07	2.5155e+07	2.23831e+07	2.79355e+07	2.05318e+07	1.73096e+07	1.61199e+07	1
P06396	Gelsolin OS=Homo sapiens OX=9606 GN=GSN PE=1 SV=1	0	160.51	39	25	902	25	782	85.6	6.28	406.62	25	0	0.553	1.138	0.156231	0.860198	24.12	28.56	78.2	149.1	72.7	13.74	7.74	21.41	3.27918e+08	2.62036e+08	2.1895e+08	5.03548e+08	4.45779e+08	4.69543e+08	1.80662e+08	5.72111e+07	1.44749e+08	3.27918e+08	2.70895e+08	2.53282e+08	5.86565e+08	5.1214e+08	5.16772e+08	2.75025e+08	1.78572e+08	2.51845e+08	1
Q9UPQ0	LIM and calponin homology domains-containing protein 1 OS=Homo sapiens OX=9606 GN=LIMCH1 PE=1 SV=4	0	159.048	37	36	684	36	1083	121.8	6.47	301.62	36	0	1.515	0.762	0.728329	0.455173	26.39	35.09	108.2	68	123.8	18.23	8.71	20.68	7.33337e+07	1.0237e+08	7.64513e+07	4.33709e+07	4.84074e+07	5.46717e+07	6.645e+07	4.49904e+07	5.66695e+07	7.33337e+07	1.05831e+08	8.8439e+07	5.05211e+07	5.56136e+07	6.01708e+07	1.01158e+08	1.40428e+08	9.85975e+07	1
O43852	Calumenin OS=Homo sapiens OX=9606 GN=CALU PE=1 SV=2	0	158.756	71	20	1514	20	315	37.1	4.64	693.2	20	0	1.012	0.532	0.968906	0.00190568	25.13	37.59	80	90.7	129.3	9.18	11.5	37.17	5.55859e+08	6.4072e+08	5.05069e+08	5.68694e+08	5.89244e+08	4.95353e+08	5.67759e+08	5.25911e+08	5.42775e+08	5.55859e+08	6.62381e+08	5.84264e+08	6.62451e+08	6.76962e+08	5.45178e+08	8.64307e+08	1.64152e+09	9.44358e+08	1
Q7L2E3	ATP-dependent RNA helicase DHX30 OS=Homo sapiens OX=9606 GN=DHX30 PE=1 SV=1	0	158.049	32	31	749	31	1194	133.9	8.78	370.67	31	0	1.371	1.054	0.877845	0.954745	17.76	19.74	111.9	79.3	108.8	5.67	6.49	15.31	1.26608e+08	1.34114e+08	1.21776e+08	8.42994e+07	8.18068e+07	9.69358e+07	88565552	5.39521e+07	7.30455e+07	1.26608e+08	1.38648e+08	1.40871e+08	9.81972e+07	9.3985e+07	1.06686e+08	1.34824e+08	1.684e+08	1.2709e+08	1
Q13813	Spectrin alpha chain, non-erythrocytic 1 OS=Homo sapiens OX=9606 GN=SPTAN1 PE=1 SV=3	0	155.728	20	41	289	41	2472	284.4	5.35	94.78	41	0	1.459	1.052	0.797641	0.954745	50.75	47.33	113.3	62.6	124.1	58.25	24.87	19.9	1.16835e+07	3.76763e+07	1.80092e+07	6.41846e+06	1.00213e+07	1.11947e+07	1.05105e+07	7.51402e+06	1.31106e+07	1.16835e+07	3.895e+07	2.08331e+07	7.47663e+06	1.15131e+07	1.23207e+07	1.60003e+07	2.34534e+07	2.28107e+07	1
P11717	Cation-independent mannose-6-phosphate receptor OS=Homo sapiens OX=9606 GN=IGF2R PE=1 SV=3	0	153.446	20	36	426	36	2491	274.2	5.94	162.65	36	0	0.646	1.078	0.412991	0.933246	27.09	27.88	90.1	134.2	75.7	8.05	1.96	15.5	2.64443e+07	2.9833e+07	2.38651e+07	3.61847e+07	3.58059e+07	3.68412e+07	1.79303e+07	6.41742e+06	1.33248e+07	2.64443e+07	3.08416e+07	2.76072e+07	4.21502e+07	4.11362e+07	4.05468e+07	2.72956e+07	2.00306e+07	2.31834e+07	1
P63267	Actin, gamma-enteric smooth muscle OS=Homo sapiens OX=9606 GN=ACTG2 PE=1 SV=1	0	153.252	40	19	2117	4	376	41.9	5.48	1150.75	19	0	1.025	100	0.990398	1.6177e-16	4.02		151.8	148.2			26.26			569840		493491	487167	791480					589105		574849	559689	871090				1
P13645	Keratin, type I cytoskeletal 10 OS=Homo sapiens OX=9606 GN=KRT10 PE=1 SV=6	0	152.778	41	28	839	24	584	58.8	5.21	419.85	28	4	6.144	0.749	1.58658e-08	0.389577	67.47	67.94	120.1	22.2	157.6	54.97	57.74	59.82	3.59511e+08	2.5393e+08	6.33333e+08	1.46485e+07	5.79043e+07	6.32413e+07	1.95918e+08	3.09177e+08	2.71094e+08	3.59511e+08	2.62514e+08	7.32641e+08	1.70635e+07	6.65243e+07	6.96024e+07	2.98248e+08	9.65027e+08	4.71668e+08	1
O15523	ATP-dependent RNA helicase DDX3Y OS=Homo sapiens OX=9606 GN=DDX3Y PE=1 SV=2	0	152.778	39	25	1226	24	660	73.1	7.55	622.61	25	0	1.162	0.733	0.965964	0.314439	20.61	32.31	93.1	84.7	122.3	13.07	3.39	22.57	5.4117e+08	5.36831e+08	5.89308e+08	4.18559e+08	4.39495e+08	4.74091e+08	4.79015e+08	3.35417e+08	4.11365e+08	5.4117e+08	5.5498e+08	6.81713e+08	4.87563e+08	5.04921e+08	5.21777e+08	7.2921e+08	1.04693e+09	7.15721e+08	1
P23458	Tyrosine-protein kinase JAK1 OS=Homo sapiens OX=9606 GN=JAK1 PE=1 SV=2	0	152.657	35	35	636	33	1154	133.2	7.55	270.17	35	2	0.896	1.033	0.916551	0.972212	21.22	26.74	95.8	112.5	91.7	6.88	3.49	22.35	8.14013e+07	7.21272e+07	6.15224e+07	7.13646e+07	7.62585e+07	8.07555e+07	5.22654e+07	1.61712e+07	4.10569e+07	8.14013e+07	7.45656e+07	7.11692e+07	8.313e+07	8.76107e+07	8.88783e+07	7.95642e+07	5.04748e+07	7.14337e+07	1
Q00839	Heterogeneous nuclear ribonucleoprotein U OS=Homo sapiens OX=9606 GN=HNRNPU PE=1 SV=6	0	151.419	37	28	703	28	825	90.5	6	343.05	28	0	0.95	0.825	0.942678	0.740317	27.21	25.34	92.2	107.9	99.9	6.91	8.42	17.42	2.73699e+08	2.30514e+08	2.2292e+08	2.73936e+08	2.62511e+08	2.45117e+08	1.83056e+08	1.19327e+08	1.6045e+08	2.73699e+08	2.38307e+08	2.57874e+08	3.19098e+08	3.0159e+08	2.69772e+08	2.78668e+08	3.72453e+08	2.79162e+08	1
O75369	Filamin-B OS=Homo sapiens OX=9606 GN=FLNB PE=1 SV=2	0	150.898	20	39	502	37	2602	278	5.73	170.42	39	1	0.909	1.081	0.930667	0.909671	32.65	30.21	91.4	110.6	98	29.08	7.42	15.59	1.89423e+07	3.19573e+07	1.98418e+07	2.12061e+07	2.41718e+07	25865063	1.26507e+07	8.39775e+06	1.41445e+07	1.89423e+07	3.30376e+07	2.29531e+07	2.47022e+07	2.77701e+07	2.84667e+07	1.92583e+07	2.62118e+07	2.46096e+07	1
Q9UQE7	Structural maintenance of chromosomes protein 3 OS=Homo sapiens OX=9606 GN=SMC3 PE=1 SV=2	0	148.951	26	33	635	33	1217	141.5	7.18	304.6	33	0	1.195	0.94	0.965964	0.964269	20.77	25.55	103.1	83	113.9	11.17	4.41	4.49	6.05062e+07	5.96659e+07	6.37011e+07	4.57412e+07	4.28322e+07	4.51023e+07	4.19021e+07	2.22918e+07	3.91701e+07	6.05062e+07	6.1683e+07	7.36896e+07	5.32822e+07	4.92085e+07	4.96389e+07	6.37881e+07	6.95791e+07	6.81509e+07	1
Q9NR30	Nucleolar RNA helicase 2 OS=Homo sapiens OX=9606 GN=DDX21 PE=1 SV=5	0	148.56	44	33	654	31	783	87.3	9.28	283.89	33	2	1.55	1.074	0.691861	0.942279	17.77	32.28	116.4	74.8	108.8	6.22	8.83	4.58	9.89366e+07	1.07453e+08	8.7506e+07	6.16237e+07	52436299	5.90644e+07	6.21505e+07	2.98455e+07	5.82954e+07	9.89366e+07	1.11086e+08	1.01227e+08	7.17832e+07	6.02422e+07	6.50054e+07	9.46126e+07	9.31563e+07	1.01426e+08	1
Q92841	Probable ATP-dependent RNA helicase DDX17 OS=Homo sapiens OX=9606 GN=DDX17 PE=1 SV=2	0	147.423	40	33	1512	23	729	80.2	8.27	727.41	33	9	1.133	1.125	0.9773	0.877463	26.35	25.15	112.5	94	93.5	10.5	1.71	7.8	5.07772e+08	5.70549e+08	5.4058e+08	4.142e+08	4.28645e+08	4.53532e+08	3.16712e+08	1.77667e+08	2.817e+08	5.07772e+08	5.89837e+08	6.25344e+08	4.82486e+08	4.92455e+08	4.99151e+08	4.82135e+08	5.54548e+08	4.90122e+08	1
P17844	Probable ATP-dependent RNA helicase DDX5 OS=Homo sapiens OX=9606 GN=DDX5 PE=1 SV=1	0	146.903	50	30	1572	20	614	69.1	8.92	807.19	30	0	1.365	1.04	0.877877	0.966179	22.87	20.85	115.1	81.1	103.8	8.39	1.05	12.09	2.35191e+08	2.55922e+08	2.40017e+08	1.57797e+08	1.62304e+08	1.70489e+08	1.56732e+08	9.3008e+07	1.35308e+08	2.35191e+08	2.64574e+08	2.77652e+08	1.83812e+08	1.86466e+08	1.87637e+08	2.38595e+08	2.90304e+08	2.35418e+08	1
O95347	Structural maintenance of chromosomes protein 2 OS=Homo sapiens OX=9606 GN=SMC2 PE=1 SV=2	0	142.942	29	32	542	32	1197	135.6	8.43	218.48	32	0	1.529	1.034	0.714477	0.970447	18.76	27.76	130.5	63.7	105.9	12.78	11.17	0.67	6.30847e+07	7.21365e+07	7.0532e+07	2.94054e+07	3.16654e+07	3.84952e+07	39744460	1.93472e+07	3.51451e+07	6.30847e+07	7.45752e+07	8.15915e+07	3.42533e+07	3.63792e+07	4.23672e+07	6.05035e+07	6.0388e+07	6.11479e+07	1
Q7Z406	Myosin-14 OS=Homo sapiens OX=9606 GN=MYH14 PE=1 SV=2	0	141.292	17	30	1593	17	1995	227.7	5.6	775.44	30	0	0.658	0.899	0.443466	0.980177	32.76	23.49	42.3	168.2	89.6	43.78	9.82	44.36	1.1924e+06	2.14506e+06	2.66799e+06	7.57298e+06	8.99431e+06	7.89986e+06	3.80688e+06	1505054	1.23636e+06	1.1924e+06	2.21758e+06	3.08634e+06	8.82149e+06	1.03332e+07	8.69446e+06	5.79526e+06	4.6977e+06	2.1511e+06	1
P13639	Elongation factor 2 OS=Homo sapiens OX=9606 GN=EEF2 PE=1 SV=4	0	141.105	44	29	652	29	858	95.3	6.83	303.24	29	0	1.024	1.047	0.976582	0.958844	25.1	27.19	103	106.2	90.8	17.12	3.95	7.41	127890476	1.70442e+08	1.20235e+08	1.18826e+08	1.30366e+08	1.30367e+08	8.0585e+07	3.69805e+07	7.68208e+07	127890476	1.76204e+08	1.39088e+08	1.38416e+08	1.49773e+08	1.4348e+08	1.22676e+08	1.15427e+08	1.33658e+08	1
Q6WCQ1	Myosin phosphatase Rho-interacting protein OS=Homo sapiens OX=9606 GN=MPRIP PE=1 SV=3	0	140.806	40	34	369	34	1025	116.5	6.21	155.16	34	0	2.141	0.878	0.137865	0.900469	30.23	33.2	115.7	35.3	149	27.48	10.28	11.93	2.71387e+07	4.12197e+07	2.35981e+07	6.29942e+06	7.85237e+06	7.56712e+06	2.0568e+07	1.27357e+07	20209857	2.71387e+07	4.26132e+07	2.72983e+07	7.33796e+06	9.02131e+06	8.32825e+06	3.13109e+07	3.97516e+07	3.51625e+07	1
P52701	DNA mismatch repair protein Msh6 OS=Homo sapiens OX=9606 GN=MSH6 PE=1 SV=2	0	140.697	24	30	705	30	1360	152.7	6.9	339.38	30	0	1.247	0.977	0.932471	0.993551	29.26	25.91	100.7	71	128.3	19.03	10.88	40.5	1.03152e+08	99235478	1.21858e+08	6.01246e+07	6.32855e+07	7.77017e+07	8.62645e+07	6.37179e+07	5.0026e+07	1.03152e+08	1.0259e+08	1.40966e+08	7.0037e+07	7.27066e+07	8.55173e+07	1.31321e+08	1.98882e+08	8.70388e+07	1
P68363	Tubulin alpha-1B chain OS=Homo sapiens OX=9606 GN=TUBA1B PE=1 SV=1	0	140.478	57	21	1438	1	451	50.1	5.06	735.95	21	22	0.978	0.74	0.965964	0.343817	27.15	28.65	91.6	93.2	115.3	6.21	4.21	13.42	1.21201e+09	1.24444e+09	1.18623e+09	1.05398e+09	1.13905e+09	1.20909e+09	1.05587e+09	6.47074e+08	930716223	1.21201e+09	1.28651e+09	1.37223e+09	1.22774e+09	1.30861e+09	1.3307e+09	1.60736e+09	2.0197e+09	1.61933e+09	1
Q92900	Regulator of nonsense transcripts 1 OS=Homo sapiens OX=9606 GN=UPF1 PE=1 SV=2	0	140.143	30	28	498	28	1129	124.3	6.61	225.44	28	0	1.881	0.99	0.327826	0.999684	19.58	23.94	118.8	55.8	125.4	16.35	12.89	15.34	5.79e+07	6.552e+07	6.94052e+07	2.19957e+07	2.85039e+07	2.89126e+07	4.38092e+07	2.84342e+07	4.10823e+07	5.79e+07	6.7735e+07	8.0288e+07	2.56219e+07	3.27471e+07	3.18208e+07	6.66913e+07	8.87512e+07	7.14779e+07	1
Q9C0C2	182 kDa tankyrase-1-binding protein OS=Homo sapiens OX=9606 GN=TNKS1BP1 PE=1 SV=4	0	139.896	22	29	392	29	1729	181.7	4.86	167.45	29	0	0.942	0.534	0.936613	0.00208319	31.89	35.43	92.4	77.7	129.9	9.94	10.84	25.49	3.44114e+07	4.0202e+07	3.5008e+07	2.56105e+07	3.22905e+07	3.09467e+07	35830415	2.70688e+07	3.27049e+07	3.44114e+07	4.15611e+07	4.04973e+07	2.98328e+07	3.70975e+07	3.40594e+07	5.45451e+07	8.44893e+07	5.69022e+07	1
Q01082	Spectrin beta chain, non-erythrocytic 1 OS=Homo sapiens OX=9606 GN=SPTBN1 PE=1 SV=2	0	139.84	18	35	345	35	2364	274.4	5.57	120.5	35	0	1.376	0.947	0.870653	0.970447	47.28	50.3	106.4	85.2	108.4	41.5	14.83	24.57	2.55099e+07	5.77597e+07	3.39016e+07	2.21243e+07	2.73592e+07	3.1586e+07	2.62604e+07	1.86953e+07	2.1924e+07	2.55099e+07	5.97124e+07	3.92174e+07	2.57718e+07	3.1432e+07	3.4763e+07	3.99766e+07	5.83533e+07	3.81449e+07	1
Q9ULV0	Unconventional myosin-Vb OS=Homo sapiens OX=9606 GN=MYO5B PE=1 SV=3	0	137.462	22	36	607	32	1848	213.5	7.2	271.55	36	0	1.088	1.105	0.997143	0.906925	29.91	24.96	116.8	95.5	87.7	21.59	4.53	19.01	3.26396e+07	3.51297e+07	2.02404e+07	2.38831e+07	2.32399e+07	2.30857e+07	1.88287e+07	6.2383e+06	1.40922e+07	3.26396e+07	3.63173e+07	2.34141e+07	2.78206e+07	2.66996e+07	2.54077e+07	2.86632e+07	1.94715e+07	2.45186e+07	1
O60716	Catenin delta-1 OS=Homo sapiens OX=9606 GN=CTNND1 PE=1 SV=1	0	136.956	32	26	1045	26	968	108.1	6.23	431.82	26	0	1.113	0.65	0.990398	0.0764475	28.48	29.93	78.5	78.5	143	29.68	9.28	25.97	1.06765e+08	121528353	1.6079e+08	1.07809e+08	1.21562e+08	1.05594e+08	1.40848e+08	1.08313e+08	1.31473e+08	1.06765e+08	1.25637e+08	1.86002e+08	1.25583e+08	1.39658e+08	1.16215e+08	2.14415e+08	3.38076e+08	2.28746e+08	1
O60506	Heterogeneous nuclear ribonucleoprotein Q OS=Homo sapiens OX=9606 GN=SYNCRIP PE=1 SV=2	0	136.221	43	27	809	18	623	69.6	8.59	355.71	27	8	0.961	0.769	0.954467	0.486274	25.18	36.11	82.3	104.5	113.2	14.1	16.13	32.06	1.395e+08	1.30002e+08	1.49609e+08	1.51949e+08	1.5925e+08	1.21974e+08	1.20318e+08	1.00913e+08	1.1026e+08	1.395e+08	1.34397e+08	1.73068e+08	1.77e+08	1.82957e+08	1.34242e+08	1.83161e+08	3.14978e+08	1.91838e+08	1
Q5VT25	Serine/threonine-protein kinase MRCK alpha OS=Homo sapiens OX=9606 GN=CDC42BPA PE=1 SV=1	0	136.171	23	33	378	28	1732	197.2	6.58	162.98	33	0	0.943	1.051	0.937082	0.954256	23.41	29.44	104.2	109.7	86.1	5.54	3.63	11.52	2.00498e+07	2.13786e+07	1.91106e+07	2.01564e+07	1.91005e+07	2.11334e+07	1.41038e+07	5.84712e+06	9.93775e+06	2.00498e+07	2.21013e+07	2.21072e+07	2.34794e+07	2.19439e+07	2.32591e+07	2.14705e+07	1.82505e+07	1.72904e+07	1
Q9BQE3	Tubulin alpha-1C chain OS=Homo sapiens OX=9606 GN=TUBA1C PE=1 SV=1	0	135.884	51	20	1414	2	449	49.9	5.1	727.61	20	0	1.086	0.804	0.997621	0.743562	33.43	27.22	102.8	82.7	114.5	13.05	24.72	28.15	1.14559e+07	1.39674e+07	1.25905e+07	7.84445e+06	13060489	1.05483e+07	1.05616e+07	8.01213e+06	8.93715e+06	1.14559e+07	1.44396e+07	1.45646e+07	9.13771e+06	1.50047e+07	1.16092e+07	1.60781e+07	2.50081e+07	1.55495e+07	1
O14578	Citron Rho-interacting kinase OS=Homo sapiens OX=9606 GN=CIT PE=1 SV=2	0	135.628	20	33	365	33	2027	231.3	6.57	142.96	33	0	3.631	2.903	0.000282243	8.38371e-10	39.48	41.33	207.2	40.7	52.2	16.84	10.73	16.67	6.33334e+07	6.01255e+07	7.17361e+07	9.00479e+06	1.12369e+07	1.12923e+07	1.03781e+07	6.70963e+06	9.16697e+06	6.33334e+07	6.21581e+07	8.29845e+07	1.04893e+07	1.29097e+07	1.24281e+07	1.57988e+07	2.09426e+07	1.59493e+07	1
P07814	Bifunctional glutamate/proline--tRNA ligase OS=Homo sapiens OX=9606 GN=EPRS1 PE=1 SV=5	0	134.086	25	29	502	29	1512	170.5	7.33	228.96	29	0	1.277	0.729	0.930685	0.29699	19.21	21.77	94.5	75.2	130.4	7.13	10.45	15.62	6.77494e+07	6.91766e+07	6.7393e+07	4.88505e+07	5.47732e+07	4.63613e+07	6.48518e+07	3.85496e+07	5.11423e+07	6.77494e+07	7.15152e+07	7.79603e+07	5.69041e+07	6.2927e+07	5.10245e+07	9.87248e+07	1.20324e+08	8.89809e+07	1
Q71U36	Tubulin alpha-1A chain OS=Homo sapiens OX=9606 GN=TUBA1A PE=1 SV=1	0	131.065	54	20	1375	1	451	50.1	5.06	702.62	20	0	0.986	0.729	0.965964	0.296542	26.73	26.08	91.6	92.7	115.7	6.33	4.41	13.69	1.19589e+09	1.22974e+09	1.17329e+09	1.03697e+09	1.11997e+09	1.19615e+09	1.04807e+09	6.44688e+08	9.22541e+08	1.19589e+09	1.27131e+09	1.35727e+09	1.20793e+09	1.28669e+09	1.31647e+09	1.59549e+09	2.01225e+09	1.6051e+09	1
O75533	Splicing factor 3B subunit 1 OS=Homo sapiens OX=9606 GN=SF3B1 PE=1 SV=3	0	129.96	30	28	384	28	1304	145.7	7.09	162.79	28	0	1.001	1.232	0.965964	0.611163	25.7	28.66	106.7	111.7	81.6	10.98	7.6	16.61	4.54268e+07	4.98842e+07	4.8982e+07	4.63472e+07	4.74222e+07	4.30734e+07	2.31357e+07	1.55603e+07	2.26692e+07	4.54268e+07	5.15706e+07	5.66625e+07	5.39882e+07	5.44817e+07	4.74059e+07	3.52197e+07	4.85681e+07	3.94414e+07	1
P21333	Filamin-A OS=Homo sapiens OX=9606 GN=FLNA PE=1 SV=4	0	129.716	15	32	383	30	2647	280.6	6.06	160.42	32	0	1	0.958	0.965964	0.992464	26.12	36.11	107	99.3	93.6	16.94	8.14	13.89	1.57023e+07	2.13794e+07	1.63213e+07	1.45996e+07	1.52482e+07	1.79681e+07	1.07634e+07	5292285	1.19274e+07	1.57023e+07	2.21022e+07	1.88805e+07	1.70065e+07	1.75181e+07	1.97754e+07	1.63853e+07	1.65187e+07	2.07521e+07	1
P05023	Sodium/potassium-transporting ATPase subunit alpha-1 OS=Homo sapiens OX=9606 GN=ATP1A1 PE=1 SV=1	0	129.345	33	31	876	20	1023	112.8	5.49	414.62	31	7	0.826	0.93	0.846334	0.954745	22.2	22.34	98.3	110.7	91	11.26	6.81	1.67	9.34971e+07	1.12909e+08	9.56357e+07	1.19474e+08	1.0743e+08	1.13168e+08	6.73005e+07	3.34158e+07	5.79861e+07	9.34971e+07	1.16726e+08	1.10631e+08	1.3917e+08	1.23422e+08	1.24551e+08	1.02452e+08	1.043e+08	1.00888e+08	1
Q14697	Neutral alpha-glucosidase AB OS=Homo sapiens OX=9606 GN=GANAB PE=1 SV=3	0	128.067	34	24	496	24	944	106.8	6.14	208.81	24	0	0.859	0.879	0.886786	0.90071	27.36	28.76	90.6	112.3	97.1	23.55	14.18	11.34	6.19567e+07	8.91761e+07	5.47438e+07	6.32616e+07	6.83658e+07	8.72223e+07	4.28389e+07	2.57347e+07	3.90189e+07	6.19567e+07	9.21909e+07	6.33277e+07	7.36911e+07	7.85431e+07	9.59955e+07	6.52141e+07	8.03253e+07	6.78878e+07	1
P29317	Ephrin type-A receptor 2 OS=Homo sapiens OX=9606 GN=EPHA2 PE=1 SV=2	0	127.89	33	26	893	25	976	108.2	6.23	419.2	26	1	0.855	1.035	0.881989	0.970447	26.93	27.43	100.2	107.8	91.9	3.92	5.35	11.44	2.07864e+08	2.00513e+08	1.67542e+08	1.89929e+08	1.94032e+08	2.21043e+08	1.42871e+08	5.56196e+07	1.09275e+08	2.07864e+08	2.07292e+08	1.93813e+08	2.21242e+08	2.22917e+08	2.43277e+08	2.17495e+08	1.73605e+08	1.90124e+08	1
Q01813	ATP-dependent 6-phosphofructokinase, platelet type OS=Homo sapiens OX=9606 GN=PFKP PE=1 SV=2	0	127.237	41	28	661	27	784	85.5	7.55	295.41	28	1	0.821	0.922	0.84406	0.954745	24.21	24.1	90.5	114.4	95.1	6.66	3.33	6.57	104313842	1.10992e+08	8.74397e+07	1.13121e+08	1.14687e+08	1.26767e+08	7.88812e+07	3.51127e+07	6.08786e+07	104313842	1.14744e+08	1.0115e+08	1.3177e+08	1.3176e+08	1.39518e+08	1.20082e+08	1.09597e+08	1.05921e+08	1
Q13501	Sequestosome-1 OS=Homo sapiens OX=9606 GN=SQSTM1 PE=1 SV=1	0	126.84	52	16	1174	16	440	47.7	5.22	415.13	16	0	1.249	1.049	0.932471	0.958055	23.51	35.56	108	90.4	101.7	10.17	2.01	4.37	1.03744e+09	1.15521e+09	8.51083e+08	7.45564e+08	7.32822e+08	7.94598e+08	6.41755e+08	3.0262e+08	5.91837e+08	1.03744e+09	1.19427e+09	9.84533e+08	8.6848e+08	8.41913e+08	8.74522e+08	9.76952e+08	9.44561e+08	1.02972e+09	1
Q92499	ATP-dependent RNA helicase DDX1 OS=Homo sapiens OX=9606 GN=DDX1 PE=1 SV=2	0	126.781	41	24	582	24	740	82.4	7.23	230.34	24	0	0.674	0.867	0.493674	0.868331	26.96	38.79	84.3	124.5	91.2	12.3	10.62	21.2	7.29829e+07	7.74583e+07	8.02875e+07	1.01483e+08	1.18431e+08	1.00793e+08	5.68696e+07	3.77322e+07	4.60974e+07	7.29829e+07	8.00769e+07	9.28767e+07	1.18214e+08	1.36061e+08	1.10931e+08	8.65733e+07	1.17773e+08	8.02035e+07	1
P02786	Transferrin receptor protein 1 OS=Homo sapiens OX=9606 GN=TFRC PE=1 SV=2	0	124.833	35	26	823	26	760	84.8	6.61	428.42	26	0	0.731	0.979	0.655018	0.994006	19.14	20.01	89.2	119.1	91.7	4.19	4.65	7.06	3.12228e+08	3.13456e+08	2.57625e+08	3.57964e+08	3.60361e+08	4.08668e+08	2.21932e+08	9.40234e+07	1.84511e+08	3.12228e+08	3.24053e+08	2.98021e+08	4.16979e+08	4.14006e+08	4.49773e+08	3.3785e+08	2.93474e+08	3.21026e+08	1
O95782	AP-2 complex subunit alpha-1 OS=Homo sapiens OX=9606 GN=AP2A1 PE=1 SV=3	0	123.679	36	28	632	22	977	107.5	7.03	307.84	28	5	1.047	1.235	0.990398	0.605657	24.02	29.35	113.7	98.7	87.6	9.91	5.6	23.15	1.00207e+08	1.15013e+08	1.03986e+08	8.86416e+07	9.78524e+07	9.20857e+07	6.0201e+07	2.03214e+07	5.84074e+07	1.00207e+08	1.18901e+08	1.20291e+08	1.03255e+08	1.12419e+08	1.01348e+08	9.16448e+07	6.34289e+07	1.01621e+08	1
P14625	Endoplasmin OS=Homo sapiens OX=9606 GN=HSP90B1 PE=1 SV=1	0	122.467	35	26	660	24	803	92.4	4.84	323.96	26	0	0.766	0.972	0.721334	0.992464	23.32	30.75	89.7	123.5	86.8	18.04	2.66	7.92	5.71761e+07	7.95191e+07	5.9535e+07	8.13367e+07	8.49082e+07	8.40465e+07	4.02465e+07	2.30052e+07	3.82876e+07	5.71761e+07	8.22074e+07	6.88701e+07	9.47461e+07	9.75481e+07	9.25002e+07	6.12677e+07	7.18056e+07	6.66154e+07	1
O95793	Double-stranded RNA-binding protein Staufen homolog 1 OS=Homo sapiens OX=9606 GN=STAU1 PE=1 SV=2	0	122.306	37	21	562	19	577	63.1	9.44	261.74	21	2	1.158	1.088	0.966249	0.922241	19.88	17.27	107.8	92	100.2	4.1	5.15	1.98	1.78156e+08	1.83103e+08	1.66684e+08	1.27585e+08	1.4072e+08	1.48604e+08	1.15579e+08	5.72026e+07	9.86613e+07	1.78156e+08	1.89294e+08	1.9282e+08	1.48619e+08	1.61668e+08	1.63551e+08	1.75948e+08	1.78546e+08	1.71658e+08	1
Q9GZR7	ATP-dependent RNA helicase DDX24 OS=Homo sapiens OX=9606 GN=DDX24 PE=1 SV=1	0	122.299	37	24	439	24	859	96.3	9.06	213.4	24	0	0.924	0.963	0.930685	0.983159	22.95	28.71	93.9	106.2	99.9	3.8	3.26	5.07	4.49678e+07	4.35048e+07	4.14946e+07	4.37428e+07	4.18653e+07	4.62298e+07	2.88943e+07	1.54769e+07	2.74848e+07	4.49678e+07	4.49755e+07	4.8001e+07	5.09544e+07	4.80976e+07	5.08798e+07	4.39862e+07	4.83079e+07	4.782e+07	1
P63010	AP-2 complex subunit beta OS=Homo sapiens OX=9606 GN=AP2B1 PE=1 SV=1	0	121.97	35	27	370	16	937	104.5	5.38	160.95	27	9	0.911	1.24	0.930685	0.590314	23.58	30.33	103.8	119.6	76.6	2.26	13.07	36.83	5.50015e+07	5.56024e+07	4.82251e+07	5.31091e+07	6.8194e+07	5.83729e+07	2.70527e+07	7.26423e+06	2.87933e+07	5.50015e+07	5.74821e+07	5.57869e+07	6.18648e+07	7.83458e+07	6.42443e+07	4.11827e+07	2.26737e+07	5.00967e+07	1
P23588	Eukaryotic translation initiation factor 4B OS=Homo sapiens OX=9606 GN=EIF4B PE=1 SV=2	0	119.737	41	24	475	24	611	69.1	5.73	184.98	24	0	1.332	1.04	0.899689	0.966179	41.41	49.16	108.1	93.1	98.9	23.51	13.03	27.02	5.92597e+07	6.29175e+07	7.86031e+07	4.89369e+07	4.87523e+07	4.05926e+07	3.90804e+07	2.82513e+07	3.12828e+07	5.92597e+07	6.50446e+07	9.09282e+07	5.70048e+07	5.60098e+07	4.46755e+07	5.94926e+07	8.81802e+07	5.4428e+07	1
Q9BUF5	Tubulin beta-6 chain OS=Homo sapiens OX=9606 GN=TUBB6 PE=1 SV=1	0	119.622	48	19	1170	6	446	49.8	4.88	570.25	19	0	0.711	0.718	0.606064	0.258347	18.24	26.94	55.3	194.2	50.5	52.86	7.85	18.26	9.32737e+07	3.94423e+07	3.43419e+07	1.22948e+08	1.30234e+08	1.16456e+08	2.44687e+07	1.09528e+07	2.76044e+07	9.32737e+07	4.07757e+07	3.97268e+07	1.43217e+08	1.49621e+08	1.28169e+08	3.72489e+07	3.41866e+07	4.8028e+07	1
Q99996	A-kinase anchor protein 9 OS=Homo sapiens OX=9606 GN=AKAP9 PE=1 SV=4	0	119.504	11	36	209	36	3907	452.7	4.98	58.2	36	0	1.22	0.632	0.944469	0.146471	32.55	52.68	72.9	70.6	156.4	31.33	23.48	36.45	3.95502e+06	5.08269e+06	6.38622e+06	2.82815e+06	4.50298e+06	4.62376e+06	7.40425e+06	5.98229e+06	5.54581e+06	3.95502e+06	5.25452e+06	7.38759e+06	3.2944e+06	5.17332e+06	5.08884e+06	1.12716e+07	1.86724e+07	9.64899e+06	1
Q9Y5X1	Sorting nexin-9 OS=Homo sapiens OX=9606 GN=SNX9 PE=1 SV=1	0	119.294	37	24	791	24	595	66.6	5.58	324.95	24	0	1.036	0.54	0.98381	0.00261551	30.2	47.9	82.3	76.5	141.3	17.04	8.58	34.36	1.01701e+08	1.09535e+08	1.21917e+08	8.11598e+07	9.15874e+07	1.02011e+08	1.27694e+08	104724098	1.04297e+08	1.01701e+08	1.13238e+08	1.41033e+08	9.45401e+07	1.05222e+08	1.12272e+08	1.94391e+08	3.26873e+08	1.81464e+08	1
P19474	E3 ubiquitin-protein ligase TRIM21 OS=Homo sapiens OX=9606 GN=TRIM21 PE=1 SV=1	0	118.952	51	25	925	25	475	54.1	6.38	430.56	25	0	0.698	0.271	0.565608	4.64905e-14	28.71	40.56	45.4	74.1	180.5	17.1	9.28	38.29	1.73965e+08	1.73933e+08	2.02958e+08	2.22786e+08	2.55221e+08	2.83847e+08	3.59512e+08	3.6585e+08	4.10414e+08	1.73965e+08	1.79813e+08	2.34781e+08	2.59515e+08	2.93214e+08	3.12397e+08	5.4729e+08	1.14192e+09	7.14068e+08	1
Q15154	Pericentriolar material 1 protein OS=Homo sapiens OX=9606 GN=PCM1 PE=1 SV=6	0	118.918	15	27	335	27	2024	228.4	5.02	118.24	27	0	1.175	0.741	0.965964	0.340635	26.93	24.74	94.7	72.8	132.5	14.39	4.95	14.2	1.93113e+07	2.29426e+07	22274372	1.6848e+07	1.58847e+07	1.6248e+07	2.18098e+07	1.14154e+07	1.54362e+07	1.93113e+07	2.37182e+07	2.5767e+07	1.96257e+07	1.82494e+07	1.78823e+07	3.32013e+07	3.56306e+07	2.6857e+07	1
P68366	Tubulin alpha-4A chain OS=Homo sapiens OX=9606 GN=TUBA4A PE=1 SV=1	0	117.536	45	18	1086	5	448	49.9	5.06	544.71	18	0	1.497	0.828	0.744652	0.865039	43.52	33.64	104.3	69.7	126	23.32	46.03	15.01	5.94258e+06	7.43561e+06	4.18322e+06	2.59859e+06	3.4548e+06	6.51883e+06	4716928	2.91032e+06	4.00924e+06	5.94258e+06	7.68699e+06	4.83915e+06	3.027e+06	3.9691e+06	7.17452e+06	7.18064e+06	9.08394e+06	6.97555e+06	1
P35527	Keratin, type I cytoskeletal 9 OS=Homo sapiens OX=9606 GN=KRT9 PE=1 SV=3	0	117.434	45	19	463	19	623	62	5.24	207.04	19	0	4.561	0.763	6.19508e-06	0.465785	90.72	52.5	127.9	37.8	134.3	28.04	13.06	38.07	2.25453e+08	1.88549e+08	2.83999e+08	5.35413e+07	5.79648e+07	7.2497e+07	1.48171e+08	1.3656e+08	1.36114e+08	2.25453e+08	1.94923e+08	3.28531e+08	6.23683e+07	6.65938e+07	7.97891e+07	2.25562e+08	4.26243e+08	2.36821e+08	1
P0DMV9	Heat shock 70 kDa protein 1B OS=Homo sapiens OX=9606 GN=HSPA1B PE=1 SV=1	0	116.203	49	24	680	14	641	70	5.66	308.32	24	4	1.08	0.977	0.999941	0.993551	21.01	28.25	104.5	92.3	103.2	6.22	1.7	8.56	1.3655e+08	1.42718e+08	1.12897e+08	1.05822e+08	1.03781e+08	1.09539e+08	8.45729e+07	4.8585e+07	7.75251e+07	1.3655e+08	1.47543e+08	1.30599e+08	1.23268e+08	1.19231e+08	1.20557e+08	1.28746e+08	1.51647e+08	1.34884e+08	1
Q02878	Large ribosomal subunit protein eL6 OS=Homo sapiens OX=9606 GN=RPL6 PE=1 SV=3	0	115.31	47	22	1203	22	288	32.7	10.58	643.5	22	0	1.302	1.072	0.912488	0.944903	15.75	22.06	109.7	86.1	104.2	0.94	4.59	8.36	1.12998e+09	1.07714e+09	9.79647e+08	7.61852e+08	7.14252e+08	8.09959e+08	7.28641e+08	3.02359e+08	6.17168e+08	1.12998e+09	1.11355e+09	1.13326e+09	8.87454e+08	8.2058e+08	8.91428e+08	1.10922e+09	9.43749e+08	1.07379e+09	1
P14618	Pyruvate kinase PKM OS=Homo sapiens OX=9606 GN=PKM PE=1 SV=4	0	113.397	42	20	641	20	531	57.9	7.84	276.59	20	0	0.897	0.972	0.917737	0.992464	29.76	32.91	91.3	115	93.7	20.66	3.69	10.31	1.50982e+08	2.07881e+08	1.33822e+08	1.71998e+08	1.62073e+08	1.77217e+08	1.04433e+08	6.00267e+07	8.97477e+07	1.50982e+08	2.14909e+08	1.54805e+08	2.00354e+08	1.862e+08	1.95042e+08	1.5898e+08	1.8736e+08	1.56149e+08	1
Q7Z6Z7	E3 ubiquitin-protein ligase HUWE1 OS=Homo sapiens OX=9606 GN=HUWE1 PE=1 SV=3	0	113.177	9	30	336	30	4374	481.6	5.22	113.73	30	0	0.888	0.957	0.908111	0.993551	25.5	23.64	103	104.9	92.1	11.15	4.91	5.26	13433203	16073103	1.39479e+07	1.45554e+07	1.33935e+07	1.4927e+07	9.77766e+06	4.30043e+06	8.2976e+06	13433203	1.66165e+07	1.6135e+07	1.6955e+07	1.53873e+07	1.64284e+07	1.48847e+07	1.34229e+07	1.44367e+07	1
Q9HCE1	Helicase MOV-10 OS=Homo sapiens OX=9606 GN=MOV10 PE=1 SV=2	0	112.981	31	25	550	25	1003	113.6	8.82	219.39	25	0	1.498	1.109	0.743897	0.903222	20.53	23.03	114	77	109	10.82	8.32	17.24	6.84241e+07	6.79116e+07	7.18129e+07	4.07366e+07	4.59606e+07	4.08095e+07	3.79678e+07	2.60589e+07	3.85787e+07	6.84241e+07	7.02075e+07	8.30732e+07	4.74526e+07	5.28025e+07	4.49143e+07	5.77989e+07	8.13373e+07	6.7122e+07	1
O75962	Triple functional domain protein OS=Homo sapiens OX=9606 GN=TRIO PE=1 SV=2	0	112.845	13	30	256	30	3097	346.7	6.37	91.48	30	0	1.364	1.08	0.877877	0.920599	24.22	32.93	121	77	102	14.6	4.38	13.64	1.93742e+07	2.36497e+07	2.23014e+07	1.33689e+07	1.41147e+07	1.34966e+07	1.35912e+07	5.16795e+06	1.18492e+07	1.93742e+07	2.44492e+07	2.57983e+07	1.5573e+07	1.62159e+07	1.48541e+07	2.069e+07	1.61306e+07	2.06161e+07	1
P09874	Poly [ADP-ribose] polymerase 1 OS=Homo sapiens OX=9606 GN=PARP1 PE=1 SV=4	0	112.688	29	25	390	25	1014	113	8.88	159.22	25	0	0.923	1.148	0.930685	0.839906	24.14	28.27	102.9	112.3	84.8	13.33	10.37	2.51	5.63841e+07	7.09044e+07	54209768	6.45969e+07	5.3175e+07	6.21842e+07	3.33758e+07	1.71024e+07	2.972e+07	5.63841e+07	7.33015e+07	6.27099e+07	7.52466e+07	6.10909e+07	6.84389e+07	5.08084e+07	5.33813e+07	5.17089e+07	1
Q9BQG0	Myb-binding protein 1A OS=Homo sapiens OX=9606 GN=MYBBP1A PE=1 SV=2	0	112.573	26	27	318	27	1328	148.8	9.28	131.92	27	0	1.133	0.983	0.9773	0.995855	19.62	22.97	103.1	98.7	98.3	5.28	12.21	11.35	2.49634e+07	2.64528e+07	2.16253e+07	1.81034e+07	2.34531e+07	2.17501e+07	1.33647e+07	7.63805e+06	1.46639e+07	2.49634e+07	2.73471e+07	2.50162e+07	2.10879e+07	2.69445e+07	2.39379e+07	2.03453e+07	2.38405e+07	2.55133e+07	1
Q92878	DNA repair protein RAD50 OS=Homo sapiens OX=9606 GN=RAD50 PE=1 SV=1	0	111.138	27	30	338	30	1312	153.8	6.89	129.2	30	0	0.958	0.829	0.950114	0.816504	28.57	26.26	90.4	98.3	111.4	9.43	4.6	21.82	1.24055e+07	1.00544e+07	1.05174e+07	1.13004e+07	1.24279e+07	1.20245e+07	9.84917e+06	5.68873e+06	6.52865e+06	1.24055e+07	1.03943e+07	1.21665e+07	1.31634e+07	1.4278e+07	1.3234e+07	1.49935e+07	1.77561e+07	1.1359e+07	1
Q15293	Reticulocalbin-1 OS=Homo sapiens OX=9606 GN=RCN1 PE=1 SV=1	0	110.975	66	19	666	19	331	38.9	5	317.24	19	0	1.457	3.933	0.798606	1.6177e-16	26.17	39.44	164.5	117.4	18.1	18.21	11.86	74.76	4.1765e+08	4.39368e+08	5.06515e+08	2.3525e+08	2.82095e+08	3.15422e+08	2.68121e+07	4.75538e+07	2.87764e+07	4.1765e+08	4.54221e+08	5.85938e+08	2.74034e+08	3.2409e+08	3.47148e+08	4.08164e+07	1.48429e+08	5.00672e+07	1
Q9Y446	Plakophilin-3 OS=Homo sapiens OX=9606 GN=PKP3 PE=1 SV=1	0	110.792	32	22	443	22	797	87	9.32	204.18	22	0	1.287	0.811	0.927979	0.679925	27.87	21.88	96.8	72.3	130.9	6.2	13.11	12.07	4.22487e+07	4.4467e+07	3.527e+07	2.5666e+07	2.74529e+07	3.46356e+07	3.75097e+07	1.83002e+07	2.6408e+07	4.22487e+07	4.59703e+07	4.08003e+07	2.98974e+07	3.15397e+07	3.81194e+07	5.71015e+07	5.71202e+07	4.59466e+07	1
P22314	Ubiquitin-like modifier-activating enzyme 1 OS=Homo sapiens OX=9606 GN=UBA1 PE=1 SV=3	0	110.738	29	23	438	23	1058	117.8	5.76	205.08	23	0	0.922	1.152	0.930685	0.827807	29.42	29.32	101.2	109	89.8	21.17	15.35	3.26	5.67837e+07	8.13879e+07	5.42761e+07	4.86803e+07	5.88766e+07	70267957	3.46006e+07	1.78846e+07	3.2013e+07	5.67837e+07	8.41393e+07	6.27867e+07	5.67059e+07	6.76413e+07	7.73358e+07	5.26729e+07	5.58229e+07	5.56985e+07	1
Q9NZB2	Constitutive coactivator of PPAR-gamma-like protein 1 OS=Homo sapiens OX=9606 GN=FAM120A PE=1 SV=2	0	110.244	27	25	458	24	1118	121.8	8.88	205.66	25	1	1.365	0.88	0.877877	0.90071	23.8	23.63	102.4	72.6	125	10.77	6.4	21.13	5.33905e+07	5.80278e+07	5.72999e+07	3.65209e+07	3.43144e+07	4.07142e+07	4.06733e+07	3.00313e+07	4.21058e+07	5.33905e+07	5.99896e+07	6.62846e+07	4.25418e+07	3.94226e+07	4.48094e+07	6.19175e+07	9.37361e+07	7.32586e+07	1
O43390	Heterogeneous nuclear ribonucleoprotein R OS=Homo sapiens OX=9606 GN=HNRNPR PE=1 SV=1	0	109.863	39	25	616	16	633	70.9	8.13	275.47	25	0	0.73	0.664	0.655018	0.099224	21.92	37.24	78.4	121.1	100.5	9.59	4.81	41.16	5.75186e+07	5.53983e+07	5.83336e+07	7.13775e+07	7.95354e+07	8.07776e+07	4.84597e+07	4.38144e+07	3.89967e+07	5.75186e+07	5.72711e+07	6.74804e+07	8.3145e+07	9.13754e+07	8.89025e+07	7.37708e+07	1.36757e+08	6.78492e+07	1
Q14247	Src substrate cortactin OS=Homo sapiens OX=9606 GN=CTTN PE=1 SV=2	0	109.644	34	22	1265	22	550	61.5	5.4	652.38	22	0	2.618	0.485	0.0210885	0.000185971	33.48	35.33	85.2	35.6	179.3	25.24	9.51	35.65	3.88339e+08	4.14441e+08	5.3078e+08	1.40957e+08	1.55803e+08	1.8029e+08	5.92547e+08	5.126e+08	5.16318e+08	3.88339e+08	4.28452e+08	6.14007e+08	1.64195e+08	1.78997e+08	1.98424e+08	9.02042e+08	1.59997e+09	8.98327e+08	1
P62424	Large ribosomal subunit protein eL8 OS=Homo sapiens OX=9606 GN=RPL7A PE=1 SV=2	0	109.106	52	18	1102	18	266	30	10.61	476.53	18	0	1.364	1.136	0.877877	0.860198	18.55	30.9	118.2	86.8	95	5.44	4.03	12.96	8.84918e+08	8.59834e+08	6.96668e+08	5.80119e+08	5.65536e+08	5.6637e+08	4.85163e+08	1.84303e+08	4.08883e+08	8.84918e+08	8.88903e+08	8.05906e+08	6.75759e+08	6.49725e+08	6.23338e+08	7.3857e+08	5.7526e+08	7.11404e+08	1
P19338	Nucleolin OS=Homo sapiens OX=9606 GN=NCL PE=1 SV=3	0	108.698	35	27	774	27	710	76.6	4.7	368.91	27	0	1.731	1.114	0.487944	0.90071	34.53	22	121.5	70.6	107.9	2.1	6.69	3.22	2.32022e+08	2.16202e+08	2.00285e+08	1.2165e+08	1.17164e+08	1.12646e+08	1.35192e+08	6.90392e+07	1.1647e+08	2.32022e+08	2.23512e+08	2.3169e+08	1.41706e+08	1.34605e+08	1.23977e+08	2.05804e+08	2.15491e+08	2.02642e+08	1
Q99613	Eukaryotic translation initiation factor 3 subunit C OS=Homo sapiens OX=9606 GN=EIF3C PE=1 SV=1	0	108.503	29	24	462	24	913	105.3	5.68	230.75	24	0	0.825	1.614	0.846334	0.0261273	23.88	26.21	105.1	133.3	61.6	16.53	7.28	16.99	1.04622e+08	1.0497e+08	1.21113e+08	1.18169e+08	1.29576e+08	1.16976e+08	3.87255e+07	2.5885e+07	3.65357e+07	1.04622e+08	1.08518e+08	1.40104e+08	1.3765e+08	1.48865e+08	1.28742e+08	5.89523e+07	8.07945e+07	6.35674e+07	1
Q7Z2W4	Zinc finger CCCH-type antiviral protein 1 OS=Homo sapiens OX=9606 GN=ZC3HAV1 PE=1 SV=3	0	107.722	34	24	473	23	902	101.4	8.4	199.48	24	0	1.121	0.967	0.985529	0.988913	16.79	22.68	103.4	91.1	105.5	2.01	0.8	4.44	5.34481e+07	5.28152e+07	4.80996e+07	4.14905e+07	4.14225e+07	4.37188e+07	3.62104e+07	1.9146e+07	3.2022e+07	5.34481e+07	5.46007e+07	5.56417e+07	4.83307e+07	4.75889e+07	4.81162e+07	5.51236e+07	5.97602e+07	5.57141e+07	1
P09493	Tropomyosin alpha-1 chain OS=Homo sapiens OX=9606 GN=TPM1 PE=1 SV=2	0	107.288	49	20	876	8	284	32.7	4.74	440.16	20	0	0.747	1.059	0.687522	0.954745	35.95	41.81	94.2	116.6	89.2	13.46	20.3	19.3	2.77251e+07	2.23701e+07	2.62062e+07	2.38981e+07	2.98594e+07	3.80762e+07	1.72366e+07	6.3514e+06	1.68613e+07	2.77251e+07	2.31264e+07	3.03154e+07	2.7838e+07	3.43044e+07	4.19061e+07	2.62395e+07	1.98245e+07	2.93365e+07	1
Q9Y520	Protein PRRC2C OS=Homo sapiens OX=9606 GN=PRRC2C PE=1 SV=4	0	106.918	11	27	304	27	2896	316.7	9.13	123.63	27	0	1.281	1.081	0.930667	0.929972	35.61	28.78	118.8	73.5	107.7	18.81	8.14	9.68	2.15523e+07	2.58094e+07	2.72778e+07	1.41742e+07	1.25626e+07	1.52771e+07	1.76251e+07	7.74601e+06	1.27162e+07	2.15523e+07	2.66819e+07	3.1555e+07	1.6511e+07	1.44327e+07	1.68138e+07	2.68309e+07	2.41775e+07	2.21245e+07	1
Q92974	Rho guanine nucleotide exchange factor 2 OS=Homo sapiens OX=9606 GN=ARHGEF2 PE=1 SV=4	0	106.79	30	25	394	25	986	111.5	7.27	171.1	25	0	1.057	1.005	0.994877	0.992464	24.8	24.28	103.5	95.4	101.1	3.15	3.56	9.59	4.58681e+07	4.70566e+07	4.00899e+07	3.84087e+07	36319402	3.88451e+07	2.97682e+07	1.56611e+07	2.31768e+07	4.58681e+07	4.86474e+07	4.6376e+07	4.47408e+07	4.17261e+07	4.27524e+07	4.53166e+07	4.88827e+07	4.03246e+07	1
P06733	Alpha-enolase OS=Homo sapiens OX=9606 GN=ENO1 PE=1 SV=2	0	106.741	56	21	397	21	434	47.1	7.39	141.35	21	0	0.959	0.951	0.952023	0.973489	38.38	47.8	105.4	109.2	85.4	29.67	8.96	12.92	1.14316e+08	1.27633e+08	6.13525e+07	1.09448e+08	9.26998e+07	1.07633e+08	5.829e+07	3.59855e+07	5.32348e+07	1.14316e+08	1.31948e+08	7.09727e+07	1.27492e+08	1.065e+08	1.18459e+08	8.87356e+07	1.12321e+08	9.26216e+07	1
P41252	Isoleucine--tRNA ligase, cytoplasmic OS=Homo sapiens OX=9606 GN=IARS1 PE=1 SV=2	0	106.428	23	24	479	24	1262	144.4	6.15	208.77	24	0	1.258	0.788	0.930685	0.582858	26.4	26.27	99.4	81.6	119.1	4.99	10.54	11.06	9.62117e+07	9.43834e+07	9.11429e+07	6.87285e+07	7.00255e+07	60373473	7.67757e+07	4.42245e+07	6.48202e+07	9.62117e+07	9.75742e+07	1.05434e+08	8.00593e+07	8.04499e+07	6.64461e+07	1.16877e+08	1.38037e+08	1.12779e+08	1
Q6R327	Rapamycin-insensitive companion of mTOR OS=Homo sapiens OX=9606 GN=RICTOR PE=1 SV=1	0	105.664	19	25	373	25	1708	192.1	7.47	153.46	25	0	1.008	1.014	0.967525	0.983159	19.43	23.54	103.9	104	92.1	5.85	4.39	6.69	2.43446e+07	2.45613e+07	2.36076e+07	2.04426e+07	2.25629e+07	2.30904e+07	1.47892e+07	6.48081e+06	1.31964e+07	2.43446e+07	2.53916e+07	2.73093e+07	2.38129e+07	2.59217e+07	2.5413e+07	2.25137e+07	2.02284e+07	2.296e+07	1
P62701	Small ribosomal subunit protein eS4, X isoform OS=Homo sapiens OX=9606 GN=RPS4X PE=1 SV=2	0	105.044	63	19	812	19	263	29.6	10.15	428.95	19	0	1.359	1.1	0.884665	0.908189	19.97	26.02	112.5	81.3	106.2	1.21	4.04	5.33	5.61364e+08	5.46342e+08	4.7695e+08	3.58316e+08	3.3535e+08	3.6877e+08	3.51119e+08	1.6988e+08	2.78649e+08	5.61364e+08	5.64812e+08	5.51736e+08	4.1739e+08	3.85272e+08	4.05862e+08	5.34512e+08	5.30244e+08	4.84814e+08	1
P12268	Inosine-5'-monophosphate dehydrogenase 2 OS=Homo sapiens OX=9606 GN=IMPDH2 PE=1 SV=2	0	105.021	42	17	661	15	514	55.8	6.9	321.73	17	2	1.503	0.943	0.741808	0.969162	18.65	22.15	112.3	70.8	116.9	6.66	12.14	4.15	2.08122e+08	2.29629e+08	197190198	1.36888e+08	1.08683e+08	1.30724e+08	1.56036e+08	7.86326e+07	1.29854e+08	2.08122e+08	2.37392e+08	2.2811e+08	1.59456e+08	1.24862e+08	1.43873e+08	2.37536e+08	2.45435e+08	2.25929e+08	1
Q9BXP5	Serrate RNA effector molecule homolog OS=Homo sapiens OX=9606 GN=SRRT PE=1 SV=1	0	104.148	25	23	453	23	876	100.6	5.96	205.64	23	0	1.079	0.627	0.999941	0.0455549	24.9	31.64	84.9	80.5	134.6	17.43	4.37	35.06	3.93032e+07	3.82994e+07	4.55465e+07	3.23768e+07	3.03351e+07	3.41027e+07	3.64605e+07	3.32023e+07	3.60981e+07	3.93032e+07	3.95941e+07	5.26883e+07	3.77145e+07	3.48509e+07	3.75329e+07	5.55042e+07	1.03634e+08	6.28061e+07	1
O43707	Alpha-actinin-4 OS=Homo sapiens OX=9606 GN=ACTN4 PE=1 SV=2	0	103.92	31	25	530	14	911	104.8	5.44	260.68	25	8	1.261	1.134	0.930685	0.860198	33.75	30.07	118.1	96.8	85.1	22.89	16.9	25.07	45786441	7.07885e+07	5.57388e+07	3.36024e+07	4.68581e+07	4.80367e+07	24410803	1.95935e+07	2.6697e+07	45786441	7.31817e+07	6.44788e+07	3.91422e+07	5.38337e+07	5.28685e+07	3.71609e+07	6.1157e+07	4.64494e+07	1
Q08J23	RNA cytosine C(5)-methyltransferase NSUN2 OS=Homo sapiens OX=9606 GN=NSUN2 PE=1 SV=2	0	103.828	36	22	362	22	767	86.4	6.77	153.6	22	0	1.681	0.973	0.550888	0.992464	18.47	32.67	117.7	68	114.2	15.32	18.45	19.54	3.27912e+07	3.90106e+07	2.60829e+07	2.06926e+07	1.47544e+07	1.72234e+07	2.0904e+07	1.38515e+07	1.77131e+07	3.27912e+07	4.03294e+07	3.01728e+07	2.41041e+07	1.69508e+07	1.89558e+07	3.18224e+07	4.32346e+07	3.08184e+07	1
Q96N67	Dedicator of cytokinesis protein 7 OS=Homo sapiens OX=9606 GN=DOCK7 PE=1 SV=4	0	103.684	14	27	337	27	2140	242.4	6.8	133.22	27	0	1.185	0.795	0.965964	0.613392	23.93	18.04	87.8	76.7	135.5	7.75	26.53	10.64	2.79461e+07	2.84294e+07	2.80828e+07	2.87744e+07	1.70779e+07	2.33239e+07	2.52883e+07	1.51748e+07	2.608e+07	2.79461e+07	2.93905e+07	3.24863e+07	3.35182e+07	1.96202e+07	2.567e+07	3.84968e+07	4.73648e+07	4.53757e+07	1
P06753	Tropomyosin alpha-3 chain OS=Homo sapiens OX=9606 GN=TPM3 PE=1 SV=2	0	103.425	44	19	1279	8	285	32.9	4.72	582.4	19	0	0.734	1.159	0.660244	0.812081	29.38	38.61	85.8	125.1	89.1	6.3	14.06	24	2.93963e+08	2.80056e+08	2.80532e+08	292260164	3.73068e+08	406256447	2.00534e+08	7.11231e+07	2.09135e+08	2.93963e+08	2.89523e+08	3.2452e+08	3.40443e+08	4.28605e+08	4.47119e+08	3.05275e+08	2.21995e+08	3.63867e+08	1
P0DPH8	Tubulin alpha-3D chain OS=Homo sapiens OX=9606 GN=TUBA3D PE=1 SV=1	0	103.04	40	15	1045	0	450	49.9	5.1	518.64	15	0	0.999	0.734	0.965964	0.320084	29.53	28.63	94.9	92.6	112.6	5.37	2.09	12.61	9.0436e+08	9.48346e+08	8.6715e+08	8.2092e+08	8.52086e+08	8.53275e+08	7.63456e+08	4.60198e+08	6.6842e+08	9.0436e+08	9.80406e+08	1.00312e+09	9.5626e+08	9.78932e+08	9.39101e+08	1.16222e+09	1.43641e+09	1.16296e+09	1
P42704	Leucine-rich PPR motif-containing protein, mitochondrial OS=Homo sapiens OX=9606 GN=LRPPRC PE=1 SV=3	0	102.161	21	25	282	25	1394	157.8	6.13	120.55	25	0	1.506	1.005	0.741219	0.992464	29.34	33.84	65.6	48.8	185.6	20.48	19.17	25.29	2.33267e+07	2.24021e+07	2.81738e+07	1.52488e+07	1.50786e+07	11186609	3.35575e+07	2.72572e+07	37904914	2.33267e+07	2.31594e+07	3.25915e+07	1.77627e+07	1.73233e+07	1.23118e+07	5.10849e+07	8.50776e+07	6.59496e+07	1
O43143	ATP-dependent RNA helicase DHX15 OS=Homo sapiens OX=9606 GN=DHX15 PE=1 SV=2	0	102.001	27	22	566	22	795	90.9	7.46	247.73	22	0	1.119	1.202	0.985529	0.698293	21.43	26.65	112.6	89.9	97.5	22.32	8.08	11.74	8.76116e+07	1.22238e+08	1.18746e+08	8.65754e+07	9.28357e+07	8.24846e+07	7.19099e+07	3.68032e+07	5.24683e+07	8.76116e+07	1.26371e+08	1.37365e+08	1.00848e+08	1.06656e+08	9.07812e+07	1.09469e+08	1.14873e+08	9.12881e+07	1
Q7KZF4	Staphylococcal nuclease domain-containing protein 1 OS=Homo sapiens OX=9606 GN=SND1 PE=1 SV=1	0	101.785	34	25	434	25	910	101.9	7.17	177.19	25	0	1.355	1.374	0.886786	0.239277	31.09	26.83	113.3	95.8	90.9	31.57	6.53	17	3.18067e+07	5.44038e+07	3.11573e+07	2.36676e+07	2.65213e+07	2.84061e+07	1.89884e+07	6.86297e+06	1.69992e+07	3.18067e+07	5.6243e+07	3.60428e+07	2.75695e+07	3.04694e+07	3.12634e+07	2.89064e+07	2.14213e+07	2.95764e+07	1
Q9Y6K5	2'-5'-oligoadenylate synthase 3 OS=Homo sapiens OX=9606 GN=OAS3 PE=1 SV=3	0	101.729	26	24	381	24	1087	121.1	8.4	153.51	24	0	0.646	1.215	0.413191	0.670596	21.1	20.55	92.2	128.8	79	7.5	2.28	12.76	3.57221e+07	3.83297e+07	3.58169e+07	4.75045e+07	4.98726e+07	4.98961e+07	2.24844e+07	8.67206e+06	1.94986e+07	3.57221e+07	3.96255e+07	4.14331e+07	5.53362e+07	5.72969e+07	5.49149e+07	3.42283e+07	2.7068e+07	3.39251e+07	1
P51114	RNA-binding protein FXR1 OS=Homo sapiens OX=9606 GN=FXR1 PE=1 SV=3	0	101.398	40	21	452	20	621	69.7	6.15	191.16	21	1	1.956	1.196	0.25794	0.711412	27.38	27.68	142.8	60.7	96.5	5.27	3.83	4.91	9.48362e+07	1.00731e+08	8.98835e+07	3.7924e+07	3.76004e+07	4.22723e+07	5.00901e+07	2.24085e+07	4.04053e+07	9.48362e+07	1.04136e+08	1.03977e+08	4.41763e+07	4.31978e+07	4.65242e+07	7.62527e+07	6.99432e+07	7.03e+07	1
O00267	Transcription elongation factor SPT5 OS=Homo sapiens OX=9606 GN=SUPT5H PE=1 SV=1	0	101.311	23	21	338	21	1087	120.9	5.06	128.33	21	0	0.853	0.561	0.877877	0.00595234	22.97	33.96	74.4	87.1	138.5	16.37	4.06	32.15	3.63878e+07	3.99008e+07	4.33382e+07	4.0377e+07	4.43137e+07	4.38808e+07	3.92444e+07	3.58666e+07	4.41076e+07	3.63878e+07	4.12497e+07	5.01337e+07	4.70336e+07	5.09104e+07	4.82946e+07	5.97422e+07	1.1195e+08	7.67415e+07	1
Q96KG9	N-terminal kinase-like protein OS=Homo sapiens OX=9606 GN=SCYL1 PE=1 SV=1	0	101.158	34	19	438	19	808	89.6	6.3	197.41	19	0	1.291	0.635	0.925757	0.0554515	29.23	46.2	90.1	70.3	139.7	13.72	8.36	24.46	79098524	8.10318e+07	88191925	5.15017e+07	5.69075e+07	6.44493e+07	7.82107e+07	5.92948e+07	7.46772e+07	79098524	8.37712e+07	1.02021e+08	5.99925e+07	6.5379e+07	7.09318e+07	1.19061e+08	1.85076e+08	1.29929e+08	1
Q13435	Splicing factor 3B subunit 2 OS=Homo sapiens OX=9606 GN=SF3B2 PE=1 SV=2	0	101.076	26	20	304	20	895	100.2	5.67	116.16	20	0	1.411	1.101	0.846334	0.908189	21.11	21.52	116.7	83.7	99.6	11.05	9.61	6.34	3.1216e+07	3.40861e+07	33696349	2.24288e+07	1.88984e+07	2.29642e+07	1.95567e+07	1.06737e+07	1.72756e+07	3.1216e+07	3.52384e+07	3.898e+07	2.61265e+07	2.17117e+07	2.52741e+07	2.97714e+07	3.33156e+07	3.00573e+07	1
O95239	Chromosome-associated kinesin KIF4A OS=Homo sapiens OX=9606 GN=KIF4A PE=1 SV=3	0	101.074	25	25	334	15	1232	139.8	6.27	137.19	25	3	1.919	0.598	0.289864	0.0206168	23.85	29.11	99.4	33.9	166.7	22.98	11.53	30	1.98169e+07	2.48035e+07	2.734e+07	6.95413e+06	8.81841e+06	7.95125e+06	2.43467e+07	2.06785e+07	2.47122e+07	1.98169e+07	2.56421e+07	3.1627e+07	8.10061e+06	1.01312e+07	8.75102e+06	3.70632e+07	6.45435e+07	4.2996e+07	1
Q92620	Pre-mRNA-splicing factor ATP-dependent RNA helicase PRP16 OS=Homo sapiens OX=9606 GN=DHX38 PE=1 SV=2	0	100.632	20	21	303	21	1227	140.4	6.54	134.59	21	0	1.078	0.599	0.999941	0.0209065	26.58	26.94	84.5	87.6	127.9	16.93	9.23	28.6	2.32124e+07	2.1531e+07	2.59972e+07	1.88096e+07	2.29448e+07	2.18827e+07	2.30893e+07	17824357	1.99391e+07	2.32124e+07	2.22589e+07	3.00736e+07	2.19106e+07	2.63605e+07	2.40837e+07	3.51491e+07	5.56349e+07	3.46915e+07	1
P16615	Sarcoplasmic/endoplasmic reticulum calcium ATPase 2 OS=Homo sapiens OX=9606 GN=ATP2A2 PE=1 SV=1	0	100.584	25	21	452	21	1042	114.7	5.34	204.77	21	0	0.702	1.017	0.57997	0.983159	25.38	24.2	86.5	125.5	88	1.16	4.37	3.97	7.45718e+07	7.32862e+07	6.59446e+07	8.86425e+07	9.56656e+07	1.02173e+08	5.0593e+07	2.64221e+07	4.43062e+07	7.45718e+07	7.57638e+07	7.62848e+07	1.03256e+08	1.09907e+08	1.1245e+08	7.70183e+07	8.24708e+07	7.7087e+07	1
Q93008	Probable ubiquitin carboxyl-terminal hydrolase FAF-X OS=Homo sapiens OX=9606 GN=USP9X PE=1 SV=4	0	99.155	12	25	297	15	2554	290.3	5.8	120.13	25	6	0.774	0.861	0.741693	0.903222	20.18	22.75	90.7	103.2	106.1	12.26	1.82	3.81	1.10534e+07	1.12837e+07	12012508	1.13092e+07	1.18664e+07	1.20552e+07	8642900	4.36958e+06	8.16052e+06	1.10534e+07	1.16652e+07	1.38961e+07	1.31737e+07	1.36329e+07	1.32677e+07	1.31572e+07	1.36387e+07	1.41982e+07	1
Q6PKG0	La-related protein 1 OS=Homo sapiens OX=9606 GN=LARP1 PE=1 SV=2	0	99.04	27	22	438	22	1096	123.4	8.82	188.44	22	0	1.119	0.904	0.985529	0.929972	21	20.36	102.7	91.2	106.1	5.94	4.94	7.91	6.21837e+07	63692558	6.05265e+07	5.15516e+07	5.08628e+07	4.95338e+07	42454701	2.41417e+07	3.9087e+07	6.21837e+07	6.58458e+07	7.00171e+07	6.00506e+07	5.84346e+07	5.45161e+07	6.46293e+07	7.53532e+07	6.80063e+07	1
P49411	Elongation factor Tu, mitochondrial OS=Homo sapiens OX=9606 GN=TUFM PE=1 SV=3	0	98.612	47	17	466	17	455	49.8	7.61	224.1	17	0	1.083	0.845	0.998872	0.814489	24.72	30.74	102.4	85.3	112.2	5.6	5.16	12.52	1.42309e+08	1.38993e+08	1.12047e+08	9.69665e+07	1.03196e+08	1.13763e+08	9.7261e+07	5.98519e+07	89626214	1.42309e+08	1.43692e+08	1.29616e+08	1.12953e+08	1.18559e+08	1.25205e+08	1.48062e+08	1.86815e+08	1.55938e+08	1
Q6S8J3	POTE ankyrin domain family member E OS=Homo sapiens OX=9606 GN=POTEE PE=2 SV=3	0	98.536	10	9	1769	0	1075	121.3	6.2	838.24	9	0																															0
Q07065	Cytoskeleton-associated protein 4 OS=Homo sapiens OX=9606 GN=CKAP4 PE=1 SV=2	0	98.463	46	21	588	21	602	66	5.92	273.53	21	0	0.76	0.936	0.714477	0.960721	15.71	14.65	87.9	120.2	91.9	4.45	1.8	8.84	8.19479e+07	8.45174e+07	7.72407e+07	1.02526e+08	1.05567e+08	1.06309e+08	6.84266e+07	2.92615e+07	5.08436e+07	8.19479e+07	8.73747e+07	8.93521e+07	1.19428e+08	1.21283e+08	1.17002e+08	1.04167e+08	9.13335e+07	8.84612e+07	1
Q00341	Vigilin OS=Homo sapiens OX=9606 GN=HDLBP PE=1 SV=3	0	97.865	23	23	432	23	1268	141.4	6.87	170.92	23	0	1.347	0.89	0.888573	0.908651	23.64	24.48	122.4	71.8	105.8	14.59	9.45	14.66	3.6404e+07	46410635	4.0493e+07	2.36033e+07	2.58627e+07	2.23297e+07	2.58767e+07	1.6329e+07	2.32607e+07	3.6404e+07	4.79796e+07	4.68423e+07	2.74947e+07	2.97128e+07	2.45757e+07	3.93924e+07	5.09674e+07	4.04706e+07	1
O94964	Microtubule cross-linking factor 2 OS=Homo sapiens OX=9606 GN=MTCL2 PE=1 SV=3	0	97.654	19	25	236	23	1661	183.7	6.52	76.24	25	1	1.306	0.909	0.908959	0.954745	28.59	25.4	62.4	19.9	217.7	3.06	40.26	65.06	8.02217e+06	7.30406e+06	6.79017e+06	1.76165e+06	3.74102e+06	2274099	1.82795e+07	1.59995e+06	1.57437e+07	8.02217e+06	7.55099e+06	7.85488e+06	2.05209e+06	4.29793e+06	2.50284e+06	2.78272e+07	4.99389e+06	2.7392e+07	1
Q07666	KH domain-containing, RNA-binding, signal transduction-associated protein 1 OS=Homo sapiens OX=9606 GN=KHDRBS1 PE=1 SV=1	0	97.168	30	16	1131	13	443	48.2	8.66	646.1	16	2	1.007	0.5	0.967525	0.000422748	39.56	42.34	75.1	73.3	151.6	20.61	4.79	40.31	4.3503e+08	4.45607e+08	5.42659e+08	3.86026e+08	3.88908e+08	4.41958e+08	5.89649e+08	5.59026e+08	5.34653e+08	4.3503e+08	4.60671e+08	6.27748e+08	4.49667e+08	4.46803e+08	4.86413e+08	8.9763e+08	1.74488e+09	9.30227e+08	1
P43243	Matrin-3 OS=Homo sapiens OX=9606 GN=MATR3 PE=1 SV=2	0	97.145	30	21	422	21	847	94.6	6.25	196.95	21	0	0.624	1.018	0.343237	0.983159	18.82	27.82	81.2	135.7	83.1	15.14	5.67	22.15	3.34288e+07	3.46174e+07	38312039	4.88092e+07	5.2028e+07	5.78258e+07	2.22543e+07	1.61902e+07	2.1036e+07	3.34288e+07	3.57876e+07	4.43194e+07	5.6856e+07	5.97732e+07	6.36421e+07	3.38779e+07	5.05342e+07	3.65999e+07	1
Q14764	Major vault protein OS=Homo sapiens OX=9606 GN=MVP PE=1 SV=4	0	97.132	31	20	351	20	893	99.3	5.48	142.84	20	0	0.557	0.629	0.16384	0.0586777	30.96	47.8	76.6	137.3	86.1	9.45	6.68	24.1	2.11448e+07	2.02683e+07	1.53749e+07	3.22461e+07	3.26975e+07	30326287	1.54848e+07	1.07426e+07	1.25106e+07	2.11448e+07	2.09535e+07	1.77857e+07	3.75623e+07	3.7565e+07	3.33766e+07	2.35726e+07	3.35306e+07	2.17669e+07	1
P11021	Endoplasmic reticulum chaperone BiP OS=Homo sapiens OX=9606 GN=HSPA5 PE=1 SV=2	0	97.015	34	21	468	19	654	72.3	5.16	186.17	21	0	0.878	0.994	0.905382	0.997207	18.43	27.91	100.3	105.5	94.2	7.69	4.11	17.86	3.50967e+07	3.93858e+07	34149136	3.4996e+07	3.61529e+07	4.00446e+07	21865402	1.50036e+07	2.13354e+07	3.50967e+07	4.07173e+07	3.95038e+07	4.07655e+07	4.15348e+07	4.40724e+07	3.3286e+07	4.68304e+07	3.71208e+07	1
Q2M1P5	Kinesin-like protein KIF7 OS=Homo sapiens OX=9606 GN=KIF7 PE=1 SV=2	0	96.829	25	25	353	24	1343	150.5	6.79	131.14	25	0	1.089	0.781	0.99661	0.656409	21.05	22.5	91.3	89	119.7	30.13	17.51	15.07	8.54361e+06	6.57955e+06	1.05687e+07	5.26402e+06	7.46201e+06	7.56607e+06	7.18144e+06	4.55481e+06	6.43301e+06	8.54361e+06	6.80198e+06	1.22259e+07	6.13187e+06	8.57285e+06	8.32709e+06	1.09324e+07	1.42168e+07	1.11926e+07	1
Q04637	Eukaryotic translation initiation factor 4 gamma 1 OS=Homo sapiens OX=9606 GN=EIF4G1 PE=1 SV=4	0	96.705	17	23	340	22	1599	175.4	5.33	155.03	23	1	1.95	0.964	0.263154	0.983877	23.14	26.33	125.1	50	125	15.28	11.62	23.34	3.32695e+07	3.74904e+07	3.90721e+07	1.32446e+07	1.34784e+07	1.70736e+07	2.38587e+07	1.75902e+07	2.22551e+07	3.32695e+07	3.87579e+07	4.51986e+07	1.54282e+07	1.54848e+07	1.87909e+07	3.63203e+07	5.49039e+07	3.8721e+07	1
Q9BYK8	3'-5' exoribonuclease HELZ2 OS=Homo sapiens OX=9606 GN=HELZ2 PE=1 SV=7	0	96.232	11	29	259	29	2896	322.1	8	75.74	29	0	0.845	1.059	0.893112	0.93899	17.07	12.47	123	93.3	83.7	86.64	45.44	34.1	82157.5	940929	1.40215e+06	575537	642359	1.31967e+06	242884	212106	438038	82157.5	972739	1.622e+06	670421	737984	1.45241e+06	369746	662042	762129	1
Q13459	Unconventional myosin-IXb OS=Homo sapiens OX=9606 GN=MYO9B PE=1 SV=3	0	96.07	13	24	232	23	2157	243.2	8.75	85.41	24	0	1.382	1.13	0.862585	0.860198	31.82	19.81	124.9	79.4	95.6	6.28	23.84	3.54	1.9663e+07	1.9251e+07	1.53133e+07	1.10712e+07	7.05145e+06	1.13619e+07	9.88652e+06	4.64255e+06	8.94085e+06	1.9663e+07	1.99018e+07	1.77144e+07	1.28964e+07	8.10117e+06	1.25048e+07	1.50504e+07	1.44907e+07	1.55559e+07	1
P51991	Heterogeneous nuclear ribonucleoprotein A3 OS=Homo sapiens OX=9606 GN=HNRNPA3 PE=1 SV=2	0	96.047	44	17	225	17	378	39.6	9.01	79.15	17	0	0.796	0.938	0.797213	0.963043	28.99	29.23	92.2	123.2	84.6	4.34	7.31	19.84	4.37139e+07	4.09918e+07	3.98987e+07	5.57584e+07	4.92766e+07	5.30769e+07	2.63569e+07	1.77171e+07	2.27408e+07	4.37139e+07	4.23776e+07	4.61548e+07	6.49509e+07	5.66122e+07	5.84156e+07	4.01234e+07	5.52999e+07	3.95661e+07	1
B5ME19	Eukaryotic translation initiation factor 3 subunit C-like protein OS=Homo sapiens OX=9606 GN=EIF3CL PE=1 SV=1	0	95.56	28	22	451	22	914	105.4	5.64	222.17	22	0	0.823	1.634	0.845067	0.0209178	24.13	26.8	105.2	133.6	61.3	16.23	7.15	17.37	1.03692e+08	1.03286e+08	1.19082e+08	1.16439e+08	1.28318e+08	1.16269e+08	3.83818e+07	2.56927e+07	3.57552e+07	1.03692e+08	1.06777e+08	1.37755e+08	1.35635e+08	1.4742e+08	1.27964e+08	5.84291e+07	8.01942e+07	6.22095e+07	1
Q13751	Laminin subunit beta-3 OS=Homo sapiens OX=9606 GN=LAMB3 PE=1 SV=1	0	95.202	27	24	366	24	1172	129.5	7.21	155	24	0	1.33	0.869	0.901337	0.876204	27.43	29.22	109.6	74	116.4	5.84	14.48	16.56	3.54714e+07	3.05381e+07	2.93426e+07	2.33442e+07	1.78127e+07	2.08102e+07	2.36806e+07	1.46126e+07	1.92887e+07	3.54714e+07	3.15704e+07	3.39436e+07	2.71928e+07	2.04644e+07	2.29034e+07	3.60493e+07	4.56102e+07	3.35599e+07	1
P23396	Small ribosomal subunit protein uS3 OS=Homo sapiens OX=9606 GN=RPS3 PE=1 SV=2	0	95.198	58	13	1073	13	243	26.7	9.66	532.61	13	0	1.476	1.169	0.771461	0.7836	20.26	25.27	117.9	78.3	103.8	12.6	3.1	5.26	6.72992e+08	835036183	6.46002e+08	4.26231e+08	4.34097e+08	4.28354e+08	4.32552e+08	2.16282e+08	3.50311e+08	6.72992e+08	8.63266e+08	7.47296e+08	4.96501e+08	4.98719e+08	4.71439e+08	6.58479e+08	6.75077e+08	6.09495e+08	1
Q12906	Interleukin enhancer-binding factor 3 OS=Homo sapiens OX=9606 GN=ILF3 PE=1 SV=3	0	95.118	20	16	338	13	894	95.3	8.76	118.31	16	3	1.421	0.964	0.842048	0.983822	22.87	27.01	104.2	68.6	127.2	10.46	8.27	18.29	5.74151e+07	5.75962e+07	6.01649e+07	3.00988e+07	3.59736e+07	3.56176e+07	4.77661e+07	2.94247e+07	3.71499e+07	5.74151e+07	5.95433e+07	6.95989e+07	3.50609e+07	4.13288e+07	3.92002e+07	7.27149e+07	9.18427e+07	6.4636e+07	1
P52272	Heterogeneous nuclear ribonucleoprotein M OS=Homo sapiens OX=9606 GN=HNRNPM PE=1 SV=3	0	95.068	28	21	734	21	730	77.5	8.7	348.91	21	0	0.899	1.161	0.920742	0.806945	24.67	20.69	101.9	111.9	86.2	5.04	3.67	3.55	2.187e+08	2.23031e+08	1.80234e+08	2.08838e+08	1.97546e+08	2.18322e+08	1.21746e+08	5.57678e+07	1.06413e+08	2.187e+08	2.30571e+08	2.08494e+08	2.43267e+08	2.26954e+08	2.40282e+08	1.85336e+08	1.74067e+08	1.85146e+08	1
P68104	Elongation factor 1-alpha 1 OS=Homo sapiens OX=9606 GN=EEF1A1 PE=1 SV=1	0	95.033	42	14	781	8	462	50.1	9.01	338.37	14	5	1.307	0.846	0.908111	0.816504	24.24	44.74	98.7	82.4	118.9	11.17	4.38	10.8	4.94878e+08	5.8171e+08	4.33994e+08	3.59618e+08	3.50166e+08	3.98947e+08	3.96961e+08	217572505	3.14819e+08	4.94878e+08	6.01375e+08	5.02044e+08	4.18906e+08	4.02294e+08	4.39074e+08	6.04299e+08	6.79105e+08	5.47744e+08	1
Q5VTE0	Putative elongation factor 1-alpha-like 3 OS=Homo sapiens OX=9606 GN=EEF1A1P5 PE=5 SV=1	0	95.033	42	14	781	8	462	50.2	9.07	338.37	14	0	1.307	0.846	0.908111	0.816504	24.24	44.74	98.7	82.4	118.9	11.17	4.38	10.8	4.94878e+08	5.8171e+08	4.33994e+08	3.59618e+08	3.50166e+08	3.98947e+08	3.96961e+08	217572505	3.14819e+08	4.94878e+08	6.01375e+08	5.02044e+08	4.18906e+08	4.02294e+08	4.39074e+08	6.04299e+08	6.79105e+08	5.47744e+08	1
P08729	Keratin, type II cytoskeletal 7 OS=Homo sapiens OX=9606 GN=KRT7 PE=1 SV=5	0	94.895	43	21	762	18	469	51.4	5.48	399.48	21	1	1.083	0.874	0.999164	0.889745	24.18	21.57	105.6	86	108.3	7.37	5.5	7.59	1.51316e+08	1.69683e+08	1.41432e+08	1.06959e+08	1.15942e+08	1.26353e+08	9.95614e+07	5.64596e+07	9.6433e+07	1.51316e+08	1.7542e+08	1.63608e+08	1.24593e+08	1.33202e+08	1.39062e+08	1.51564e+08	1.76226e+08	1.67781e+08	1
O60841	Eukaryotic translation initiation factor 5B OS=Homo sapiens OX=9606 GN=EIF5B PE=1 SV=4	0	94.892	20	23	287	23	1220	138.7	5.49	96.35	23	0	1.89	1.168	0.317081	0.783875	29.25	30.45	129.7	56.7	113.5	5.68	18.7	7.91	2.91744e+07	2.90527e+07	2.81108e+07	1.12746e+07	1.16776e+07	8.54212e+06	1.52345e+07	8.64307e+06	1.51049e+07	2.91744e+07	3.00349e+07	3.25187e+07	1.31333e+07	1.34159e+07	9.40132e+06	2.31917e+07	2.69775e+07	2.62806e+07	1
P54136	Arginine--tRNA ligase, cytoplasmic OS=Homo sapiens OX=9606 GN=RARS1 PE=1 SV=2	0	94.4	37	22	441	22	660	75.3	6.68	211.05	22	0	1.198	0.806	0.965964	0.671067	21.73	21.36	92.6	79.1	128.3	7.36	12.59	8.98	5.92161e+07	5.89483e+07	5.87176e+07	4.46842e+07	5.23829e+07	4.26489e+07	5.5476e+07	2.83376e+07	4.26004e+07	5.92161e+07	6.09411e+07	6.79246e+07	5.20509e+07	6.01809e+07	4.69388e+07	8.44518e+07	8.84496e+07	7.41192e+07	1
Q9NS87	Kinesin-like protein KIF15 OS=Homo sapiens OX=9606 GN=KIF15 PE=1 SV=1	0	94.073	21	24	238	24	1388	160.1	6	85.52	24	0	1.302	2.691	0.912488	5.82008e-09	19.77	85.49	172.8	117.9	9.3	15.55	14.16	23.83	2.87844e+07	2.89624e+07	3.28394e+07	1.74114e+07	1.77863e+07	2.34352e+07	944590	717152	928710	2.87844e+07	2.99415e+07	3.79887e+07	2.02819e+07	2.0434e+07	2.57924e+07	1.43796e+06	2.23843e+06	1.61583e+06	1
O14950	Myosin regulatory light chain 12B OS=Homo sapiens OX=9606 GN=MYL12B PE=1 SV=2	0	94.043	56	12	2301	12	172	19.8	4.84	1256.51	12	0	0.773	0.93	0.741693	0.954745	33.74	36.17	87.7	122	90.2	8.66	1.53	19.73	3.86343e+09	3.29476e+09	2840753884	4.0682e+09	4.23532e+09	4.30584e+09	2.30185e+09	7.78989e+08	2.01756e+09	3.86343e+09	3.40615e+09	3.28619e+09	4.73889e+09	4.86581e+09	4.73894e+09	3.50414e+09	2.43145e+09	3.51029e+09	1
P19105	Myosin regulatory light chain 12A OS=Homo sapiens OX=9606 GN=MYL12A PE=1 SV=2	0	94.043	56	12	2301	12	171	19.8	4.81	1256.51	12	0	0.773	0.93	0.741693	0.954745	33.74	36.17	87.7	122	90.2	8.66	1.53	19.73	3.86343e+09	3.29476e+09	2840753884	4.0682e+09	4.23532e+09	4.30584e+09	2.30185e+09	7.78989e+08	2.01756e+09	3.86343e+09	3.40615e+09	3.28619e+09	4.73889e+09	4.86581e+09	4.73894e+09	3.50414e+09	2.43145e+09	3.51029e+09	1
Q86VI3	Ras GTPase-activating-like protein IQGAP3 OS=Homo sapiens OX=9606 GN=IQGAP3 PE=1 SV=2	0	93.797	19	24	289	22	1631	184.6	7.65	103.23	24	0	1.776	1.135	0.440746	0.82311	28.4	18.11	140	43	117	13.15	56.23	16.45	1.05042e+07	1.32303e+07	1.08764e+07	1.97688e+06	6.27413e+06	3.50824e+06	6.90497e+06	2.95403e+06	7.32197e+06	1.05042e+07	1.36775e+07	1.25818e+07	2.30279e+06	7.20813e+06	3.86111e+06	1.05115e+07	9.22036e+06	1.27393e+07	1
Q69YQ0	Cytospin-A OS=Homo sapiens OX=9606 GN=SPECC1L PE=1 SV=3	0	92.897	20	20	237	20	1117	124.5	5.76	92.31	20	0	1.777	0.901	0.440746	0.945108	26.7	40.7	116.2	51.7	132.1	38.88	28.4	25	9.32274e+06	2.05866e+07	1.34423e+07	3.71961e+06	6.79343e+06	6.29106e+06	1.06618e+07	8.14512e+06	1.01589e+07	9.32274e+06	2.12826e+07	1.555e+07	4.33284e+06	7.80474e+06	6.92384e+06	1.62306e+07	2.54232e+07	1.76752e+07	1
Q9UQ35	Serine/arginine repetitive matrix protein 2 OS=Homo sapiens OX=9606 GN=SRRM2 PE=1 SV=2	0	92.89	12	23	330	23	2752	299.4	12.06	139.76	23	0	1.023	1.163	0.976582	0.804455	23.26	22.97	107.3	103.9	88.8	8.76	6.9	5.65	2.86691e+07	3.07821e+07	2.95476e+07	2.93206e+07	2.6149e+07	2.80027e+07	1.58276e+07	8.59132e+06	1.51405e+07	2.86691e+07	3.18228e+07	3.41806e+07	3.41544e+07	3.00416e+07	3.08193e+07	2.40946e+07	2.68159e+07	2.63426e+07	1
Q9Y262	Eukaryotic translation initiation factor 3 subunit L OS=Homo sapiens OX=9606 GN=EIF3L PE=1 SV=1	0	92.644	32	17	369	17	564	66.7	6.34	154.36	17	0	0.854	1.458	0.880027	0.114913	21.99	32.41	104.9	128.7	66.4	18.06	10.36	14.39	5.08632e+07	5.04087e+07	6.00231e+07	5.49222e+07	6.42243e+07	5.50625e+07	2.16712e+07	1.32585e+07	1.8471e+07	5.08632e+07	5.21129e+07	6.94347e+07	6.39768e+07	7.37851e+07	6.06009e+07	3.29903e+07	4.13836e+07	3.21371e+07	1
P54886	Delta-1-pyrroline-5-carboxylate synthase OS=Homo sapiens OX=9606 GN=ALDH18A1 PE=1 SV=2	0	91.33	27	19	472	19	795	87.2	7.12	176.08	19	0	0.924	1.044	0.930685	0.954745	27.38	22.72	106.1	113.3	80.5	8.63	12.59	5.35	2.21995e+07	2.54208e+07	2.18151e+07	2.31351e+07	2.58375e+07	2.09283e+07	1.22374e+07	6.13644e+06	1.18609e+07	2.21995e+07	2.62802e+07	2.52357e+07	2.69492e+07	2.96838e+07	2.30334e+07	1.86292e+07	1.91536e+07	2.06364e+07	1
P25705	ATP synthase subunit alpha, mitochondrial OS=Homo sapiens OX=9606 GN=ATP5F1A PE=1 SV=1	0	90.828	37	16	601	16	553	59.7	9.13	285.48	16	0	1.198	0.91	0.965964	0.938792	20.34	27.08	103.3	87.4	109.3	2.98	4.07	19.02	135818683	1.39083e+08	1.19136e+08	9.57784e+07	1.05352e+08	1.05974e+08	8.66288e+07	6.04257e+07	8.38139e+07	135818683	1.43785e+08	1.37816e+08	1.11569e+08	1.21035e+08	1.16633e+08	1.31876e+08	1.88606e+08	1.45825e+08	1
P47897	Glutamine--tRNA ligase OS=Homo sapiens OX=9606 GN=QARS1 PE=1 SV=1	0	90.79	32	24	393	24	775	87.7	7.15	151.74	24	0	1.288	0.823	0.927979	0.730349	22.45	26.89	101.1	83.5	115.4	9.12	12.68	11.59	2.47993e+07	2.73618e+07	2.56618e+07	2.21115e+07	2.03444e+07	1.81251e+07	2.1216e+07	1.2352e+07	1.79661e+07	2.47993e+07	2.82869e+07	2.96856e+07	2.57569e+07	2.3373e+07	1.99482e+07	3.22974e+07	3.85541e+07	3.12586e+07	1
P23258	Tubulin gamma-1 chain OS=Homo sapiens OX=9606 GN=TUBG1 PE=1 SV=2	0	90.734	48	19	384	19	451	51.1	6.14	145.19	19	0	1.255	0.801	0.932471	0.643869	24.05	19.22	101	79	120	4.74	3.2	9.24	3.95813e+07	4.11801e+07	37455594	3.00688e+07	2.87725e+07	3.02273e+07	3.32109e+07	1.8732e+07	2.84758e+07	3.95813e+07	4.25723e+07	4.33287e+07	3.5026e+07	3.30557e+07	3.32677e+07	5.05574e+07	5.84677e+07	4.95443e+07	1
Q96S66	Chloride channel CLIC-like protein 1 OS=Homo sapiens OX=9606 GN=CLCC1 PE=1 SV=1	0	90.612	45	20	125	20	551	62	5.55	44.89	20	0	1.257	0.182	0.930685	1.6177e-16	35.6	33.71	15.4	12.2	272.4	53.03	28.58	27.51	2.36999e+06	2.0509e+06	4.50027e+06	1.6105e+06	1.82104e+06	1.05307e+06	2.75771e+07	1.83965e+07	1.91924e+07	2.36999e+06	2.12023e+06	5.20592e+06	1.87601e+06	2.09213e+06	1.15899e+06	4.1981e+07	5.74206e+07	3.33923e+07	1
P42695	Condensin-2 complex subunit D3 OS=Homo sapiens OX=9606 GN=NCAPD3 PE=1 SV=2	0	90.495	22	24	209	24	1498	168.8	7.5	68.38	24	0	1.631	1.107	0.614059	0.880405	20.24	36.99	150.3	57.9	91.8	11.84	19.94	2.61	2.16724e+07	2.65778e+07	2.19743e+07	8.4018e+06	1.13744e+07	8.2609e+06	1.02053e+07	4.76005e+06	8.94544e+06	2.16724e+07	2.74763e+07	2.54199e+07	9.78695e+06	1.30676e+07	9.09182e+06	1.55357e+07	1.48575e+07	1.55639e+07	1
P15311	Ezrin OS=Homo sapiens OX=9606 GN=EZR PE=1 SV=4	0	90.467	31	22	365	16	586	69.4	6.27	185.96	22	0	1.25	0.873	0.932471	0.90071	36.74	38.39	111.1	91.1	97.9	15.42	20.56	9.87	1.72309e+07	2.27656e+07	1.78114e+07	1.49431e+07	1.47059e+07	1.0638e+07	1.19266e+07	6.84302e+06	1.03513e+07	1.72309e+07	2.35353e+07	2.06043e+07	1.74067e+07	1.68951e+07	1.1708e+07	1.8156e+07	2.1359e+07	1.80099e+07	1
Q7Z478	ATP-dependent RNA helicase DHX29 OS=Homo sapiens OX=9606 GN=DHX29 PE=1 SV=2	0	90.465	17	20	356	19	1369	155.1	8.09	156.2	20	1	1.903	1.299	0.303734	0.412267	20.72	24.05	142	62.2	95.8	16.04	10.14	8.63	3.50454e+07	4.48622e+07	4.10779e+07	1.96981e+07	1.76846e+07	1.70803e+07	2.33369e+07	1.00287e+07	1.73838e+07	3.50454e+07	4.63789e+07	4.7519e+07	2.29456e+07	2.03172e+07	1.87983e+07	3.5526e+07	3.13024e+07	3.02456e+07	1
P51659	Peroxisomal multifunctional enzyme type 2 OS=Homo sapiens OX=9606 GN=HSD17B4 PE=1 SV=3	0	90.378	31	17	351	17	736	79.6	8.84	157.17	17	0	1.031	1	0.978238	0.994006	29.75	33.72	106.3	98.8	94.9	27.23	8.82	18.85	2.763e+07	4.68445e+07	3.33177e+07	2.74101e+07	3.31441e+07	3.25416e+07	2.26007e+07	1.49219e+07	19421769	2.763e+07	4.84281e+07	3.8542e+07	3.1929e+07	3.80781e+07	3.58148e+07	3.44053e+07	4.65754e+07	3.37914e+07	1
A5YKK6	CCR4-NOT transcription complex subunit 1 OS=Homo sapiens OX=9606 GN=CNOT1 PE=1 SV=2	0	90.336	9	22	336	22	2376	266.8	7.11	139.4	22	0	1.221	0.946	0.944469	0.976281	21.22	25.46	110.4	82.9	106.7	7.14	7.64	3.88	1.75088e+07	1.85691e+07	1.74515e+07	1.23503e+07	1.25457e+07	1.48951e+07	1.21907e+07	5.55641e+06	1.06731e+07	1.75088e+07	1.91969e+07	2.01879e+07	1.43864e+07	1.44133e+07	1.63933e+07	1.85581e+07	1.73431e+07	1.85699e+07	1
P13647	Keratin, type II cytoskeletal 5 OS=Homo sapiens OX=9606 GN=KRT5 PE=1 SV=3	0	90.299	30	21	346	10	590	62.3	7.74	161.35	21	2	3.652	0.732	0.000258514	0.303212	82.33	65.61	114.8	10.4	174.8	46.11	102.48	50.41	1.91595e+07	1.95415e+07	3.55092e+07	902971	1.58595e+06	6.90106e+06	1.36202e+07	1.78504e+07	1.76788e+07	1.91595e+07	2.02022e+07	4.10771e+07	1.05184e+06	1.82204e+06	7.5952e+06	2.07341e+07	5.5716e+07	3.07589e+07	1
P02545	Prelamin-A/C OS=Homo sapiens OX=9606 GN=LMNA PE=1 SV=1	0	89.855	37	21	300	20	664	74.1	7.02	126.89	21	1	1.499	0.904	0.743537	0.929972	31.22	25.16	107	76.9	116.1	7.93	10.25	12.23	5.40519e+07	5.37289e+07	5.40891e+07	3.30132e+07	3.47098e+07	4.22016e+07	3.51834e+07	2.19116e+07	3.46232e+07	5.40519e+07	5.55453e+07	6.25704e+07	3.84558e+07	3.98769e+07	4.64464e+07	5.35601e+07	6.83923e+07	6.02399e+07	1
Q13200	26S proteasome non-ATPase regulatory subunit 2 OS=Homo sapiens OX=9606 GN=PSMD2 PE=1 SV=3	0	89.694	28	20	223	20	908	100.1	5.2	85.12	20	0	1.248	0.873	0.932471	0.885988	30.41	31.12	107.8	82.1	110	14.34	7.87	4.51	3.2555e+07	4.19221e+07	3.479e+07	2.63155e+07	2.97579e+07	2.67346e+07	2.49348e+07	1.3152e+07	2.36318e+07	3.2555e+07	4.33393e+07	4.02451e+07	3.06539e+07	3.41878e+07	2.94237e+07	3.79585e+07	4.10513e+07	4.11162e+07	1
Q8WUM4	Programmed cell death 6-interacting protein OS=Homo sapiens OX=9606 GN=PDCD6IP PE=1 SV=1	0	89.641	27	20	355	20	868	96	6.52	147.78	20	0	0.927	0.958	0.932471	0.980177	18.69	21.82	96.5	104.9	98.6	9.13	10.86	6.38	4.80091e+07	5.56027e+07	4.46399e+07	3.98205e+07	4.92312e+07	5.10226e+07	3.84533e+07	1.69076e+07	3.00447e+07	4.80091e+07	5.74824e+07	5.16395e+07	4.63854e+07	5.656e+07	5.61546e+07	5.85379e+07	5.27735e+07	5.22739e+07	1
P26038	Moesin OS=Homo sapiens OX=9606 GN=MSN PE=1 SV=3	0	89.511	33	24	335	17	577	67.8	6.4	161.65	24	6	1.26	1.147	0.930685	0.848031	35.78	36.58	107.4	96.5	96.1	28.1	5.34	15.75	7.4233e+07	1.19277e+08	7.14585e+07	6.87209e+07	6.46777e+07	6.56664e+07	4.39311e+07	2.90061e+07	4.25002e+07	7.4233e+07	1.2331e+08	8.26633e+07	8.00504e+07	7.43059e+07	7.22714e+07	6.68769e+07	9.05363e+07	7.39449e+07	1
P11586	C-1-tetrahydrofolate synthase, cytoplasmic OS=Homo sapiens OX=9606 GN=MTHFD1 PE=1 SV=4	0	89.362	21	20	505	20	935	101.5	7.3	265.34	20	0	1.148	0.905	0.970641	0.929972	17.97	21.34	99.2	84.6	116.2	10.75	4.82	13.52	6.87161e+07	8.24495e+07	68347704	5.75431e+07	5.87308e+07	6.63367e+07	5.32728e+07	3.40593e+07	5.32348e+07	6.87161e+07	8.52369e+07	7.90647e+07	6.70298e+07	6.74738e+07	7.30091e+07	8.10979e+07	1.06309e+08	9.26216e+07	1
Q13310	Polyadenylate-binding protein 4 OS=Homo sapiens OX=9606 GN=PABPC4 PE=1 SV=1	0	89.218	29	17	384	12	644	70.7	9.26	182.67	17	0	2.171	1.02	0.122755	0.98203	18.39	31.43	125.9	52.6	121.5	16.89	5.77	14.54	5.38675e+07	6.09595e+07	6.52135e+07	2.31814e+07	2.29197e+07	2.19449e+07	3.92081e+07	2.46034e+07	3.4959e+07	5.38675e+07	6.30203e+07	7.54391e+07	2.70032e+07	2.63317e+07	2.41522e+07	5.9687e+07	7.67941e+07	6.08241e+07	1
Q9NYL9	Tropomodulin-3 OS=Homo sapiens OX=9606 GN=TMOD3 PE=1 SV=1	0	89.139	56	17	588	16	352	39.6	5.19	272.48	17	1	0.8	1.03	0.801155	0.974248	27.47	31.31	92.3	121.2	86.4	4.02	9.14	15.79	2.43406e+08	2.44656e+08	2.0175e+08	274389224	2.60526e+08	3.25228e+08	1.58282e+08	5.66057e+07	1.30992e+08	2.43406e+08	2.52927e+08	2.33385e+08	3.19626e+08	2.9931e+08	3.57941e+08	2.40955e+08	1.76682e+08	2.27908e+08	1
P11940	Polyadenylate-binding protein 1 OS=Homo sapiens OX=9606 GN=PABPC1 PE=1 SV=2	0	88.984	28	18	535	9	636	70.6	9.5	254.26	18	6	2.338	1.173	0.0678951	0.77417	18.4	19.52	135.3	56.6	108.1	12.35	2.23	9.69	1.97037e+08	2.28097e+08	2.17714e+08	8.23354e+07	8.58948e+07	9.10774e+07	1.22225e+08	7.06127e+07	1.08228e+08	1.97037e+08	2.35808e+08	2.51852e+08	9.59095e+07	9.86815e+07	1.00238e+08	1.86065e+08	2.20402e+08	1.88302e+08	1
P55884	Eukaryotic translation initiation factor 3 subunit B OS=Homo sapiens OX=9606 GN=EIF3B PE=1 SV=3	0	88.46	26	17	386	17	814	92.4	5	185.15	17	0	0.842	1.414	0.862585	0.169988	30.26	36.78	104.8	137.1	58.1	20.77	2.78	33.53	5.21141e+07	5.66778e+07	6.67119e+07	6.58126e+07	6.71866e+07	6.66102e+07	1.99306e+07	1.7287e+07	1.86827e+07	5.21141e+07	5.85939e+07	7.71724e+07	7.66627e+07	7.71883e+07	7.33102e+07	3.03406e+07	5.39576e+07	3.25055e+07	1
P05198	Eukaryotic translation initiation factor 2 subunit 1 OS=Homo sapiens OX=9606 GN=EIF2S1 PE=1 SV=3	0	88.224	60	19	389	19	315	36.1	5.08	161.64	19	0	1.392	1.314	0.862383	0.369207	27.63	27.79	129.7	81.2	89.1	13.42	7.07	11.04	6.93942e+07	8.63102e+07	7.57521e+07	5.25139e+07	4.77602e+07	4.88408e+07	4.6653e+07	1.85841e+07	3.46135e+07	6.93942e+07	8.92281e+07	8.76301e+07	6.11715e+07	5.487e+07	5.37534e+07	7.10204e+07	5.80063e+07	6.0223e+07	1
P53618	Coatomer subunit beta OS=Homo sapiens OX=9606 GN=COPB1 PE=1 SV=3	0	88.212	34	23	333	23	953	107.1	6.05	112.49	23	0	1.039	0.96	0.985529	0.982411	25.29	24.18	93.6	96.7	109.7	6.32	10.89	4.36	35848658	3.92218e+07	3.23161e+07	3.13048e+07	33609519	4.07486e+07	2.72338e+07	1.4038e+07	25985561	35848658	4.05477e+07	3.73834e+07	3.64658e+07	3.86128e+07	4.48473e+07	4.14584e+07	4.38167e+07	4.52115e+07	1
Q5JTH9	RRP12-like protein OS=Homo sapiens OX=9606 GN=RRP12 PE=1 SV=2	0	88.094	23	21	260	21	1297	143.6	8.75	92.33	21	0	1.066	1.12	0.99661	0.860198	24.87	31.1	106.4	102.8	90.8	10.77	9.98	5.76	1.75741e+07	1.91771e+07	1.38408e+07	1.56417e+07	1.47929e+07	1.35571e+07	9.55709e+06	5.20522e+06	8.62412e+06	1.75741e+07	1.98254e+07	1.6011e+07	1.82204e+07	1.6995e+07	1.49208e+07	1.45489e+07	1.6247e+07	1.50049e+07	1
Q9UPY3	Endoribonuclease Dicer OS=Homo sapiens OX=9606 GN=DICER1 PE=1 SV=3	0	87.62	15	21	251	21	1922	218.5	5.68	82.06	21	0	1.03	0.69	0.977772	0.244467	21.39	31.4	104.4	79.3	116.3	15.21	13.82	34.24	9.50789e+06	1.2093e+07	1.08825e+07	6.56253e+06	8.27099e+06	9.11027e+06	8.59786e+06	7.51426e+06	8.002e+06	9.50789e+06	1.25018e+07	1.25889e+07	7.64444e+06	9.50225e+06	1.00266e+07	1.30886e+07	2.34541e+07	1.39224e+07	1
P49368	T-complex protein 1 subunit gamma OS=Homo sapiens OX=9606 GN=CCT3 PE=1 SV=4	0	87.274	38	19	445	19	545	60.5	6.49	185.79	19	0	1.005	1.07	0.966368	0.947355	21.16	20.73	101.3	99.8	99	5.84	6.48	7.69	6.00749e+07	6.02392e+07	5.8163e+07	5.31947e+07	5.33989e+07	4.99784e+07	3.80515e+07	2.15478e+07	3.49821e+07	6.00749e+07	6.22757e+07	6.7283e+07	6.19645e+07	6.13481e+07	5.50054e+07	5.79262e+07	6.72569e+07	6.08643e+07	1
P60660	Myosin light polypeptide 6 OS=Homo sapiens OX=9606 GN=MYL6 PE=1 SV=2	0	87.187	88	13	1020	10	151	16.9	4.65	543.47	13	4	0.76	0.985	0.714477	0.99717	35.25	43.44	86.6	105.9	107.6	5.84	10.48	13.81	1.89742e+09	1.80573e+09	1.46949e+09	1.9605e+09	2.24965e+09	1.91027e+09	1.52385e+09	5.8793e+08	1.3721e+09	1.89742e+09	1.86678e+09	1.69991e+09	2.28372e+09	2.58455e+09	2.10241e+09	2.31977e+09	1.8351e+09	2.38727e+09	1
P04259	Keratin, type II cytoskeletal 6B OS=Homo sapiens OX=9606 GN=KRT6B PE=1 SV=5	0	86.774	28	20	326	6	564	60	8	165.34	20	0	100	0.918	1.5566e-16	0.992464		53.33	141.3		158.7	38.18		33.3	2.69913e+06	1.7734e+06	3.44807e+06				1.29231e+06	1.26642e+06	1.74236e+06	2.69913e+06	1.83336e+06	3.98873e+06				1.9673e+06	3.95287e+06	3.03149e+06	1
Q9UHB6	LIM domain and actin-binding protein 1 OS=Homo sapiens OX=9606 GN=LIMA1 PE=1 SV=1	0	86.421	30	17	249	17	759	85.2	6.84	75.83	17	0	1.4	0.854	0.856748	0.860198	45.39	49.32	104.1	73.6	122.3	43.91	5.96	35.82	1.77297e+07	3.55006e+07	1.61219e+07	1.21426e+07	1.0943e+07	1.19751e+07	9.2789e+06	9.56739e+06	1.25986e+07	1.77297e+07	3.67007e+07	1.86498e+07	1.41445e+07	1.2572e+07	1.31796e+07	1.41254e+07	2.98625e+07	2.19199e+07	1
Q562R1	Beta-actin-like protein 2 OS=Homo sapiens OX=9606 GN=ACTBL2 PE=1 SV=2	0	86.379	38	14	836	5	376	42	5.59	416.68	14	0																															1
O94915	Protein furry homolog-like OS=Homo sapiens OX=9606 GN=FRYL PE=1 SV=2	0	85.671	9	23	274	23	3013	339.4	5.58	101.97	23	0	1.007	2.026	0.967525	0.000179755	24.93	55.48	143.7	148.6	7.7	20.04	4.9	89.11	1.95094e+07	2.1236e+07	2.46824e+07	1.94974e+07	1.94693e+07	2.22488e+07	768462	1.57506e+06	679967	1.95094e+07	2.19539e+07	2.85526e+07	2.27118e+07	2.23675e+07	2.44867e+07	1.16984e+06	4.91619e+06	1.18305e+06	1
Q9NYF8	Bcl-2-associated transcription factor 1 OS=Homo sapiens OX=9606 GN=BCLAF1 PE=1 SV=2	0	85.401	29	21	322	20	920	106.1	9.98	124.57	21	1	0.864	1.251	0.888573	0.48661	36.16	38.28	87.1	135.1	77.9	12.44	18.98	45.04	1.92872e+07	1.9298e+07	2.08615e+07	2.65732e+07	2.84698e+07	2.04533e+07	1.17229e+07	1.16521e+07	1.00954e+07	1.92872e+07	1.99504e+07	2.41326e+07	3.09541e+07	3.2708e+07	2.25105e+07	1.7846e+07	3.63695e+07	1.75648e+07	1
P42166	Lamina-associated polypeptide 2, isoform alpha OS=Homo sapiens OX=9606 GN=TMPO PE=1 SV=2	0	85.397	39	18	425	12	694	75.4	7.66	185.44	18	5	2.282	1.178	0.0842202	0.761151	30.36	21.91	141.1	51.6	107.3	10.41	21.41	10.2	9.40477e+07	1.0169e+08	1.00205e+08	4.04234e+07	2.65658e+07	3.49653e+07	5.25187e+07	2.92217e+07	4.30259e+07	9.40477e+07	1.05128e+08	1.15917e+08	4.70877e+07	3.05205e+07	3.84822e+07	7.99499e+07	9.12092e+07	7.48595e+07	1
Q12968	Nuclear factor of activated T-cells, cytoplasmic 3 OS=Homo sapiens OX=9606 GN=NFATC3 PE=1 SV=1	0	85.323	21	16	294	16	1075	115.5	6.37	134.1	16	0	1.408	0.557	0.846334	0.00503647	25.87	34.81	87.5	61.2	151.2	7.85	10.93	35.72	2.30816e+07	2.26788e+07	22961266	1.40871e+07	1.69415e+07	1.45443e+07	2.66171e+07	2.11224e+07	1.97135e+07	2.30816e+07	2.34455e+07	2.65616e+07	1.64095e+07	1.94635e+07	1.60073e+07	4.05195e+07	6.59289e+07	3.42989e+07	1
P31943	Heterogeneous nuclear ribonucleoprotein H OS=Homo sapiens OX=9606 GN=HNRNPH1 PE=1 SV=4	0	84.98	45	14	1052	7	449	49.2	6.3	508.13	14	7	1.058	0.627	0.994877	0.0456259	31.49	36.95	87.3	78.1	134.6	19.15	9.33	29.36	2.24059e+08	2.43824e+08	2.79257e+08	1.77777e+08	1.96456e+08	2.26617e+08	2.55339e+08	1.9284e+08	206889168	2.24059e+08	2.52067e+08	3.23045e+08	2.07085e+08	2.25702e+08	2.49411e+08	3.88705e+08	6.01908e+08	3.5996e+08	1
P28799	Progranulin OS=Homo sapiens OX=9606 GN=GRN PE=1 SV=2	0	84.82	23	14	474	14	593	63.5	6.83	230.2	14	0	0.663	0.511	0.45477	0.000737975	28.75	43.49	66.9	104.1	129.1	12.93	8.18	25.67	1.00986e+08	8.9428e+07	1.02722e+08	1.34964e+08	1.31112e+08	1.59953e+08	1.28068e+08	7.94005e+07	8.44526e+07	1.00986e+08	9.24513e+07	1.18829e+08	1.57215e+08	1.5063e+08	1.76042e+08	1.94959e+08	2.47831e+08	1.46937e+08	1
P14923	Junction plakoglobin OS=Homo sapiens OX=9606 GN=JUP PE=1 SV=3	0	84.798	29	16	458	15	745	81.7	6.14	243	16	1	0.84	1.056	0.862585	0.954745	19.73	15.44	96.7	120.5	82.7	4.62	8.13	4.97	6.04894e+07	5.81352e+07	4.80724e+07	5.72083e+07	6.8057e+07	6.80662e+07	3.44541e+07	1.52756e+07	2.95539e+07	6.04894e+07	6.01005e+07	5.56102e+07	6.66398e+07	7.81883e+07	7.49126e+07	5.24499e+07	4.76795e+07	5.142e+07	1
O00308	NEDD4-like E3 ubiquitin-protein ligase WWP2 OS=Homo sapiens OX=9606 GN=WWP2 PE=1 SV=2	0	84.777	30	22	299	20	870	98.9	7.12	147.66	22	1	1.222	1.004	0.944469	0.99265	18.57	25.94	106.5	87.1	106.3	1.49	11.83	12	4.12666e+07	3.87453e+07	3.52184e+07	2.8612e+07	2.91886e+07	2.45525e+07	2.67162e+07	1.05484e+07	2.35943e+07	4.12666e+07	4.00551e+07	4.07407e+07	3.3329e+07	3.35337e+07	2.70221e+07	4.06704e+07	3.29246e+07	4.10511e+07	1
O95340	Bifunctional 3'-phosphoadenosine 5'-phosphosulfate synthase 2 OS=Homo sapiens OX=9606 GN=PAPSS2 PE=1 SV=2	0	84.757	36	18	319	17	614	69.5	8.03	113.55	18	1	0.986	0.884	0.965964	0.905467	31.36	16.32	97.4	97.1	105.5	4.41	4.72	14.72	3.13943e+07	3.10103e+07	2.95153e+07	2.87201e+07	2.77983e+07	2.76581e+07	2.67663e+07	1.11211e+07	1.7475e+07	3.13943e+07	3.20586e+07	3.41433e+07	3.3455e+07	3.19365e+07	3.044e+07	4.07467e+07	3.47121e+07	3.04043e+07	1
O75592	E3 ubiquitin-protein ligase MYCBP2 OS=Homo sapiens OX=9606 GN=MYCBP2 PE=1 SV=4	0	84.67	6	24	205	24	4678	513.3	7.02	56.27	24	0	0.972	1.037	0.965964	0.953694	18.93	27.74	101.3	91.7	107	17.61	7.54	9.16	5.34961e+06	6869696	6.55725e+06	5.97404e+06	5.21126e+06	5.83944e+06	5.14001e+06	2.40436e+06	3.75974e+06	5.34961e+06	7.10194e+06	7.58544e+06	6.95894e+06	5.98704e+06	6.4268e+06	7.8247e+06	7.50468e+06	6.54146e+06	1
O43242	26S proteasome non-ATPase regulatory subunit 3 OS=Homo sapiens OX=9606 GN=PSMD3 PE=1 SV=2	0	84.357	37	20	290	20	534	60.9	8.44	125.59	20	0	1.165	0.899	0.965964	0.922241	21.84	25.58	100.9	88.8	110.2	10.43	19.54	16.21	3.51027e+07	4.17685e+07	3.32245e+07	2.79681e+07	3.98747e+07	3.07274e+07	2.75691e+07	1.71664e+07	2.30119e+07	3.51027e+07	4.31806e+07	3.84342e+07	3.2579e+07	4.58106e+07	3.3818e+07	4.19687e+07	5.35812e+07	4.00378e+07	1
Q9H0A0	RNA cytidine acetyltransferase OS=Homo sapiens OX=9606 GN=NAT10 PE=1 SV=2	0	84.037	24	20	347	20	1025	115.7	8.27	144.2	20	0	1.627	1.059	0.620878	0.954745	15.25	19.06	122.9	64.4	112.7	6	14.54	10.99	3.90262e+07	4.25757e+07	3.59778e+07	1.8729e+07	1.70682e+07	2.36638e+07	2.52343e+07	1.00702e+07	2.19253e+07	3.90262e+07	4.4015e+07	4.16191e+07	2.18167e+07	1.96091e+07	2.6044e+07	3.84145e+07	3.14318e+07	3.81473e+07	1
Q7L014	Probable ATP-dependent RNA helicase DDX46 OS=Homo sapiens OX=9606 GN=DDX46 PE=1 SV=2	0	83.827	20	20	443	20	1031	117.3	9.29	213.47	20	0	1.224	1.049	0.942678	0.958055	16.38	28.72	109.2	90.9	99.9	11.26	1.07	16.97	5.00217e+07	5.27311e+07	5.39453e+07	3.94693e+07	3.94841e+07	4.08981e+07	3.04285e+07	2.03202e+07	2.86536e+07	5.00217e+07	5.45137e+07	6.2404e+07	4.59764e+07	4.53619e+07	4.50119e+07	4.63217e+07	6.34252e+07	4.98536e+07	1
Q9BUJ2	Heterogeneous nuclear ribonucleoprotein U-like protein 1 OS=Homo sapiens OX=9606 GN=HNRNPUL1 PE=1 SV=2	0	83.798	27	18	303	18	856	95.7	6.92	118.4	18	0	1.458	1.173	0.797641	0.77417	26.66	32.31	123.9	86.9	89.2	7.23	14.27	20.22	9.85284e+07	8.57592e+07	8.82888e+07	4.99407e+07	6.75535e+07	6.27671e+07	4.6583e+07	3.1188e+07	3.94402e+07	9.85284e+07	8.86584e+07	1.02133e+08	5.81741e+07	7.76098e+07	6.90805e+07	7.09139e+07	9.73467e+07	6.86209e+07	1
O60610	Protein diaphanous homolog 1 OS=Homo sapiens OX=9606 GN=DIAPH1 PE=1 SV=2	0	83.695	18	17	306	17	1272	141.3	5.41	134.83	17	0	1.327	1.042	0.901337	0.964163	24.09	29.04	112.5	81.5	105.9	12.36	10.76	6.84	5.41662e+07	6.41764e+07	4.64045e+07	3.36944e+07	2.95387e+07	3.82318e+07	3.34905e+07	1.51431e+07	3.11572e+07	5.41662e+07	6.6346e+07	5.36807e+07	3.92494e+07	3.3936e+07	4.20774e+07	5.0983e+07	4.72658e+07	5.42096e+07	1
P04920	Anion exchange protein 2 OS=Homo sapiens OX=9606 GN=SLC4A2 PE=1 SV=4	0	83.621	20	19	337	19	1241	136.9	6.29	120.53	19	0	1.55	1.749	0.691861	0.00442635	24.59	19.83	143.5	85.8	70.7	9.48	6.15	12.19	3.14733e+07	2.65869e+07	2.86568e+07	1.55605e+07	1.63699e+07	1.85481e+07	1.07356e+07	4.12162e+06	8.91558e+06	3.14733e+07	2.74858e+07	3.31502e+07	1.81258e+07	1.88068e+07	2.04137e+07	1.63429e+07	1.28647e+07	1.5512e+07	1
Q9HCC0	Methylcrotonoyl-CoA carboxylase beta chain, mitochondrial OS=Homo sapiens OX=9606 GN=MCCC2 PE=1 SV=1	0	83.399	34	17	206	17	563	61.3	7.68	64.26	17	0	0.776	1.028	0.743537	0.969162	20.51	22.52	76.7	116.7	106.6	13.42	9.05	11.22	1.64422e+07	1.97365e+07	1.39733e+07	18584733	2.17875e+07	2.33862e+07	1.24088e+07	7.46795e+06	1.31396e+07	1.64422e+07	2.04037e+07	1.61644e+07	2.16487e+07	2.50309e+07	2.57385e+07	1.889e+07	2.33096e+07	2.28612e+07	1
P31689	DnaJ homolog subfamily A member 1 OS=Homo sapiens OX=9606 GN=DNAJA1 PE=1 SV=2	0	83.28	44	16	302	16	397	44.8	7.08	133.5	16	0	1.066	0.904	0.99661	0.929972	31.48	25.1	99.8	86.6	113.5	18.9	17.15	14.52	5.22578e+07	5.14984e+07	6.23396e+07	3.96636e+07	3.1524e+07	4.65411e+07	3.97741e+07	1.71805e+07	4.10622e+07	5.22578e+07	5.32394e+07	7.21145e+07	4.62027e+07	3.62168e+07	5.12225e+07	6.05486e+07	5.36251e+07	7.14428e+07	1
P17858	ATP-dependent 6-phosphofructokinase, liver type OS=Homo sapiens OX=9606 GN=PFKL PE=1 SV=6	0	83.152	30	17	357	15	780	85	7.5	148.83	17	1	0.806	0.989	0.817756	0.999684	17.77	21.15	90.3	126.3	83.4	1.28	18.88	25.96	3.34522e+07	3.16998e+07	2.82493e+07	3.93691e+07	5.09718e+07	3.70948e+07	1.90751e+07	1.45188e+07	1.74129e+07	3.34522e+07	3.27715e+07	3.26788e+07	4.58596e+07	5.85597e+07	4.0826e+07	2.90383e+07	4.53171e+07	3.02962e+07	1
Q15654	Thyroid receptor-interacting protein 6 OS=Homo sapiens OX=9606 GN=TRIP6 PE=1 SV=3	0	82.937	43	13	247	13	476	50.3	7.37	90.17	13	0	1.525	0.545	0.716411	0.0045596	38.48	33.49	81.4	61.6	157	22.1	16.81	21.9	1.53935e+07	1.65004e+07	2.00337e+07	8.15255e+06	1.12293e+07	1.17692e+07	2.16144e+07	1.4561e+07	1.7638e+07	1.53935e+07	1.70582e+07	2.3175e+07	9.49661e+06	1.2901e+07	1.2953e+07	3.29038e+07	4.5449e+07	3.06878e+07	1
Q9NVI7	ATPase family AAA domain-containing protein 3A OS=Homo sapiens OX=9606 GN=ATAD3A PE=1 SV=2	0	82.651	30	18	551	9	634	71.3	8.98	269.21	18	8	2.205	0.972	0.109706	0.992464	27.56	20.51	126.5	48.6	124.9	5.49	21.85	9.49	1.35135e+08	1.37164e+08	1.30307e+08	4.68053e+07	3.91921e+07	6.30974e+07	9.0598e+07	5.2242e+07	8.04871e+07	1.35135e+08	1.41802e+08	1.50739e+08	5.45218e+07	4.50265e+07	6.9444e+07	1.37918e+08	1.63062e+08	1.40037e+08	1
Q15029	116 kDa U5 small nuclear ribonucleoprotein component OS=Homo sapiens OX=9606 GN=EFTUD2 PE=1 SV=1	0	82.477	30	20	385	20	972	109.4	5	148.54	20	0	1.059	1.094	0.994877	0.917432	20.25	21.1	112	98.2	89.8	12.72	3.94	6.77	3.51573e+07	4.17959e+07	3.88725e+07	3.47878e+07	3.29428e+07	3.44411e+07	2.2766e+07	1.20494e+07	1.89185e+07	3.51573e+07	4.32088e+07	4.49678e+07	4.0523e+07	3.78468e+07	3.79053e+07	3.46569e+07	3.76095e+07	3.29157e+07	1
P23246	Splicing factor, proline- and glutamine-rich OS=Homo sapiens OX=9606 GN=SFPQ PE=1 SV=2	0	82.468	30	15	467	14	707	76.1	9.44	163.72	15	1	2.015	1.428	0.212719	0.152813	34.58	35.34	137.9	68.2	94	16.35	3.79	7.62	1.54528e+08	2.07341e+08	1.70921e+08	7.94837e+07	8.50852e+07	9.05659e+07	8.38818e+07	4.74906e+07	7.74883e+07	1.54528e+08	2.1435e+08	1.97721e+08	9.25876e+07	9.77514e+07	9.96755e+07	1.27694e+08	1.48231e+08	1.3482e+08	1
Q10567	AP-1 complex subunit beta-1 OS=Homo sapiens OX=9606 GN=AP1B1 PE=1 SV=3	0	82.396	24	18	261	7	949	104.5	5.06	103	18	0	1.222	0.981	0.934426	0.977978	30.24	18.37	102.2	93.5	104.3	18.96	20.87	8.31	965369	824925	1.06153e+06	563289	874699	801944	646668	351487	536773	965369	852813	1.22798e+06	656155	1.00491e+06	882607	984432	1.09709e+06	933915	1
P12814	Alpha-actinin-1 OS=Homo sapiens OX=9606 GN=ACTN1 PE=1 SV=2	0	82.23	24	19	485	8	892	103	5.41	251.37	19	0	1.184	1.217	0.965964	0.590314	14.88	18.7	110.8	96.9	92.3	20.63	14.99	1.41	4.68114e+06	6.71497e+06	5.88016e+06	3.96928e+06	5.17908e+06	5.60624e+06	3.72323e+06	1.85088e+06	3.23059e+06	4.68114e+06	6.94198e+06	6.80218e+06	4.62367e+06	5.95006e+06	6.17014e+06	5.66792e+06	5.7771e+06	5.6208e+06	1
P48668	Keratin, type II cytoskeletal 6C OS=Homo sapiens OX=9606 GN=KRT6C PE=1 SV=3	0	82.121	26	19	294	6	564	60	8	151.54	19	0	100	0.918	1.5566e-16	0.992464		53.33	141.3		158.7	38.18		33.3	2.69913e+06	1.7734e+06	3.44807e+06				1.29231e+06	1.26642e+06	1.74236e+06	2.69913e+06	1.83336e+06	3.98873e+06				1.9673e+06	3.95287e+06	3.03149e+06	1
Q9Y2W1	Thyroid hormone receptor-associated protein 3 OS=Homo sapiens OX=9606 GN=THRAP3 PE=1 SV=2	0	82.049	18	18	378	17	955	108.6	10.15	185.95	18	0	0.844	1.173	0.865603	0.731304	25.79	27.75	99.9	112.3	87.8	5.8	10.67	15.6	2.02027e+07	1.94641e+07	1.924e+07	2.2436e+07	1.97683e+07	1.9338e+07	1.1034e+07	7.15303e+06	1.01999e+07	2.02027e+07	2.01221e+07	2.22568e+07	2.61348e+07	2.27112e+07	2.12831e+07	1.67972e+07	2.23266e+07	1.77464e+07	1
O00443	Phosphatidylinositol 4-phosphate 3-kinase C2 domain-containing subunit alpha OS=Homo sapiens OX=9606 GN=PIK3C2A PE=1 SV=2	0	82.007	17	24	240	24	1686	190.6	8.02	82.18	24	0	1.054	1.046	0.994434	0.954745	20.59	24.08	93.9	109.2	96.9	14.91	22.21	5.34	8.56543e+06	8.3675e+06	9.54259e+06	5.74496e+06	8.90844e+06	9.14442e+06	5.86092e+06	2.62322e+06	5.2024e+06	8.56543e+06	8.65038e+06	1.10389e+07	6.69209e+06	1.02346e+07	1.00642e+07	8.92215e+06	8.18782e+06	9.0515e+06	1
P50454	Serpin H1 OS=Homo sapiens OX=9606 GN=SERPINH1 PE=1 SV=2	0	81.864	42	15	367	15	418	46.4	8.69	137.07	15	0	0.756	0.953	0.708874	0.976815	26.26	30.36	86.6	124	89.4	14.58	8.44	16.95	8.07546e+07	1.01335e+08	7.23906e+07	1.02873e+08	1.20395e+08	1.0898e+08	5.63386e+07	3.65816e+07	4.97323e+07	8.07546e+07	1.04761e+08	8.37415e+07	1.19833e+08	1.38318e+08	1.19942e+08	8.5765e+07	1.14181e+08	8.65277e+07	1
Q5T9A4	ATPase family AAA domain-containing protein 3B OS=Homo sapiens OX=9606 GN=ATAD3B PE=1 SV=1	0	81.833	26	16	556	7	648	72.5	9.2	251.69	16	0	1.914	0.927	0.293403	0.964891	40.44	43.87	128.1	40.3	131.6	15.8	15.61	7.26	1.75627e+07	2.29608e+07	1.99466e+07	5507060	6.31692e+06	7.92131e+06	14445021	8147515	1.36249e+07	1.75627e+07	2.37371e+07	2.30742e+07	6.41497e+06	7.25729e+06	8.71807e+06	2.19898e+07	2.54307e+07	2.37056e+07	1
Q08378	Golgin subfamily A member 3 OS=Homo sapiens OX=9606 GN=GOLGA3 PE=1 SV=2	0	81.784	17	21	83	21	1498	167.3	5.44	28.21	21	0	0.84	0.824	0.862585	0.75042	19.07	22.59	78.1	89.9	131.9	12.69	5.99	13.89	15665118	12481507	1.43209e+07	15260657	17248338	1.63863e+07	1.97189e+07	8.47656e+06	1.30416e+07	15665118	1.29035e+07	1.65664e+07	1.77766e+07	1.9816e+07	1.80345e+07	3.00184e+07	2.64577e+07	2.26907e+07	1
P50570	Dynamin-2 OS=Homo sapiens OX=9606 GN=DNM2 PE=1 SV=2	0	81.51	28	21	294	16	870	98	7.44	102.35	21	3	1.05	2.331	0.992122	1.49397e-06	25.69	21.15	131.1	131.7	37.2	17.8	11.72	14.08	2.94751e+07	4.08532e+07	3.09356e+07	2.60296e+07	3.33073e+07	3.26587e+07	6.67141e+06	2.99832e+06	7.03781e+06	2.94751e+07	4.22343e+07	3.57864e+07	3.03209e+07	3.82656e+07	3.59437e+07	1.0156e+07	9.3586e+06	1.22449e+07	1
Q1KMD3	Heterogeneous nuclear ribonucleoprotein U-like protein 2 OS=Homo sapiens OX=9606 GN=HNRNPUL2 PE=1 SV=1	0	81.442	25	18	274	18	747	85.1	4.91	113.48	18	0	0.922	0.675	0.930685	0.123769	24.98	27.43	84.2	87.2	128.6	15.47	1.5	25.75	1.95716e+07	2.13031e+07	2.29052e+07	1.9341e+07	1.98385e+07	2.10877e+07	1.81228e+07	1.46124e+07	1.9334e+07	1.95716e+07	2.20232e+07	2.64968e+07	2.25296e+07	2.27918e+07	2.32088e+07	2.75885e+07	4.56095e+07	3.36387e+07	1
P35606	Coatomer subunit beta' OS=Homo sapiens OX=9606 GN=COPB2 PE=1 SV=2	0	81.073	24	17	319	17	906	102.4	5.27	141.86	17	0	0.762	0.882	0.714477	0.903222	21.03	22.58	92.3	114.8	93	8.96	6.88	3.76	3.15636e+07	3.65048e+07	3.07543e+07	3.58779e+07	4.16904e+07	4.01921e+07	2.35369e+07	1.12016e+07	2.16255e+07	3.15636e+07	3.77389e+07	3.55767e+07	4.17928e+07	4.78966e+07	4.42347e+07	3.58304e+07	3.49633e+07	3.76256e+07	1
Q9UPN4	Centrosomal protein of 131 kDa OS=Homo sapiens OX=9606 GN=CEP131 PE=1 SV=3	0	81.014	25	24	124	24	1083	122.1	8.69	36.15	24	0	1.179	0.89	0.965964	0.951502	28.31	28.4	101.5	65.4	133.1	24.02	25.22	14.88	5.29791e+06	7.13948e+06	4.09219e+06	2.6892e+06	2.9713e+06	4.47581e+06	4.56474e+06	2.57909e+06	3.43207e+06	5.29791e+06	7.38084e+06	4.73385e+06	3.13255e+06	3.41363e+06	4.926e+06	6.94897e+06	8.05006e+06	5.97136e+06	1
P30101	Protein disulfide-isomerase A3 OS=Homo sapiens OX=9606 GN=PDIA3 PE=1 SV=4	0	80.521	34	16	293	16	505	56.7	6.35	131.03	16	0	0.592	1.01	0.252664	0.992464	25.35	32.68	72.8	146.6	80.6	19.28	7.68	7.56	2.75358e+07	3.80869e+07	25996756	5.20489e+07	4.60116e+07	5.50019e+07	1.92536e+07	1.06633e+07	1.9376e+07	2.75358e+07	3.93745e+07	3.00731e+07	6.06298e+07	5.28612e+07	6.05342e+07	2.93099e+07	3.32832e+07	3.37117e+07	1
P02533	Keratin, type I cytoskeletal 14 OS=Homo sapiens OX=9606 GN=KRT14 PE=1 SV=4	0	80.477	35	18	375	4	472	51.5	5.16	174.58	18	8	3.501	0.904	0.000489906	0.929972	46.15	58.07	134.5	4.4	161.1	34.7	70.73	46.59	2.36743e+07	2.07963e+07	3.40886e+07	660257	201401	1.20891e+06	1.36446e+07	1.62022e+07	1.63052e+07	2.36743e+07	2.14993e+07	3.94337e+07	769109	231383	1.33051e+06	2.07714e+07	5.05717e+07	2.83689e+07	1
Q58FF7	Putative heat shock protein HSP 90-beta-3 OS=Homo sapiens OX=9606 GN=HSP90AB3P PE=5 SV=1	0	80.298	19	18	785	1	597	68.3	4.79	390.63	18	0																															1
Q9Y490	Talin-1 OS=Homo sapiens OX=9606 GN=TLN1 PE=1 SV=3	0	80.249	11	21	138	21	2541	269.6	6.07	38.9	21	0	1.135	1.177	0.976582	0.708542	26.09	41.85	112.9	104.8	82.3	51.4	26.89	13.49	1.10493e+06	3.49437e+06	2.9429e+06	1.85686e+06	2.75127e+06	3.43468e+06	1.75825e+06	654892	1.4263e+06	1.10493e+06	3.6125e+06	3.40435e+06	2.16299e+06	3.16084e+06	3.78015e+06	2.67661e+06	2.0441e+06	2.48158e+06	1
Q96AQ6	Pre-B-cell leukemia transcription factor-interacting protein 1 OS=Homo sapiens OX=9606 GN=PBXIP1 PE=1 SV=1	0	80.225	29	19	260	19	731	80.6	5.33	112.11	19	0	0.602	0.993	0.277607	0.988913	20.82	27.59	73.2	155.7	71.1	22.53	4.88	8.84	1.98079e+07	1.26758e+07	1.24562e+07	2.63073e+07	2.59063e+07	2.97265e+07	8.24814e+06	4.80308e+06	8.05069e+06	1.98079e+07	1.31043e+07	1.44093e+07	3.06444e+07	2.97629e+07	3.27166e+07	1.25563e+07	1.49918e+07	1.40072e+07	1
P78332	RNA-binding protein 6 OS=Homo sapiens OX=9606 GN=RBM6 PE=1 SV=5	0	79.852	23	21	262	20	1123	128.6	6.32	86.62	21	1	1.298	0.881	0.91757	0.944903	33.2	48.4	97	92.7	110.3	30.07	14.73	43.89	5.99772e+06	6.64697e+06	8.99396e+06	5.64201e+06	5.04719e+06	7.05117e+06	5.13589e+06	4.96064e+06	4.32817e+06	5.99772e+06	6.87168e+06	1.04042e+07	6.57217e+06	5.79854e+06	7.76041e+06	7.81843e+06	1.54836e+07	7.53045e+06	1
P33993	DNA replication licensing factor MCM7 OS=Homo sapiens OX=9606 GN=MCM7 PE=1 SV=4	0	79.778	32	19	410	19	719	81.3	6.46	178.46	19	0	0.95	0.775	0.943617	0.519397	20.98	19.81	92.8	91	116.2	7.76	5.3	11.21	2.85638e+07	3.05875e+07	2.88216e+07	2.66279e+07	2.9107e+07	2.74657e+07	2.33805e+07	1.42663e+07	2.27712e+07	2.85638e+07	3.16216e+07	3.33409e+07	3.10179e+07	3.344e+07	3.02283e+07	3.55924e+07	4.45292e+07	3.96189e+07	1
Q9Y5B9	FACT complex subunit SPT16 OS=Homo sapiens OX=9606 GN=SUPT16H PE=1 SV=1	0	79.589	25	21	307	21	1047	119.8	5.66	129.03	21	0	1.36	1.072	0.881989	0.944903	15.81	18.78	122.8	74	103.2	7.1	14.26	11.72	6.38809e+07	7.03586e+07	6.23306e+07	4.63334e+07	3.63726e+07	3.94512e+07	4.1528e+07	1.61303e+07	3.48315e+07	6.38809e+07	7.27372e+07	7.21041e+07	5.3972e+07	4.17872e+07	4.34194e+07	6.32186e+07	5.03471e+07	6.06022e+07	1
Q14C86	GTPase-activating protein and VPS9 domain-containing protein 1 OS=Homo sapiens OX=9606 GN=GAPVD1 PE=1 SV=2	0	79.543	18	20	276	20	1478	164.9	5.22	111.96	20	0	1.102	1.052	0.994469	0.954745	23.04	26.75	111	110.8	78.3	10.58	5.33	32.6	1.74756e+07	2.07484e+07	1.78443e+07	1.76908e+07	1.9521e+07	1.85036e+07	9.56719e+06	7.55011e+06	7.6567e+06	1.74756e+07	2.14498e+07	2.06423e+07	2.06074e+07	2.24269e+07	2.03648e+07	1.45643e+07	2.3566e+07	1.33217e+07	1
Q9P0K7	Ankycorbin OS=Homo sapiens OX=9606 GN=RAI14 PE=1 SV=2	0	79.507	23	18	223	18	980	110	6.21	84.74	18	0	2.067	0.885	0.176921	0.906355	43.23	30.58	117.5	45.7	136.7	24.69	4.66	10.11	2.04795e+07	3.22309e+07	2.17547e+07	7.77564e+06	8.52561e+06	8.95936e+06	1.61383e+07	9.48018e+06	1.68216e+07	2.04795e+07	3.33205e+07	2.51659e+07	9.05755e+06	9.79478e+06	9.86053e+06	2.45676e+07	2.95903e+07	2.92674e+07	1
P02538	Keratin, type II cytoskeletal 6A OS=Homo sapiens OX=9606 GN=KRT6A PE=1 SV=3	0	79.384	25	18	292	5	564	60	8	151.17	18	0	100	0.918	1.5566e-16	0.992464		53.33	141.3		158.7	38.18		33.3	2.69913e+06	1.7734e+06	3.44807e+06				1.29231e+06	1.26642e+06	1.74236e+06	2.69913e+06	1.83336e+06	3.98873e+06				1.9673e+06	3.95287e+06	3.03149e+06	1
P57678	Gem-associated protein 4 OS=Homo sapiens OX=9606 GN=GEMIN4 PE=1 SV=2	0	79.354	20	19	333	19	1058	120	6.04	139.93	19	0	1.569	0.841	0.683713	0.82354	24.52	29.98	99.6	72.9	127.6	13.2	17.52	14.32	2.15706e+07	2.05713e+07	2.30935e+07	1.08131e+07	1.37432e+07	1.63354e+07	1.81575e+07	9.98076e+06	1.34071e+07	2.15706e+07	2.12667e+07	2.67145e+07	1.25958e+07	1.5789e+07	1.79785e+07	2.76415e+07	3.11528e+07	2.33266e+07	1
Q9UHB9	Signal recognition particle subunit SRP68 OS=Homo sapiens OX=9606 GN=SRP68 PE=1 SV=2	0	79.315	31	20	302	20	627	70.7	8.56	132.74	20	0	1.438	1.02	0.821595	0.98203	21.68	24.45	119.4	66.9	113.8	12.41	8.44	5.23	2.93254e+07	3.62542e+07	3.05393e+07	1.69953e+07	1.56013e+07	1.92926e+07	2.23192e+07	9.88694e+06	1.93533e+07	2.93254e+07	3.74798e+07	3.53279e+07	1.97972e+07	1.79238e+07	2.12332e+07	3.39768e+07	3.08599e+07	3.36723e+07	1
Q9Y678	Coatomer subunit gamma-1 OS=Homo sapiens OX=9606 GN=COPG1 PE=1 SV=1	0	79.21	30	17	338	17	874	97.7	5.47	132.96	17	0	0.944	0.947	0.937845	0.971341	19.48	22.47	92	108.8	99.2	13.67	5.67	13.82	3.3954e+07	3.83807e+07	2.6178e+07	3.18523e+07	3.49737e+07	3.76817e+07	2.31284e+07	1.44726e+07	2.10496e+07	3.3954e+07	3.96782e+07	3.02828e+07	3.71035e+07	4.018e+07	4.14719e+07	3.52086e+07	4.51732e+07	3.66235e+07	1
O76094	Signal recognition particle subunit SRP72 OS=Homo sapiens OX=9606 GN=SRP72 PE=1 SV=3	0	79.084	38	18	278	18	671	74.6	9.26	115.2	18	0	1.5	1.018	0.742931	0.983159	24	21.74	112.3	79.9	107.7	11.82	11.16	5.7	3.22011e+07	3.88189e+07	2.92607e+07	1.82086e+07	2.31091e+07	2.18781e+07	2.15142e+07	9.45107e+06	1.86599e+07	3.22011e+07	4.01313e+07	3.38488e+07	2.12105e+07	2.65493e+07	2.40787e+07	3.27514e+07	2.94995e+07	3.24659e+07	1
P09651	Heterogeneous nuclear ribonucleoprotein A1 OS=Homo sapiens OX=9606 GN=HNRNPA1 PE=1 SV=5	0	78.996	50	15	341	14	372	38.7	9.13	141.9	15	1	2.348	1.149	0.0658438	0.837288	29.22	30.16	136.1	56.9	106.9	7.75	4.43	10.61	93143713	1.03342e+08	9.24357e+07	4.07204e+07	3.88837e+07	3.95587e+07	6.53423e+07	2.68821e+07	4.74489e+07	93143713	1.06836e+08	1.0693e+08	4.74337e+07	4.46721e+07	4.35377e+07	9.94715e+07	8.39065e+07	8.2555e+07	1
O15230	Laminin subunit alpha-5 OS=Homo sapiens OX=9606 GN=LAMA5 PE=1 SV=8	0	78.903	7	20	169	20	3695	399.5	7.02	55.56	20	0	0.787	0.811	0.769434	0.774853	17.84	33.74	77.7	123.5	98.8	10.79	7.97	0.24	8.37229e+06	7.03877e+06	5.87591e+06	9.01416e+06	1.07215e+07	1.05045e+07	6.09545e+06	2.96504e+06	5.3074e+06	8.37229e+06	7.27673e+06	6.79726e+06	1.05003e+07	1.23175e+07	1.15611e+07	9.27918e+06	9.25472e+06	9.23419e+06	1
P18124	Large ribosomal subunit protein uL30 OS=Homo sapiens OX=9606 GN=RPL7 PE=1 SV=1	0	78.83	48	13	645	13	248	29.2	10.65	331.23	13	0	1.312	1.059	0.907599	0.954745	26.88	31.96	107.8	88.2	104	3.8	7.55	1.14	256122405	2.52968e+08	2.09875e+08	1.79864e+08	1.91613e+08	1.72127e+08	1.62406e+08	7.75993e+07	1.41904e+08	256122405	2.6152e+08	2.42784e+08	2.09517e+08	2.20137e+08	1.8944e+08	2.47233e+08	2.42209e+08	2.46894e+08	1
Q86VP1	Tax1-binding protein 1 OS=Homo sapiens OX=9606 GN=TAX1BP1 PE=1 SV=2	0	78.636	24	20	402	20	789	90.8	5.43	199.45	20	0	0.916	0.874	0.930685	0.889735	22.03	19.67	93.1	100.9	106	7.69	8.35	2.35	4.64618e+07	5.19493e+07	4.15758e+07	4.47645e+07	4.27519e+07	5.25496e+07	3.5995e+07	1.76426e+07	3.03107e+07	4.64618e+07	5.37056e+07	4.80949e+07	5.21445e+07	4.91161e+07	5.78353e+07	5.47957e+07	5.50676e+07	5.27368e+07	1
P62917	Large ribosomal subunit protein uL2 OS=Homo sapiens OX=9606 GN=RPL8 PE=1 SV=2	0	78.534	37	15	896	15	257	28	11.03	443.25	15	0	1.273	1.137	0.930685	0.860198	27.05	27.85	111	91	98	4.4	9.98	13.18	4.39835e+08	4.43466e+08	3.62926e+08	3.27166e+08	2.72177e+08	3.27502e+08	3.02059e+08	1.14248e+08	2.22989e+08	4.39835e+08	4.58458e+08	4.19833e+08	3.81104e+08	3.12695e+08	3.60443e+08	4.59828e+08	3.56601e+08	3.87972e+08	1
P39023	Large ribosomal subunit protein uL3 OS=Homo sapiens OX=9606 GN=RPL3 PE=1 SV=2	0	78.528	35	14	515	14	403	46.1	10.18	219.95	14	0	1.258	0.953	0.930685	0.976848	22.19	20.92	103.3	82.4	114.3	6.91	12.88	2.59	2.52194e+08	2.80012e+08	2.32417e+08	2.06774e+08	1.86768e+08	1.68842e+08	1.95347e+08	9.28367e+07	1.75393e+08	2.52194e+08	2.89478e+08	2.6886e+08	2.40863e+08	2.14571e+08	1.85825e+08	2.97379e+08	2.8977e+08	3.05161e+08	1
Q9UKK3	Protein mono-ADP-ribosyltransferase PARP4 OS=Homo sapiens OX=9606 GN=PARP4 PE=1 SV=3	0	78.414	14	20	269	20	1724	192.5	5.66	100.28	20	0	0.978	0.66	0.965964	0.108486	19.81	29.9	74	81.9	144.1	22.59	7.05	28.54	1.10368e+07	1.01604e+07	1.34783e+07	1.0479e+07	1.11287e+07	1.0099e+07	1.38256e+07	1.08408e+07	1.23427e+07	1.10368e+07	1.05039e+07	1.55917e+07	1.22066e+07	1.27854e+07	1.11148e+07	2.10469e+07	3.38373e+07	2.14747e+07	1
Q8N1F7	Nuclear pore complex protein Nup93 OS=Homo sapiens OX=9606 GN=NUP93 PE=1 SV=2	0	78.404	33	22	439	22	819	93.4	5.72	196.7	22	0	0.913	0.935	0.930685	0.958844	24.14	34.58	99.7	127	73.4	5.61	6.07	13.18	7.86542e+07	6.81918e+07	6.32529e+07	8.14377e+07	7.36281e+07	8.46936e+07	4.40934e+07	1.72632e+07	3.09043e+07	7.86542e+07	7.04971e+07	7.3171e+07	9.48638e+07	8.45888e+07	9.32125e+07	6.71239e+07	5.38833e+07	5.37695e+07	1
Q9NRH3	Tubulin gamma-2 chain OS=Homo sapiens OX=9606 GN=TUBG2 PE=2 SV=1	0	78.398	40	16	309	16	451	51.1	5.8	102.09	16	0	1.264	0.795	0.930685	0.61149	23.36	25.33	101.2	78.4	120.3	4.33	4.05	8.88	3.33877e+07	34889787	3.10983e+07	25454136	2.42707e+07	2.49838e+07	2.79976e+07	1.58987e+07	2.45877e+07	3.33877e+07	3.60693e+07	3.59746e+07	2.96506e+07	2.78838e+07	2.74968e+07	4.26212e+07	4.96244e+07	4.27795e+07	1
P46781	Small ribosomal subunit protein uS4 OS=Homo sapiens OX=9606 GN=RPS9 PE=1 SV=3	0	78.379	59	16	1332	16	194	22.6	10.65	704.99	16	0	1.309	1.132	0.908111	0.865039	17.26	22.34	113.6	85.3	101.1	0.61	1.76	3.68	7.84105e+08	7.63975e+08	6.86093e+08	5.19175e+08	5.08271e+08	5.38986e+08	4.61492e+08	2.34738e+08	3.91408e+08	7.84105e+08	7.89802e+08	7.93673e+08	6.04767e+08	5.83934e+08	5.93199e+08	7.02535e+08	7.32684e+08	6.81e+08	1
Q9Y608	Leucine-rich repeat flightless-interacting protein 2 OS=Homo sapiens OX=9606 GN=LRRFIP2 PE=1 SV=1	0	78.357	22	16	354	16	721	82.1	6.95	176.13	16	0	0.88	1.142	0.905797	0.856928	21.33	32.91	97.9	115.8	86.3	7.14	4.4	23.79	7.96031e+07	8.64083e+07	6.80287e+07	8.11831e+07	7.60534e+07	85596556	5.07558e+07	1.52641e+07	4.03502e+07	7.96031e+07	8.93295e+07	7.86957e+07	9.45672e+07	8.73751e+07	9.42062e+07	7.72662e+07	4.76436e+07	7.02042e+07	1
P52597	Heterogeneous nuclear ribonucleoprotein F OS=Homo sapiens OX=9606 GN=HNRNPF PE=1 SV=3	0	77.843	31	9	747	7	415	45.6	5.58	319.88	9	0	1.023	0.513	0.976582	0.000784074	27.93	41.43	86.8	79.2	134	15.69	12.07	36.13	1.67609e+08	1.91249e+08	1.98685e+08	154949008	1.86643e+08	1.55508e+08	1.53224e+08	1.50666e+08	1.75469e+08	1.67609e+08	1.97715e+08	2.29839e+08	1.80494e+08	2.14428e+08	1.7115e+08	2.33254e+08	4.70271e+08	3.05293e+08	1
Q6PEY2	Tubulin alpha-3E chain OS=Homo sapiens OX=9606 GN=TUBA3E PE=1 SV=2	0	77.81	32	11	821	0	450	49.8	5.14	420.55	11	0	1.004	0.729	0.966249	0.296542	24.37	23.72	94.9	91	114.2	6.69	3.97	12.68	7.83496e+08	8.26066e+08	7.73774e+08	668179956	7.33025e+08	7.44077e+08	6.67075e+08	4.04785e+08	5.9072e+08	7.83496e+08	8.53993e+08	8.95102e+08	7.78338e+08	8.42147e+08	8.1892e+08	1.0155e+09	1.26345e+09	1.02778e+09	1
Q09666	Neuroblast differentiation-associated protein AHNAK OS=Homo sapiens OX=9606 GN=AHNAK PE=1 SV=2	0	77.749	8	21	177	21	5890	628.7	6.15	61.5	21	0	1.031	1.004	0.978238	0.983159	39.02	24.15	133	48.7	118.3	11.09	18.74	3.76	1.58552e+07	1.69258e+07	1.7088e+07	4.92628e+06	5.57093e+06	7.44471e+06	9.61456e+06	4.98568e+06	9.01743e+06	1.58552e+07	1.7498e+07	1.97674e+07	5.73844e+06	6.40025e+06	8.19354e+06	1.46364e+07	1.55617e+07	1.56892e+07	1
Q13772	Nuclear receptor coactivator 4 OS=Homo sapiens OX=9606 GN=NCOA4 PE=1 SV=1	0	77.591	32	14	359	14	614	69.7	6.01	185.36	14	0	1.11	0.985	0.990879	0.995855	25.03	30.43	96.8	91.4	111.9	7.69	2.52	9.93	6.71387e+07	7.56305e+07	6.18604e+07	5.65347e+07	5.88185e+07	6.29357e+07	4.67584e+07	2.76925e+07	4.75432e+07	6.71387e+07	7.81873e+07	7.15602e+07	6.58552e+07	6.75745e+07	6.9266e+07	7.1181e+07	8.6436e+07	8.2719e+07	1
P62906	Large ribosomal subunit protein uL1 OS=Homo sapiens OX=9606 GN=RPL10A PE=1 SV=2	0	77.578	47	13	780	13	217	24.8	9.94	340.53	13	0	1.45	1.182	0.806557	0.75042	23.6	29.92	116.9	84.7	98.4	3.29	2.39	6.87	6.49031e+08	5.87931e+08	5.467e+08	3.9502e+08	3.99065e+08	4.0034e+08	3.49864e+08	1.61507e+08	3.31898e+08	6.49031e+08	6.07807e+08	6.32423e+08	4.60145e+08	4.58472e+08	4.40608e+08	5.32603e+08	5.0411e+08	5.7746e+08	1
O75676	Ribosomal protein S6 kinase alpha-4 OS=Homo sapiens OX=9606 GN=RPS6KA4 PE=1 SV=1	0	77.369	27	17	201	17	772	85.6	8.28	78.29	17	0	1.404	1.04	0.851935	0.954745	26.16	21.39	116.4	78.4	105.2	12.82	19.37	8.49	1.45996e+07	1.75422e+07	1.26675e+07	5.95731e+06	8.70513e+06	8.96655e+06	8705565	4.15371e+06	8.68987e+06	1.45996e+07	1.81352e+07	1.46538e+07	6.93944e+06	1.0001e+07	9.86845e+06	1.32526e+07	1.29649e+07	1.51193e+07	1
O43823	A-kinase anchor protein 8 OS=Homo sapiens OX=9606 GN=AKAP8 PE=1 SV=1	0	77.328	33	18	333	18	692	76.1	5.15	132.72	18	0	0.758	0.62	0.712729	0.0380719	26.67	30.67	72.4	95.1	132.5	17.83	14.85	27.05	3.67099e+07	3.61391e+07	4.30241e+07	4.2107e+07	39545388	5.46242e+07	4.49141e+07	3.05381e+07	3.25166e+07	3.67099e+07	3.73608e+07	4.97703e+07	4.90488e+07	4.54323e+07	6.01186e+07	6.83733e+07	9.5318e+07	5.65746e+07	1
P49588	Alanine--tRNA ligase, cytoplasmic OS=Homo sapiens OX=9606 GN=AARS1 PE=1 SV=2	0	77.068	23	17	341	17	968	106.7	5.53	175.59	17	0	1.163	0.986	0.965964	0.998303	27.79	21.9	110.8	85.7	103.5	14.32	5.94	1.75	5.02258e+07	6.3578e+07	4.65534e+07	3.52205e+07	3.62673e+07	4.15374e+07	3.30456e+07	1.57377e+07	2.92163e+07	5.02258e+07	6.57273e+07	5.3853e+07	4.10271e+07	4.16662e+07	4.57154e+07	5.03057e+07	4.91218e+07	5.08326e+07	1
O15269	Serine palmitoyltransferase 1 OS=Homo sapiens OX=9606 GN=SPTLC1 PE=1 SV=1	0	77.008	44	17	419	17	473	52.7	6.01	226.49	17	0	1.335	0.969	0.896664	0.991756	22.03	30.94	110.5	80	109.6	2.6	16.1	8.69	8.32952e+07	7.89194e+07	6.83756e+07	5.0686e+07	6.10882e+07	4.62726e+07	5.98413e+07	2.47137e+07	4.65073e+07	8.32952e+07	8.15875e+07	7.9097e+07	5.90422e+07	7.01821e+07	5.09269e+07	9.10972e+07	7.71386e+07	8.09167e+07	1
Q15021	Condensin complex subunit 1 OS=Homo sapiens OX=9606 GN=NCAPD2 PE=1 SV=3	0	76.886	19	20	210	20	1401	157.1	6.61	73.43	20	0	1.233	1.066	0.937845	0.929972	27.05	33.18	115.2	89.7	95.2	11.77	17.98	8.58	2.06647e+07	1.85492e+07	2.08063e+07	1.65031e+07	1.4003e+07	1.21671e+07	1.18654e+07	4878106	9.81783e+06	2.06647e+07	1.91763e+07	2.40688e+07	1.92238e+07	1.60875e+07	1.33909e+07	1.80629e+07	1.52259e+07	1.70817e+07	1
P10809	60 kDa heat shock protein, mitochondrial OS=Homo sapiens OX=9606 GN=HSPD1 PE=1 SV=2	0	76.697	35	17	306	17	573	61	5.87	104.47	17	0	1.383	1.023	0.862585	0.980177	21.72	32.27	119.6	77.2	103.1	32.72	9.73	25.86	2.40347e+07	4.4898e+07	3.92225e+07	2.14015e+07	2.60744e+07	2.66162e+07	1.72876e+07	1.43859e+07	2.2475e+07	2.40347e+07	4.64159e+07	4.53726e+07	2.49298e+07	2.9956e+07	2.92934e+07	2.63171e+07	4.49023e+07	3.91036e+07	1
P08651	Nuclear factor 1 C-type OS=Homo sapiens OX=9606 GN=NFIC PE=1 SV=2	0	76.66	44	17	248	14	508	55.6	8.38	103.34	17	3	1.638	0.767	0.605324	0.479422	29.37	42.79	101.1	57.1	141.8	15.41	5.09	26.89	4.93746e+07	4.32914e+07	5.20358e+07	2.59937e+07	2.42494e+07	2.5137e+07	4.0781e+07	3.24353e+07	3.9808e+07	4.93746e+07	4.47549e+07	6.0195e+07	3.02791e+07	2.78593e+07	2.76654e+07	6.20814e+07	1.0124e+08	6.92607e+07	1
O00567	Nucleolar protein 56 OS=Homo sapiens OX=9606 GN=NOP56 PE=1 SV=4	0	76.634	36	19	280	19	594	66	9.19	117.4	19	0	1.477	1.101	0.770057	0.908189	19.15	18.15	116.9	71.2	111.9	4.65	3.58	2.79	3.8073e+07	3.60494e+07	3.519e+07	1.92151e+07	2.09288e+07	2.10625e+07	2.41248e+07	1.16669e+07	2.00324e+07	3.8073e+07	3.72681e+07	4.07078e+07	2.23829e+07	2.40443e+07	2.31811e+07	3.67255e+07	3.64156e+07	3.48538e+07	1
Q9P2J5	Leucine--tRNA ligase, cytoplasmic OS=Homo sapiens OX=9606 GN=LARS1 PE=1 SV=2	0	76.572	18	19	277	19	1176	134.4	7.3	133.82	19	0	1.394	0.751	0.859937	0.400672	24.61	23.11	95.3	70.4	134.3	9	2.69	17.27	39700816	4.19749e+07	4.10894e+07	2.62603e+07	2.78783e+07	2.91604e+07	3.90912e+07	2.57246e+07	3.51223e+07	39700816	4.3394e+07	4.75323e+07	3.05896e+07	3.20284e+07	3.20935e+07	5.9509e+07	8.02938e+07	6.11083e+07	1
P01130	Low-density lipoprotein receptor OS=Homo sapiens OX=9606 GN=LDLR PE=1 SV=1	0	76.448	33	18	300	18	860	95.3	5.05	127.52	18	0	0.848	0.845	0.877845	0.816504	28.45	35.61	97	109.4	93.6	12.66	5.36	7.44	2.51515e+07	2.01178e+07	2.30944e+07	2.27287e+07	2.56392e+07	2.57653e+07	1.59433e+07	8.5975e+06	1.33685e+07	2.51515e+07	2.0798e+07	2.67157e+07	2.64758e+07	2.9456e+07	2.83569e+07	2.42707e+07	2.68352e+07	2.32594e+07	1
P62495	Eukaryotic peptide chain release factor subunit 1 OS=Homo sapiens OX=9606 GN=ETF1 PE=1 SV=3	0	76.437	48	17	247	17	437	49	5.71	107.97	17	0	1.29	0.663	0.926739	0.0982672	34.64	43.37	93.3	74.2	132.5	21.73	11.25	26.67	4.37031e+07	5.03866e+07	5.79023e+07	3.17999e+07	4.0388e+07	3.76438e+07	4.10436e+07	3.32704e+07	4.25005e+07	4.37031e+07	5.209e+07	6.69815e+07	3.70425e+07	4.64003e+07	4.14302e+07	6.24812e+07	1.03846e+08	7.39454e+07	1
O95714	E3 ubiquitin-protein ligase HERC2 OS=Homo sapiens OX=9606 GN=HERC2 PE=1 SV=2	0	76.387	6	23	163	23	4834	526.9	6.28	43.65	23	0	1.061	0.773	0.995177	0.812188	20.46	42.06	105	71.1	123.9	1.33	48.38	21.52	2.38887e+06	2.37264e+06	2.08913e+06	1.40475e+06	2.1015e+06	761148	1.87241e+06	1.26463e+06	1.55113e+06	2.38887e+06	2.45286e+06	2.4167e+06	1.63634e+06	2.41434e+06	837707	2.85039e+06	3.94728e+06	2.69877e+06	1
Q14258	E3 ubiquitin/ISG15 ligase TRIM25 OS=Homo sapiens OX=9606 GN=TRIM25 PE=1 SV=2	0	76.187	30	16	320	16	630	70.9	8.09	118.56	16	0	2.067	0.808	0.176921	0.677463	26.36	33.08	116.5	55.3	128.2	9.1	12.23	10.56	4.79894e+07	5.02063e+07	4.96982e+07	1.7468e+07	2.24969e+07	2.23804e+07	3.3024e+07	1.99146e+07	3.28111e+07	4.79894e+07	5.19036e+07	5.74909e+07	2.03478e+07	2.5846e+07	2.46316e+07	5.02728e+07	6.21591e+07	5.70871e+07	1
O94906	Pre-mRNA-processing factor 6 OS=Homo sapiens OX=9606 GN=PRPF6 PE=1 SV=1	0	76.045	21	18	365	18	941	106.9	8.25	171.51	18	0	1.304	1.092	0.911399	0.920599	19.99	25.5	113.6	87.5	98.9	5.12	12.53	26.11	2.86213e+07	2.90558e+07	2.74061e+07	1.98679e+07	1.66009e+07	2.21608e+07	1.79327e+07	5.20955e+06	1.50271e+07	2.86213e+07	3.00381e+07	3.17034e+07	2.31434e+07	1.90723e+07	2.43899e+07	2.72992e+07	1.62605e+07	2.61452e+07	1
Q8WXH0	Nesprin-2 OS=Homo sapiens OX=9606 GN=SYNE2 PE=1 SV=3	0	75.931	5	24	197	24	6885	795.9	5.36	58.64	24	0	0.929	0.707	0.932471	0.357986	30.53	31.35	80.7	92.1	127.2	23.14	4.01	22.72	4.97625e+06	6.44988e+06	6.91503e+06	6.30905e+06	6.92865e+06	6.91755e+06	5.11813e+06	3.97934e+06	6.0436e+06	4.97625e+06	6.66793e+06	7.99932e+06	7.34918e+06	7.96009e+06	7.61335e+06	7.7914e+06	1.24206e+07	1.05151e+07	1
P51532	Transcription activator BRG1 OS=Homo sapiens OX=9606 GN=SMARCA4 PE=1 SV=2	0	75.719	14	20	224	20	1647	184.5	7.88	92.12	20	0	1.483	0.884	0.761405	0.929972	22.11	22.49	112.8	53.2	134	11.36	15.13	10.02	9.62786e+06	7.52564e+06	8.16087e+06	3.31874e+06	3.87803e+06	4.75101e+06	7.82268e+06	3.12593e+06	6.44511e+06	9.62786e+06	7.78005e+06	9.4405e+06	3.86588e+06	4.45534e+06	5.22889e+06	1.19086e+07	9.75691e+06	1.12137e+07	1
Q14160	Protein scribble homolog OS=Homo sapiens OX=9606 GN=SCRIB PE=1 SV=5	0	75.38	16	19	223	19	1630	174.8	5.07	83.14	19	0	0.996	0.631	0.965964	0.0573087	17.5	32.48	77.4	84.4	138.2	15.38	19.26	18.63	1.19113e+07	1.1028e+07	1.29938e+07	1.01753e+07	1.47611e+07	1.17931e+07	1.39716e+07	9.22584e+06	1.20909e+07	1.19113e+07	1.14008e+07	1.50312e+07	1.18529e+07	1.69585e+07	1.29793e+07	2.12692e+07	2.87964e+07	2.10367e+07	1
O15031	Plexin-B2 OS=Homo sapiens OX=9606 GN=PLXNB2 PE=1 SV=3	0	75.279	13	19	243	19	1838	205	6.24	90.86	19	0	0.636	1.044	0.379913	0.954745	20.39	20.42	83.4	133	83.6	4.38	7.51	27.62	1.56132e+07	1.45013e+07	12364663	1.87495e+07	2.08078e+07	2.3065e+07	10484454	2.92944e+06	8.63149e+06	1.56132e+07	1.49916e+07	1.43035e+07	2.18406e+07	2.39054e+07	2.5385e+07	1.59606e+07	9.14362e+06	1.50177e+07	1
Q9UHI6	Probable ATP-dependent RNA helicase DDX20 OS=Homo sapiens OX=9606 GN=DDX20 PE=1 SV=2	0	75.076	25	15	230	15	824	92.2	6.95	87.19	15	0	1.83	0.877	0.379913	0.899876	21.26	24.02	115.4	56.7	127.9	1.19	1.8	8.29	3.29871e+07	3.18532e+07	2.79092e+07	1.38846e+07	1.36968e+07	1.47927e+07	23970706	1.25916e+07	19128409	3.29871e+07	3.293e+07	3.22854e+07	1.61737e+07	1.57358e+07	1.62806e+07	3.64909e+07	3.9302e+07	3.3281e+07	1
O76021	Ribosomal L1 domain-containing protein 1 OS=Homo sapiens OX=9606 GN=RSL1D1 PE=1 SV=3	0	75.054	35	18	357	18	490	54.9	10.13	158	18	0	1.062	1.172	0.995177	0.774853	25.47	22.56	110.8	103.5	85.7	6.13	8.71	6.94	3.86826e+07	4.08684e+07	3.25234e+07	3.5635e+07	3.0955e+07	3.2812e+07	1.78774e+07	9.58688e+06	1.79437e+07	3.86826e+07	4.22501e+07	3.76231e+07	4.151e+07	3.55631e+07	3.61124e+07	2.7215e+07	2.99234e+07	3.12197e+07	1
Q96I24	Far upstream element-binding protein 3 OS=Homo sapiens OX=9606 GN=FUBP3 PE=1 SV=2	0	75.053	40	17	217	16	572	61.6	8.38	84.2	17	0	1.604	1.041	0.643005	0.966179	19.98	19.74	115.3	65.8	118.9	17.2	10.28	13.95	3.00286e+07	3.35288e+07	3.64557e+07	2.00752e+07	1.72101e+07	1.7774e+07	2.34854e+07	1.44279e+07	2.04469e+07	3.00286e+07	3.46623e+07	4.2172e+07	2.33848e+07	1.9772e+07	1.95618e+07	3.57522e+07	4.50336e+07	3.55749e+07	1
Q9UPQ9	Trinucleotide repeat-containing gene 6B protein OS=Homo sapiens OX=9606 GN=TNRC6B PE=1 SV=4	0	74.963	13	17	132	17	1833	193.9	6.76	48.99	17	0	1.618	0.524	0.636095	0.00242178	41.5	36.12	83.8	45	171.2	35.34	22.23	34.05	8.34674e+06	7.41198e+06	1.22101e+07	3.07779e+06	3.90246e+06	5.09518e+06	1.10922e+07	9.42913e+06	9.80622e+06	8.34674e+06	7.66256e+06	1.41247e+07	3.58521e+06	4.48341e+06	5.60768e+06	1.68858e+07	2.9431e+07	1.70615e+07	1
Q8NE71	ATP-binding cassette sub-family F member 1 OS=Homo sapiens OX=9606 GN=ABCF1 PE=1 SV=2	0	74.823	27	19	321	18	845	95.9	6.8	146.37	19	0	1.267	1.026	0.930685	0.978581	17.79	21.53	102.8	90.9	106.3	6.53	10.27	4.43	3.49491e+07	3.81742e+07	3.09565e+07	2.71625e+07	3.03737e+07	25799712	2.27018e+07	1.20442e+07	2.12828e+07	3.49491e+07	3.94647e+07	3.58105e+07	3.16406e+07	3.48952e+07	2.83948e+07	3.45593e+07	3.75935e+07	3.70294e+07	1
P30291	Wee1-like protein kinase OS=Homo sapiens OX=9606 GN=WEE1 PE=1 SV=2	0	74.6	26	14	257	14	646	71.6	6.77	91.51	14	0	2.791	0.537	0.0101799	0.00233918	20.37	37.3	106.1	28.4	165.5	13.54	14.22	28.9	3.35905e+07	3.67273e+07	3.80174e+07	8.73021e+06	1.09353e+07	8.80876e+06	3.489e+07	2.86451e+07	3.40356e+07	3.35905e+07	3.79689e+07	4.39786e+07	1.01695e+07	1.25631e+07	9.69478e+06	5.31134e+07	8.94095e+07	5.92176e+07	1
P09543	2',3'-cyclic-nucleotide 3'-phosphodiesterase OS=Homo sapiens OX=9606 GN=CNP PE=1 SV=2	0	74.585	46	18	202	18	421	47.5	9.07	76.32	18	0	0.838	1.008	0.862585	0.992464	22.23	18.86	96.3	123.5	80.2	15	3.92	7.95	3.6226e+07	4.17039e+07	2.7738e+07	3.99024e+07	3.90177e+07	4.4043e+07	2.13622e+07	8.88313e+06	17340797	3.6226e+07	4.31138e+07	3.20873e+07	4.64808e+07	4.48261e+07	4.8473e+07	3.25199e+07	2.77268e+07	3.01707e+07	1
P39019	Small ribosomal subunit protein eS19 OS=Homo sapiens OX=9606 GN=RPS19 PE=1 SV=2	0	74.116	63	14	799	14	145	16.1	10.32	380.88	14	0	1.569	1.202	0.683713	0.698293	19.71	21.78	118.5	75.5	106	3.94	4.01	5.21	4.32756e+08	4.52314e+08	3.84916e+08	2.60028e+08	2.45379e+08	2.57877e+08	2.66466e+08	1.27649e+08	2.11137e+08	4.32756e+08	4.67605e+08	4.45271e+08	3.02898e+08	2.81908e+08	2.83816e+08	4.05644e+08	3.9843e+08	3.67352e+08	1
Q8WX93	Palladin OS=Homo sapiens OX=9606 GN=PALLD PE=1 SV=3	0	74.1	12	18	224	18	1383	150.5	7.09	90.71	18	0	1.067	0.49	0.99661	0.000808026	29.78	32.02	84.6	67.2	148.2	14.71	13.05	40.25	9.29098e+06	9788218	1.06341e+07	5.76982e+06	7.60204e+06	7.29887e+06	1.09267e+07	1.04919e+07	1.01915e+07	9.29098e+06	1.01191e+07	1.23016e+07	6.72105e+06	8.73371e+06	8.03302e+06	1.66339e+07	3.27483e+07	1.77319e+07	1
A5A3E0	POTE ankyrin domain family member F OS=Homo sapiens OX=9606 GN=POTEF PE=1 SV=2	0	73.849	6	6	1634	0	1075	121.4	6.2	806.3	6	0	0.825	0.966	0.846334	0.986757	17.47	19.6	88.4	116.2	95.4	3.82	6.98	13.79	4.64247e+09	4.76847e+09	3.9739e+09	5.2394e+09	4.71348e+09	5.58599e+09	3.59441e+09	1.32883e+09	2.88127e+09	4.64247e+09	4.92968e+09	4.59702e+09	6.10318e+09	5.41515e+09	6.14785e+09	5.47182e+09	4.14766e+09	5.01304e+09	1
Q9H6S0	3'-5' RNA helicase YTHDC2 OS=Homo sapiens OX=9606 GN=YTHDC2 PE=1 SV=2	0	73.683	17	20	288	20	1430	160.1	8.4	101.43	20	0	1.185	1.046	0.965964	0.954745	15.24	15.21	105.6	86.6	107.8	14.52	8.78	9.54	2.01199e+07	1.99569e+07	2.24314e+07	1.25717e+07	1.50379e+07	1.53772e+07	1.42854e+07	6.74827e+06	1.04053e+07	2.01199e+07	2.06316e+07	2.59486e+07	1.46443e+07	1.72766e+07	1.69239e+07	2.17468e+07	2.10633e+07	1.81038e+07	1
P04843	Dolichyl-diphosphooligosaccharide--protein glycosyltransferase subunit 1 OS=Homo sapiens OX=9606 GN=RPN1 PE=1 SV=1	0	73.368	38	17	412	17	607	68.5	6.38	185.35	17	0	0.676	0.943	0.497682	0.969162	31.32	27.64	84.7	130.1	85.2	6.52	3.65	6.51	5.42294e+07	5.90772e+07	5.23813e+07	7.88956e+07	8.10464e+07	8.93899e+07	3.61785e+07	1.95305e+07	3.58527e+07	5.42294e+07	6.10744e+07	6.05947e+07	9.19026e+07	9.31114e+07	9.83812e+07	5.5075e+07	6.09601e+07	6.23791e+07	1
P17812	CTP synthase 1 OS=Homo sapiens OX=9606 GN=CTPS1 PE=1 SV=2	0	73.226	29	17	334	15	591	66.6	6.46	154.47	17	2	0.89	0.915	0.908111	0.946893	20.4	21.28	97.6	103.5	98.9	14.49	8.79	9.7	3.99685e+07	5.04688e+07	4.48137e+07	4.15538e+07	5.00854e+07	4.9962e+07	3.13812e+07	1.85831e+07	3.021e+07	3.99685e+07	5.2175e+07	5.18406e+07	4.84045e+07	5.75414e+07	5.49874e+07	4.77719e+07	5.80031e+07	5.25616e+07	1
P0CG38	POTE ankyrin domain family member I OS=Homo sapiens OX=9606 GN=POTEI PE=3 SV=1	0	73.147	8	7	1628	1	1075	121.2	6.21	791.67	7	0																															1
Q14694	Ubiquitin carboxyl-terminal hydrolase 10 OS=Homo sapiens OX=9606 GN=USP10 PE=1 SV=2	0	73.136	27	14	334	14	798	87.1	5.31	150.23	14	0	2.245	1.002	0.0948724	0.994006	26.29	30.63	129.3	49.6	121.1	14.73	3.69	14.69	59570380	7.41236e+07	6.81826e+07	2.59848e+07	2.55608e+07	2.55499e+07	4.08523e+07	2.67347e+07	4.12565e+07	59570380	7.66295e+07	7.88737e+07	3.02687e+07	2.9366e+07	2.81199e+07	6.219e+07	8.34466e+07	7.1781e+07	1
P46459	Vesicle-fusing ATPase OS=Homo sapiens OX=9606 GN=NSF PE=1 SV=3	0	72.822	25	17	270	17	744	82.5	6.95	111.47	17	0	0.907	0.89	0.930356	0.908189	23.77	25.1	93.6	95.9	110.5	14.29	5.71	5.97	3.33799e+07	3.65523e+07	3.83096e+07	3.32577e+07	3.70781e+07	3.50365e+07	2.92992e+07	1.31208e+07	2.64589e+07	3.33799e+07	3.7788e+07	4.43166e+07	3.87407e+07	4.25978e+07	3.85606e+07	4.46026e+07	4.09537e+07	4.6035e+07	1
P61978	Heterogeneous nuclear ribonucleoprotein K OS=Homo sapiens OX=9606 GN=HNRNPK PE=1 SV=1	0	72.65	38	16	1265	16	463	50.9	5.54	583.27	16	0	1.038	0.553	0.985529	0.00434013	31.24	41.51	81.3	79.5	139.2	19.74	11.38	40.2	2.94442e+08	3.23897e+08	3.71927e+08	2.47765e+08	3.15865e+08	2.97733e+08	3.7363e+08	3.48823e+08	329482957	2.94442e+08	3.34847e+08	4.30245e+08	2.88612e+08	3.62887e+08	3.2768e+08	5.68782e+08	1.08877e+09	5.73258e+08	1
P27797	Calreticulin OS=Homo sapiens OX=9606 GN=CALR PE=1 SV=1	0	72.6	40	13	396	13	417	48.1	4.44	202.24	13	0	0.709	0.995	0.604033	0.995663	22.12	23.16	90.3	125.5	84.2	13.2	1.12	13.13	5.98405e+07	7.38091e+07	6.53736e+07	9.06316e+07	9.15236e+07	9.39239e+07	3.7241e+07	2.33613e+07	4.05334e+07	5.98405e+07	7.63043e+07	7.56243e+07	1.05573e+08	1.05148e+08	1.03371e+08	5.66924e+07	7.29171e+07	7.05228e+07	1
Q13283	Ras GTPase-activating protein-binding protein 1 OS=Homo sapiens OX=9606 GN=G3BP1 PE=1 SV=1	0	72.417	52	15	502	14	466	52.1	5.52	196.53	15	1	3.954	1.228	7.39336e-05	0.621504	32.03	31.79	154.8	34.7	110.5	14.61	3.15	4.85	1.11119e+08	1.41773e+08	1.23598e+08	2.86546e+07	2.73142e+07	2.91204e+07	7.12071e+07	3.15665e+07	5.86841e+07	1.11119e+08	1.46566e+08	1.42978e+08	3.33787e+07	3.13803e+07	3.20495e+07	1.084e+08	9.8528e+07	1.02103e+08	1
Q9H089	Large subunit GTPase 1 homolog OS=Homo sapiens OX=9606 GN=LSG1 PE=1 SV=2	0	72.407	30	17	351	17	658	75.2	6.38	141.25	17	0	1.631	0.757	0.614059	0.430724	19.79	22.27	99	65.4	135.7	9.73	7.61	33.9	3.55147e+07	3.55988e+07	3.67527e+07	1.82778e+07	2.11643e+07	2.2188e+07	2.88182e+07	2.595e+07	2.89977e+07	3.55147e+07	3.68023e+07	4.25156e+07	2.12911e+07	2.43149e+07	2.44198e+07	4.38703e+07	8.09972e+07	5.04522e+07	1
Q9BZF9	Uveal autoantigen with coiled-coil domains and ankyrin repeats OS=Homo sapiens OX=9606 GN=UACA PE=1 SV=2	0	72.267	17	20	226	20	1416	162.4	7.03	96.91	20	0	1.595	0.907	0.655018	0.954745	30.01	27.37	126.5	57.7	115.7	16.02	13.51	2.51	1.428e+07	1.86209e+07	1.64468e+07	6.04e+06	7.55496e+06	8.33864e+06	1.1433e+07	5.52414e+06	1.03889e+07	1.428e+07	1.92504e+07	1.90257e+07	7.03577e+06	8.67963e+06	9.17737e+06	1.74046e+07	1.72424e+07	1.80753e+07	1
Q5T1M5	FK506-binding protein 15 OS=Homo sapiens OX=9606 GN=FKBP15 PE=1 SV=2	0	72.166	22	16	185	16	1219	133.5	5.2	77.76	16	0	0.796	0.909	0.797326	0.954745	27.02	22.68	93.9	110.7	95.4	15.76	21.98	11.68	1.03051e+07	1.13122e+07	1.21471e+07	1.678e+07	1.17091e+07	1.25229e+07	7.5388e+06	4.5448e+06	6.82948e+06	1.03051e+07	1.16946e+07	1.40518e+07	1.95464e+07	1.34522e+07	1.37825e+07	1.14764e+07	1.41856e+07	1.18824e+07	1
Q16891	MICOS complex subunit MIC60 OS=Homo sapiens OX=9606 GN=IMMT PE=1 SV=1	0	72.157	25	16	229	16	758	83.6	6.48	96.87	16	0	0.547	0.919	0.144872	0.954745	25.35	27.92	84.5	142.2	73.3	11.4	9.91	10.47	1.83873e+07	2.1995e+07	1.93363e+07	31278874	3.27589e+07	3.97009e+07	1.30857e+07	6.21205e+06	9.38215e+06	1.83873e+07	2.27385e+07	2.23683e+07	3.64356e+07	3.76356e+07	4.36942e+07	1.99205e+07	1.93896e+07	1.63237e+07	1
Q9Y383	Putative RNA-binding protein Luc7-like 2 OS=Homo sapiens OX=9606 GN=LUC7L2 PE=1 SV=2	0	72.146	33	14	299	8	392	46.5	10.01	129.42	14	5	1.432	1.115	0.830239	0.900469	29.24	26.34	119.8	83.1	97.2	7.13	16.39	14.87	3.60811e+07	3.8165e+07	3.59676e+07	2.60295e+07	2.38214e+07	1.97817e+07	2.10243e+07	1.29452e+07	1.78777e+07	3.60811e+07	3.94552e+07	4.16074e+07	3.03208e+07	2.73676e+07	2.17714e+07	3.20056e+07	4.04056e+07	3.11048e+07	1
O00411	DNA-directed RNA polymerase, mitochondrial OS=Homo sapiens OX=9606 GN=POLRMT PE=1 SV=2	0	72.111	24	17	152	17	1230	138.5	8.98	52.58	17	0	0.864	0.953	0.888573	0.992464	18.92	24.14	93.5	122	84.5	5.96	14.08	7.44	1.1856e+07	1.27897e+07	1.13352e+07	1.14254e+07	1.5024e+07	1.55374e+07	7.77874e+06	4.21948e+06	6.57807e+06	1.1856e+07	1.32221e+07	1.31126e+07	1.3309e+07	1.72605e+07	1.71002e+07	1.18417e+07	1.31702e+07	1.1445e+07	1
Q86XI2	Condensin-2 complex subunit G2 OS=Homo sapiens OX=9606 GN=NCAPG2 PE=1 SV=1	0	71.929	18	19	272	19	1143	130.9	6.87	99.05	19	0	1.62	1.143	0.632415	0.806485	22.74	18.3	139.1	65.4	95.5	6.31	25.64	2.37	2.38511e+07	2.19593e+07	2.22271e+07	9.62978e+06	6.85831e+06	1.21675e+07	1.07649e+07	5.13382e+06	9.6563e+06	2.38511e+07	2.27017e+07	2.57123e+07	1.12174e+07	7.87928e+06	1.33913e+07	1.63875e+07	1.60241e+07	1.68007e+07	1
Q06481	Amyloid beta precursor like protein 2 OS=Homo sapiens OX=9606 GN=APLP2 PE=1 SV=2	0	71.744	27	17	392	17	763	86.9	4.79	213.38	17	0	0.793	0.713	0.789447	0.239131	22	26.56	84.2	105.7	110.1	7.43	6.39	27.69	7.40711e+07	7.68556e+07	7.42653e+07	8.55594e+07	8.921e+07	8.22771e+07	6.17362e+07	4.95266e+07	5.96675e+07	7.40711e+07	7.94539e+07	8.59102e+07	9.96649e+07	1.0249e+08	9.05529e+07	9.39818e+07	1.54586e+08	1.03814e+08	1
P67809	Y-box-binding protein 1 OS=Homo sapiens OX=9606 GN=YBX1 PE=1 SV=3	0	71.713	47	12	249	8	324	35.9	9.88	124.81	12	3	1.86	0.898	0.350039	0.922241	23.55	27.91	115.1	62.4	122.5	8.19	9.98	11.15	1.17167e+08	1.15727e+08	1.17471e+08	5.67799e+07	5.64936e+07	4.9854e+07	8.36825e+07	4.85893e+07	7.14325e+07	1.17167e+08	1.19639e+08	1.3589e+08	6.61408e+07	6.49035e+07	5.48685e+07	1.27391e+08	1.51661e+08	1.24283e+08	1
P61247	Small ribosomal subunit protein eS1 OS=Homo sapiens OX=9606 GN=RPS3A PE=1 SV=2	0	71.691	44	14	444	14	264	29.9	9.73	206.82	14	0	1.384	1.001	0.862585	0.994006	35.49	47.95	115.5	73	111.5	3.41	25.71	1.37	8.79379e+07	8.16289e+07	7.1069e+07	6.77181e+07	4.64449e+07	4.58088e+07	5.35498e+07	2.61624e+07	4.57913e+07	8.79379e+07	8.43885e+07	8.22127e+07	7.88823e+07	5.33589e+07	5.04165e+07	8.15195e+07	8.16602e+07	7.96709e+07	1
Q9HAW4	Claspin OS=Homo sapiens OX=9606 GN=CLSPN PE=1 SV=3	0	71.646	15	18	205	18	1339	151	4.82	88.3	18	0	1.993	0.563	0.232196	0.00649378	30.65	37.61	92.1	51.2	156.6	13.31	12.66	36.99	2.57699e+07	2.40788e+07	2.73233e+07	1.08836e+07	1.24763e+07	1.48386e+07	2.73488e+07	2.48162e+07	2.51821e+07	2.57699e+07	2.48928e+07	3.16076e+07	1.26779e+07	1.43336e+07	1.63311e+07	4.16334e+07	7.74582e+07	4.38136e+07	1
P46939	Utrophin OS=Homo sapiens OX=9606 GN=UTRN PE=1 SV=2	0	71.627	8	21	94	21	3433	394.2	5.33	24.14	21	0	1.298	1.344	0.91757	0.272296	22.9	22.9	119.3	91.9	88.8	15.51	9.67	21.82	3762584	4.31041e+06	4.44717e+06	2947825	2.54487e+06	3187298	2.17845e+06	1.23963e+06	1.42212e+06	3762584	4.45613e+06	5.14449e+06	3.43381e+06	2.92371e+06	3.50789e+06	3.31628e+06	3.86922e+06	2.4743e+06	1
Q15393	Splicing factor 3B subunit 3 OS=Homo sapiens OX=9606 GN=SF3B3 PE=1 SV=4	0	71.598	18	20	323	20	1217	135.5	5.26	136.03	20	0	0.954	1.13	0.944469	0.868331	15.44	20.65	111.9	106	82.1	17.44	3.34	18.29	3.51286e+07	4.8077e+07	3.55698e+07	3.34717e+07	3.4529e+07	3.37749e+07	2.44311e+07	8.30619e+06	1.73517e+07	3.51286e+07	4.97023e+07	4.11472e+07	3.899e+07	3.96692e+07	3.71721e+07	3.71917e+07	2.5926e+07	3.01897e+07	1
P48444	Coatomer subunit delta OS=Homo sapiens OX=9606 GN=ARCN1 PE=1 SV=1	0	71.597	33	16	409	16	511	57.2	6.21	205.15	16	0	1.152	0.93	0.968174	0.954745	22.65	21.17	103.6	88.2	108.2	11.32	4.15	18.91	4.32087e+07	4.98856e+07	4.65633e+07	3.67403e+07	3.82105e+07	4.21526e+07	3.24816e+07	2.24972e+07	3.09759e+07	4.32087e+07	5.1572e+07	5.38645e+07	4.27975e+07	4.38988e+07	4.63925e+07	4.94471e+07	7.022e+07	5.38941e+07	1
P00338	L-lactate dehydrogenase A chain OS=Homo sapiens OX=9606 GN=LDHA PE=1 SV=2	0	71.246	43	15	366	14	332	36.7	8.27	192.74	15	0	1.188	0.978	0.965964	0.994006	27.42	33.83	112.4	91.9	95.7	20.96	14	27.33	4.36832e+07	6.23659e+07	5.5969e+07	3.51708e+07	4.586e+07	4.8108e+07	2.9568e+07	2.4488e+07	3.1561e+07	4.36832e+07	6.44743e+07	6.4745e+07	4.09692e+07	5.2687e+07	5.2947e+07	4.50118e+07	7.64339e+07	5.49121e+07	1
P25205	DNA replication licensing factor MCM3 OS=Homo sapiens OX=9606 GN=MCM3 PE=1 SV=3	0	71.227	29	19	279	19	808	90.9	5.77	117.92	19	0	1.197	1.088	0.965964	0.908189	23.1	37.99	112.4	83.8	103.8	8.46	4.08	6.6	1.92708e+07	2.17291e+07	1.93074e+07	1.42715e+07	1.55342e+07	1.51376e+07	1.27742e+07	7.10606e+06	1.18635e+07	1.92708e+07	2.24637e+07	2.23348e+07	1.66243e+07	1.78466e+07	1.66602e+07	1.94464e+07	2.218e+07	2.0641e+07	1
P51116	RNA-binding protein FXR2 OS=Homo sapiens OX=9606 GN=FXR2 PE=1 SV=2	0	71.198	29	15	374	14	673	74.2	6.23	147.8	15	0	2.075	1.166	0.17202	0.793148	25.71	19.78	125.6	59	115.4	16.05	7.96	8.21	3.26127e+07	3.02334e+07	3.59978e+07	1.23862e+07	1.33429e+07	1.53339e+07	1.74891e+07	1.00248e+07	1.72237e+07	3.26127e+07	3.12555e+07	4.16423e+07	1.44283e+07	1.53292e+07	1.68762e+07	2.66239e+07	3.12903e+07	2.9967e+07	1
Q14444	Caprin-1 OS=Homo sapiens OX=9606 GN=CAPRIN1 PE=1 SV=2	0	71.137	24	15	498	15	709	78.3	5.25	224.73	15	0	3.007	1.079	0.00405797	0.931837	34.73	22.59	146	44.1	109.9	11.53	13.18	2.81	1.05304e+08	1.24922e+08	1.12345e+08	2.82659e+07	3.39715e+07	3.90189e+07	6.16135e+07	3.17697e+07	5.5885e+07	1.05304e+08	1.29145e+08	1.2996e+08	3.29259e+07	3.90287e+07	4.29436e+07	9.37949e+07	9.91623e+07	9.72326e+07	1
Q02543	Large ribosomal subunit protein eL20 OS=Homo sapiens OX=9606 GN=RPL18A PE=1 SV=2	0	71.137	47	14	519	14	176	20.7	10.71	273.13	14	0	1.149	1.124	0.96956	0.881041	22.1	48.22	106.4	95.7	97.8	4.23	4.35	2.81	2.66514e+08	2.62593e+08	2.16315e+08	2.1451e+08	1.99359e+08	2.17846e+08	1.60931e+08	7.89437e+07	1.34486e+08	2.66514e+08	2.7147e+08	2.50233e+08	2.49875e+08	2.29037e+08	2.39758e+08	2.44987e+08	2.46405e+08	2.33988e+08	1
O14980	Exportin-1 OS=Homo sapiens OX=9606 GN=XPO1 PE=1 SV=1	0	70.857	19	15	264	15	1071	123.3	6.06	91.19	15	0	0.853	1.007	0.87942	0.983822	25.59	39.44	96.7	119.6	83.7	9.5	10.92	5.59	2.13676e+07	23526609	2.23169e+07	2.24067e+07	2.8279e+07	2.73476e+07	1.33299e+07	7.24934e+06	1.20979e+07	2.13676e+07	2.4322e+07	2.58162e+07	2.61008e+07	3.24888e+07	3.00984e+07	2.02922e+07	2.26273e+07	2.10489e+07	1
O14617	AP-3 complex subunit delta-1 OS=Homo sapiens OX=9606 GN=AP3D1 PE=1 SV=1	0	70.806	20	16	233	16	1153	130.1	8.48	86.24	16	0	1.257	0.921	0.930685	0.954745	33.58	29.38	102.1	86.4	111.5	10.72	15.55	22.39	2.85172e+07	3.20563e+07	3.05176e+07	2.40765e+07	3.13952e+07	2.51059e+07	2.15764e+07	1.58836e+07	2.08041e+07	2.85172e+07	3.314e+07	3.53028e+07	2.80459e+07	3.60689e+07	2.76312e+07	3.28461e+07	4.95773e+07	3.61964e+07	1
Q9P258	Protein RCC2 OS=Homo sapiens OX=9606 GN=RCC2 PE=1 SV=2	0	70.695	38	15	258	15	522	56	8.78	106.38	15	0	5.755	1.217	6.40877e-08	0.663227	25.45	17.42	156.6	21.7	121.7	14.33	22.64	5.69	6.87161e+07	8.8497e+07	7.33279e+07	6.84357e+06	1.08919e+07	1.06839e+07	4.3309e+07	1.93231e+07	3.863e+07	6.87161e+07	9.14888e+07	8.48257e+07	7.97182e+06	1.25133e+07	1.17585e+07	6.59298e+07	6.03128e+07	6.72111e+07	1
Q96GQ7	Probable ATP-dependent RNA helicase DDX27 OS=Homo sapiens OX=9606 GN=DDX27 PE=1 SV=2	0	70.584	23	18	333	18	796	89.8	9.28	156.26	18	0	0.985	1.025	0.965964	0.979246	14.11	21.62	101.4	100.3	98.2	5.53	5.21	5.97	4.29549e+07	3.90189e+07	3.89555e+07	3.91889e+07	3.59499e+07	3.8597e+07	2.91324e+07	1.33287e+07	2.26266e+07	4.29549e+07	4.0338e+07	4.50638e+07	4.56498e+07	4.13016e+07	4.24793e+07	4.43486e+07	4.16027e+07	3.93674e+07	1
P26373	Large ribosomal subunit protein eL13 OS=Homo sapiens OX=9606 GN=RPL13 PE=1 SV=4	0	70.52	45	14	972	14	211	24.2	11.65	529.14	14	0	1.299	1.088	0.916551	0.922241	24.9	20.71	112.1	88.4	99.5	2.53	1.74	9.11	7.00645e+08	6.53303e+08	6.13047e+08	4.74075e+08	466832936	5.02711e+08	4.57015e+08	1.86466e+08	3.57545e+08	7.00645e+08	6.75389e+08	7.09174e+08	5.52232e+08	5.36328e+08	5.53276e+08	6.95719e+08	5.82013e+08	6.22082e+08	1
Q03169	Tumor necrosis factor alpha-induced protein 2 OS=Homo sapiens OX=9606 GN=TNFAIP2 PE=1 SV=2	0	70.406	30	17	328	17	654	72.6	6.46	131.87	17	0	1.389	0.929	0.862585	0.954745	13.04	17.12	108	79.1	112.9	4.29	10.22	1.51	3.26256e+07	3.31866e+07	2.72424e+07	1.75033e+07	2.07837e+07	2.25991e+07	2.23738e+07	1.09276e+07	2.01064e+07	3.26256e+07	3.43086e+07	3.1514e+07	2.0389e+07	2.38776e+07	2.48722e+07	3.40599e+07	3.41082e+07	3.49824e+07	1
P46087	Probable 28S rRNA (cytosine(4447)-C(5))-methyltransferase OS=Homo sapiens OX=9606 GN=NOP2 PE=1 SV=2	0	70.327	26	18	287	18	812	89.2	9.23	126.13	18	0	0.96	1.1	0.954467	0.908189	15.81	17.53	106.9	108.4	84.7	9.2	1.71	11.19	3.19723e+07	2.87827e+07	2.29803e+07	2.58829e+07	2.64359e+07	2.6706e+07	1.80895e+07	7.13941e+06	1.35483e+07	3.19723e+07	2.97557e+07	2.65836e+07	3.015e+07	3.03713e+07	2.93922e+07	2.75378e+07	2.22841e+07	2.35722e+07	1
Q96RQ3	Methylcrotonoyl-CoA carboxylase subunit alpha, mitochondrial OS=Homo sapiens OX=9606 GN=MCCC1 PE=1 SV=3	0	70.304	28	14	290	14	725	80.4	7.78	125.17	14	0	0.797	0.893	0.797331	0.913411	18.1	18.83	87.5	121.3	91.2	7.41	4.06	16.71	3.413e+07	3.82416e+07	3.13985e+07	4.25362e+07	4.65382e+07	4.57319e+07	2.2509e+07	1.50999e+07	2.17423e+07	3.413e+07	3.95345e+07	3.63219e+07	4.95488e+07	5.34661e+07	5.03318e+07	3.42657e+07	4.71311e+07	3.78287e+07	1
Q6P1N0	Coiled-coil and C2 domain-containing protein 1A OS=Homo sapiens OX=9606 GN=CC2D1A PE=1 SV=1	0	69.679	24	17	316	17	951	104	8.09	149.91	17	0	1.172	1.697	0.965964	0.0107134	20.38	30.38	113.7	105.8	80.4	18.72	6.78	7.92	2.93697e+07	2.95471e+07	3.52649e+07	2.18807e+07	2.52122e+07	2.58308e+07	1.41892e+07	7.74359e+06	1.19602e+07	2.93697e+07	3.0546e+07	4.07944e+07	2.54881e+07	2.89654e+07	2.8429e+07	2.16003e+07	2.41699e+07	2.08091e+07	1
Q7L576	Cytoplasmic FMR1-interacting protein 1 OS=Homo sapiens OX=9606 GN=CYFIP1 PE=1 SV=1	0	69.546	15	17	222	11	1253	145.1	6.9	93.47	17	4	1.018	1.087	0.971497	0.907956	27.34	27.69	118.6	94.6	86.8	9.59	7.74	5.76	1.77907e+07	1.99398e+07	1.85336e+07	1.4123e+07	1.58691e+07	14264889	1.00591e+07	4.83452e+06	7.90016e+06	1.77907e+07	2.06139e+07	2.14397e+07	1.64514e+07	1.82314e+07	1.56997e+07	1.53131e+07	1.50899e+07	1.37452e+07	1
P30153	Serine/threonine-protein phosphatase 2A 65 kDa regulatory subunit A alpha isoform OS=Homo sapiens OX=9606 GN=PPP2R1A PE=1 SV=4	0	69.482	29	14	254	10	589	65.3	5.11	89.62	14	3	0.986	1.194	0.965964	0.719871	24.59	33.79	109.7	107	83.3	20.11	13.19	17.4	4.3056e+07	5.26962e+07	3.17426e+07	3.33492e+07	3.65366e+07	4.54296e+07	2.14788e+07	9.20563e+06	2.31873e+07	4.3056e+07	5.44776e+07	3.67198e+07	3.88473e+07	4.19757e+07	4.99991e+07	3.26975e+07	2.87334e+07	4.03428e+07	1
P42345	Serine/threonine-protein kinase mTOR OS=Homo sapiens OX=9606 GN=MTOR PE=1 SV=1	0	69.33	10	18	204	18	2549	288.7	7.17	63.81	18	0	0.891	1.043	0.908959	0.946202	28.04	22.69	101.2	112.9	85.9	12.29	11.37	11.64	6.89691e+06	8.52025e+06	7.11543e+06	7.92146e+06	6.53361e+06	8.34715e+06	3.76156e+06	2.23888e+06	4.093e+06	6.89691e+06	8.80829e+06	8.23113e+06	9.22742e+06	7.50624e+06	9.18674e+06	5.72626e+06	6.98819e+06	7.12128e+06	1
P08779	Keratin, type I cytoskeletal 16 OS=Homo sapiens OX=9606 GN=KRT16 PE=1 SV=4	0	69.077	30	16	333	4	473	51.2	5.05	154.29	16	0	2.454	1.042	0.042212	0.934282	15.27	56.31	157.3	44.7	97.9	26.09		84.61	3.87585e+06	2.43602e+06	3.71567e+06	946238			410460	1.68798e+06	1.38614e+06	3.87585e+06	2.51837e+06	4.2983e+06	1.10224e+06			624848	5.26865e+06	2.4117e+06	1
Q96SN8	CDK5 regulatory subunit-associated protein 2 OS=Homo sapiens OX=9606 GN=CDK5RAP2 PE=1 SV=5	0	69.031	12	20	94	18	1893	214.9	5.58	31.26	20	2	1.087	0.618	0.997621	0.0668754	14.58	23.82	69.3	58.1	172.6	43.79	34.62	47.79	5.67458e+06	5.69338e+06	1.97516e+06	4.58068e+06	4.13979e+06	2.33166e+06	9.27652e+06	7.16151e+06	4.70548e+06	5.67458e+06	5.88585e+06	2.28486e+06	5.33587e+06	4.75606e+06	2.56619e+06	1.41218e+07	2.23531e+07	8.18693e+06	1
P22102	Trifunctional purine biosynthetic protein adenosine-3 OS=Homo sapiens OX=9606 GN=GART PE=1 SV=1	0	68.933	23	18	314	18	1010	107.7	6.7	141.6	18	0	0.982	0.942	0.965964	0.966179	15.7	25.21	90.3	99	110.6	16.2	1.75	16.48	2.76892e+07	3.43962e+07	2.30726e+07	2.60617e+07	2.58986e+07	2.79963e+07	2.22771e+07	1.1962e+07	1.53919e+07	2.76892e+07	3.5559e+07	2.66904e+07	3.03583e+07	2.9754e+07	3.08123e+07	3.39128e+07	3.73368e+07	2.67799e+07	1
Q99832	T-complex protein 1 subunit eta OS=Homo sapiens OX=9606 GN=CCT7 PE=1 SV=2	0	68.507	37	16	274	16	543	59.3	7.65	117.84	16	0	1.316	1.163	0.906843	0.805568	18.26	20.36	117.8	82.8	99.4	8.86	4.85	6.39	3.35679e+07	3.77169e+07	3.42115e+07	2.45486e+07	2.38434e+07	2.35782e+07	1.98115e+07	10966899	1.88943e+07	3.35679e+07	3.8992e+07	3.95759e+07	2.85957e+07	2.73928e+07	2.59498e+07	3.01592e+07	3.42308e+07	3.28737e+07	1
P26599	Polypyrimidine tract-binding protein 1 OS=Homo sapiens OX=9606 GN=PTBP1 PE=1 SV=2	0	68.369	33	12	401	11	557	59.6	9.16	175.34	12	1	1.813	1.536	0.397944	0.0584846	24.86	26.82	153.7	73.3	73	5.75	26.38	6.85	1.55223e+08	1.68452e+08	1.42083e+08	6.73095e+07	1.01582e+08	6.68574e+07	5.13015e+07	2.28447e+07	4.6956e+07	1.55223e+08	1.74147e+08	1.64362e+08	7.84064e+07	1.16704e+08	7.35822e+07	7.80969e+07	7.13048e+07	8.16974e+07	1
Q96F86	Enhancer of mRNA-decapping protein 3 OS=Homo sapiens OX=9606 GN=EDC3 PE=1 SV=1	0	68.331	44	16	243	16	508	56	7.11	107.91	16	0	1.063	2.096	0.995287	6.65827e-05	24.91	15.77	144.8	118.5	36.7	2.53	14.71	6.08	5.2554e+07	4.87299e+07	4.55912e+07	3.69222e+07	4.5504e+07	3.58787e+07	9.36891e+06	4.27124e+06	7262666	5.2554e+07	5.03773e+07	5.274e+07	4.30093e+07	5.2278e+07	3.94876e+07	1.42624e+07	1.33317e+07	1.26361e+07	1
P33991	DNA replication licensing factor MCM4 OS=Homo sapiens OX=9606 GN=MCM4 PE=1 SV=5	0	68.043	23	14	236	14	863	96.5	6.74	91.55	14	0	0.995	0.72	0.965964	0.294906	10.44	11.44	84.9	87.6	127.5	20.42	7.11	15.07	1.00067e+07	1.25613e+07	1.31252e+07	1.15003e+07	1.31555e+07	1.21681e+07	1.12435e+07	7.39317e+06	1.12096e+07	1.00067e+07	1.2986e+07	1.51832e+07	1.33962e+07	1.51139e+07	1.3392e+07	1.71161e+07	2.30762e+07	1.95033e+07	1
P35998	26S proteasome regulatory subunit 7 OS=Homo sapiens OX=9606 GN=PSMC2 PE=1 SV=3	0	67.901	37	16	227	16	433	48.6	5.95	95.11	16	0	1.081	0.925	0.999941	0.954745	18.94	26.89	101.7	89.8	108.6	14.48	5.7	3.24	2.35018e+07	2.91358e+07	2.67516e+07	2.1021e+07	2.31556e+07	2.48645e+07	2.03379e+07	10580761	1.8488e+07	2.35018e+07	3.01208e+07	3.09463e+07	2.44866e+07	2.66026e+07	2.73655e+07	3.09607e+07	3.30255e+07	3.21668e+07	1
A0A2R8Y4L2	Heterogeneous nuclear ribonucleoprotein A1-like 3 OS=Homo sapiens OX=9606 GN=HNRNPA1L3 PE=4 SV=2	0	67.646	49	13	273	12	320	34.3	9	116.22	13	0	2.282	1.081	0.0842202	0.930785	32.82	32.92	128.1	62	110	12.53	5.76	6.92	4.83536e+07	5.85639e+07	5.24696e+07	2.51444e+07	2.69086e+07	2.50304e+07	3.7601e+07	1.6653e+07	2.88308e+07	4.83536e+07	6.05438e+07	6.06968e+07	2.92897e+07	3.09144e+07	2.75481e+07	5.72405e+07	5.19788e+07	5.01618e+07	1
P41091	Eukaryotic translation initiation factor 2 subunit 3 OS=Homo sapiens OX=9606 GN=EIF2S3 PE=1 SV=3	0	67.516	34	14	320	14	472	51.1	8.4	155.22	14	0	1.44	1.172	0.818546	0.774853	21.38	27.21	119.4	81.1	99.5	14.26	10.3	7.21	8.90033e+07	1.0451e+08	1.02525e+08	7.24403e+07	6.38878e+07	62969005	6.47402e+07	2.74265e+07	5.17241e+07	8.90033e+07	1.08043e+08	1.18601e+08	8.4383e+07	7.33984e+07	6.93027e+07	9.85549e+07	8.56059e+07	8.99932e+07	1
Q2VIR3	Eukaryotic translation initiation factor 2 subunit 3B OS=Homo sapiens OX=9606 GN=EIF2S3B PE=2 SV=2	0	67.516	34	14	320	14	472	51.2	8.4	155.22	14	0	1.44	1.172	0.818546	0.774853	21.38	27.21	119.4	81.1	99.5	14.26	10.3	7.21	8.90033e+07	1.0451e+08	1.02525e+08	7.24403e+07	6.38878e+07	62969005	6.47402e+07	2.74265e+07	5.17241e+07	8.90033e+07	1.08043e+08	1.18601e+08	8.4383e+07	7.33984e+07	6.93027e+07	9.85549e+07	8.56059e+07	8.99932e+07	1
P15170	Eukaryotic peptide chain release factor GTP-binding subunit ERF3A OS=Homo sapiens OX=9606 GN=GSPT1 PE=1 SV=1	0	67.508	39	16	245	16	499	55.7	5.62	99.57	16	0	1.172	0.792	0.965964	0.599953	29.07	34.69	101.7	84.7	113.6	9.58	2.01	6.27	2.97564e+07	3.47667e+07	2.9562e+07	2.36117e+07	24774812	2.59038e+07	2.50904e+07	1.32052e+07	2.0937e+07	2.97564e+07	3.59421e+07	3.41974e+07	2.75044e+07	2.84629e+07	2.85093e+07	3.81954e+07	4.12171e+07	3.64277e+07	1
P12956	X-ray repair cross-complementing protein 6 OS=Homo sapiens OX=9606 GN=XRCC6 PE=1 SV=2	0	67.499	31	17	313	17	609	69.8	6.64	118.84	17	0	0.68	1.013	0.510763	0.987854	28.05	44.04	86.5	123.9	89.6	9.8	3.86	1.74	34822458	3.66015e+07	3.65538e+07	4.95548e+07	4.72019e+07	4.89299e+07	2.57754e+07	1.29213e+07	2.24481e+07	34822458	3.78388e+07	4.22855e+07	5.77246e+07	5.42286e+07	5.38514e+07	3.92382e+07	4.03311e+07	3.90567e+07	1
P05067	Amyloid-beta precursor protein OS=Homo sapiens OX=9606 GN=APP PE=1 SV=3	0	67.486	19	13	419	13	770	86.9	4.82	174.88	13	0	0.724	0.761	0.639378	0.450795	28.85	21.98	82.5	119.9	97.6	10.66	2.39	15.21	6.91925e+07	7.77396e+07	5.68169e+07	8.63484e+07	8.83487e+07	88135324	5.15742e+07	33053812	4.70727e+07	6.91925e+07	8.03678e+07	6.57259e+07	1.00584e+08	1.01501e+08	9.70004e+07	7.8512e+07	1.0317e+08	8.19003e+07	1
Q12873	Chromodomain-helicase-DNA-binding protein 3 OS=Homo sapiens OX=9606 GN=CHD3 PE=1 SV=3	0	67.339	13	16	152	12	2000	226.5	7.3	42.84	16	2	1.135	0.824	0.976582	0.865039	25.01	27.44	110.9	68.8	120.4	25.41	21.61	28.27	7.21118e+06	4.57666e+06	4.13579e+06	2.54727e+06	3.10214e+06	2.08363e+06	2.90699e+06	2.41213e+06	2.98563e+06	7.21118e+06	4.73138e+06	4.78429e+06	2.96722e+06	3.56394e+06	2.29321e+06	4.42534e+06	7.52895e+06	5.19461e+06	1
Q15025	TNFAIP3-interacting protein 1 OS=Homo sapiens OX=9606 GN=TNIP1 PE=1 SV=2	0	67.337	30	15	264	15	636	71.8	6.62	108.55	15	0	1.098	0.617	0.994877	0.03557	20.23	18.92	86.3	77.4	136.3	9.85	7.47	21.96	2.31212e+07	2.33692e+07	2.4043e+07	1.85938e+07	2.08778e+07	1.88873e+07	2.50556e+07	16634158	1.99198e+07	2.31212e+07	2.41592e+07	2.7813e+07	2.16592e+07	2.39858e+07	2.07871e+07	3.81424e+07	5.19199e+07	3.46578e+07	1
O00468	Agrin OS=Homo sapiens OX=9606 GN=AGRN PE=1 SV=6	0	67.308	14	16	189	16	2068	217.2	6.39	60.33	16	0	0.884	0.93	0.906843	0.983159	17.01	24.1	104.3	104.8	90.9	3.73	17.34	15.51	7.86954e+06	7.34336e+06	6.3131e+06	6.54726e+06	7397481	5.43571e+06	5.6159e+06	2.11002e+06	3.80301e+06	7.86954e+06	7.59162e+06	7.303e+06	7.62666e+06	8.49871e+06	5.98246e+06	8.54915e+06	6.58598e+06	6.61675e+06	1
P06744	Glucose-6-phosphate isomerase OS=Homo sapiens OX=9606 GN=GPI PE=1 SV=4	0	67.197	31	12	239	12	558	63.1	8.32	90.9	12	0	0.977	1.105	0.965964	0.907414	36.2	49.74	94.3	111.7	94	5.72	5.8	7.37	8.19628e+07	8.80999e+07	7.21289e+07	8.4765e+07	9.01339e+07	8.37873e+07	5.66207e+07	2.39076e+07	4.77793e+07	8.19628e+07	9.10783e+07	8.34387e+07	9.87396e+07	1.03552e+08	9.22149e+07	8.61944e+07	7.46222e+07	8.31299e+07	1
Q8IZH2	5'-3' exoribonuclease 1 OS=Homo sapiens OX=9606 GN=XRN1 PE=1 SV=1	0	67.077	11	18	182	18	1706	194	7.21	69.56	18	0	2.251	1.094	0.0929221	0.903222	22.51	26.26	140.3	54	105.7	11.69	3.05	29.91	1.00749e+07	1.09192e+07	1.10022e+07	3.74823e+06	3.59479e+06	3.94737e+06	4.78057e+06	4.06662e+06	4.89011e+06	1.00749e+07	1.12884e+07	1.27274e+07	4.36618e+06	4.12993e+06	4.34441e+06	7.27752e+06	1.26931e+07	8.50815e+06	1
P47756	F-actin-capping protein subunit beta OS=Homo sapiens OX=9606 GN=CAPZB PE=1 SV=5	0	66.998	51	13	300	13	272	30.6	6	117.03	13	0	1.691	0.908	0.535004	0.932688	33.49	37.74	133.7	52.7	113.6	13.99	21.26	15.58	5.20088e+07	6.63045e+07	5.04585e+07	1.97591e+07	2.80137e+07	2.03085e+07	26428766	1.58916e+07	3.16827e+07	5.20088e+07	6.85461e+07	5.83704e+07	2.30166e+07	3.2184e+07	2.23512e+07	4.02328e+07	4.96022e+07	5.51237e+07	1
P28340	DNA polymerase delta catalytic subunit OS=Homo sapiens OX=9606 GN=POLD1 PE=1 SV=2	0	66.945	19	16	200	16	1107	123.6	7.03	73.24	16	0	1.269	0.769	0.930685	0.701501	14.6	19.57	76.1	65.8	158.1	13.68	28.63	10.54	4.6444e+06	5.44755e+06	3.76876e+06	3.44994e+06	3.08635e+06	5.43713e+06	7383113	2.95812e+06	5.5463e+06	4.6444e+06	5.63172e+06	4.3597e+06	4.0187e+06	3.5458e+06	5.98402e+06	1.12394e+07	9.23314e+06	9.64985e+06	1
P43490	Nicotinamide phosphoribosyltransferase OS=Homo sapiens OX=9606 GN=NAMPT PE=1 SV=1	0	66.896	41	16	323	16	491	55.5	7.15	154.26	16	0	1.27	0.867	0.930685	0.87009	18.92	18.26	106.4	78.7	114.9	10.69	8.52	4.95	7.5788e+07	9.08088e+07	7.54504e+07	4.95861e+07	5.95972e+07	5.86848e+07	5.80288e+07	3.12166e+07	5.41929e+07	7.5788e+07	9.38787e+07	8.72811e+07	5.7761e+07	6.84692e+07	6.45876e+07	8.8338e+07	9.74357e+07	9.42887e+07	1
P60174	Triosephosphate isomerase OS=Homo sapiens OX=9606 GN=TPI1 PE=1 SV=4	0	66.791	71	13	249	13	249	26.7	6.9	101.39	13	0	0.933	1.047	0.932471	0.958844	26.88	26.15	87.9	112.5	99.6	28.85	10.28	4.22	3.41623e+07	5.21369e+07	2.87491e+07	3.75221e+07	3.2353e+07	4.11959e+07	2.54293e+07	1.16065e+07	2.25482e+07	3.41623e+07	5.38994e+07	3.3257e+07	4.37081e+07	3.71693e+07	4.53396e+07	3.87114e+07	3.62273e+07	3.9231e+07	1
Q9UP95	Solute carrier family 12 member 4 OS=Homo sapiens OX=9606 GN=SLC12A4 PE=1 SV=2	0	66.748	16	16	247	16	1085	120.6	6.44	97.18	16	0	0.676	0.787	0.497682	0.667096	22.65	16.32	79.5	122	98.5	2.32	9.59	7.7	1.36932e+07	1.34765e+07	1.15006e+07	1.53861e+07	1.83034e+07	1.9504e+07	1.11464e+07	5.78576e+06	8895720	1.36932e+07	1.39321e+07	1.33039e+07	1.79227e+07	2.10281e+07	2.14658e+07	1.69684e+07	1.8059e+07	1.54774e+07	1
Q96J02	E3 ubiquitin-protein ligase Itchy homolog OS=Homo sapiens OX=9606 GN=ITCH PE=1 SV=2	0	66.587	23	15	320	12	903	102.7	6.3	151.06	15	0	1.09	1.1	0.99661	0.908189	23.28	22.54	108.9	93.8	97.3	6.18	9.36	20.76	2.76044e+07	2.71082e+07	2.15801e+07	1.98485e+07	2.06775e+07	2.49079e+07	1.79841e+07	5.75526e+06	1.41691e+07	2.76044e+07	2.80246e+07	2.49639e+07	2.31208e+07	2.37556e+07	2.74133e+07	2.73775e+07	1.79638e+07	2.46525e+07	1
O43175	D-3-phosphoglycerate dehydrogenase OS=Homo sapiens OX=9606 GN=PHGDH PE=1 SV=4	0	66.416	29	12	418	12	533	56.6	6.71	195.91	12	0	0.849	0.928	0.877845	0.954745	13.72	18.33	89.7	111.1	99.1	13.44	4.1	6.34	1.06484e+08	1.27786e+08	9.04049e+07	1.13189e+08	1.11689e+08	1.26316e+08	7.37937e+07	4.07601e+07	6.75968e+07	1.06484e+08	1.32106e+08	1.0458e+08	1.31849e+08	1.28315e+08	1.39021e+08	1.12337e+08	1.27224e+08	1.1761e+08	1
Q6P2E9	Enhancer of mRNA-decapping protein 4 OS=Homo sapiens OX=9606 GN=EDC4 PE=1 SV=1	0	66.223	16	15	207	15	1401	151.6	5.86	82.06	15	0	0.475	1.012	0.0432003	0.970447	32.23	28.52	44.4	183.2	72.4	50.3	4.07	39.03	7.69135e+06	5.79782e+06	1.30185e+07	2.79789e+07	2.61775e+07	2.8842e+07	3.76159e+06	4.1554e+06	7.20865e+06	7.69135e+06	5.99383e+06	1.50598e+07	3.25916e+07	3.00744e+07	3.1743e+07	5.72631e+06	1.29702e+07	1.25421e+07	1
P53396	ATP-citrate synthase OS=Homo sapiens OX=9606 GN=ACLY PE=1 SV=3	0	66.128	20	18	169	18	1101	120.8	7.33	73.8	18	0	0.957	0.995	0.950114	0.986757	23	28.93	93	111.6	95.4	23.34	6.6	3.43	1.00839e+07	1.5541e+07	1.08251e+07	1.17763e+07	1.30914e+07	1.41956e+07	8.40881e+06	4.35827e+06	7.38713e+06	1.00839e+07	1.60664e+07	1.25225e+07	1.37177e+07	1.50403e+07	1.56235e+07	1.28008e+07	1.36034e+07	1.28527e+07	1
P30622	CAP-Gly domain-containing linker protein 1 OS=Homo sapiens OX=9606 GN=CLIP1 PE=1 SV=2	0	66.031	13	17	150	17	1438	162.1	5.36	67.88	17	0	0.735	0.588	0.661428	0.0276183	24.62	34.67	84.8	103.2	112	7.39	16.33	35.31	1.2542e+07	1.09109e+07	9.43191e+06	1.52604e+07	1.16512e+07	1.24703e+07	9.30631e+06	8.22601e+06	8.56432e+06	1.2542e+07	1.12798e+07	1.09108e+07	1.77763e+07	1.33856e+07	1.37246e+07	1.41671e+07	2.56757e+07	1.49008e+07	1
P17987	T-complex protein 1 subunit alpha OS=Homo sapiens OX=9606 GN=TCP1 PE=1 SV=1	0	65.987	39	15	268	15	556	60.3	6.11	119.83	15	0	1.133	1.016	0.976893	0.983822	17.44	29.85	108.7	91.2	100.1	4.53	3.75	2.38	4.81712e+07	5.06065e+07	4.4937e+07	3.98403e+07	3.77879e+07	3.96444e+07	3.14576e+07	1.4877e+07	27976464	4.81712e+07	5.23173e+07	5.19832e+07	4.64085e+07	4.34132e+07	4.3632e+07	4.78883e+07	4.64352e+07	4.86754e+07	1
P55060	Exportin-2 OS=Homo sapiens OX=9606 GN=CSE1L PE=1 SV=3	0	65.881	23	18	209	18	971	110.3	5.77	99.63	18	0	1	0.862	0.965964	0.881041	29.26	27.34	96.7	97.5	105.7	23.65	13.89	10.74	1.25305e+07	1.8344e+07	1.73321e+07	1.36009e+07	1.82387e+07	1.73802e+07	1.15316e+07	6.93243e+06	1.19181e+07	1.25305e+07	1.89641e+07	2.00498e+07	1.58431e+07	2.09538e+07	1.91283e+07	1.75547e+07	2.16381e+07	2.07359e+07	1
Q14974	Importin subunit beta-1 OS=Homo sapiens OX=9606 GN=KPNB1 PE=1 SV=2	0	65.863	18	14	311	14	876	97.1	4.78	143.12	14	0	1.025	1.046	0.976582	0.959746	26.51	21.3	101.8	109.3	88.9	7.94	12.68	6.34	3.5515e+07	4.02807e+07	3.33221e+07	2.94752e+07	3.845e+07	3.75757e+07	2.21032e+07	1.07077e+07	2.14691e+07	3.5515e+07	4.16425e+07	3.8547e+07	3.43346e+07	4.41738e+07	4.13552e+07	3.3648e+07	3.34219e+07	3.73534e+07	1
O95163	Elongator complex protein 1 OS=Homo sapiens OX=9606 GN=ELP1 PE=1 SV=3	0	65.787	14	17	343	17	1332	150.2	5.94	143.08	17	0	1.384	1.007	0.862585	0.980351	25.44	25.32	128.6	75.2	96.2	22.28	18.5	10.3	1.61006e+07	2.35352e+07	2.12583e+07	1.11574e+07	1.23878e+07	1.66882e+07	1.19611e+07	5.51152e+06	1.20364e+07	1.61006e+07	2.43309e+07	2.45916e+07	1.29968e+07	1.42319e+07	1.83668e+07	1.82086e+07	1.7203e+07	2.09417e+07	1
Q96EV2	RNA-binding protein 33 OS=Homo sapiens OX=9606 GN=RBM33 PE=1 SV=3	0	65.473	16	13	220	13	1170	129.9	6.93	96.61	13	0	2.193	0.696	0.114012	0.174261	41.95	32.56	113.6	34.4	152	19.17	12.12	25.12	1.88193e+07	2.17089e+07	2.38339e+07	5.83698e+06	5.43277e+06	7.18148e+06	1.97325e+07	1.43069e+07	1.67733e+07	1.88193e+07	2.24428e+07	2.75711e+07	6.79929e+06	6.24152e+06	7.90382e+06	3.00391e+07	4.46558e+07	2.91834e+07	1
Q99650	Oncostatin-M-specific receptor subunit beta OS=Homo sapiens OX=9606 GN=OSMR PE=1 SV=1	0	65.326	21	13	188	13	979	110.4	5.82	83.85	13	0	0.804	1.043	0.812521	0.958844	24.74	28.45	100.3	111.9	87.8	7.43	6.56	15.94	2.48678e+07	2.41847e+07	1.88987e+07	2.38206e+07	26376391	2.4262e+07	1.54446e+07	5.47858e+06	1.25067e+07	2.48678e+07	2.50023e+07	2.1862e+07	2.77477e+07	3.03029e+07	2.67024e+07	2.35115e+07	1.71002e+07	2.17601e+07	1
P35221	Catenin alpha-1 OS=Homo sapiens OX=9606 GN=CTNNA1 PE=1 SV=1	0	65.298	22	14	187	12	906	100	6.29	70.85	14	1	0.984	0.713	0.965964	0.266305	21.41	27.83	99.6	83.4	117	13.13	12.17	15.46	1.26362e+07	1.58458e+07	1.33265e+07	1.06109e+07	1.34544e+07	1.17328e+07	1.1631e+07	7.42001e+06	1.04099e+07	1.26362e+07	1.63815e+07	1.54161e+07	1.23602e+07	1.54573e+07	1.29129e+07	1.7706e+07	2.31599e+07	1.81119e+07	1
Q96EY1	DnaJ homolog subfamily A member 3, mitochondrial OS=Homo sapiens OX=9606 GN=DNAJA3 PE=1 SV=2	0	65.281	25	12	236	12	480	52.5	9.26	94.6	12	0	1.398	0.973	0.858541	0.992464	26.09	31.82	118.9	72.4	108.7	15.43	15.76	7.91	2.37492e+07	3.02323e+07	2.73735e+07	1.43381e+07	1.98473e+07	1.73091e+07	1.66082e+07	9.4326e+06	1.64298e+07	2.37492e+07	3.12544e+07	3.16657e+07	1.67019e+07	2.28019e+07	1.90501e+07	2.52828e+07	2.94418e+07	2.85857e+07	1
O75976	Carboxypeptidase D OS=Homo sapiens OX=9606 GN=CPD PE=1 SV=2	0	65.238	14	16	319	16	1380	152.8	6.05	133.51	16	0	0.784	1.03	0.761405	0.973135	16.11	15.7	99.5	112.2	88.4	3.8	9.89	7.83	28240782	2.78286e+07	2.3104e+07	2.61388e+07	2.77125e+07	3.33111e+07	1.86261e+07	7.88678e+06	1.4417e+07	28240782	2.87694e+07	2.67267e+07	3.04481e+07	3.18379e+07	3.66617e+07	2.83547e+07	2.46169e+07	2.50837e+07	1
Q8N4C8	Misshapen-like kinase 1 OS=Homo sapiens OX=9606 GN=MINK1 PE=1 SV=2	0	65.157	14	17	201	10	1332	149.7	7.85	80.64	17	5	1.052	0.978	0.992122	0.994006	23.06	27.81	105.4	75.4	119.1	9.76	16.47	10.13	1.27109e+07	1.22009e+07	1.29054e+07	9.1288e+06	6.64161e+06	8.26442e+06	8.00732e+06	4.74091e+06	8.25333e+06	1.27109e+07	1.26134e+07	1.4929e+07	1.06338e+07	7.63031e+06	9.0957e+06	1.21896e+07	1.47977e+07	1.43597e+07	1
Q9H3U1	Protein unc-45 homolog A OS=Homo sapiens OX=9606 GN=UNC45A PE=1 SV=1	0	65.125	21	16	321	16	944	103	6.07	146.27	16	0	0.914	0.96	0.930685	0.980177	22.04	23.97	97.7	107.1	95.2	4.31	9.38	3.94	2.86184e+07	26118537	2.27574e+07	2.54169e+07	2.9612e+07	2.59847e+07	1.72969e+07	8.43757e+06	1.41254e+07	2.86184e+07	2.70015e+07	2.63258e+07	2.96072e+07	3.40202e+07	2.85983e+07	2.63313e+07	2.63361e+07	2.45764e+07	1
O60231	Pre-mRNA-splicing factor ATP-dependent RNA helicase DHX16 OS=Homo sapiens OX=9606 GN=DHX16 PE=1 SV=2	0	65.095	20	16	201	16	1041	119.2	6.8	71.7	16	0	1.562	0.843	0.687522	0.865039	36.8	27.99	119.8	52.7	127.4	17.95	7.3	15.86	9.35994e+06	1.2772e+07	1.10812e+07	5.08717e+06	4.91012e+06	4.65609e+06	8.95286e+06	5.6336e+06	7.69178e+06	9.35994e+06	1.32038e+07	1.28187e+07	5.92586e+06	5.64106e+06	5.12441e+06	1.36291e+07	1.75841e+07	1.33827e+07	1
O94986	Centrosomal protein of 152 kDa OS=Homo sapiens OX=9606 GN=CEP152 PE=1 SV=4	0	64.948	13	18	89	18	1710	195.5	5.6	24.58	18	0	2.221	0.582	0.103618	0.0176388	31.68	30.59	81.2	29.6	189.2	30.65	12.61	55.03	2.16368e+06	3.30415e+06	3.56199e+06	966266	1.08264e+06	1.31074e+06	5.2248e+06	5.22532e+06	3.37109e+06	2.16368e+06	3.41585e+06	4.12051e+06	1.12557e+06	1.24381e+06	1.44258e+06	7.95378e+06	1.63097e+07	5.86525e+06	1
P20042	Eukaryotic translation initiation factor 2 subunit 2 OS=Homo sapiens OX=9606 GN=EIF2S2 PE=1 SV=2	0	64.94	45	14	274	14	333	38.4	5.8	131.12	14	0	1.208	1.114	0.959029	0.90071	27.56	32.05	111.5	89.5	98.9	11.49	11.32	6.93	7.8076e+07	8.73032e+07	85027534	6.21781e+07	7.22726e+07	6.04254e+07	5.86811e+07	2.5263e+07	4.60108e+07	7.8076e+07	9.02547e+07	9.83599e+07	7.2429e+07	8.30314e+07	6.65032e+07	8.9331e+07	7.8853e+07	8.00528e+07	1
Q8IWZ3	Ankyrin repeat and KH domain-containing protein 1 OS=Homo sapiens OX=9606 GN=ANKHD1 PE=1 SV=1	0	64.934	9	17	295	9	2542	269.3	5.73	118.15	17	4	1.748	0.991	0.465401	0.992464	41.1	28.17	118.4	103.2	78.3	12.02	16.41	21.11	2.33534e+07	2.18861e+07	1.60402e+07	1.95812e+07	1.4248e+07	1.79171e+07	1.25663e+07	4.04897e+06	8.60195e+06	2.33534e+07	2.2626e+07	1.85553e+07	2.28094e+07	1.6369e+07	1.97193e+07	1.91299e+07	1.2638e+07	1.49663e+07	1
Q96QK1	Vacuolar protein sorting-associated protein 35 OS=Homo sapiens OX=9606 GN=VPS35 PE=1 SV=2	0	64.91	24	16	200	16	796	91.6	5.49	94.37	16	0	1.006	1.128	0.967525	0.850254	35.47	40.47	101.7	101.8	96.4	11.03	26.25	10.14	1.04116e+07	1.0701e+07	1.11082e+07	6.19294e+06	9.63534e+06	1.12429e+07	6.01553e+06	3.35985e+06	6.44618e+06	1.04116e+07	1.10627e+07	1.285e+07	7.21392e+06	1.10697e+07	1.23738e+07	9.15752e+06	1.0487e+07	1.12155e+07	1
P38646	Stress-70 protein, mitochondrial OS=Homo sapiens OX=9606 GN=HSPA9 PE=1 SV=2	0	64.871	25	16	310	16	679	73.6	6.16	162.65	16	0	1.456	1.76	0.799004	0.00494263	24.98	27.24	132.4	92.5	75.1	15	7.25	14.72	7.77565e+07	8.17821e+07	8.93793e+07	4.95136e+07	5.13766e+07	5.98808e+07	2.97098e+07	1.90059e+07	2.75474e+07	7.77565e+07	8.45469e+07	1.03394e+08	5.76766e+07	5.90248e+07	6.59038e+07	4.52276e+07	5.93226e+07	4.79289e+07	1
P05141	ADP/ATP translocase 2 OS=Homo sapiens OX=9606 GN=SLC25A5 PE=1 SV=7	0	64.865	47	15	651	6	298	32.8	9.69	348.24	15	7	1.537	1.054	0.710352	0.954745	18.48	27.23	119.5	75.3	105.2	6.97	11.14	9.83	6.81268e+08	7.41606e+08	6.6938e+08	402066856	4.98731e+08	4.38991e+08	4.43365e+08	2.55269e+08	3.87977e+08	6.81268e+08	7.66677e+08	7.7434e+08	4.68353e+08	5.72975e+08	4.83146e+08	6.7494e+08	7.96765e+08	6.7503e+08	1
Q9UQ88	Cyclin-dependent kinase 11A OS=Homo sapiens OX=9606 GN=CDK11A PE=1 SV=4	0	64.784	20	17	377	2	783	91.3	5.36	163.03	17	0																															1
Q14145	Kelch-like ECH-associated protein 1 OS=Homo sapiens OX=9606 GN=KEAP1 PE=1 SV=2	0	64.713	29	15	248	15	624	69.6	6.44	125.85	15	0	0.902	0.96	0.92694	0.980641	16.97	20.2	94.5	108.7	96.8	4.68	3.29	13.49	2.88355e+07	2.94661e+07	2.40032e+07	2.98646e+07	2.8436e+07	3.01581e+07	2.03509e+07	7.62871e+06	1.69821e+07	2.88355e+07	3.04622e+07	2.77669e+07	3.47881e+07	3.26692e+07	3.31915e+07	3.09804e+07	2.38114e+07	2.95467e+07	1
Q9UJS0	Electrogenic aspartate/glutamate antiporter SLC25A13, mitochondrial OS=Homo sapiens OX=9606 GN=SLC25A13 PE=1 SV=2	0	64.679	28	16	237	11	675	74.1	8.62	117.99	16	5	1.551	0.932	0.691861	0.956845	26.11	28.77	116.8	64.4	118.8	8.41	14.27	7.41	2.37809e+07	2.67547e+07	2.38405e+07	1.1404e+07	1.53733e+07	1.38094e+07	1.83575e+07	1.01706e+07	1.61165e+07	2.37809e+07	2.76592e+07	2.75787e+07	1.32841e+07	1.76619e+07	1.51984e+07	2.79458e+07	3.17454e+07	2.80406e+07	1
Q8NC51	SERPINE1 mRNA-binding protein 1 OS=Homo sapiens OX=9606 GN=SERBP1 PE=1 SV=2	0	64.647	35	15	325	15	408	44.9	8.65	144.1	15	0	2.058	1.243	0.182224	0.582858	31.64	37.74	129.6	68	102.4	3.66	17.17	4.97	5.20972e+07	5.35378e+07	4.81548e+07	3.17656e+07	2.34324e+07	2.63722e+07	2.87062e+07	1.45501e+07	2.36377e+07	5.20972e+07	5.53478e+07	5.57055e+07	3.70026e+07	2.69207e+07	2.90249e+07	4.36998e+07	4.54151e+07	4.11265e+07	1
P04899	Guanine nucleotide-binding protein G(i) subunit alpha-2 OS=Homo sapiens OX=9606 GN=GNAI2 PE=1 SV=3	0	64.494	41	12	272	10	355	40.4	5.54	114.64	12	2	1.173	1.113	0.965964	0.90071	27.76	30.95	103.9	103.1	93	10.52	11.36	10.53	4.90515e+07	5.62346e+07	4.18028e+07	3.52219e+07	4.46605e+07	4.42157e+07	3.10827e+07	1.22745e+07	2.52334e+07	4.90515e+07	5.81357e+07	4.83576e+07	4.10286e+07	5.13089e+07	4.86631e+07	4.73175e+07	3.83122e+07	4.39029e+07	1
P48634	Protein PRRC2A OS=Homo sapiens OX=9606 GN=PRRC2A PE=1 SV=3	0	64.383	11	16	172	16	2157	228.7	9.45	53.31	16	0	1.64	1.246	0.604033	0.505762	16.72	20.59	133.4	69.6	97	19.72	5.22	16.14	14581234	1.56744e+07	1.82683e+07	7.0611e+06	7.35563e+06	8.2589e+06	7.23247e+06	4.75514e+06	6.77538e+06	14581234	1.62043e+07	2.11328e+07	8.22522e+06	8.45063e+06	9.08962e+06	1.10101e+07	1.48421e+07	1.17883e+07	1
P0CG39	POTE ankyrin domain family member J OS=Homo sapiens OX=9606 GN=POTEJ PE=3 SV=1	0	64.38	7	6	1249	1	1038	117.3	5.97	551	6	0																															1
Q15233	Non-POU domain-containing octamer-binding protein OS=Homo sapiens OX=9606 GN=NONO PE=1 SV=4	0	64.254	26	12	290	11	471	54.2	8.95	135.11	12	0	1.662	1.247	0.574846	0.568461	40.41	27.67	120.5	81.1	98.4	12.8	5.35	5.57	6.73887e+07	8.34286e+07	6.31897e+07	4.22263e+07	3.98432e+07	4.62271e+07	3.92144e+07	1.98433e+07	3.18755e+07	6.73887e+07	8.6249e+07	7.3098e+07	4.91879e+07	4.57745e+07	5.08768e+07	5.96966e+07	6.19367e+07	5.54593e+07	1
P21127	Cyclin-dependent kinase 11B OS=Homo sapiens OX=9606 GN=CDK11B PE=1 SV=4	0	64.158	19	17	384	2	795	92.6	5.54	165.1	17	11	1.102	0.889	0.994469	0.908189	21.4	21.95	97.2	87.3	115.4	6.91	7.61	14.4	3.02985e+07	3.20931e+07	3.00468e+07	2.55822e+07	2.87182e+07	2.58864e+07	2.58633e+07	1.58805e+07	2.21821e+07	3.02985e+07	3.31781e+07	3.47582e+07	2.97998e+07	3.29933e+07	2.84902e+07	3.93721e+07	4.95675e+07	3.8594e+07	1
Q86VP6	Cullin-associated NEDD8-dissociated protein 1 OS=Homo sapiens OX=9606 GN=CAND1 PE=1 SV=2	0	64.112	17	16	252	16	1230	136.3	5.78	90.28	16	0	1.136	0.927	0.976582	0.970447	27.54	37.29	78.7	111.9	109.4	13.33	6.79	24.19	1.09859e+07	9.54169e+06	7.25681e+06	1.08399e+07	1.22046e+07	1.30726e+07	9.08508e+06	4.38967e+06	5.00369e+06	1.09859e+07	9.86426e+06	8.39469e+06	1.26271e+07	1.40215e+07	1.43875e+07	1.38303e+07	1.37014e+07	8.70577e+06	1
Q9BUQ8	Probable ATP-dependent RNA helicase DDX23 OS=Homo sapiens OX=9606 GN=DDX23 PE=1 SV=3	0	64.107	21	15	320	15	820	95.5	9.55	127.39	15	0	0.905	1.148	0.929522	0.842358	19.93	22.99	84.2	106.8	109	25.74	16.34	7.96	157779402	1.30235e+08	1.8986e+08	1.27461e+08	1.74522e+08	1.81742e+08	1.26433e+08	6.5405e+07	1.29343e+08	157779402	1.34637e+08	2.1963e+08	1.48475e+08	2.00502e+08	2.00022e+08	1.9247e+08	2.04147e+08	2.25041e+08	1
Q8NDV7	Trinucleotide repeat-containing gene 6A protein OS=Homo sapiens OX=9606 GN=TNRC6A PE=1 SV=2	0	64.084	12	15	140	14	1962	210.2	7.01	55.98	15	1	1.911	0.556	0.295161	0.0111063	29.47	38.63	81	33.5	185.4	21.34	20.9	39.6	6.72293e+06	6.89379e+06	8.48842e+06	2.12045e+06	2.56846e+06	3.39224e+06	1.07163e+07	9.03798e+06	7.93055e+06	6.72293e+06	7.12685e+06	9.81941e+06	2.47003e+06	2.95081e+06	3.73345e+06	1.63136e+07	2.82101e+07	1.37981e+07	1
P62136	Serine/threonine-protein phosphatase PP1-alpha catalytic subunit OS=Homo sapiens OX=9606 GN=PPP1CA PE=1 SV=1	0	64.061	50	12	307	3	330	37.5	6.33	117.81	12	8	0.906	0.789	0.929522	0.58944	25.3	23.17	96.3	94.1	109.6	9.11	20.23	16.17	3.28209e+07	2.94095e+07	3.14835e+07	2.23291e+07	2.79039e+07	3.55295e+07	2.45387e+07	1.55264e+07	2.11011e+07	3.28209e+07	3.04037e+07	3.64201e+07	2.60103e+07	3.20578e+07	3.91032e+07	3.73555e+07	4.84624e+07	3.67132e+07	1
Q6ZW31	Rho GTPase-activating protein SYDE1 OS=Homo sapiens OX=9606 GN=SYDE1 PE=1 SV=1	0	63.741	29	16	205	16	735	79.7	8.43	66.69	16	0	0.925	0.88	0.930685	0.918936	21.73	30.56	95	100.8	104.2	10.44	12.21	18.64	1.11247e+07	9.83398e+06	1.08114e+07	1.0127e+07	9.42041e+06	1.24747e+07	8.01388e+06	5.16995e+06	6.64432e+06	1.11247e+07	1.01664e+07	1.25066e+07	1.17965e+07	1.08228e+07	1.37294e+07	1.21996e+07	1.61369e+07	1.15603e+07	1
Q8IY17	Patatin-like phospholipase domain-containing protein 6 OS=Homo sapiens OX=9606 GN=PNPLA6 PE=1 SV=3	0	63.733	18	19	274	19	1375	150.9	7.74	114.4	19	0	0.978	0.957	0.965964	0.980177	20.63	23.45	104.7	101.3	94	4.13	3.72	21.78	2.58834e+07	2.70534e+07	2.38964e+07	2.19103e+07	2.39184e+07	2.43149e+07	1.33994e+07	1.00804e+07	1.42749e+07	2.58834e+07	2.7968e+07	2.76433e+07	2.55225e+07	2.7479e+07	2.67605e+07	2.03981e+07	3.14637e+07	2.48365e+07	1
Q14137	Ribosome biogenesis protein BOP1 OS=Homo sapiens OX=9606 GN=BOP1 PE=1 SV=2	0	63.589	27	13	243	13	746	83.6	6.19	97.51	13	0	1.154	0.969	0.967525	0.991911	21.32	23.29	124	81.1	94.9	4.76	20.23	7.6	30397149	2.90824e+07	2.4051e+07	1.5803e+07	2.30559e+07	1.78521e+07	1.56337e+07	7.37103e+06	1.18001e+07	30397149	3.00656e+07	2.78222e+07	1.84083e+07	2.64881e+07	1.96477e+07	2.37994e+07	2.30071e+07	2.05307e+07	1
Q9UG63	ATP-binding cassette sub-family F member 2 OS=Homo sapiens OX=9606 GN=ABCF2 PE=1 SV=2	0	63.582	28	16	317	16	623	71.2	7.37	153.58	16	0	1.646	1.036	0.597331	0.970447	32.18	21.22	114.1	71.6	114.3	3	21.38	10.29	4.32141e+07	4.35332e+07	3.96272e+07	2.42337e+07	1.68582e+07	2.67233e+07	2.96221e+07	1.20183e+07	2.59208e+07	4.32141e+07	4.5005e+07	4.58408e+07	2.82289e+07	1.93678e+07	2.94112e+07	4.50941e+07	3.75124e+07	4.50988e+07	1
Q9NW13	RNA-binding protein 28 OS=Homo sapiens OX=9606 GN=RBM28 PE=1 SV=3	0	63.556	23	16	258	16	759	85.7	9.22	99.12	16	0	1.01	1.024	0.968239	0.969162	11.75	18.3	98.4	96	105.7	12.95	5.98	10.95	1.52237e+07	14670300	1.63188e+07	1.28409e+07	1.16776e+07	1.34983e+07	1.0426e+07	5.23996e+06	1.11191e+07	1.52237e+07	1.51663e+07	1.88776e+07	1.49579e+07	1.34159e+07	1.4856e+07	1.58717e+07	1.63554e+07	1.93458e+07	1
Q13637	Ras-related protein Rab-32 OS=Homo sapiens OX=9606 GN=RAB32 PE=1 SV=3	0	63.493	73	14	438	12	225	25	6.54	219.18	14	1	1.029	0.864	0.9773	0.860198	22.64	29.86	99.7	95.4	104.9	8.23	11.57	18.65	5.23484e+07	5.68813e+07	5.32413e+07	4.18513e+07	4.90136e+07	5.59027e+07	3.47485e+07	24495911	3.55736e+07	5.23484e+07	5.88043e+07	6.15896e+07	4.87511e+07	5.63101e+07	6.15256e+07	5.28981e+07	7.64587e+07	6.18935e+07	1
Q96PU5	E3 ubiquitin-protein ligase NEDD4-like OS=Homo sapiens OX=9606 GN=NEDD4L PE=1 SV=2	0	63.287	20	17	312	13	975	111.9	5.82	144.93	17	3	1.22	0.959	0.944469	0.992464	27.78	25.41	98.8	81.9	119.3	2.51	11.7	18.68	2.08208e+07	19774675	17125746	1.38258e+07	1.47598e+07	1.82112e+07	1.66932e+07	5.69016e+06	1.4194e+07	2.08208e+07	2.04432e+07	1.98111e+07	1.61052e+07	1.69571e+07	2.00429e+07	2.54122e+07	1.77606e+07	2.46958e+07	1
P55795	Heterogeneous nuclear ribonucleoprotein H2 OS=Homo sapiens OX=9606 GN=HNRNPH2 PE=1 SV=1	0	63.224	32	11	744	5	449	49.2	6.3	389.4	11	0	0.917	0.638	0.930685	0.102511	26.6	46.76	102.5	39.7	157.8	30.26	46.47	49.86	4.87328e+06	4.90554e+06	7.02283e+06	1.11547e+06	2.86811e+06	1.78566e+06	4.69573e+06	5.2932e+06	4.48834e+06	4.87328e+06	5.07138e+06	8.12402e+06	1.29937e+06	3.29507e+06	1.96527e+06	7.14836e+06	1.65216e+07	7.80913e+06	1
P05388	Large ribosomal subunit protein uL10 OS=Homo sapiens OX=9606 GN=RPLP0 PE=1 SV=1	0	63.207	45	11	673	11	317	34.3	5.97	295.29	11	0	1.434	1.087	0.827284	0.922241	22.6	33.45	115.2	82.5	102.3	0.99	1.46	3.59	4.05187e+08	3.85244e+08	3.50224e+08	2.49173e+08	2.48014e+08	2.66502e+08	2.36233e+08	1.14351e+08	2.18926e+08	4.05187e+08	3.98268e+08	4.0514e+08	2.90252e+08	2.84934e+08	2.93308e+08	3.5962e+08	3.56922e+08	3.80903e+08	1
P14649	Myosin light chain 6B OS=Homo sapiens OX=9606 GN=MYL6B PE=1 SV=1	0	63.152	63	10	820	7	208	22.8	5.73	443.48	10	0	0.748	1.115	0.687522	0.862273	26.96	35.18	91.7	126.8	81.5	16.43	4.77	25.29	16635013	1.31956e+07	1.04343e+07	1.53798e+07	16412021	1.79084e+07	8.88317e+06	2.58003e+06	6.96217e+06	16635013	1.36417e+07	1.20705e+07	1.79154e+07	1.88552e+07	1.97097e+07	1.3523e+07	8.053e+06	1.21133e+07	1
Q9Y3I0	RNA-splicing ligase RtcB homolog OS=Homo sapiens OX=9606 GN=RTCB PE=1 SV=1	0	63.125	36	15	304	15	505	55.2	7.23	130.03	15	0	0.743	0.706	0.687522	0.213104	24.71	33.62	80.7	110.4	108.9	13.15	8.4	15.46	3.89545e+07	4.23982e+07	4.37408e+07	5.09048e+07	5.98047e+07	5.44487e+07	3.81705e+07	2.42896e+07	3.39775e+07	3.89545e+07	4.38315e+07	5.05994e+07	5.92971e+07	6.87076e+07	5.99253e+07	5.81075e+07	7.58148e+07	5.91165e+07	1
Q86UE4	Protein LYRIC OS=Homo sapiens OX=9606 GN=MTDH PE=1 SV=2	0	63.078	38	15	179	15	582	63.8	9.32	68.4	15	0	1.97	0.952	0.251299	0.986757	19.64	21.47	128.5	46.6	124.9	13.33	3.06	5.23	1.8267e+07	2.04143e+07	2.06517e+07	6.90232e+06	6.6556e+06	6.91722e+06	1.24051e+07	6.67951e+06	1.17897e+07	1.8267e+07	2.11044e+07	2.389e+07	8.04025e+06	7.64639e+06	7.61298e+06	1.88844e+07	2.08486e+07	2.05126e+07	1
P62753	Small ribosomal subunit protein eS6 OS=Homo sapiens OX=9606 GN=RPS6 PE=1 SV=1	0	63.029	42	13	656	13	249	28.7	10.84	359.04	13	0	1.492	1.273	0.750409	0.485909	29.85	36.87	110.1	79.9	110	6.59	5.73	3.57	3.8684e+08	3.73785e+08	3.73883e+08	2.57132e+08	2.44387e+08	2.4285e+08	2.62082e+08	1.19018e+08	2.2199e+08	3.8684e+08	3.86421e+08	4.32508e+08	2.99523e+08	2.80768e+08	2.67277e+08	3.98971e+08	3.71489e+08	3.86233e+08	1
P34931	Heat shock 70 kDa protein 1-like OS=Homo sapiens OX=9606 GN=HSPA1L PE=1 SV=2	0	62.512	27	13	374	2	641	70.3	6.02	182.84	13	0																															1
Q13823	Nucleolar GTP-binding protein 2 OS=Homo sapiens OX=9606 GN=GNL2 PE=1 SV=1	0	62.193	19	14	208	14	731	83.6	9.25	79.22	14	0	1.332	1.099	0.899689	0.90923	13.79	22.04	112.8	84.6	102.6	4.74	4.71	7.97	3.1032e+07	3.01718e+07	2.91632e+07	2.00879e+07	1.95004e+07	2.23602e+07	1.86427e+07	8.26884e+06	1.74048e+07	3.1032e+07	3.11918e+07	3.37361e+07	2.33996e+07	2.24033e+07	2.46093e+07	2.838e+07	2.58094e+07	3.0282e+07	1
O75420	GRB10-interacting GYF protein 1 OS=Homo sapiens OX=9606 GN=GIGYF1 PE=1 SV=2	0	61.946	17	13	248	13	1035	114.5	5.39	110.19	13	0	1.716	0.565	0.5017	0.0069276	25.08	32.49	33.1	20.6	246.3	34.78	5.67	70.25	1.04416e+07	1.01961e+07	1.59056e+07	5.49404e+06	5.70193e+06	6.46807e+06	1.85636e+07	4.687e+07	4.50781e+07	1.04416e+07	1.05408e+07	1.83996e+07	6.3998e+06	6.55075e+06	7.11866e+06	2.82596e+07	1.46294e+08	7.84301e+07	1
Q9P265	Disco-interacting protein 2 homolog B OS=Homo sapiens OX=9606 GN=DIP2B PE=1 SV=3	0	61.919	14	17	232	15	1576	171.4	8.09	84.69	17	2	0.774	1.012	0.74203	0.974248	18.26	25.14	88.8	117.4	93.8	11.65	13.33	4.57	1.00668e+07	1.23098e+07	9.88973e+06	1.20085e+07	1.31604e+07	1.63996e+07	7.93194e+06	3.72496e+06	7.31652e+06	1.00668e+07	1.27259e+07	1.14405e+07	1.39883e+07	1.51196e+07	1.80491e+07	1.20749e+07	1.16267e+07	1.27298e+07	1
P38935	DNA-binding protein SMUBP-2 OS=Homo sapiens OX=9606 GN=IGHMBP2 PE=1 SV=3	0	61.904	23	15	186	15	993	109.1	8.97	58.48	15	0	1.184	1.07	0.965964	0.922318	22.55	22.87	124	82	94.1	13.93	21.45	57.22	7.48407e+06	9.36827e+06	8.28348e+06	5.43907e+06	5.32688e+06	8.0516e+06	5.8882e+06	706221	4180854	7.48407e+06	9.68498e+06	9.58234e+06	6.33578e+06	6.11987e+06	8.86146e+06	8.96368e+06	2.20432e+06	7.27414e+06	1
Q86TB9	Protein PAT1 homolog 1 OS=Homo sapiens OX=9606 GN=PATL1 PE=1 SV=2	0	61.837	19	13	266	13	770	86.8	6.67	123.62	13	0	1.547	0.52	0.696589	0.00111253	29.8	34.28	86.6	62.3	151.1	19.54	5.32	38.71	2.81679e+07	2.97797e+07	3.49774e+07	1.9026e+07	1.7713e+07	2.0433e+07	3.45574e+07	3.17466e+07	3.08974e+07	2.81679e+07	3.07865e+07	4.04619e+07	2.21627e+07	2.03498e+07	2.24882e+07	5.26071e+07	9.909e+07	5.37574e+07	1
Q9UJM3	ERBB receptor feedback inhibitor 1 OS=Homo sapiens OX=9606 GN=ERRFI1 PE=1 SV=1	0	61.821	32	12	179	12	462	50.5	8.1	42.88	12	0	4.267	0.49	2.03871e-05	0.000321181	6.26	39.95	98.1	2.7	199.2	12.4	55.08	45.3	1.5104e+07	1.40713e+07	1.02783e+07	514525	229210		1.94035e+07	1.56019e+07	1.12805e+07	1.5104e+07	1.4547e+07	1.189e+07	599351	263331		2.95381e+07	4.8698e+07	1.96267e+07	1
P55072	Transitional endoplasmic reticulum ATPase OS=Homo sapiens OX=9606 GN=VCP PE=1 SV=4	0	61.433	29	16	189	16	806	89.3	5.26	68.24	16	0	1.119	0.792	0.985529	0.635521	21.51	37.99	112.1	100.6	87.3	30.17	5.98	40.18	1.22797e+07	2.11138e+07	1.9356e+07	1.68227e+07	1.72536e+07	1.61245e+07	1.11263e+07	1.03646e+07	9.77572e+06	1.22797e+07	2.18276e+07	2.23911e+07	1.95961e+07	1.98221e+07	1.77464e+07	1.69377e+07	3.2351e+07	1.70085e+07	1
O00160	Unconventional myosin-If OS=Homo sapiens OX=9606 GN=MYO1F PE=1 SV=3	0	61.288	8	11	353	0	1098	124.8	9.11	177.4	11	0																															0
P08195	Amino acid transporter heavy chain SLC3A2 OS=Homo sapiens OX=9606 GN=SLC3A2 PE=1 SV=3	0	61.252	24	14	328	14	630	68	5.01	154.17	14	0	0.858	1.139	0.886786	0.860198	28.16	21.77	101	120.2	78.8	9.04	4.05	5.48	87297892	7.60674e+07	6.31057e+07	82982322	7.75965e+07	8.49756e+07	4.0294e+07	2.15045e+07	3.50268e+07	87297892	7.8639e+07	7.30007e+07	9.6663e+07	8.91479e+07	9.35228e+07	6.13401e+07	6.71216e+07	6.0942e+07	1
Q3ZCM7	Tubulin beta-8 chain OS=Homo sapiens OX=9606 GN=TUBB8 PE=1 SV=2	0	61.135	23	10	847	1	444	49.7	4.89	416.63	10	0																															1
Q9NY65	Tubulin alpha-8 chain OS=Homo sapiens OX=9606 GN=TUBA8 PE=1 SV=1	0	61.092	27	9	407	1	449	50.1	5.06	183.17	9	0																															1
P30050	Large ribosomal subunit protein uL11 OS=Homo sapiens OX=9606 GN=RPL12 PE=1 SV=1	0	60.971	70	9	717	9	165	17.8	9.42	341.37	9	0	1.418	1.129	0.84406	0.868331	13.88	17.9	115.8	80.2	104	0.89	4.04	10.2	8.36196e+08	7.9463e+08	7.17866e+08	5.20434e+08	5.00714e+08	5.09076e+08	4.98821e+08	2.01008e+08	4.28408e+08	8.36196e+08	8.21494e+08	8.30428e+08	6.06235e+08	5.75253e+08	5.60281e+08	7.59362e+08	6.27402e+08	7.45374e+08	1
Q9Y450	HBS1-like protein OS=Homo sapiens OX=9606 GN=HBS1L PE=1 SV=1	0	60.964	29	14	307	14	684	75.4	6.61	135.21	14	0	1.371	0.622	0.877845	0.0397483	40.03	43.67	97.2	61.2	141.6	22.62	10.68	33.87	2.55429e+07	3.08187e+07	3.47649e+07	1.68983e+07	2.06942e+07	1.82229e+07	2.53377e+07	2.3243e+07	2.66864e+07	2.55429e+07	3.18606e+07	4.0216e+07	1.96842e+07	2.37748e+07	2.00558e+07	3.85718e+07	7.25479e+07	4.64309e+07	1
Q6P996	Pyridoxal-dependent decarboxylase domain-containing protein 1 OS=Homo sapiens OX=9606 GN=PDXDC1 PE=1 SV=2	0	60.806	22	15	172	15	788	86.7	5.38	59.24	15	0	0.764	0.906	0.717304	0.954745	21.88	24.85	95.9	114	90.1	7.77	13.52	10.81	1.10456e+07	1.24672e+07	1.02089e+07	1.20425e+07	1.33789e+07	1.06387e+07	7.28525e+06	3.2203e+06	7.16492e+06	1.10456e+07	1.28887e+07	1.18097e+07	1.40279e+07	1.53706e+07	1.17088e+07	1.10904e+07	1.00515e+07	1.2466e+07	1
Q27J81	Inverted formin-2 OS=Homo sapiens OX=9606 GN=INF2 PE=1 SV=2	0	60.8	17	14	126	14	1249	135.5	5.38	54.8	14	0	0.89	0.915	0.908111	0.992464	20.48	30.45	95.6	128.7	75.6	21.14	37.99	8.85	2.67863e+06	2.81838e+06	1.64612e+06	3.49038e+06	3.13936e+06	1.63336e+06	1.21848e+06	706337	1.21795e+06	2.67863e+06	2.91366e+06	1.90423e+06	4.06581e+06	3.6067e+06	1.79765e+06	1.8549e+06	2.20468e+06	2.11907e+06	1
P46060	Ran GTPase-activating protein 1 OS=Homo sapiens OX=9606 GN=RANGAP1 PE=1 SV=1	0	60.795	29	14	208	14	587	63.5	4.68	77.04	14	0	1.061	0.742	0.995177	0.384738	17.59	28.79	97.4	76.7	125.8	13.48	20.12	16.17	1.45262e+07	1.79637e+07	1.6002e+07	1.25182e+07	1.43074e+07	9.91324e+06	1.55297e+07	9968392	1.37403e+07	1.45262e+07	1.85709e+07	1.85111e+07	1.4582e+07	1.64372e+07	1.09104e+07	2.36411e+07	3.11142e+07	2.39063e+07	1
O94973	AP-2 complex subunit alpha-2 OS=Homo sapiens OX=9606 GN=AP2A2 PE=1 SV=2	0	60.629	21	12	322	6	939	103.9	6.96	170.9	12	0	1.036	1.283	0.98381	0.421109	10.79	28.19	138.3	108.1	53.6	2.22	20.65	26.22	9643704	9.43725e+06	8.07817e+06	5.77435e+06	8643129	6848804	3.19118e+06	916184	2.14983e+06	9643704	9.75629e+06	9.34483e+06	6.72633e+06	9.92979e+06	7.53769e+06	4.85798e+06	2.85967e+06	3.74043e+06	1
P38919	Eukaryotic initiation factor 4A-III OS=Homo sapiens OX=9606 GN=EIF4A3 PE=1 SV=4	0	60.51	29	13	271	12	411	46.8	6.73	136.36	13	1	1.084	1.085	0.998872	0.908189	23.93	34.72	116	96.1	88	13.85	5.13	8.37	2.02554e+07	2.35675e+07	2.31473e+07	1.74609e+07	1.6118e+07	1.83365e+07	1.21415e+07	6.77486e+06	1.04791e+07	2.02554e+07	2.43643e+07	2.67769e+07	2.03396e+07	1.85175e+07	2.01808e+07	1.84832e+07	2.11462e+07	1.82323e+07	1
P26639	Threonine--tRNA ligase 1, cytoplasmic OS=Homo sapiens OX=9606 GN=TARS1 PE=1 SV=3	0	60.321	27	15	268	15	723	83.4	6.67	121.38	15	0	1.207	1.107	0.959829	0.905467	34.21	29.19	114.1	93.6	92.4	20.53	4.48	7.78	2.66187e+07	3.91669e+07	3.04522e+07	2.57617e+07	2.38839e+07	2.62487e+07	1.84696e+07	9.13808e+06	1.85625e+07	2.66187e+07	4.0491e+07	3.52271e+07	3.00089e+07	2.74394e+07	2.88889e+07	2.81165e+07	2.85225e+07	3.22963e+07	1
Q53EZ4	Centrosomal protein of 55 kDa OS=Homo sapiens OX=9606 GN=CEP55 PE=1 SV=3	0	60.268	32	13	151	13	464	54.1	7.01	61.12	13	0	2.138	1.073	0.139025	0.922241	36.87	21.36	142.5	31.4	126.1	10.89	25.73	12.72	1.41302e+07	1.10564e+07	1.17046e+07	2.49338e+06	2.59957e+06	4.07538e+06	7.8729e+06	3.09296e+06	7.05739e+06	1.41302e+07	1.14302e+07	1.35399e+07	2.90445e+06	2.98656e+06	4.48529e+06	1.1985e+07	9.654e+06	1.22789e+07	1
Q9Y4P3	Transducin beta-like protein 2 OS=Homo sapiens OX=9606 GN=TBL2 PE=1 SV=1	0	60.052	31	15	247	15	447	49.8	9.44	104.59	15	0	2.463	1.037	0.0407114	0.956845	18.74	21.9	133.5	45.5	121.1	12.14	5.37	10.82	19260893	2.3101e+07	2.07918e+07	6.98274e+06	7.30358e+06	6.85979e+06	1.61572e+07	6.36647e+06	1.24527e+07	19260893	2.38819e+07	2.4052e+07	8.13394e+06	8.39083e+06	7.54978e+06	2.45964e+07	1.98716e+07	2.16661e+07	1
Q8TDM6	Disks large homolog 5 OS=Homo sapiens OX=9606 GN=DLG5 PE=1 SV=4	0	59.969	12	19	98	19	1919	213.7	7.42	31.88	19	0	1.362	0.841	0.880164	0.870628	37.87	36.93	113	70.6	116.4	7.73	12.88	5.3	5.48063e+06	5.99948e+06	5.48825e+06	3.45433e+06	2.73238e+06	3.52156e+06	4.19642e+06	1.92216e+06	3833599	5.48063e+06	6.2023e+06	6.34881e+06	4.02382e+06	3.13914e+06	3.87577e+06	6.38826e+06	5.99959e+06	6.66997e+06	1
Q9Y4X5	E3 ubiquitin-protein ligase ARIH1 OS=Homo sapiens OX=9606 GN=ARIH1 PE=1 SV=2	0	59.772	23	13	252	13	557	64.1	5.08	127.22	13	0	1.093	0.514	0.995287	0.000848671	29.09	41	75.9	72.7	151.5	24.76	9.86	35.16	3.21545e+07	4.44259e+07	4.63388e+07	3.25614e+07	3.82996e+07	4.18026e+07	4.74509e+07	4.53832e+07	5.26996e+07	3.21545e+07	4.59277e+07	5.36048e+07	3.79296e+07	4.40011e+07	4.60073e+07	7.22351e+07	1.41654e+08	9.16906e+07	1
P08243	Asparagine synthetase [glutamine-hydrolyzing] OS=Homo sapiens OX=9606 GN=ASNS PE=1 SV=4	0	59.728	30	15	238	15	561	64.3	6.86	106.85	15	0	1.335	0.935	0.896664	0.958844	21.34	19.09	110.1	72.5	117.5	13.85	13.31	4.38	2.34628e+07	2.9998e+07	2.44185e+07	1.50281e+07	1.61837e+07	2.03985e+07	1.85697e+07	9.85883e+06	1.7323e+07	2.34628e+07	3.10121e+07	2.82474e+07	1.75056e+07	1.85929e+07	2.24502e+07	2.82689e+07	3.07722e+07	3.01398e+07	1
Q92945	Far upstream element-binding protein 2 OS=Homo sapiens OX=9606 GN=KHSRP PE=1 SV=4	0	59.698	28	14	193	14	711	73.1	7.3	74.19	14	0	0.925	0.587	0.930685	0.0138714	23.05	23.11	79.5	91.8	128.7	17.97	12.88	38.74	1.27811e+07	1.26783e+07	1.5067e+07	1.12071e+07	1.31714e+07	1.53768e+07	1.39457e+07	1.26397e+07	1.21239e+07	1.27811e+07	1.31069e+07	1.74295e+07	1.30547e+07	1.51322e+07	1.69235e+07	2.12298e+07	3.9452e+07	2.10941e+07	1
Q9Y224	RNA transcription, translation and transport factor protein OS=Homo sapiens OX=9606 GN=RTRAF PE=1 SV=1	0	59.666	51	14	229	14	244	28.1	6.65	112.68	14	0	0.748	0.908	0.687522	0.932667	35.84	38.48	92	117.8	90.3	16.11	18.19	18.26	3.22502e+07	2.83349e+07	3.44482e+07	3.233e+07	4.61119e+07	3.75299e+07	2.07992e+07	1.35924e+07	17845908	3.22502e+07	2.92928e+07	3.98497e+07	3.766e+07	5.29764e+07	4.13048e+07	3.16629e+07	4.24258e+07	3.10496e+07	1
O95905	Protein ecdysoneless homolog OS=Homo sapiens OX=9606 GN=ECD PE=1 SV=1	0	59.635	25	13	187	13	644	72.7	4.87	67.97	13	0	1.328	1.228	0.901337	0.55653	19.01	25.5	115.2	104.1	80.6	14.31	17.55	11.38	1.67362e+07	2.02721e+07	1.40847e+07	1.00661e+07	13163651	1.51859e+07	8.49586e+06	3.29532e+06	6.73125e+06	1.67362e+07	2.09574e+07	1.62932e+07	1.17256e+07	1.51233e+07	1.67134e+07	1.29334e+07	1.02856e+07	1.17115e+07	1
Q6DD88	Atlastin-3 OS=Homo sapiens OX=9606 GN=ATL3 PE=1 SV=1	0	59.593	31	13	117	13	541	60.5	5.66	45.17	13	0	0.987	1.035	0.965964	0.954745	27.15	40.73	102.9	102.1	95	3.97	28.67	20.68	1.43814e+07	1.29666e+07	1.16453e+07	7.97598e+06	1.46501e+07	1.2151e+07	5.56609e+06	3.99631e+06	7.15487e+06	1.43814e+07	1.34049e+07	1.34713e+07	9.29093e+06	1.6831e+07	1.33732e+07	8.47334e+06	1.24736e+07	1.24485e+07	1
P62913	Large ribosomal subunit protein uL5 OS=Homo sapiens OX=9606 GN=RPL11 PE=1 SV=2	0	59.527	57	11	380	11	178	20.2	9.6	174.2	11	0	1.291	1.175	0.925757	0.771209	21.34	31.02	113.2	83.1	103.7	5.9	5.43	8.08	2.86137e+08	2.53252e+08	2.21687e+08	181045714	1.67427e+08	1.74526e+08	1.57542e+08	6.66217e+07	1.38086e+08	2.86137e+08	2.61814e+08	2.56448e+08	2.10893e+08	1.92351e+08	1.92081e+08	2.39828e+08	2.07945e+08	2.40252e+08	1
P08237	ATP-dependent 6-phosphofructokinase, muscle type OS=Homo sapiens OX=9606 GN=PFKM PE=1 SV=2	0	59.519	18	14	294	12	780	85.1	7.99	134.22	14	0	0.854	0.83	0.881463	0.824785	18.21	31.39	88.9	107.7	103.5	15.48	3.95	4.58	1.03623e+07	1.25555e+07	1.22196e+07	1.27231e+07	1.39193e+07	1.42859e+07	9.92757e+06	5.04747e+06	8.26189e+06	1.03623e+07	1.29799e+07	1.41356e+07	1.48207e+07	1.59914e+07	1.57229e+07	1.51129e+07	1.57546e+07	1.43746e+07	1
P27824	Calnexin OS=Homo sapiens OX=9606 GN=CANX PE=1 SV=2	0	59.506	25	14	248	14	592	67.5	4.6	118.87	14	0	0.689	0.916	0.537772	0.948799	30.38	25.83	79.8	135.2	85	14.34	5.95	6.33	4.45093e+07	5.46389e+07	3.83764e+07	6.4706e+07	6.63826e+07	6.20597e+07	2.99994e+07	1.65338e+07	2.72506e+07	4.45093e+07	5.6486e+07	4.43938e+07	7.53737e+07	7.62646e+07	6.8302e+07	4.56684e+07	5.16067e+07	4.74125e+07	1
Q99715	Collagen alpha-1(XII) chain OS=Homo sapiens OX=9606 GN=COL12A1 PE=1 SV=2	0	59.46	6	16	137	16	3063	332.9	5.53	53.46	16	0	1.745	1.675	0.469549	0.0134383	44.91	43.62	66.7	76	157.4	29.37	26.09	47.77	6.53032e+07	5.80439e+07	8.70559e+07	4.60927e+07	8.00069e+07	67624824	7.54103e+07	9.05976e+07	8.85908e+07	6.53032e+07	6.00061e+07	1.00706e+08	5.36917e+07	9.19172e+07	7.44268e+07	1.14798e+08	2.82781e+08	1.54137e+08	1
Q9NTJ5	Phosphatidylinositol-3-phosphatase SAC1 OS=Homo sapiens OX=9606 GN=SACM1L PE=1 SV=2	0	59.441	28	15	233	15	587	66.9	7.12	98.8	15	0	0.797	0.868	0.797641	0.900451	19.21	18.35	85.4	115.2	99.4	12.02	7.53	10.23	1.91399e+07	2.04358e+07	2.09789e+07	2.1705e+07	2.53895e+07	25915094	14297522	8.56438e+06	1.41419e+07	1.91399e+07	2.11267e+07	2.42684e+07	2.52834e+07	2.91692e+07	2.85217e+07	2.17653e+07	2.67318e+07	2.4605e+07	1
Q13428	Treacle protein OS=Homo sapiens OX=9606 GN=TCOF1 PE=1 SV=3	0	59.336	14	15	137	15	1488	152	9.04	45.74	15	0	1.147	0.94	0.970936	0.978581	43.98	24.06	113.9	90.7	95.4	2.81	16.59	10.54	2.24227e+07	2.2942e+07	1.98931e+07	1.85857e+07	1.35058e+07	1.66603e+07	1.26686e+07	6.26859e+06	9.2489e+06	2.24227e+07	2.37176e+07	2.30124e+07	2.16498e+07	1.55163e+07	1.8336e+07	1.92856e+07	1.9566e+07	1.60919e+07	1
Q9UPT8	Zinc finger CCCH domain-containing protein 4 OS=Homo sapiens OX=9606 GN=ZC3H4 PE=1 SV=3	0	59.292	16	12	198	12	1303	140.2	6.27	99.97	12	0	1.434	0.77	0.827284	0.489879	33.44	50.5	101.1	59.9	139.1	18.45	16.55	28.82	2.16297e+07	1.93271e+07	2.4282e+07	1.38763e+07	1.03388e+07	1.16412e+07	1.95474e+07	1.36592e+07	1.41048e+07	2.16297e+07	1.99805e+07	2.80894e+07	1.61639e+07	1.18779e+07	1.28121e+07	2.97572e+07	4.26343e+07	2.45406e+07	1
Q9UHD2	Serine/threonine-protein kinase TBK1 OS=Homo sapiens OX=9606 GN=TBK1 PE=1 SV=1	0	59.265	26	14	270	14	729	83.6	6.79	123.7	14	0	1.04	0.667	0.985546	0.105981	23.2	31.19	85.7	89.2	125.1	12.78	15.55	28.33	2.23895e+07	2.75139e+07	2.41417e+07	1.89366e+07	25293984	2.68175e+07	2.67581e+07	1.7981e+07	18438251	2.23895e+07	2.8444e+07	2.79272e+07	2.20585e+07	2.90594e+07	2.95149e+07	4.07342e+07	5.61238e+07	3.20802e+07	1
Q07020	Large ribosomal subunit protein eL18 OS=Homo sapiens OX=9606 GN=RPL18 PE=1 SV=2	0	59.232	45	10	978	10	188	21.6	11.72	463.87	10	0	1.244	0.978	0.932471	0.994006	22.39	17.51	105.2	82.9	111.9	5.43	8.35	8.89	7.32797e+08	6.84849e+08	6.80229e+08	4.49716e+08	5.0294e+08	5.6279e+08	5.14751e+08	2.13739e+08	4.48015e+08	7.32797e+08	7.08002e+08	7.8689e+08	5.23857e+08	5.7781e+08	6.19398e+08	7.83612e+08	6.67139e+08	7.79488e+08	1
Q04721	Neurogenic locus notch homolog protein 2 OS=Homo sapiens OX=9606 GN=NOTCH2 PE=1 SV=3	0	59.145	10	15	166	13	2471	265.2	5.14	55.09	15	1	0.859	0.891	0.886786	0.929972	20.49	34.14	87.8	103.8	108.4	11.66	9.93	5.23	9.909e+06	1.01092e+07	1.0659e+07	9.14101e+06	1.12586e+07	1.12326e+07	9.15942e+06	4.13468e+06	7.26509e+06	9.909e+06	1.0451e+07	1.23304e+07	1.0648e+07	1.29346e+07	1.23624e+07	1.39435e+07	1.29055e+07	1.26403e+07	1
Q9UDY2	Tight junction protein ZO-2 OS=Homo sapiens OX=9606 GN=TJP2 PE=1 SV=2	0	58.992	17	16	150	16	1190	133.9	7.4	58.38	16	0	1.476	0.746	0.771461	0.470882	29.74	34.1	100	68.3	131.7	23.07	22.23	16.46	4.08427e+06	5.09469e+06	5.64095e+06	3.37739e+06	2.18507e+06	3.26796e+06	4.55871e+06	2.72454e+06	3.55067e+06	4.08427e+06	5.26692e+06	6.52546e+06	3.9342e+06	2.51035e+06	3.59666e+06	6.93979e+06	8.50407e+06	6.17771e+06	1
P04844	Dolichyl-diphosphooligosaccharide--protein glycosyltransferase subunit 2 OS=Homo sapiens OX=9606 GN=RPN2 PE=1 SV=3	0	58.879	29	12	299	12	631	69.2	5.69	125.87	12	0	0.735	0.984	0.661428	0.995663	22.64	19.95	88.9	123.6	87.4	9.9	10.53	10.16	4.58038e+07	5.11425e+07	3.79915e+07	4.6244e+07	5.54285e+07	5.99681e+07	2.95883e+07	1.627e+07	2.38899e+07	4.58038e+07	5.28715e+07	4.39487e+07	5.38679e+07	6.36799e+07	6.59999e+07	4.50426e+07	5.07832e+07	4.15654e+07	1
A6NNZ2	Tubulin beta 8B OS=Homo sapiens OX=9606 GN=TUBB8B PE=1 SV=1	0	58.867	19	9	845	1	444	49.5	4.86	416.25	9	0																															1
P08708	Small ribosomal subunit protein eS17 OS=Homo sapiens OX=9606 GN=RPS17 PE=1 SV=2	0	58.762	59	11	319	11	135	15.5	9.85	151.69	11	0	1.575	1.023	0.67647	0.980177	26.76	33.91	125.8	70.7	103.5	6.87	15.4	25.82	3.03387e+07	3.2222e+07	3.00474e+07	1.88679e+07	1.40615e+07	1.70092e+07	13152664	1.09062e+07	1.57489e+07	3.03387e+07	3.33113e+07	3.47588e+07	2.19785e+07	1.61548e+07	1.872e+07	2.00225e+07	3.40413e+07	2.7401e+07	1
Q14257	Reticulocalbin-2 OS=Homo sapiens OX=9606 GN=RCN2 PE=1 SV=1	0	58.71	43	10	263	10	317	36.9	4.4	109.42	10	0	1.162	0.708	0.965964	0.222472	26.2	39.69	95.3	76.5	128.3	8.4	13.06	37.71	1.03851e+08	1.01945e+08	1.04216e+08	6.37081e+07	73637529	8.76038e+07	9.32345e+07	8.19605e+07	7.87508e+07	1.03851e+08	1.05392e+08	1.20557e+08	7.42112e+07	8.45996e+07	9.64154e+07	1.41932e+08	2.55822e+08	1.37016e+08	1
Q13425	Beta-2-syntrophin OS=Homo sapiens OX=9606 GN=SNTB2 PE=1 SV=1	0	58.683	33	13	170	13	540	57.9	8.82	53.75	13	0	1.025	1.088	0.976582	0.891837	16.74	13.62	112.1	103	84.9	31.38	39.75	6.91	9.07755e+06	6.17078e+06	4.21822e+06	8.15565e+06	3.843e+06	5.32383e+06	3271582	1.54784e+06	2.50336e+06	9.07755e+06	6.37939e+06	4.87964e+06	9.50021e+06	4.41509e+06	5.85933e+06	4.98037e+06	4.83126e+06	4.35552e+06	1
Q2NL82	Pre-rRNA-processing protein TSR1 homolog OS=Homo sapiens OX=9606 GN=TSR1 PE=1 SV=1	0	58.632	21	14	269	14	804	91.8	7.42	126.56	14	0	1.235	0.942	0.936613	0.966179	19.68	19.93	105.4	94.6	100	5.23	9.17	14.88	38652142	4.05759e+07	3.29635e+07	3.03655e+07	3.02187e+07	2.70668e+07	2.21229e+07	1.17517e+07	2.57034e+07	38652142	4.19476e+07	3.81322e+07	3.53717e+07	3.47173e+07	2.97893e+07	3.3678e+07	3.66803e+07	4.47206e+07	1
O76031	ATP-dependent Clp protease ATP-binding subunit clpX-like, mitochondrial OS=Homo sapiens OX=9606 GN=CLPX PE=1 SV=2	0	58.627	25	14	224	14	633	69.2	7.58	77.73	14	0	1.065	0.969	0.996064	0.992969	29.85	26.96	113.7	90.9	95.4	18.38	19.45	8.64	1.87559e+07	2.22979e+07	1.38528e+07	12880683	1.28149e+07	1.86255e+07	9.78874e+06	5.64402e+06	9.04945e+06	1.87559e+07	2.30517e+07	1.6025e+07	1.50042e+07	1.47225e+07	2.04989e+07	1.49015e+07	1.76166e+07	1.57449e+07	1
Q9NUQ8	ATP-binding cassette sub-family F member 3 OS=Homo sapiens OX=9606 GN=ABCF3 PE=1 SV=2	0	58.602	24	13	206	13	709	79.7	6.34	79.98	13	0	1.055	0.725	0.994469	0.368511	15.63	24.1	90.3	82.4	127.2	13.62	26.64	14.74	1.08586e+07	1.12079e+07	1.21191e+07	9078152	5.92157e+06	1.06836e+07	1.07214e+07	6.6194e+06	9.19632e+06	1.08586e+07	1.15868e+07	1.40194e+07	1.05748e+07	6.80309e+06	1.17582e+07	1.63213e+07	2.0661e+07	1.60004e+07	1
Q92888	Rho guanine nucleotide exchange factor 1 OS=Homo sapiens OX=9606 GN=ARHGEF1 PE=1 SV=2	0	58.502	17	15	170	15	912	102.4	5.66	62.06	15	0	1.073	1.133	0.998872	0.819917	19.43	20.99	109	84.4	106.6	7.51	12.44	32.53	5.54333e+06	6.23192e+06	5.25754e+06	4.58189e+06	3.62053e+06	4.27937e+06	3.90696e+06	2.4384e+06	2.20991e+06	5.54333e+06	6.4426e+06	6.08193e+06	5.33727e+06	4.1595e+06	4.7098e+06	5.94761e+06	7.61094e+06	3.84496e+06	1
Q9ULH0	Kinase D-interacting substrate of 220 kDa OS=Homo sapiens OX=9606 GN=KIDINS220 PE=1 SV=3	0	58.498	11	16	144	16	1771	196.4	6.62	51.52	16	0	0.712	1.236	0.610242	0.581227	27	41.7	81.5	147.9	70.6	7.32	6.35	21.46	8.74396e+06	7.63383e+06	6.57549e+06	1.21691e+07	1.24611e+07	1.44181e+07	4.49277e+06	1.7104e+06	4.7493e+06	8.74396e+06	7.8919e+06	7.60653e+06	1.41753e+07	1.43161e+07	1.58684e+07	6.8394e+06	5.33865e+06	8.26316e+06	1
Q8TEX9	Importin-4 OS=Homo sapiens OX=9606 GN=IPO4 PE=1 SV=2	0	58.471	17	14	192	14	1081	118.6	4.96	79.98	14	0	1.146	1.043	0.970936	0.963043	19.22	24.1	108.1	96.1	95.8	9.99	5.6	12.14	3.59031e+07	4.15715e+07	3.70545e+07	2.98541e+07	3.36044e+07	3.46206e+07	2.49341e+07	9.81372e+06	2.20018e+07	3.59031e+07	4.29769e+07	4.28647e+07	3.4776e+07	3.86069e+07	3.81029e+07	3.79574e+07	3.06314e+07	3.82803e+07	1
Q12774	Rho guanine nucleotide exchange factor 5 OS=Homo sapiens OX=9606 GN=ARHGEF5 PE=1 SV=3	0	58.446	12	16	125	14	1597	176.7	5.53	36.73	16	1	1.089	0.808	0.99661	0.774853	28.18	26.55	82.5	89.9	127.6	19.77	7.33	10.56	6.96417e+06	6.09918e+06	7.88971e+06	6.51385e+06	6.00222e+06	7.25032e+06	7.07441e+06	3.57597e+06	5.2326e+06	6.96417e+06	6.30537e+06	9.12683e+06	7.58775e+06	6.89575e+06	7.97958e+06	1.07695e+07	1.11616e+07	9.10405e+06	1
P27635	Large ribosomal subunit protein uL16 OS=Homo sapiens OX=9606 GN=RPL10 PE=1 SV=5	0	58.428	44	13	571	8	214	24.6	10.08	334.85	13	4	1.406	1.146	0.847525	0.84808	24.25	19.48	115.8	78	106.2	6.13	8.29	7.71	2.96542e+08	2.66004e+08	2.27248e+08	1.82749e+08	1.61193e+08	1.67915e+08	1.81343e+08	7.59336e+07	1.44985e+08	2.96542e+08	2.74997e+08	2.62881e+08	2.12878e+08	1.85189e+08	1.84805e+08	2.76061e+08	2.3701e+08	2.52255e+08	1
Q2TAY7	WD40 repeat-containing protein SMU1 OS=Homo sapiens OX=9606 GN=SMU1 PE=1 SV=2	0	58.411	29	10	161	10	513	57.5	7.18	56.52	10	0	1.508	0.975	0.739933	0.994006	26.12	33.01	113.3	64	122.7	22.44	8.68	23.84	1.28465e+07	1.8243e+07	1.73608e+07	1.02263e+07	9.28307e+06	9.14007e+06	1.00708e+07	8.00246e+06	1.17438e+07	1.28465e+07	1.88598e+07	2.0083e+07	1.19122e+07	1.0665e+07	1.00594e+07	1.53309e+07	2.49779e+07	2.04328e+07	1
P08758	Annexin A5 OS=Homo sapiens OX=9606 GN=ANXA5 PE=1 SV=2	0	58.406	42	13	197	13	320	35.9	5.05	99.72	13	0	0.803	1	0.807	0.983159	35.31	31.53	81.5	127.8	90.7	20.23	8.17	17.93	7.22453e+06	9.34646e+06	9.43056e+06	1.17946e+07	1.40866e+07	1.37697e+07	5.29493e+06	3.68592e+06	6.18365e+06	7.22453e+06	9.66243e+06	1.09093e+07	1.3739e+07	1.61836e+07	1.51547e+07	8.06053e+06	1.15048e+07	1.07588e+07	1
Q12905	Interleukin enhancer-binding factor 2 OS=Homo sapiens OX=9606 GN=ILF2 PE=1 SV=2	0	58.4	43	13	335	13	390	43	5.26	150.24	13	0	1.325	0.916	0.905382	0.948143	26.28	28.74	102.7	75.1	122.2	17.12	4.76	8.47	3.77449e+07	4.57845e+07	4.61789e+07	3.17537e+07	3.01562e+07	3.06644e+07	3.70179e+07	1.93777e+07	2.93294e+07	3.77449e+07	4.73323e+07	5.34198e+07	3.69887e+07	3.46454e+07	3.37488e+07	5.63528e+07	6.04832e+07	5.10294e+07	1
P27348	14-3-3 protein theta OS=Homo sapiens OX=9606 GN=YWHAQ PE=1 SV=1	0	58.39	61	12	230	9	245	27.7	4.78	109.7	12	1	0.889	0.86	0.908111	0.860198	30.11	25.15	96.7	97.3	106	13.36	7.12	8.85	3.04158e+07	3.76082e+07	3.33563e+07	29585344	3.38007e+07	3.57247e+07	2.67288e+07	1.53931e+07	2.43225e+07	3.04158e+07	3.88796e+07	3.85866e+07	3.44629e+07	3.88324e+07	3.93181e+07	4.06895e+07	4.80463e+07	4.2318e+07	1
P62249	Small ribosomal subunit protein uS9 OS=Homo sapiens OX=9606 GN=RPS16 PE=1 SV=2	0	58.341	54	11	607	11	146	16.4	10.21	349.69	11	0	1.467	1.069	0.789447	0.948482	19.11	25.93	116.4	75.1	108.4	6.94	2.89	5.26	3.26925e+08	3.57697e+08	3.19426e+08	2.08502e+08	1.99692e+08	2.16644e+08	2.25979e+08	1.17695e+08	1.90445e+08	3.26925e+08	3.69789e+08	3.69512e+08	2.42876e+08	2.2942e+08	2.38435e+08	3.44011e+08	3.67361e+08	3.3135e+08	1
P14868	Aspartate--tRNA ligase, cytoplasmic OS=Homo sapiens OX=9606 GN=DARS1 PE=1 SV=2	0	58.261	34	15	286	15	501	57.1	6.55	133.67	15	0	1.169	0.748	0.965964	0.384805	16.64	19.36	98.2	70.9	130.9	6.09	10.65	12.19	3.63083e+07	3.17334e+07	3.17319e+07	2.66887e+07	22811648	2.34241e+07	31774139	1.8707e+07	2.69692e+07	3.63083e+07	3.28062e+07	3.67075e+07	3.10887e+07	2.62075e+07	2.57802e+07	4.83702e+07	5.83898e+07	4.69229e+07	1
P05387	Large ribosomal subunit protein P2 OS=Homo sapiens OX=9606 GN=RPLP2 PE=1 SV=1	0	58.255	53	9	404	9	115	11.7	4.54	174.01	9	0	1.204	1.061	0.9624	0.954745	29.27	41.59	109.4	91.7	98.9	3.91	10.4	7.09	2.88484e+08	2.71116e+08	2.61684e+08	1.73055e+08	210388940	2.21628e+08	1.65412e+08	9.23093e+07	1.49852e+08	2.88484e+08	2.80282e+08	3.02717e+08	2.01586e+08	2.41709e+08	2.4392e+08	2.51809e+08	2.88123e+08	2.60722e+08	1
Q8N684	Cleavage and polyadenylation specificity factor subunit 7 OS=Homo sapiens OX=9606 GN=CPSF7 PE=1 SV=1	0	58.163	33	12	300	12	471	52	8	138.98	12	0	1.42	0.928	0.84328	0.954745	22.67	37.94	112.1	83.2	104.7	15.17	8.57	16.72	4.1475e+07	4.09892e+07	4.66566e+07	2.70057e+07	2.89048e+07	2.54464e+07	2.59901e+07	1.64756e+07	2.20629e+07	4.1475e+07	4.23749e+07	5.39724e+07	3.14579e+07	3.32077e+07	2.80059e+07	3.9565e+07	5.14251e+07	3.83866e+07	1
Q14008	Cytoskeleton-associated protein 5 OS=Homo sapiens OX=9606 GN=CKAP5 PE=1 SV=3	0	58.093	9	16	142	16	2032	225.4	7.8	45.33	16	0	2.039	0.942	0.194234	0.983523	31.19	33.35	138.3	35.3	126.4	19.39	25.91	10.31	9.77153e+06	1.37976e+07	1.18009e+07	2.98983e+06	2.92748e+06	4.74795e+06	7.04708e+06	4.21278e+06	7.16715e+06	9.77153e+06	1.42641e+07	1.36513e+07	3.48274e+06	3.36328e+06	5.22551e+06	1.07279e+07	1.31493e+07	1.24699e+07	1
Q5SRE5	Nucleoporin NUP188 OS=Homo sapiens OX=9606 GN=NUP188 PE=1 SV=1	0	57.822	11	15	164	15	1749	195.9	6.73	60.21	15	0	1.182	0.817	0.965964	0.816867	17.45	42.25	103.6	79.7	116.7	24.28	10.32	6.75	3.8337e+06	5750932	5.33982e+06	3.9266e+06	3.89994e+06	4.89142e+06	4.39692e+06	2.2355e+06	3.50871e+06	3.8337e+06	5.94535e+06	6.17711e+06	4.57395e+06	4.48051e+06	5.38342e+06	6.69349e+06	6.97762e+06	6.10469e+06	1
P53999	Activated RNA polymerase II transcriptional coactivator p15 OS=Homo sapiens OX=9606 GN=SUB1 PE=1 SV=3	0	57.768	64	11	438	11	127	14.4	9.6	195.95	11	0	1.119	0.968	0.985529	0.991042	31.36	43.27	100.8	96.5	102.7	5.65	8.92	11.44	133496770	1.15914e+08	1.06618e+08	117076860	1.01443e+08	1.07317e+08	8.46193e+07	3.32481e+07	7.22829e+07	133496770	1.19833e+08	1.23336e+08	1.36379e+08	1.16544e+08	1.18112e+08	1.28817e+08	1.03777e+08	1.25763e+08	1
P63244	Small ribosomal subunit protein RACK1 OS=Homo sapiens OX=9606 GN=RACK1 PE=1 SV=3	0	57.726	46	12	358	12	317	35.1	7.69	174.02	12	0	1.599	1.239	0.651642	0.591519	29.37	30.45	124.2	72.6	103.2	19.62	22.11	25.25	6.61903e+07	9.54282e+07	75793815	3.5336e+07	4.46412e+07	58330430	3.57336e+07	2.92048e+07	4.18593e+07	6.61903e+07	9.86543e+07	8.76784e+07	4.11616e+07	5.12868e+07	6.41976e+07	5.43977e+07	9.11565e+07	7.28298e+07	1
Q6KC79	Nipped-B-like protein OS=Homo sapiens OX=9606 GN=NIPBL PE=1 SV=2	0	57.697	6	16	179	16	2804	315.9	7.91	61.95	16	0	1.495	1.055	0.747544	0.944903	20.45	16.84	125.9	63.6	110.5	9.08	25.5	10.39	1.02027e+07	9.48038e+06	1.00475e+07	2.80486e+06	4.48915e+06	4.93303e+06	5.88223e+06	2.64023e+06	5.81319e+06	1.02027e+07	9.80088e+06	1.1623e+07	3.26727e+06	5.15743e+06	5.42921e+06	8.95459e+06	8.24091e+06	1.01142e+07	1
O95819	Mitogen-activated protein kinase kinase kinase kinase 4 OS=Homo sapiens OX=9606 GN=MAP4K4 PE=1 SV=2	0	57.655	15	16	153	9	1239	142	7.46	61.08	16	0	1.165	1.215	0.965964	0.805605	19.14	16.8	112.9	94.2	92.9	15.97	13.93	8.99	145227	120359	91037.7	81927.8	90323.9	113233	72394.8	29479.3	58878.2	145227	124428	105312	95434.7	103770	124622	110207	92013.1	102440	1
P15924	Desmoplakin OS=Homo sapiens OX=9606 GN=DSP PE=1 SV=3	0	57.553	7	17	80	17	2871	331.6	6.81	23.29	17	0	1.017	0.806	0.971128	0.783666	21.45	25.81	107.5	68.6	123.9	27.81	25.94	26.1	4.29826e+06	5.8403e+06	6.59396e+06	3.30585e+06	4.71224e+06	3.01698e+06	4571162	3364562	3.88231e+06	4.29826e+06	6.03774e+06	7.6279e+06	3.85086e+06	5.41373e+06	3.32044e+06	6.95874e+06	1.05017e+07	6.75471e+06	1
P53675	Clathrin heavy chain 2 OS=Homo sapiens OX=9606 GN=CLTCL1 PE=1 SV=2	0	57.551	8	13	192	13	1640	186.9	5.85	94.05	13	0	0.839	1.259	0.862585	0.529422	21.86	41.36	100.8	122.1	77.1	1.96	19.33	36.73	3.55506e+07	3.52568e+07	3.03164e+07	26598642	3.93933e+07	3.91218e+07	1.78644e+07	5.84357e+06	2.23052e+07	3.55506e+07	3.64487e+07	3.507e+07	3.09838e+07	4.52576e+07	4.30568e+07	2.71952e+07	1.82394e+07	3.88081e+07	1
A3KMH1	von Willebrand factor A domain-containing protein 8 OS=Homo sapiens OX=9606 GN=VWA8 PE=1 SV=2	0	57.445	12	17	176	17	1905	214.7	7.4	54.63	17	0	1.09	1.016	0.99661	0.969162	15.94	24.37	110.9	100.8	88.3	8.37	8.16	12.3	8.91584e+06	9.58247e+06	7.27262e+06	6.95835e+06	7.7764e+06	6.91104e+06	4.36946e+06	2.27372e+06	4.82743e+06	8.91584e+06	9.90643e+06	8.41298e+06	8.10553e+06	8.93404e+06	7.60619e+06	6.65168e+06	7.09693e+06	8.3991e+06	1
P62263	Small ribosomal subunit protein uS11 OS=Homo sapiens OX=9606 GN=RPS14 PE=1 SV=3	0	57.436	41	8	451	8	151	16.3	10.05	199.53	8	0	1.51	1.038	0.737402	0.969162	19.71	19.11	112.6	73.2	114.2	3.8	5.54	4.53	2.86129e+08	2.98363e+08	2.60015e+08	1.84287e+08	1.70227e+08	1.77207e+08	2.13676e+08	9.77112e+07	1.71473e+08	2.86129e+08	3.0845e+08	3.00786e+08	2.14669e+08	1.95568e+08	1.95032e+08	3.25282e+08	3.04984e+08	2.98341e+08	1
P42224	Signal transducer and activator of transcription 1-alpha/beta OS=Homo sapiens OX=9606 GN=STAT1 PE=1 SV=2	0	57.323	23	14	280	14	750	87.3	6.05	146.44	14	0	0.72	1.062	0.637102	0.933246	29.33	29.74	100.3	109.5	90.2	14.14	11.95	14.54	1.9614e+07	2.5147e+07	2.09025e+07	22012578	2.76462e+07	2.39836e+07	1.11565e+07	7.18663e+06	1.2492e+07	1.9614e+07	2.59972e+07	2.41801e+07	2.56416e+07	3.17617e+07	2.63959e+07	1.69837e+07	2.24315e+07	2.17345e+07	1
P62081	Small ribosomal subunit protein eS7 OS=Homo sapiens OX=9606 GN=RPS7 PE=1 SV=1	0	57.322	55	10	663	10	194	22.1	10.1	334.92	10	0	1.969	1.338	0.251301	0.308199	22.21	26	131.1	66.3	102.7	4.3	4.99	4.76	2.94677e+08	3.02093e+08	2.48429e+08	1.27845e+08	1.31911e+08	1.25217e+08	1.40441e+08	7.4897e+07	1.3262e+08	2.94677e+08	3.12306e+08	2.87383e+08	1.48922e+08	1.51548e+08	1.37812e+08	2.13796e+08	2.33775e+08	2.30742e+08	1
P04792	Heat shock protein beta-1 OS=Homo sapiens OX=9606 GN=HSPB1 PE=1 SV=2	0	57.221	48	10	378	10	205	22.8	6.4	191.05	10	0	1.059	0.914	0.994877	0.944903	25.71	35.77	103.3	99.7	97	4.76	5.81	2.64	109002303	115237279	1.0178e+08	9.75672e+07	1.00526e+08	94073829	7.03505e+07	3.61636e+07	6.35095e+07	109002303	1.19133e+08	1.17739e+08	1.13652e+08	1.15491e+08	1.03536e+08	1.07095e+08	1.12877e+08	1.10498e+08	1
Q8IWR0	Zinc finger CCCH domain-containing protein 7A OS=Homo sapiens OX=9606 GN=ZC3H7A PE=1 SV=1	0	57.206	21	16	143	15	971	110.5	7.3	54.54	16	0	1.951	1.053	0.262623	0.947573	23.67	22.1	134.5	51.8	113.7	9.61	43.78	4.83	7.39578e+06	8.01603e+06	7.75535e+06	1.16174e+06	3.10154e+06	2.90005e+06	4.42774e+06	2.24572e+06	4.26351e+06	7.39578e+06	8.28703e+06	8.97139e+06	1.35327e+06	3.56325e+06	3.19175e+06	6.74041e+06	7.00951e+06	7.41796e+06	1
P43246	DNA mismatch repair protein Msh2 OS=Homo sapiens OX=9606 GN=MSH2 PE=1 SV=1	0	57.019	17	14	201	14	934	104.7	5.77	94.42	14	0	1.032	0.951	0.978238	0.983159	15.39	18.01	96.7	94.9	108.4	5.57	6.36	4.2	1.8187e+07	1.80824e+07	1.74813e+07	1.57494e+07	1.46872e+07	1.73955e+07	1.38164e+07	6.71154e+06	1.12081e+07	1.8187e+07	1.86937e+07	2.02224e+07	1.83459e+07	1.68736e+07	1.91452e+07	2.1033e+07	2.09486e+07	1.95007e+07	1
Q13616	Cullin-1 OS=Homo sapiens OX=9606 GN=CUL1 PE=1 SV=2	0	57.004	23	15	143	15	776	89.6	8	54.72	15	0	1.285	0.971	0.929522	0.999684	23.15	17.72	107.1	84.1	108.8	7.15	10.8	6.17	1.53123e+07	1.3649e+07	1.40763e+07	8.52399e+06	1.04702e+07	1.09705e+07	1.04853e+07	4.53872e+06	8.93645e+06	1.53123e+07	1.41104e+07	1.62835e+07	9.92928e+06	1.20289e+07	1.20739e+07	1.59619e+07	1.41666e+07	1.55483e+07	1
Q7Z417	FMR1-interacting protein NUFIP2 OS=Homo sapiens OX=9606 GN=NUFIP2 PE=1 SV=1	0	56.991	23	11	196	11	695	76.1	8.7	88.09	11	0	4.041	1.09	5.16627e-05	0.916534	47.6	23.76	146.5	24.4	129.2	7.71	26.72	2.38	2.40969e+07	2.40617e+07	2.4065e+07	3.18986e+06	3.60324e+06	5.48776e+06	1.46395e+07	6.81273e+06	1.26077e+07	2.40969e+07	2.48752e+07	2.78384e+07	3.71575e+06	4.13963e+06	6.03974e+06	2.22859e+07	2.12644e+07	2.19358e+07	1
O43896	Kinesin-like protein KIF1C OS=Homo sapiens OX=9606 GN=KIF1C PE=1 SV=3	0	56.982	17	16	220	12	1103	122.9	6.9	95.92	16	3	0.904	1.103	0.928696	0.881041	24.36	21.92	97.9	110.4	91.7	23.65	11.17	4.43	6.49267e+06	8.63965e+06	9.13147e+06	7.82131e+06	8.77323e+06	1.03396e+07	5.66144e+06	2.68196e+06	4.53793e+06	6.49267e+06	8.93172e+06	1.05633e+07	9.11076e+06	1.00793e+07	1.13796e+07	8.61848e+06	8.37117e+06	7.89541e+06	1
O95573	Fatty acid CoA ligase Acsl3 OS=Homo sapiens OX=9606 GN=ACSL3 PE=1 SV=3	0	56.815	19	13	265	12	720	80.4	8.38	123.49	13	1	0.875	0.855	0.901337	0.860198	21.86	16.78	94.1	105.6	100.4	9.11	6.57	10.64	1.58628e+07	1.821e+07	1.5953e+07	1.59507e+07	1.8277e+07	1.88186e+07	1.24556e+07	7.3896e+06	1.13207e+07	1.58628e+07	1.88257e+07	1.84545e+07	1.85804e+07	2.09979e+07	2.07115e+07	1.89614e+07	2.3065e+07	1.96965e+07	1
Q9Y287	Integral membrane protein 2B OS=Homo sapiens OX=9606 GN=ITM2B PE=1 SV=1	0	56.804	42	11	264	11	266	30.3	5.14	110.05	11	0	0.737	1.176	0.670456	0.768488	30.43	37.72	99.4	128.9	71.7	11.69	13.71	25.35	1.35187e+08	1.0339e+08	1.04744e+08	1.34948e+08	1.67726e+08	1.36329e+08	5.74488e+07	2.17832e+07	6.50922e+07	1.35187e+08	1.06886e+08	1.21168e+08	1.57196e+08	1.92694e+08	1.50042e+08	8.74551e+07	6.79916e+07	1.13252e+08	1
Q14151	Scaffold attachment factor B2 OS=Homo sapiens OX=9606 GN=SAFB2 PE=1 SV=1	0	56.715	16	14	144	6	953	107.4	6.16	57.46	14	4	0.792	0.904	0.786506	0.957242	19.48	25.42	94	118.6	87.4	21.1	4.24	26.05	5.80204e+06	4.62657e+06	6.29492e+06	6.56832e+06	6.11874e+06	6.65105e+06	3.52037e+06	2.63663e+06	3.09899e+06	5.80204e+06	4.78298e+06	7.28197e+06	7.6512e+06	7.0296e+06	7.32004e+06	5.3591e+06	8.22966e+06	5.39185e+06	1
O95817	BAG family molecular chaperone regulator 3 OS=Homo sapiens OX=9606 GN=BAG3 PE=1 SV=3	0	56.67	30	11	150	11	575	61.6	6.95	45.22	11	0	0.737	0.595	0.669067	0.0559182	22.15	36.8	72.9	100.7	126.4	61.85	26.93	33.33	1.00928e+06	4.11908e+06	4.29238e+06	5.04803e+06	5.57926e+06	3.36326e+06	3.47648e+06	3.3282e+06	4.24162e+06	1.00928e+06	4.25833e+06	4.96543e+06	5.88027e+06	6.40981e+06	3.70155e+06	5.2923e+06	1.03883e+07	7.37986e+06	1
Q15645	Pachytene checkpoint protein 2 homolog OS=Homo sapiens OX=9606 GN=TRIP13 PE=1 SV=2	0	56.657	33	10	306	10	432	48.5	6.09	139	10	0	1.112	0.833	0.990398	0.768488	21.4	26.37	97.2	87	115.7	9.09	8.12	8.16	4.00372e+07	4.20162e+07	4.14725e+07	30871022	3.38587e+07	3.84314e+07	3.37195e+07	1.89544e+07	29727994	4.00372e+07	4.34366e+07	4.79754e+07	3.59605e+07	3.88991e+07	4.2297e+07	5.13316e+07	5.91621e+07	5.17229e+07	1
P21980	Protein-glutamine gamma-glutamyltransferase 2 OS=Homo sapiens OX=9606 GN=TGM2 PE=1 SV=2	0	56.533	29	13	235	13	687	77.3	5.22	74.36	13	0	0.843	1.6	0.864936	0.0209178	22.37	34.48	110.1	128.8	61.1	14.64	10.02	9.79	1.5597e+07	1.81972e+07	1.81248e+07	1.62763e+07	1.91553e+07	2.09766e+07	6.28135e+06	3.72248e+06	6.00005e+06	1.5597e+07	1.88124e+07	2.09668e+07	1.89596e+07	2.20069e+07	2.30865e+07	9.56218e+06	1.16189e+07	1.04393e+07	1
O60524	Ribosome quality control complex subunit NEMF OS=Homo sapiens OX=9606 GN=NEMF PE=1 SV=4	0	56.445	18	14	149	14	1076	122.9	6.35	65.68	14	0	1.098	0.883	0.994877	0.929972	26.08	21.77	106.6	84.8	108.6	12.87	25.73	9.58	9.75289e+06	8.72676e+06	9.98451e+06	8.21425e+06	6.7541e+06	5.11875e+06	6.52821e+06	3.49235e+06	5.1706e+06	9.75289e+06	9.02179e+06	1.15501e+07	9.56848e+06	7.75955e+06	5.63362e+06	9.93797e+06	1.09006e+07	8.99617e+06	1
Q16822	Phosphoenolpyruvate carboxykinase [GTP], mitochondrial OS=Homo sapiens OX=9606 GN=PCK2 PE=1 SV=4	0	56.38	26	14	262	14	640	70.7	7.62	114.38	14	0	0.859	0.923	0.886786	0.954745	17.2	19.45	104.4	101.2	94.5	9.43	4.81	17.57	3.09239e+07	3.18455e+07	3.21046e+07	2.52497e+07	2.79314e+07	2.90037e+07	1.95734e+07	1.25037e+07	1.64381e+07	3.09239e+07	3.29221e+07	3.71387e+07	2.94125e+07	3.20895e+07	3.1921e+07	2.97969e+07	3.90275e+07	2.86002e+07	1
P62241	Small ribosomal subunit protein eS8 OS=Homo sapiens OX=9606 GN=RPS8 PE=1 SV=2	0	56.377	48	11	742	11	208	24.2	10.32	357	11	0	1.347	1.063	0.888573	0.954745	16.82	21.63	112.2	82.2	105.6	1.32	0.68	4.47	4.86675e+08	4.82918e+08	4.28637e+08	3.14302e+08	3.1595e+08	3.28194e+08	3.0649e+08	1.50107e+08	2.48488e+08	4.86675e+08	4.99244e+08	4.95847e+08	3.66118e+08	3.62984e+08	3.61206e+08	4.66574e+08	4.68527e+08	4.32337e+08	1
P40227	T-complex protein 1 subunit zeta OS=Homo sapiens OX=9606 GN=CCT6A PE=1 SV=3	0	56.192	28	12	211	9	531	58	6.68	90.76	12	2	1.119	1.182	0.985529	0.75042	21.75	27.93	113.3	98.5	88.2	5.02	6.59	19.42	3.76455e+07	3.84783e+07	3.5983e+07	2.9681e+07	3.09609e+07	2.845e+07	20323364	7.36842e+06	1.95648e+07	3.76455e+07	3.97791e+07	4.16252e+07	3.45743e+07	3.55699e+07	3.13116e+07	3.09385e+07	2.29989e+07	3.40402e+07	1
Q9Y4W6	AFG3-like protein 2 OS=Homo sapiens OX=9606 GN=AFG3L2 PE=1 SV=2	0	56.151	21	15	215	15	797	88.5	8.66	84.69	15	0	1.461	0.874	0.797213	0.913411	21.1	14.96	119.6	58.3	122.2	23.74	8.85	26.45	1.08132e+07	1.69155e+07	1.38474e+07	5.87072e+06	6.79333e+06	7.38768e+06	8.39902e+06	6.95147e+06	9.4078e+06	1.08132e+07	1.74873e+07	1.60187e+07	6.83858e+06	7.80462e+06	8.13076e+06	1.27859e+07	2.16975e+07	1.63683e+07	1
Q9NZN4	EH domain-containing protein 2 OS=Homo sapiens OX=9606 GN=EHD2 PE=1 SV=2	0	56.039	33	14	238	12	543	61.1	6.46	84.48	14	2	1.021	1.07	0.975938	0.931386	24.51	30.62	95.4	100.2	104.4	5.62	7.63	20.94	2.29429e+07	2.40115e+07	1.92744e+07	2.33634e+07	2.06793e+07	2.18819e+07	1.13514e+07	8.03883e+06	1.48966e+07	2.29429e+07	2.48232e+07	2.22967e+07	2.72151e+07	2.37577e+07	2.40829e+07	1.72804e+07	2.50915e+07	2.59182e+07	1
O75179	Ankyrin repeat domain-containing protein 17 OS=Homo sapiens OX=9606 GN=ANKRD17 PE=1 SV=3	0	55.965	6	14	235	6	2603	274.1	6.52	106.81	14	0	1.901	1.107	0.306065	0.860198	17.21	28.17	134.6	52.7	112.7	14.9	22.41	6.4	2.47359e+06	3.0655e+06	2.85265e+06	881312	1.07921e+06	1.45184e+06	1.74261e+06	938658	1.4982e+06	2.47359e+06	3.16914e+06	3.29995e+06	1.02661e+06	1.23987e+06	1.59787e+06	2.6528e+06	2.92982e+06	2.60667e+06	1
Q9H2U1	ATP-dependent DNA/RNA helicase DHX36 OS=Homo sapiens OX=9606 GN=DHX36 PE=1 SV=2	0	55.938	18	12	114	12	1008	114.7	7.68	40.43	12	0	1.313	1.023	0.907599	0.958055	27.23	21.48	126.8	95.7	77.5	15.53	19.26	9.9	8.23499e+06	7.80926e+06	5.31316e+06	5.70254e+06	5.30117e+06	4.0976e+06	2.85705e+06	1.57986e+06	3048842	8.23499e+06	8.07327e+06	6.14627e+06	6.64267e+06	6.09033e+06	4.50975e+06	4.34932e+06	4.93118e+06	5.30459e+06	1
P62750	Large ribosomal subunit protein uL23 OS=Homo sapiens OX=9606 GN=RPL23A PE=1 SV=1	0	55.899	45	9	505	9	156	17.7	10.45	216.15	9	0	1.493	1.017	0.749896	0.983159	19.47	24.79	110.7	79.6	109.7	4.22	3.98	3.84	3.41166e+08	3.17561e+08	3.08715e+08	2.20836e+08	2.06983e+08	2.22843e+08	2.36792e+08	1.08058e+08	1.94161e+08	3.41166e+08	3.28296e+08	3.57122e+08	2.57244e+08	2.37796e+08	2.45258e+08	3.60472e+08	3.37279e+08	3.37816e+08	1
Q96S55	ATPase WRNIP1 OS=Homo sapiens OX=9606 GN=WRNIP1 PE=1 SV=2	0	55.895	24	12	199	12	665	72.1	6.1	88.64	12	0	1.007	0.971	0.967525	0.992464	23.38	24.83	93.8	97.1	109.1	16.17	6.19	7.05	2.79563e+07	1.96508e+07	2.01031e+07	2.29515e+07	2.09646e+07	2.18413e+07	1.77744e+07	8.63235e+06	1.7494e+07	2.79563e+07	2.03151e+07	2.32553e+07	2.67353e+07	2.40854e+07	2.40382e+07	2.70582e+07	2.6944e+07	3.04372e+07	1
P05787	Keratin, type II cytoskeletal 8 OS=Homo sapiens OX=9606 GN=KRT8 PE=1 SV=7	0	55.754	24	15	329	9	483	53.7	5.59	155.63	15	0	1.144	0.889	0.970936	0.929972	22	28.96	96.5	87.2	116.2	28.77	6.3	58.45	9.6267e+06	1.59563e+07	9.74449e+06	8.74304e+06	8.10234e+06	9.56862e+06	7.6152e+06	1.01549e+07	7801469	9.6267e+06	1.64958e+07	1.12724e+07	1.01844e+07	9.3085e+06	1.05311e+07	1.15927e+07	3.16962e+07	1.35735e+07	1
Q9NSE4	Isoleucine--tRNA ligase, mitochondrial OS=Homo sapiens OX=9606 GN=IARS2 PE=1 SV=2	0	55.745	19	14	183	14	1012	113.7	7.2	63.73	14	0	1.157	0.853	0.966596	0.909671	28.16	27.17	109.9	80.3	109.8	13.01	7.51	8.11	6.06557e+06	7.45717e+06	6.59996e+06	4.54514e+06	5.33687e+06	5.06728e+06	4.47837e+06	2.44444e+06	4.60116e+06	6.06557e+06	7.70927e+06	7.63484e+06	5.29446e+06	6.13135e+06	5.57697e+06	6.81748e+06	7.62977e+06	8.00542e+06	1
Q9Y4B5	Microtubule cross-linking factor 1 OS=Homo sapiens OX=9606 GN=MTCL1 PE=1 SV=5	0	55.671	12	17	127	15	1905	209.4	6.43	35.05	17	0	1.38	1.179	0.858541	0.852693	23.53	22.83	109.7	90.3	100	21.87	20.63	23.96	1.04174e+06		1.23004e+06	605674	922737	911354	861324	355728	460061	1.04174e+06		1.42291e+06	705527	1.0601e+06	1.00302e+06	1.3112e+06	1.11033e+06	800446	1
P01889	HLA class I histocompatibility antigen, B alpha chain OS=Homo sapiens OX=9606 GN=HLA-B PE=1 SV=3	0	55.373	36	11	414	6	362	40.4	5.85	195.46	11	4	0.685	0.929	0.525483	0.954745	22.83	33.54	89.2	124.4	86.4	7.05	3.23	4.79	149161477	1.38958e+08	1.12265e+08	1.71878e+08	171084117	1.90119e+08	9.6018e+07	4.25543e+07	7.99479e+07	149161477	1.43655e+08	1.29869e+08	2.00215e+08	1.96553e+08	2.09242e+08	1.46169e+08	1.32824e+08	1.39099e+08	1
Q5VYK3	Proteasome adapter and scaffold protein ECM29 OS=Homo sapiens OX=9606 GN=ECPAS PE=1 SV=2	0	55.369	11	15	151	15	1845	204.2	7.12	60.09	15	0	0.883	0.802	0.906843	0.860198	24.42	30.69	101.3	137.6	61.2	48.26	13.45	88.63	1.93106e+06	5.52816e+06	3.61942e+06	6.05731e+06	4.85895e+06	5.16846e+06	185720	1.5228e+06	1.45396e+06	1.93106e+06	5.71504e+06	4.18695e+06	7.05594e+06	5.58227e+06	5.68833e+06	282724	4.75309e+06	2.5297e+06	1
O15371	Eukaryotic translation initiation factor 3 subunit D OS=Homo sapiens OX=9606 GN=EIF3D PE=1 SV=1	0	55.349	37	12	272	12	548	63.9	6.05	133.93	12	0	1.126	1.006	0.979492	0.992464	20.12	22.53	101.8	99.4	98.9	15.52	12.61	23.74	3.82957e+07	35959580	42215587	3.20973e+07	37221814	3.02191e+07	24298353	1.7547e+07	2.13812e+07	3.82957e+07	3.71753e+07	4.8835e+07	3.73889e+07	4.27628e+07	3.32586e+07	3.69897e+07	5.47692e+07	3.72006e+07	1
P36873	Serine/threonine-protein phosphatase PP1-gamma catalytic subunit OS=Homo sapiens OX=9606 GN=PPP1CC PE=1 SV=1	0	55.281	43	10	260	1	323	37	6.54	96.66	10	0	0.957	0.825	0.950114	0.903222	35.81	36.91	92.1	96.2	111.7	30.15	7.83	16.53	2.19668e+06	2.99258e+06	3.52619e+06	2.67827e+06	2.81273e+06	3.28546e+06	2.46417e+06	1.57436e+06	2.13505e+06	2.19668e+06	3.09375e+06	4.0791e+06	3.11981e+06	3.23145e+06	3.61592e+06	3.75123e+06	4.91403e+06	3.71471e+06	1
Q2M389	WASH complex subunit 4 OS=Homo sapiens OX=9606 GN=WASHC4 PE=1 SV=2	0	55.198	15	16	164	16	1173	136.3	7.44	52.06	16	0	0.958	0.843	0.950114	0.868331	22.57	23.07	92.7	93.7	113.6	22.41	5.09	8.41	5.95002e+06	7.75056e+06	8.14562e+06	6.9541e+06	6.84116e+06	7.88008e+06	6.68494e+06	3.14554e+06	4.967e+06	5.95002e+06	8.01258e+06	9.42287e+06	8.10057e+06	7.85958e+06	8.67269e+06	1.01766e+07	9.81812e+06	8.64193e+06	1
Q9BRZ2	E3 ubiquitin-protein ligase TRIM56 OS=Homo sapiens OX=9606 GN=TRIM56 PE=1 SV=3	0	55.187	29	14	175	14	755	81.4	7.74	60.42	14	0	1.282	1.155	0.930356	0.821632	20.42	27.45	93	62.5	144.5	12.83	15.73	6.53	2.78401e+07	2.72368e+07	3.00094e+07	16239532	1.6078e+07	2.2063e+07	3.11198e+07	1.40179e+07	2.39453e+07	2.78401e+07	2.81576e+07	3.47149e+07	1.89168e+07	1.84714e+07	2.42822e+07	4.7374e+07	4.37539e+07	4.16616e+07	1
Q86XX4	Extracellular matrix organizing protein FRAS1 OS=Homo sapiens OX=9606 GN=FRAS1 PE=1 SV=2	0	55.117	5	15	116	15	4008	442.9	5.57	37.6	15	0	0.941	0.894	0.936163	0.951502	31.43	20.55	89.4	111.8	98.8	2.03	10.81	3.06	7.76761e+06	7.22385e+06	6.64376e+06	7.01965e+06	8360233	9.19122e+06	5.75282e+06	2.63931e+06	4.88082e+06	7.76761e+06	7.46806e+06	7.68551e+06	8.17693e+06	9.60478e+06	1.01157e+07	8.75759e+06	8.23803e+06	8.492e+06	1
Q12789	General transcription factor 3C polypeptide 1 OS=Homo sapiens OX=9606 GN=GTF3C1 PE=1 SV=4	0	54.815	10	15	115	15	2109	238.7	7.3	29.37	15	0	0.385	0.908	0.0037865	0.954745	32.34	13.28	70.6	151.6	77.8	74.67	15.23	75.09	1.0822e+06	1.10675e+07	9.35663e+06	1.99614e+07	1.9929e+07	2.70204e+07	8.53657e+06	378566	6.85498e+06	1.0822e+06	1.14416e+07	1.08238e+07	2.32523e+07	2.28958e+07	2.97382e+07	1.29953e+07	1.18161e+06	1.19268e+07	1
Q96AG4	Leucine-rich repeat-containing protein 59 OS=Homo sapiens OX=9606 GN=LRRC59 PE=1 SV=1	0	54.813	49	12	236	12	307	34.9	9.57	107.54	12	0	2.131	1.021	0.142791	0.980351	26.88	29.86	126.8	55.2	118	15.09	8.74	10.36	5.61799e+07	73707910	5.77593e+07	2.79727e+07	2.39377e+07	2.64492e+07	4.3903e+07	1.99164e+07	3.12148e+07	5.61799e+07	7.61997e+07	6.6816e+07	3.25843e+07	2.75012e+07	2.91096e+07	6.68341e+07	6.21647e+07	5.43097e+07	1
Q9BYX7	Putative beta-actin-like protein 3 OS=Homo sapiens OX=9606 GN=POTEKP PE=5 SV=1	0	54.797	16	5	810	0	375	42	6.33	307.32	5	0																															0
P13010	X-ray repair cross-complementing protein 5 OS=Homo sapiens OX=9606 GN=XRCC5 PE=1 SV=3	0	54.767	21	14	240	14	732	82.7	5.81	104.82	14	0	0.668	1.014	0.474241	0.983159	23.98	37.09	93.1	118.1	88.9	13.73	18.55	15.71	2.08755e+07	2.44433e+07	2.37732e+07	3.56122e+07	2.55609e+07	2.91287e+07	1.90468e+07	7.73305e+06	1.22352e+07	2.08755e+07	2.52696e+07	2.75008e+07	4.14833e+07	2.9366e+07	3.20586e+07	2.89952e+07	2.4137e+07	2.12877e+07	1
Q9HD20	Endoplasmic reticulum transmembrane helix translocase OS=Homo sapiens OX=9606 GN=ATP13A1 PE=1 SV=2	0	54.716	14	13	148	13	1204	132.9	8.13	46.29	13	0	0.757	0.916	0.710352	0.992464	11.69	11.69	82.4	123.6	94	12.38	14.73	32.64	3.48894e+06	2.68032e+06	2.5249e+06	3.08417e+06	4.20917e+06	3.98323e+06	1.2217e+06	1.17777e+06	1.91568e+06	3.48894e+06	2.77093e+06	2.92081e+06	3.59263e+06	4.83576e+06	4.38388e+06	1.85982e+06	3.67614e+06	3.33303e+06	1
Q969V3	BOS complex subunit NCLN OS=Homo sapiens OX=9606 GN=NCLN PE=1 SV=2	0	54.665	23	10	218	10	563	62.9	6.89	76.94	10	0	0.918	1.032	0.930685	0.958055	22.71	26.09	91	118.4	90.6	9.51	9.06	6.23	1.15291e+07	1.26782e+07	1.20459e+07	1.52287e+07	14851481	1.35117e+07	8.79227e+06	3.80315e+06	7.50281e+06	1.15291e+07	1.31068e+07	1.39347e+07	1.77394e+07	1.70624e+07	1.48707e+07	1.33846e+07	1.18707e+07	1.30539e+07	1
P08581	Hepatocyte growth factor receptor OS=Homo sapiens OX=9606 GN=MET PE=1 SV=4	0	54.557	13	14	186	14	1390	155.4	7.33	76.33	14	0	0.982	1.047	0.965964	0.954745	18.98	23	103.4	106.2	90.5	20.91	10.12	12.27	1.16235e+07	1.05261e+07	6.62856e+06	9.59499e+06	9.65848e+06	1.20006e+07	7.60994e+06	2.99392e+06	5472813	1.16235e+07	1.08819e+07	7.66792e+06	1.11769e+07	1.10963e+07	1.32076e+07	1.15847e+07	9.34487e+06	9.52199e+06	1
Q9NZV1	Cysteine-rich motor neuron 1 protein OS=Homo sapiens OX=9606 GN=CRIM1 PE=1 SV=1	0	54.493	15	14	153	14	1036	113.7	5.21	77.06	14	0	1.24	0.584	0.933859	0.0151286	33.88	29.14	79.3	64.7	156	25.11	18.77	24.45	1.29609e+07	1.29586e+07	1.7176e+07	9.38588e+06	9.40897e+06	1.34778e+07	1.73173e+07	1.15124e+07	1.29376e+07	1.29609e+07	1.33967e+07	1.98692e+07	1.09333e+07	1.08096e+07	1.48335e+07	2.63623e+07	3.59335e+07	2.25097e+07	1
P54652	Heat shock-related 70 kDa protein 2 OS=Homo sapiens OX=9606 GN=HSPA2 PE=1 SV=1	0	54.428	16	11	491	6	639	70	5.74	213.81	11	0	0.995	0.932	0.965964	0.958055	21.91	16.1	99	94.8	106.3	7.76	7	4.05	2.7204e+08	3.05081e+08	2.4473e+08	2.32665e+08	2.35471e+08	2.77122e+08	1.99624e+08	1.0265e+08	1.70164e+08	2.7204e+08	3.15394e+08	2.83103e+08	2.71023e+08	2.70525e+08	3.04996e+08	3.0389e+08	3.20399e+08	2.96063e+08	1
P63104	14-3-3 protein zeta/delta OS=Homo sapiens OX=9606 GN=YWHAZ PE=1 SV=1	0	54.374	58	13	246	10	245	27.7	4.79	121.11	13	1	1.047	0.893	0.990398	0.912016	23.43	21.34	95.8	94.1	110	10.81	13.72	11.64	4.55358e+07	46901853	48428751	3.33e+07	4.14517e+07	46283371	3.28732e+07	2.02156e+07	3.1993e+07	4.55358e+07	4.84875e+07	5.60224e+07	3.879e+07	4.76224e+07	5.09388e+07	5.00433e+07	6.30986e+07	5.56637e+07	1
Q9UKV8	Protein argonaute-2 OS=Homo sapiens OX=9606 GN=AGO2 PE=1 SV=3	0	54.237	19	12	229	7	859	97.1	9.19	89.91	12	2	1.971	0.896	0.251299	0.922241	24.27	29.93	118.2	54.4	127.4	15.21	17.52	21.87	1.79944e+07	1.70878e+07	1.98572e+07	7.1089e+06	9.06816e+06	6.77625e+06	1.2735e+07	8.27832e+06	9.81486e+06	1.79944e+07	1.76655e+07	2.29709e+07	8.28089e+06	1.04181e+07	7.45784e+06	1.93866e+07	2.5839e+07	1.70766e+07	1
P22626	Heterogeneous nuclear ribonucleoproteins A2/B1 OS=Homo sapiens OX=9606 GN=HNRNPA2B1 PE=1 SV=2	0	54.192	41	13	399	12	353	37.4	8.95	209.66	13	0	1.096	0.983	0.995177	0.994881	23.92	24.97	106.9	95.4	97.7	9.36	5.36	10.47	1.0919e+08	1.20597e+08	1.13603e+08	8.8845e+07	9.68246e+07	1.04533e+08	7.47985e+07	4.31223e+07	6.43164e+07	1.0919e+08	1.24674e+08	1.31416e+08	1.03492e+08	1.11238e+08	1.15048e+08	1.13867e+08	1.34597e+08	1.11902e+08	1
P15880	Small ribosomal subunit protein uS5 OS=Homo sapiens OX=9606 GN=RPS2 PE=1 SV=2	0	54.15	40	11	594	11	293	31.3	10.24	308.38	11	0	1.529	0.994	0.714477	0.997207	20.22	20.5	119.4	75.9	104.7	4.85	13.66	10.3	4.02883e+08	4.27871e+08	357747073	2.25764e+08	2.38065e+08	1.9087e+08	2.1706e+08	1.16272e+08	2.33141e+08	4.02883e+08	4.42336e+08	4.13842e+08	2.62984e+08	2.73504e+08	2.10068e+08	3.30433e+08	3.62919e+08	4.05635e+08	1
Q9UKV3	Apoptotic chromatin condensation inducer in the nucleus OS=Homo sapiens OX=9606 GN=ACIN1 PE=1 SV=2	0	54.026	14	14	186	14	1341	151.8	6.43	64.34	14	0	0.909	1.365	0.930667	0.242673	17.05	25.43	121.8	111.6	66.6	15.1	13.22	17.3	1.00369e+07	1.2008e+07	1.17571e+07	1.1829e+07	9.90119e+06	9.80487e+06	5.60465e+06	2.17654e+06	3.52679e+06	1.00369e+07	1.2414e+07	1.36006e+07	1.37792e+07	1.13751e+07	1.07911e+07	8.53202e+06	6.7936e+06	6.13615e+06	1
Q15386	Ubiquitin-protein ligase E3C OS=Homo sapiens OX=9606 GN=UBE3C PE=1 SV=3	0	54.018	14	14	191	14	1083	123.8	6.71	81.43	14	0	0.83	0.928	0.854054	0.972518	21.72	30.52	87.7	107.8	104.5	9.49	18.55	9.36	8.14728e+06	8.00963e+06	8.33167e+06	6.95978e+06	1.02895e+07	9.24531e+06	5.73566e+06	3.37333e+06	5.66661e+06	8.14728e+06	8.28041e+06	9.63808e+06	8.10719e+06	1.18212e+07	1.01752e+07	8.73146e+06	1.05291e+07	9.85917e+06	1
O75083	WD repeat-containing protein 1 OS=Homo sapiens OX=9606 GN=WDR1 PE=1 SV=4	0	53.994	32	12	173	12	606	66.2	6.65	67.34	12	0	1.024	0.947	0.976582	0.991911	38.47	33.55	98.4	128.5	73	40.21	6.4	26.94	7.69028e+06	1.54679e+07	7.99051e+06	1.03652e+07	9.81335e+06	1.16463e+07	4.01204e+06	2.19809e+06	5.74523e+06	7.69028e+06	1.59909e+07	9.24343e+06	1.2074e+07	1.12742e+07	1.28177e+07	6.10759e+06	6.86087e+06	9.99596e+06	1
Q9ULX3	RNA-binding protein NOB1 OS=Homo sapiens OX=9606 GN=NOB1 PE=1 SV=1	0	53.562	25	11	285	11	412	46.6	7.18	142.77	11	0	1.949	0.625	0.263167	0.0432598	27.8	43.35	106.7	45.6	147.7	15.48	4.95	26.64	3.61514e+07	4.57945e+07	4.19016e+07	1.83467e+07	1.68574e+07	1.83651e+07	4.3024e+07	3.1164e+07	34930727	3.61514e+07	4.73426e+07	4.84718e+07	2.13713e+07	1.93669e+07	2.02124e+07	6.5496e+07	9.72716e+07	6.07749e+07	1
P06493	Cyclin-dependent kinase 1 OS=Homo sapiens OX=9606 GN=CDK1 PE=1 SV=3	0	53.347	48	10	315	9	297	34.1	8.4	139.92	10	1	1.063	0.945	0.995287	0.970447	22.36	20.06	102.5	97.8	99.7	6.69	12.38	6.06	6.31013e+07	6.74834e+07	53274434	4.42767e+07	5.7607e+07	5.47546e+07	4.03389e+07	21189005	3.37376e+07	6.31013e+07	6.97648e+07	6.16279e+07	5.15763e+07	6.61826e+07	6.02621e+07	6.14085e+07	6.61369e+07	5.86991e+07	1
Q86SQ0	Pleckstrin homology-like domain family B member 2 OS=Homo sapiens OX=9606 GN=PHLDB2 PE=1 SV=2	0	53.342	14	15	131	15	1253	142.1	7.43	40.81	15	0	2.523	0.745	0.0319237	0.573917	22.91	40.14	98.6	33.5	167.8	32.27	56.83	35.12	5.39379e+06	6.14151e+06	8.47012e+06	593229	1.87912e+06	2.50153e+06	7.09707e+06	5.63012e+06	5.34147e+06	5.39379e+06	6.34913e+06	9.79824e+06	691031	2.15885e+06	2.75315e+06	1.0804e+07	1.75732e+07	9.29347e+06	1
P33176	Kinesin-1 heavy chain OS=Homo sapiens OX=9606 GN=KIF5B PE=1 SV=1	0	53.274	21	15	114	15	963	109.6	6.51	40.35	15	0	1.28	1.186	0.930667	0.673102	19.04	16.7	129	61.6	109.3	13.31	47.51	12.77	5.99957e+06	7.54265e+06	5.76987e+06	5.80284e+06	2.7744e+06	2.86011e+06	3.71558e+06	1.98954e+06	2.75953e+06	5.99957e+06	7.79765e+06	6.6746e+06	6.75951e+06	3.18742e+06	3.14779e+06	5.65628e+06	6.20993e+06	4.80122e+06	1
P62140	Serine/threonine-protein phosphatase PP1-beta catalytic subunit OS=Homo sapiens OX=9606 GN=PPP1CB PE=1 SV=3	0	53.065	42	10	214	3	327	37.2	6.19	76.65	10	0	0.945	0.664	0.944469	0.455133	41.44	18.04	83.3	91.4	125.4	24.43	36.94	2.13	1.70326e+06	1468854	2.06199e+06	994082	1.62722e+06	2.29398e+06	1.68446e+06	805153	1.50717e+06	1.70326e+06	1.51851e+06	2.38531e+06	1.15797e+06	1.86946e+06	2.52472e+06	2.56427e+06	2.51311e+06	2.62228e+06	1
Q9H5V8	CUB domain-containing protein 1 OS=Homo sapiens OX=9606 GN=CDCP1 PE=1 SV=3	0	53.061	15	13	270	13	836	92.9	7.96	129.93	13	0	0.901	1.047	0.925757	0.954745	22.87	28.38	93.4	122	84.6	7.24	9.73	10.66	2.20998e+07	1.8601e+07	1.73124e+07	22469292	2.33444e+07	2.02663e+07	1.33194e+07	5.25032e+06	1.04335e+07	2.20998e+07	1.92299e+07	2.0027e+07	2.61736e+07	2.68195e+07	2.23048e+07	2.02763e+07	1.63877e+07	1.81529e+07	1
Q5T2N8	ATPase family AAA domain-containing protein 3C OS=Homo sapiens OX=9606 GN=ATAD3C PE=2 SV=2	0	52.872	25	10	301	0	411	46.4	9.31	146.03	10	0																															0
P08865	Small ribosomal subunit protein uS2 OS=Homo sapiens OX=9606 GN=RPSA PE=1 SV=4	0	52.851	43	9	355	9	295	32.8	4.87	177.06	9	0	1.499	1.113	0.743537	0.90071	29.39	27.56	120.6	83.2	96.2	18.38	7.86	12.74	1.07502e+08	1.51105e+08	1.18972e+08	8.2784e+07	7.24832e+07	8.6227e+07	72066423	4.28614e+07	6.12818e+07	1.07502e+08	1.56214e+08	1.37626e+08	9.6432e+07	8.32735e+07	9.49e+07	1.09708e+08	1.33783e+08	1.06622e+08	1
P98175	RNA-binding protein 10 OS=Homo sapiens OX=9606 GN=RBM10 PE=1 SV=3	0	52.839	17	13	196	10	930	103.5	5.97	82.71	13	1	1.34	0.885	0.893099	0.920599	23.4	27.25	101.9	75.4	122.7	8.17	7.22	18.81	1.50233e+07	1.39363e+07	1.45506e+07	9.53664e+06	9.13627e+06	1.09971e+07	1.11154e+07	7.6288e+06	1.0397e+07	1.50233e+07	1.44074e+07	1.68321e+07	1.11089e+07	1.04963e+07	1.21032e+07	1.69211e+07	2.38116e+07	1.80895e+07	1
Q8WUQ7	Splicing factor Cactin OS=Homo sapiens OX=9606 GN=CACTIN PE=1 SV=3	0	52.801	23	13	95	13	758	88.6	9.14	32.55	13	0	1.706	6.205	0.514828	1.6177e-16	28.15	38.3	173.5	110.7	15.9	18.48	8.65	78.78	1.26447e+07	1.33304e+07	1.54146e+07	7.88964e+06	6.74875e+06	7.98969e+06	828197	422447	46435.4	1.26447e+07	1.37811e+07	1.78317e+07	9.19035e+06	7.7534e+06	8.79333e+06	1.26077e+06	1.31858e+06	80791.6	1
P12236	ADP/ATP translocase 3 OS=Homo sapiens OX=9606 GN=SLC25A6 PE=1 SV=4	0	52.758	42	12	500	3	298	32.8	9.74	272.33	12	1	1.541	1.363	0.70782	0.258391	33.56	46.07	117.6	76	106.4	5.19	4.26	4.55	3.29431e+07	3.51703e+07	2.91903e+07	1.83218e+07	2.0162e+07	1.98344e+07	18933568	9.78993e+06	1.81304e+07	3.29431e+07	3.63593e+07	3.37674e+07	2.13424e+07	2.31634e+07	2.18295e+07	2.88228e+07	3.05571e+07	3.15446e+07	1
Q15417	Calponin-3 OS=Homo sapiens OX=9606 GN=CNN3 PE=1 SV=1	0	52.743	36	11	237	10	329	36.4	6.05	111.64	11	0	1.271	0.545	0.930685	0.00317252	40.43	45.37	69.7	68.2	162.1	23.13	24.53	43.63	2.30801e+07	2.57612e+07	3.09985e+07	1.56712e+07	2.63521e+07	2.3667e+07	31069827	3.45302e+07	3.55879e+07	2.30801e+07	2.66321e+07	3.5859e+07	1.82549e+07	3.0275e+07	2.60475e+07	4.7298e+07	1.07778e+08	6.19183e+07	1
P46776	Large ribosomal subunit protein uL15 OS=Homo sapiens OX=9606 GN=RPL27A PE=1 SV=2	0	52.667	33	8	783	8	148	16.6	11	389.65	8	0	1.263	1.128	0.930685	0.871057	32.88	28.13	114.9	85.5	99.7	3.98	2.3	5.98	6.54194e+08	6.82586e+08	6.01415e+08	4.35944e+08	4.50615e+08	4.83039e+08	4.31568e+08	1.87875e+08	3.46887e+08	6.54194e+08	7.05662e+08	6.95717e+08	5.07815e+08	5.17696e+08	5.31625e+08	6.56981e+08	5.8641e+08	6.03538e+08	1
Q9H4M9	EH domain-containing protein 1 OS=Homo sapiens OX=9606 GN=EHD1 PE=1 SV=2	0	52.664	33	13	127	11	534	60.6	6.83	47.16	13	2	0.851	1.182	0.877877	0.700187	17.56	23.94	92.9	124.9	82.2	0.6	9.8	10.53	1.75713e+07	1.71464e+07	1.51488e+07	1.75084e+07	2.0561e+07	2.24542e+07	8.47975e+06	5.00687e+06	8.93767e+06	1.75713e+07	1.77261e+07	1.75241e+07	2.03949e+07	2.36218e+07	2.47128e+07	1.29088e+07	1.56279e+07	1.55504e+07	1
Q96GA3	Protein LTV1 homolog OS=Homo sapiens OX=9606 GN=LTV1 PE=1 SV=1	0	52.394	26	12	166	12	475	54.8	4.91	67.51	12	0	1.286	0.78	0.928696	0.543948	38.59	29.75	78.7	112.9	108.4	32.25	30.72	23.85	2.36469e+08	194385766	3.15455e+08	1.73934e+08	2.9508e+08	3.49925e+08	2.13848e+08	7.64915e+07	2.24131e+08	2.36469e+08	2.00957e+08	3.64919e+08	2.0261e+08	3.39007e+08	3.85122e+08	3.25543e+08	2.38752e+08	3.89959e+08	1
Q96HS1	Serine/threonine-protein phosphatase PGAM5, mitochondrial OS=Homo sapiens OX=9606 GN=PGAM5 PE=1 SV=2	0	52.335	37	10	279	10	289	32	8.68	123.35	10	0	1.782	1.026	0.433083	0.978934	41.2	21.49	116.5	68.6	114.9	0.97	6.99	4.02	6.78334e+07	66838219	5.94847e+07	3.47679e+07	3.11973e+07	3.69124e+07	4.46024e+07	2.05353e+07	3.984e+07	6.78334e+07	6.90978e+07	6.8812e+07	4.04999e+07	3.58414e+07	4.06252e+07	6.78988e+07	6.40964e+07	6.93165e+07	1
Q8IWX8	Calcium homeostasis endoplasmic reticulum protein OS=Homo sapiens OX=9606 GN=CHERP PE=1 SV=3	0	52.312	16	11	162	11	916	103.6	9.04	52	11	0	1.207	1.389	0.959552	0.186417	14.1	35.46	121.8	100.8	77.4	14.51	18.31	20.68	1.20546e+07	1.05069e+07	1.24577e+07	8.56937e+06	6.68239e+06	1.01104e+07	4.80865e+06	3.37139e+06	4.40542e+06	1.20546e+07	1.08621e+07	1.44111e+07	9.98214e+06	7.67716e+06	1.11273e+07	7.32026e+06	1.05231e+07	7.66486e+06	1
P13637	Sodium/potassium-transporting ATPase subunit alpha-3 OS=Homo sapiens OX=9606 GN=ATP1A3 PE=1 SV=3	0	52.29	16	12	370	1	1013	111.7	5.38	174.55	12	0																															1
P18621	Large ribosomal subunit protein uL22 OS=Homo sapiens OX=9606 GN=RPL17 PE=1 SV=3	0	52.285	39	10	351	10	184	21.4	10.17	217.05	10	0	1.329	1.028	0.901337	0.976281	25.34	24.37	108.6	80.1	111.3	4.34	8.59	6.94	2.82812e+08	2.60083e+08	2.24303e+08	1.83441e+08	1.72498e+08	1.63404e+08	1.8306e+08	7.85603e+07	1.58387e+08	2.82812e+08	2.68875e+08	2.59474e+08	2.13684e+08	1.98177e+08	1.7984e+08	2.78674e+08	2.45209e+08	2.75573e+08	1
Q00653	Nuclear factor NF-kappa-B p100 subunit OS=Homo sapiens OX=9606 GN=NFKB2 PE=1 SV=4	0	52.229	20	13	140	13	900	96.7	6.25	44.57	13	0	0.967	0.759	0.962711	0.55653	35.57	32.79	88.7	77.5	133.9	10.44	20.89	4.73	6.5499e+06	7.47937e+06	6.92505e+06	7.46674e+06	5.04177e+06	6.13972e+06	7.61312e+06	4.04003e+06	6.71022e+06	6.5499e+06	7.73222e+06	8.01091e+06	8.69773e+06	5.79232e+06	6.75728e+06	1.15896e+07	1.26101e+07	1.16749e+07	1
O95425	Supervillin OS=Homo sapiens OX=9606 GN=SVIL PE=1 SV=2	0	52.189	10	13	78	13	2214	247.6	6.98	27.7	13	0	1.417	0.858	0.822245	0.954745	37.69	30.02	110.5	68.7	120.9	65.96	4.4	21.1	1.42513e+06	4.88767e+06	1.90715e+06		1.23081e+06	1.20731e+06	1.5851e+06	1.02821e+06	1.24182e+06	1.42513e+06	5.05291e+06	2.20619e+06		1.41403e+06	1.32875e+06	2.41302e+06	3.20932e+06	2.16061e+06	1
O43172	U4/U6 small nuclear ribonucleoprotein Prp4 OS=Homo sapiens OX=9606 GN=PRPF4 PE=1 SV=2	0	52.113	34	13	191	13	522	58.4	7.42	68.48	13	0	0.973	0.874	0.965964	0.922241	24.87	26.82	88.1	97.3	114.5	24.69	21.62	10.97	7.26919e+06	7.80536e+06	9.87208e+06	8.3776e+06	7.75509e+06	5.72876e+06	6.88876e+06	3.76086e+06	5.41841e+06	7.26919e+06	8.06923e+06	1.142e+07	9.75875e+06	8.90955e+06	6.30498e+06	1.04868e+07	1.17387e+07	9.42733e+06	1
Q6PGP7	Superkiller complex protein 3 OS=Homo sapiens OX=9606 GN=SKIC3 PE=1 SV=1	0	52.098	11	14	118	14	1564	175.4	7.53	36.37	14	0	0.931	0.932	0.932471	0.979065	16.32	16.76	101.5	106.4	92	12.96	16.56	22.37	7.84971e+06	8.15236e+06	5.62726e+06	8.14436e+06	5.90532e+06	7.47596e+06	5.68945e+06	1.75894e+06	4.08991e+06	7.84971e+06	8.42796e+06	6.50963e+06	9.48707e+06	6.78442e+06	8.22793e+06	8.66112e+06	5.49014e+06	7.11591e+06	1
P06576	ATP synthase subunit beta, mitochondrial OS=Homo sapiens OX=9606 GN=ATP5F1B PE=1 SV=3	0	52.097	33	11	235	11	529	56.5	5.4	101.12	11	0	1.15	0.874	0.968906	0.88899	11.68	20.46	100.5	86.1	113.4	6.98	2.81	13.82	4.66902e+07	5.19495e+07	4.3505e+07	35644410	3.75065e+07	3.98795e+07	3.38856e+07	2.16194e+07	3.26445e+07	4.66902e+07	5.37057e+07	5.03266e+07	4.15209e+07	4.30899e+07	4.38907e+07	5.15845e+07	6.74804e+07	5.67973e+07	1
Q96II8	DISP complex protein LRCH3 OS=Homo sapiens OX=9606 GN=LRCH3 PE=1 SV=2	0	52.046	29	15	115	14	777	86	6.71	44.58	15	1	1.561	0.837	0.687522	0.862232	11.61	25.05	101.3	73.7	125.1	7.55	8.51	11.13	6845496	7.66102e+06	6.19413e+06	4.67262e+06	4.53862e+06	4.18456e+06	5.59148e+06	3.34601e+06	5.08673e+06	6845496	7.92002e+06	7.16538e+06	5.44297e+06	5.21426e+06	4.60546e+06	8.51198e+06	1.04438e+07	8.85026e+06	1
P11388	DNA topoisomerase 2-alpha OS=Homo sapiens OX=9606 GN=TOP2A PE=1 SV=3	0	52.022	10	13	199	13	1531	174.3	8.72	78.41	13	0	1.429	0.815	0.832075	0.787099	51.46	34.66	107.7	57.3	135	5.07	24.88	5.7	1.06652e+07	1.09974e+07	1.01978e+07	5.18732e+06	7.89197e+06	5.46996e+06	9.12875e+06	4.95831e+06	8.19011e+06	1.06652e+07	1.13692e+07	1.17968e+07	6.04251e+06	9.06681e+06	6.02015e+06	1.38968e+07	1.54763e+07	1.42497e+07	1
P35222	Catenin beta-1 OS=Homo sapiens OX=9606 GN=CTNNB1 PE=1 SV=1	0	51.982	20	11	192	10	781	85.4	5.86	80.09	11	0	1.049	0.859	0.992122	0.914062	31.4	31.79	89	89.2	121.8	52.67	11.97	18.82	1.07437e+07	4.35923e+06	4.14745e+06	4.50436e+06	3.59012e+06	4.36618e+06	4.35589e+06	1.49244e+06	3.77201e+06	1.07437e+07	4.5066e+06	4.79778e+06	5.24696e+06	4.12457e+06	4.80535e+06	6.63102e+06	4.65833e+06	6.56281e+06	1
Q12802	A-kinase anchor protein 13 OS=Homo sapiens OX=9606 GN=AKAP13 PE=1 SV=2	0	51.776	6	14	136	14	2813	307.4	5.24	52.49	14	0	0.801	0.999	0.802465	0.976281	28.34	29.71	90.2	115.2	94.6	6.53	11.26	9.91	6.76724e+06	6.11764e+06	6.23144e+06	7.41494e+06	6.27574e+06	8.14008e+06	5.19232e+06	2.27168e+06	3.73052e+06	6.76724e+06	6.32445e+06	7.20854e+06	8.63739e+06	7.20998e+06	8.95885e+06	7.90433e+06	7.09055e+06	6.49063e+06	1
P04049	RAF proto-oncogene serine/threonine-protein kinase OS=Homo sapiens OX=9606 GN=RAF1 PE=1 SV=1	0	51.766	26	12	205	9	648	73	9.2	91.11	12	3	1.024	0.847	0.976582	0.860198	16.96	25.59	89.4	100	110.6	10.18	9.48	17.66	1.06851e+07	1.18876e+07	8.75352e+06	1.13367e+07	9.51301e+06	1.0861e+07	6.52167e+06	4.51179e+06	7.5944e+06	1.06851e+07	1.22895e+07	1.01261e+07	1.32057e+07	1.09292e+07	1.19535e+07	9.92803e+06	1.40826e+07	1.32133e+07	1
Q86UP2	Kinectin OS=Homo sapiens OX=9606 GN=KTN1 PE=1 SV=1	0	51.562	13	14	112	14	1357	156.2	5.64	33.61	14	0	1.486	0.924	0.757747	0.969162	22.29	23.26	113.1	60.1	126.8	3.15	13.93	6.87	9177939	8699350	8.26812e+06	4.81908e+06	3.69651e+06	4.43119e+06	6.75832e+06	2.93516e+06	5.97424e+06	9177939	8.99345e+06	9.56457e+06	5.61357e+06	4.24679e+06	4.8769e+06	1.02883e+07	9.16147e+06	1.03944e+07	1
O60271	C-Jun-amino-terminal kinase-interacting protein 4 OS=Homo sapiens OX=9606 GN=SPAG9 PE=1 SV=4	0	51.514	13	14	61	14	1321	146.1	5.15	20.44	14	0	1.247	0.714	0.930685	0.561932	16.23	37.62	43.8	37.7	218.5	42.91	47.47	48.28		811294	1.35668e+06		1.21878e+06	632796	2.83423e+06	3.4149e+06	3.29023e+06		838722	1.56941e+06		1.40021e+06	696446	4.31459e+06	1.06589e+07	5.72458e+06	1
Q9BZF1	Oxysterol-binding protein-related protein 8 OS=Homo sapiens OX=9606 GN=OSBPL8 PE=1 SV=3	0	51.433	15	12	168	10	889	101.1	6.96	67.78	12	1	1.117	1.092	0.987465	0.903222	21.4	17.24	101	96.7	102.2	2.25	22.69	4.16	1.1375e+07	1.09444e+07	1.0192e+07	9.35356e+06	7.44414e+06	1.23015e+07	7.07369e+06	3.7289e+06	6.61795e+06	1.1375e+07	1.13144e+07	1.17902e+07	1.08956e+07	8.55232e+06	1.35388e+07	1.07684e+07	1.1639e+07	1.15144e+07	1
P56192	Methionine--tRNA ligase, cytoplasmic OS=Homo sapiens OX=9606 GN=MARS1 PE=1 SV=2	0	51.43	18	11	129	11	900	101.1	6.16	49.05	11	0	1.088	0.721	0.997143	0.337983	16.86	16.06	90.1	98.1	111.8	7.3	20.55	10.66	9.77878e+06	1.05002e+07	9.75651e+06	7477123	1.15139e+07	1.07433e+07	8.85428e+06	4.88077e+06	7.09191e+06	9.77878e+06	1.08552e+07	1.12863e+07	8.70982e+06	1.32279e+07	1.18239e+07	1.3479e+07	1.52343e+07	1.2339e+07	1
Q06787	Fragile X messenger ribonucleoprotein 1 OS=Homo sapiens OX=9606 GN=FMR1 PE=1 SV=1	0	51.428	24	12	198	11	632	71.1	7.42	85.37	12	0	1.831	1.219	0.379913	0.610896	29.44	23.81	129.5	62.9	107.6	13.03	3.5	7.3	1.24234e+07	1.22243e+07	1.34711e+07	5.56848e+06	5.29335e+06	5.58252e+06	6.20019e+06	3.36575e+06	6.25644e+06	1.24234e+07	1.26376e+07	1.55833e+07	6.48652e+06	6.08134e+06	6.14403e+06	9.43862e+06	1.05055e+07	1.08854e+07	1
P07237	Protein disulfide-isomerase OS=Homo sapiens OX=9606 GN=P4HB PE=1 SV=3	0	51.423	29	13	231	13	508	57.1	4.87	105.52	13	0	0.627	0.874	0.352551	0.906355	21.45	28.25	83.6	128.5	87.9	14.76	9.32	13.57	1.37136e+07	1.67405e+07	1.58536e+07	2.15627e+07	2.31509e+07	27319799	1.19479e+07	7.19567e+06	1.01404e+07	1.37136e+07	1.73064e+07	1.83395e+07	2.51175e+07	2.65973e+07	3.00677e+07	1.81885e+07	2.24597e+07	1.7643e+07	1
O75330	Hyaluronan mediated motility receptor OS=Homo sapiens OX=9606 GN=HMMR PE=1 SV=2	0	51.406	22	15	109	15	724	84	5.83	42.08	15	0	1.731	0.787	0.487944	0.619944	24.47	27.34	115.5	38.7	145.8	25.93	23.44	37.91	9.31965e+06	1.41115e+07	1.36171e+07	4056484	6.14701e+06	4.44669e+06	1.20966e+07	1.0271e+07	9.50841e+06	9.31965e+06	1.45885e+07	1.57523e+07	4.72525e+06	7.06209e+06	4.89396e+06	1.84148e+07	3.20586e+07	1.65434e+07	1
Q16513	Serine/threonine-protein kinase N2 OS=Homo sapiens OX=9606 GN=PKN2 PE=1 SV=1	0	51.292	18	14	145	14	984	112	6.3	52.24	14	0	1.181	0.954	0.965964	0.995855	35.6	23.18	122.7	65.9	111.4	35.42	8.9	30.81	4.91227e+06	9.69555e+06	5.95824e+06	3.17974e+06	2.85055e+06	3.55083e+06	5042141	2.00607e+06	2.30965e+06	4.91227e+06	1.00233e+07	6.8925e+06	3.70397e+06	3.2749e+06	3.90798e+06	7.67572e+06	6.26151e+06	4.01849e+06	1
P62280	Small ribosomal subunit protein uS17 OS=Homo sapiens OX=9606 GN=RPS11 PE=1 SV=3	0	51.214	33	9	357	9	158	18.4	10.3	175.97	9	0	1.383	1.102	0.862585	0.908189	19.78	15.97	135.2	71.8	93	20.94	33.5	26.55	2.76087e+08	283645351	1.67369e+08	1.26e+08	1.23761e+08	2.25622e+08	116663966	6.0866e+07	162620156	2.76087e+08	2.93234e+08	1.93613e+08	1.46772e+08	1.42184e+08	2.48316e+08	1.77599e+08	1.8998e+08	2.82938e+08	1
Q13610	Periodic tryptophan protein 1 homolog OS=Homo sapiens OX=9606 GN=PWP1 PE=1 SV=1	0	51.09	33	10	204	10	501	55.8	4.77	83.92	10	0	0.847	1.013	0.873861	0.976281	19.51	23.67	91.8	118.5	89.7	13.12	8.66	24.95	2.15963e+07	18572153	2.15463e+07	2.16231e+07	2.42717e+07	2.72283e+07	8.98794e+06	6.75908e+06	1.29845e+07	2.15963e+07	1.92e+07	2.49248e+07	2.5188e+07	2.7885e+07	2.9967e+07	1.36825e+07	2.1097e+07	2.25913e+07	1
Q9ULV4	Coronin-1C OS=Homo sapiens OX=9606 GN=CORO1C PE=1 SV=1	0	51.084	22	11	93	11	474	53.2	7.08	39.53	11	0	1.413	1.157	0.845067	0.768488	48.14	53.16	110.7	86.1	103.2	68.29	20.36	34.63	6.7532e+06	2.00286e+07	6.29383e+06	4.17903e+06	4.93238e+06	6.57697e+06	3.28398e+06	3.18992e+06	3.90234e+06	6.7532e+06	2.07057e+07	7.28071e+06	4.868e+06	5.66664e+06	7.23851e+06	4.99924e+06	9.95663e+06	6.78957e+06	1
Q9UK22	F-box only protein 2 OS=Homo sapiens OX=9606 GN=FBXO2 PE=1 SV=2	0	50.964	53	9	171	9	296	33.3	4.37	74.41	9	0	0.95	0.874	0.942678	0.905467	25	29.46	110	105.1	84.9	11.15	9.25	23.36	2.33566e+07	2.79444e+07	2.14661e+07	1.73372e+07	20660399	2.17077e+07	1.6182e+07	4952138	1.1024e+07	2.33566e+07	2.88891e+07	2.4832e+07	2.01955e+07	2.3736e+07	2.38912e+07	2.46341e+07	1.5457e+07	1.91804e+07	1
Q9BTV4	Transmembrane protein 43 OS=Homo sapiens OX=9606 GN=TMEM43 PE=1 SV=1	0	50.912	37	9	203	9	400	44.8	8.13	69.94	9	0	0.598	1.052	0.265402	0.957242	20.65	25.37	76.1	145.6	78.3	11.56	9.21	6.9	2.50153e+07	2.79151e+07	1.99107e+07	3.52684e+07	4.16642e+07	4.43927e+07	1.55394e+07	8.24384e+06	1.56069e+07	2.50153e+07	2.88588e+07	2.30327e+07	4.10828e+07	4.78666e+07	4.88579e+07	2.36558e+07	2.57313e+07	2.7154e+07	1
O00541	Pescadillo homolog OS=Homo sapiens OX=9606 GN=PES1 PE=1 SV=1	0	50.855	23	13	259	13	588	68	7.33	114.15	13	0	1.312	1.1	0.907599	0.905467	17.48	27.49	114.3	87.2	98.4	2.94	5.56	9.23	1.8467e+07	1.89426e+07	1.65193e+07	1.18094e+07	1.33851e+07	1.32526e+07	1.03428e+07	5.27308e+06	1.07737e+07	1.8467e+07	1.95829e+07	1.91095e+07	1.37564e+07	1.53777e+07	1.45856e+07	1.57449e+07	1.64588e+07	1.87448e+07	1
Q6PD62	RNA polymerase-associated protein CTR9 homolog OS=Homo sapiens OX=9606 GN=CTR9 PE=1 SV=1	0	50.789	15	14	148	14	1173	133.4	6.77	51.64	14	0	1.108	1.047	0.992122	0.954745	25.65	30.25	107.5	93.9	98.6	8.33	12.96	6.1	9.65413e+06	10904710	8.6192e+06	7.47483e+06	7.75604e+06	6.3394e+06	6.19856e+06	2.93135e+06	4.81403e+06	9.65413e+06	1.12734e+07	9.9707e+06	8.70715e+06	8.91064e+06	6.97705e+06	9.43615e+06	9.14958e+06	8.37579e+06	1
Q13049	E3 ubiquitin-protein ligase TRIM32 OS=Homo sapiens OX=9606 GN=TRIM32 PE=1 SV=2	0	50.783	32	14	107	14	653	71.9	6.98	35.18	14	0	0.882	1.19	0.906843	0.677463	15.08	12.99	101.4	116.9	81.8	18.12	18.98	4.41	5.22422e+06	5.20013e+06	6.18326e+06	5.32049e+06	6.83474e+06	4.94423e+06	2.64251e+06	1.39595e+06	2.49175e+06	5.22422e+06	5.37593e+06	7.15281e+06	6.19764e+06	7.8522e+06	5.44155e+06	4.02272e+06	4.35715e+06	4.33532e+06	1
O00560	Syntenin-1 OS=Homo sapiens OX=9606 GN=SDCBP PE=1 SV=1	0	50.773	48	9	283	9	298	32.4	7.53	100.85	9	0	0.835	1.109	0.860913	0.903222	41.53	49.44	103.2	113.1	83.7	10.67	8.01	25.08	1.17524e+08	1.08155e+08	8.23776e+07	116024637	1.06661e+08	1.04939e+08	5.96179e+07	1.92564e+07	5.76376e+07	1.17524e+08	1.11811e+08	9.52945e+07	1.35153e+08	1.22539e+08	1.15495e+08	9.0757e+07	6.01047e+07	1.00282e+08	1
Q15424	Scaffold attachment factor B1 OS=Homo sapiens OX=9606 GN=SAFB PE=1 SV=4	0	50.695	14	11	140	3	915	102.6	5.47	55.91	11	0	0.837	0.782	0.862585	0.801828	27.16	24.99	72.9	120.7	106.4	41.64	28.52	16.35	2.80333e+06	2.00668e+06	4.00916e+06	4.66748e+06	2.61014e+06	4.21498e+06	2.6859e+06	1.31234e+06	1.7434e+06	2.80333e+06	2.07451e+06	4.6378e+06	5.43698e+06	2.99869e+06	4.63894e+06	4.08879e+06	4.09619e+06	3.03329e+06	1
P18669	Phosphoglycerate mutase 1 OS=Homo sapiens OX=9606 GN=PGAM1 PE=1 SV=2	0	50.627	57	10	188	10	254	28.8	7.18	71.91	10	0	0.683	1.017	0.518227	0.980351	25.83	30.07	87.4	125.3	87.2	20.39	8.33	3.1	2.35639e+07	2.95299e+07	1.78424e+07	3.15645e+07	2.94035e+07	2.82792e+07	1.61103e+07	7.39984e+06	1.35152e+07	2.35639e+07	3.05282e+07	2.06402e+07	3.67683e+07	3.37807e+07	3.11236e+07	2.45249e+07	2.3097e+07	2.35148e+07	1
Q9BZH6	WD repeat-containing protein 11 OS=Homo sapiens OX=9606 GN=WDR11 PE=1 SV=1	0	50.625	15	13	138	13	1224	136.6	6.92	50.15	13	0	1.041	1.252	0.986628	0.649228	29.59	15.75	82.1	172.5	45.4	50.93	24.22	44.47	2.35929e+06	1.41296e+06	3.55059e+06	2.88673e+06	4.8003e+06	4.50364e+06	542658	418138	1.18275e+06	2.35929e+06	1.46073e+06	4.10733e+06	3.36265e+06	5.5149e+06	4.95663e+06	826095	1.30513e+06	2.05784e+06	1
Q14527	Helicase-like transcription factor OS=Homo sapiens OX=9606 GN=HLTF PE=1 SV=2	0	50.597	16	13	173	13	1009	113.9	8.6	73.52	13	0	1.164	1.107	0.965964	0.868331	10.21	9.9	110.6	93.2	96.2	5.52	8.49	0.83	7.49787e+06	8.1008e+06	6.86719e+06	5.7416e+06	5.15981e+06	6.36891e+06	4.5519e+06	2.18554e+06	3.96974e+06	7.49787e+06	8.37466e+06	7.94397e+06	6.68817e+06	5.92792e+06	7.00952e+06	6.92942e+06	6.82167e+06	6.90683e+06	1
P46531	Neurogenic locus notch homolog protein 1 OS=Homo sapiens OX=9606 GN=NOTCH1 PE=1 SV=4	0	50.567	6	11	129	11	2555	272.3	5.12	38.92	11	0	1.167	1.111	0.965964	0.868331	13.89	40.31	129	64.8	106.1	37.93	56.09	34.86	2.55061e+06	2198445	976985	980263	2.06374e+06	758559	2.11896e+06	599020	1.03795e+06	2.55061e+06	2.27277e+06	1.13018e+06	1.14187e+06	2.37096e+06	834858	3.22573e+06	1.86971e+06	1.80591e+06	1
Q8NB90	ATPase family gene 2 protein homolog A OS=Homo sapiens OX=9606 GN=AFG2A PE=1 SV=3	0	50.421	18	13	218	13	893	97.8	5.66	98.67	13	0	1.023	1.011	0.976582	0.966179	17.78	27.73	92.5	105.8	101.7	27.15	36.79	32.17	5.20509e+06	6.66411e+06	3.44991e+06	2.49109e+06	5.43388e+06	5.41108e+06	3.76022e+06	1.00724e+06	3.49587e+06	5.20509e+06	6.8894e+06	3.99086e+06	2.90178e+06	6.2428e+06	5.95534e+06	5.72423e+06	3.14389e+06	6.08235e+06	1
P27816	Microtubule-associated protein 4 OS=Homo sapiens OX=9606 GN=MAP4 PE=1 SV=3	0	50.37	13	12	100	12	1152	120.9	5.43	36.74	12	0	100	0.809	1.5566e-16	0.860216		33.89	101.8		198.2	29.83		62.58	2.20417e+06	3.96981e+06	3.13029e+06				6.42388e+06	2.26008e+06	1.16356e+06	2.20417e+06	4.10402e+06	3.62113e+06				9.77915e+06	7.05436e+06	2.02445e+06	1
Q9NQ29	Putative RNA-binding protein Luc7-like 1 OS=Homo sapiens OX=9606 GN=LUC7L PE=1 SV=1	0	50.358	27	10	208	4	371	43.7	9.92	91.41	10	0	1.374	0.872	0.871913	0.914773	25.23	49.47	103.3	72.8	124	13.97	11.65	34.97	7969080	8.92235e+06	9.1219e+06	5.58028e+06	5.77098e+06	4.84189e+06	5.92896e+06	5.57878e+06	6.36479e+06	7969080	9.22398e+06	1.05522e+07	6.50026e+06	6.63008e+06	5.32891e+06	9.02574e+06	1.7413e+07	1.10739e+07	1
Q10471	Polypeptide N-acetylgalactosaminyltransferase 2 OS=Homo sapiens OX=9606 GN=GALNT2 PE=1 SV=1	0	50.309	27	12	156	12	571	64.7	8.35	55.67	12	0	0.677	1.119	0.499293	0.852693	41.27	45.76	82.5	153.8	63.7	36.56	10.74	9.08	3.25017e+06	6.7119e+06	5.75276e+06	1.07947e+07	8.97148e+06	1.12721e+07	3.37237e+06	1.51693e+06	3.25976e+06	3.25017e+06	6.93881e+06	6.65479e+06	1.25743e+07	1.0307e+07	1.24059e+07	5.13381e+06	4.73476e+06	5.67157e+06	1
P07195	L-lactate dehydrogenase B chain OS=Homo sapiens OX=9606 GN=LDHB PE=1 SV=2	0	50.3	34	11	216	10	334	36.6	6.05	109.05	11	0	1.266	0.967	0.930685	0.994006	32.82	27.46	101.5	91.1	107.4	10.91	12.41	10.5	2.07378e+07	24497429	1.85934e+07	1.33528e+07	1.70482e+07	1.75425e+07	1.2691e+07	7.29048e+06	13618230	2.07378e+07	2.53256e+07	2.15088e+07	1.55542e+07	1.95861e+07	1.9307e+07	1.93196e+07	2.27557e+07	2.3694e+07	1
P04075	Fructose-bisphosphate aldolase A OS=Homo sapiens OX=9606 GN=ALDOA PE=1 SV=2	0	50.259	39	10	147	9	364	39.4	8.09	54.25	10	1	1.991	1.108	0.233901	0.860198	78.94	63.52	108.4	108.7	82.9	103.05	21.24	70.08	2.86153e+06	2.54031e+07	6.17812e+06	6619760	6.23772e+06	4.58121e+06	3.13389e+06	4971558	3.13927e+06	2.86153e+06	2.62619e+07	7.14686e+06	7.71111e+06	7.1663e+06	5.04201e+06	4.77076e+06	1.55176e+07	5.46192e+06	1
Q99661	Kinesin-like protein KIF2C OS=Homo sapiens OX=9606 GN=KIF2C PE=1 SV=2	0	50.245	22	13	122	12	725	81.3	7.83	45.98	13	0	2.624	1.103	0.0206527	0.881109	15.4	22.97	141	22.6	136.4	16.75	15.8	15.71	6.4316e+06	7.99186e+06	7780932	1.02982e+06	1.414e+06	1.20316e+06	5.25176e+06	2.70373e+06	3.56335e+06	6.4316e+06	8.26204e+06	9.00099e+06	1.1996e+06	1.62449e+06	1.32418e+06	7.99482e+06	8.43911e+06	6.19977e+06	1
Q3KQU3	MAP7 domain-containing protein 1 OS=Homo sapiens OX=9606 GN=MAP7D1 PE=1 SV=1	0	50.238	18	11	159	11	841	92.8	10.11	67.37	11	0	0.797	0.854	0.797331	0.896705	19.53	24.26	90.3	114.2	95.5	4.15	5.45	22.02	1.22952e+07	1.28369e+07	1.07584e+07	1.3513e+07	1.31315e+07	1.52654e+07	1.05292e+07	3280418	7.56905e+06	1.22952e+07	1.32708e+07	1.24453e+07	1.57407e+07	1.50864e+07	1.68009e+07	1.60288e+07	1.02391e+07	1.31692e+07	1
P55265	Double-stranded RNA-specific adenosine deaminase OS=Homo sapiens OX=9606 GN=ADAR PE=1 SV=4	0	50.236	12	13	135	13	1226	136	8.65	44.21	13	0	1.014	1.089	0.970936	0.905467	24.38	26.9	83.5	120.7	95.9	25.86	9.58	21.7	7.71428e+06	7.4686e+06	1.01836e+07	9.58541e+06	8.80372e+06	1.11361e+07	5.82572e+06	4.0394e+06	5.04133e+06	7.71428e+06	7.72109e+06	1.17805e+07	1.11657e+07	1.01143e+07	1.22562e+07	8.86856e+06	1.26081e+07	8.77126e+06	1
Q9NZJ4	Sacsin OS=Homo sapiens OX=9606 GN=SACS PE=1 SV=2	0	50.169	4	16	79	16	4579	520.8	7.05	22.5	16	0	0.851	0.981	0.877877	0.983822	25.15	11.65	89.8	120.8	89.4	18.46	21.52	19.47	6.15792e+06	4.89301e+06	6.34665e+06	4.83564e+06	7.43483e+06	7.53002e+06	4026188	1.62049e+06	4296292	6.15792e+06	5.05843e+06	7.34181e+06	5.63286e+06	8.54161e+06	8.28742e+06	6.12912e+06	5.05802e+06	7.47499e+06	1
Q02241	Kinesin-like protein KIF23 OS=Homo sapiens OX=9606 GN=KIF23 PE=1 SV=3	0	50.154	16	13	176	13	960	110	8.51	65.98	13	0	1.846	0.985	0.363885	0.992464	17.66	29.33	136.2	53.8	110.1	5.65	16.45	22.43	1.33344e+07	1.43319e+07	1.17727e+07	4.39668e+06	5.9924e+06	4.88448e+06	6.82737e+06	4.94727e+06	6.32672e+06	1.33344e+07	1.48164e+07	1.36186e+07	5.12153e+06	6.88446e+06	5.37578e+06	1.03934e+07	1.54418e+07	1.10077e+07	1
Q08945	FACT complex subunit SSRP1 OS=Homo sapiens OX=9606 GN=SSRP1 PE=1 SV=1	0	50.099	19	12	250	12	709	81	6.87	110.41	12	0	1.361	1.06	0.881989	0.954745	14.13	16.57	114.4	84.1	101.5	9.58	6.57	12.09	4.39887e+07	4.59526e+07	4.59387e+07	2.99832e+07	2.75784e+07	3.27072e+07	2.76965e+07	1.61656e+07	2.32367e+07	4.39887e+07	4.75061e+07	5.3142e+07	3.49263e+07	3.16839e+07	3.5997e+07	4.21628e+07	5.04574e+07	4.04289e+07	1
O00203	AP-3 complex subunit beta-1 OS=Homo sapiens OX=9606 GN=AP3B1 PE=1 SV=3	0	50.043	12	12	236	12	1094	121.2	6.04	111.77	12	0	1.026	0.969	0.976893	0.994006	21	20.03	106.5	90.7	102.8	7.15	14.86	6.4	2.1154e+07	2.33473e+07	2.06283e+07	17445755	1.49389e+07	2.10531e+07	1.44785e+07	8.00409e+06	1.32444e+07	2.1154e+07	2.41366e+07	2.38628e+07	2.03219e+07	1.71628e+07	2.31707e+07	2.20408e+07	2.4983e+07	2.30436e+07	1
Q8IZL8	Proline-, glutamic acid- and leucine-rich protein 1 OS=Homo sapiens OX=9606 GN=PELP1 PE=1 SV=2	0	49.756	14	10	140	10	1130	119.6	4.34	72.22	10	0	0.798	0.718	0.798606	0.251391	22.37	30.27	85.6	101.2	113.2	16.9	7.9	13.25	2.15302e+07	2.32289e+07	25763670	2.29849e+07	2.47055e+07	2.84077e+07	2.08456e+07	1.2065e+07	1.67652e+07	2.15302e+07	2.40142e+07	2.98034e+07	2.67742e+07	2.83833e+07	3.12651e+07	3.17336e+07	3.76584e+07	2.91692e+07	1
P46783	Small ribosomal subunit protein eS10 OS=Homo sapiens OX=9606 GN=RPS10 PE=1 SV=1	0	49.736	56	10	505	10	165	18.9	10.15	218.14	10	0	1.326	1.482	0.904541	0.0961439	33.23	38.17	121.8	88.3	89.9	10.68	4.78	4.33	1.70179e+08	2.03775e+08	1.63025e+08	1.10925e+08	1.23753e+08	1.24199e+08	9.14624e+07	4.51121e+07	7.46369e+07	1.70179e+08	2.10664e+08	1.88587e+08	1.29212e+08	1.42175e+08	1.36691e+08	1.39234e+08	1.40808e+08	1.29859e+08	1
Q9Y265	RuvB-like 1 OS=Homo sapiens OX=9606 GN=RUVBL1 PE=1 SV=1	0	49.732	33	11	323	11	456	50.2	6.42	158.03	11	0	1.266	1.308	0.930685	0.385158	20.99	26.75	121.7	92.3	85.9	14.92	3.59	6.11	5.26393e+07	5.82965e+07	6.12404e+07	4.13107e+07	3.91173e+07	4.15241e+07	2.76105e+07	1.50268e+07	2.44498e+07	5.26393e+07	6.02674e+07	7.0843e+07	4.81213e+07	4.49405e+07	4.57008e+07	4.20319e+07	4.69029e+07	4.25396e+07	1
Q53EP0	Fibronectin type III domain-containing protein 3B OS=Homo sapiens OX=9606 GN=FNDC3B PE=1 SV=2	0	49.684	15	13	170	13	1204	132.8	5.95	58.98	13	0	1.286	0.625	0.928696	0.0794412	26.33	34.55	103.4	72.8	123.8	16.11	10.78	29.59	9.5567e+06	1.21789e+07	1.12576e+07	7.6148e+06	6.86091e+06	8.89434e+06	9.90233e+06	7.74178e+06	8.50485e+06	9.5567e+06	1.25907e+07	1.30228e+07	8.8702e+06	7.88227e+06	9.78897e+06	1.50744e+07	2.41643e+07	1.47973e+07	1
Q9P270	SLAIN motif-containing protein 2 OS=Homo sapiens OX=9606 GN=SLAIN2 PE=1 SV=2	0	49.664	25	11	220	11	581	62.5	9.45	103.35	11	0	2.344	0.505	0.0668487	0.000529153	36.91	38.17	88.3	37.9	173.8	24.53	4.3	32.86	2.19863e+07	2.36921e+07	2.98229e+07	8.48161e+06	9.15207e+06	9.75888e+06	3.1664e+07	24803872	2.48187e+07	2.19863e+07	2.44931e+07	3.44991e+07	9.87991e+06	1.05145e+07	1.07405e+07	4.82025e+07	7.74199e+07	4.31813e+07	1
Q9UKM7	Endoplasmic reticulum mannosyl-oligosaccharide 1,2-alpha-mannosidase OS=Homo sapiens OX=9606 GN=MAN1B1 PE=1 SV=2	0	49.638	18	10	129	10	699	79.5	7.72	35.67	10	0	0.856	0.958	0.884665	0.995444	29.26	24.84	102.8	114.2	83	10.41	14.44	19.58	8.08115e+06	9.63643e+06	7.92861e+06	1.08037e+07	8.87163e+06	8.76931e+06	3.77987e+06	2.37413e+06	4.93026e+06	8.08115e+06	9.9622e+06	9.17183e+06	1.25848e+07	1.01923e+07	9.65136e+06	5.75414e+06	7.41032e+06	8.57802e+06	1
P19784	Casein kinase II subunit alpha' OS=Homo sapiens OX=9606 GN=CSNK2A2 PE=1 SV=1	0	49.632	33	10	237	10	350	41.2	8.56	93.92	10	0	1.054	1.07	0.994334	0.93982	18.24	26.95	111.4	102	86.6	4.66	9.86	13.09	2.46148e+07	2.61284e+07	2.25135e+07	2.04581e+07	2.44392e+07	2.15509e+07	1.32931e+07	7.91416e+06	1.12117e+07	2.46148e+07	2.70117e+07	2.60437e+07	2.38308e+07	2.80774e+07	2.37186e+07	2.02363e+07	2.47023e+07	1.95069e+07	1
P49736	DNA replication licensing factor MCM2 OS=Homo sapiens OX=9606 GN=MCM2 PE=1 SV=4	0	49.604	13	11	116	11	904	101.8	5.52	41.4	11	0	0.983	0.592	0.965964	0.0436793	26.71	35.42	87.6	91	121.4	2.86	12.61	29.49	5.09389e+06	5.03981e+06	4.25431e+06	5.36569e+06	4.2717e+06	4.8081e+06	4635790	3.64559e+06	4.03979e+06	5.09389e+06	5.21019e+06	4.92139e+06	6.2503e+06	4.90761e+06	5.29172e+06	7.05712e+06	1.13789e+07	7.02871e+06	1
P13489	Ribonuclease inhibitor OS=Homo sapiens OX=9606 GN=RNH1 PE=1 SV=2	0	49.516	39	11	149	11	461	49.9	4.82	53.72	11	0	1.067	0.902	0.99661	0.954745	24.71	27.58	100.4	71.5	128.1	38.97	21.32	25.23	8.44037e+06	1.73141e+07	9.64347e+06	5.53927e+06	6.91646e+06	8991334	6.65362e+06	5.46429e+06	8.17829e+06	8.44037e+06	1.78994e+07	1.11556e+07	6.45249e+06	7.94608e+06	9.89572e+06	1.01289e+07	1.70556e+07	1.42292e+07	1
P11274	Breakpoint cluster region protein OS=Homo sapiens OX=9606 GN=BCR PE=1 SV=2	0	49.486	11	14	169	14	1271	142.7	7.03	58.76	14	0	0.939	0.635	0.934426	0.0961439	20.21	33	78	66.3	155.8	17.12	13.11	22.8	7.21615e+06	5.28036e+06	6.6114e+06	6.13211e+06	5.33775e+06	5.01205e+06	9.47257e+06	6.53916e+06	7.86734e+06	7.21615e+06	5.45887e+06	7.64808e+06	7.14306e+06	6.13236e+06	5.51618e+06	1.44202e+07	2.04106e+07	1.36882e+07	1
Q04695	Keratin, type I cytoskeletal 17 OS=Homo sapiens OX=9606 GN=KRT17 PE=1 SV=2	0	49.484	25	13	191	4	432	48.1	5.02	79.31	13	0	2.105	1.143	0.147779	0.860198	30.51	37.55	121.8	57.9	120.3	37.15		38.87	1.5273e+06	2.98316e+06	1.6624e+06		795326		941004	806817		1.5273e+06	3.08401e+06	1.92306e+06		913722		1.4325e+06	2.5183e+06		1
Q9BSJ8	Extended synaptotagmin-1 OS=Homo sapiens OX=9606 GN=ESYT1 PE=1 SV=1	0	49.474	15	13	168	13	1104	122.8	5.83	49.53	13	0	0.803	0.828	0.807	0.865039	24.12	33.42	108.4	105.2	86.4	26.24	21.8	12	5.34779e+06	8.20477e+06	7.8459e+06	6.56673e+06	7.16522e+06	1.0293e+07	4.43756e+06	1.75532e+06	3.93154e+06	5.34779e+06	8.48215e+06	9.07614e+06	7.64934e+06	8.23187e+06	1.13284e+07	6.75535e+06	5.47886e+06	6.84037e+06	1
Q14839	Chromodomain-helicase-DNA-binding protein 4 OS=Homo sapiens OX=9606 GN=CHD4 PE=1 SV=2	0	49.367	9	13	130	9	1912	217.9	5.86	49.93	13	0	1.783	0.937	0.432745	0.974248	17.52	18.94	117.6	63.4	119	8.79	3.22	10.8	1.05908e+07	1.13099e+07	1.09216e+07	5.45671e+06	5.49158e+06	5.44088e+06	7.77456e+06	4.48566e+06	6.62929e+06	1.05908e+07	1.16922e+07	1.26341e+07	6.35632e+06	6.30909e+06	5.98814e+06	1.18353e+07	1.4001e+07	1.15341e+07	1
Q9BQ39	ATP-dependent RNA helicase DDX50 OS=Homo sapiens OX=9606 GN=DDX50 PE=1 SV=1	0	49.292	19	11	183	9	737	82.5	9.17	81.91	11	0	1.11	1.069	0.990879	0.922241	20.81	18.5	96.9	103.3	99.8	11.73	7.72	18.75	1.07775e+07	8.52184e+06	7.68421e+06	8.13023e+06	9.27702e+06	8.40674e+06	6.32936e+06	2.13713e+06	5.26206e+06	1.07775e+07	8.80994e+06	8.8891e+06	9.4706e+06	1.06581e+07	9.25233e+06	9.63527e+06	6.67059e+06	9.1553e+06	1
P62805	Histone H4 OS=Homo sapiens OX=9606 GN=H4C1 PE=1 SV=2	0	49.254	52	9	519	9	103	11.4	11.36	266.7	9	0	1.707	0.936	0.514181	0.959746	16.41	21.3	114.8	68.1	117	12.78	0.43	9.45	2.04042e+08	2.32655e+08	2.2814e+08	1.22509e+08	1.24679e+08	1.29041e+08	1.61031e+08	9.19956e+07	1.4046e+08	2.04042e+08	2.4052e+08	2.63913e+08	1.42706e+08	1.4324e+08	1.42021e+08	2.4514e+08	2.87144e+08	2.44382e+08	1
P62269	Small ribosomal subunit protein uS13 OS=Homo sapiens OX=9606 GN=RPS18 PE=1 SV=3	0	49.25	45	10	406	10	152	17.7	10.99	227.77	10	0	1.538	1.033	0.709937	0.971341	27.16	19.17	113.3	75.7	111	1.17	2.14	4.11	1.87372e+08	1.77129e+08	1.60825e+08	106706516	1.0783e+08	1.16967e+08	1.23719e+08	5.84146e+07	9.97286e+07	1.87372e+08	1.83117e+08	1.86042e+08	1.24298e+08	1.23883e+08	1.28732e+08	1.88339e+08	1.82328e+08	1.73515e+08	1
P32969	Large ribosomal subunit protein uL6 OS=Homo sapiens OX=9606 GN=RPL9 PE=1 SV=1	0	49.211	41	8	414	8	192	21.9	9.95	186.31	8	0	1.263	1.179	0.930685	0.756844	17.47	24.24	116	89.4	94.6	4.13	7.25	17.33	3.02504e+08	2.7044e+08	2.57423e+08	197007634	2.1952e+08	1.99055e+08	1.5942e+08	6.66768e+07	1.68758e+08	3.02504e+08	2.79583e+08	2.97787e+08	2.29487e+08	2.52199e+08	2.19077e+08	2.42687e+08	2.08117e+08	2.93617e+08	1
P82094	TATA element modulatory factor OS=Homo sapiens OX=9606 GN=TMF1 PE=1 SV=2	0	49.119	13	12	109	12	1093	122.8	4.92	29.73	12	0	0.851	0.966	0.877877	0.997222	25.23	24.48	101.6	117.6	80.8	13.59	7.4	10.53	5.85406e+06	7.37464e+06	6.30511e+06	6.90843e+06	8.08638e+06	7.66664e+06	4.43207e+06	1.77465e+06	3.33474e+06	5.85406e+06	7.62396e+06	7.29376e+06	8.04738e+06	9.29016e+06	8.43778e+06	6.74699e+06	5.5392e+06	5.80202e+06	1
Q9UH99	SUN domain-containing protein 2 OS=Homo sapiens OX=9606 GN=SUN2 PE=1 SV=3	0	49.118	25	10	110	10	717	80.3	6.73	30.19	10	0	2.119	1.218	0.148348	0.619944	29.83	25.2	138.2	55.5	106.3	10.12	18.1	30.62	1.23025e+07	1.04688e+07	8.73421e+06	3728754	3.00407e+06	4.53124e+06	5.78102e+06	1.51313e+06	4.78497e+06	1.23025e+07	1.08227e+07	1.01037e+07	4.34349e+06	3.45127e+06	4.98701e+06	8.80051e+06	4.72291e+06	8.32523e+06	1
Q9ULW0	Targeting protein for Xklp2 OS=Homo sapiens OX=9606 GN=TPX2 PE=1 SV=2	0	49.115	22	13	109	13	747	85.6	9.23	39.65	13	0	2.901	0.565	0.00638607	0.0140612	14.55	33.01	87.7	6.8	205.5	29.7	13.16	10.2	5.60809e+06	9.79334e+06	6.31691e+06		539323	467110	1.12448e+07	6.45613e+06	9.67562e+06	5.60809e+06	1.01244e+07	7.30741e+06		619610	514094	1.71181e+07	2.01514e+07	1.68343e+07	1
P10586	Receptor-type tyrosine-protein phosphatase F OS=Homo sapiens OX=9606 GN=PTPRF PE=1 SV=2	0	49.037	10	14	108	12	1907	212.7	6.3	31.54	14	1	1.004	1.118	0.966249	0.852693	23.53	26.64	104.5	72.4	123.1	8.65	43.31	18.78	5.46881e+06	5.52439e+06	4.16586e+06	3.25189e+06	4.65268e+06	1.91003e+06	5406292	1.84349e+06	3.70017e+06	5.46881e+06	5.71115e+06	4.81908e+06	3.788e+06	5.3453e+06	2.10215e+06	8.23007e+06	5.75406e+06	6.43782e+06	1
A0FGR8	Extended synaptotagmin-2 OS=Homo sapiens OX=9606 GN=ESYT2 PE=1 SV=1	0	49.01	18	13	186	13	921	102.3	9.26	70.31	13	0	1.082	0.939	0.99952	0.980177	11.56	16.92	114.7	84.7	100.7	13.36	24.08	6.06	9.07599e+06	1.08155e+07	1.01996e+07	7.08846e+06	9.34914e+06	6.04646e+06	6.44882e+06	3052230	6.14534e+06	9.07599e+06	1.11812e+07	1.17989e+07	8.25709e+06	1.07409e+07	6.65464e+06	9.81712e+06	9.52687e+06	1.06921e+07	1
Q92598	Heat shock protein 105 kDa OS=Homo sapiens OX=9606 GN=HSPH1 PE=1 SV=1	0	48.979	20	14	134	12	858	96.8	5.39	59.84	14	2	0.968	1.172	0.964899	0.774853	27.18	35.84	107.9	107.7	84.4	10.16	12.84	6.99	5.77146e+07	6.41052e+07	6.10987e+07	5.67604e+07	6.32856e+07	5.10031e+07	3.48872e+07	1.65985e+07	2.67006e+07	5.77146e+07	6.62723e+07	7.0679e+07	6.61181e+07	7.27066e+07	5.61332e+07	5.31093e+07	5.18085e+07	4.64557e+07	1
Q96PC5	Melanoma inhibitory activity protein 2 OS=Homo sapiens OX=9606 GN=MIA2 PE=1 SV=4	0	48.898	11	14	109	14	1412	159.7	4.69	43.2	14	0	2.017	1.011	0.211283	0.965017	37.59	31.05	135.7	29.6	134.7	20.09	31.84	48.36	1.00632e+07	6.77351e+06	6.47472e+06	1.40491e+06	1.13693e+06	2.19301e+06	6.44851e+06	1.05011e+06	4.2736e+06	1.00632e+07	7.0025e+06	7.48997e+06	1.63653e+06	1.30618e+06	2.4136e+06	9.81664e+06	3.27768e+06	7.43551e+06	1
O00461	Golgi integral membrane protein 4 OS=Homo sapiens OX=9606 GN=GOLIM4 PE=1 SV=1	0	48.882	18	10	160	10	696	81.8	4.77	50.02	10	0	0.637	0.627	0.382721	0.1308	24.23	24.57	65.2	121.7	113.2	7.55	12.51	18.65	5.66364e+06	6.30958e+06	5547062	8.30158e+06	1.06539e+07	1.08805e+07	7.31741e+06	3.64988e+06	4.591e+06	5.66364e+06	6.52289e+06	6.41685e+06	9.67021e+06	1.22399e+07	1.19749e+07	1.11394e+07	1.13923e+07	7.98774e+06	1
Q9BTU6	Phosphatidylinositol 4-kinase type 2-alpha OS=Homo sapiens OX=9606 GN=PI4K2A PE=1 SV=1	0	48.859	27	12	186	12	479	54	8.29	73.21	12	0	0.978	1.033	0.965964	0.957242	29.93	23.57	101.9	107.9	90.2	12.54	20.22	20.1	9.44711e+06	1.07686e+07	1.05083e+07	7.74975e+06	1.18761e+07	10707705	6.47206e+06	2.19275e+06	5.7651e+06	9.44711e+06	1.11327e+07	1.21561e+07	9.0274e+06	1.3644e+07	1.17847e+07	9.8525e+06	6.8442e+06	1.00305e+07	1
Q14157	Ubiquitin-associated protein 2-like OS=Homo sapiens OX=9606 GN=UBAP2L PE=1 SV=2	0	48.832	8	7	150	7	1087	114.5	7.11	74.22	7	0	5.007	0.504	1.07136e-06	0.000501273	52.15	40.59	97.6	12.6	189.9	24.67	6.62	31.7	3.12519e+07	30319815	4.05365e+07	3.60619e+06	3.50959e+06	3.34812e+06	4.00734e+07	3.23241e+07	3.43165e+07	3.12519e+07	3.13448e+07	4.68927e+07	4.20071e+06	4.03205e+06	3.68489e+06	6.10042e+07	1.00893e+08	5.97063e+07	1
Q5K651	Sterile alpha motif domain-containing protein 9 OS=Homo sapiens OX=9606 GN=SAMD9 PE=1 SV=1	0	48.812	12	15	82	15	1589	184.2	7.83	27.72	15	0	0.866	0.871	0.908959	0.972518	25.51	14.66	79.2	129.1	91.8	6.62	49.79	31.2	538932		424233	421646	1.20543e+06	761841	421518	108256	342787	538932		490753	491159	1.38488e+06	838470	641681	337897	596406	1
Q13347	Eukaryotic translation initiation factor 3 subunit I OS=Homo sapiens OX=9606 GN=EIF3I PE=1 SV=1	0	48.728	36	9	174	9	325	36.5	5.64	70.11	9	0	0.787	1.438	0.768903	0.123428	27.3	33.89	100.7	142.7	56.7	18.71	8.79	31.88	2.20866e+07	2.11205e+07	25878083	2.75508e+07	2.72385e+07	2.46684e+07	8.16376e+06	6.10688e+06	6.0693e+06	2.20866e+07	2.18345e+07	2.99358e+07	3.20929e+07	3.12933e+07	2.71496e+07	1.24278e+07	1.90613e+07	1.05598e+07	1
Q13085	Acetyl-CoA carboxylase 1 OS=Homo sapiens OX=9606 GN=ACACA PE=1 SV=2	0	48.689	6	14	107	14	2346	265.4	6.37	39.42	14	0	1.029	0.688	0.9773	0.340635	23.13	27.79	84.3	81	134.7	15.04	17.93	17.68	2.96256e+06	3.38599e+06	2.24524e+06	2.0352e+06	2.95926e+06	2.58596e+06	2.69665e+06	1.862e+06	2720073	2.96256e+06	3.50046e+06	2.5973e+06	2.37073e+06	3.39979e+06	2.84607e+06	4.10515e+06	5.81184e+06	4.73257e+06	1
Q7L2J0	7SK snRNA methylphosphate capping enzyme OS=Homo sapiens OX=9606 GN=MEPCE PE=1 SV=1	0	48.647	23	11	170	11	689	74.3	9.57	54.83	11	0	1.064	1.018	0.995287	0.969162	23.97	32.84	109.2	94.6	96.2	8	30.79	10.09	1.38849e+07	1.37376e+07	10549511	1.18959e+07	6.3252e+06	1.09322e+07	8.03315e+06	4.38186e+06	6.43261e+06	1.38849e+07	1.4202e+07	1.22037e+07	1.38571e+07	7.2668e+06	1.20318e+07	1.2229e+07	1.3677e+07	1.11919e+07	1
P31946	14-3-3 protein beta/alpha OS=Homo sapiens OX=9606 GN=YWHAB PE=1 SV=3	0	48.621	52	11	173	7	246	28.1	4.83	94.18	11	0	1.016	0.907	0.970936	0.954256	30.81	23.1	91.6	100.1	108.2	12.17	15.88	2.57	1.46768e+07	17843312	1.3438e+07	1.28016e+07	1.77507e+07	15435186	1.20614e+07	5.76905e+06	1.08892e+07	1.46768e+07	1.84465e+07	1.55451e+07	1.49121e+07	2.03932e+07	1.69877e+07	1.83612e+07	1.80068e+07	1.89458e+07	1
Q01780	Exosome complex component 10 OS=Homo sapiens OX=9606 GN=EXOSC10 PE=1 SV=2	0	48.589	20	12	119	12	885	100.8	8.46	39.21	12	0	1.223	0.987	0.944169	0.993551	27.7	22.37	117.8	90.2	92	17.08	7.83	29.81	1.32323e+07	1.71847e+07	1.58865e+07	1.19014e+07	1.18409e+07	1.08727e+07	1.24417e+07	3332516	7.97565e+06	1.32323e+07	1.77656e+07	1.83775e+07	1.38635e+07	1.36036e+07	1.19663e+07	1.89402e+07	1.04017e+07	1.38766e+07	1
O95218	Zinc finger Ran-binding domain-containing protein 2 OS=Homo sapiens OX=9606 GN=ZRANB2 PE=1 SV=2	0	48.577	29	10	62	10	330	37.4	10.01	24.32	10	0	1.526	0.905	0.715914	0.954745	21.46	33.06	105.5	66.7	127.7	15.99	7.65	19.66	1.03309e+07	9.85605e+06	1.15732e+07	5.60634e+06	5.35381e+06	6.4986e+06	7.86322e+06	5.41788e+06	7.18673e+06	1.03309e+07	1.01892e+07	1.33878e+07	6.53062e+06	6.15081e+06	7.15226e+06	1.19703e+07	1.69107e+07	1.2504e+07	1
P22090	Small ribosomal subunit protein eS4, Y isoform 1 OS=Homo sapiens OX=9606 GN=RPS4Y1 PE=1 SV=2	0	48.563	22	7	342	7	263	29.4	10.24	156.7	7	0	1.28	1.081	0.930667	0.929972	12.64	21.37	114	85.1	100.9	1.08	6.17	7.3	1.52525e+08	1.4992e+08	1.346e+08	1.04292e+08	9.34762e+07	105112289	1.01314e+08	4.33899e+07	7.88589e+07	1.52525e+08	1.54988e+08	1.55705e+08	1.21486e+08	1.07392e+08	1.15685e+08	1.54232e+08	1.35432e+08	1.37204e+08	1
Q9H4B7	Tubulin beta-1 chain OS=Homo sapiens OX=9606 GN=TUBB1 PE=1 SV=1	0	48.559	16	9	726	3	451	50.3	5.17	353.43	9	0	1.231	100	0.932471	1.6177e-16	25.55		168.9	131.1		17.33	14.57		1.93644e+06	1.66749e+06	1.17779e+06	1.1482e+06	1369487	1.07084e+06				1.93644e+06	1.72386e+06	1.36246e+06	1.3375e+06	1.57336e+06	1.17855e+06				1
P52907	F-actin-capping protein subunit alpha-1 OS=Homo sapiens OX=9606 GN=CAPZA1 PE=1 SV=3	0	48.479	44	9	181	7	286	32.9	5.69	70.04	9	2	1.92	0.875	0.289498	0.892638	25.04	25	121.6	56.6	121.8	14	4.35	7.87	3.18906e+07	40470183	3.46587e+07	1.58874e+07	1.6257e+07	1.81908e+07	2.4612e+07	1.40377e+07	2.30938e+07	3.18906e+07	4.18383e+07	4.00933e+07	1.85067e+07	1.86771e+07	2.00205e+07	3.74672e+07	4.38155e+07	4.01802e+07	1
Q14203	Dynactin subunit 1 OS=Homo sapiens OX=9606 GN=DCTN1 PE=1 SV=3	0	48.386	16	13	102	13	1278	141.6	5.81	32.47	13	0	0.955	0.951	0.946482	0.994006	13.24	36.14	129.1	95.4	75.5	31.86	36.64	14.67	2.04497e+06	3.87547e+06	2.90155e+06	3.73996e+06	2046398	2.25448e+06	1.6263e+06	613250	1129164	2.04497e+06	4.00648e+06	3.35652e+06	4.35654e+06	2.35104e+06	2.48125e+06	2.47573e+06	1.91413e+06	1.9646e+06	1
P38159	RNA-binding motif protein, X chromosome OS=Homo sapiens OX=9606 GN=RBMX PE=1 SV=3	0	48.324	29	12	190	3	391	42.3	10.05	98.03	12	7	0.751	0.881	0.692839	0.926485	24.39	35.4	69.1	108.2	122.8	23.23	8.21	20.52	1.26039e+07	1.18465e+07	1.57236e+07	1.84775e+07	1.71792e+07	16601994	1.47145e+07	7.54591e+06	9.04478e+06	1.26039e+07	1.2247e+07	1.8189e+07	2.15237e+07	1.97365e+07	1.82719e+07	2.24001e+07	2.35529e+07	1.57367e+07	1
P78371	T-complex protein 1 subunit beta OS=Homo sapiens OX=9606 GN=CCT2 PE=1 SV=4	0	48.308	29	12	148	12	535	57.5	6.46	55.24	12	0	1.023	1.103	0.976582	0.892887	23.2	20.97	100.6	95.5	103.9	11.82	2.87	7.71	20062166	2.40396e+07	1.79502e+07	1.69241e+07	1.80193e+07	1.78945e+07	1.40987e+07	7.13859e+06	1.10147e+07	20062166	2.48523e+07	2.07648e+07	1.97142e+07	2.07017e+07	1.96945e+07	2.14626e+07	2.22815e+07	1.91642e+07	1
Q5JTV8	Torsin-1A-interacting protein 1 OS=Homo sapiens OX=9606 GN=TOR1AIP1 PE=1 SV=2	0	48.281	28	10	106	10	583	66.2	8.18	34.47	10	0	0.731	0.779	0.655018	0.774853	35.33	25.81	83.7	87.5	128.8	39.57	33.65	3.16	1.79174e+06	4.05323e+06	2.70537e+06	4.49923e+06	2.8468e+06	2.59337e+06	3.16136e+06	1.5525e+06	2.6272e+06	1.79174e+06	4.19026e+06	3.12957e+06	5.24099e+06	3.27058e+06	2.85422e+06	4.81257e+06	4.84578e+06	4.57098e+06	1
P83731	Large ribosomal subunit protein eL24 OS=Homo sapiens OX=9606 GN=RPL24 PE=1 SV=1	0	48.177	39	9	527	9	157	17.8	11.25	270.52	9	0	1.606	1.21	0.639378	0.677463	32.12	32.25	116	71.9	112.1	3	7.03	3.86	1.04823e+08	1.07657e+08	93394076	5.74158e+07	6.56536e+07	6.08698e+07	6.4321e+07	3.34584e+07	6.03815e+07	1.04823e+08	1.11297e+08	1.08038e+08	6.68816e+07	7.54272e+07	6.69923e+07	9.79167e+07	1.04433e+08	1.05056e+08	1
Q9Y613	FH1/FH2 domain-containing protein 1 OS=Homo sapiens OX=9606 GN=FHOD1 PE=1 SV=3	0	48.172	17	14	118	14	1164	126.5	6.39	35.77	14	0	1.317	0.924	0.906843	0.980177	28.94	22.12	123.8	64	112.1	25.37	50.95	32.92	4.99407e+06	6.53399e+06	3561838	2.21658e+06	4.28005e+06	1.70364e+06	2971087	988250	3.50015e+06	4.99407e+06	6.75488e+06	4.12034e+06	2.58201e+06	4.9172e+06	1.875e+06	4.52292e+06	3.08461e+06	6.0898e+06	1
Q86V81	THO complex subunit 4 OS=Homo sapiens OX=9606 GN=ALYREF PE=1 SV=3	0	48.131	44	7	286	7	257	26.9	11.15	117.93	7	0	0.87	1.088	0.893112	0.922241	35.94	29.39	101	125	74.1	5.62	26.4	5.41	3.21622e+07	3.38316e+07	2.72213e+07	3.41809e+07	4.01037e+07	2.42286e+07	1.66199e+07	7.29436e+06	1.35609e+07	3.21622e+07	3.49753e+07	3.14896e+07	3.9816e+07	4.60738e+07	2.66656e+07	2.53008e+07	2.27678e+07	2.35941e+07	1
Q9Y618	Nuclear receptor corepressor 2 OS=Homo sapiens OX=9606 GN=NCOR2 PE=1 SV=3	0	48.088	7	14	92	14	2514	273.5	7.59	23.88	14	0		0.01		1.6177e-16					300			64.33							645730	1.03503e+06	793458							983004	3.23061e+06	1.38051e+06	1
P34932	Heat shock 70 kDa protein 4 OS=Homo sapiens OX=9606 GN=HSPA4 PE=1 SV=4	0	48.054	17	11	175	10	840	94.3	5.19	64.66	11	0	1.067	1.341	0.99661	0.296542	41.87	44.22	106.1	97.2	96.6	40.89	21.77	11.93	6356977	13400013	7.18791e+06	6538964	7.83899e+06	5.24071e+06	4.72757e+06	2.42512e+06	5.16563e+06	6356977	1.3853e+07	8.31499e+06	7.617e+06	9.00594e+06	5.76785e+06	7.19684e+06	7.5695e+06	8.98753e+06	1
P07099	Epoxide hydrolase 1 OS=Homo sapiens OX=9606 GN=EPHX1 PE=1 SV=1	0	47.958	29	10	178	10	455	52.9	7.25	77.32	10	0	1.12	1.173	0.985529	0.730379	43.41	35.94	120.6	90.3	89.2	36.92	17.45	19.94	1.39066e+07	2.97095e+07	2.09906e+07	1.3937e+07	1.58255e+07	2.0637e+07	8.25501e+06	5.9003e+06	1.03197e+07	1.39066e+07	3.07139e+07	2.42819e+07	1.62347e+07	1.81814e+07	2.27128e+07	1.25667e+07	1.84165e+07	1.7955e+07	1
Q8NI35	InaD-like protein OS=Homo sapiens OX=9606 GN=PATJ PE=1 SV=3	0	47.937	10	14	112	14	1801	196.2	4.94	35.24	14	0	0.898	0.488	0.930667	0.0130752	38.37	40.98	67.6	62.3	170.1	52.3	43.27	47.14	1.47984e+06	1.36726e+06	2.87239e+06	690012	1.18614e+06	1.82315e+06	2.44608e+06	2.23174e+06	1.68175e+06	1.47984e+06	1.41349e+06	3.32278e+06	803769	1.36272e+06	2.00653e+06	3.72369e+06	6.96589e+06	2.92603e+06	1
Q14161	ARF GTPase-activating protein GIT2 OS=Homo sapiens OX=9606 GN=GIT2 PE=1 SV=2	0	47.862	21	13	126	10	759	84.5	7.23	41.95	13	2	0.851	0.663	0.877877	0.157368	17.7	28.93	89.6	102.8	107.5	12.9	9.04	31.44	8.90225e+06	7.1257e+06	8.22959e+06	8.7676e+06	1.00494e+07	8823408	7.01294e+06	5.44254e+06	5.62717e+06	8.90225e+06	7.36659e+06	9.52e+06	1.02131e+07	1.15455e+07	9.7109e+06	1.06759e+07	1.69877e+07	9.79055e+06	1
O15355	Protein phosphatase 1G OS=Homo sapiens OX=9606 GN=PPM1G PE=1 SV=1	0	47.796	26	10	187	10	546	59.2	4.36	81.6	10	0	1.115	0.598	0.990398	0.0263942	15.99	29.95	75.7	72.2	152	20.78	9.93	22.08	8.05469e+06	8.25833e+06	1.00787e+07	6.99271e+06	8.36471e+06	7.36701e+06	1.12622e+07	7.83519e+06	9.69417e+06	8.05469e+06	8.53752e+06	1.16591e+07	8.14555e+06	9.60993e+06	8.10801e+06	1.71446e+07	2.44559e+07	1.68666e+07	1
Q8WUA2	Peptidyl-prolyl cis-trans isomerase-like 4 OS=Homo sapiens OX=9606 GN=PPIL4 PE=1 SV=1	0	47.578	24	11	198	11	492	57.2	5.92	86.77	11	0	1.749	0.517	0.464671	0.000951228	24.56	37.09	98.8	45.3	155.9	9.86	15.01	33.23	2.08872e+07	2.19488e+07	2.19513e+07	8.9223e+06	8227185	1.14627e+07	23504695	1.92914e+07	19879880	2.08872e+07	2.26908e+07	2.53932e+07	1.03933e+07	9.45193e+06	1.26157e+07	3.57815e+07	6.02139e+07	3.45884e+07	1
P49757	Protein numb homolog OS=Homo sapiens OX=9606 GN=NUMB PE=1 SV=2	0	47.483	20	11	175	10	651	70.8	8.51	66.75	11	1	1.787	1.204	0.426776	0.632688	17.09	22.76	140.5	61.4	98.1	7.82	18.61	15.9	1.21883e+07	1.37768e+07	1.1302e+07	4.90431e+06	3.85526e+06	5.87554e+06	7.07685e+06	2.51171e+06	5.24823e+06	1.21883e+07	1.42425e+07	1.30741e+07	5.71285e+06	4.42917e+06	6.46653e+06	1.07732e+07	7.83977e+06	9.13123e+06	1
P42356	Phosphatidylinositol 4-kinase alpha OS=Homo sapiens OX=9606 GN=PI4KA PE=1 SV=4	0	47.459	9	14	79	14	2102	236.7	7.06	20.42	14	0	0.877	1.064	0.907599	0.944903	23	17.95	106.4	121.8	71.8	13.08	15.4	35.76	1.57223e+06	1.47051e+06	1.66168e+06	1.54494e+06	1.50667e+06	2.07018e+06	1.0928e+06	339997	484196	1.57223e+06	1.52022e+06	1.92224e+06	1.79965e+06	1.73096e+06	2.27841e+06	1.66358e+06	1.06123e+06	842438	1
P46782	Small ribosomal subunit protein uS7 OS=Homo sapiens OX=9606 GN=RPS5 PE=1 SV=4	0	47.28	53	9	228	9	204	22.9	9.72	114.84	9	0	1.352	0.943	0.888495	0.969162	33.72	31.64	94.4	73.3	132.3	6.43	10.26	7.26	6.21856e+07	64399782	6.11479e+07	4.43517e+07	5.09311e+07	4.3479e+07	5.44138e+07	3.04231e+07	5.359e+07	6.21856e+07	6.65769e+07	7.0736e+07	5.16636e+07	5.8513e+07	4.78523e+07	8.28348e+07	9.4959e+07	9.32396e+07	1
Q07955	Serine/arginine-rich splicing factor 1 OS=Homo sapiens OX=9606 GN=SRSF1 PE=1 SV=2	0	47.277	38	10	449	9	248	27.7	10.36	223.35	10	1	1.086	1.241	0.997621	0.589025	18.37	17.21	109.2	99.8	91	7.58	3.26	5.03	1.45089e+08	1.49399e+08	1.45721e+08	1.25576e+08	1.22845e+08	1.24559e+08	8.44862e+07	4.2627e+07	6.9218e+07	1.45089e+08	1.54449e+08	1.6857e+08	1.46279e+08	1.41133e+08	1.37088e+08	1.28614e+08	1.33051e+08	1.2043e+08	1
O75691	Small subunit processome component 20 homolog OS=Homo sapiens OX=9606 GN=UTP20 PE=1 SV=3	0	47.275	6	13	93	13	2785	318.2	7.39	25.62	13	0	1.004	1.058	0.966249	0.938792	19.68	19.9	104.7	97.6	97.7	20.93	7.95	29.74	1.12996e+07	7556989	10149583	7.98006e+06	9424805	9567057	7.82081e+06	2.05432e+06	6.06007e+06	1.12996e+07	7.81247e+06	1.1741e+07	9.29567e+06	1.08278e+07	1.05294e+07	1.19057e+07	6.41213e+06	1.05437e+07	1
Q9UN37	Vacuolar protein sorting-associated protein 4A OS=Homo sapiens OX=9606 GN=VPS4A PE=1 SV=1	0	47.253	26	10	216	6	437	48.9	7.8	82.11	10	3	0.731	1.083	0.655018	0.909671	28.73	28.26	90.5	123.9	85.6	5.14	4.32	14.67	2.2032e+07	2.28643e+07	1.85084e+07	2.74561e+07	2.56021e+07	2.74298e+07	1.3696e+07	8.19668e+06	1.11701e+07	2.2032e+07	2.36373e+07	2.14106e+07	3.19825e+07	2.94133e+07	3.01888e+07	2.08496e+07	2.55841e+07	1.94345e+07	1
Q9Y230	RuvB-like 2 OS=Homo sapiens OX=9606 GN=RUVBL2 PE=1 SV=3	0	47.217	27	11	286	11	463	51.1	5.64	145.38	11	0	1.13	1.105	0.9773	0.906925	20.71	22.43	102.3	98.3	99.4	16.46	3.98	13.63	4.2426e+07	4.16241e+07	4.85606e+07	3.55239e+07	3.63357e+07	3.52359e+07	2.74825e+07	1.55788e+07	2.13217e+07	4.2426e+07	4.30313e+07	5.61749e+07	4.13805e+07	4.17448e+07	3.87801e+07	4.18369e+07	4.86258e+07	3.7097e+07	1
P50993	Sodium/potassium-transporting ATPase subunit alpha-2 OS=Homo sapiens OX=9606 GN=ATP1A2 PE=1 SV=1	0	47.14	14	11	297	2	1020	112.2	5.66	140.37	11	0	0.899	0.987	0.920742	0.992464	27.77	23.62	115.7	107.5	76.8	22.26	25.23	26.68	1.16937e+07	1.74352e+07	1.50751e+07	1.73701e+07	1.41006e+07	10970730	1.13366e+07	3.46209e+06	6.65092e+06	1.16937e+07	1.80246e+07	1.74389e+07	2.02338e+07	1.61997e+07	1.20742e+07	1.72579e+07	1.08062e+07	1.15717e+07	1
O75955	Flotillin-1 OS=Homo sapiens OX=9606 GN=FLOT1 PE=1 SV=3	0	47.055	26	9	120	9	427	47.3	7.49	39.06	9	0	0.582	1.185	0.227504	0.682055	21.85	36.15	90.5	141.5	68	15.94	13.89	29.92	9.89916e+06	1.18295e+07	1.18156e+07	1.64211e+07	1.49967e+07	2.05468e+07	6.03337e+06	2.08494e+06	6.91847e+06	9.89916e+06	1.22295e+07	1.36683e+07	1.91283e+07	1.72291e+07	2.26135e+07	9.18468e+06	6.50767e+06	1.20372e+07	1
P29401	Transketolase OS=Homo sapiens OX=9606 GN=TKT PE=1 SV=3	0	47.025	25	11	79	11	623	67.8	7.66	22.4	11	0	1.246	1.186	0.932471	0.684473	32.05	31.7	110.1	95.5	94.4	25.94	19.62	8.93	1.98631e+07	2.79898e+07	15706674	20338463	1.49975e+07	1.54713e+07	1.04111e+07	5.45812e+06	1.08665e+07	1.98631e+07	2.89361e+07	1.81695e+07	2.36915e+07	1.72301e+07	1.70275e+07	1.5849e+07	1.70363e+07	1.89063e+07	1
P22695	Cytochrome b-c1 complex subunit 2, mitochondrial OS=Homo sapiens OX=9606 GN=UQCRC2 PE=1 SV=3	0	47.025	31	11	191	11	453	48.4	8.63	86.83	11	0	1.171	0.969	0.965964	0.994006	25.39	31.09	93.2	84.5	122.3	7.84	5.74	14.81	14873923	1.64638e+07	1.29037e+07	1.17222e+07	1.17864e+07	1.11689e+07	1.02365e+07	6.27451e+06	1.20094e+07	14873923	1.70204e+07	1.4927e+07	1.36548e+07	1.3541e+07	1.22923e+07	1.55831e+07	1.95845e+07	2.08947e+07	1
P61313	Large ribosomal subunit protein eL15 OS=Homo sapiens OX=9606 GN=RPL15 PE=1 SV=2	0	47.017	48	11	639	11	204	24.1	11.62	353.3	11	0	1.4	1.117	0.856748	0.897372	20.69	21.19	113.2	83.8	103	1.94	3.69	7.25	4.25985e+08	4.22785e+08	3.82598e+08	2.70949e+08	2.95267e+08	293885890	2.73762e+08	1.1561e+08	2.28542e+08	4.25985e+08	4.37078e+08	4.4259e+08	3.15619e+08	3.39222e+08	3.23446e+08	4.16751e+08	3.60853e+08	3.97633e+08	1
Q9ULG6	Cell cycle progression protein 1 OS=Homo sapiens OX=9606 GN=CCPG1 PE=1 SV=3	0	46.948	15	12	119	12	757	87.3	5.95	53.67	12	0	0.768	0.853	0.728998	0.839906	26.79	15.01	90.9	103	106.1	9.82	5.84	6.34	5.52579e+08	4.75803e+08	5.17948e+08	5.65029e+08	5.44802e+08	5.32031e+08	4.23638e+08	2.02704e+08	4.08551e+08	5.52579e+08	4.91888e+08	5.99163e+08	6.58182e+08	6.25904e+08	5.85545e+08	6.4491e+08	6.32697e+08	7.10826e+08	1
P07355	Annexin A2 OS=Homo sapiens OX=9606 GN=ANXA2 PE=1 SV=2	0	46.825	29	9	133	9	339	38.6	7.75	54.88	9	0	1.516	1.134	0.7267	0.860198	27.78	33.51	135.3	81.9	82.8	22.47	27.57	36.07	2.09168e+07	3.20028e+07	2.55419e+07	15356458	1.95479e+07	1.15495e+07	9.67963e+06	9.27232e+06	1.03938e+07	2.09168e+07	3.30847e+07	2.95469e+07	1.78882e+07	2.24579e+07	1.27112e+07	1.47354e+07	2.89415e+07	1.80839e+07	1
P31939	Bifunctional purine biosynthesis protein ATIC OS=Homo sapiens OX=9606 GN=ATIC PE=1 SV=3	0	46.812	27	11	188	11	592	64.6	6.71	64.79	11	0	0.958	1.074	0.950114	0.920599	28.8	20.96	100.9	103.8	95.3	20.55	26.14	12.12	1.02531e+07	1.47776e+07	1.02725e+07	1.04958e+07	7.42394e+06	1.33166e+07	7.37821e+06	3.13283e+06	7.17481e+06	1.02531e+07	1.52772e+07	1.18832e+07	1.22262e+07	8.5291e+06	1.46561e+07	1.12319e+07	9.77846e+06	1.24832e+07	1
P12235	ADP/ATP translocase 1 OS=Homo sapiens OX=9606 GN=SLC25A4 PE=1 SV=4	0	46.779	44	11	355	3	298	33	9.76	176.59	11	0	1.147	0.738	0.970936	0.542847	17.36	18.47	91.8	83.2	125	3.56	29.19	3.63	4.6474e+06	4.48284e+06	4.26435e+06	2.07357e+06	3.66825e+06	3.90459e+06	4159846	2.06234e+06	3.44944e+06	4.6474e+06	4.63439e+06	4.933e+06	2.41542e+06	4.21432e+06	4.29733e+06	6.33259e+06	6.43714e+06	6.00157e+06	1
Q9Y6M7	Sodium bicarbonate cotransporter 3 OS=Homo sapiens OX=9606 GN=SLC4A7 PE=1 SV=2	0	46.736	15	13	120	13	1214	136	6.71	40.41	13	0	0.894	1.176	0.913572	0.682055	20.78	41.82	113.8	117	69.2	11.59	13.58	26.45	7.03899e+06	6.14559e+06	4.81868e+06	4.58774e+06	6.09468e+06	5.93478e+06	2.91746e+06	823090	2.22003e+06	7.03899e+06	6.35336e+06	5.57426e+06	5.34409e+06	7.00197e+06	6.53172e+06	4.44128e+06	2.5691e+06	3.86256e+06	1
Q7RTP6	[F-actin]-monooxygenase MICAL3 OS=Homo sapiens OX=9606 GN=MICAL3 PE=1 SV=2	0	46.645	7	13	128	13	2002	224.2	5.55	40.83	13	0	1.099	0.912	0.994877	0.979065	14.04	14.04	106.1	79.1	114.8	139.85	24.94	38.7	7.59753e+07	5.09312e+06	5.12361e+06	3.79281e+06	4.49021e+06	2.80075e+06	1.96237e+06	2.05391e+06	3.88514e+06	7.59753e+07	5.2653e+06	5.927e+06	4.41811e+06	5.15865e+06	3.08246e+06	2.98734e+06	6.41082e+06	6.75964e+06	1
Q06210	Glutamine--fructose-6-phosphate aminotransferase [isomerizing] 1 OS=Homo sapiens OX=9606 GN=GFPT1 PE=1 SV=3	0	46.641	19	11	173	8	699	78.8	7.11	67.06	11	3	0.919	0.827	0.930685	0.807683	21.1	21.04	87.4	100.5	112.1	2.89	3.79	9.45	14176230	1.42994e+07	1.2097e+07	1.3995e+07	1.47131e+07	1.42374e+07	1.25577e+07	5.82712e+06	9.11808e+06	14176230	1.47828e+07	1.39938e+07	1.63023e+07	1.69033e+07	1.56694e+07	1.91167e+07	1.81881e+07	1.58643e+07	1
P55011	Solute carrier family 12 member 2 OS=Homo sapiens OX=9606 GN=SLC12A2 PE=1 SV=1	0	46.516	12	12	168	12	1212	131.4	6.4	70.09	12	0	0.916	0.968	0.930685	0.997622	17.56	23.51	96.4	111.2	92.4	14.56	7.99	14.38	1.10609e+07	1.22051e+07	8132481	1.13485e+07	1.11118e+07	10282235	8.36806e+06	3.09102e+06	6.09745e+06	1.10609e+07	1.26177e+07	9.40766e+06	1.32194e+07	1.2766e+07	1.13165e+07	1.27388e+07	9.64796e+06	1.06088e+07	1
O60762	Dolichol-phosphate mannosyltransferase subunit 1 OS=Homo sapiens OX=9606 GN=DPM1 PE=1 SV=1	0	46.471	45	12	210	12	260	29.6	9.57	105.65	12	0	1.298	1.099	0.91757	0.90923	28.71	38.85	119.1	91	89.9	5.16	6.95	8.82	8.8388e+07	8.75832e+07	7.08245e+07	5.49455e+07	6.38835e+07	6.13252e+07	4.23918e+07	2.43538e+07	3.83613e+07	8.8388e+07	9.05441e+07	8.19299e+07	6.4004e+07	7.33936e+07	6.74936e+07	6.45336e+07	7.60149e+07	6.67437e+07	1
Q8TDD1	ATP-dependent RNA helicase DDX54 OS=Homo sapiens OX=9606 GN=DDX54 PE=1 SV=2	0	46.467	19	13	122	13	881	98.5	10.02	47.94	13	0	1.264	1.179	0.930685	0.677463	17.43	9.25	97.8	104.9	97.3	32.97	5.52	10.47	3.51329e+06	4.97753e+06	2329802	3.08778e+06	3.49286e+06	3.42215e+06	2.29378e+06	1.15811e+06	1.69826e+06	3.51329e+06	5.1458e+06	2.69512e+06	3.59684e+06	4.01283e+06	3.76637e+06	3.49185e+06	3.6148e+06	2.95476e+06	1
P61224	Ras-related protein Rap-1b OS=Homo sapiens OX=9606 GN=RAP1B PE=1 SV=1	0	46.462	57	10	279	1	184	20.8	5.78	139.56	10	6	0.81	0.968	0.822245	0.991331	16.07	17.47	92.4	111.6	96	2.81	12.17	7.87	3.55289e+07	3.62684e+07	3.20293e+07	3.63359e+07	3.89448e+07	4.83051e+07	2.53008e+07	1.14445e+07	2.40254e+07	3.55289e+07	3.74945e+07	3.70516e+07	4.23263e+07	4.47424e+07	5.31638e+07	3.85157e+07	3.57216e+07	4.1801e+07	1
Q53GQ0	Very-long-chain 3-oxoacyl-CoA reductase OS=Homo sapiens OX=9606 GN=HSD17B12 PE=1 SV=2	0	46.453	26	10	184	10	312	34.3	9.32	77.55	10	0	0.952	0.948	0.94442	0.983159	24.37	32.53	96	102.7	101.2	2.07	13.78	3.6	2.26456e+07	2.10625e+07	19423791	1.89433e+07	2.09216e+07	2.61303e+07	1.55601e+07	7.64791e+06	1.28375e+07	2.26456e+07	2.17745e+07	2.24695e+07	2.20664e+07	2.40361e+07	2.87586e+07	2.36874e+07	2.38713e+07	2.23356e+07	1
Q9HAN9	Nicotinamide/nicotinic acid mononucleotide adenylyltransferase 1 OS=Homo sapiens OX=9606 GN=NMNAT1 PE=1 SV=1	0	46.387	40	11	147	11	279	31.9	8.87	62.38	11	0	1.421	4.206	0.842048	1.6177e-16	30.81	36.35	159.4	110.5	30.1	38.06	30.42	3.4	3.02086e+07	2.09311e+07	3.98799e+07	1.3192e+07	1.82193e+07	2.58504e+07	3.74398e+06	1.92748e+06	3.2502e+06	3.02086e+07	2.16387e+07	4.61332e+07	1.53669e+07	2.09315e+07	2.84505e+07	5.69951e+06	6.01622e+06	5.65493e+06	1
Q9H0U9	Testis-specific Y-encoded-like protein 1 OS=Homo sapiens OX=9606 GN=TSPYL1 PE=1 SV=3	0	46.374	32	10	98	10	437	49.2	5.45	30.34	10	0	1.027	1.061	0.976893	0.932667	11.59	41.67	93.1	102	104.9	35.96	38.95	1.63	8.52854e+06	1.77511e+07	12356559	1.37667e+07	6200639	1.42262e+07	1.05852e+07	5.23425e+06	9.09031e+06	8.52854e+06	1.83512e+07	1.42941e+07	1.60363e+07	7.1237e+06	1.56571e+07	1.6114e+07	1.63376e+07	1.5816e+07	1
P04439	HLA class I histocompatibility antigen, A alpha chain OS=Homo sapiens OX=9606 GN=HLA-A PE=1 SV=2	0	46.325	37	9	381	2	365	40.8	6	168.17	9	2	0.814	0.936	0.832075	0.960977	24.34	15.81	89.4	117.3	93.3	7.52	10.19	6.81	77464438	7.79533e+07	6.01028e+07	9.23259e+07	76491740	9.23601e+07	5.31033e+07	2.36206e+07	4.84964e+07	77464438	8.05886e+07	6.9527e+07	1.07547e+08	8.78787e+07	1.0165e+08	8.08398e+07	7.37265e+07	8.43775e+07	1
O00629	Importin subunit alpha-3 OS=Homo sapiens OX=9606 GN=KPNA4 PE=1 SV=1	0	46.245	31	10	132	7	521	57.9	4.96	58.66	10	2	0.944	1.037	0.937845	0.954745	35.65	55.45	93.6	110.6	95.9	20.47	22.56	20.52	1.10376e+07	1.6222e+07	1.24649e+07	1.00756e+07	1.60928e+07	1.5485e+07	7.2426e+06	4.7335e+06	9.63235e+06	1.10376e+07	1.67704e+07	1.44195e+07	1.17367e+07	1.84884e+07	1.70425e+07	1.10255e+07	1.47746e+07	1.6759e+07	1
O00410	Importin-5 OS=Homo sapiens OX=9606 GN=IPO5 PE=1 SV=4	0	46.239	16	11	123	11	1097	123.6	4.94	51.86	11	0	1.128	0.912	0.978238	0.956845	36.91	28.48	97.7	92.4	110	10.26	23.14	5.61	8.67178e+06	1.02342e+07	8.79994e+06	5.49226e+06	8.38235e+06	9175059	7223334	3.93424e+06	6.5877e+06	8.67178e+06	1.05802e+07	1.01798e+07	6.39773e+06	9.63019e+06	1.00979e+07	1.09962e+07	1.22799e+07	1.14617e+07	1
P62191	26S proteasome regulatory subunit 4 OS=Homo sapiens OX=9606 GN=PSMC1 PE=1 SV=1	0	46.234	29	11	279	11	440	49.2	6.21	108.57	11	0	1.017	0.851	0.970936	0.830521	20.76	26.82	98.4	93.9	107.7	10.7	5.13	16.46	2.49768e+07	2.98121e+07	2.5352e+07	2.40336e+07	25290181	2.38391e+07	2.1102e+07	8.76587e+06	2.18651e+07	2.49768e+07	3.082e+07	2.93273e+07	2.79958e+07	2.9055e+07	2.62369e+07	3.21239e+07	2.73608e+07	3.80424e+07	1
Q9H307	Pinin OS=Homo sapiens OX=9606 GN=PNN PE=1 SV=5	0	46.233	20	13	132	13	717	81.6	7.14	38.16	13	0	0.86	1.094	0.888077	0.903222	19.24	23.29	92.9	117.6	89.5	10.23	12.72	7.41	1.0455e+07	1.07746e+07	1.10103e+07	1.21016e+07	1.23115e+07	1.01964e+07	7.04676e+06	3.44401e+06	5.4125e+06	1.0455e+07	1.11388e+07	1.27367e+07	1.40967e+07	1.41443e+07	1.1222e+07	1.07274e+07	1.07497e+07	9.41705e+06	1
Q9Y5Q8	General transcription factor 3C polypeptide 5 OS=Homo sapiens OX=9606 GN=GTF3C5 PE=1 SV=2	0	46.146	23	11	177	11	519	59.5	6.9	73.56	11	0	1.273	0.669	0.930685	0.153824	17.74	39.31	96.5	71.3	132.1	11.45	6.04	33.24	1.13675e+07	1.16471e+07	1.22028e+07	7.6413e+06	8.5013e+06	7.94266e+06	8.84827e+06	8.08778e+06	9.47609e+06	1.13675e+07	1.20409e+07	1.41162e+07	8.90107e+06	9.76685e+06	8.74156e+06	1.34698e+07	2.52442e+07	1.64872e+07	1
Q9H7N4	Splicing factor, arginine/serine-rich 19 OS=Homo sapiens OX=9606 GN=SCAF1 PE=1 SV=3	0	46.054	13	10	78	10	1312	139.2	9.25	24.97	10	0	0.852	0.618	0.877877	0.174295	42.23	43.54	75.9	123	101.1	29.82	34.22	22.25	3.49297e+06	1.80984e+06	2.47149e+06	3.97578e+06	2.17733e+06	4.6711e+06	2.50106e+06	1.37169e+06	1.56232e+06	3.49297e+06	1.87102e+06	2.85902e+06	4.63124e+06	2.50145e+06	5.14094e+06	3.80739e+06	4.28144e+06	2.71824e+06	1
Q13123	Protein Red OS=Homo sapiens OX=9606 GN=IK PE=1 SV=3	0	46.009	21	11	180	11	557	65.6	6.64	84.81	11	0	1.437	0.69	0.822245	0.193988	18.55	31.63	99.9	59.4	140.7	6.1	10.27	15.76	1.2602e+07	1.37738e+07	1.16155e+07	6.85827e+06	8.24495e+06	7.21699e+06	1.13596e+07	7.47854e+06	1.08785e+07	1.2602e+07	1.42394e+07	1.34369e+07	7.98894e+06	9.47234e+06	7.94291e+06	1.72928e+07	2.33426e+07	1.89272e+07	1
P06748	Nucleophosmin OS=Homo sapiens OX=9606 GN=NPM1 PE=1 SV=2	0	45.949	27	8	260	8	294	32.6	4.78	131.29	8	0	1.494	1.144	0.749134	0.852693	24.23	22.32	113	73.4	113.6	10.78	3.25	6.3	2.05667e+08	1.99769e+08	2.13614e+08	110608129	116705485	1.24896e+08	134560697	6.65162e+07	1.31879e+08	2.05667e+08	2.06523e+08	2.47109e+08	1.28843e+08	1.34079e+08	1.37458e+08	2.04843e+08	2.07616e+08	2.29452e+08	1
P62834	Ras-related protein Rap-1A OS=Homo sapiens OX=9606 GN=RAP1A PE=1 SV=1	0	45.947	57	10	280	1	184	21	6.67	134.79	10	0	0.826	1.078	0.862585	0.929972	26.76	23.74	92.3	122	85.7	22.9	15.7	12.14	1.18677e+06	1.63049e+06	977232		1220879	1592779	723210	351708	774712	1.18677e+06	1.68562e+06	1.13046e+06		1.40263e+06	1.75299e+06	1.10095e+06	1.09778e+06	1.3479e+06	1
P50990	T-complex protein 1 subunit theta OS=Homo sapiens OX=9606 GN=CCT8 PE=1 SV=4	0	45.936	24	11	228	11	548	59.6	5.6	96.68	11	0	1.039	1.089	0.985529	0.908189	19.21	33.44	108	96.7	95.2	12.15	17.88	17.78	1.80213e+07	2.15362e+07	1.9522e+07	1.35913e+07	19822409	18106295	9.68773e+06	6.72348e+06	1.12797e+07	1.80213e+07	2.22643e+07	2.2583e+07	1.5832e+07	2.27733e+07	1.99275e+07	1.47478e+07	2.09859e+07	1.96252e+07	1
Q6T4R5	Actin remodeling regulator NHS OS=Homo sapiens OX=9606 GN=NHS PE=1 SV=2	0	45.881	9	12	90	12	1651	179	6.86	25.03	12	0	100	1.092	1.5566e-16	0.900451		20.52	150.5		149.5	13.36		16.38		2.05502e+06	2.21977e+06				1.14562e+06	743236	1.36934e+06		2.12449e+06	2.56783e+06				1.74399e+06	2.31985e+06	2.38247e+06	1
Q7L0Y3	tRNA methyltransferase 10 homolog C OS=Homo sapiens OX=9606 GN=TRMT10C PE=1 SV=2	0	45.868	32	10	117	10	403	47.3	9.36	55.65	10	0	0.938	0.977	0.933859	0.994006	20.73	15.01	99.2	106.3	94.5	15.76	15.19	22.01	1.20026e+07	1.22139e+07	8.0192e+06	9.35209e+06	12880777	1.16883e+07	6806258	4.98253e+06	6.57292e+06	1.20026e+07	1.26268e+07	9.27662e+06	1.08939e+07	1.47983e+07	1.2864e+07	1.03613e+07	1.55519e+07	1.1436e+07	1
Q5QJE6	Deoxynucleotidyltransferase terminal-interacting protein 2 OS=Homo sapiens OX=9606 GN=DNTTIP2 PE=1 SV=2	0	45.789	21	11	114	11	756	84.4	6.16	40.18	11	0	2.153	0.984	0.13202	0.992464	23.33	16.92	130.2	45.9	123.9	10.12	40.82	10.7	9.16112e+06	8.44034e+06	9.13072e+06	2.76882e+06	2.88925e+06	1.2734e+06	5.7252e+06	3.12068e+06	4.52129e+06	9.16112e+06	8.72568e+06	1.05624e+07	3.2253e+06	3.31936e+06	1.40149e+06	8.71554e+06	9.74053e+06	7.86647e+06	1
Q8TEQ6	Gem-associated protein 5 OS=Homo sapiens OX=9606 GN=GEMIN5 PE=1 SV=3	0	45.743	12	13	70	13	1508	168.5	6.62	24.94	13	0	1.425	1.107	0.833965	0.880405	52.45	25.76	166.8	83.9	49.3	5.11	55.45	41.75	2758406	2.44851e+06	2402279	1.19115e+06	1.2356e+06	347771	535132	234450	865133	2758406	2.53129e+06	2.77896e+06	1.38752e+06	1.41953e+06	382751	814638	731785	1.50522e+06	1
Q96SB4	SRSF protein kinase 1 OS=Homo sapiens OX=9606 GN=SRPK1 PE=1 SV=2	0	45.616	22	11	116	10	655	74.3	6.16	49.34	11	0	1.295	1.029	0.920742	0.958844	10.02	35.34	111.5	82.7	105.8	22.8	4.94	9.68	1.00276e+07	1.04506e+07	1.30511e+07	6.87536e+06	6.61523e+06	7.62348e+06	6.47906e+06	3.78314e+06	5.89102e+06	1.00276e+07	1.08039e+07	1.50976e+07	8.00886e+06	7.60001e+06	8.39028e+06	9.86316e+06	1.18083e+07	1.02496e+07	1
P09429	High mobility group protein B1 OS=Homo sapiens OX=9606 GN=HMGB1 PE=1 SV=3	0	45.611	35	8	260	6	215	24.9	5.74	108.19	8	1	1.084	1.274	0.998872	0.482053	34.85	44.41	105	114.9	80.2	16.64	18.38	15.93	3.11528e+07	2.85587e+07	3.44889e+07	3.34519e+07	2.96715e+07	2.43568e+07	13434814	9.00832e+06	1.36796e+07	3.11528e+07	2.95242e+07	3.98968e+07	3.89668e+07	3.40886e+07	2.68068e+07	2.0452e+07	2.81175e+07	2.38007e+07	1
Q7KZ85	Transcription elongation factor SPT6 OS=Homo sapiens OX=9606 GN=SUPT6H PE=1 SV=2	0	45.382	10	14	150	14	1726	198.9	4.91	45.73	14	0	100	0.612	1.5566e-16	0.482053		18.36	112.9		187.1	17.13		17.83		980832	687099				804927	562857	855424		1.01399e+06	794837				1.22535e+06	1.75684e+06	1.48833e+06	1
O43290	U4/U6.U5 tri-snRNP-associated protein 1 OS=Homo sapiens OX=9606 GN=SART1 PE=1 SV=1	0	45.38	18	12	131	12	800	90.2	6.13	47.84	12	0	1.388	0.944	0.862585	0.994006	23.66	19.51	102.9	79.7	117.3	17.1	29.93	18.65	4.70891e+06	4.79928e+06	5.53851e+06	1.86047e+06	3.41197e+06	3.49379e+06	3.53974e+06	2.40544e+06	3.252e+06	4.70891e+06	4.96153e+06	6.40695e+06	2.16719e+06	3.91989e+06	3.84521e+06	5.38858e+06	7.50807e+06	5.65805e+06	1
P21359	Neurofibromin OS=Homo sapiens OX=9606 GN=NF1 PE=1 SV=2	0	45.347	7	15	82	15	2839	319.2	7.39	20.39	15	0	1.721	0.421	0.490995	0.00242178	34.07	78.93	59.4	34.5	206.1	63.23	15.04	66.8	881584	2.64724e+06	989430	570999	517458	724712	2.61123e+06	2.08398e+06	731199	881584	2.73673e+06	1.14457e+06	665135	594490	797606	3.97511e+06	6.50469e+06	1.27219e+06	1
P62266	Small ribosomal subunit protein uS12 OS=Homo sapiens OX=9606 GN=RPS23 PE=1 SV=3	0	45.306	50	6	437	6	143	15.8	10.49	183.67	6	0	1.704	1.037	0.517354	0.969844	18.39	20.39	116.6	68.6	114.7	5.37	3.23	8.04	2.7783e+08	2.98142e+08	2.47886e+08	144850775	1.51445e+08	1.48206e+08	1.8524e+08	8.04518e+07	169030432	2.7783e+08	3.08222e+08	2.86755e+08	1.68731e+08	1.7399e+08	1.63113e+08	2.81993e+08	2.51113e+08	2.94091e+08	1
Q96CW5	Gamma-tubulin complex component 3 OS=Homo sapiens OX=9606 GN=TUBGCP3 PE=1 SV=2	0	45.299	20	12	114	12	907	103.5	8.12	43.33	12	0	1.033	0.955	0.979492	0.997207	18.13	28.59	99.2	95.9	104.9	40.29	6.12	7.76	2.79403e+06	4.12936e+06	5.5218e+06	3.5415e+06	3.34259e+06	3.94394e+06	2.96659e+06	1.62971e+06	2536971	2.79403e+06	4.26896e+06	6.38763e+06	4.12536e+06	3.84019e+06	4.34064e+06	4.51608e+06	5.0868e+06	4.414e+06	1
P61254	Large ribosomal subunit protein uL24 OS=Homo sapiens OX=9606 GN=RPL26 PE=1 SV=1	0	45.283	52	11	627	3	145	17.2	10.55	299.87	11	7	1.471	1.18	0.7831	0.752383	20.48	26.98	114.9	85.5	99.6	0.68	6.33	13.39	3.96576e+08	3.81945e+08	3.38257e+08	2.80624e+08	2.55803e+08	2.66355e+08	2.68958e+08	1.01638e+08	1.96625e+08	3.96576e+08	3.94857e+08	3.91296e+08	3.26888e+08	2.93883e+08	2.93146e+08	4.09438e+08	3.17241e+08	3.42101e+08	1
Q7L7X3	Serine/threonine-protein kinase TAO1 OS=Homo sapiens OX=9606 GN=TAOK1 PE=1 SV=1	0	45.268	17	13	103	11	1001	116	7.65	31.25	13	0	0.934	0.841	0.932471	0.906345	14.19	18.78	103.8	94	102.2	16.44	17.21	26.54	3.49335e+06	4.65356e+06	3.97241e+06	3.571e+06	2.9845e+06	4.41268e+06	2.97162e+06	1.02167e+06	3.17396e+06	3.49335e+06	4.81088e+06	4.59529e+06	4.15973e+06	3.42879e+06	4.85653e+06	4.52373e+06	3.18892e+06	5.52227e+06	1
Q32P51	Heterogeneous nuclear ribonucleoprotein A1-like 2 OS=Homo sapiens OX=9606 GN=HNRNPA1L2 PE=2 SV=2	0	45.246	33	8	198	7	320	34.2	9	90.79	8	0	1.95	1.079	0.263154	0.932667	43.56	36.84	130.9	64.9	104.2	16.2	3.25	5.86	3.48367e+07	4.55124e+07	4.03294e+07	1.98538e+07	2.02571e+07	1.99206e+07	2.59322e+07	1.18932e+07	2.01848e+07	3.48367e+07	4.7051e+07	4.66531e+07	2.31269e+07	2.32726e+07	2.19243e+07	3.9477e+07	3.71221e+07	3.51189e+07	1
O60313	Dynamin-like 120 kDa protein, mitochondrial OS=Homo sapiens OX=9606 GN=OPA1 PE=1 SV=3	0	45.205	15	13	116	13	960	111.6	7.87	41.58	13	0	0.777	0.997	0.745506	0.973489	24.77	36.61	97.9	121.6	80.5	3.24	2.92	4.88	6.76378e+06	6.86715e+06	5.77448e+06	6.97519e+06	7.31267e+06	7.82604e+06	3.49699e+06	1.78078e+06	3.37184e+06	6.76378e+06	7.09931e+06	6.67992e+06	8.12515e+06	8.40127e+06	8.61322e+06	5.32351e+06	5.5583e+06	5.86657e+06	1
O43865	S-adenosylhomocysteine hydrolase-like protein 1 OS=Homo sapiens OX=9606 GN=AHCYL1 PE=1 SV=2	0	45.139	26	12	104	2	530	58.9	6.89	34.02	12	4	0.998	1.18	0.965964	0.708267	34.28	13.68	93.8	139	67.3	53.39	9	69.01	3.93457e+06	4.05713e+06	1.03579e+06	5.32513e+06	4.51128e+06	5.29844e+06	1.85404e+06	2.25279e+06	1.12278e+06	3.93457e+06	4.19428e+06	1.1982e+06	6.20305e+06	5.18286e+06	5.83138e+06	2.82242e+06	7.03158e+06	1.9535e+06	1
P61981	14-3-3 protein gamma OS=Homo sapiens OX=9606 GN=YWHAG PE=1 SV=2	0	45.129	44	9	147	7	247	28.3	4.89	74.67	9	0	0.926	0.853	0.932471	0.893157	28.71	16.29	155.7	85.7	58.7	23	80.88	13.21	1.27138e+07	1.19471e+07	7.03213e+06	5.83432e+06	1.86032e+07	4.59845e+06	3.67133e+06	1.49147e+06	2.5037e+06	1.27138e+07	1.2351e+07	8.13478e+06	6.79619e+06	2.13726e+07	5.06098e+06	5.58892e+06	4.65531e+06	4.35612e+06	1
P61421	V-type proton ATPase subunit d 1 OS=Homo sapiens OX=9606 GN=ATP6V0D1 PE=1 SV=1	0	45.119	33	12	152	12	351	40.3	5	70.45	12	0	0.387	0.999	0.00405797	0.983159	17.78	24.83	63.9	177.3	58.8	6.45	5.02	17.55	1.2591e+07	1.20639e+07	9.66991e+06	2.78328e+07	30135340	3.25443e+07	7.53639e+06	2.74427e+06	6.94431e+06	1.2591e+07	1.24717e+07	1.11862e+07	3.24213e+07	3.46214e+07	3.58177e+07	1.14727e+07	8.56563e+06	1.20822e+07	1
Q86YQ8	Copine-8 OS=Homo sapiens OX=9606 GN=CPNE8 PE=1 SV=2	0	45.093	26	11	158	11	564	63.1	5.96	55.8	11	0	1.13	1.557	0.9773	0.0415765	24.91	27.75	121.3	117.9	60.8	21.13	19.9	26.38	1.22387e+07	1.76104e+07	11847305	1.19301e+07	1.15994e+07	8.56741e+06	4.51039e+06	1.60322e+06	4.94534e+06	1.22387e+07	1.82057e+07	1.3705e+07	1.38969e+07	1.33262e+07	9.42915e+06	6.86622e+06	5.0041e+06	8.60425e+06	1
Q9H9T3	Elongator complex protein 3 OS=Homo sapiens OX=9606 GN=ELP3 PE=1 SV=2	0	44.963	24	12	182	12	547	62.2	8.88	87.69	12	0	1.291	1.012	0.925757	0.972518	12.44	21.67	110.5	54.9	134.5	9.39	11.95	7.61	1.02501e+07	1.19476e+07	9.61654e+06	4.55937e+06	4.81291e+06	6.00498e+06	9.0743e+06	3.83367e+06	7.78364e+06	1.02501e+07	1.23515e+07	1.11244e+07	5.31104e+06	5.52939e+06	6.60899e+06	1.38139e+07	1.1966e+07	1.35425e+07	1
Q14254	Flotillin-2 OS=Homo sapiens OX=9606 GN=FLOT2 PE=1 SV=2	0	44.926	29	11	165	11	428	47	5.25	71.43	11	0	0.764	1.071	0.717304	0.922241	26.33	18.79	78.9	143.6	77.5	35.06	14.28	20.62	8.17742e+06	1.18392e+07	1.46001e+07	1.48381e+07	1.93971e+07	2.04538e+07	6.60695e+06	3.85097e+06	8.69514e+06	8.17742e+06	1.22394e+07	1.68894e+07	1.72843e+07	2.22847e+07	2.25112e+07	1.00578e+07	1.202e+07	1.51284e+07	1
Q9NX63	MICOS complex subunit MIC19 OS=Homo sapiens OX=9606 GN=CHCHD3 PE=1 SV=1	0	44.917	40	10	142	10	227	26.1	8.28	65.88	10	0	0.574	1.108	0.204729	0.876204	27.33	30.46	82.4	145	72.6	3.59	8.89	13.09	1.75554e+07	1.7542e+07	1.45911e+07	2.72371e+07	2.33045e+07	2.80588e+07	1.25622e+07	4.95022e+06	8.77614e+06	1.75554e+07	1.81351e+07	1.6879e+07	3.17275e+07	2.67737e+07	3.08811e+07	1.91236e+07	1.5451e+07	1.52694e+07	1
P35268	Large ribosomal subunit protein eL22 OS=Homo sapiens OX=9606 GN=RPL22 PE=1 SV=2	0	44.852	59	6	355	5	128	14.8	9.19	199.62	6	1	1.606	1.362	0.639378	0.259917	29.34	29.5	122.3	81.5	96.3	4.14	3.65	1.31	4.67577e+08	4.72964e+08	4.39126e+08	2.79753e+08	2.68049e+08	2.99879e+08	2.58369e+08	1.23066e+08	2.21298e+08	4.67577e+08	4.88953e+08	5.07981e+08	3.25874e+08	3.07952e+08	3.30042e+08	3.93319e+08	3.84123e+08	3.8503e+08	1
Q9ULT8	E3 ubiquitin-protein ligase HECTD1 OS=Homo sapiens OX=9606 GN=HECTD1 PE=1 SV=4	0	44.847	6	14	101	14	2610	289.2	5.35	31.99	14	0	0.974	0.826	0.965964	0.850693	18.48	26.15	102.1	88.8	109.1	17.36	26.26	35.12	5.63302e+06	6.19542e+06	6.83182e+06	2.92799e+06	4.95988e+06	5059126	4.49491e+06	3.37238e+06	3.07998e+06	5.63302e+06	6.40486e+06	7.90305e+06	3.41071e+06	5.69824e+06	5.56799e+06	6.84265e+06	1.05262e+07	5.35876e+06	1
Q96CW1	AP-2 complex subunit mu OS=Homo sapiens OX=9606 GN=AP2M1 PE=1 SV=2	0	44.837	28	11	241	11	435	49.6	9.54	144.31	11	0	1.265	1.098	0.930685	0.909374	23.66	26.88	107	92.5	100.6	10.26	3.82	8.01	3.25737e+07	3.25124e+07	3.39508e+07	2.54167e+07	2.39306e+07	2.64011e+07	2.36769e+07	1.01277e+07	1.80104e+07	3.25737e+07	3.36116e+07	3.92743e+07	2.96069e+07	2.7493e+07	2.90567e+07	3.60436e+07	3.16115e+07	3.13357e+07	1
Q9UNQ2	Probable dimethyladenosine transferase OS=Homo sapiens OX=9606 GN=DIMT1 PE=1 SV=1	0	44.805	43	11	184	11	313	35.2	9.99	75.55	11	0	1.57	0.99	0.68273	0.992464	19.02	18.08	115.9	70.9	113.2	4.83	28.95	15.7	1.4206e+07	1.47752e+07	1.34779e+07	8.02336e+06	4778184	8.93659e+06	1.04789e+07	4.78098e+06	6.7154e+06	1.4206e+07	1.52747e+07	1.55913e+07	9.34611e+06	5.48949e+06	9.83547e+06	1.59522e+07	1.49228e+07	1.16839e+07	1
Q5T6F2	Ubiquitin-associated protein 2 OS=Homo sapiens OX=9606 GN=UBAP2 PE=1 SV=1	0	44.799	15	10	105	10	1119	117	7.34	39.68	10	0	1.012	0.396	0.969459	2.37548e-06	66.55	53.34	59.9	29	211.1	36.65	24.03	54.66	3.58387e+06	3.99941e+06	5.98146e+06	2.01636e+06	1.24608e+06	1.81739e+06	9.57097e+06	9.76663e+06	6.49057e+06	3.58387e+06	4.13462e+06	6.91936e+06	2.34879e+06	1.43158e+06	2.00019e+06	1.457e+07	3.04844e+07	1.12928e+07	1
Q9NUL7	Probable ATP-dependent RNA helicase DDX28 OS=Homo sapiens OX=9606 GN=DDX28 PE=1 SV=2	0	44.778	25	9	188	9	540	59.5	10.42	73.34	9	0	1.146	1.063	0.970936	0.954745	19.45	24.42	126.6	84.8	88.6	5.66	19.72	10.83	2.86672e+07	2.82519e+07	2.26753e+07	1.64869e+07	1.59626e+07	23590145	1.2812e+07	6.42486e+06	1.36242e+07	2.86672e+07	2.9207e+07	2.62308e+07	1.9205e+07	1.83389e+07	2.59629e+07	1.95039e+07	2.00538e+07	2.37043e+07	1
P10398	Serine/threonine-protein kinase A-Raf OS=Homo sapiens OX=9606 GN=ARAF PE=1 SV=2	0	44.776	20	10	142	7	606	67.5	9.01	61.29	10	0	0.942	0.916	0.936613	0.97053	16.47	17.59	108.8	97.1	94.2	25.83	26.15	16.27	5.35729e+06	4.44366e+06	6.47568e+06	3.9871e+06	6.28781e+06	4344225	3.0462e+06	1.13813e+06	2.80822e+06	5.35729e+06	4.59389e+06	7.49107e+06	4.64442e+06	7.22385e+06	4.78119e+06	4.63727e+06	3.55243e+06	4.88593e+06	1
Q86V48	Leucine zipper protein 1 OS=Homo sapiens OX=9606 GN=LUZP1 PE=1 SV=2	0	44.731	13	12	111	12	1076	120.2	8.5	33.31	12	0	1.062	0.912	0.995177	0.980177	24.18	40.19	104.4	98.3	97.3	18.73	22.08	39.99	3.03741e+06	4.03308e+06	3.78969e+06	2.5273e+06	3.41709e+06	4.20545e+06	4.31735e+06	1.24533e+06	1.79598e+06	3.03741e+06	4.16943e+06	4.38391e+06	2.94396e+06	3.92577e+06	4.62846e+06	6.57236e+06	3.88703e+06	3.12477e+06	1
O60306	RNA helicase aquarius OS=Homo sapiens OX=9606 GN=AQR PE=1 SV=4	0	44.628	9	11	93	11	1485	171.2	6.37	23.53	11	0	1.128	1.089	0.978238	0.89988	21.36	38.53	124.7	99.8	75.6	53.59	43.13	26.25	965537	2837540	2.99031e+06	894417	2.35744e+06	2.13278e+06	1.7477e+06	541738	1.02217e+06	965537	2.93347e+06	3.4592e+06	1.04187e+06	2.70838e+06	2.34731e+06	2.66054e+06	1.69092e+06	1.77844e+06	1
Q6Y7W6	GRB10-interacting GYF protein 2 OS=Homo sapiens OX=9606 GN=GIGYF2 PE=1 SV=1	0	44.605	10	11	186	11	1299	150	5.54	77.27	11	0	1.932	0.573	0.278199	0.0126221	26.77	32.24	97	43.5	159.5	13.82	8.79	29.93	1.83212e+07	1.79859e+07	2.01021e+07	7.6272e+06	7.26572e+06	6.7715e+06	2.00794e+07	1.51355e+07	1.59557e+07	1.83212e+07	1.8594e+07	2.32542e+07	8.88465e+06	8.34734e+06	7.45261e+06	3.05672e+07	4.72422e+07	2.77608e+07	1
Q13247	Serine/arginine-rich splicing factor 6 OS=Homo sapiens OX=9606 GN=SRSF6 PE=1 SV=2	0	44.54	27	11	265	8	344	39.6	11.43	108.29	11	2	1.416	1.053	0.84406	0.954745	29.87	40.4	120.5	69.8	109.7	13.85	10.64	15.17	3.10774e+07	3.43469e+07	35437524	2.10215e+07	1.79085e+07	1.85051e+07	1.96434e+07	1.27549e+07	1.859e+07	3.10774e+07	3.5508e+07	4.09942e+07	2.44872e+07	2.05745e+07	2.03664e+07	2.99034e+07	3.98115e+07	3.23442e+07	1
P48643	T-complex protein 1 subunit epsilon OS=Homo sapiens OX=9606 GN=CCT5 PE=1 SV=1	0	44.511	20	10	132	10	541	59.6	5.66	55.45	10	0	0.994	1.014	0.965964	0.972212	28.39	27.41	101.1	90.5	108.4	13.42	17.32	19.38	1.31966e+07	1.15545e+07	1.34247e+07	1.01352e+07	9817645	1.39552e+07	1.13489e+07	3.75389e+06	8.13268e+06	1.31966e+07	1.19451e+07	1.55297e+07	1.18061e+07	1.12792e+07	1.53589e+07	1.72766e+07	1.1717e+07	1.41498e+07	1
Q08379	Golgin subfamily A member 2 OS=Homo sapiens OX=9606 GN=GOLGA2 PE=1 SV=3	0	44.456	13	11	160	11	1002	113	5.02	71.67	11	0	1.498	0.976	0.743537	0.992464	22.42	31.65	133	80.2	86.8	16.98	34.7	25.19	7.28512e+06	9.92875e+06	8.02668e+06	5.53725e+06	4.87135e+06	2.80168e+06	5.59491e+06	1.94019e+06	3.06269e+06	7.28512e+06	1.02644e+07	9.28528e+06	6.45014e+06	5.59652e+06	3.08349e+06	8.5172e+06	6.05587e+06	5.32869e+06	1
Q9H814	Phosphorylated adapter RNA export protein OS=Homo sapiens OX=9606 GN=PHAX PE=1 SV=1	0	44.376	28	11	125	11	394	44.4	5.4	58.98	11	0	1.335	0.641	0.896664	0.0717499	28.79	34.72	95.1	72.8	132.1	18.86	7.32	24.33	1.43871e+07	1.45325e+07	1.73453e+07	9.53682e+06	1.11083e+07	1.04544e+07	1.2051e+07	9.26691e+06	1.19905e+07	1.43871e+07	1.50238e+07	2.00651e+07	1.11091e+07	1.27619e+07	1.1506e+07	1.83455e+07	2.89246e+07	2.08619e+07	1
P33992	DNA replication licensing factor MCM5 OS=Homo sapiens OX=9606 GN=MCM5 PE=1 SV=5	0	44.312	20	11	185	11	734	82.2	8.37	82.05	11	0	0.914	0.905	0.930685	0.952679	17.93	20.12	93.9	102.3	103.8	8.23	11.11	14.94	1.96889e+07	2.08211e+07	2.00773e+07	2.32642e+07	2.04152e+07	1.98681e+07	1.56345e+07	9.16693e+06	1.22963e+07	1.96889e+07	2.1525e+07	2.32254e+07	2.70996e+07	2.34543e+07	2.18665e+07	2.38006e+07	2.86126e+07	2.1394e+07	1
P02768	Albumin OS=Homo sapiens OX=9606 GN=ALB PE=1 SV=2	0	44.102	12	9	139	9	609	69.3	6.28	71.25	9	0	1.115	0.352	0.989758	4.83752e-09	29.78	51.76	66.4	63.2	170.4	22.14	9.36	30.32	1.16866e+08	1.31807e+08	1.54934e+08	9.41747e+07	1.12936e+08	1.17709e+08	2.11322e+08	1.75453e+08	2.00909e+08	1.16866e+08	1.36263e+08	1.79228e+08	1.09701e+08	1.29748e+08	1.29548e+08	3.21698e+08	5.47638e+08	3.49556e+08	1
P15121	Aldo-keto reductase family 1 member B1 OS=Homo sapiens OX=9606 GN=AKR1B1 PE=1 SV=3	0	43.986	48	11	249	11	316	35.8	6.98	105.6	11	0	0.884	0.908	0.906843	0.933246	22.32	20.05	92.7	105.4	101.9	13.4	9.77	3.09	8.10738e+07	1.00917e+08	7.48612e+07	7.50224e+07	85687317	96618737	6.41698e+07	3.04756e+07	5.27797e+07	8.10738e+07	1.04329e+08	8.65995e+07	8.73908e+07	9.84432e+07	1.06337e+08	9.76864e+07	9.51231e+07	9.18299e+07	1
Q96EB6	NAD-dependent protein deacetylase sirtuin-1 OS=Homo sapiens OX=9606 GN=SIRT1 PE=1 SV=2	0	43.865	18	10	100	10	747	81.6	4.67	24.26	10	0	1.024	0.823	0.976582	0.731304	37.99	40.23	92.4	115.3	92.3	6.39	6.16	10.29	5.24579e+07	5.65219e+07	5.09926e+07	5.808e+07	6.35068e+07	6.95186e+07	4.18964e+07	16616152	3.35798e+07	5.24579e+07	5.84327e+07	5.89883e+07	6.76552e+07	7.29607e+07	7.65111e+07	6.37795e+07	5.18637e+07	5.84245e+07	1
Q58FF8	Putative heat shock protein HSP 90-beta 2 OS=Homo sapiens OX=9606 GN=HSP90AB2P PE=1 SV=2	0	43.836	17	10	319	2	381	44.3	4.84	158.21	10	0	0.995	0.982	0.965964	0.994006	10.35	8.57	99.2	99.7	101	17.05	19.07	2.88	23519784	30002182	28456798	19602914	27141992	30310000	21320604	10119786	17611228	23519784	3.10165e+07	3.29189e+07	2.28347e+07	3.11825e+07	3.33587e+07	3.24566e+07	3.15867e+07	3.06413e+07	1
Q9NXF1	Testis-expressed protein 10 OS=Homo sapiens OX=9606 GN=TEX10 PE=1 SV=2	0	43.821	15	13	106	13	929	105.6	9.36	30.89	13	0	0.839	1.039	0.862585	0.944903	44.66	38.74	66.7	98.5	134.8	66.07	32.11	3.95	2.26852e+06	2.04109e+06	5390686	2.28879e+06	2.91359e+06	4.49962e+06	2.83269e+06	1.46771e+06	2.67234e+06	2.26852e+06	2.1101e+06	6.23595e+06	2.66613e+06	3.34733e+06	4.95222e+06	4.31225e+06	4.58113e+06	4.64953e+06	1
P62277	Small ribosomal subunit protein uS15 OS=Homo sapiens OX=9606 GN=RPS13 PE=1 SV=2	0	43.82	40	8	428	8	151	17.2	10.54	190.93	8	0	1.21	1.077	0.954467	0.937218	29.22	40.96	97.2	111.1	91.7	3.23	6.07	11.44	5.41253e+08	4.92922e+08	4.45415e+08	5.05706e+08	4.6376e+08	5.41748e+08	3.28354e+08	1.28798e+08	2.79327e+08	5.41253e+08	5.09586e+08	5.15257e+08	5.89078e+08	5.32798e+08	5.9624e+08	4.99857e+08	4.02014e+08	4.85994e+08	1
P35241	Radixin OS=Homo sapiens OX=9606 GN=RDX PE=1 SV=1	0	43.812	15	11	225	4	583	68.5	6.37	111.68	11	0	1.366	1.048	0.877877	0.939661	51.93	49.52	108.2	72.7	119	39.75	21.44	22.06	4.56956e+06	9.9196e+06	5.87545e+06	3.57452e+06	3.97427e+06	5.61247e+06	4.91031e+06	3.10548e+06	3.6181e+06	4.56956e+06	1.02549e+07	6.79673e+06	4.16383e+06	4.5659e+06	6.177e+06	7.47502e+06	9.69309e+06	6.29503e+06	1
P60842	Eukaryotic initiation factor 4A-I OS=Homo sapiens OX=9606 GN=EIF4A1 PE=1 SV=1	0	43.728	31	10	272	4	406	46.1	5.48	150.65	10	3	1.011	0.817	0.968906	0.708877	32.99	26.91	96.2	94.8	109	12.25	12.77	5.54	3.43782e+07	3.73442e+07	3.79515e+07	2.76087e+07	3.3123e+07	3.77815e+07	2.64319e+07	1.40174e+07	2.5733e+07	3.43782e+07	3.86067e+07	4.39024e+07	3.21604e+07	3.80538e+07	4.15817e+07	4.02377e+07	4.37522e+07	4.4772e+07	1
O94874	E3 UFM1-protein ligase 1 OS=Homo sapiens OX=9606 GN=UFL1 PE=1 SV=2	0	43.688	18	12	143	12	794	89.5	6.79	53.42	12	0	1.399	1	0.857331	0.983822	25.71	19.6	105.3	79.2	115.5	6.96	5.44	6.94	19193841	2.12183e+07	1.84836e+07	1.35753e+07	1.52152e+07	1.46083e+07	1.53982e+07	7.90505e+06	12345570	19193841	2.19356e+07	2.13819e+07	1.58133e+07	1.74802e+07	1.60776e+07	2.34409e+07	2.46739e+07	2.14797e+07	1
Q13155	Aminoacyl tRNA synthase complex-interacting multifunctional protein 2 OS=Homo sapiens OX=9606 GN=AIMP2 PE=1 SV=2	0	43.68	31	8	236	8	320	35.3	8.22	78.39	8	0	1.189	0.727	0.965964	0.279695	26.05	32.23	91.5	69.6	139	1.33	13.02	10.67	2.10301e+07	2.02603e+07	1.85602e+07	1.62421e+07	1.28121e+07	1.45334e+07	2.09864e+07	1.17132e+07	1.70741e+07	2.10301e+07	2.09452e+07	2.14705e+07	1.89198e+07	1.47194e+07	1.59953e+07	3.19479e+07	3.65602e+07	2.97067e+07	1
P04181	Ornithine aminotransferase, mitochondrial OS=Homo sapiens OX=9606 GN=OAT PE=1 SV=1	0	43.676	26	8	146	8	439	48.5	7.03	55.42	8	0	0.986	0.909	0.965964	0.969162	38.59	32.74	103.1	96.1	100.9	9.17	24.55	32.13	6.41329e+06	7.45804e+06	6.14114e+06	4.09522e+06	6.88757e+06	6.0146e+06	4.56632e+06	3.5028e+06	3.51979e+06	6.41329e+06	7.71017e+06	7.10408e+06	4.77037e+06	7.91289e+06	6.61957e+06	6.95136e+06	1.09332e+07	6.12397e+06	1
P19367	Hexokinase-1 OS=Homo sapiens OX=9606 GN=HK1 PE=1 SV=3	0	43.585	15	11	105	10	917	102.4	6.8	44.9	11	0	0.885	0.993	0.907599	0.980177	33.23	37.34	100.4	118.1	81.5	25.98	17.16	7.99	3.87235e+06	6320272	5.28155e+06	5.37142e+06	6.25816e+06	7969869	3258469	1.72909e+06	2.64493e+06	3.87235e+06	6.53394e+06	6.10971e+06	6.25697e+06	7.18978e+06	8.77151e+06	4.96041e+06	5.39697e+06	4.60183e+06	1
Q16531	DNA damage-binding protein 1 OS=Homo sapiens OX=9606 GN=DDB1 PE=1 SV=1	0	43.544	11	11	127	11	1140	126.9	5.26	30.94	11	0	0.896	1.092	0.916551	0.885988	30.69	26.63	90.9	110.8	98.3	10.71	6.73	15.12	5.23211e+06	4.5936e+06	5.08045e+06	4.88449e+06	5.55056e+06	5.84856e+06	3.71931e+06	1.84891e+06	2.49579e+06	5.23211e+06	4.7489e+06	5.87707e+06	5.68976e+06	6.37684e+06	6.43683e+06	5.66195e+06	5.77097e+06	4.34235e+06	1
P00966	Argininosuccinate synthase OS=Homo sapiens OX=9606 GN=ASS1 PE=1 SV=2	0	43.531	25	10	208	10	412	46.5	8.02	103.7	10	0	1.178	0.935	0.965964	0.958844	29.55	28.28	104.6	92.1	103.3	16.94	3.53	5.33	2.92373e+07	3.91953e+07	2.82462e+07	2.47182e+07	2.36885e+07	2.64143e+07	1.96985e+07	10669284	18548684	2.92373e+07	4.05204e+07	3.26752e+07	2.87934e+07	2.72148e+07	2.90711e+07	2.99872e+07	3.33018e+07	3.22723e+07	1
O75694	Nuclear pore complex protein Nup155 OS=Homo sapiens OX=9606 GN=NUP155 PE=1 SV=1	0	43.495	11	12	117	12	1391	155.1	6.16	42.83	12	0	1.032	0.856	0.978238	0.922241	22.19	23.22	89.6	102.8	107.7	41.27	4.4	12.45	2.60429e+06	4.32028e+06	5.42558e+06	4.16243e+06	4.6062e+06	4.65459e+06	2.82607e+06	1.73074e+06	3.08514e+06	2.60429e+06	4.46634e+06	6.27632e+06	4.84866e+06	5.2919e+06	5.12277e+06	4.30217e+06	5.40212e+06	5.36775e+06	1
P29597	Non-receptor tyrosine-protein kinase TYK2 OS=Homo sapiens OX=9606 GN=TYK2 PE=1 SV=3	0	43.468	12	11	116	9	1187	133.6	7.15	29.99	11	0	0.958	1.12	0.965964	0.900451	26.19	20.24	99.5	80.5	120	7.57	15.39	49.03	1.36543e+06	1.40421e+06	1.37104e+06	1.00526e+06	1.31894e+06	1.06627e+06	1.65078e+06		700711	1.36543e+06	1.45169e+06	1.58602e+06	1.17099e+06	1.51529e+06	1.17352e+06	2.51301e+06		1.21915e+06	1
O75746	Electrogenic aspartate/glutamate antiporter SLC25A12, mitochondrial OS=Homo sapiens OX=9606 GN=SLC25A12 PE=1 SV=2	0	43.449	21	13	167	8	678	74.7	8.38	84.07	13	0	1.192	0.911	0.965964	0.963043	34.28	19.41	97.4	76.3	126.3	9.85	25.06	12.58	5.04876e+06	5329645	5.30865e+06	3.70261e+06	2.48825e+06	4.33237e+06	3.9002e+06	2.44214e+06	4.10541e+06	5.04876e+06	5.50982e+06	6.14106e+06	4.31303e+06	2.85867e+06	4.76814e+06	5.93732e+06	7.62259e+06	7.14288e+06	1
Q8IVT2	Mitotic interactor and substrate of PLK1 OS=Homo sapiens OX=9606 GN=MISP PE=1 SV=1	0	43.434	18	9	104	9	679	75.3	6.83	30.75	9	0	1.92	0.63	0.28914	0.152149	16.87	65.71	100.6	33.7	165.7	6.87	49.7	34.23	3.16082e+06	3407693	2.6907e+06	1.57033e+06	923321	608836	3.4216e+06	2.78364e+06	2.76298e+06	3.16082e+06	3.5229e+06	3.11261e+06	1.82921e+06	1.06077e+06	670076	5.20874e+06	8.68852e+06	4.80722e+06	1
Q8WXX5	DnaJ homolog subfamily C member 9 OS=Homo sapiens OX=9606 GN=DNAJC9 PE=1 SV=1	0	43.423	37	9	146	9	260	29.9	5.73	70.11	9	0	2.581	1.115	0.0248121	0.865039	21.38	34.02	146	31.9	122	4.87	31.42	12.55	2.29575e+07	2.07582e+07	1.80757e+07	2.81138e+06	5.44302e+06	4.26562e+06	1.17806e+07	4.64283e+06	1.05607e+07	2.29575e+07	2.146e+07	2.091e+07	3.27487e+06	6.2533e+06	4.69468e+06	1.79338e+07	1.44916e+07	1.83742e+07	1
Q08AF3	Schlafen family member 5 OS=Homo sapiens OX=9606 GN=SLFN5 PE=1 SV=1	0	43.422	16	9	123	9	891	101	8.22	36.19	9	0	1.1	1.49	0.994877	0.0961439	22.49	31.26	132.3	104.5	63.1	4.75	17.94	25.16	8.72065e+06	9.27272e+06	7.86315e+06	6.11036e+06	8.38117e+06	6.52847e+06	3.01012e+06	1.39037e+06	1.595e+06	8.72065e+06	9.58621e+06	9.0961e+06	7.11774e+06	9.62883e+06	7.18513e+06	4.58234e+06	4.33975e+06	2.77509e+06	1
Q12899	Tripartite motif-containing protein 26 OS=Homo sapiens OX=9606 GN=TRIM26 PE=1 SV=1	0	43.404	23	11	173	11	539	62.1	5.03	73.17	11	0	1.128	0.849	0.978238	0.881041	27.26	25.73	104.3	86.4	109.3	2.69	19.96	21.36	1.45826e+07	1.38199e+07	1.30254e+07	7.87264e+06	1.05113e+07	1.25213e+07	1.00436e+07	6.56136e+06	7.90387e+06	1.45826e+07	1.42871e+07	1.50678e+07	9.17054e+06	1.2076e+07	1.37807e+07	1.52895e+07	2.04799e+07	1.37517e+07	1
Q8NI27	THO complex subunit 2 OS=Homo sapiens OX=9606 GN=THOC2 PE=1 SV=2	0	43.388	9	13	130	13	1593	182.7	8.44	50.2	13	0	1.031	0.95	0.978093	0.992464	16.68	23.49	90.5	99.9	109.6	10.7	6.53	4.45	8.44306e+06	7.57826e+06	8.34324e+06	8.00043e+06	9.04955e+06	8.43894e+06	6.71313e+06	3.27438e+06	5.43259e+06	8.44306e+06	7.83446e+06	9.65147e+06	9.3194e+06	1.03967e+07	9.28776e+06	1.02195e+07	1.02203e+07	9.452e+06	1
Q8TD19	Serine/threonine-protein kinase Nek9 OS=Homo sapiens OX=9606 GN=NEK9 PE=1 SV=2	0	43.361	15	11	129	11	979	107.1	5.74	37.65	11	0	0.862	0.825	0.888573	0.870628	32.95	25.8	93.2	105.6	101.2	18.35	27.71	29.93	3.91773e+06	4.59101e+06	4.90173e+06	4.61517e+06	5.20897e+06	3.07238e+06	2.83357e+06	2.43191e+06	2.96253e+06	3.91773e+06	4.74621e+06	5.67033e+06	5.37604e+06	5.98441e+06	3.38142e+06	4.31358e+06	7.59067e+06	5.15443e+06	1
O14974	Protein phosphatase 1 regulatory subunit 12A OS=Homo sapiens OX=9606 GN=PPP1R12A PE=1 SV=1	0	43.317	15	12	46	12	1030	115.2	5.4	12	12	0	1.32	0.769	0.892581	0.856928	33.35	32.33	111.7	71.2	117.1	53.63	1.46	31.64		2.81432e+06	1.13204e+06	1078282		1.11792e+06	1.34391e+06	1.06141e+06	1.10738e+06		2.90946e+06	1.30955e+06	1.25605e+06		1.23037e+06	2.04584e+06	3.31296e+06	1.9267e+06	1
Q9UMS4	Pre-mRNA-processing factor 19 OS=Homo sapiens OX=9606 GN=PRPF19 PE=1 SV=1	0	43.304	31	10	165	10	504	55.1	6.61	55.04	10	0	1.183	1.242	0.965964	0.567566	15.85	19.76	113.2	96	90.8	7.59	4.66	9.94	2.39965e+07	2.36172e+07	2.3784e+07	1.77842e+07	1.90154e+07	1.80927e+07	1.46183e+07	5.87932e+06	1.12552e+07	2.39965e+07	2.44156e+07	2.75133e+07	2.07162e+07	2.18461e+07	1.99125e+07	2.22536e+07	1.8351e+07	1.95825e+07	1
Q6ZVM7	TOM1-like protein 2 OS=Homo sapiens OX=9606 GN=TOM1L2 PE=1 SV=1	0	43.3	23	9	141	9	507	55.5	4.79	63.88	9	0	1.349	1.25	0.888573	0.511191	20.49	32.3	139.3	106.9	53.7	8.9	1.65	62.1	2.68697e+07	2.37896e+07	1.94373e+07	1.59002e+07	1.66609e+07	1.71501e+07	10367003	1.20751e+06	5.44811e+06	2.68697e+07	2.45939e+07	2.24851e+07	1.85215e+07	1.91411e+07	1.88752e+07	1.57818e+07	3.76899e+06	9.47901e+06	1
Q86UU1	Pleckstrin homology-like domain family B member 1 OS=Homo sapiens OX=9606 GN=PHLDB1 PE=1 SV=1	0	43.255	11	13	85	13	1377	151.1	8.63	27.07	13	0	1.486	0.685	0.740853	0.404459	20.94	25.8	87.4	33.9	178.8	24.47	20.37	65.33		1.80426e+06	2.28714e+06	854955	648613		2.9859e+06	3.01619e+06	1.40788e+06		1.86526e+06	2.64577e+06	995906	745169		4.54548e+06	9.41437e+06	2.44954e+06	1
Q96E39	RNA binding motif protein, X-linked-like-1 OS=Homo sapiens OX=9606 GN=RBMXL1 PE=1 SV=1	0	43.163	28	11	161	2	390	42.1	9.89	83.88	11	0																															1
Q6P158	Putative ATP-dependent RNA helicase DHX57 OS=Homo sapiens OX=9606 GN=DHX57 PE=1 SV=2	0	43.149	12	14	112	13	1386	155.5	7.71	40.69	14	0	0.92	0.655	0.938671	0.606163	21.1	59.39	79.1	88	132.9	21.57	10.75	62.1	586740	847365	562359		680403	609922	448564	561364		586740	876012	650537		781691	671270	682854	1.75218e+06		1
O14646	Chromodomain-helicase-DNA-binding protein 1 OS=Homo sapiens OX=9606 GN=CHD1 PE=1 SV=2	0	43.136	9	13	62	12	1710	196.6	7.14	14.44	13	0	100	1.236	1.5566e-16	0.739824		0	165.8		134.2					871791						233644			901263						729270		1
Q8IY81	pre-rRNA 2'-O-ribose RNA methyltransferase FTSJ3 OS=Homo sapiens OX=9606 GN=FTSJ3 PE=1 SV=2	0	43.13	16	10	163	10	847	96.5	8.4	68.16	10	0	1.076	0.811	0.999941	0.722947	17.91	13.74	198.7	43.1	58.2	60.59	12.98	44.52	2.44974e+07	21604274	4.56636e+06	4.15927e+06	4.52157e+06	3644462	4.3012e+06	4.25178e+06	3.72247e+06	2.44974e+07	2.23346e+07	5.28237e+06	4.84498e+06	5.19467e+06	4.01104e+06	6.54777e+06	1.3271e+07	6.47661e+06	1
Q9UBX3	Mitochondrial dicarboxylate carrier OS=Homo sapiens OX=9606 GN=SLC25A10 PE=1 SV=2	0	43.055	40	9	165	9	287	31.3	9.54	76.25	9	0	1.68	0.975	0.550928	0.994006	35.3	22.86	117.2	72.2	110.6	2.33	14.07	8.15	2.46347e+07	2.35877e+07	2.20353e+07	1.01425e+07	1.33468e+07	1.37792e+07	1.46312e+07	8.33701e+06	1.33642e+07	2.46347e+07	2.43852e+07	2.54905e+07	1.18147e+07	1.53337e+07	1.51652e+07	2.22733e+07	2.60222e+07	2.3252e+07	1
O00139	Kinesin-like protein KIF2A OS=Homo sapiens OX=9606 GN=KIF2A PE=1 SV=3	0	42.991	17	12	214	11	706	79.9	6.68	106.96	12	0	0.989	1.144	0.965964	0.806945	18.36	19.36	105.5	97.1	97.5	13.6	11	7.19	1.84641e+07	1.90985e+07	2.06167e+07	1.55994e+07	1.83609e+07	1.55372e+07	1.07429e+07	5.84744e+06	1.0799e+07	1.84641e+07	1.97441e+07	2.38494e+07	1.81711e+07	2.10942e+07	1.71e+07	1.63541e+07	1.82515e+07	1.87888e+07	1
P11498	Pyruvate carboxylase, mitochondrial OS=Homo sapiens OX=9606 GN=PC PE=1 SV=2	0	42.983	12	11	124	11	1178	129.6	6.84	48.47	11	0	0.837	0.809	0.862585	0.84808	31.31	26.28	86	113.8	100.2	27.99	2.05	19.63	6.07861e+06	7.604e+06	3.83232e+06	6.80236e+06	6.99957e+06	7.49695e+06	4.62734e+06	3.13107e+06	4.07136e+06	6.07861e+06	7.86107e+06	4.43323e+06	7.92382e+06	8.04156e+06	8.25103e+06	7.04426e+06	9.77297e+06	7.08364e+06	1
Q9NVP1	ATP-dependent RNA helicase DDX18 OS=Homo sapiens OX=9606 GN=DDX18 PE=1 SV=2	0	42.975	25	12	127	12	670	75.4	9.5	43.34	12	0	1.61	1.181	0.638574	0.710934	14.69	16.14	134.3	56.5	109.1	9.03	24.36	7.97	1.32575e+07	1.20075e+07	1.28083e+07	4.787e+06	4.00379e+06	6.73533e+06	7.07522e+06	3.71432e+06	5.67935e+06	1.32575e+07	1.24134e+07	1.48167e+07	5.5762e+06	4.59981e+06	7.4128e+06	1.07707e+07	1.15934e+07	9.88134e+06	1
Q8ND56	Protein LSM14 homolog A OS=Homo sapiens OX=9606 GN=LSM14A PE=1 SV=3	0	42.924	21	10	92	10	463	50.5	9.52	34.67	10	0	1.045	0.557	0.990398	0.0120324	32.04	41.09	72.4	73.3	154.4	30.03	20.96	43.09	4.18591e+06	2.92518e+06	4.82482e+06	2.90164e+06	4.49618e+06	3.84993e+06	4678835	5.05929e+06	5.13136e+06	4.18591e+06	3.02407e+06	5.58135e+06	3.38001e+06	5.1655e+06	4.23717e+06	7.12265e+06	1.57915e+07	8.92789e+06	1
P12270	Nucleoprotein TPR OS=Homo sapiens OX=9606 GN=TPR PE=1 SV=3	0	42.882	7	12	56	12	2363	267.1	5.02	14.74	12	0	100	1.259	1.5566e-16	0.708542		19.09	77.1		222.9			124.32			1110154				669894	1.19024e+06	1.14278e+07			1.28423e+06				1.01979e+06	3.71508e+06	1.98828e+07	1
Q9H2G2	STE20-like serine/threonine-protein kinase OS=Homo sapiens OX=9606 GN=SLK PE=1 SV=1	0	42.805	13	12	84	11	1235	142.6	5.15	23.82	12	0	0.672	1.066	0.488421	0.929972	30.39	13.6	108.8	121.4	69.8	48.86	21.43	29.49	944042	2.75969e+06	1.8258e+06	2.44872e+06	2.05067e+06	1.67603e+06	719803	536054		944042	2.85299e+06	2.11209e+06	2.85243e+06	2.35594e+06	1.84461e+06	1.09576e+06	1.67318e+06		1
P04406	Glyceraldehyde-3-phosphate dehydrogenase OS=Homo sapiens OX=9606 GN=GAPDH PE=1 SV=3	0	42.793	26	7	207	7	335	36	8.46	84.57	7	0	1.178	1.23	0.965964	0.617902	53.72	39.21	109.4	104.4	86.2	38.06	3.26	10.7	3.80363e+07	73580443	3.90761e+07	3.57069e+07	3.86448e+07	3.91975e+07	2.26955e+07	1.34367e+07	2.04643e+07	3.80363e+07	7.6068e+07	4.52033e+07	4.15937e+07	4.43977e+07	4.31402e+07	3.45496e+07	4.19397e+07	3.56052e+07	1
P01024	Complement C3 OS=Homo sapiens OX=9606 GN=C3 PE=1 SV=2	0	42.719	8	12	113	12	1663	187	6.4	46.54	12	0	0.914	1.292	0.930685	0.391605	44.15	38.36	104.3	118.8	76.9	13.76	8.42	13.93	1.93422e+07	16697401	1.95814e+07	1.83675e+07	2.17602e+07	2.00311e+07	8.90461e+06	5.60802e+06	8.1991e+06	1.93422e+07	1.72619e+07	2.26517e+07	2.13956e+07	2.49996e+07	2.20459e+07	1.35556e+07	1.75042e+07	1.42654e+07	1
Q16658	Fascin OS=Homo sapiens OX=9606 GN=FSCN1 PE=1 SV=3	0	42.625	31	11	78	11	493	54.5	7.24	23.42	11	0	0.818	1.133	0.846334	0.892506	14.64	42.5	131.3	150.6	18.1	4.41	18.2	39.37	1.52599e+06	1.58086e+06	1.43429e+06	1.32243e+06	1.63137e+06	2.02129e+06	197126		97351.5	1.52599e+06	1.6343e+06	1.65919e+06	1.54045e+06	1.87423e+06	2.2246e+06	300087		169379	1
Q8WV44	E3 ubiquitin-protein ligase TRIM41 OS=Homo sapiens OX=9606 GN=TRIM41 PE=1 SV=3	0	42.601	21	11	84	11	630	71.6	5.06	26.51	11	0	1.9	0.627	0.306108	0.0961439	21.25	39.52	150.5	30.9	118.6	30.78	83.76	37.37	1.01548e+07	8.62041e+06	4.61027e+06	1.57281e+06	753638	4.5002e+06	4.61328e+06	3.27564e+06	2739806	1.01548e+07	8.91184e+06	5.33317e+06	1.83211e+06	865828	4.95285e+06	7.02286e+06	1.02242e+07	4.76691e+06	1
Q9H6S1	5-azacytidine-induced protein 2 OS=Homo sapiens OX=9606 GN=AZI2 PE=1 SV=1	0	42.559	26	10	138	10	392	44.9	6.6	74.71	10	0	1.204	0.563	0.961928	0.0140612	16.65	25.15	80.1	70.9	149	9.66	12.88	21.67	8.02242e+06	7.92653e+06	8.24385e+06	5.17098e+06	6.31296e+06	7075095	1.00112e+07	6223888	7.27261e+06	8.02242e+06	8.1945e+06	9.5365e+06	6.02348e+06	7.25274e+06	7.78674e+06	1.52401e+07	1.94265e+07	1.26534e+07	1
Q96PK6	RNA-binding protein 14 OS=Homo sapiens OX=9606 GN=RBM14 PE=1 SV=2	0	42.485	15	9	225	9	669	69.4	9.67	103.37	9	0	1.176	0.957	0.965964	0.980177	27.49	25.41	104.8	91.8	103.3	1.82	10.21	23.97	2.74158e+07	2.73085e+07	23612729	2.36968e+07	19776113	2.18219e+07	1.65389e+07	1.23526e+07	1.553e+07	2.74158e+07	2.82317e+07	2.73152e+07	2.76035e+07	2.27201e+07	2.40168e+07	2.51773e+07	3.8556e+07	2.70203e+07	1
Q13573	SNW domain-containing protein 1 OS=Homo sapiens OX=9606 GN=SNW1 PE=1 SV=1	0	42.463	19	10	211	10	536	61.5	9.52	83.7	10	0	1.289	0.627	0.927467	0.0429989	21.22	20.7	85.9	65	149.2	11.36	5.41	15.01	17131947	1.95314e+07	1.85514e+07	1.25168e+07	1.33013e+07	1.47532e+07	2.30473e+07	1.37295e+07	1.85087e+07	17131947	2.01917e+07	2.14603e+07	1.45803e+07	1.52815e+07	1.62371e+07	3.50852e+07	4.28536e+07	3.22028e+07	1
Q9H4L5	Oxysterol-binding protein-related protein 3 OS=Homo sapiens OX=9606 GN=OSBPL3 PE=1 SV=1	0	42.441	15	12	120	11	887	101.2	6.87	32.53	12	1	0.67	0.692	0.480285	0.412878	32.04	34.6	77.5	92.9	129.6	14.16	6.52	16.6	3.10209e+06	2.75598e+06	3.23011e+06	3.18275e+06	3.60963e+06	3.37631e+06	2.52029e+06	1.67166e+06	2.97951e+06	3.10209e+06	2.84915e+06	3.7366e+06	3.70747e+06	4.14698e+06	3.71591e+06	3.83666e+06	5.21773e+06	5.18396e+06	1
Q8NHW5	Putative ribosomal protein uL10-like OS=Homo sapiens OX=9606 GN=RPLP0P6 PE=5 SV=1	0	42.384	27	7	537	7	317	34.3	5.55	225.94	7	0	1.407	1.001	0.847525	0.994006	22.05	32.83	112.6	83.4	104	2.3	5.62	4.14	2.57734e+08	2.61017e+08	2.28852e+08	1.6821e+08	1.58753e+08	1.85317e+08	1.7037e+08	7.679e+07	1.40508e+08	2.57734e+08	2.69841e+08	2.64736e+08	1.95941e+08	1.82386e+08	2.03957e+08	2.59356e+08	2.39683e+08	2.44466e+08	1
P36507	Dual specificity mitogen-activated protein kinase kinase 2 OS=Homo sapiens OX=9606 GN=MAP2K2 PE=1 SV=1	0	42.332	26	10	138	5	400	44.4	6.55	58.4	10	0	0.931	0.79	0.932471	0.677463	21.99	18.35	93.1	96.8	110.1	12.65	13.27	10.04	4.82342e+06	6.01642e+06	4.76926e+06	4.92298e+06	4.65204e+06	6.24509e+06	4.28347e+06	2.42378e+06	3.61207e+06	4.82342e+06	6.21982e+06	5.51708e+06	5.7346e+06	5.34457e+06	6.87325e+06	6.52079e+06	7.56529e+06	6.28453e+06	1
Q9Y2W2	WW domain-binding protein 11 OS=Homo sapiens OX=9606 GN=WBP11 PE=1 SV=1	0	42.319	15	11	143	11	641	70	8.38	51.72	11	0	3.272	0.793	0.00130088	0.719871	28.35	25.11	117.8	27.5	154.8	8.66	21.11	5.95	6.85215e+06	6.65924e+06	6.87471e+06	1.12809e+06	1.74499e+06	1.46052e+06	5.74122e+06	3.14068e+06	5.20011e+06	6.85215e+06	6.88437e+06	7.95267e+06	1.31407e+06	2.00476e+06	1.60743e+06	8.73994e+06	9.80294e+06	9.04752e+06	1
Q92973	Transportin-1 OS=Homo sapiens OX=9606 GN=TNPO1 PE=1 SV=2	0	42.269	13	11	172	11	898	102.3	4.98	86.8	11	0	0.995	1.03	0.965964	0.960977	21.39	24.21	98.3	102.5	99.2	11.23	9.46	3.78	1.67738e+07	1.9214e+07	1.39867e+07	1.50108e+07	1.47666e+07	1.83315e+07	1.04225e+07	5.43669e+06	9.73238e+06	1.67738e+07	1.98636e+07	1.61798e+07	1.74855e+07	1.69648e+07	2.01754e+07	1.58664e+07	1.69694e+07	1.69331e+07	1
P78344	Eukaryotic translation initiation factor 4 gamma 2 OS=Homo sapiens OX=9606 GN=EIF4G2 PE=1 SV=1	0	42.253	14	12	109	12	907	102.3	7.14	45.37	12	0	1.663	0.891	0.573846	0.929654	28.39	30.06	118.5	44.9	136.6	19.76	29.39	19.34	1.3019e+07	1.54406e+07	1.6757e+07	4.51926e+06	5.25719e+06	8.2118e+06	1.04145e+07	7.41454e+06	1.05727e+07	1.3019e+07	1.59626e+07	1.93845e+07	5.26431e+06	6.0398e+06	9.03778e+06	1.58542e+07	2.31429e+07	1.83952e+07	1
P26641	Elongation factor 1-gamma OS=Homo sapiens OX=9606 GN=EEF1G PE=1 SV=3	0	42.23	21	9	242	9	437	50.1	6.67	122.98	9	0	1.221	0.915	0.944469	0.947573	30.31	26.52	107.5	82.2	110.3	15.42	4.76	14.87	4.80789e+07	6.10875e+07	5.54866e+07	4.14842e+07	4.50009e+07	4.28989e+07	4.25865e+07	2.65376e+07	3.70276e+07	4.80789e+07	6.31527e+07	6.4187e+07	4.83234e+07	5.17e+07	4.72139e+07	6.48299e+07	8.28315e+07	6.44232e+07	1
A0A8I5KQE6	Small ribosomal subunit protein uS2B OS=Homo sapiens OX=9606 GN=RPSA2 PE=3 SV=1	0	42.217	29	7	268	7	295	32.9	4.87	140.12	7	0	1.543	1.101	0.703227	0.908189	28.09	24.06	121.5	79.2	99.3	19.83	6.55	11.94	8.63124e+07	122462974	1.05873e+08	6.85481e+07	6.19608e+07	72671254	6.57907e+07	3.8862e+07	5.65853e+07	8.63124e+07	1.26603e+08	1.22474e+08	7.98492e+07	7.11846e+07	7.99808e+07	1.00154e+08	1.21299e+08	9.84511e+07	1
O00429	Dynamin-1-like protein OS=Homo sapiens OX=9606 GN=DNM1L PE=1 SV=2	0	42.176	16	10	149	10	736	81.8	6.81	68.3	10	0	0.88	1.07	0.905797	0.922241	24.94	23.64	97.5	111.7	90.8	16.57	15.4	11.01	1.09413e+07	1.44886e+07	1.03678e+07	1.02709e+07	1.19639e+07	1.47654e+07	7.34111e+06	3.29906e+06	7.34265e+06	1.09413e+07	1.49784e+07	1.19934e+07	1.19642e+07	1.37449e+07	1.62505e+07	1.11755e+07	1.02973e+07	1.27753e+07	1
Q9H8H2	Probable ATP-dependent RNA helicase DDX31 OS=Homo sapiens OX=9606 GN=DDX31 PE=1 SV=2	0	42.128	16	11	135	11	851	94	9.99	41.89	11	0	1.106	1.199	0.992122	0.658048	24.22	22.15	108.6	96	95.4	8.41	4.65	8.39	7.91073e+06	7.72254e+06	7.92062e+06	6.02062e+06	6.62971e+06	6.41286e+06	4.93484e+06	2.24614e+06	3.64896e+06	7.91073e+06	7.98361e+06	9.16258e+06	7.01319e+06	7.61665e+06	7.05789e+06	7.51237e+06	7.01083e+06	6.34872e+06	1
Q99459	Cell division cycle 5-like protein OS=Homo sapiens OX=9606 GN=CDC5L PE=1 SV=2	0	42.112	22	12	87	12	802	92.2	8.18	37.72	12	0	1.169	1.18	0.965964	0.707876	17.33	33.75	102	88.7	109.4	2.78	25.93	1.38	6.45843e+06	6.59956e+06	5.69823e+06	4.92027e+06	5968332	3.64198e+06	4.66042e+06	2.26579e+06	3.97539e+06	6.45843e+06	6.82267e+06	6.59171e+06	5.73144e+06	6.85681e+06	4.00831e+06	7.09462e+06	7.07216e+06	6.91667e+06	1
O60488	Long-chain-fatty-acid--CoA ligase 4 OS=Homo sapiens OX=9606 GN=ACSL4 PE=1 SV=2	0	42.029	15	9	175	8	711	79.1	8.38	73.29	9	0	0.776	1.075	0.743537	0.908189	20.75	22.49	112.9	125.9	61.2	33.72	6.68	40.56	4.05067e+06	7.7511e+06	6.76512e+06	7.48759e+06	7.57918e+06	8.8708e+06	2.64464e+06	1.35912e+06	4.55212e+06	4.05067e+06	8.01314e+06	7.8259e+06	8.72201e+06	8.70746e+06	9.76307e+06	4.02597e+06	4.2422e+06	7.9201e+06	1
O15042	U2 snRNP-associated SURP motif-containing protein OS=Homo sapiens OX=9606 GN=U2SURP PE=1 SV=2	0	42.01	11	9	154	9	1029	118.2	8.47	66.02	9	0	1.128	1.23	0.978238	0.605657	23.94	31.96	125.1	97.2	77.7	7.95	22.73	23.52	9.06196e+06	9.21657e+06	7034384	5.68954e+06	8.62565e+06	6.40018e+06	3.13243e+06	2.40657e+06	3.23279e+06	9.06196e+06	9.52815e+06	8.13738e+06	6.62753e+06	9.90971e+06	7.04394e+06	4.76854e+06	7.51158e+06	5.62463e+06	1
Q92538	Golgi-specific brefeldin A-resistance guanine nucleotide exchange factor 1 OS=Homo sapiens OX=9606 GN=GBF1 PE=1 SV=3	0	41.938	9	13	92	13	1860	206.4	5.73	25.11	13	0	1.013	0.88	0.970641	0.948143	20.61	17.56	93.9	97	109.1	3.69	18.15	6.42	6.7149e+06	6.4434e+06	6.15715e+06	6.0854e+06	4.36927e+06	6297688	5.12191e+06	2.51972e+06	4019201	6.7149e+06	6.66123e+06	7.1226e+06	7.08866e+06	5.01971e+06	6.93114e+06	7.79716e+06	7.86477e+06	6.99289e+06	1
Q9H4H8	Protein FAM83D OS=Homo sapiens OX=9606 GN=FAM83D PE=1 SV=3	0	41.909	29	11	141	11	585	64.4	6.54	53.97	11	0	1.414	0.608	0.845067	0.0510594	29.52	27.73	94.3	65.8	139.9	15.78	21.72	21.85	7.14515e+06	8.10895e+06	8479433	3.61712e+06	5.09413e+06	5.96049e+06	7.13716e+06	5.28168e+06	7.15346e+06	7.14515e+06	8.38308e+06	9.80902e+06	4.21345e+06	5.85246e+06	6.56003e+06	1.0865e+07	1.64856e+07	1.24461e+07	1
Q9H9C1	Spermatogenesis-defective protein 39 homolog OS=Homo sapiens OX=9606 GN=VIPAS39 PE=1 SV=1	0	41.906	34	12	97	12	493	57	7.4	27.92	12	0	1.012	0.863	0.96956	0.954745	13.97	23.3	108.2	69.3	122.5	6.72	24.24	20.99	2.44238e+06	2.62055e+06	2.07131e+06	1.26182e+06	1.96047e+06	1.42134e+06	1.63128e+06	1.17821e+06	1.58879e+06	2.44238e+06	2.70915e+06	2.39609e+06	1.46984e+06	2.25232e+06	1.56431e+06	2.48331e+06	3.67754e+06	2.76429e+06	1
O00622	CCN family member 1 OS=Homo sapiens OX=9606 GN=CCN1 PE=1 SV=1	0	41.796	31	10	238	10	381	42	8.21	125.88	10	0	1.239	0.743	0.934426	0.357986	23.77	33.9	91.3	72.9	135.8	14.93	6.23	21.45	3.39684e+07	3.22626e+07	3.73173e+07	2.3268e+07	2.33242e+07	2.72173e+07	3.31946e+07	2.10185e+07	2.48658e+07	3.39684e+07	3.33533e+07	4.31687e+07	2.7104e+07	2.67964e+07	2.99549e+07	5.05326e+07	6.56048e+07	4.32633e+07	1
P23528	Cofilin-1 OS=Homo sapiens OX=9606 GN=CFL1 PE=1 SV=3	0	41.795	54	7	99	5	166	18.5	8.09	39.27	7	2	0.815	0.885	0.832396	0.906355	31.99	34.42	101.5	115.5	82.9	34.64	14.99	20.17	2.5499e+07	5.16365e+07	3.85641e+07	40812835	4.41912e+07	5.70786e+07	2.39365e+07	1.6207e+07	2.07353e+07	2.5499e+07	5.33822e+07	4.4611e+07	4.75414e+07	5.07697e+07	6.28199e+07	3.64388e+07	5.05867e+07	3.60768e+07	1
Q9Y4W2	Ribosomal biogenesis protein LAS1L OS=Homo sapiens OX=9606 GN=LAS1L PE=1 SV=2	0	41.763	21	11	138	11	734	83	4.73	60.31	11	0	0.822	0.945	0.84406	0.992464	21.41	20.89	97.2	111.5	91.3	16.88	14.86	10.99	6.5666e+06	8.87629e+06	7.42231e+06	7.44973e+06	8.56978e+06	1.05798e+07	6.20162e+06	2.58311e+06	4.419e+06	6.5666e+06	9.17637e+06	8.58614e+06	8.67792e+06	9.84552e+06	1.16439e+07	9.44081e+06	8.06263e+06	7.68848e+06	1
Q6NZI2	Caveolae-associated protein 1 OS=Homo sapiens OX=9606 GN=CAVIN1 PE=1 SV=1	0	41.724	26	10	172	10	390	43.5	5.6	72.16	10	0	0.959	0.833	0.952905	0.771209	28.75	21.73	93.3	98.3	108.4	10.08	4.81	10.17	4.07629e+07	38023188	4.09271e+07	3.80274e+07	3.73497e+07	3.65947e+07	3.10989e+07	1.58675e+07	2.33289e+07	4.07629e+07	3.93086e+07	4.73446e+07	4.42967e+07	4.29098e+07	4.02756e+07	4.73422e+07	4.95269e+07	4.05893e+07	1
P53985	Monocarboxylate transporter 1 OS=Homo sapiens OX=9606 GN=SLC16A1 PE=1 SV=3	0	41.647	16	6	87	6	500	53.9	8.66	38.38	6	0	0.995	0.875	0.965964	0.892638	27.56	18.25	100.3	98.4	101.3	1.41	9.47	10.42	2.84232e+07	2.7707e+07	2.52487e+07	24112121	2.56752e+07	22237148	1.67603e+07	1.00792e+07	1.66178e+07	2.84232e+07	2.86437e+07	2.92077e+07	2.80873e+07	2.94973e+07	2.44739e+07	2.55145e+07	3.14601e+07	2.89127e+07	1
Q92621	Nuclear pore complex protein Nup205 OS=Homo sapiens OX=9606 GN=NUP205 PE=1 SV=3	0	41.645	7	11	56	11	2012	227.8	6.19	17.13	11	0	1.108	0.931	0.992122	0.995444	29.63	11.9	97.9	91.6	110.5	13.85	22.49	14.89	2.50918e+06	1.9957e+06	2.35424e+06	1626268	2.5869e+06	2.13539e+06	1.73314e+06	907826	2.00427e+06	2.50918e+06	2.06317e+06	2.72339e+06	1.89438e+06	2.972e+06	2.35017e+06	2.63837e+06	2.83358e+06	3.48717e+06	1
P30876	DNA-directed RNA polymerase II subunit RPB2 OS=Homo sapiens OX=9606 GN=POLR2B PE=1 SV=1	0	41.598	10	9	110	9	1174	133.8	6.87	33.31	9	0	1.071	0.975	0.997621	0.995667	17.06	28.25	108.7	85.4	105.9	8.83	9.27	5.51	11487985	13025028	1.16012e+07	9.90443e+06	9.1845e+06	8.70489e+06	8.10185e+06	4.41234e+06	7.51953e+06	11487985	1.34654e+07	1.34203e+07	1.15373e+07	1.05518e+07	9.58046e+06	1.23336e+07	1.37722e+07	1.3083e+07	1
Q5VYS8	Terminal uridylyltransferase 7 OS=Homo sapiens OX=9606 GN=TUT7 PE=1 SV=1	0	41.506	10	12	92	12	1495	171.1	6.83	25.87	12	0	0.842	0.593	0.886786	0.384738	59.77	52.91	172.8	52.2	75	57.53	37.35	8.05	485525	1.82564e+06	1.69245e+06	769695	379611	517768	571498	262275	425662	485525	1.88736e+06	1.95782e+06	896590	436121	569847	869998	818634	740597	1
Q99569	Plakophilin-4 OS=Homo sapiens OX=9606 GN=PKP4 PE=1 SV=2	0	41.367	11	11	140	11	1192	131.8	8.94	43.6	11	0	1.462	0.781	0.797213	0.830209	19.19	23.94	90.5	67.9	141.7	43.44	54.58	22.54	2.32709e+06	2.53681e+06	4.27234e+06	2.11641e+06	581353	1.78808e+06	2697893	1.38282e+06	1.59008e+06	2.32709e+06	2.62257e+06	4.94225e+06	2.46532e+06	667896	1.96793e+06	4.10704e+06	4.31618e+06	2.76654e+06	1
Q9NR31	GTP-binding protein SAR1a OS=Homo sapiens OX=9606 GN=SAR1A PE=1 SV=1	0	41.359	32	10	364	8	198	22.4	6.68	130.48	10	2	0.99	0.992	0.965964	0.999235	23.74	14.36	101.1	102.3	96.6	10.45	12.19	3.14	5.67281e+07	6.68181e+07	5.15271e+07	4.1666e+07	5.25286e+07	5.50372e+07	3.74356e+07	1.90721e+07	3.22105e+07	5.67281e+07	6.9077e+07	5.96066e+07	4.85352e+07	6.03482e+07	6.05731e+07	5.69887e+07	5.95295e+07	5.6042e+07	1
P50281	Matrix metalloproteinase-14 OS=Homo sapiens OX=9606 GN=MMP14 PE=1 SV=3	0	41.353	16	11	270	11	582	65.9	7.77	137.41	11	0	0.501	0.986	0.0716636	0.997581	21.51	29.84	75.5	147.8	76.7	7.63	6.06	5.1	3.74001e+07	3.32442e+07	2.7782e+07	5.57817e+07	58545035	66345131	2.36257e+07	1.04206e+07	2.0047e+07	3.74001e+07	3.43681e+07	3.21382e+07	6.49781e+07	6.72604e+07	7.30184e+07	3.59657e+07	3.25255e+07	3.48791e+07	1
Q9C0D5	Protein TANC1 OS=Homo sapiens OX=9606 GN=TANC1 PE=1 SV=3	0	41.269	9	12	73	12	1861	202.1	8.32	15.95	12	0	1.11	0.556	0.9773	0.107444	12.38	45.33	93.8	31.9	174.3	29.91		14.95	1.46685e+06	1.14914e+06	1.82825e+06		433581		1.58753e+06	872747	1.86414e+06	1.46685e+06	1.18799e+06	2.11492e+06		498126		2.41672e+06	2.72409e+06	3.24336e+06	1
Q9BZE4	GTP-binding protein 4 OS=Homo sapiens OX=9606 GN=GTPBP4 PE=1 SV=3	0	41.241	17	10	206	10	634	73.9	9.5	93.84	10	0	1.531	0.923	0.714477	0.969162	32.91	21.26	123.6	64.2	112.2	15.76	31.02	12.08	1.56752e+07	1.51768e+07	1.01657e+07	9.36725e+06	7.09047e+06	5.25224e+06	9.34566e+06	4.6077e+06	6.61504e+06	1.56752e+07	1.56898e+07	1.17596e+07	1.09116e+07	8.14599e+06	5.78053e+06	1.4227e+07	1.43819e+07	1.15093e+07	1
P78347	General transcription factor II-I OS=Homo sapiens OX=9606 GN=GTF2I PE=1 SV=2	0	41.211	12	11	107	11	998	112.3	6.39	31.74	11	0	1.03	0.806	0.9773	0.827807	37.59	26.05	90.5	94.7	114.8	9.1	13.12	20.2	5.61476e+06	5983420	5.82624e+06	6.45377e+06	5.63663e+06	5.27e+06	5.15828e+06	3.49638e+06	4.4728e+06	5.61476e+06	6.1857e+06	6.73981e+06	7.51776e+06	6.47573e+06	5.80008e+06	7.85252e+06	1.09132e+07	7.7821e+06	1
Q9UKD2	mRNA turnover protein 4 homolog OS=Homo sapiens OX=9606 GN=MRTO4 PE=1 SV=2	0	41.186	36	9	208	9	239	27.5	8.29	117.25	9	0	1.342	1.064	0.890951	0.954745	14.65	25.41	108.6	82.3	109.1	0.81	3.72	5.49	4.96573e+07	48816805	4.33474e+07	3.26214e+07	3.22579e+07	3.62177e+07	3.30845e+07	1.49272e+07	2.98171e+07	4.96573e+07	5.04671e+07	5.01443e+07	3.79994e+07	3.706e+07	3.98607e+07	5.0365e+07	4.65921e+07	5.18779e+07	1
Q9H361	Polyadenylate-binding protein 3 OS=Homo sapiens OX=9606 GN=PABPC3 PE=1 SV=2	0	41.172	12	8	296	6	631	70	9.67	120.87	8	0	2.34	1.118	0.0677841	0.893157	17.22	23.78	134.9	57	108.1	12.97	0.69	10.33	1.19988e+08	1.38652e+08	134539917	5.19713e+07	5.22052e+07	5.52291e+07	7.54234e+07	4.37361e+07	6.58531e+07	1.19988e+08	1.43339e+08	1.55636e+08	6.05394e+07	5.99768e+07	6.07843e+07	1.14818e+08	1.36513e+08	1.14576e+08	1
Q5JWF2	Guanine nucleotide-binding protein G(s) subunit alpha isoforms XLas OS=Homo sapiens OX=9606 GN=GNAS PE=1 SV=2	0	41.15	11	10	289	10	1037	111	5.03	151.93	10	0	1.009	1.217	0.967525	0.663227	21.38	20.53	114.7	108.3	77	12.82	17.75	34.61	4.66718e+07	5.04838e+07	3.48392e+07	3.781e+07	4.42346e+07	3.21998e+07	2.05751e+07	5.2681e+06	1.94834e+07	4.66718e+07	5.21905e+07	4.03021e+07	4.40435e+07	5.08196e+07	3.54386e+07	3.13217e+07	1.64432e+07	3.38986e+07	1
P63092	Guanine nucleotide-binding protein G(s) subunit alpha isoforms short OS=Homo sapiens OX=9606 GN=GNAS PE=1 SV=1	0	41.15	29	10	289	10	394	45.6	5.82	151.93	10	0	1.009	1.217	0.967525	0.663227	21.38	20.53	114.7	108.3	77	12.82	17.75	34.61	4.66718e+07	5.04838e+07	3.48392e+07	3.781e+07	4.42346e+07	3.21998e+07	2.05751e+07	5.2681e+06	1.94834e+07	4.66718e+07	5.21905e+07	4.03021e+07	4.40435e+07	5.08196e+07	3.54386e+07	3.13217e+07	1.64432e+07	3.38986e+07	1
Q9NSI2	Ribosome biogenesis protein SLX9 homolog OS=Homo sapiens OX=9606 GN=SLX9 PE=1 SV=2	0	41.068	43	10	179	10	230	25.4	11.08	76.55	10	0	1.593	0.886	0.655018	0.942999	20.31	20.31	114.8	75.4	109.8	10.13	7.65	13.34	8228544	9.75629e+06	8.03554e+06	5.24246e+06	4.86236e+06	5.91731e+06	7.29506e+06	2847850	5.10094e+06	8228544	1.00861e+07	9.29552e+06	6.10675e+06	5.5862e+06	6.5125e+06	1.11054e+07	8.88894e+06	8.87498e+06	1
Q92552	Small ribosomal subunit protein mS27 OS=Homo sapiens OX=9606 GN=MRPS27 PE=1 SV=3	0	40.99	33	11	151	11	414	47.6	6.18	70.94	11	0	1.457	1.006	0.798606	0.980351	22.74	19.31	122.4	65.6	112	10.5	14.15	9.23	1.78678e+07	1.50558e+07	1.66025e+07	7.99407e+06	1.04068e+07	8.70437e+06	1.07406e+07	4.67137e+06	1.00832e+07	1.78678e+07	1.55648e+07	1.92058e+07	9.31199e+06	1.1956e+07	9.57989e+06	1.63505e+07	1.45807e+07	1.75434e+07	1
Q15717	ELAV-like protein 1 OS=Homo sapiens OX=9606 GN=ELAVL1 PE=1 SV=2	0	40.978	33	8	258	8	326	36.1	9.17	111.28	8	0	1.396	0.809	0.859758	0.695347	19.38	22.88	110.1	68.9	121	17.65	7.74	26.65	2.01683e+07	2.20458e+07	2.45404e+07	1.11998e+07	1.24085e+07	1.38445e+07	1.64426e+07	1.1864e+07	1.32533e+07	2.01683e+07	2.27911e+07	2.83884e+07	1.30462e+07	1.42557e+07	1.52371e+07	2.50308e+07	3.7031e+07	2.3059e+07	1
Q8N9T8	Protein KRI1 homolog OS=Homo sapiens OX=9606 GN=KRI1 PE=1 SV=3	0	40.974	16	9	108	9	703	82.5	5.14	55.58	9	0	1.211	0.759	0.954467	0.520476	28.48	43.65	89.6	77	133.4	26.8	20.13	32.31	9.20103e+06	9.61293e+06	1.27752e+07	7.3279e+06	5.6826e+06	8.94777e+06	9.3198e+06	7.83033e+06	8.50147e+06	9.20103e+06	9.93791e+06	1.47784e+07	8.536e+06	6.52854e+06	9.84777e+06	1.41876e+07	2.44407e+07	1.47914e+07	1
P61158	Actin-related protein 3 OS=Homo sapiens OX=9606 GN=ACTR3 PE=1 SV=3	0	40.968	28	10	133	10	418	47.3	5.88	48.61	10	0	0.835	1.156	0.860762	0.771788	37.8	30.18	121.3	128.2	50.5	24.25	3.57	25.25	8.26349e+06	1.31403e+07	1.04281e+07	1.0905e+07	1.11018e+07	1.22936e+07	3.29739e+06	1.54131e+06	4.26717e+06	8.26349e+06	1.35846e+07	1.20633e+07	1.27028e+07	1.27545e+07	1.35301e+07	5.01965e+06	4.81087e+06	7.42433e+06	1
Q00688	Peptidyl-prolyl cis-trans isomerase FKBP3 OS=Homo sapiens OX=9606 GN=FKBP3 PE=1 SV=1	0	40.955	47	9	75	9	224	25.2	9.28	33.03	9	0	1.382	1.39	0.862585	0.156925	64.2	60.32	141.3	67.3	91.4	84.77	59.04	45.22	4.8851e+06	2.12845e+07	5.64788e+06	1.55103e+06	2.70753e+06	5.45847e+06	2.77383e+06	571553	2.82833e+06	4.8851e+06	2.2004e+07	6.53347e+06	1.80674e+06	3.11059e+06	6.00751e+06	4.22263e+06	1.78398e+06	4.92092e+06	1
O94905	Erlin-2 OS=Homo sapiens OX=9606 GN=ERLIN2 PE=1 SV=1	0	40.949	33	11	116	8	339	37.8	5.62	48.83	11	3	0.471	0.95	0.0393303	0.986757	12.5	32.64	68.5	154.3	77.2	6.47	5.46	8.7	1.08489e+07	1.19284e+07	1.02359e+07	2.2889e+07	2.29415e+07	2.64243e+07	8.75975e+06	4.34389e+06	6.625e+06	1.08489e+07	1.23317e+07	1.1841e+07	2.66625e+07	2.63567e+07	2.90822e+07	1.33351e+07	1.35585e+07	1.15266e+07	1
Q05639	Elongation factor 1-alpha 2 OS=Homo sapiens OX=9606 GN=EEF1A2 PE=1 SV=1	0	40.862	25	8	428	2	463	50.4	9.03	203.4	8	0	1.537	1.018	0.692839	0.963043	18.38	21.43	113.4	75.1	111.5	20.55	13.51	10.26	1.27767e+06	1.05721e+06	1.41129e+06	659896	810467		744642	445983	721496	1.27767e+06	1.09295e+06	1.63258e+06	768689	931117		1.13358e+06	1.39204e+06	1.25531e+06	1
Q9UN86	Ras GTPase-activating protein-binding protein 2 OS=Homo sapiens OX=9606 GN=G3BP2 PE=1 SV=2	0	40.813	21	8	145	7	482	54.1	5.55	58.01	8	0	3.256	1.037	0.00139623	0.969162	26.95	28.2	132.3	28.7	139	16.28	42.45	7.07	2.43035e+07	2.68379e+07	2.89519e+07	9.16797e+06	4.27451e+06	5.4776e+06	1.91446e+07	9.96822e+06	1.55197e+07	2.43035e+07	2.77452e+07	3.34916e+07	1.06794e+07	4.91084e+06	6.02856e+06	2.9144e+07	3.11136e+07	2.70023e+07	1
Q86X29	Lipolysis-stimulated lipoprotein receptor OS=Homo sapiens OX=9606 GN=LSR PE=1 SV=4	0	40.792	18	9	101	9	649	71.4	7.97	40.89	9	0	0.992	0.84	0.965964	0.856862	17.85	14.92	96.9	90.9	112.2	8.37	3.31	5.27	1.21326e+07	9.9542e+06	1.00351e+07	9.37387e+06	9.48451e+06	9.35287e+06	8.83008e+06	4.08215e+06	8137385	1.21326e+07	1.02907e+07	1.16087e+07	1.09193e+07	1.08964e+07	1.02936e+07	1.34421e+07	1.27415e+07	1.4158e+07	1
Q6P2H3	Centrosomal protein of 85 kDa OS=Homo sapiens OX=9606 GN=CEP85 PE=1 SV=1	0	40.755	14	11	145	11	762	85.6	6	55.6	11	0	1.563	0.629	0.687522	0.0948725	15.13	35.42	91.9	51.4	156.7	19.77	24.98	26.07	7.34593e+06	6.62549e+06	8.4744e+06	2.303e+06	3.57901e+06	4.03714e+06	8.23379e+06	5.59634e+06	6.10658e+06	7.34593e+06	6.84948e+06	9.80319e+06	2.68268e+06	4.1118e+06	4.44322e+06	1.25344e+07	1.74677e+07	1.06247e+07	1
Q14134	Tripartite motif-containing protein 29 OS=Homo sapiens OX=9606 GN=TRIM29 PE=1 SV=2	0	40.755	24	12	155	12	588	65.8	7.15	50.7	12	0	1.56	0.725	0.687522	0.406711	16.21	22.4	97.5	32	170.5	31.83	36.4	1.36	6.04481e+06	1.05832e+07	6.20222e+06	3.33819e+06	1.74589e+06	2.14191e+06	8.24077e+06	3.9462e+06	7.27055e+06	6.04481e+06	1.0941e+07	7.17473e+06	3.88853e+06	2.00579e+06	2.35735e+06	1.2545e+07	1.23172e+07	1.26498e+07	1
P83111	Serine beta-lactamase-like protein LACTB, mitochondrial OS=Homo sapiens OX=9606 GN=LACTB PE=1 SV=2	0	40.743	22	10	98	10	547	60.7	8.53	26.4	10	0	0.889	0.944	0.908111	0.999235	36.54	31.69	81.1	147	71.8	9.13	27.41	39.25	2.46612e+06	2.85078e+06	2.2717e+06	4.08911e+06	2.61777e+06	4.80048e+06	2.18712e+06	745372	843335	2.46612e+06	2.94716e+06	2.62791e+06	4.76326e+06	3.00746e+06	5.28334e+06	3.32948e+06	2.32652e+06	1.46729e+06	1
P23921	Ribonucleoside-diphosphate reductase large subunit OS=Homo sapiens OX=9606 GN=RRM1 PE=1 SV=1	0	40.72	15	9	113	9	792	90	7.15	48.7	9	0	0.906	0.843	0.930042	0.868331	22.64	40.44	93.4	110.3	96.2	10.82	15.2	10.23	7.62285e+06	9.12565e+06	7.73847e+06	6.93195e+06	9.33482e+06	9.60785e+06	6.0588e+06	3.43332e+06	5.09453e+06	7.62285e+06	9.43416e+06	8.95187e+06	8.07478e+06	1.07245e+07	1.05742e+07	9.22339e+06	1.07164e+07	8.86382e+06	1
Q9Y2A7	Nck-associated protein 1 OS=Homo sapiens OX=9606 GN=NCKAP1 PE=1 SV=1	0	40.713	10	10	167	10	1128	128.7	6.62	58.79	10	0	1.082	0.966	0.999358	0.997298	33.1	23.3	106.7	101.1	92.2	8.49	37.5	10.44	6.43839e+06	6.24142e+06	6.43336e+06	5.24819e+06	8.9858e+06	4.77744e+06	3.17459e+06	1.78763e+06	3.42022e+06	6.43839e+06	6.45242e+06	7.44212e+06	6.11343e+06	1.03235e+07	5.25798e+06	4.83272e+06	5.57971e+06	5.95074e+06	1
P49756	RNA-binding protein 25 OS=Homo sapiens OX=9606 GN=RBM25 PE=1 SV=3	0	40.68	16	10	94	10	843	100.1	6.32	37.82	10	0	0.847	1.001	0.87351	0.980177	20.43	18.14	90.2	110.9	98.9	15.54	6.54	27.78	8.62472e+06	7.77727e+06	9.28298e+06	9.09747e+06	8.97619e+06	1.05942e+07	4.6244e+06	3.9653e+06	5.42999e+06	8.62472e+06	8.04019e+06	1.07386e+07	1.05973e+07	1.03124e+07	1.16598e+07	7.03978e+06	1.23768e+07	9.44747e+06	1
Q641Q2	WASH complex subunit 2A OS=Homo sapiens OX=9606 GN=WASHC2A PE=1 SV=3	0	40.672	13	11	58	11	1341	147.1	4.81	10.12	11	0	1.008	0.893	0.967525	0.954745	37.39	71.03	85.9	92.2	122	8.11	30.39	35.85	5.18851e+06	4714355	3.81294e+06	6.8151e+06	3.95476e+06	4.75535e+06	6.7991e+06	2.21821e+06	2.9232e+06	5.18851e+06	4.87373e+06	4.41081e+06	7.93865e+06	4.54348e+06	5.23366e+06	1.03504e+07	6.92365e+06	5.08598e+06	1
Q9UL03	Integrator complex subunit 6 OS=Homo sapiens OX=9606 GN=INTS6 PE=1 SV=1	0	40.61	21	12	83	12	887	100.3	8.62	24.45	12	0	1.115	0.948	0.989758	0.997207	22.87	20.15	87	112.1	100.9	12.45	6.89	16.41	3.03085e+06	3.74655e+06	2.89462e+06	3.79612e+06	3.37348e+06	3.92135e+06	1.9589e+06	1.32043e+06	2.23195e+06	3.03085e+06	3.87321e+06	3.3485e+06	4.42196e+06	3.87568e+06	4.31577e+06	2.98206e+06	4.12145e+06	3.8833e+06	1
O00507	Probable ubiquitin carboxyl-terminal hydrolase FAF-Y OS=Homo sapiens OX=9606 GN=USP9Y PE=2 SV=2	0	40.588	5	11	142	1	2555	290.9	5.86	55.72	11	0																															1
Q92896	Golgi apparatus protein 1 OS=Homo sapiens OX=9606 GN=GLG1 PE=1 SV=2	0	40.559	10	10	178	10	1179	134.5	6.9	85.54	10	0	0.788	0.878	0.770057	0.947355	24.52	17.83	63.5	141.7	94.8	48.4	8.83	40.72	5.02008e+06	1.1855e+07	5.58674e+06	1.1672e+07	1.40539e+07	1.31086e+07	7.49683e+06	1.49787e+06	5.54443e+06	5.02008e+06	1.22558e+07	6.46275e+06	1.35963e+07	1.6146e+07	1.44272e+07	1.14125e+07	4.67528e+06	9.64659e+06	1
Q5H9R7	Serine/threonine-protein phosphatase 6 regulatory subunit 3 OS=Homo sapiens OX=9606 GN=PPP6R3 PE=1 SV=2	0	40.476	15	9	89	9	873	97.6	4.6	31.25	9	0	1.076	0.919	0.997621	0.992464	52.85	30.83	73.6	94	132.4	63.38	55.36	58.33	1.61615e+06	833777	2.78242e+06	1.77364e+06	3386376	1.1689e+06	615924	1.24729e+06	1.67242e+06	1.61615e+06	861965	3.2187e+06	2.06605e+06	3.89049e+06	1.28647e+06	937629	3.89315e+06	2.90979e+06	1
Q9H8Y5	tRNA endonuclease ANKZF1 OS=Homo sapiens OX=9606 GN=ANKZF1 PE=1 SV=1	0	40.459	18	10	116	10	726	80.9	8.41	46.71	10	0	0.878	1.048	0.905382	0.941583	17.62	19.79	93.8	116.4	89.9	0.63	2.95	9	6.04219e+06	5.80352e+06	5.25254e+06	6.43593e+06	6.5303e+06	6.47159e+06	3.8029e+06	1.62288e+06	3.47312e+06	6.04219e+06	5.99972e+06	6.07614e+06	7.49698e+06	7.50243e+06	7.12253e+06	5.7892e+06	5.06545e+06	6.04277e+06	1
Q8IX01	SURP and G-patch domain-containing protein 2 OS=Homo sapiens OX=9606 GN=SUGP2 PE=1 SV=2	0	40.424	13	10	70	10	1082	120.1	7.28	19.03	10	0	0.702	1.083	0.578881	0.903222	21.6	35.5	85.5	135.7	78.8	25.35	6.05	47.84	5162860	5.68507e+06	7.15698e+06	7.68535e+06	8772025	8.48123e+06	3.55886e+06	3.48666e+06	2.73937e+06	5162860	5.87726e+06	8.2792e+06	8.95238e+06	1.00779e+07	9.33431e+06	5.41769e+06	1.08829e+07	4.76614e+06	1
P40763	Signal transducer and activator of transcription 3 OS=Homo sapiens OX=9606 GN=STAT3 PE=1 SV=2	0	40.23	18	10	89	10	770	88	6.3	28.35	10	0	0.694	0.815	0.555447	0.860198	17.75	19.97	88	112	100	8.59	17.39	1.11	4.19507e+06	4812734	4.07868e+06	4.55743e+06	6.47542e+06	5451295	3.51981e+06	1.73561e+06	3.04503e+06	4.19507e+06	4.97544e+06	4.71822e+06	5.30878e+06	7.43938e+06	5.99961e+06	5.35825e+06	5.41732e+06	5.29796e+06	1
Q16630	Cleavage and polyadenylation specificity factor subunit 6 OS=Homo sapiens OX=9606 GN=CPSF6 PE=1 SV=2	0	40.176	20	9	149	9	551	59.2	7.15	61.2	9	0	1.312	1.1	0.907599	0.896705	19.2	21.92	112.4	87.4	100.1	4.26	3.28	21.41	2.0766e+07	2.18736e+07	1.88241e+07	1.42746e+07	1.54209e+07	1.53895e+07	1.07114e+07	7.95798e+06	1.11484e+07	2.0766e+07	2.26131e+07	2.17758e+07	1.66279e+07	1.77165e+07	1.69374e+07	1.63061e+07	2.48391e+07	1.93967e+07	1
Q96PY5	Formin-like protein 2 OS=Homo sapiens OX=9606 GN=FMNL2 PE=1 SV=3	0	40.157	12	12	56	9	1086	123.2	7.4	14.71	12	0	1.492	1.026	0.741219	0.958055	26.55	20.59	109.8	74.7	115.5	13.5	25.31	41.23	1.28465e+06	1.44309e+06	986533		912184	663111	1.46768e+06	323563	777173	1.28465e+06	1.49188e+06	1.14122e+06		1.04798e+06	729809	2.23427e+06	1.00993e+06	1.35218e+06	1
P62195	26S proteasome regulatory subunit 8 OS=Homo sapiens OX=9606 GN=PSMC5 PE=1 SV=1	0	40.017	28	9	155	9	406	45.6	7.55	49.25	9	0	1.252	0.811	0.932471	0.828613	25.1	26.21	131.3	56.9	111.8	38.11	52.01	25.96	8.00565e+06	8.91429e+06	3.50022e+06	2.89389e+06	3.02105e+06	7.10858e+06	4.47604e+06	3.08575e+06	3.40432e+06	8.00565e+06	9.21565e+06	4.04906e+06	3.37099e+06	3.47078e+06	7.8236e+06	6.81394e+06	9.6315e+06	5.92308e+06	1
P13674	Prolyl 4-hydroxylase subunit alpha-1 OS=Homo sapiens OX=9606 GN=P4HA1 PE=1 SV=2	0	39.997	21	8	125	8	534	61	6.01	45.76	8	0	0.562	1.006	0.176496	0.963043	22.3	11.88	94.3	146	59.7	16.61	11.56	10.06	5.00732e+06	6.77051e+06	5.16939e+06	7.94375e+06	9303463	7.7529e+06	2.48441e+06	1.27255e+06	1.87302e+06	5.00732e+06	6.99939e+06	5.97995e+06	9.25338e+06	1.06884e+07	8.53272e+06	3.78205e+06	3.97198e+06	3.25882e+06	1
P31327	Carbamoyl-phosphate synthase [ammonia], mitochondrial OS=Homo sapiens OX=9606 GN=CPS1 PE=1 SV=2	0	39.976	10	12	59	12	1500	164.8	6.74	16.53	12	0	0.633	100	0.457981	1.6177e-16	18.43		112.4	187.6		9.84	14.52		422899	355838		565016	447176	615640				422899	367868		658167	513745	677564				1
Q9BXS4	Transmembrane protein 59 OS=Homo sapiens OX=9606 GN=TMEM59 PE=1 SV=1	0	39.971	28	7	232	7	323	36.2	5.1	112.5	7	0	0.918	1.146	0.930685	0.849749	22.23	22.67	97.4	112.3	90.4	6.52	4.24	14.38	5.41074e+07	4.61079e+07	4.2956e+07	4.81336e+07	5.29373e+07	5.20667e+07	3.20563e+07	1.17814e+07	2.65038e+07	5.41074e+07	4.76667e+07	4.96916e+07	5.60691e+07	6.08178e+07	5.73038e+07	4.87996e+07	3.6773e+07	4.61131e+07	1
Q9Y4F5	Centrosomal protein of 170 kDa protein B OS=Homo sapiens OX=9606 GN=CEP170B PE=1 SV=4	0	39.915	10	13	71	13	1589	171.6	6.84	15.08	13	0	1.379	1.172	0.859758	0.82354	6.44	23.94	141.1	43.4	115.5	13.03	55.99	31.1	1.51394e+06	1.90365e+06	1.55318e+06	473830	269803	901838	1.53658e+06	435850	845419	1.51394e+06	1.96801e+06	1.79673e+06	551948	309967	992549	2.33915e+06	1.36041e+06	1.47092e+06	1
P18085	ADP-ribosylation factor 4 OS=Homo sapiens OX=9606 GN=ARF4 PE=1 SV=3	0	39.913	44	8	333	3	180	20.5	7.14	145.38	8	0	0.966	0.717	0.961928	0.255354	20.8	26.19	84.2	99.1	116.7	17.14	12.08	10.69	4.15434e+07	47527698	5.06263e+07	4.0985e+07	5.25538e+07	5.25408e+07	40353315	2.43715e+07	3.91428e+07	4.15434e+07	4.91345e+07	5.85645e+07	4.77419e+07	6.03772e+07	5.78256e+07	6.14304e+07	7.60704e+07	6.81034e+07	1
Q14166	Tubulin--tyrosine ligase-like protein 12 OS=Homo sapiens OX=9606 GN=TTLL12 PE=1 SV=2	0	39.85	22	9	123	9	644	74.4	5.53	36.76	9	0	1.244	1.125	0.932471	0.850254	16.27	32.39	120.9	82.6	96.5	8.05	15.11	8.13	8282588	9.12231e+06	8.34182e+06	5.53205e+06	6.8344e+06	5.34121e+06	4.75009e+06	2.41014e+06	4.84832e+06	8282588	9.43071e+06	9.64983e+06	6.44408e+06	7.8518e+06	5.87845e+06	7.23113e+06	7.52274e+06	8.43544e+06	1
Q9NUQ6	SPATS2-like protein OS=Homo sapiens OX=9606 GN=SPATS2L PE=1 SV=2	0	39.696	21	10	202	10	558	61.7	9.64	65.43	10	0	1.404	1.264	0.851935	0.44829	20.93	24.73	123.1	83.2	93.7	8.12	5.06	9.11	1.18677e+07	1.32078e+07	1.18959e+07	7.61901e+06	8.03083e+06	8.91107e+06	7.25554e+06	2.95055e+06	5.97275e+06	1.18677e+07	1.36543e+07	1.37612e+07	8.87511e+06	9.22634e+06	9.80738e+06	1.10452e+07	9.2095e+06	1.03918e+07	1
Q9H0H5	Rac GTPase-activating protein 1 OS=Homo sapiens OX=9606 GN=RACGAP1 PE=1 SV=1	0	39.676	23	11	128	11	632	71	8.88	61.93	11	0	2.938	1.009	0.0054539	0.983822	41.9	24.33	127.3	47.1	125.7	6.57	9.01	1.79	2.21652e+07	2.2185e+07	2.1723e+07	6.73187e+06	8.16345e+06	7.71245e+06	1.48239e+07	7.46874e+06	1.3016e+07	2.21652e+07	2.2935e+07	2.51292e+07	7.8417e+06	9.3787e+06	8.4882e+06	2.25666e+07	2.3312e+07	2.26462e+07	1
Q14155	Rho guanine nucleotide exchange factor 7 OS=Homo sapiens OX=9606 GN=ARHGEF7 PE=1 SV=2	0	39.571	13	10	149	10	803	90	7.09	62.43	10	0	1.048	0.612	0.990879	0.055231	23.61	32	74.4	78.3	147.3	33.42	9.34	30.36	7.86442e+06	9.53691e+06	1.28956e+07	9.19966e+06	7.793e+06	9.42797e+06	1.28176e+07	9.92455e+06	1.05648e+07	7.86442e+06	9.85932e+06	1.49176e+07	1.07163e+07	8.95311e+06	1.03763e+07	1.95124e+07	3.09773e+07	1.83813e+07	1
Q9H553	Alpha-1,3/1,6-mannosyltransferase ALG2 OS=Homo sapiens OX=9606 GN=ALG2 PE=1 SV=1	0	39.543	28	9	157	9	416	47.1	7.05	65.04	9	0	0.757	0.799	0.709937	0.729741	29.05	27.48	93.9	120.8	85.3	13.98	12.58	8.92	1.3014e+07	1.48721e+07	1.01036e+07	1.2828e+07	1.67076e+07	1.52174e+07	8.66434e+06	3.78726e+06	6.36432e+06	1.3014e+07	1.53749e+07	1.16879e+07	1.49429e+07	1.91948e+07	1.67481e+07	1.31898e+07	1.18211e+07	1.10731e+07	1
Q15262	Receptor-type tyrosine-protein phosphatase kappa OS=Homo sapiens OX=9606 GN=PTPRK PE=1 SV=2	0	39.456	11	10	93	10	1439	162	5.9	25.58	10	0	0.779	0.994	0.803778	0.972518	34.95	28.72	67.4	174.2	58.4	48.69	12.53	55.47	512975	337043	784055	1.13926e+06	1.06028e+06	1.4116e+06	292144	112300	546487	512975	348438	906996	1.32708e+06	1.21812e+06	1.55358e+06	444735	350519	950816	1
P01893	Putative HLA class I histocompatibility antigen, alpha chain H OS=Homo sapiens OX=9606 GN=HLA-H PE=5 SV=3	0	39.45	31	7	321	1	362	40.9	6.3	147.9	7	0	0.01	0.01	1.5566e-16	1.6177e-16				213.9	86.1			28.24						17452746	6.21672e+06	2.02254e+06							1.92082e+07	9.46379e+06	6.31291e+06		1
Q9NUU7	ATP-dependent RNA helicase DDX19A OS=Homo sapiens OX=9606 GN=DDX19A PE=1 SV=1	0	39.435	23	9	173	9	478	53.9	6.58	62.41	9	0	1.102	0.83	0.994469	0.797902	19.75	23.84	100.4	92.4	107.3	10.81	16	6.52	1.79033e+07	2.14792e+07	1.79932e+07	1.23958e+07	16673330	1.77341e+07	1.33098e+07	7.12876e+06	1.32308e+07	1.79033e+07	2.22053e+07	2.08146e+07	1.44394e+07	1.91554e+07	1.95178e+07	2.02617e+07	2.22509e+07	2.30198e+07	1
Q86VM9	Zinc finger CCCH domain-containing protein 18 OS=Homo sapiens OX=9606 GN=ZC3H18 PE=1 SV=2	0	39.406	13	9	84	9	953	106.3	8.32	31.86	9	0	1.222	1.043	0.94442	0.944903	20.66	21.04	110.1	96.8	93.1	2.59	4.47	3.13	6.01274e+06	6.12065e+06	5.29539e+06	4.62309e+06	4.37529e+06	4.97394e+06	3.40152e+06	1.70762e+06	2.87724e+06	6.01274e+06	6.32757e+06	6.12572e+06	5.38527e+06	5.02662e+06	5.47424e+06	5.17818e+06	5.32997e+06	5.00602e+06	1
P00558	Phosphoglycerate kinase 1 OS=Homo sapiens OX=9606 GN=PGK1 PE=1 SV=3	0	39.392	29	9	177	9	417	44.6	8.1	71.07	9	0	1.098	1.337	0.994877	0.257452	52.86	46.77	107.6	111.6	80.8	48.83	12.51	29.77	1.09442e+07	2.62365e+07	1.24014e+07	1.27761e+07	1.34169e+07	1.10109e+07	5.50825e+06	4.83383e+06	6.18956e+06	1.09442e+07	2.71235e+07	1.43459e+07	1.48824e+07	1.54142e+07	1.21184e+07	8.38528e+06	1.50878e+07	1.0769e+07	1
P98194	Calcium-transporting ATPase type 2C member 1 OS=Homo sapiens OX=9606 GN=ATP2C1 PE=1 SV=3	0	39.35	15	9	115	9	919	100.5	6.74	43.05	9	0	0.783	0.939	0.757596	0.986757	20.74	21.5	101.1	125.8	73.1	3.69	13.33	17.71	6.83896e+06	6.36019e+06	5.49227e+06	7.02008e+06	6.64853e+06	8.92651e+06	3.16175e+06	1.10626e+06	2.73134e+06	6.83896e+06	6.57521e+06	6.35347e+06	8.17743e+06	7.63826e+06	9.82437e+06	4.81317e+06	3.45295e+06	4.75218e+06	1
Q14568	Heat shock protein HSP 90-alpha A2 OS=Homo sapiens OX=9606 GN=HSP90AA2P PE=1 SV=2	0	39.343	23	8	567	2	343	39.3	4.65	253.45	8	0	0.984	0.949	0.965964	0.972518	24.11	42.53	101	89.9	109.1	20.47	4.59	6.43	1.95012e+08	2.86473e+08	2.25192e+08	1.99083e+08	1.94267e+08	2.22119e+08	1.66928e+08	9.19686e+07	1.61753e+08	1.95012e+08	2.96158e+08	2.60503e+08	2.31904e+08	2.23187e+08	2.44461e+08	2.54117e+08	2.8706e+08	2.81429e+08	1
Q8IXT5	RNA-binding protein 12B OS=Homo sapiens OX=9606 GN=RBM12B PE=1 SV=2	0	39.338	13	11	139	11	1001	118	6.81	52.05	11	0	1.284	0.781	0.930042	0.71319	20.14	46.22	111.5	85.8	102.7	15.21	7.17	38.96	5.02851e+06	4.35248e+06	5.23259e+06	3.29849e+06	3.36744e+06	3.95667e+06	3.0111e+06	2.76214e+06	2.66315e+06	5.02851e+06	4.49963e+06	6.05307e+06	3.84229e+06	3.86873e+06	4.35465e+06	4.58384e+06	8.62143e+06	4.63354e+06	1
Q01970	1-phosphatidylinositol 4,5-bisphosphate phosphodiesterase beta-3 OS=Homo sapiens OX=9606 GN=PLCB3 PE=1 SV=2	0	39.314	12	11	66	11	1234	138.7	5.9	18.4	11	0	1.011	1.093	0.971128	0.908189	25.39	41.12	152.6	88.8	58.6	31.57	35.32	46.45	1.53482e+06	2.88849e+06	2.17494e+06	636180	1340484	1.32994e+06	1.29966e+06	309623	528391	1.53482e+06	2.98614e+06	2.51597e+06	741063	1.54004e+06	1.46371e+06	1.97849e+06	966421	919331	1
P62937	Peptidyl-prolyl cis-trans isomerase A OS=Homo sapiens OX=9606 GN=PPIA PE=1 SV=2	0	39.289	62	8	196	8	165	18	7.81	68.54	8	0	0.981	1.086	0.965964	0.926169	26.36	41.65	101.5	114.7	83.8	14.82	9.56	9.17	34458834	4.40734e+07	3.21376e+07	3.08799e+07	3.75527e+07	38183776	1.99434e+07	9.83072e+06	2.04807e+07	34458834	4.55633e+07	3.71768e+07	3.59709e+07	4.3143e+07	4.20245e+07	3.03601e+07	3.06845e+07	3.56338e+07	1
P49674	Casein kinase I isoform epsilon OS=Homo sapiens OX=9606 GN=CSNK1E PE=1 SV=1	0	39.271	25	9	207	3	416	47.3	9.66	84.57	9	4	0.949	0.997	0.942678	0.980027	25.53	38.87	96.1	108.8	95.1	19.35	9.28	27.8	5.99921e+06	8.37082e+06	5.78538e+06	5.9318e+06	7.24193e+06	6.88063e+06	5.79972e+06	1.61698e+06	3.80721e+06	5.99921e+06	8.65381e+06	6.69253e+06	6.90974e+06	8.32e+06	7.57271e+06	8.82898e+06	5.04706e+06	6.62404e+06	1
O15084	Serine/threonine-protein phosphatase 6 regulatory ankyrin repeat subunit A OS=Homo sapiens OX=9606 GN=ANKRD28 PE=1 SV=5	0	39.221	12	9	89	8	1053	112.9	6.25	25.39	9	1	1.19	1.195	0.965964	0.682055	22.09	27.42	105.8	98.1	96.2	13.88	10.5	25.37	9.57208e+06	1.00381e+07	1.07864e+07	6.89998e+06	8.50409e+06	8.74228e+06	5.0297e+06	4.04231e+06	5.4253e+06	9.57208e+06	1.03775e+07	1.24777e+07	8.03753e+06	9.77005e+06	9.62162e+06	7.65677e+06	1.26172e+07	9.43933e+06	1
O60264	SWI/SNF-related matrix-associated actin-dependent regulator of chromatin subfamily A member 5 OS=Homo sapiens OX=9606 GN=SMARCA5 PE=1 SV=1	0	39.207	11	11	66	11	1052	121.8	8.09	21.78	11	0	1.302	1.004	0.912092	0.992464	50.12	30.03	86.7	120.6	92.7	16.83	9.33	26.39	5.85669e+08	4.82096e+08	6.03261e+08	5.92723e+08	7.10621e+08	7.40105e+08	4.24784e+08	1.23214e+08	3.60062e+08	5.85669e+08	4.98394e+08	6.97853e+08	6.90441e+08	8.16408e+08	8.14548e+08	6.46654e+08	3.84586e+08	6.26461e+08	1
Q8IXB1	DnaJ homolog subfamily C member 10 OS=Homo sapiens OX=9606 GN=DNAJC10 PE=1 SV=2	0	39.2	21	11	87	11	793	91	7.18	27.06	11	0	1.293	0.997	0.923473	0.96837	17.31	7.74	158.1	80.1	61.9	13.87	42.12	49.25	3.27344e+06	3.77163e+06	3.74414e+06		1.26405e+06	2.43883e+06	2.14328e+06	488769	834922	3.27344e+06	3.89914e+06	4.33123e+06		1.45222e+06	2.68414e+06	3.26274e+06	1.52559e+06	1.45266e+06	1
Q15058	Kinesin-like protein KIF14 OS=Homo sapiens OX=9606 GN=KIF14 PE=1 SV=1	0	39.19	8	11	76	11	1648	186.4	7.91	25.3	11	0	1.239	1.731	0.934426	0.00917759	68.52	44.58	152.6	63	84.5	5.59	8.22	20.91	9.72923e+06	9.61872e+06	9.33846e+06	3.48105e+06	3.57402e+06	4.26057e+06	2.53092e+06	1.86611e+06	3.16381e+06	9.72923e+06	9.9439e+06	1.08027e+07	4.05495e+06	4.10607e+06	4.68911e+06	3.85285e+06	5.82465e+06	5.50462e+06	1
Q9NX58	Cell growth-regulating nucleolar protein OS=Homo sapiens OX=9606 GN=LYAR PE=1 SV=3	0	39.145	28	8	65	8	379	43.6	9.57	21.43	8	0	1.015	0.727	0.970936	0.458449	8.52	8.7	175	70.7	54.3	62.51	40.59	10.36	6.9791e+06	7.21353e+06	1.28504e+06	3238519	1.3667e+06	2.5633e+06	1.42282e+06	710020	1.04755e+06	6.9791e+06	7.4574e+06	1.48653e+06	3.77243e+06	1.57015e+06	2.82113e+06	2.16598e+06	2.21617e+06	1.8226e+06	1
Q2VIQ3	Chromosome-associated kinesin KIF4B OS=Homo sapiens OX=9606 GN=KIF4B PE=2 SV=2	0	39.107	11	11	108	1	1234	139.9	6.18	40.4	11	0	100	0.981	1.5566e-16	0.980351		21.54	148.6		151.4			19.5			1.25451e+06				747899	542858	850357			1.45122e+06				1.13854e+06	1.69441e+06	1.47951e+06	1
P19525	Interferon-induced, double-stranded RNA-activated protein kinase OS=Homo sapiens OX=9606 GN=EIF2AK2 PE=1 SV=2	0	39.055	24	10	105	10	551	62.1	8.4	41.58	10	0	1.703	0.964	0.518227	0.995878	27.22	50.78	129.3	32.3	138.3	6.56	76.12	11.35	8.78446e+06	8.27656e+06	8.36309e+06	1.45063e+06	1.91274e+06	5.88516e+06	5.7462e+06	3.48872e+06	5.40107e+06	8.78446e+06	8.55636e+06	9.67443e+06	1.68979e+06	2.19748e+06	6.47711e+06	8.74751e+06	1.08893e+07	9.39716e+06	1
P35232	Prohibitin 1 OS=Homo sapiens OX=9606 GN=PHB1 PE=1 SV=1	0	39.044	45	8	148	8	272	29.8	5.76	52.42	8	0	0.883	0.986	0.906843	0.993551	33.8	44.29	92.8	120.8	86.4	38.75	3.75	14.95	8.10932e+06	1.76189e+07	1.10848e+07	1.43191e+07	1.48088e+07	1.43703e+07	6.40356e+06	4.22316e+06	6.85623e+06	8.10932e+06	1.82145e+07	1.28229e+07	1.66798e+07	1.70133e+07	1.58157e+07	9.74821e+06	1.31817e+07	1.19289e+07	1
Q8NHQ9	ATP-dependent RNA helicase DDX55 OS=Homo sapiens OX=9606 GN=DDX55 PE=1 SV=3	0	39.025	19	10	118	10	600	68.5	9.25	41.15	10	0	1.048	1.237	0.990879	0.540918	15.57	21.21	137.7	89.6	72.7	14.86	28.15	27.85	5.89461e+06	5.75478e+06	3.9065e+06	3.29071e+06	3.4408e+06	2.05653e+06	2.04448e+06	1.56525e+06	1.77744e+06	5.89461e+06	5.94933e+06	4.51905e+06	3.83323e+06	3.95302e+06	2.26339e+06	3.11234e+06	4.88558e+06	3.09251e+06	1
P22681	E3 ubiquitin-protein ligase CBL OS=Homo sapiens OX=9606 GN=CBL PE=1 SV=2	0	38.928	14	10	118	10	906	99.6	6.54	38.95	10	0	1.077	0.616	0.999941	0.10526	20.38	26.66	79.2	72.3	148.5	35.02	17.66	27.38	2.7643e+06	3.49337e+06	4.72594e+06	2.24462e+06	2.86954e+06	3.40082e+06	3.82013e+06	3.11392e+06	3.89009e+06	2.7643e+06	3.61147e+06	5.46698e+06	2.61468e+06	3.29672e+06	3.74289e+06	5.81544e+06	9.71943e+06	6.76825e+06	1
P32004	Neural cell adhesion molecule L1 OS=Homo sapiens OX=9606 GN=L1CAM PE=1 SV=2	0	38.703	11	8	72	8	1257	139.9	6.24	16.59	8	0	1.37	100	0.862585	1.6177e-16	17.56		173.4	126.6		16.64			888124		606131	494484						888124		701173	576006						1
O00178	GTP-binding protein 1 OS=Homo sapiens OX=9606 GN=GTPBP1 PE=1 SV=3	0	38.577	17	8	150	8	669	72.4	8.34	65.28	8	0	1.642	1.065	0.602708	0.943744	17.73	19.19	126.8	74.3	98.8	9.73	4.06	26.7	1.92754e+07	2.24273e+07	1.75075e+07	9507776	1.03643e+07	1.07895e+07	1.3455e+07	3818601	9.07406e+06	1.92754e+07	2.31855e+07	2.02527e+07	1.10753e+07	1.19072e+07	1.18747e+07	2.04828e+07	1.19189e+07	1.57877e+07	1
Q9BWF3	RNA-binding protein 4 OS=Homo sapiens OX=9606 GN=RBM4 PE=1 SV=1	0	38.531	32	9	110	3	364	40.3	7.08	49.73	9	5	1.175	0.707	0.965964	0.2419	18.71	26.13	93.4	77.1	129.5	15.77	15.44	24.45	12597562	1.49448e+07	14985829	9.05358e+06	1.11072e+07	1.30991e+07	1.40831e+07	1.00354e+07	1.1817e+07	12597562	1.545e+07	1.73356e+07	1.05462e+07	1.27607e+07	1.44167e+07	2.14388e+07	3.13234e+07	2.05601e+07	1
P84085	ADP-ribosylation factor 5 OS=Homo sapiens OX=9606 GN=ARF5 PE=1 SV=2	0	38.523	45	8	225	2	180	20.5	6.79	77.23	8	0	1.274	0.595	0.930685	0.099224	8.23	13.59	85.4	68.2	146.4	21.03	19.44	6.41	2.68581e+06	2.70502e+06	3.34798e+06	1.91621e+06	2.5985e+06	1.91556e+06	2.96323e+06	1642678	2.7556e+06	2.68581e+06	2.79647e+06	3.87295e+06	2.23212e+06	2.98532e+06	2.10823e+06	4.51097e+06	5.12726e+06	4.79439e+06	1
P61204	ADP-ribosylation factor 3 OS=Homo sapiens OX=9606 GN=ARF3 PE=1 SV=2	0	38.466	44	8	233	2	181	20.6	7.43	78.77	8	6	0.952	0.847	0.94427	0.821474	21.41	27.29	101.1	99	99.9	12.17	12.89	8.02	3.90164e+07	47322472	4.16616e+07	3.25628e+07	4.10889e+07	4.39924e+07	3.11035e+07	1.52592e+07	3.12656e+07	3.90164e+07	4.89223e+07	4.81942e+07	3.79313e+07	4.72056e+07	4.84174e+07	4.73492e+07	4.76283e+07	5.4398e+07	1
P84077	ADP-ribosylation factor 1 OS=Homo sapiens OX=9606 GN=ARF1 PE=1 SV=2	0	38.466	44	8	233	2	181	20.7	6.8	78.77	8	0	0.952	0.847	0.94427	0.821474	21.41	27.29	101.1	99	99.9	12.17	12.89	8.02	3.90164e+07	47322472	4.16616e+07	3.25628e+07	4.10889e+07	4.39924e+07	3.11035e+07	1.52592e+07	3.12656e+07	3.90164e+07	4.89223e+07	4.81942e+07	3.79313e+07	4.72056e+07	4.84174e+07	4.73492e+07	4.76283e+07	5.4398e+07	1
O95678	Keratin, type II cytoskeletal 75 OS=Homo sapiens OX=9606 GN=KRT75 PE=1 SV=2	0	38.459	13	9	169	0	551	59.5	7.74	82.11	9	0																															0
Q96HN2	Adenosylhomocysteinase 3 OS=Homo sapiens OX=9606 GN=AHCYL2 PE=1 SV=1	0	38.41	19	11	78	1	611	66.7	7.36	25.34	11	0																															1
P51151	Ras-related protein Rab-9A OS=Homo sapiens OX=9606 GN=RAB9A PE=1 SV=1	0	38.407	49	7	253	7	201	22.8	5.47	127.57	7	0	0.881	1.077	0.906476	0.93638	14.48	24.64	96.7	107.9	95.3	3.65	7.83	8.83	4.74653e+07	4.81378e+07	4.00549e+07	4.29551e+07	4.60874e+07	5.30014e+07	3.2089e+07	1.31617e+07	2.68841e+07	4.74653e+07	4.97652e+07	4.63356e+07	5.00368e+07	5.29482e+07	5.83325e+07	4.88495e+07	4.10815e+07	4.67748e+07	1
Q7Z4V5	Hepatoma-derived growth factor-related protein 2 OS=Homo sapiens OX=9606 GN=HDGFL2 PE=1 SV=1	0	38.386	18	9	122	9	671	74.3	7.49	35.08	9	0	1.588	0.735	0.658217	0.431611	20.2	34.97	96.8	36.3	166.9	34.15	69.36	2.23	3.13278e+06	4.23257e+06	5.39685e+06	1.48401e+06	1.42901e+06	218999	4.95509e+06	2.32922e+06	4.35232e+06	3.13278e+06	4.37566e+06	6.24308e+06	1.72867e+06	1.64174e+06	241027	7.5432e+06	7.27015e+06	7.57248e+06	1
P04083	Annexin A1 OS=Homo sapiens OX=9606 GN=ANXA1 PE=1 SV=2	0	38.37	33	9	141	9	346	38.7	7.02	57.96	9	0	1.045	1.225	0.990398	0.568461	34.93	39.98	101.5	119.1	79.4	36.29	11.61	17.35	1.78805e+07	30434066	1.4859e+07	1.46705e+07	1.82551e+07	1.92062e+07	8.71933e+06	5.80779e+06	8.03189e+06	1.78805e+07	3.14629e+07	1.71889e+07	1.70891e+07	2.09726e+07	2.1138e+07	1.32735e+07	1.81278e+07	1.39744e+07	1
Q66K74	Microtubule-associated protein 1S OS=Homo sapiens OX=9606 GN=MAP1S PE=1 SV=2	0	38.359	13	9	82	9	1059	112.1	7.3	28.06	9	0	1.644	0.945	0.599762	0.988467	22.87	20.04	128.4	63.7	107.8	29.09	31.46	10.03	9.10092e+06	1.24857e+07	6.34477e+06	3.87748e+06	2.72012e+06	5.43539e+06	5.01956e+06	2.56771e+06	3.7824e+06	9.10092e+06	1.29078e+07	7.33964e+06	4.51673e+06	3.12505e+06	5.9821e+06	7.64134e+06	8.01456e+06	6.58089e+06	1
Q9UHD8	Septin-9 OS=Homo sapiens OX=9606 GN=SEPTIN9 PE=1 SV=2	0	38.294	19	9	148	9	586	65.4	8.97	70.79	9	0	1.439	0.957	0.820843	0.983822	19.35	20.07	113.3	72.8	114	14.11	5.52	2.28	1.52802e+07	1.8906e+07	1.72148e+07	9.92064e+06	1.11877e+07	1.14103e+07	1.31341e+07	6.29949e+06	1.09839e+07	1.52802e+07	1.95452e+07	1.99141e+07	1.15562e+07	1.28532e+07	1.2558e+07	1.99942e+07	1.96625e+07	1.91106e+07	1
Q7Z2T5	TRMT1-like protein OS=Homo sapiens OX=9606 GN=TRMT1L PE=1 SV=2	0	38.261	18	9	121	9	733	81.7	7.88	45.88	9	0	1.147	0.977	0.970936	0.995444	15.7	18.25	100.4	86.8	112.8	11.14	8.91	10.63	1.28813e+07	1.13239e+07	1.26209e+07	9.55454e+06	1.10959e+07	9.84227e+06	8.31271e+06	5.01855e+06	8.31755e+06	1.28813e+07	1.17068e+07	1.45999e+07	1.11297e+07	1.27477e+07	1.08322e+07	1.26546e+07	1.56643e+07	1.44715e+07	1
Q5SW79	Centrosomal protein of 170 kDa OS=Homo sapiens OX=9606 GN=CEP170 PE=1 SV=1	0	38.21	8	9	78	9	1584	175.2	7.11	31.35	9	0	1.67	1.041	0.562788	0.948799	32.37	25.21	116.7	72.7	110.6	17.96	7.15	10.34	5.26048e+06	6.73507e+06	6.51238e+06	3.35173e+06	3.90631e+06	3.94294e+06	4.66864e+06	2.11373e+06	3.32012e+06	5.26048e+06	6.96276e+06	7.53353e+06	3.90431e+06	4.48783e+06	4.33954e+06	7.10712e+06	6.59756e+06	5.77657e+06	1
P08621	U1 small nuclear ribonucleoprotein 70 kDa OS=Homo sapiens OX=9606 GN=SNRNP70 PE=1 SV=2	0	38.187	20	8	193	8	437	51.5	9.94	87.46	8	0	1.128	1.023	0.978238	0.980177	22.54	28.78	107.4	93	99.6	14.91	2.77	17.18	3.60184e+07	4.17199e+07	4.2095e+07	3.18181e+07	3.24859e+07	3.54257e+07	2.62545e+07	1.65985e+07	2.18915e+07	3.60184e+07	4.31303e+07	4.86955e+07	3.70638e+07	3.73219e+07	3.8989e+07	3.99675e+07	5.18086e+07	3.80884e+07	1
Q9Y2R4	Probable ATP-dependent RNA helicase DDX52 OS=Homo sapiens OX=9606 GN=DDX52 PE=1 SV=4	0	38.183	22	9	82	9	599	67.4	9.67	17.44	9	0	1.884	1.556	0.290601	0.119551	42.52	21.56	159.8	53.2	87	17.27	56.59	29.53	2.42528e+06	2.97406e+06	1.92229e+06	512968	702768	1.54537e+06	867364	568302	560507	2.42528e+06	3.0746e+06	2.2237e+06	597538	807386	1.70081e+06	1.3204e+06	1.77383e+06	975210	1
Q99570	Phosphoinositide 3-kinase regulatory subunit 4 OS=Homo sapiens OX=9606 GN=PIK3R4 PE=1 SV=3	0	38.137	9	10	76	10	1358	153	7.17	24.45	10	0	0.95	1.142	0.942678	0.805202	27.95	25.74	111.5	111.9	76.6	12.17	18.34	14.48	5.05287e+06	4.82025e+06	3.48479e+06	4.05588e+06	4.35072e+06	5.9699e+06	2.24781e+06	1.25458e+06	1.68134e+06	5.05287e+06	4.9832e+06	4.03121e+06	4.72455e+06	4.99839e+06	6.57038e+06	3.42187e+06	3.9159e+06	2.92532e+06	1
Q9NW82	WD repeat-containing protein 70 OS=Homo sapiens OX=9606 GN=WDR70 PE=1 SV=1	0	38.129	15	10	88	10	654	73.2	6.33	38.03	10	0	1.325	0.797	0.905382	0.805605	16.58	35.03	106.7	73.4	119.9	26.88	8.7	26.21	6.71968e+06	5.35114e+06	8.04753e+06	4.13634e+06	4.02068e+06	3.69181e+06	4.7475e+06	3629907	4.33982e+06	6.71968e+06	5.53205e+06	9.30939e+06	4.81827e+06	4.61922e+06	4.06315e+06	7.22717e+06	1.133e+07	7.55073e+06	1
Q9H223	EH domain-containing protein 4 OS=Homo sapiens OX=9606 GN=EHD4 PE=1 SV=1	0	38.122	19	10	154	6	541	61.1	6.76	59.94	10	0	0.866	1.25	0.889813	0.518371	9.69	7.64	104.4	112.6	83.1	17.83	7.22	0.69	9.72739e+06	6.78086e+06	8.42378e+06	8.41549e+06	9.85598e+06	9.53151e+06	5.07901e+06	2.48054e+06	4.50015e+06	9.72739e+06	7.0101e+06	9.74464e+06	9.80289e+06	1.13232e+07	1.04902e+07	7.73184e+06	7.74246e+06	7.82968e+06	1
Q9NSD9	Phenylalanine--tRNA ligase beta subunit OS=Homo sapiens OX=9606 GN=FARSB PE=1 SV=3	0	38.039	18	9	164	9	589	66.1	6.84	63.8	9	0	1.48	1.155	0.76677	0.774567	23.76	24.54	134.3	74.1	91.6	6.31	22.99	23.17	1.2693e+07	1.18962e+07	9700627	7.75157e+06	5.04681e+06	6.16223e+06	7.93937e+06	2.68608e+06	4.6808e+06	1.2693e+07	1.22984e+07	1.12217e+07	9.02951e+06	5.7981e+06	6.78205e+06	1.20862e+07	8.384e+06	8.14398e+06	1
A4D1E9	GTP-binding protein 10 OS=Homo sapiens OX=9606 GN=GTPBP10 PE=1 SV=1	0	38.032	35	10	111	10	387	42.9	9.03	39.69	10	0	0.967	1.122	0.962711	0.860198	23.22	27.55	104.8	107.9	87.3	15.56	5.5	27.6	1.36529e+07	14713300	9.59873e+06	1.20639e+07	1.31525e+07	1.23389e+07	7.47141e+06	2.14648e+06	6.56769e+06	1.36529e+07	1.52107e+07	1.11038e+07	1.40528e+07	1.51105e+07	1.358e+07	1.13738e+07	6.69978e+06	1.14269e+07	1
P23526	Adenosylhomocysteinase OS=Homo sapiens OX=9606 GN=AHCY PE=1 SV=4	0	37.918	28	10	115	10	432	47.7	6.34	49.68	10	0	1.207	0.903	0.959313	0.958055	15.57	21.98	102.5	87.7	109.9	30.27	7.62	5.23	5.78117e+06	9.17534e+06	5.03046e+06	3.92614e+06	4.63819e+06	4.52314e+06	4.09764e+06	1.96417e+06	3.8819e+06	5.78117e+06	9.48553e+06	5.81924e+06	4.57341e+06	5.32865e+06	4.9781e+06	6.2379e+06	6.13073e+06	6.754e+06	1
Q14562	ATP-dependent RNA helicase DHX8 OS=Homo sapiens OX=9606 GN=DHX8 PE=1 SV=1	0	37.873	13	11	58	11	1220	139.2	8.32	20.82	11	0	1.29	1.953	0.92694	0.00417689	22.86	28.22	126.3	109.1	64.6	30.66	8.77	2.65	2.21837e+06	2.71984e+06	3.4883e+06	2085423	2.27793e+06	1.99383e+06	970702	461248	805392	2.21837e+06	2.81179e+06	4.03527e+06	2.42923e+06	2.61703e+06	2.19438e+06	1.47771e+06	1.43968e+06	1.40128e+06	1
P61586	Transforming protein RhoA OS=Homo sapiens OX=9606 GN=RHOA PE=1 SV=1	0	37.832	40	7	188	2	193	21.8	6.1	72.04	7	5	0.921	0.918	0.930685	0.954745	31.51	46.89	103.1	113.4	83.5	14.72	16.95	6.56	5.78964e+07	4.17917e+07	4.26197e+07	3.70009e+07	5.289e+07	4.92886e+07	2.35906e+07	1.28045e+07	2.33391e+07	5.78964e+07	4.32045e+07	4.93025e+07	4.3101e+07	6.07634e+07	5.42463e+07	3.59122e+07	3.99664e+07	4.06069e+07	1
Q14181	DNA polymerase alpha subunit B OS=Homo sapiens OX=9606 GN=POLA2 PE=1 SV=2	0	37.826	20	8	104	8	598	65.9	5.24	32.64	8	0	2.33	0.943	0.0701651	0.992464	23.1	28.49	129.6	47.4	122.9	36.74	14.51	31.73	5.75423e+06	3.77584e+06	7.15707e+06	1811172	1.40936e+06	1.91395e+06	3.20438e+06	2.75518e+06	3.13685e+06	5.75423e+06	3.90348e+06	8.2793e+06	2.10977e+06	1.61917e+06	2.10646e+06	4.87807e+06	8.5997e+06	5.45771e+06	1
Q5T280	Putative methyltransferase C9orf114 OS=Homo sapiens OX=9606 GN=SPOUT1 PE=1 SV=3	0	37.823	33	9	121	9	376	42	7.43	47.29	9	0	3.7	1.121	0.000213376	0.860198	38.44	15.84	134.8	16.4	148.8	9.15	56.41	27.85	1.10657e+07	1.1634e+07	1.14789e+07	2.27336e+06	712287	1.33327e+06	8.71901e+06	2.58014e+06	8.12567e+06	1.10657e+07	1.20273e+07	1.32788e+07	2.64815e+06	818322	1.46738e+06	1.32731e+07	8.05335e+06	1.41376e+07	1
Q15003	Condensin complex subunit 2 OS=Homo sapiens OX=9606 GN=NCAPH PE=1 SV=3	0	37.798	14	8	108	8	741	82.5	5.06	50.73	8	0	1.365	0.724	0.877877	0.482053	22.7	11.77	91.7	67	141.3	15.02	27.25	10.5	5.74522e+06	5.9073e+06	6.55429e+06	3.82691e+06	4.55441e+06	2.6982e+06	6.18094e+06	3.08069e+06	4.5353e+06	5.74522e+06	6.10701e+06	7.58201e+06	4.45782e+06	5.2324e+06	2.96959e+06	9.40933e+06	9.61572e+06	7.89083e+06	1
Q9Y2H5	Pleckstrin homology domain-containing family A member 6 OS=Homo sapiens OX=9606 GN=PLEKHA6 PE=1 SV=4	0	37.779	11	11	112	11	1048	117.1	9.1	35.33	11	0	1.773	0.604	0.443378	0.0895674	15.05	29.63	104.8	39.5	155.7	18.7	11.85	32.49	4.50968e+06	6.0217e+06	5.60548e+06	2.01375e+06	1.85556e+06	2.44683e+06	6.07433e+06	4.52498e+06	4.41121e+06	4.50968e+06	6.22527e+06	6.48442e+06	2.34574e+06	2.13179e+06	2.69294e+06	9.24703e+06	1.41237e+07	7.67493e+06	1
P51812	Ribosomal protein S6 kinase alpha-3 OS=Homo sapiens OX=9606 GN=RPS6KA3 PE=1 SV=1	0	37.779	16	9	101	7	740	83.7	6.89	39.23	9	0	0.972	1.129	0.965964	0.829756	12.54	26.25	107.5	104.5	87.9	1.23	9.79	10.3	8.37561e+06	8215078	7.4203e+06	6.44218e+06	7.18554e+06	8.29312e+06	4.56092e+06	2.34467e+06	3.43253e+06	8.37561e+06	8.4928e+06	8.58381e+06	7.50426e+06	8.25522e+06	9.12728e+06	6.94315e+06	7.31837e+06	5.97216e+06	1
Q9Y4E8	Ubiquitin carboxyl-terminal hydrolase 15 OS=Homo sapiens OX=9606 GN=USP15 PE=1 SV=3	0	37.741	13	10	106	9	981	112.3	5.22	39.99	10	0	0.647	0.602	0.425205	0.258601	13.06	53.25	92.6	89	118.4	118.34	127.88	76.97	466247		4.5354e+06		5.83313e+06	306144	1.31379e+06	1.60719e+06	604686	466247		5.24656e+06		6.70148e+06	336937	1.99999e+06	5.01648e+06	1.05208e+06	1
P52294	Importin subunit alpha-5 OS=Homo sapiens OX=9606 GN=KPNA1 PE=1 SV=3	0	37.726	20	9	206	6	538	60.2	5.01	101	9	2	1.339	0.785	0.893112	0.589342	24.74	43.56	100.7	55.1	144.2	10.49	29.01	32.18	1.51702e+07	1.57022e+07	1.60655e+07	7.60859e+06	1.23883e+07	8.07581e+06	1.27131e+07	1.1339e+07	1.33602e+07	1.51702e+07	1.62331e+07	1.85845e+07	8.86296e+06	1.42325e+07	8.88811e+06	1.93534e+07	3.53921e+07	2.32451e+07	1
P42167	Lamina-associated polypeptide 2, isoforms beta/gamma OS=Homo sapiens OX=9606 GN=TMPO PE=1 SV=2	0	37.693	29	8	123	2	454	50.6	9.38	41.06	8	0																															1
Q13131	5'-AMP-activated protein kinase catalytic subunit alpha-1 OS=Homo sapiens OX=9606 GN=PRKAA1 PE=1 SV=4	0	37.688	14	9	208	9	559	64	8.12	78.67	9	0	0.945	1.011	0.93889	0.974248	18.74	27.93	95	113.6	91.4	11.41	23.96	14.83	1.24571e+07	14266996	1.03348e+07	1.27865e+07	1.42364e+07	9.13442e+06	7.87142e+06	4.82249e+06	6.64054e+06	1.24571e+07	1.47493e+07	1.19553e+07	1.48946e+07	1.63557e+07	1.00532e+07	1.19828e+07	1.50524e+07	1.15537e+07	1
Q8TDN6	Ribosome biogenesis protein BRX1 homolog OS=Homo sapiens OX=9606 GN=BRIX1 PE=1 SV=2	0	37.687	32	9	131	9	353	41.4	9.92	46.02	9	0	1.069	1.034	0.99661	0.956845	26.29	29.39	103.6	118.6	77.8	8.23	6.23	23.47	1.25172e+07	1.41711e+07	11316493	12860597	1.3734e+07	1.26542e+07	8.76714e+06	3.14973e+06	4.91613e+06	1.25172e+07	1.46502e+07	1.30909e+07	1.49808e+07	1.57785e+07	1.3927e+07	1.33463e+07	9.83119e+06	8.55343e+06	1
Q13443	Disintegrin and metalloproteinase domain-containing protein 9 OS=Homo sapiens OX=9606 GN=ADAM9 PE=1 SV=1	0	37.668	16	10	69	10	819	90.5	7.52	22.54	10	0	0.801	0.852	0.802465	0.920567	18.73	17.42	73.8	105.5	120.6	27.18	12.59	3.08	3.59917e+06	3.15724e+06	4.59979e+06	3.62388e+06	4.47884e+06	4.9051e+06	3.86283e+06	1.81321e+06	3.45827e+06	3.59917e+06	3.26397e+06	5.32104e+06	4.22132e+06	5.14558e+06	5.39848e+06	5.88044e+06	5.65953e+06	6.01694e+06	1
P62873	Guanine nucleotide-binding protein G(I)/G(S)/G(T) subunit beta-1 OS=Homo sapiens OX=9606 GN=GNB1 PE=1 SV=3	0	37.655	32	9	291	4	340	37.4	6	152.24	9	5	1.024	0.962	0.976582	0.983159	18.1	25.92	98.6	90.4	111	12.7	7.99	6.93	6.17316e+07	6.70524e+07	6.87137e+07	4.83947e+07	5.53333e+07	5.98367e+07	5.12533e+07	2.2437e+07	4.59647e+07	6.17316e+07	6.93192e+07	7.9488e+07	5.63732e+07	6.35705e+07	6.58554e+07	7.80236e+07	7.00322e+07	7.99726e+07	1
Q8N6T3	ADP-ribosylation factor GTPase-activating protein 1 OS=Homo sapiens OX=9606 GN=ARFGAP1 PE=1 SV=2	0	37.616	34	9	65	9	406	44.6	5.66	30.99	9	0	0.965	0.523	0.960396	0.01115	29.68	38.13	63.4	88.4	148.2	38.1	15.11	27.95	2.57361e+06	1.82585e+06	3.45143e+06	2.58827e+06	3.12182e+06	3717643	3.94981e+06	2.99514e+06	3.36051e+06	2.57361e+06	1.88757e+06	3.99262e+06	3.01498e+06	3.58655e+06	4.09158e+06	6.01285e+06	9.34868e+06	5.84686e+06	1
Q15008	26S proteasome non-ATPase regulatory subunit 6 OS=Homo sapiens OX=9606 GN=PSMD6 PE=1 SV=1	0	37.61	28	10	62	10	389	45.5	5.62	18.05	10	0	0.963	1.144	0.958119	0.799239	20.93	33.9	98.3	110.8	90.9	15.04	17.95	23.29	2.23843e+06	2.74021e+06	2.60475e+06	2.02138e+06	2.90702e+06	2.90298e+06	1.72119e+06	711417	2.00301e+06	2.23843e+06	2.83285e+06	3.01318e+06	2.35463e+06	3.33978e+06	3.19498e+06	2.62019e+06	2.22053e+06	3.48499e+06	1
Q8N2S1	Latent-transforming growth factor beta-binding protein 4 OS=Homo sapiens OX=9606 GN=LTBP4 PE=1 SV=2	0	37.596	10	10	68	10	1624	173.3	5.43	14.32	10	0	0.915	0.604	0.932471	0.430724	40.81	38.18	62.4	68.1	169.5	37.53		34.93	579046	964846		712889			1.35699e+06	795721	676996	579046	997464		830418			2.06576e+06	2.48367e+06	1.17789e+06	1
P47813	Eukaryotic translation initiation factor 1A, X-chromosomal OS=Homo sapiens OX=9606 GN=EIF1AX PE=1 SV=2	0	37.596	65	8	116	8	144	16.5	5.24	43.08	8	0	1.293	0.969	0.923473	0.992706	19.64	36.39	121.5	77.9	100.6	23.87	2.19	37.07	2.00662e+07	13894749	2.03049e+07	1.08409e+07	1.12096e+07	1.19859e+07	7.57495e+06	7.82693e+06	9.55278e+06	2.00662e+07	1.43645e+07	2.34887e+07	1.26282e+07	1.28783e+07	1.31915e+07	1.15314e+07	2.44301e+07	1.66206e+07	1
Q6NUK1	Mitochondrial adenyl nucleotide antiporter SLC25A24 OS=Homo sapiens OX=9606 GN=SLC25A24 PE=1 SV=2	0	37.586	23	9	152	9	477	53.3	6.33	61.15	9	0	0.919	0.784	0.930685	0.602498	28.4	29.28	96.1	101.1	102.8	5.47	16.1	8.27	1.75772e+07	1.86753e+07	1.67698e+07	14421084	2.02568e+07	1.84693e+07	1.35697e+07	7.55019e+06	1.16876e+07	1.75772e+07	1.93066e+07	1.93994e+07	1.67986e+07	2.32723e+07	2.0327e+07	2.06573e+07	2.35663e+07	2.0335e+07	1
P28288	ATP-binding cassette sub-family D member 3 OS=Homo sapiens OX=9606 GN=ABCD3 PE=1 SV=1	0	37.501	18	10	155	10	659	75.4	9.36	59.21	10	0	0.917	1.042	0.930685	0.954745	22.95	35.18	102.4	101.8	95.8	8.88	0.61	9.84	7.73741e+06	8.55864e+06	7.95213e+06	7.49783e+06	7.69528e+06	7.99027e+06	5.43367e+06	2.8833e+06	4.24477e+06	7.73741e+06	8.84798e+06	9.19904e+06	8.73395e+06	8.84083e+06	8.79396e+06	8.27175e+06	8.99958e+06	7.38536e+06	1
P56182	Ribosomal RNA processing protein 1 homolog A OS=Homo sapiens OX=9606 GN=RRP1 PE=1 SV=1	0	37.457	17	8	126	8	461	52.8	9.33	52.88	8	0	1.375	1.046	0.871913	0.959746	25.46	34.62	93.7	81	125.3	21.19	13.11	16.27	2.09976e+07	2.65458e+07	2.79903e+07	2.22808e+07	1.73543e+07	2.15465e+07	2.1136e+07	1.41984e+07	2.10834e+07	2.09976e+07	2.74432e+07	3.23792e+07	2.5954e+07	1.99377e+07	2.37137e+07	3.21757e+07	4.43171e+07	3.66823e+07	1
Q9Y2X3	Nucleolar protein 58 OS=Homo sapiens OX=9606 GN=NOP58 PE=1 SV=1	0	37.439	24	9	107	9	529	59.5	8.92	43.69	9	0	1.548	0.999	0.694503	0.983159	13.94	16.44	115.4	66.2	118.4	9.18	9.93	13.73	1.06229e+07	9.22563e+06	9.91454e+06	4.66822e+06	5.30809e+06	6.03244e+06	7.15997e+06	2.85175e+06	6.72441e+06	1.06229e+07	9.53752e+06	1.14691e+07	5.43783e+06	6.09828e+06	6.6392e+06	1.08997e+07	8.90111e+06	1.16996e+07	1
P26368	Splicing factor U2AF 65 kDa subunit OS=Homo sapiens OX=9606 GN=U2AF2 PE=1 SV=4	0	37.428	13	7	137	7	475	53.5	9.09	64.54	7	0	1.245	1.062	0.932471	0.945108	21.23	31.98	108.2	81.3	110.5	22.37	4.85	14.37	17361823	1.87923e+07	2.27808e+07	1.25221e+07	1.29522e+07	1.23168e+07	1.01634e+07	6.35683e+06	1.1667e+07	17361823	1.94276e+07	2.63529e+07	1.45865e+07	1.48803e+07	1.35557e+07	1.54719e+07	1.98415e+07	2.0299e+07	1
P07996	Thrombospondin-1 OS=Homo sapiens OX=9606 GN=THBS1 PE=1 SV=2	0	37.394	10	9	101	9	1170	129.3	4.94	38.95	9	0	1.09	0.62	0.99661	0.125662	42.15	40.8	93.2	54.8	152	22.79	36.88	17.91	3.52956e+06	2.83312e+06	3.96485e+06	1.61356e+06	1.80735e+06	3.24528e+06	3.71201e+06	2.45809e+06	3306959	3.52956e+06	2.92889e+06	4.58654e+06	1.87957e+06	2.0764e+06	3.5717e+06	5.65084e+06	7.67239e+06	5.75368e+06	1
Q9UI10	Translation initiation factor eIF2B subunit delta OS=Homo sapiens OX=9606 GN=EIF2B4 PE=1 SV=2	0	37.392	23	9	165	9	523	57.5	9.38	51.48	9	0	0.908	1.092	0.930439	0.905467	16.48	9.04	120.3	119.1	60.6	7.05	12.03	35.51	1.15166e+07	1.21091e+07	1.14651e+07	9.47266e+06	1.07904e+07	1.27526e+07	7.28004e+06	1.98185e+06	3.62761e+06	1.15166e+07	1.25185e+07	1.32628e+07	1.10343e+07	1.23967e+07	1.40353e+07	1.10825e+07	6.18592e+06	6.31157e+06	1
P50991	T-complex protein 1 subunit delta OS=Homo sapiens OX=9606 GN=CCT4 PE=1 SV=4	0	37.381	18	9	234	9	539	57.9	7.83	116.49	9	0	1.201	1.069	0.96507	0.948143	13.22	20.27	108.2	88.1	103.7	5.36	3.46	5.37	4.02981e+07	3.87947e+07	3.80775e+07	2.74194e+07	2.85814e+07	3.10819e+07	2.5373e+07	1.22605e+07	2.42102e+07	4.02981e+07	4.01062e+07	4.40481e+07	3.19398e+07	3.28362e+07	3.42082e+07	3.86257e+07	3.82686e+07	4.21227e+07	1
P13667	Protein disulfide-isomerase A4 OS=Homo sapiens OX=9606 GN=PDIA4 PE=1 SV=2	0	37.351	19	10	105	10	645	72.9	5.07	37.05	10	0	0.793	0.911	0.789453	0.970447	24.91	46.72	78.4	119.8	101.8	23.31	6.85	22.13	4701008	7.29071e+06	5.95522e+06	8.02356e+06	9.16408e+06	9.60689e+06	5.55551e+06	4.00476e+06	5.14251e+06	4701008	7.53719e+06	6.889e+06	9.34634e+06	1.05283e+07	1.05732e+07	8.45722e+06	1.25e+07	8.9473e+06	1
Q8N6R0	eEF1A lysine and N-terminal methyltransferase OS=Homo sapiens OX=9606 GN=METTL13 PE=1 SV=1	0	37.34	16	10	135	10	699	78.7	6.73	50.33	10	0	1.36	0.964	0.881989	0.995878	32.82	31.95	108	65.9	126.1	11.28	18.9	8.46	6.12908e+06	7.43032e+06	5.92409e+06	4.21298e+06	2.90945e+06	3.79921e+06	4.64333e+06	2.67332e+06	4.60095e+06	6.12908e+06	7.68152e+06	6.85299e+06	4.90754e+06	3.34256e+06	4.18135e+06	7.0686e+06	8.34418e+06	8.00505e+06	1
P00533	Epidermal growth factor receptor OS=Homo sapiens OX=9606 GN=EGFR PE=1 SV=2	0	37.332	9	10	152	9	1210	134.2	6.68	61.19	10	1	0.739	0.929	0.678974	0.972212	21.49	22.25	83.7	122.7	93.5	2.37	7.88	10.8	1.37037e+07	1.26467e+07	1.15255e+07	1.55535e+07	1.70082e+07	1.92704e+07	9.79789e+06	3.93388e+06	8.55716e+06	1.37037e+07	1.30743e+07	1.33327e+07	1.81177e+07	1.95401e+07	2.12087e+07	1.49155e+07	1.22788e+07	1.48883e+07	1
P14314	Glucosidase 2 subunit beta OS=Homo sapiens OX=9606 GN=PRKCSH PE=1 SV=2	0	37.31	20	8	148	8	528	59.4	4.41	62.92	8	0	0.622	0.544	0.336928	0.0235664	20.15	34.74	66.2	133.4	100.3	16.41	20.32	13.91	4.00575e+06	2.78537e+06	3.16093e+06	6.32214e+06	8.49951e+06	6.08362e+06	3.63776e+06	2.1608e+06	2.99055e+06	4.00575e+06	2.87954e+06	3.65657e+06	7.36442e+06	9.76479e+06	6.69553e+06	5.5378e+06	6.74447e+06	5.20317e+06	1
Q96T37	RNA-binding protein 15 OS=Homo sapiens OX=9606 GN=RBM15 PE=1 SV=2	0	37.289	12	9	88	8	977	107.1	10.08	29.31	9	1	0.935	0.973	0.932471	0.993551	31.85	15.16	98	99.4	102.7	7.05	11.95	5.71	6.3136e+06	6.09547e+06	6.14619e+06	4853966	5.57327e+06	6.53038e+06	3.94161e+06	2.1316e+06	3.80224e+06	6.3136e+06	6.30154e+06	7.10992e+06	5.65421e+06	6.40294e+06	7.18724e+06	6.00037e+06	6.65332e+06	6.61541e+06	1
Q9Y2X7	ARF GTPase-activating protein GIT1 OS=Homo sapiens OX=9606 GN=GIT1 PE=1 SV=2	0	37.284	15	9	113	6	761	84.3	6.8	47.37	9	0	0.953	0.476	0.944469	0.00331504	27.17	26.55	68.1	66.2	165.7	44.25	13.61	33.42	1.14167e+06	2.48345e+06	2.65218e+06	2.52813e+06	2.17136e+06	2.0513e+06	2.98431e+06	2.84965e+06	3.59112e+06	1.14167e+06	2.56741e+06	3.06805e+06	2.94492e+06	2.4946e+06	2.25763e+06	4.54305e+06	8.89457e+06	6.24808e+06	1
Q86U38	Nucleolar protein 9 OS=Homo sapiens OX=9606 GN=NOP9 PE=1 SV=1	0	37.279	22	8	92	8	636	69.4	7.28	35.11	8	0	1.625	1.024	0.585533	0.954745	18.6	12.09	85.8	55.9	158.3	11.42	18.15	17	1.93669e+06	2021815	2.08939e+06	1.0233e+06	1.47792e+06	1.23839e+06	2.53407e+06	1.46577e+06	1.86939e+06	1.93669e+06	2.09017e+06	2.417e+06	1.192e+06	1.69793e+06	1.36295e+06	3.85765e+06	4.5751e+06	3.25249e+06	1
Q9BS26	Endoplasmic reticulum resident protein 44 OS=Homo sapiens OX=9606 GN=ERP44 PE=1 SV=1	0	37.182	22	8	146	8	406	46.9	5.26	53.47	8	0	0.758	1.063	0.713536	0.929972	21.05	29.57	94.6	125	80.4	16.6	10.11	4.9	1.04619e+07	1.41278e+07	1.15483e+07	1.28501e+07	1.53668e+07	1.64894e+07	7.15316e+06	3.6379e+06	6.8989e+06	1.04619e+07	1.46054e+07	1.33591e+07	1.49686e+07	1.76544e+07	1.81479e+07	1.08894e+07	1.13549e+07	1.20032e+07	1
Q9UBF2	Coatomer subunit gamma-2 OS=Homo sapiens OX=9606 GN=COPG2 PE=1 SV=1	0	37.127	17	10	75	10	871	97.6	5.81	25.62	10	0	0.865	0.963	0.889059	0.994006	21.04	8.68	95.3	104.8	100	18.74	4.23	26.18	4829986	6.65507e+06	5.85767e+06	6.12331e+06	6.48846e+06	7054047	4.67117e+06	1.39616e+06	4.1725e+06	4829986	6.88005e+06	6.77616e+06	7.13282e+06	7.45436e+06	7.76357e+06	7.11098e+06	4.35782e+06	7.2596e+06	1
P26358	DNA (cytosine-5)-methyltransferase 1 OS=Homo sapiens OX=9606 GN=DNMT1 PE=1 SV=2	0	37.054	10	12	73	12	1616	183.1	7.75	18.59	12	0	3.735	1.289	0.000184168	0.431611	13.24	29.11	183.9	14.9	101.2	26.39	6.03	13.45	2.65438e+06	4.38317e+06	3.62798e+06		309169	296353	1.3436e+06	740164	1.53645e+06	2.65438e+06	4.53135e+06	4.19685e+06		355194	326161	2.04537e+06	2.31026e+06	2.67322e+06	1
Q13488	V-type proton ATPase 116 kDa subunit a 3 OS=Homo sapiens OX=9606 GN=TCIRG1 PE=1 SV=3	0	37	15	11	102	11	830	92.9	7.12	34.98	11	0	0.308	0.88	0.000153585	0.906189	28.59	18.1	76.7	132.1	91.2	10.74	8.46	7.74	1.98441e+07	2.26357e+07	2.11601e+07	3.1921e+07	3.50881e+07	4.00037e+07	1.82692e+07	9.22022e+06	1.42307e+07	1.98441e+07	2.3401e+07	2.4478e+07	3.71836e+07	4.03115e+07	4.40274e+07	2.78114e+07	2.87789e+07	2.47595e+07	1
Q96KP1	Exocyst complex component 2 OS=Homo sapiens OX=9606 GN=EXOC2 PE=1 SV=1	0	36.971	14	11	96	11	924	104	6.9	30.53	11	0	0.873	1.114	0.899689	0.851442	17.56	27.5	97.9	109	93	11.69	7.24	8.35	5.26616e+06	6.44078e+06	5.31165e+06	5.18601e+06	5.95623e+06	6.26133e+06	3.83513e+06	1.66865e+06	3.53308e+06	5.26616e+06	6.65853e+06	6.14452e+06	6.04099e+06	6.8429e+06	6.89112e+06	5.83826e+06	5.20834e+06	6.14711e+06	1
Q9Y4L1	Hypoxia up-regulated protein 1 OS=Homo sapiens OX=9606 GN=HYOU1 PE=1 SV=1	0	36.97	11	9	68	9	999	111.3	5.22	18.57	9	0	0.867	1.075	0.891092	0.903222	19.04	13.54	92.6	123.8	83.6	43.47	31.32	118.31	3.10484e+06	7.29971e+06	4.15911e+06	3.93216e+06	7.56129e+06	5.84467e+06	2.85143e+06	1.21437e+06	1.74368e+07	3.10484e+06	7.54649e+06	4.81127e+06	4.58042e+06	8.68691e+06	6.43255e+06	4.34077e+06	3.79041e+06	3.03377e+07	1
Q14566	DNA replication licensing factor MCM6 OS=Homo sapiens OX=9606 GN=MCM6 PE=1 SV=1	0	36.965	14	11	104	11	821	92.8	5.41	40.47	11	0	1.051	0.668	0.992122	0.238428	28.89	21.36	94.8	64	141.2	41.39	26.8	38.79	6.04583e+06	2.67913e+06	5.92195e+06	4.25222e+06	3.54962e+06	2.58231e+06	5.9112e+06	4.06613e+06	3.23534e+06	6.04583e+06	2.7697e+06	6.85052e+06	4.95325e+06	4.07803e+06	2.84206e+06	8.99869e+06	1.26916e+07	5.62907e+06	1
P40939	Trifunctional enzyme subunit alpha, mitochondrial OS=Homo sapiens OX=9606 GN=HADHA PE=1 SV=2	0	36.904	22	11	139	11	763	82.9	9.04	67.25	11	0	1.37	1.013	0.877877	0.972518	27.63	26.66	106.3	82.9	110.8	17.51	5.49	7.63	1.00765e+07	1.17872e+07	1.24041e+07	8.57398e+06	7.78878e+06	8.63801e+06	8.43333e+06	4.07047e+06	6.41349e+06	1.00765e+07	1.21857e+07	1.4349e+07	9.98751e+06	8.94825e+06	9.50686e+06	1.28382e+07	1.27051e+07	1.11586e+07	1
P22087	rRNA 2'-O-methyltransferase fibrillarin OS=Homo sapiens OX=9606 GN=FBL PE=1 SV=2	0	36.866	31	8	286	8	321	33.8	10.18	110.06	8	0	1.312	1.184	0.907599	0.746833	8.84	19.04	111.8	87.1	101.1	2.32	2.2	4.54	5.02924e+07	50948958	4.46507e+07	3.45221e+07	3.6356e+07	3.65437e+07	31361688	14003143	2.68283e+07	5.02924e+07	5.26714e+07	5.1652e+07	4.02135e+07	4.17682e+07	4.02194e+07	4.77423e+07	4.37078e+07	4.66777e+07	1
Q13535	Serine/threonine-protein kinase ATR OS=Homo sapiens OX=9606 GN=ATR PE=1 SV=3	0	36.854	4	10	87	10	2644	301.2	7.43	23.72	10	0	0.934	1.25	0.932471	0.532931	22.54	38.65	113	107.5	79.5	8.66	7.5	8.47	3.17778e+06	3026109	3.15435e+06	2.94039e+06	2.63266e+06	2.73214e+06	1.36782e+06	716484	1.41559e+06	3.17778e+06	3.12841e+06	3.64895e+06	3.42515e+06	3.02458e+06	3.00695e+06	2.08225e+06	2.23635e+06	2.46294e+06	1
P83881	Large ribosomal subunit protein eL42 OS=Homo sapiens OX=9606 GN=RPL36A PE=1 SV=2	0	36.849	41	7	270	2	106	12.4	10.58	147.83	7	5	1.43	0.993	0.832075	0.998303	17.07	32.86	110.3	76.7	113	7.93	10.12	7.82	7.96776e+07	8.37039e+07	8.07471e+07	5.34177e+07	4.45879e+07	5.47172e+07	6.62877e+07	2.84063e+07	5.06379e+07	7.96776e+07	8.65337e+07	9.34083e+07	6.22243e+07	5.12255e+07	6.02209e+07	1.00911e+08	8.86642e+07	8.81033e+07	1
P42285	Exosome RNA helicase MTR4 OS=Homo sapiens OX=9606 GN=MTREX PE=1 SV=3	0	36.786	10	9	106	9	1042	117.7	6.52	42.97	9	0	1.267	1.338	0.930685	0.288256	22.39	19.58	134.8	85	80.2	17.33	25.25	27.09	14121941	1.0028e+07	1.24283e+07	5.03061e+06	8.53386e+06	8.09621e+06	5.51925e+06	3.31876e+06	3.39859e+06	14121941	1.0367e+07	1.43771e+07	5.85997e+06	9.80425e+06	8.91056e+06	8.40202e+06	1.03588e+07	5.9131e+06	1
Q8NFW8	N-acylneuraminate cytidylyltransferase OS=Homo sapiens OX=9606 GN=CMAS PE=1 SV=2	0	36.782	24	8	111	8	434	48.3	7.93	45.45	8	0	0.653	1.331	0.433083	0.288421	30.23	28.74	85.8	154.4	59.8	42.12	20.33	6.48	3.19198e+06	6.97048e+06	6.93751e+06	1.1142e+07	11689237	8230901	3.59289e+06	1.5449e+06	2.88838e+06	3.19198e+06	7.20613e+06	8.02532e+06	1.29789e+07	1.34294e+07	9.0588e+06	5.46951e+06	4.82206e+06	5.02542e+06	1
Q8TDI0	Chromodomain-helicase-DNA-binding protein 5 OS=Homo sapiens OX=9606 GN=CHD5 PE=1 SV=1	0	36.764	6	8	122	0	1954	222.9	6.15	48.92	8	0																															0
P25054	Adenomatous polyposis coli protein OS=Homo sapiens OX=9606 GN=APC PE=1 SV=2	0	36.747	5	10	79	10	2843	311.5	7.8	20.49	10	0	2.258	0.637	0.090398	0.365139	29.69	37.45	100.6	53	146.4	31.16		49.47	1.0939e+06	1.59465e+06	1.81298e+06		755513		1.57473e+06	1.36388e+06	921832	1.0939e+06	1.64856e+06	2.09726e+06		867983		2.39722e+06	4.25705e+06	1.60387e+06	1
O43615	Mitochondrial import inner membrane translocase subunit TIM44 OS=Homo sapiens OX=9606 GN=TIMM44 PE=1 SV=2	0	36.722	25	10	100	10	452	51.3	8.32	30.38	10	0	1.159	1.04	0.966249	0.945108	19.37	18.13	110.5	88.4	101.1	13.81	7.68	5.74	5.3249e+06	6.78896e+06	5.61574e+06	3.8951e+06	4.52663e+06	4.72408e+06	3903413	2.02236e+06	3235289	5.3249e+06	7.01847e+06	6.49629e+06	4.53725e+06	5.20049e+06	5.19925e+06	5.94222e+06	6.31237e+06	5.62898e+06	1
Q5T749	Keratinocyte proline-rich protein OS=Homo sapiens OX=9606 GN=KPRP PE=1 SV=1	0	36.678	20	7	24	7	579	64.1	8.27	6.3	7	0	100	1.004	1.5566e-16	0.966179		56.95	182.2		117.8	57.45		95.89	1.67671e+06		3.43275e+06				850743	2.235e+06	959456	1.67671e+06		3.97101e+06				1.2951e+06	6.97606e+06	1.66933e+06	1
Q9UNX3	Ribosomal protein uL24-like OS=Homo sapiens OX=9606 GN=RPL26L1 PE=1 SV=1	0	36.657	45	9	476	1	145	17.2	10.55	243.64	9	0	1.378	0.951	0.867246	0.98575	10.95	14.37	113.9	78	108.2	8.45	3.97	6.99	1.26696e+07	1.05525e+07	1.0967e+07	7.3397e+06	8.01493e+06	7.88188e+06	8.76479e+06	3.85533e+06	6.73089e+06	1.26696e+07	1.09093e+07	1.26866e+07	8.54975e+06	9.20807e+06	8.67467e+06	1.33427e+07	1.20336e+07	1.17109e+07	1
Q86XP3	ATP-dependent RNA helicase DDX42 OS=Homo sapiens OX=9606 GN=DDX42 PE=1 SV=1	0	36.652	14	10	98	10	938	102.9	7.02	32.64	10	0	0.921	0.721	0.930685	0.602498	17.26	30.15	101.1	87.4	111.6	40.39	8.85	30.91	4.88092e+06	2.22193e+06	2.49262e+06	2139936	2.02069e+06	2512162	1.65516e+06	1.47298e+06	1.82986e+06	4.88092e+06	2.29705e+06	2.88346e+06	2.49273e+06	2.3215e+06	2.76485e+06	2.51966e+06	4.59758e+06	3.18372e+06	1
O95613	Pericentrin OS=Homo sapiens OX=9606 GN=PCNT PE=1 SV=4	0	36.626	4	13	69	13	3336	377.8	5.55	18.26	13	0	1.521	0.926	0.718836	0.994006	13.65	19.91	221	29	50	65.03	140.49	124.39	3.58433e+06	3.75969e+06	591813	5.48829e+06	409833	408974	4.11409e+06	259644	367948	3.58433e+06	3.8868e+06	684610	6.3931e+06	470843	450111	6.26294e+06	810422	640182	1
O94925	Glutaminase kidney isoform, mitochondrial OS=Homo sapiens OX=9606 GN=GLS PE=1 SV=1	0	36.615	16	8	75	8	669	73.4	7.77	28.13	8	0	0.833	0.734	0.859758	0.515706	28.03	28.17	92.4	97.9	109.7	37.3	6.12	11.22	5.21209e+06	1.06621e+07	6.37916e+06	6.7134e+06	6.41904e+06	7.57177e+06	5.05814e+06	3.09189e+06	5.03896e+06	5.21209e+06	1.10225e+07	7.37941e+06	7.82019e+06	7.37461e+06	8.33337e+06	7.70007e+06	9.65066e+06	8.76714e+06	1
P61221	ATP-binding cassette sub-family E member 1 OS=Homo sapiens OX=9606 GN=ABCE1 PE=1 SV=1	0	36.602	15	9	148	9	599	67.3	8.34	50.02	9	0	1.042	1.226	0.98879	0.59626	22.73	23.6	103.8	109.5	86.7	12.23	6.22	8.01	1.20978e+07	9.60461e+06	8.45572e+06	8.99477e+06	8.69991e+06	1.02647e+07	6.24052e+06	2.65797e+06	4.76504e+06	1.20978e+07	9.92931e+06	9.78159e+06	1.04777e+07	9.99503e+06	1.12972e+07	9.50002e+06	8.29627e+06	8.29056e+06	1
Q68E01	Integrator complex subunit 3 OS=Homo sapiens OX=9606 GN=INTS3 PE=1 SV=1	0	36.598	13	8	106	8	1043	118	5.8	31.05	8	0	1.015	1.308	0.970936	0.374835	21.31	41.7	110.9	108	81.1	3.05	15.98	27.54	4.09998e+06	3.90638e+06	3.3407e+06	2.74891e+06	3.85277e+06	3.57283e+06	1.93873e+06	602603	1.90974e+06	4.09998e+06	4.03844e+06	3.86453e+06	3.2021e+06	4.42632e+06	3.9322e+06	2.95136e+06	1.88089e+06	3.3227e+06	1
Q15418	Ribosomal protein S6 kinase alpha-1 OS=Homo sapiens OX=9606 GN=RPS6KA1 PE=1 SV=2	0	36.476	15	9	72	7	735	82.7	7.83	24.23	9	2	0.823	0.97	0.845067	0.999684	28.78	18.73	98.1	105.8	96.1	2.87	63.06	6.02	1.16317e+07	1.18735e+07	1.05184e+07	1.08521e+07	3.04662e+07	1.19225e+07	7.41831e+06	4.07924e+06	6.85005e+06	1.16317e+07	1.2275e+07	1.21677e+07	1.26412e+07	3.50015e+07	1.31217e+07	1.1293e+07	1.27325e+07	1.19182e+07	1
Q5JTW2	Centrosomal protein of 78 kDa OS=Homo sapiens OX=9606 GN=CEP78 PE=1 SV=1	0	36.339	15	9	93	9	689	76.3	8.18	29.85	9	0	1.174	1.22	0.965964	0.649228	24.19	24.33	141.3	79.8	78.9	6.08	56.36	16.63	2.91996e+06	3.01993e+06	2.39113e+06		2.18928e+06	982783	804360	540072	936830	2.91996e+06	3.12203e+06	2.76606e+06		2.51519e+06	1.08164e+06	1.22449e+06	1.68572e+06	1.62996e+06	1
Q7Z4F1	Low-density lipoprotein receptor-related protein 10 OS=Homo sapiens OX=9606 GN=LRP10 PE=1 SV=2	0	36.33	22	8	170	8	713	76.1	5.52	65.44	8	0	0.945	1.001	0.93889	0.992023	14.35	25.05	92.2	107.4	100.4	27.39	21	35.16	3.06437e+07	2.00459e+07	1.61567e+07	27551134	1.88435e+07	2.19499e+07	1.48279e+07	3.8217e+06	1.44135e+07	3.06437e+07	2.07236e+07	1.86901e+07	3.20933e+07	2.16486e+07	2.41577e+07	2.25727e+07	1.19286e+07	2.50777e+07	1
Q63ZY3	KN motif and ankyrin repeat domain-containing protein 2 OS=Homo sapiens OX=9606 GN=KANK2 PE=1 SV=1	0	36.268	13	9	127	9	851	91.1	5.63	53.96	9	0	1.193	0.909	0.965964	0.960962	18.73	28.37	99.6	86.8	113.6	11.23	8.66	22.36	5.80914e+06	7.02651e+06	5.55847e+06	4.81068e+06	4.44865e+06	5.5251e+06	4.81934e+06	2.71963e+06	3.08363e+06	5.80914e+06	7.26406e+06	6.43005e+06	5.60378e+06	5.1109e+06	6.08084e+06	7.33653e+06	8.48873e+06	5.36511e+06	1
O00231	26S proteasome non-ATPase regulatory subunit 11 OS=Homo sapiens OX=9606 GN=PSMD11 PE=1 SV=3	0	36.266	24	9	147	9	422	47.4	6.48	56.36	9	0	0.934	1.004	0.932471	0.979065	21.53	26.11	88.3	99.9	111.8	21.77	18.54	23.44	8.04553e+06	1.16083e+07	7628933	6470828	8.69285e+06	9.94967e+06	4.94177e+06	3.57873e+06	6.92808e+06	8.04553e+06	1.20008e+07	8.82516e+06	7.53763e+06	9.98692e+06	1.09504e+07	7.52292e+06	1.11702e+07	1.2054e+07	1
Q15678	Tyrosine-protein phosphatase non-receptor type 14 OS=Homo sapiens OX=9606 GN=PTPN14 PE=1 SV=2	0	36.246	13	10	94	10	1187	135.2	8.31	25.05	10	0	0.897	0.767	0.917737	0.700606	9.9	23.73	90.5	78.1	131.4	19.81	25.23	14.5	5.0995e+06	3293379	3.78406e+06	4.34907e+06	3.29058e+06	2.80557e+06	3.43826e+06	2.2465e+06	3.65301e+06	5.0995e+06	3.40472e+06	4.3774e+06	5.06607e+06	3.78043e+06	3.08777e+06	5.23411e+06	7.01198e+06	6.35577e+06	1
Q9BW19	Kinesin-like protein KIFC1 OS=Homo sapiens OX=9606 GN=KIFC1 PE=1 SV=2	0	36.238	16	9	79	9	673	73.7	8.98	22.74	9	0	100	0.998	1.5566e-16	0.970447		13.78	154.8		145.2	11.03		4.51	3.35328e+06	3.95995e+06	3527775				2.51603e+06	1.29248e+06	2.1201e+06	3.35328e+06	4.09382e+06	4.08093e+06				3.83019e+06	4.03421e+06	3.6887e+06	1
P51149	Ras-related protein Rab-7a OS=Homo sapiens OX=9606 GN=RAB7A PE=1 SV=1	0	36.23	48	9	221	9	207	23.5	6.7	98.16	9	0	0.887	0.905	0.907599	0.929972	19.33	15.72	95.5	113.9	90.6	5.46	7.78	7.81	4.95853e+07	5.24692e+07	4.25883e+07	5.08036e+07	5.87407e+07	5.36976e+07	3.49933e+07	1.48385e+07	2.70552e+07	4.95853e+07	5.42431e+07	4.92662e+07	5.91792e+07	6.74851e+07	5.90988e+07	5.32708e+07	4.63152e+07	4.70725e+07	1
O14981	TATA-binding protein-associated factor 172 OS=Homo sapiens OX=9606 GN=BTAF1 PE=1 SV=2	0	36.211	7	11	96	11	1849	206.8	6.52	26.54	11	0	1.106	1.153	0.985529	0.860198	34.05	37.47	118	95.6	86.4	26.62	5.2	9.72	2.41922e+06	1.63292e+06	1.27501e+06	1.17431e+06	1.2296e+06	1.15835e+06	812534	410466	610312	2.41922e+06	1.68812e+06	1.47494e+06	1.36792e+06	1.41265e+06	1.27486e+06	1.23693e+06	1.28118e+06	1.06186e+06	1
[truncated: 5,360 more rows]
