# Supplementary material for: RCN1 couple KIF14 and promotes the malignant progression of cervical cancer via the PI3K-mTOR pathway
Source: Research Square preprint supplement (doi:10.21203/rs.3.rs-6303169/v1), 2025-05-05
Supplement: Supplementary file 2 [file 34f5f63268369752a59e138e.xlsx]

## Sheet: proteinGroups
Protein IDs	Majority protein IDs	Peptide counts (all)	Peptide counts (razor+unique)	Peptide counts (unique)	Fasta headers	Number of proteins	Peptides	Razor + unique peptides	Unique peptides	Peptides Adeno_1	Peptides Adeno_2	Peptides Adeno_3	Peptides Adeno_4	Peptides Adeno_5	Peptides Adeno_6	Peptides Contrl_1	Peptides Contrl_2	Peptides Contrl_3	Peptides Contrl_4	Peptides Contrl_5	Peptides Contrl_6	Peptides Squa_1	Peptides Squa_2	Peptides Squa_3	Peptides Squa_4	Peptides Squa_5	Peptides Squa_6	Razor + unique peptides Adeno_1	Razor + unique peptides Adeno_2	Razor + unique peptides Adeno_3	Razor + unique peptides Adeno_4	Razor + unique peptides Adeno_5	Razor + unique peptides Adeno_6	Razor + unique peptides Contrl_1	Razor + unique peptides Contrl_2	Razor + unique peptides Contrl_3	Razor + unique peptides Contrl_4	Razor + unique peptides Contrl_5	Razor + unique peptides Contrl_6	Razor + unique peptides Squa_1	Razor + unique peptides Squa_2	Razor + unique peptides Squa_3	Razor + unique peptides Squa_4	Razor + unique peptides Squa_5	Razor + unique peptides Squa_6	Unique peptides Adeno_1	Unique peptides Adeno_2	Unique peptides Adeno_3	Unique peptides Adeno_4
sp|A0A075B6I0|LV861_HUMAN	sp|A0A075B6I0|LV861_HUMAN	2	2	2	sp|A0A075B6I0|LV861_HUMAN Immunoglobulin lambda variable 8-61 OS=Homo sapiens OX=9606 GN=IGLV8-61 PE=3 SV=7	1	2	2	2	0	0	0	0	0	0	2	1	2	0	1	1	0	0	0	0	0	0	0	0	0	0	0	0	2	1	2	0	1	1	0	0	0	0	0	0	0	0	0	0
sp|A0A075B6K4|LV310_HUMAN	sp|A0A075B6K4|LV310_HUMAN	4	3	1	sp|A0A075B6K4|LV310_HUMAN Immunoglobulin lambda variable 3-10 OS=Homo sapiens OX=9606 GN=IGLV3-10 PE=3 SV=2	1	4	3	1	0	0	0	0	0	0	1	3	3	2	2	3	0	1	0	0	0	0	0	0	0	0	0	0	1	2	2	2	2	3	0	1	0	0	0	0	0	0	0	0
sp|A0A075B6K5|LV39_HUMAN;sp|P80748|LV321_HUMAN	sp|A0A075B6K5|LV39_HUMAN	5;2	5;2	4;1	sp|A0A075B6K5|LV39_HUMAN Immunoglobulin lambda variable 3-9 OS=Homo sapiens OX=9606 GN=IGLV3-9 PE=3 SV=1	2	5	5	4	1	1	1	1	1	1	3	4	4	3	3	3	1	1	1	2	1	1	1	1	1	1	1	1	3	4	4	3	3	3	1	1	1	2	1	1	1	1	1	1
sp|A0A075B6Q5|HV364_HUMAN	sp|A0A075B6Q5|HV364_HUMAN	1	1	1	sp|A0A075B6Q5|HV364_HUMAN Immunoglobulin heavy variable 3-64 OS=Homo sapiens OX=9606 GN=IGHV3-64 PE=3 SV=1	1	1	1	1	0	0	0	0	0	0	0	1	0	1	1	1	0	0	0	0	0	0	0	0	0	0	0	0	0	1	0	1	1	1	0	0	0	0	0	0	0	0	0	0
sp|A0A0A0MS15|HV349_HUMAN	sp|A0A0A0MS15|HV349_HUMAN	2	2	1	sp|A0A0A0MS15|HV349_HUMAN Immunoglobulin heavy variable 3-49 OS=Homo sapiens OX=9606 GN=IGHV3-49 PE=3 SV=1	1	2	2	1	1	1	1	1	1	1	2	2	2	2	2	2	0	0	0	0	0	0	1	1	1	1	1	1	2	2	2	2	2	2	0	0	0	0	0	0	1	1	1	1
sp|A0A0A0MT36|KVD21_HUMAN;sp|A0A0C4DH26|KVD41_HUMAN	sp|A0A0A0MT36|KVD21_HUMAN;sp|A0A0C4DH26|KVD41_HUMAN	1;1	1;1	1;1	sp|A0A0A0MT36|KVD21_HUMAN Immunoglobulin kappa variable 6D-21 OS=Homo sapiens OX=9606 GN=IGKV6D-21 PE=3 SV=1;sp|A0A0C4DH26|KVD41_HUMAN Probable non-functional immunoglobulin kappa variable 6D-41 OS=Homo sapiens OX=9606 GN=IGKV6D-41 PE=1 SV=1	2	1	1	1	0	0	0	0	0	0	1	1	1	1	1	1	0	0	0	0	0	0	0	0	0	0	0	0	1	1	1	1	1	1	0	0	0	0	0	0	0	0	0	0
sp|A0A0B4J1V0|HV315_HUMAN	sp|A0A0B4J1V0|HV315_HUMAN	2	1	1	sp|A0A0B4J1V0|HV315_HUMAN Immunoglobulin heavy variable 3-15 OS=Homo sapiens OX=9606 GN=IGHV3-15 PE=3 SV=1	1	2	1	1	1	1	1	1	1	1	2	2	2	2	2	2	0	2	1	1	2	2	0	0	0	0	0	0	1	1	1	1	1	1	0	1	1	0	1	1	0	0	0	0
sp|A0A0B4J1X5|HV374_HUMAN;sp|P01767|HV353_HUMAN;sp|A0A0C4DH42|HV366_HUMAN;sp|A0A0J9YVY3|HV741_HUMAN	sp|A0A0B4J1X5|HV374_HUMAN;sp|P01767|HV353_HUMAN;sp|A0A0C4DH42|HV366_HUMAN	3;2;2;1	1;0;0;0	1;0;0;0	sp|A0A0B4J1X5|HV374_HUMAN Immunoglobulin heavy variable 3-74 OS=Homo sapiens OX=9606 GN=IGHV3-74 PE=3 SV=1;sp|P01767|HV353_HUMAN Immunoglobulin heavy variable 3-53 OS=Homo sapiens OX=9606 GN=IGHV3-53 PE=1 SV=2;sp|A0A0C4DH42|HV366_HUMAN Immunoglobulin heavy	4	3	1	1	3	3	1	2	2	2	3	3	3	3	3	3	2	2	2	1	2	2	1	1	0	0	0	0	1	1	1	1	1	1	0	0	0	0	0	0	1	1	0	0
sp|A0A0B4J1X8|HV343_HUMAN	sp|A0A0B4J1X8|HV343_HUMAN	3	2	2	sp|A0A0B4J1X8|HV343_HUMAN Immunoglobulin heavy variable 3-43 OS=Homo sapiens OX=9606 GN=IGHV3-43 PE=3 SV=1	1	3	2	2	1	1	1	1	1	1	3	2	2	2	2	2	0	1	0	1	1	0	0	0	0	0	0	0	2	1	1	1	1	1	0	0	0	0	0	0	0	0	0	0
sp|A0A0B4J1Y8|LV949_HUMAN	sp|A0A0B4J1Y8|LV949_HUMAN	1	1	1	sp|A0A0B4J1Y8|LV949_HUMAN Immunoglobulin lambda variable 9-49 OS=Homo sapiens OX=9606 GN=IGLV9-49 PE=1 SV=1	1	1	1	1	0	0	0	0	0	0	1	0	0	1	1	1	0	0	0	0	0	0	0	0	0	0	0	0	1	0	0	1	1	1	0	0	0	0	0	0	0	0	0	0
sp|A0A0B4J1Y9|HV372_HUMAN	sp|A0A0B4J1Y9|HV372_HUMAN	3	3	2	sp|A0A0B4J1Y9|HV372_HUMAN Immunoglobulin heavy variable 3-72 OS=Homo sapiens OX=9606 GN=IGHV3-72 PE=3 SV=1	1	3	3	2	2	1	2	2	2	1	2	3	2	3	3	3	1	2	1	2	1	1	2	1	2	2	2	1	2	3	2	3	3	3	1	2	1	2	1	1	1	0	1	1
sp|A0A0C4DH29|HV103_HUMAN;sp|A0A0B4J2H0|HV69D_HUMAN	sp|A0A0C4DH29|HV103_HUMAN;sp|A0A0B4J2H0|HV69D_HUMAN	2;1	1;0	1;0	sp|A0A0C4DH29|HV103_HUMAN Immunoglobulin heavy variable 1-3 OS=Homo sapiens OX=9606 GN=IGHV1-3 PE=3 SV=1;sp|A0A0B4J2H0|HV69D_HUMAN Immunoglobulin heavy variable 1-69D OS=Homo sapiens OX=9606 GN=IGHV1-69D PE=1 SV=1	2	2	1	1	1	1	1	1	1	1	2	2	2	2	2	2	1	1	1	1	1	1	0	0	0	0	0	0	1	1	1	1	1	1	0	0	0	0	0	0	0	0	0	0
sp|A0A0C4DH34|HV428_HUMAN	sp|A0A0C4DH34|HV428_HUMAN	2	2	2	sp|A0A0C4DH34|HV428_HUMAN Immunoglobulin heavy variable 4-28 OS=Homo sapiens OX=9606 GN=IGHV4-28 PE=3 SV=1	1	2	2	2	0	0	0	0	1	0	1	1	1	1	1	1	0	1	0	0	0	0	0	0	0	0	1	0	1	1	1	1	1	1	0	1	0	0	0	0	0	0	0	0
sp|A0A0C4DH35|HV335_HUMAN	sp|A0A0C4DH35|HV335_HUMAN	1	1	1	sp|A0A0C4DH35|HV335_HUMAN Probable non-functional immunoglobulin heavy variable 3-35 OS=Homo sapiens OX=9606 GN=IGHV3-35 PE=1 SV=1	1	1	1	1	0	0	0	0	0	0	1	1	1	1	1	1	1	1	0	1	1	1	0	0	0	0	0	0	1	1	1	1	1	1	1	1	0	1	1	1	0	0	0	0
sp|A0A0C4DH36|HV338_HUMAN	sp|A0A0C4DH36|HV338_HUMAN	1	1	1	sp|A0A0C4DH36|HV338_HUMAN Probable non-functional immunoglobulin heavy variable 3-38 OS=Homo sapiens OX=9606 GN=IGHV3-38 PE=1 SV=1	1	1	1	1	0	0	0	0	0	0	1	1	1	1	1	1	0	0	0	0	0	0	0	0	0	0	0	0	1	1	1	1	1	1	0	0	0	0	0	0	0	0	0	0
sp|A0A0C4DH38|HV551_HUMAN;sp|A0A0J9YXX1|HV5X1_HUMAN	sp|A0A0C4DH38|HV551_HUMAN;sp|A0A0J9YXX1|HV5X1_HUMAN	4;2	4;2	4;2	sp|A0A0C4DH38|HV551_HUMAN Immunoglobulin heavy variable 5-51 OS=Homo sapiens OX=9606 GN=IGHV5-51 PE=3 SV=1;sp|A0A0J9YXX1|HV5X1_HUMAN Immunoglobulin heavy variable 5-10-1 OS=Homo sapiens OX=9606 GN=IGHV5-10-1 PE=3 SV=1	2	4	4	4	1	0	1	0	1	1	4	4	4	4	4	4	1	2	1	1	2	2	1	0	1	0	1	1	4	4	4	4	4	4	1	2	1	1	2	2	1	0	1	0
sp|A0A0C4DH67|KV108_HUMAN;sp|A0A0C4DH69|KV109_HUMAN;sp|A0A075B6S5|KV127_HUMAN	sp|A0A0C4DH67|KV108_HUMAN;sp|A0A0C4DH69|KV109_HUMAN;sp|A0A075B6S5|KV127_HUMAN	1;1;1	1;1;1	1;1;1	sp|A0A0C4DH67|KV108_HUMAN Immunoglobulin kappa variable 1-8 OS=Homo sapiens OX=9606 GN=IGKV1-8 PE=3 SV=1;sp|A0A0C4DH69|KV109_HUMAN Immunoglobulin kappa variable 1-9 OS=Homo sapiens OX=9606 GN=IGKV1-9 PE=3 SV=1;sp|A0A075B6S5|KV127_HUMAN Immunoglobulin kappa	3	1	1	1	0	0	0	0	0	0	1	1	1	1	0	0	0	0	0	0	0	0	0	0	0	0	0	0	1	1	1	1	0	0	0	0	0	0	0	0	0	0	0	0
sp|A0A0C4DH68|KV224_HUMAN;sp|A0A075B6R9|KVD24_HUMAN	sp|A0A0C4DH68|KV224_HUMAN;sp|A0A075B6R9|KVD24_HUMAN	2;2	1;1	1;1	sp|A0A0C4DH68|KV224_HUMAN Immunoglobulin kappa variable 2-24 OS=Homo sapiens OX=9606 GN=IGKV2-24 PE=3 SV=1;sp|A0A075B6R9|KVD24_HUMAN Probable non-functional immunoglobulin kappa variable 2D-24 OS=Homo sapiens OX=9606 GN=IGKV2D-24 PE=1 SV=1	2	2	1	1	1	0	0	0	0	1	1	1	1	2	2	2	0	0	0	0	0	0	0	0	0	0	0	1	1	1	1	1	1	1	0	0	0	0	0	0	0	0	0	0
sp|A0A0J9YX35|HV64D_HUMAN	sp|A0A0J9YX35|HV64D_HUMAN	1	1	1	sp|A0A0J9YX35|HV64D_HUMAN Immunoglobulin heavy variable 3-64D OS=Homo sapiens OX=9606 GN=IGHV3-64D PE=3 SV=1	1	1	1	1	0	0	1	1	0	1	1	1	1	1	1	1	0	1	0	0	0	0	0	0	1	1	0	1	1	1	1	1	1	1	0	1	0	0	0	0	0	0	1	1
sp|A0AV96|RBM47_HUMAN	sp|A0AV96|RBM47_HUMAN	3	3	3	sp|A0AV96|RBM47_HUMAN RNA-binding protein 47 OS=Homo sapiens OX=9606 GN=RBM47 PE=1 SV=2	1	3	3	3	1	3	1	2	2	3	0	0	0	0	0	0	2	2	1	2	2	1	1	3	1	2	2	3	0	0	0	0	0	0	2	2	1	2	2	1	1	3	1	2
sp|A0AVT1|UBA6_HUMAN	sp|A0AVT1|UBA6_HUMAN	27	27	27	sp|A0AVT1|UBA6_HUMAN Ubiquitin-like modifier-activating enzyme 6 OS=Homo sapiens OX=9606 GN=UBA6 PE=1 SV=1	1	27	27	27	1	2	3	1	2	2	2	3	1	2	0	2	17	17	17	18	17	19	1	2	3	1	2	2	2	3	1	2	0	2	17	17	17	18	17	19	1	2	3	1
sp|A0FGR8|ESYT2_HUMAN	sp|A0FGR8|ESYT2_HUMAN	6	6	6	sp|A0FGR8|ESYT2_HUMAN Extended synaptotagmin-2 OS=Homo sapiens OX=9606 GN=ESYT2 PE=1 SV=1	1	6	6	6	3	2	2	3	3	1	0	0	1	1	0	0	0	0	0	0	0	0	3	2	2	3	3	1	0	0	1	1	0	0	0	0	0	0	0	0	3	2	2	3
sp|A0MZ66|SHOT1_HUMAN	sp|A0MZ66|SHOT1_HUMAN	7	7	7	sp|A0MZ66|SHOT1_HUMAN Shootin-1 OS=Homo sapiens OX=9606 GN=SHTN1 PE=1 SV=4	1	7	7	7	4	4	4	3	5	2	0	0	0	0	0	0	2	2	1	1	2	2	4	4	4	3	5	2	0	0	0	0	0	0	2	2	1	1	2	2	4	4	4	3
sp|A1A5D9|BICL2_HUMAN	sp|A1A5D9|BICL2_HUMAN	1	1	1	sp|A1A5D9|BICL2_HUMAN BICD family-like cargo adapter 2 OS=Homo sapiens OX=9606 GN=BICDL2 PE=1 SV=2	1	1	1	1	0	0	0	0	0	0	1	1	0	0	0	0	0	0	0	0	0	0	0	0	0	0	0	0	1	1	0	0	0	0	0	0	0	0	0	0	0	0	0	0
sp|A1L0T0|HACL2_HUMAN	sp|A1L0T0|HACL2_HUMAN	7	7	7	sp|A1L0T0|HACL2_HUMAN 2-hydroxyacyl-CoA lyase 2 OS=Homo sapiens OX=9606 GN=ILVBL PE=1 SV=2	1	7	7	7	3	2	3	3	3	4	0	1	1	0	0	1	3	3	3	3	3	3	3	2	3	3	3	4	0	1	1	0	0	1	3	3	3	3	3	3	3	2	3	3
sp|A1X283|SPD2B_HUMAN	sp|A1X283|SPD2B_HUMAN	1	1	1	sp|A1X283|SPD2B_HUMAN SH3 and PX domain-containing protein 2B OS=Homo sapiens OX=9606 GN=SH3PXD2B PE=1 SV=3	1	1	1	1	1	0	0	0	0	1	0	0	0	0	0	0	0	0	0	0	0	0	1	0	0	0	0	1	0	0	0	0	0	0	0	0	0	0	0	0	1	0	0	0
sp|A2NJV5|KV229_HUMAN;sp|A0A075B6S2|KVD29_HUMAN;sp|A0A0A0MRZ7|KVD26_HUMAN;sp|P06310|KV230_HUMAN;sp|A0A075B6S6|KVD30_HUMAN	sp|A2NJV5|KV229_HUMAN;sp|A0A075B6S2|KVD29_HUMAN;sp|A0A0A0MRZ7|KVD26_HUMAN	3;3;2;1;1	3;3;2;1;1	1;1;0;0;0	sp|A2NJV5|KV229_HUMAN Immunoglobulin kappa variable 2-29 OS=Homo sapiens OX=9606 GN=IGKV2-29 PE=3 SV=2;sp|A0A075B6S2|KVD29_HUMAN Immunoglobulin kappa variable 2D-29 OS=Homo sapiens OX=9606 GN=IGKV2D-29 PE=3 SV=1;sp|A0A0A0MRZ7|KVD26_HUMAN Immunoglobulin kap	5	3	3	1	2	1	1	1	1	1	1	2	1	2	2	3	1	1	1	1	1	1	2	1	1	1	1	1	1	2	1	2	2	3	1	1	1	1	1	1	0	0	0	0
sp|A2RRP1|NBAS_HUMAN	sp|A2RRP1|NBAS_HUMAN	1	1	1	sp|A2RRP1|NBAS_HUMAN Neuroblastoma-amplified sequence OS=Homo sapiens OX=9606 GN=NBAS PE=1 SV=2	1	1	1	1	0	0	0	1	0	0	0	0	0	0	0	0	0	0	0	0	0	0	0	0	0	1	0	0	0	0	0	0	0	0	0	0	0	0	0	0	0	0	0	1
sp|A4D1P6|WDR91_HUMAN	sp|A4D1P6|WDR91_HUMAN	3	3	3	sp|A4D1P6|WDR91_HUMAN WD repeat-containing protein 91 OS=Homo sapiens OX=9606 GN=WDR91 PE=1 SV=2	1	3	3	3	2	1	3	1	1	0	0	0	0	0	0	0	1	0	0	0	0	0	2	1	3	1	1	0	0	0	0	0	0	0	1	0	0	0	0	0	2	1	3	1
sp|A5YKK6|CNOT1_HUMAN	sp|A5YKK6|CNOT1_HUMAN	9	9	9	sp|A5YKK6|CNOT1_HUMAN CCR4-NOT transcription complex subunit 1 OS=Homo sapiens OX=9606 GN=CNOT1 PE=1 SV=2	1	9	9	9	5	2	5	4	5	5	0	0	0	0	0	1	3	2	6	4	4	6	5	2	5	4	5	5	0	0	0	0	0	1	3	2	6	4	4	6	5	2	5	4
sp|A6ND36|FA83G_HUMAN	sp|A6ND36|FA83G_HUMAN	1	1	1	sp|A6ND36|FA83G_HUMAN Protein FAM83G OS=Homo sapiens OX=9606 GN=FAM83G PE=1 SV=2	1	1	1	1	0	0	0	0	0	0	0	0	0	0	0	0	0	0	1	0	0	0	0	0	0	0	0	0	0	0	0	0	0	0	0	0	1	0	0	0	0	0	0	0
sp|A6NDG6|PGP_HUMAN	sp|A6NDG6|PGP_HUMAN	3	3	3	sp|A6NDG6|PGP_HUMAN Glycerol-3-phosphate phosphatase OS=Homo sapiens OX=9606 GN=PGP PE=1 SV=1	1	3	3	3	2	1	1	1	1	1	0	0	0	0	0	0	1	2	1	1	1	0	2	1	1	1	1	1	0	0	0	0	0	0	1	2	1	1	1	0	2	1	1	1
sp|A6NDU8|CE051_HUMAN	sp|A6NDU8|CE051_HUMAN	1	1	1	sp|A6NDU8|CE051_HUMAN UPF0600 protein C5orf51 OS=Homo sapiens OX=9606 GN=C5orf51 PE=1 SV=1	1	1	1	1	1	1	1	1	1	1	0	0	0	0	0	0	1	1	1	1	1	1	1	1	1	1	1	1	0	0	0	0	0	0	1	1	1	1	1	1	1	1	1	1
sp|A6NHL2|TBAL3_HUMAN	sp|A6NHL2|TBAL3_HUMAN	5	1	1	sp|A6NHL2|TBAL3_HUMAN Tubulin alpha chain-like 3 OS=Homo sapiens OX=9606 GN=TUBAL3 PE=1 SV=2	1	5	1	1	4	4	4	4	5	5	4	3	3	4	4	3	3	3	3	4	4	4	1	1	1	1	1	1	1	1	1	1	1	1	1	1	1	1	1	1	1	1	1	1
sp|A6NHQ2|FBLL1_HUMAN	sp|A6NHQ2|FBLL1_HUMAN	2	1	1	sp|A6NHQ2|FBLL1_HUMAN rRNA/tRNA 2-O-methyltransferase fibrillarin-like protein 1 OS=Homo sapiens OX=9606 GN=FBLL1 PE=3 SV=2	1	2	1	1	2	2	2	2	2	2	1	1	2	0	1	2	1	1	1	1	1	1	1	1	1	1	1	1	1	0	1	0	1	1	1	1	1	1	1	1	1	1	1	1
sp|A6NHR9|SMHD1_HUMAN	sp|A6NHR9|SMHD1_HUMAN	5	5	5	sp|A6NHR9|SMHD1_HUMAN Structural maintenance of chromosomes flexible hinge domain-containing protein 1 OS=Homo sapiens OX=9606 GN=SMCHD1 PE=1 SV=2	1	5	5	5	0	0	0	1	2	0	0	0	0	0	0	0	3	1	1	0	1	0	0	0	0	1	2	0	0	0	0	0	0	0	3	1	1	0	1	0	0	0	0	1
sp|A8K2U0|A2ML1_HUMAN	sp|A8K2U0|A2ML1_HUMAN	41	41	41	sp|A8K2U0|A2ML1_HUMAN Alpha-2-macroglobulin-like protein 1 OS=Homo sapiens OX=9606 GN=A2ML1 PE=1 SV=3	1	41	41	41	8	8	10	11	10	10	32	33	34	33	32	32	15	11	16	14	12	14	8	8	10	11	10	10	32	33	34	33	32	32	15	11	16	14	12	14	8	8	10	11
sp|A8MWY0|ELAP2_HUMAN	sp|A8MWY0|ELAP2_HUMAN	5	5	5	sp|A8MWY0|ELAP2_HUMAN Endosome/lysosome-associated apoptosis and autophagy regulator family member 2 OS=Homo sapiens OX=9606 GN=ELAPOR2 PE=1 SV=2	1	5	5	5	3	3	3	3	4	3	0	0	0	0	0	0	0	0	0	0	0	0	3	3	3	3	4	3	0	0	0	0	0	0	0	0	0	0	0	0	3	3	3	3
sp|B3EWG6|FM25G_HUMAN;sp|B3EWG5|FM25C_HUMAN;sp|B3EWG3|FM25A_HUMAN	sp|B3EWG6|FM25G_HUMAN;sp|B3EWG5|FM25C_HUMAN;sp|B3EWG3|FM25A_HUMAN	2;2;2	2;2;2	2;2;2	sp|B3EWG6|FM25G_HUMAN Protein FAM25G OS=Homo sapiens OX=9606 GN=FAM25G PE=3 SV=1;sp|B3EWG5|FM25C_HUMAN Protein FAM25C OS=Homo sapiens OX=9606 GN=FAM25C PE=1 SV=1;sp|B3EWG3|FM25A_HUMAN Protein FAM25A OS=Homo sapiens OX=9606 GN=FAM25A PE=3 SV=1	3	2	2	2	0	0	0	0	0	0	2	2	2	1	2	1	0	0	0	0	0	0	0	0	0	0	0	0	2	2	2	1	2	1	0	0	0	0	0	0	0	0	0	0
sp|B7Z6K7|ZN814_HUMAN	sp|B7Z6K7|ZN814_HUMAN	1	1	1	sp|B7Z6K7|ZN814_HUMAN Zinc finger protein 814 OS=Homo sapiens OX=9606 GN=ZNF814 PE=1 SV=2	1	1	1	1	1	0	0	0	0	0	0	0	0	0	0	0	0	0	0	0	0	0	1	0	0	0	0	0	0	0	0	0	0	0	0	0	0	0	0	0	1	0	0	0
sp|B9A064|IGLL5_HUMAN;sp|P0CG04|IGLC1_HUMAN	sp|B9A064|IGLL5_HUMAN;sp|P0CG04|IGLC1_HUMAN	6;5	6;5	3;2	sp|B9A064|IGLL5_HUMAN Immunoglobulin lambda-like polypeptide 5 OS=Homo sapiens OX=9606 GN=IGLL5 PE=2 SV=2;sp|P0CG04|IGLC1_HUMAN Immunoglobulin lambda constant 1 OS=Homo sapiens OX=9606 GN=IGLC1 PE=1 SV=1	2	6	6	3	5	5	4	4	4	5	6	6	6	5	6	4	5	4	4	6	5	5	5	5	4	4	4	5	6	6	6	5	6	4	5	4	4	6	5	5	2	2	2	2
sp|E9PAV3|NACAM_HUMAN;sp|Q13765|NACA_HUMAN;sp|Q9BZK3|NACP4_HUMAN	sp|E9PAV3|NACAM_HUMAN;sp|Q13765|NACA_HUMAN	5;5;1	5;5;1	5;5;1	sp|E9PAV3|NACAM_HUMAN Nascent polypeptide-associated complex subunit alpha, muscle-specific form OS=Homo sapiens OX=9606 GN=NACA PE=1 SV=1;sp|Q13765|NACA_HUMAN Nascent polypeptide-associated complex subunit alpha OS=Homo sapiens OX=9606 GN=NACA PE=1 SV=1	3	5	5	5	4	5	5	5	5	5	4	4	4	4	4	4	5	5	5	5	5	5	4	5	5	5	5	5	4	4	4	4	4	4	5	5	5	5	5	5	4	5	5	5
sp|L0R6Q1|S35U4_HUMAN	sp|L0R6Q1|S35U4_HUMAN	2	2	2	sp|L0R6Q1|S35U4_HUMAN SLC35A4 upstream open reading frame protein OS=Homo sapiens OX=9606 GN=SLC35A4 PE=3 SV=1	1	2	2	2	1	1	1	1	0	1	1	1	1	1	1	1	1	1	1	1	1	1	1	1	1	1	0	1	1	1	1	1	1	1	1	1	1	1	1	1	1	1	1	1
sp|O00116|ADAS_HUMAN	sp|O00116|ADAS_HUMAN	11	11	11	sp|O00116|ADAS_HUMAN Alkyldihydroxyacetonephosphate synthase, peroxisomal OS=Homo sapiens OX=9606 GN=AGPS PE=1 SV=1	1	11	11	11	7	5	4	5	6	6	0	0	0	0	0	0	2	4	5	3	4	2	7	5	4	5	6	6	0	0	0	0	0	0	2	4	5	3	4	2	7	5	4	5
sp|O00148|DX39A_HUMAN	sp|O00148|DX39A_HUMAN	12	3	3	sp|O00148|DX39A_HUMAN ATP-dependent RNA helicase DDX39A OS=Homo sapiens OX=9606 GN=DDX39A PE=1 SV=2	1	12	3	3	4	6	7	5	6	8	5	6	6	7	7	5	7	9	7	8	8	9	0	0	0	0	0	1	0	0	0	0	0	0	2	2	2	3	2	3	0	0	0	0
sp|O00151|PDLI1_HUMAN	sp|O00151|PDLI1_HUMAN	18	18	18	sp|O00151|PDLI1_HUMAN PDZ and LIM domain protein 1 OS=Homo sapiens OX=9606 GN=PDLIM1 PE=1 SV=4	1	18	18	18	8	7	7	7	8	7	8	9	7	9	9	9	15	13	14	16	15	14	8	7	7	7	8	7	8	9	7	9	9	9	15	13	14	16	15	14	8	7	7	7
sp|O00154|BACH_HUMAN	sp|O00154|BACH_HUMAN	3	3	3	sp|O00154|BACH_HUMAN Cytosolic acyl coenzyme A thioester hydrolase OS=Homo sapiens OX=9606 GN=ACOT7 PE=1 SV=3	1	3	3	3	1	1	1	0	0	1	0	1	0	1	0	0	1	1	0	1	1	2	1	1	1	0	0	1	0	1	0	1	0	0	1	1	0	1	1	2	1	1	1	0
sp|O00159|MYO1C_HUMAN	sp|O00159|MYO1C_HUMAN	26	26	25	sp|O00159|MYO1C_HUMAN Unconventional myosin-Ic OS=Homo sapiens OX=9606 GN=MYO1C PE=1 SV=4	1	26	26	25	6	5	5	6	6	5	16	21	18	15	14	12	10	8	6	9	8	8	6	5	5	6	6	5	16	21	18	15	14	12	10	8	6	9	8	8	6	5	5	6
sp|O00160|MYO1F_HUMAN	sp|O00160|MYO1F_HUMAN	2	1	1	sp|O00160|MYO1F_HUMAN Unconventional myosin-If OS=Homo sapiens OX=9606 GN=MYO1F PE=1 SV=3	1	2	1	1	1	1	1	1	1	1	2	1	1	2	2	1	1	2	2	2	2	1	0	0	0	0	0	0	1	0	0	1	1	0	0	1	1	1	1	0	0	0	0	0
sp|O00161|SNP23_HUMAN	sp|O00161|SNP23_HUMAN	4	4	4	sp|O00161|SNP23_HUMAN Synaptosomal-associated protein 23 OS=Homo sapiens OX=9606 GN=SNAP23 PE=1 SV=1	1	4	4	4	3	3	3	2	1	1	0	0	0	0	0	0	1	1	1	1	1	1	3	3	3	2	1	1	0	0	0	0	0	0	1	1	1	1	1	1	3	3	3	2
sp|O00170|AIP_HUMAN	sp|O00170|AIP_HUMAN	5	5	5	sp|O00170|AIP_HUMAN AH receptor-interacting protein OS=Homo sapiens OX=9606 GN=AIP PE=1 SV=2	1	5	5	5	0	0	0	0	0	0	0	0	0	0	0	0	1	2	3	1	2	1	0	0	0	0	0	0	0	0	0	0	0	0	1	2	3	1	2	1	0	0	0	0
sp|O00178|GTPB1_HUMAN	sp|O00178|GTPB1_HUMAN	4	4	4	sp|O00178|GTPB1_HUMAN GTP-binding protein 1 OS=Homo sapiens OX=9606 GN=GTPBP1 PE=1 SV=3	1	4	4	4	1	2	2	2	0	1	0	0	0	0	0	0	0	0	0	0	1	0	1	2	2	2	0	1	0	0	0	0	0	0	0	0	0	0	1	0	1	2	2	2
sp|O00182|LEG9_HUMAN;sp|Q6DKI2|LEG9C_HUMAN;sp|Q3B8N2|LEG9B_HUMAN	sp|O00182|LEG9_HUMAN;sp|Q6DKI2|LEG9C_HUMAN;sp|Q3B8N2|LEG9B_HUMAN	4;3;3	4;3;3	4;3;3	sp|O00182|LEG9_HUMAN Galectin-9 OS=Homo sapiens OX=9606 GN=LGALS9 PE=1 SV=2;sp|Q6DKI2|LEG9C_HUMAN Galectin-9C OS=Homo sapiens OX=9606 GN=LGALS9C PE=1 SV=2;sp|Q3B8N2|LEG9B_HUMAN Galectin-9B OS=Homo sapiens OX=9606 GN=LGALS9B PE=1 SV=3	3	4	4	4	3	3	3	3	2	3	0	1	0	1	1	1	3	4	4	4	4	4	3	3	3	3	2	3	0	1	0	1	1	1	3	4	4	4	4	4	3	3	3	3
sp|O00186|STXB3_HUMAN	sp|O00186|STXB3_HUMAN	5	5	5	sp|O00186|STXB3_HUMAN Syntaxin-binding protein 3 OS=Homo sapiens OX=9606 GN=STXBP3 PE=1 SV=2	1	5	5	5	2	1	2	2	1	1	2	2	2	0	1	3	1	1	2	1	2	0	2	1	2	2	1	1	2	2	2	0	1	3	1	1	2	1	2	0	2	1	2	2
sp|O00192|ARVC_HUMAN	sp|O00192|ARVC_HUMAN	5	5	5	sp|O00192|ARVC_HUMAN Armadillo repeat protein deleted in velo-cardio-facial syndrome OS=Homo sapiens OX=9606 GN=ARVCF PE=1 SV=1	1	5	5	5	2	2	2	3	3	2	0	0	0	0	0	0	0	0	0	0	0	0	2	2	2	3	3	2	0	0	0	0	0	0	0	0	0	0	0	0	2	2	2	3
sp|O00193|SMAP_HUMAN	sp|O00193|SMAP_HUMAN	1	1	1	sp|O00193|SMAP_HUMAN Small acidic protein OS=Homo sapiens OX=9606 GN=SMAP PE=1 SV=1	1	1	1	1	1	1	1	1	1	1	0	0	0	0	0	0	1	1	1	1	1	1	1	1	1	1	1	1	0	0	0	0	0	0	1	1	1	1	1	1	1	1	1	1
sp|O00194|RB27B_HUMAN	sp|O00194|RB27B_HUMAN	2	1	1	sp|O00194|RB27B_HUMAN Ras-related protein Rab-27B OS=Homo sapiens OX=9606 GN=RAB27B PE=1 SV=4	1	2	1	1	0	0	1	0	0	1	0	0	1	0	1	1	1	1	1	0	1	1	0	0	1	0	0	1	0	0	0	0	0	0	1	1	1	0	1	1	0	0	1	0
sp|O00203|AP3B1_HUMAN;sp|Q13367|AP3B2_HUMAN	sp|O00203|AP3B1_HUMAN	11;1	11;1	11;1	sp|O00203|AP3B1_HUMAN AP-3 complex subunit beta-1 OS=Homo sapiens OX=9606 GN=AP3B1 PE=1 SV=3	2	11	11	11	4	4	2	5	4	3	0	0	0	0	0	0	4	8	6	7	5	8	4	4	2	5	4	3	0	0	0	0	0	0	4	8	6	7	5	8	4	4	2	5
sp|O00204|ST2B1_HUMAN	sp|O00204|ST2B1_HUMAN	4	4	4	sp|O00204|ST2B1_HUMAN Sulfotransferase 2B1 OS=Homo sapiens OX=9606 GN=SULT2B1 PE=1 SV=2	1	4	4	4	1	2	2	0	0	2	1	1	1	1	1	1	3	2	3	1	3	3	1	2	2	0	0	2	1	1	1	1	1	1	3	2	3	1	3	3	1	2	2	0
sp|O00217|NDUS8_HUMAN	sp|O00217|NDUS8_HUMAN	4	4	4	sp|O00217|NDUS8_HUMAN NADH dehydrogenase [ubiquinone] iron-sulfur protein 8, mitochondrial OS=Homo sapiens OX=9606 GN=NDUFS8 PE=1 SV=1	1	4	4	4	2	1	1	1	0	1	2	2	2	1	2	2	1	1	1	1	0	1	2	1	1	1	0	1	2	2	2	1	2	2	1	1	1	1	0	1	2	1	1	1
sp|O00231|PSD11_HUMAN	sp|O00231|PSD11_HUMAN	17	17	17	sp|O00231|PSD11_HUMAN 26S proteasome non-ATPase regulatory subunit 11 OS=Homo sapiens OX=9606 GN=PSMD11 PE=1 SV=3	1	17	17	17	10	13	13	12	14	13	5	5	4	3	4	3	8	8	7	9	8	8	10	13	13	12	14	13	5	5	4	3	4	3	8	8	7	9	8	8	10	13	13	12
sp|O00232|PSD12_HUMAN	sp|O00232|PSD12_HUMAN	14	14	14	sp|O00232|PSD12_HUMAN 26S proteasome non-ATPase regulatory subunit 12 OS=Homo sapiens OX=9606 GN=PSMD12 PE=1 SV=3	1	14	14	14	6	6	7	6	8	7	5	1	2	2	2	4	6	8	7	7	7	7	6	6	7	6	8	7	5	1	2	2	2	4	6	8	7	7	7	7	6	6	7	6
sp|O00233|PSMD9_HUMAN	sp|O00233|PSMD9_HUMAN	7	7	7	sp|O00233|PSMD9_HUMAN 26S proteasome non-ATPase regulatory subunit 9 OS=Homo sapiens OX=9606 GN=PSMD9 PE=1 SV=3	1	7	7	7	1	2	3	2	2	2	3	2	1	1	1	3	3	3	4	4	3	2	1	2	3	2	2	2	3	2	1	1	1	3	3	3	4	4	3	2	1	2	3	2
sp|O00244|ATOX1_HUMAN	sp|O00244|ATOX1_HUMAN	3	3	3	sp|O00244|ATOX1_HUMAN Copper transport protein ATOX1 OS=Homo sapiens OX=9606 GN=ATOX1 PE=1 SV=1	1	3	3	3	3	2	2	3	3	3	2	2	2	2	1	2	2	2	2	2	3	3	3	2	2	3	3	3	2	2	2	2	1	2	2	2	2	2	3	3	3	2	2	3
sp|O00264|PGRC1_HUMAN	sp|O00264|PGRC1_HUMAN	5	5	5	sp|O00264|PGRC1_HUMAN Membrane-associated progesterone receptor component 1 OS=Homo sapiens OX=9606 GN=PGRMC1 PE=1 SV=3	1	5	5	5	4	2	3	3	2	1	1	1	0	0	0	0	1	1	2	1	1	2	4	2	3	3	2	1	1	1	0	0	0	0	1	1	2	1	1	2	4	2	3	3
sp|O00267|SPT5H_HUMAN	sp|O00267|SPT5H_HUMAN	6	6	6	sp|O00267|SPT5H_HUMAN Transcription elongation factor SPT5 OS=Homo sapiens OX=9606 GN=SUPT5H PE=1 SV=1	1	6	6	6	1	0	1	1	0	1	0	0	0	0	0	0	3	4	5	3	4	3	1	0	1	1	0	1	0	0	0	0	0	0	3	4	5	3	4	3	1	0	1	1
sp|O00273|DFFA_HUMAN	sp|O00273|DFFA_HUMAN	3	3	3	sp|O00273|DFFA_HUMAN DNA fragmentation factor subunit alpha OS=Homo sapiens OX=9606 GN=DFFA PE=1 SV=1	1	3	3	3	1	2	2	2	3	1	0	0	1	1	0	0	1	1	1	1	1	1	1	2	2	2	3	1	0	0	1	1	0	0	1	1	1	1	1	1	1	2	2	2
sp|O00291|HIP1_HUMAN	sp|O00291|HIP1_HUMAN	4	4	4	sp|O00291|HIP1_HUMAN Huntingtin-interacting protein 1 OS=Homo sapiens OX=9606 GN=HIP1 PE=1 SV=5	1	4	4	4	2	2	2	2	2	2	0	0	0	0	1	0	1	1	3	2	3	3	2	2	2	2	2	2	0	0	0	0	1	0	1	1	3	2	3	3	2	2	2	2
sp|O00299|CLIC1_HUMAN	sp|O00299|CLIC1_HUMAN	14	14	14	sp|O00299|CLIC1_HUMAN Chloride intracellular channel protein 1 OS=Homo sapiens OX=9606 GN=CLIC1 PE=1 SV=4	1	14	14	14	11	11	11	12	11	11	11	12	12	11	12	11	13	14	14	13	14	14	11	11	11	12	11	11	11	12	12	11	12	11	13	14	14	13	14	14	11	11	11	12
sp|O00303|EIF3F_HUMAN	sp|O00303|EIF3F_HUMAN	4	4	4	sp|O00303|EIF3F_HUMAN Eukaryotic translation initiation factor 3 subunit F OS=Homo sapiens OX=9606 GN=EIF3F PE=1 SV=1	1	4	4	4	3	3	3	3	3	3	3	2	3	3	3	3	3	4	3	4	4	3	3	3	3	3	3	3	3	2	3	3	3	3	3	4	3	4	4	3	3	3	3	3
sp|O00330|ODPX_HUMAN	sp|O00330|ODPX_HUMAN	6	6	6	sp|O00330|ODPX_HUMAN Pyruvate dehydrogenase protein X component, mitochondrial OS=Homo sapiens OX=9606 GN=PDHX PE=1 SV=3	1	6	6	6	1	3	2	1	4	1	1	0	0	0	0	0	0	1	3	0	1	0	1	3	2	1	4	1	1	0	0	0	0	0	0	1	3	0	1	0	1	3	2	1
sp|O00339|MATN2_HUMAN	sp|O00339|MATN2_HUMAN	3	3	3	sp|O00339|MATN2_HUMAN Matrilin-2 OS=Homo sapiens OX=9606 GN=MATN2 PE=1 SV=4	1	3	3	3	0	0	0	0	0	0	2	2	3	2	0	1	0	0	0	0	0	0	0	0	0	0	0	0	2	2	3	2	0	1	0	0	0	0	0	0	0	0	0	0
sp|O00391|QSOX1_HUMAN	sp|O00391|QSOX1_HUMAN	4	4	4	sp|O00391|QSOX1_HUMAN Sulfhydryl oxidase 1 OS=Homo sapiens OX=9606 GN=QSOX1 PE=1 SV=3	1	4	4	4	2	1	1	1	1	1	3	2	3	3	2	2	0	0	0	0	0	0	2	1	1	1	1	1	3	2	3	3	2	2	0	0	0	0	0	0	2	1	1	1
sp|O00410|IPO5_HUMAN;sp|O60518|RNBP6_HUMAN	sp|O00410|IPO5_HUMAN	27;2	27;2	27;2	sp|O00410|IPO5_HUMAN Importin-5 OS=Homo sapiens OX=9606 GN=IPO5 PE=1 SV=4	2	27	27	27	10	10	13	10	13	9	6	6	5	4	6	5	19	18	16	19	20	21	10	10	13	10	13	9	6	6	5	4	6	5	19	18	16	19	20	21	10	10	13	10
sp|O00422|SAP18_HUMAN	sp|O00422|SAP18_HUMAN	3	3	3	sp|O00422|SAP18_HUMAN Histone deacetylase complex subunit SAP18 OS=Homo sapiens OX=9606 GN=SAP18 PE=1 SV=1	1	3	3	3	1	1	0	1	1	1	0	0	0	0	0	0	2	2	3	1	1	1	1	1	0	1	1	1	0	0	0	0	0	0	2	2	3	1	1	1	1	1	0	1
sp|O00423|EMAL1_HUMAN	sp|O00423|EMAL1_HUMAN	1	1	1	sp|O00423|EMAL1_HUMAN Echinoderm microtubule-associated protein-like 1 OS=Homo sapiens OX=9606 GN=EML1 PE=1 SV=3	1	1	1	1	1	1	0	1	0	0	0	0	0	0	0	0	0	0	0	0	0	1	1	1	0	1	0	0	0	0	0	0	0	0	0	0	0	0	0	1	1	1	0	1
sp|O00425|IF2B3_HUMAN	sp|O00425|IF2B3_HUMAN	1	1	1	sp|O00425|IF2B3_HUMAN Insulin-like growth factor 2 mRNA-binding protein 3 OS=Homo sapiens OX=9606 GN=IGF2BP3 PE=1 SV=2	1	1	1	1	1	0	1	1	1	0	0	1	1	1	1	0	1	1	0	1	1	1	1	0	1	1	1	0	0	1	1	1	1	0	1	1	0	1	1	1	1	0	1	1
sp|O00429|DNM1L_HUMAN	sp|O00429|DNM1L_HUMAN	16	16	16	sp|O00429|DNM1L_HUMAN Dynamin-1-like protein OS=Homo sapiens OX=9606 GN=DNM1L PE=1 SV=2	1	16	16	16	8	9	9	6	8	6	3	3	4	4	3	5	12	9	11	11	9	8	8	9	9	6	8	6	3	3	4	4	3	5	12	9	11	11	9	8	8	9	9	6
sp|O00442|RTCA_HUMAN	sp|O00442|RTCA_HUMAN	8	8	8	sp|O00442|RTCA_HUMAN RNA 3-terminal phosphate cyclase OS=Homo sapiens OX=9606 GN=RTCA PE=1 SV=1	1	8	8	8	4	2	3	3	5	2	3	1	1	1	2	2	1	2	2	2	2	2	4	2	3	3	5	2	3	1	1	1	2	2	1	2	2	2	2	2	4	2	3	3
sp|O00461|GOLI4_HUMAN	sp|O00461|GOLI4_HUMAN	6	6	6	sp|O00461|GOLI4_HUMAN Golgi integral membrane protein 4 OS=Homo sapiens OX=9606 GN=GOLIM4 PE=1 SV=1	1	6	6	6	4	4	5	4	5	4	0	0	0	0	0	0	0	1	0	1	1	1	4	4	5	4	5	4	0	0	0	0	0	0	0	1	0	1	1	1	4	4	5	4
sp|O00462|MANBA_HUMAN	sp|O00462|MANBA_HUMAN	1	1	1	sp|O00462|MANBA_HUMAN Beta-mannosidase OS=Homo sapiens OX=9606 GN=MANBA PE=1 SV=3	1	1	1	1	1	1	0	1	1	1	0	0	0	0	0	0	0	0	0	0	0	0	1	1	0	1	1	1	0	0	0	0	0	0	0	0	0	0	0	0	1	1	0	1
sp|O00468|AGRIN_HUMAN	sp|O00468|AGRIN_HUMAN	11	11	11	sp|O00468|AGRIN_HUMAN Agrin OS=Homo sapiens OX=9606 GN=AGRN PE=1 SV=6	1	11	11	11	5	4	4	6	6	6	1	1	1	1	1	1	1	2	3	4	2	2	5	4	4	6	6	6	1	1	1	1	1	1	1	2	3	4	2	2	5	4	4	6
sp|O00483|NDUA4_HUMAN	sp|O00483|NDUA4_HUMAN	3	3	3	sp|O00483|NDUA4_HUMAN Cytochrome c oxidase subunit NDUFA4 OS=Homo sapiens OX=9606 GN=NDUFA4 PE=1 SV=1	1	3	3	3	1	2	1	1	1	2	0	0	0	0	0	0	1	1	1	1	1	1	1	2	1	1	1	2	0	0	0	0	0	0	1	1	1	1	1	1	1	2	1	1
sp|O00487|PSDE_HUMAN	sp|O00487|PSDE_HUMAN	6	6	6	sp|O00487|PSDE_HUMAN 26S proteasome non-ATPase regulatory subunit 14 OS=Homo sapiens OX=9606 GN=PSMD14 PE=1 SV=1	1	6	6	6	3	3	3	3	3	3	4	3	4	2	4	4	5	4	5	6	5	5	3	3	3	3	3	3	4	3	4	2	4	4	5	4	5	6	5	5	3	3	3	3
sp|O00499|BIN1_HUMAN	sp|O00499|BIN1_HUMAN	3	3	3	sp|O00499|BIN1_HUMAN Myc box-dependent-interacting protein 1 OS=Homo sapiens OX=9606 GN=BIN1 PE=1 SV=1	1	3	3	3	0	0	0	0	0	0	2	2	1	1	1	3	0	0	0	0	0	0	0	0	0	0	0	0	2	2	1	1	1	3	0	0	0	0	0	0	0	0	0	0
sp|O00505|IMA4_HUMAN	sp|O00505|IMA4_HUMAN	11	7	7	sp|O00505|IMA4_HUMAN Importin subunit alpha-4 OS=Homo sapiens OX=9606 GN=KPNA3 PE=1 SV=2	1	11	7	7	4	5	5	6	4	6	2	3	2	1	2	1	9	9	7	5	7	7	3	4	4	5	3	5	1	2	1	0	1	0	6	6	4	4	5	5	3	4	4	5
sp|O00515|LAD1_HUMAN	sp|O00515|LAD1_HUMAN	7	7	7	sp|O00515|LAD1_HUMAN Ladinin-1 OS=Homo sapiens OX=9606 GN=LAD1 PE=1 SV=2	1	7	7	7	0	0	1	0	0	0	3	3	3	4	2	2	4	4	5	4	5	4	0	0	1	0	0	0	3	3	3	4	2	2	4	4	5	4	5	4	0	0	1	0
sp|O00519|FAAH1_HUMAN	sp|O00519|FAAH1_HUMAN	2	2	2	sp|O00519|FAAH1_HUMAN Fatty-acid amide hydrolase 1 OS=Homo sapiens OX=9606 GN=FAAH PE=1 SV=2	1	2	2	2	1	2	2	1	1	1	0	0	0	0	0	0	0	0	0	0	0	0	1	2	2	1	1	1	0	0	0	0	0	0	0	0	0	0	0	0	1	2	2	1
sp|O00534|VMA5A_HUMAN	sp|O00534|VMA5A_HUMAN	4	4	4	sp|O00534|VMA5A_HUMAN von Willebrand factor A domain-containing protein 5A OS=Homo sapiens OX=9606 GN=VWA5A PE=1 SV=2	1	4	4	4	2	2	2	3	2	2	1	1	1	2	2	2	0	0	0	0	1	0	2	2	2	3	2	2	1	1	1	2	2	2	0	0	0	0	1	0	2	2	2	3
sp|O00560|SDCB1_HUMAN	sp|O00560|SDCB1_HUMAN	7	7	7	sp|O00560|SDCB1_HUMAN Syntenin-1 OS=Homo sapiens OX=9606 GN=SDCBP PE=1 SV=1	1	7	7	7	6	3	5	4	6	5	0	0	0	1	1	0	1	2	4	3	3	3	6	3	5	4	6	5	0	0	0	1	1	0	1	2	4	3	3	3	6	3	5	4
sp|O00567|NOP56_HUMAN	sp|O00567|NOP56_HUMAN	7	7	7	sp|O00567|NOP56_HUMAN Nucleolar protein 56 OS=Homo sapiens OX=9606 GN=NOP56 PE=1 SV=4	1	7	7	7	2	4	4	6	4	6	1	1	2	1	1	1	0	1	2	0	1	0	2	4	4	6	4	6	1	1	2	1	1	1	0	1	2	0	1	0	2	4	4	6
sp|O00571|DDX3X_HUMAN;sp|O15523|DDX3Y_HUMAN	sp|O00571|DDX3X_HUMAN;sp|O15523|DDX3Y_HUMAN	12;9	11;8	11;8	sp|O00571|DDX3X_HUMAN ATP-dependent RNA helicase DDX3X OS=Homo sapiens OX=9606 GN=DDX3X PE=1 SV=3;sp|O15523|DDX3Y_HUMAN ATP-dependent RNA helicase DDX3Y OS=Homo sapiens OX=9606 GN=DDX3Y PE=1 SV=2	2	12	11	11	6	6	7	8	7	6	4	3	4	4	5	5	11	10	10	11	10	9	5	5	6	7	6	5	3	2	3	3	4	4	10	9	9	10	9	9	5	5	6	7
sp|O00584|RNT2_HUMAN	sp|O00584|RNT2_HUMAN	4	4	4	sp|O00584|RNT2_HUMAN Ribonuclease T2 OS=Homo sapiens OX=9606 GN=RNASET2 PE=1 SV=2	1	4	4	4	0	0	0	1	0	0	3	2	2	4	0	2	0	0	0	0	0	0	0	0	0	1	0	0	3	2	2	4	0	2	0	0	0	0	0	0	0	0	0	1
sp|O00625|PIR_HUMAN	sp|O00625|PIR_HUMAN	3	3	3	sp|O00625|PIR_HUMAN Pirin OS=Homo sapiens OX=9606 GN=PIR PE=1 SV=1	1	3	3	3	0	0	0	0	0	0	1	0	1	1	0	2	0	0	0	0	0	0	0	0	0	0	0	0	1	0	1	1	0	2	0	0	0	0	0	0	0	0	0	0
sp|O00629|IMA3_HUMAN	sp|O00629|IMA3_HUMAN	14	14	10	sp|O00629|IMA3_HUMAN Importin subunit alpha-3 OS=Homo sapiens OX=9606 GN=KPNA4 PE=1 SV=1	1	14	14	10	5	6	4	5	4	5	3	3	2	3	3	2	10	10	10	9	10	9	5	6	4	5	4	5	3	3	2	3	3	2	10	10	10	9	10	9	4	5	3	4
sp|O00743|PPP6_HUMAN	sp|O00743|PPP6_HUMAN	4	4	4	sp|O00743|PPP6_HUMAN Serine/threonine-protein phosphatase 6 catalytic subunit OS=Homo sapiens OX=9606 GN=PPP6C PE=1 SV=1	1	4	4	4	2	3	2	2	2	2	0	0	0	2	0	1	2	2	3	2	2	2	2	3	2	2	2	2	0	0	0	2	0	1	2	2	3	2	2	2	2	3	2	2
sp|O00748|EST2_HUMAN	sp|O00748|EST2_HUMAN	4	4	4	sp|O00748|EST2_HUMAN Cocaine esterase OS=Homo sapiens OX=9606 GN=CES2 PE=1 SV=1	1	4	4	4	0	0	0	0	0	0	0	1	0	0	0	0	1	0	1	1	2	3	0	0	0	0	0	0	0	1	0	0	0	0	1	0	1	1	2	3	0	0	0	0
sp|O00754|MA2B1_HUMAN	sp|O00754|MA2B1_HUMAN	5	5	5	sp|O00754|MA2B1_HUMAN Lysosomal alpha-mannosidase OS=Homo sapiens OX=9606 GN=MAN2B1 PE=1 SV=3	1	5	5	5	2	2	1	2	1	2	0	0	2	1	1	2	2	3	2	3	3	2	2	2	1	2	1	2	0	0	2	1	1	2	2	3	2	3	3	2	2	2	1	2
sp|O00764|PDXK_HUMAN	sp|O00764|PDXK_HUMAN	9	9	9	sp|O00764|PDXK_HUMAN Pyridoxal kinase OS=Homo sapiens OX=9606 GN=PDXK PE=1 SV=1	1	9	9	9	5	5	5	5	7	6	1	2	2	1	2	2	6	7	5	5	4	5	5	5	5	5	7	6	1	2	2	1	2	2	6	7	5	5	4	5	5	5	5	5
sp|O14494|PLPP1_HUMAN	sp|O14494|PLPP1_HUMAN	1	1	1	sp|O14494|PLPP1_HUMAN Phospholipid phosphatase 1 OS=Homo sapiens OX=9606 GN=PLPP1 PE=1 SV=1	1	1	1	1	0	0	0	0	1	0	0	0	0	0	0	0	1	1	1	1	0	1	0	0	0	0	1	0	0	0	0	0	0	0	1	1	1	1	0	1	0	0	0	0
sp|O14495|PLPP3_HUMAN	sp|O14495|PLPP3_HUMAN	2	2	2	sp|O14495|PLPP3_HUMAN Phospholipid phosphatase 3 OS=Homo sapiens OX=9606 GN=PLPP3 PE=1 SV=1	1	2	2	2	0	0	0	0	0	0	0	0	0	1	0	1	0	0	0	0	0	0	0	0	0	0	0	0	0	0	0	1	0	1	0	0	0	0	0	0	0	0	0	0
sp|O14497|ARI1A_HUMAN;sp|Q8NFD5|ARI1B_HUMAN	sp|O14497|ARI1A_HUMAN	3;1	3;1	3;1	sp|O14497|ARI1A_HUMAN AT-rich interactive domain-containing protein 1A OS=Homo sapiens OX=9606 GN=ARID1A PE=1 SV=3	2	3	3	3	0	0	0	0	0	0	0	0	0	0	0	0	2	1	1	1	1	2	0	0	0	0	0	0	0	0	0	0	0	0	2	1	1	1	1	2	0	0	0	0
sp|O14498|ISLR_HUMAN	sp|O14498|ISLR_HUMAN	4	4	4	sp|O14498|ISLR_HUMAN Immunoglobulin superfamily containing leucine-rich repeat protein OS=Homo sapiens OX=9606 GN=ISLR PE=2 SV=1	1	4	4	4	0	0	0	0	0	0	3	2	2	2	2	2	0	1	1	1	1	1	0	0	0	0	0	0	3	2	2	2	2	2	0	1	1	1	1	1	0	0	0	0
sp|O14548|COX7R_HUMAN	sp|O14548|COX7R_HUMAN	1	1	1	sp|O14548|COX7R_HUMAN Cytochrome c oxidase subunit 7A-related protein, mitochondrial OS=Homo sapiens OX=9606 GN=COX7A2L PE=1 SV=2	1	1	1	1	0	0	0	0	0	0	0	0	0	0	0	0	1	0	0	0	1	0	0	0	0	0	0	0	0	0	0	0	0	0	1	0	0	0	1	0	0	0	0	0
sp|O14558|HSPB6_HUMAN	sp|O14558|HSPB6_HUMAN	8	8	8	sp|O14558|HSPB6_HUMAN Heat shock protein beta-6 OS=Homo sapiens OX=9606 GN=HSPB6 PE=1 SV=2	1	8	8	8	3	3	3	3	2	3	7	8	8	7	8	8	2	1	4	2	3	2	3	3	3	3	2	3	7	8	8	7	8	8	2	1	4	2	3	2	3	3	3	3
sp|O14561|ACPM_HUMAN	sp|O14561|ACPM_HUMAN	3	3	3	sp|O14561|ACPM_HUMAN Acyl carrier protein, mitochondrial OS=Homo sapiens OX=9606 GN=NDUFAB1 PE=1 SV=3	1	3	3	3	2	2	2	2	2	2	2	2	3	2	3	3	2	2	2	2	2	2	2	2	2	2	2	2	2	2	3	2	3	3	2	2	2	2	2	2	2	2	2	2
sp|O14562|UBFD1_HUMAN	sp|O14562|UBFD1_HUMAN	2	2	2	sp|O14562|UBFD1_HUMAN Ubiquitin domain-containing protein UBFD1 OS=Homo sapiens OX=9606 GN=UBFD1 PE=1 SV=2	1	2	2	2	0	0	1	0	1	1	0	0	0	0	0	0	0	0	0	0	0	1	0	0	1	0	1	1	0	0	0	0	0	0	0	0	0	0	0	1	0	0	1	0
sp|O14569|C56D2_HUMAN	sp|O14569|C56D2_HUMAN	1	1	1	sp|O14569|C56D2_HUMAN Transmembrane reductase CYB561D2 OS=Homo sapiens OX=9606 GN=CYB561D2 PE=1 SV=1	1	1	1	1	0	1	0	0	1	0	0	0	0	0	0	0	0	0	0	0	0	0	0	1	0	0	1	0	0	0	0	0	0	0	0	0	0	0	0	0	0	1	0	0
sp|O14576|DC1I1_HUMAN	sp|O14576|DC1I1_HUMAN	1	1	1	sp|O14576|DC1I1_HUMAN Cytoplasmic dynein 1 intermediate chain 1 OS=Homo sapiens OX=9606 GN=DYNC1I1 PE=1 SV=2	1	1	1	1	0	0	0	0	1	0	0	0	0	0	0	0	0	0	0	0	0	0	0	0	0	0	1	0	0	0	0	0	0	0	0	0	0	0	0	0	0	0	0	0
sp|O14579|COPE_HUMAN	sp|O14579|COPE_HUMAN	6	6	6	sp|O14579|COPE_HUMAN Coatomer subunit epsilon OS=Homo sapiens OX=9606 GN=COPE PE=1 SV=3	1	6	6	6	5	5	5	5	5	5	4	4	4	4	4	3	5	5	5	5	5	5	5	5	5	5	5	5	4	4	4	4	4	3	5	5	5	5	5	5	5	5	5	5
sp|O14617|AP3D1_HUMAN	sp|O14617|AP3D1_HUMAN	17	17	17	sp|O14617|AP3D1_HUMAN AP-3 complex subunit delta-1 OS=Homo sapiens OX=9606 GN=AP3D1 PE=1 SV=1	1	17	17	17	10	8	5	9	7	7	1	0	0	1	1	0	4	4	2	3	3	4	10	8	5	9	7	7	1	0	0	1	1	0	4	4	2	3	3	4	10	8	5	9
sp|O14618|CCS_HUMAN	sp|O14618|CCS_HUMAN	3	3	3	sp|O14618|CCS_HUMAN Copper chaperone for superoxide dismutase OS=Homo sapiens OX=9606 GN=CCS PE=1 SV=1	1	3	3	3	0	0	0	0	0	0	2	1	0	1	0	0	0	1	0	0	0	1	0	0	0	0	0	0	2	1	0	1	0	0	0	1	0	0	0	1	0	0	0	0
sp|O14639|ABLM1_HUMAN	sp|O14639|ABLM1_HUMAN	1	1	1	sp|O14639|ABLM1_HUMAN Actin-binding LIM protein 1 OS=Homo sapiens OX=9606 GN=ABLIM1 PE=1 SV=3	1	1	1	1	0	0	0	1	0	0	0	0	0	0	0	0	0	0	0	0	0	0	0	0	0	1	0	0	0	0	0	0	0	0	0	0	0	0	0	0	0	0	0	1
sp|O14653|GOSR2_HUMAN	sp|O14653|GOSR2_HUMAN	1	1	1	sp|O14653|GOSR2_HUMAN Golgi SNAP receptor complex member 2 OS=Homo sapiens OX=9606 GN=GOSR2 PE=1 SV=2	1	1	1	1	0	0	0	0	0	0	0	0	0	1	1	0	1	1	0	1	1	1	0	0	0	0	0	0	0	0	0	1	1	0	1	1	0	1	1	1	0	0	0	0
sp|O14657|TOR1B_HUMAN	sp|O14657|TOR1B_HUMAN	2	2	2	sp|O14657|TOR1B_HUMAN Torsin-1B OS=Homo sapiens OX=9606 GN=TOR1B PE=1 SV=2	1	2	2	2	0	1	0	1	0	1	0	0	0	0	0	0	1	1	1	1	0	1	0	1	0	1	0	1	0	0	0	0	0	0	1	1	1	1	0	1	0	1	0	1
sp|O14672|ADA10_HUMAN	sp|O14672|ADA10_HUMAN	10	10	10	sp|O14672|ADA10_HUMAN Disintegrin and metalloproteinase domain-containing protein 10 OS=Homo sapiens OX=9606 GN=ADAM10 PE=1 SV=1	1	10	10	10	7	5	5	6	7	8	0	0	0	0	0	0	1	1	1	1	2	1	7	5	5	6	7	8	0	0	0	0	0	0	1	1	1	1	2	1	7	5	5	6
sp|O14681|EI24_HUMAN	sp|O14681|EI24_HUMAN	1	1	1	sp|O14681|EI24_HUMAN Etoposide-induced protein 2.4 homolog OS=Homo sapiens OX=9606 GN=EI24 PE=1 SV=4	1	1	1	1	0	1	0	0	1	0	0	0	0	0	0	0	0	0	0	0	0	0	0	1	0	0	1	0	0	0	0	0	0	0	0	0	0	0	0	0	0	1	0	0
sp|O14732|IMPA2_HUMAN	sp|O14732|IMPA2_HUMAN	2	2	2	sp|O14732|IMPA2_HUMAN Inositol monophosphatase 2 OS=Homo sapiens OX=9606 GN=IMPA2 PE=1 SV=1	1	2	2	2	0	0	0	0	0	0	0	0	0	0	0	0	2	2	1	1	2	1	0	0	0	0	0	0	0	0	0	0	0	0	2	2	1	1	2	1	0	0	0	0
sp|O14734|ACOT8_HUMAN	sp|O14734|ACOT8_HUMAN	2	2	2	sp|O14734|ACOT8_HUMAN Acyl-coenzyme A thioesterase 8 OS=Homo sapiens OX=9606 GN=ACOT8 PE=1 SV=1	1	2	2	2	0	0	0	1	0	0	0	0	0	0	0	0	0	0	0	0	0	1	0	0	0	1	0	0	0	0	0	0	0	0	0	0	0	0	0	1	0	0	0	1
sp|O14735|CDIPT_HUMAN	sp|O14735|CDIPT_HUMAN	3	3	3	sp|O14735|CDIPT_HUMAN CDP-diacylglycerol--inositol 3-phosphatidyltransferase OS=Homo sapiens OX=9606 GN=CDIPT PE=1 SV=1	1	3	3	3	0	0	0	0	1	0	1	0	0	0	1	0	1	1	0	0	1	2	0	0	0	0	1	0	1	0	0	0	1	0	1	1	0	0	1	2	0	0	0	0
sp|O14737|PDCD5_HUMAN	sp|O14737|PDCD5_HUMAN	4	4	4	sp|O14737|PDCD5_HUMAN Programmed cell death protein 5 OS=Homo sapiens OX=9606 GN=PDCD5 PE=1 SV=3	1	4	4	4	3	2	2	1	2	1	1	1	2	1	1	1	2	2	2	2	1	2	3	2	2	1	2	1	1	1	2	1	1	1	2	2	2	2	1	2	3	2	2	1
sp|O14744|ANM5_HUMAN	sp|O14744|ANM5_HUMAN	6	6	6	sp|O14744|ANM5_HUMAN Protein arginine N-methyltransferase 5 OS=Homo sapiens OX=9606 GN=PRMT5 PE=1 SV=4	1	6	6	6	2	2	1	3	2	3	2	2	2	2	0	2	3	3	2	1	1	2	2	2	1	3	2	3	2	2	2	2	0	2	3	3	2	1	1	2	2	2	1	3
sp|O14745|NHRF1_HUMAN	sp|O14745|NHRF1_HUMAN	12	12	12	sp|O14745|NHRF1_HUMAN Na(+)/H(+) exchange regulatory cofactor NHE-RF1 OS=Homo sapiens OX=9606 GN=SLC9A3R1 PE=1 SV=4	1	12	12	12	1	2	1	0	1	2	2	2	3	1	4	2	8	10	7	9	8	9	1	2	1	0	1	2	2	2	3	1	4	2	8	10	7	9	8	9	1	2	1	0
sp|O14773|TPP1_HUMAN	sp|O14773|TPP1_HUMAN	7	7	7	sp|O14773|TPP1_HUMAN Tripeptidyl-peptidase 1 OS=Homo sapiens OX=9606 GN=TPP1 PE=1 SV=2	1	7	7	7	5	5	4	6	5	6	4	4	4	4	5	4	4	4	3	4	4	4	5	5	4	6	5	6	4	4	4	4	5	4	4	4	3	4	4	4	5	5	4	6
sp|O14776|TCRG1_HUMAN	sp|O14776|TCRG1_HUMAN	5	5	5	sp|O14776|TCRG1_HUMAN Transcription elongation regulator 1 OS=Homo sapiens OX=9606 GN=TCERG1 PE=1 SV=2	1	5	5	5	1	0	1	2	1	1	0	0	0	0	0	0	2	2	3	2	2	2	1	0	1	2	1	1	0	0	0	0	0	0	2	2	3	2	2	2	1	0	1	2
sp|O14786|NRP1_HUMAN	sp|O14786|NRP1_HUMAN	4	4	4	sp|O14786|NRP1_HUMAN Neuropilin-1 OS=Homo sapiens OX=9606 GN=NRP1 PE=1 SV=3	1	4	4	4	0	0	1	1	1	0	0	1	0	1	0	1	1	1	0	2	0	0	0	0	1	1	1	0	0	1	0	1	0	1	1	1	0	2	0	0	0	0	1	1
sp|O14787|TNPO2_HUMAN	sp|O14787|TNPO2_HUMAN	7	5	5	sp|O14787|TNPO2_HUMAN Transportin-2 OS=Homo sapiens OX=9606 GN=TNPO2 PE=1 SV=3	1	7	5	5	2	1	2	1	0	1	1	1	1	0	0	0	4	3	2	2	4	4	2	1	2	1	0	1	1	1	0	0	0	0	2	1	1	1	3	3	2	1	2	1
sp|O14791|APOL1_HUMAN	sp|O14791|APOL1_HUMAN	2	2	2	sp|O14791|APOL1_HUMAN Apolipoprotein L1 OS=Homo sapiens OX=9606 GN=APOL1 PE=1 SV=5	1	2	2	2	1	1	1	1	0	0	0	0	0	0	0	0	2	1	2	2	2	2	1	1	1	1	0	0	0	0	0	0	0	0	2	1	2	2	2	2	1	1	1	1
sp|O14818|PSA7_HUMAN;sp|Q8TAA3|PSMA8_HUMAN	sp|O14818|PSA7_HUMAN	14;5	14;5	14;5	sp|O14818|PSA7_HUMAN Proteasome subunit alpha type-7 OS=Homo sapiens OX=9606 GN=PSMA7 PE=1 SV=1	2	14	14	14	8	10	10	10	10	10	8	10	10	9	9	7	11	12	10	10	9	13	8	10	10	10	10	10	8	10	10	9	9	7	11	12	10	10	9	13	8	10	10	10
sp|O14828|SCAM3_HUMAN	sp|O14828|SCAM3_HUMAN	2	2	2	sp|O14828|SCAM3_HUMAN Secretory carrier-associated membrane protein 3 OS=Homo sapiens OX=9606 GN=SCAMP3 PE=1 SV=3	1	2	2	2	1	1	1	1	1	1	0	0	0	0	0	0	1	1	1	1	2	2	1	1	1	1	1	1	0	0	0	0	0	0	1	1	1	1	2	2	1	1	1	1
sp|O14841|OPLA_HUMAN	sp|O14841|OPLA_HUMAN	2	2	2	sp|O14841|OPLA_HUMAN 5-oxoprolinase OS=Homo sapiens OX=9606 GN=OPLAH PE=1 SV=3	1	2	2	2	0	0	0	0	0	0	0	0	0	0	0	0	0	1	0	1	1	0	0	0	0	0	0	0	0	0	0	0	0	0	0	1	0	1	1	0	0	0	0	0
sp|O14879|IFIT3_HUMAN	sp|O14879|IFIT3_HUMAN	7	7	7	sp|O14879|IFIT3_HUMAN Interferon-induced protein with tetratricopeptide repeats 3 OS=Homo sapiens OX=9606 GN=IFIT3 PE=1 SV=1	1	7	7	7	0	0	0	0	0	0	0	0	0	0	0	0	4	5	4	5	4	4	0	0	0	0	0	0	0	0	0	0	0	0	4	5	4	5	4	4	0	0	0	0
sp|O14880|MGST3_HUMAN	sp|O14880|MGST3_HUMAN	5	5	5	sp|O14880|MGST3_HUMAN Microsomal glutathione S-transferase 3 OS=Homo sapiens OX=9606 GN=MGST3 PE=1 SV=1	1	5	5	5	4	2	3	4	3	3	2	1	1	3	2	3	2	2	2	2	2	2	4	2	3	4	3	3	2	1	1	3	2	3	2	2	2	2	2	2	4	2	3	4
sp|O14896|IRF6_HUMAN	sp|O14896|IRF6_HUMAN	8	8	8	sp|O14896|IRF6_HUMAN Interferon regulatory factor 6 OS=Homo sapiens OX=9606 GN=IRF6 PE=1 SV=1	1	8	8	8	0	0	0	0	0	0	0	0	0	0	0	0	5	3	6	4	4	4	0	0	0	0	0	0	0	0	0	0	0	0	5	3	6	4	4	4	0	0	0	0
sp|O14907|TX1B3_HUMAN	sp|O14907|TX1B3_HUMAN	2	2	2	sp|O14907|TX1B3_HUMAN Tax1-binding protein 3 OS=Homo sapiens OX=9606 GN=TAX1BP3 PE=1 SV=2	1	2	2	2	1	1	1	1	1	1	2	2	2	2	2	2	1	1	1	1	1	1	1	1	1	1	1	1	2	2	2	2	2	2	1	1	1	1	1	1	1	1	1	1
sp|O14908|GIPC1_HUMAN;sp|Q8TF64|GIPC3_HUMAN	sp|O14908|GIPC1_HUMAN	4;1	4;1	4;1	sp|O14908|GIPC1_HUMAN PDZ domain-containing protein GIPC1 OS=Homo sapiens OX=9606 GN=GIPC1 PE=1 SV=2	2	4	4	4	1	2	1	1	1	1	1	1	1	1	0	2	1	1	1	2	1	1	1	2	1	1	1	1	1	1	1	1	0	2	1	1	1	2	1	1	1	2	1	1
sp|O14929|HAT1_HUMAN	sp|O14929|HAT1_HUMAN	7	7	7	sp|O14929|HAT1_HUMAN Histone acetyltransferase type B catalytic subunit OS=Homo sapiens OX=9606 GN=HAT1 PE=1 SV=1	1	7	7	7	1	1	0	0	0	1	0	0	0	0	0	0	5	6	6	3	5	5	1	1	0	0	0	1	0	0	0	0	0	0	5	6	6	3	5	5	1	1	0	0
sp|O14933|UB2L6_HUMAN	sp|O14933|UB2L6_HUMAN	3	3	3	sp|O14933|UB2L6_HUMAN Ubiquitin/ISG15-conjugating enzyme E2 L6 OS=Homo sapiens OX=9606 GN=UBE2L6 PE=1 SV=4	1	3	3	3	1	1	1	1	1	1	1	1	1	1	1	1	2	3	3	2	3	1	1	1	1	1	1	1	1	1	1	1	1	1	2	3	3	2	3	1	1	1	1	1
sp|O14936|CSKP_HUMAN	sp|O14936|CSKP_HUMAN	5	5	5	sp|O14936|CSKP_HUMAN Peripheral plasma membrane protein CASK OS=Homo sapiens OX=9606 GN=CASK PE=1 SV=3	1	5	5	5	1	1	1	2	1	1	0	0	0	0	0	0	0	1	1	1	1	2	1	1	1	2	1	1	0	0	0	0	0	0	0	1	1	1	1	2	1	1	1	2
sp|O14964|HGS_HUMAN	sp|O14964|HGS_HUMAN	5	5	5	sp|O14964|HGS_HUMAN Hepatocyte growth factor-regulated tyrosine kinase substrate OS=Homo sapiens OX=9606 GN=HGS PE=1 SV=1	1	5	5	5	1	2	1	1	1	2	1	2	2	1	1	2	1	1	1	1	2	1	1	2	1	1	1	2	1	2	2	1	1	2	1	1	1	1	2	1	1	2	1	1
sp|O14972|VP26C_HUMAN	sp|O14972|VP26C_HUMAN	4	4	4	sp|O14972|VP26C_HUMAN Vacuolar protein sorting-associated protein 26C OS=Homo sapiens OX=9606 GN=VPS26C PE=1 SV=1	1	4	4	4	1	2	2	1	1	1	0	0	1	0	0	1	1	2	0	0	2	1	1	2	2	1	1	1	0	0	1	0	0	1	1	2	0	0	2	1	1	2	2	1
sp|O14974|MYPT1_HUMAN	sp|O14974|MYPT1_HUMAN	4	4	4	sp|O14974|MYPT1_HUMAN Protein phosphatase 1 regulatory subunit 12A OS=Homo sapiens OX=9606 GN=PPP1R12A PE=1 SV=1	1	4	4	4	0	0	0	0	0	0	0	0	1	0	0	2	1	1	1	2	2	2	0	0	0	0	0	0	0	0	1	0	0	2	1	1	1	2	2	2	0	0	0	0
sp|O14976|GAK_HUMAN	sp|O14976|GAK_HUMAN	4	4	4	sp|O14976|GAK_HUMAN Cyclin-G-associated kinase OS=Homo sapiens OX=9606 GN=GAK PE=1 SV=2	1	4	4	4	0	1	1	0	0	0	0	0	0	0	0	0	0	0	2	1	0	0	0	1	1	0	0	0	0	0	0	0	0	0	0	0	2	1	0	0	0	1	1	0
sp|O14979|HNRDL_HUMAN	sp|O14979|HNRDL_HUMAN	5	4	4	sp|O14979|HNRDL_HUMAN Heterogeneous nuclear ribonucleoprotein D-like OS=Homo sapiens OX=9606 GN=HNRNPDL PE=1 SV=3	1	5	4	4	5	5	4	4	5	5	3	3	3	3	3	2	4	5	4	4	4	5	4	4	3	3	4	4	2	2	2	2	2	1	3	4	3	3	3	4	4	4	3	3
sp|O14980|XPO1_HUMAN	sp|O14980|XPO1_HUMAN	27	27	27	sp|O14980|XPO1_HUMAN Exportin-1 OS=Homo sapiens OX=9606 GN=XPO1 PE=1 SV=1	1	27	27	27	13	15	13	15	13	14	5	7	6	6	8	7	19	19	17	17	18	20	13	15	13	15	13	14	5	7	6	6	8	7	19	19	17	17	18	20	13	15	13	15
sp|O14981|BTAF1_HUMAN	sp|O14981|BTAF1_HUMAN	1	1	1	sp|O14981|BTAF1_HUMAN TATA-binding protein-associated factor 172 OS=Homo sapiens OX=9606 GN=BTAF1 PE=1 SV=2	1	1	1	1	0	0	0	0	1	0	0	0	0	0	0	0	0	0	0	0	0	0	0	0	0	0	1	0	0	0	0	0	0	0	0	0	0	0	0	0	0	0	0	0
sp|O15020|SPTN2_HUMAN	sp|O15020|SPTN2_HUMAN	34	27	27	sp|O15020|SPTN2_HUMAN Spectrin beta chain, non-erythrocytic 2 OS=Homo sapiens OX=9606 GN=SPTBN2 PE=1 SV=3	1	34	27	27	14	14	12	11	16	14	4	4	5	2	2	3	14	18	12	17	15	17	8	10	7	7	11	9	1	1	2	0	1	1	9	13	8	12	11	12	8	10	7	7
sp|O15027|SC16A_HUMAN	sp|O15027|SC16A_HUMAN	3	3	3	sp|O15027|SC16A_HUMAN Protein transport protein Sec16A OS=Homo sapiens OX=9606 GN=SEC16A PE=1 SV=4	1	3	3	3	1	0	1	0	0	2	0	0	0	0	0	0	0	0	0	0	1	0	1	0	1	0	0	2	0	0	0	0	0	0	0	0	0	0	1	0	1	0	1	0
sp|O15031|PLXB2_HUMAN	sp|O15031|PLXB2_HUMAN	22	22	22	sp|O15031|PLXB2_HUMAN Plexin-B2 OS=Homo sapiens OX=9606 GN=PLXNB2 PE=1 SV=3	1	22	22	22	8	8	6	7	7	9	2	3	3	1	3	3	10	9	7	11	8	8	8	8	6	7	7	9	2	3	3	1	3	3	10	9	7	11	8	8	8	8	6	7
sp|O15042|SR140_HUMAN	sp|O15042|SR140_HUMAN	4	4	4	sp|O15042|SR140_HUMAN U2 snRNP-associated SURP motif-containing protein OS=Homo sapiens OX=9606 GN=U2SURP PE=1 SV=2	1	4	4	4	0	0	0	0	0	0	0	0	0	0	0	0	1	1	1	0	3	2	0	0	0	0	0	0	0	0	0	0	0	0	1	1	1	0	3	2	0	0	0	0
sp|O15061|SYNEM_HUMAN	sp|O15061|SYNEM_HUMAN	18	18	18	sp|O15061|SYNEM_HUMAN Synemin OS=Homo sapiens OX=9606 GN=SYNM PE=1 SV=2	1	18	18	18	5	8	9	12	8	6	0	0	0	0	0	0	1	1	0	1	0	1	5	8	9	12	8	6	0	0	0	0	0	0	1	1	0	1	0	1	5	8	9	12
sp|O15067|PUR4_HUMAN	sp|O15067|PUR4_HUMAN	6	6	6	sp|O15067|PUR4_HUMAN Phosphoribosylformylglycinamidine synthase OS=Homo sapiens OX=9606 GN=PFAS PE=1 SV=4	1	6	6	6	2	3	3	3	4	2	1	1	1	1	1	0	1	3	2	1	4	5	2	3	3	3	4	2	1	1	1	1	1	0	1	3	2	1	4	5	2	3	3	3
sp|O15116|LSM1_HUMAN	sp|O15116|LSM1_HUMAN	2	2	2	sp|O15116|LSM1_HUMAN U6 snRNA-associated Sm-like protein LSm1 OS=Homo sapiens OX=9606 GN=LSM1 PE=1 SV=1	1	2	2	2	1	0	1	0	0	1	0	1	0	0	0	1	0	0	1	0	0	0	1	0	1	0	0	1	0	1	0	0	0	1	0	0	1	0	0	0	1	0	1	0
sp|O15118|NPC1_HUMAN	sp|O15118|NPC1_HUMAN	1	1	1	sp|O15118|NPC1_HUMAN NPC intracellular cholesterol transporter 1 OS=Homo sapiens OX=9606 GN=NPC1 PE=1 SV=2	1	1	1	1	1	1	1	1	0	0	0	0	0	0	0	0	0	0	0	0	0	0	1	1	1	1	0	0	0	0	0	0	0	0	0	0	0	0	0	0	1	1	1	1
sp|O15126|SCAM1_HUMAN	sp|O15126|SCAM1_HUMAN	5	5	5	sp|O15126|SCAM1_HUMAN Secretory carrier-associated membrane protein 1 OS=Homo sapiens OX=9606 GN=SCAMP1 PE=1 SV=2	1	5	5	5	4	3	2	1	3	4	1	2	2	1	1	1	2	2	3	2	2	1	4	3	2	1	3	4	1	2	2	1	1	1	2	2	3	2	2	1	4	3	2	1
sp|O15127|SCAM2_HUMAN	sp|O15127|SCAM2_HUMAN	2	2	2	sp|O15127|SCAM2_HUMAN Secretory carrier-associated membrane protein 2 OS=Homo sapiens OX=9606 GN=SCAMP2 PE=1 SV=2	1	2	2	2	2	2	2	2	2	2	0	0	0	0	0	0	2	1	2	2	1	2	2	2	2	2	2	2	0	0	0	0	0	0	2	1	2	2	1	2	2	2	2	2
sp|O15143|ARC1B_HUMAN	sp|O15143|ARC1B_HUMAN	10	10	9	sp|O15143|ARC1B_HUMAN Actin-related protein 2/3 complex subunit 1B OS=Homo sapiens OX=9606 GN=ARPC1B PE=1 SV=3	1	10	10	9	8	9	9	9	9	9	6	4	5	4	4	5	8	9	9	8	10	10	8	9	9	9	9	9	6	4	5	4	4	5	8	9	9	8	10	10	7	8	8	8
sp|O15144|ARPC2_HUMAN	sp|O15144|ARPC2_HUMAN	14	14	14	sp|O15144|ARPC2_HUMAN Actin-related protein 2/3 complex subunit 2 OS=Homo sapiens OX=9606 GN=ARPC2 PE=1 SV=1	1	14	14	14	9	13	11	10	12	12	7	6	7	6	5	5	9	9	9	9	10	9	9	13	11	10	12	12	7	6	7	6	5	5	9	9	9	9	10	9	9	13	11	10
sp|O15145|ARPC3_HUMAN	sp|O15145|ARPC3_HUMAN	7	7	7	sp|O15145|ARPC3_HUMAN Actin-related protein 2/3 complex subunit 3 OS=Homo sapiens OX=9606 GN=ARPC3 PE=1 SV=3	1	7	7	7	5	4	4	5	4	5	4	4	4	4	5	4	4	5	4	4	5	4	5	4	4	5	4	5	4	4	4	4	5	4	4	5	4	4	5	4	5	4	4	5
sp|O15156|ZBT7B_HUMAN	sp|O15156|ZBT7B_HUMAN	1	1	1	sp|O15156|ZBT7B_HUMAN Zinc finger and BTB domain-containing protein 7B OS=Homo sapiens OX=9606 GN=ZBTB7B PE=1 SV=2	1	1	1	1	0	0	0	1	0	0	0	0	0	0	0	0	0	0	0	0	0	0	0	0	0	1	0	0	0	0	0	0	0	0	0	0	0	0	0	0	0	0	0	1
sp|O15160|RPAC1_HUMAN	sp|O15160|RPAC1_HUMAN	3	3	3	sp|O15160|RPAC1_HUMAN DNA-directed RNA polymerases I and III subunit RPAC1 OS=Homo sapiens OX=9606 GN=POLR1C PE=1 SV=1	1	3	3	3	0	0	0	0	0	0	0	0	0	0	0	0	1	2	2	2	0	2	0	0	0	0	0	0	0	0	0	0	0	0	1	2	2	2	0	2	0	0	0	0
sp|O15173|PGRC2_HUMAN	sp|O15173|PGRC2_HUMAN	4	4	4	sp|O15173|PGRC2_HUMAN Membrane-associated progesterone receptor component 2 OS=Homo sapiens OX=9606 GN=PGRMC2 PE=1 SV=1	1	4	4	4	3	4	4	3	3	3	2	2	1	1	2	2	2	3	2	2	2	2	3	4	4	3	3	3	2	2	1	1	2	2	2	3	2	2	2	2	3	4	4	3
sp|O15212|PFD6_HUMAN	sp|O15212|PFD6_HUMAN	3	3	3	sp|O15212|PFD6_HUMAN Prefoldin subunit 6 OS=Homo sapiens OX=9606 GN=PFDN6 PE=1 SV=1	1	3	3	3	1	1	0	1	0	1	1	1	1	1	1	1	2	2	3	2	1	3	1	1	0	1	0	1	1	1	1	1	1	1	2	2	3	2	1	3	1	1	0	1
sp|O15230|LAMA5_HUMAN	sp|O15230|LAMA5_HUMAN	30	30	29	sp|O15230|LAMA5_HUMAN Laminin subunit alpha-5 OS=Homo sapiens OX=9606 GN=LAMA5 PE=1 SV=8	1	30	30	29	14	15	11	12	13	11	13	11	13	13	12	10	2	1	0	1	0	0	14	15	11	12	13	11	13	11	13	13	12	10	2	1	0	1	0	0	14	15	11	12
sp|O15231|ZN185_HUMAN	sp|O15231|ZN185_HUMAN	21	21	21	sp|O15231|ZN185_HUMAN Zinc finger protein 185 OS=Homo sapiens OX=9606 GN=ZNF185 PE=1 SV=3	1	21	21	21	5	4	5	5	5	4	8	9	10	10	10	11	15	15	14	15	13	15	5	4	5	5	5	4	8	9	10	10	10	11	15	15	14	15	13	15	5	4	5	5
sp|O15247|CLIC2_HUMAN	sp|O15247|CLIC2_HUMAN	8	8	8	sp|O15247|CLIC2_HUMAN Chloride intracellular channel protein 2 OS=Homo sapiens OX=9606 GN=CLIC2 PE=1 SV=3	1	8	8	8	1	0	0	0	0	0	4	4	3	4	3	4	3	5	4	3	4	3	1	0	0	0	0	0	4	4	3	4	3	4	3	5	4	3	4	3	1	0	0	0
sp|O15254|ACOX3_HUMAN	sp|O15254|ACOX3_HUMAN	6	6	6	sp|O15254|ACOX3_HUMAN Peroxisomal acyl-coenzyme A oxidase 3 OS=Homo sapiens OX=9606 GN=ACOX3 PE=1 SV=2	1	6	6	6	3	4	1	3	3	3	0	0	0	1	0	1	1	2	1	0	1	1	3	4	1	3	3	3	0	0	0	1	0	1	1	2	1	0	1	1	3	4	1	3
sp|O15258|RER1_HUMAN	sp|O15258|RER1_HUMAN	2	2	2	sp|O15258|RER1_HUMAN Protein RER1 OS=Homo sapiens OX=9606 GN=RER1 PE=1 SV=1	1	2	2	2	1	1	1	2	1	1	0	0	0	0	0	0	1	1	1	1	0	1	1	1	1	2	1	1	0	0	0	0	0	0	1	1	1	1	0	1	1	1	1	2
sp|O15260|SURF4_HUMAN	sp|O15260|SURF4_HUMAN	4	4	4	sp|O15260|SURF4_HUMAN Surfeit locus protein 4 OS=Homo sapiens OX=9606 GN=SURF4 PE=1 SV=3	1	4	4	4	3	2	3	3	3	3	3	2	0	0	1	2	3	4	4	4	3	4	3	2	3	3	3	3	3	2	0	0	1	2	3	4	4	4	3	4	3	2	3	3
sp|O15264|MK13_HUMAN;sp|P53778|MK12_HUMAN	sp|O15264|MK13_HUMAN	3;1	3;1	3;1	sp|O15264|MK13_HUMAN Mitogen-activated protein kinase 13 OS=Homo sapiens OX=9606 GN=MAPK13 PE=1 SV=1	2	3	3	3	0	1	1	2	1	2	0	0	0	0	0	0	1	1	1	1	1	3	0	1	1	2	1	2	0	0	0	0	0	0	1	1	1	1	1	3	0	1	1	2
sp|O15269|SPTC1_HUMAN	sp|O15269|SPTC1_HUMAN	2	2	2	sp|O15269|SPTC1_HUMAN Serine palmitoyltransferase 1 OS=Homo sapiens OX=9606 GN=SPTLC1 PE=1 SV=1	1	2	2	2	1	2	0	1	0	0	0	0	0	0	0	0	0	0	2	1	1	1	1	2	0	1	0	0	0	0	0	0	0	0	0	0	2	1	1	1	1	2	0	1
sp|O15270|SPTC2_HUMAN	sp|O15270|SPTC2_HUMAN	4	4	4	sp|O15270|SPTC2_HUMAN Serine palmitoyltransferase 2 OS=Homo sapiens OX=9606 GN=SPTLC2 PE=1 SV=1	1	4	4	4	2	2	2	3	1	1	0	0	0	0	0	0	2	2	1	1	2	1	2	2	2	3	1	1	0	0	0	0	0	0	2	2	1	1	2	1	2	2	2	3
sp|O15294|OGT1_HUMAN	sp|O15294|OGT1_HUMAN	3	3	3	sp|O15294|OGT1_HUMAN UDP-N-acetylglucosamine--peptide N-acetylglucosaminyltransferase 110 kDa subunit OS=Homo sapiens OX=9606 GN=OGT PE=1 SV=3	1	3	3	3	2	3	3	1	1	2	0	0	0	0	0	0	0	0	0	0	0	0	2	3	3	1	1	2	0	0	0	0	0	0	0	0	0	0	0	0	2	3	3	1
sp|O15296|LX15B_HUMAN	sp|O15296|LX15B_HUMAN	2	2	2	sp|O15296|LX15B_HUMAN Polyunsaturated fatty acid lipoxygenase ALOX15B OS=Homo sapiens OX=9606 GN=ALOX15B PE=1 SV=3	1	2	2	2	0	0	0	0	0	0	1	2	1	2	2	2	1	2	2	1	2	2	0	0	0	0	0	0	1	2	1	2	2	2	1	2	2	1	2	2	0	0	0	0
sp|O15305|PMM2_HUMAN	sp|O15305|PMM2_HUMAN	1	1	1	sp|O15305|PMM2_HUMAN Phosphomannomutase 2 OS=Homo sapiens OX=9606 GN=PMM2 PE=1 SV=1	1	1	1	1	1	1	0	0	1	1	0	0	0	0	0	0	1	1	0	1	1	1	1	1	0	0	1	1	0	0	0	0	0	0	1	1	0	1	1	1	1	1	0	0
sp|O15321|TM9S1_HUMAN	sp|O15321|TM9S1_HUMAN	2	2	2	sp|O15321|TM9S1_HUMAN Transmembrane 9 superfamily member 1 OS=Homo sapiens OX=9606 GN=TM9SF1 PE=2 SV=2	1	2	2	2	2	0	0	1	0	1	0	0	0	0	0	0	0	0	0	1	1	0	2	0	0	1	0	1	0	0	0	0	0	0	0	0	0	1	1	0	2	0	0	1
sp|O15347|HMGB3_HUMAN	sp|O15347|HMGB3_HUMAN	1	1	1	sp|O15347|HMGB3_HUMAN High mobility group protein B3 OS=Homo sapiens OX=9606 GN=HMGB3 PE=1 SV=4	1	1	1	1	1	1	1	1	1	1	0	0	0	0	0	0	1	1	1	1	1	1	1	1	1	1	1	1	0	0	0	0	0	0	1	1	1	1	1	1	1	1	1	1
sp|O15355|PPM1G_HUMAN	sp|O15355|PPM1G_HUMAN	5	5	5	sp|O15355|PPM1G_HUMAN Protein phosphatase 1G OS=Homo sapiens OX=9606 GN=PPM1G PE=1 SV=1	1	5	5	5	1	3	1	1	2	2	0	0	0	0	0	0	2	1	2	4	1	1	1	3	1	1	2	2	0	0	0	0	0	0	2	1	2	4	1	1	1	3	1	1
sp|O15371|EIF3D_HUMAN	sp|O15371|EIF3D_HUMAN	6	6	6	sp|O15371|EIF3D_HUMAN Eukaryotic translation initiation factor 3 subunit D OS=Homo sapiens OX=9606 GN=EIF3D PE=1 SV=1	1	6	6	6	4	5	5	4	4	4	1	1	1	1	1	1	5	5	5	5	4	4	4	5	5	4	4	4	1	1	1	1	1	1	5	5	5	5	4	4	4	5	5	4
sp|O15372|EIF3H_HUMAN	sp|O15372|EIF3H_HUMAN	10	10	10	sp|O15372|EIF3H_HUMAN Eukaryotic translation initiation factor 3 subunit H OS=Homo sapiens OX=9606 GN=EIF3H PE=1 SV=1	1	10	10	10	2	3	0	2	3	3	3	3	2	4	3	3	4	6	5	4	4	5	2	3	0	2	3	3	3	3	2	4	3	3	4	6	5	4	4	5	2	3	0	2
sp|O15382|BCAT2_HUMAN	sp|O15382|BCAT2_HUMAN	7	7	7	sp|O15382|BCAT2_HUMAN Branched-chain-amino-acid aminotransferase, mitochondrial OS=Homo sapiens OX=9606 GN=BCAT2 PE=1 SV=2	1	7	7	7	1	1	1	1	1	0	3	4	4	2	2	2	3	2	3	4	6	4	1	1	1	1	1	0	3	4	4	2	2	2	3	2	3	4	6	4	1	1	1	1
sp|O15400|STX7_HUMAN	sp|O15400|STX7_HUMAN	5	5	5	sp|O15400|STX7_HUMAN Syntaxin-7 OS=Homo sapiens OX=9606 GN=STX7 PE=1 SV=4	1	5	5	5	2	1	2	2	1	2	2	1	2	2	1	2	3	3	4	3	4	3	2	1	2	2	1	2	2	1	2	2	1	2	3	3	4	3	4	3	2	1	2	2
sp|O15427|MOT4_HUMAN	sp|O15427|MOT4_HUMAN	4	4	4	sp|O15427|MOT4_HUMAN Monocarboxylate transporter 4 OS=Homo sapiens OX=9606 GN=SLC16A3 PE=1 SV=1	1	4	4	4	2	3	2	1	3	2	0	0	0	0	0	0	0	0	0	1	0	0	2	3	2	1	3	2	0	0	0	0	0	0	0	0	0	1	0	0	2	3	2	1
sp|O15438|MRP3_HUMAN	sp|O15438|MRP3_HUMAN	1	1	1	sp|O15438|MRP3_HUMAN ATP-binding cassette sub-family C member 3 OS=Homo sapiens OX=9606 GN=ABCC3 PE=1 SV=3	1	1	1	1	0	0	0	0	1	0	0	0	0	0	0	0	0	0	0	0	0	0	0	0	0	0	1	0	0	0	0	0	0	0	0	0	0	0	0	0	0	0	0	0
sp|O15439|MRP4_HUMAN	sp|O15439|MRP4_HUMAN	2	2	2	sp|O15439|MRP4_HUMAN ATP-binding cassette sub-family C member 4 OS=Homo sapiens OX=9606 GN=ABCC4 PE=1 SV=3	1	2	2	2	1	0	0	1	0	0	0	0	0	0	0	0	0	0	0	0	0	0	1	0	0	1	0	0	0	0	0	0	0	0	0	0	0	0	0	0	1	0	0	1
sp|O15460|P4HA2_HUMAN	sp|O15460|P4HA2_HUMAN	6	6	6	sp|O15460|P4HA2_HUMAN Prolyl 4-hydroxylase subunit alpha-2 OS=Homo sapiens OX=9606 GN=P4HA2 PE=1 SV=1	1	6	6	6	1	0	1	2	1	1	0	0	0	0	0	0	2	3	3	3	3	3	1	0	1	2	1	1	0	0	0	0	0	0	2	3	3	3	3	3	1	0	1	2
sp|O15484|CAN5_HUMAN	sp|O15484|CAN5_HUMAN	1	1	1	sp|O15484|CAN5_HUMAN Calpain-5 OS=Homo sapiens OX=9606 GN=CAPN5 PE=1 SV=2	1	1	1	1	0	0	0	0	0	0	0	1	0	0	0	1	0	0	0	0	0	0	0	0	0	0	0	0	0	1	0	0	0	1	0	0	0	0	0	0	0	0	0	0
sp|O15498|YKT6_HUMAN	sp|O15498|YKT6_HUMAN	4	4	4	sp|O15498|YKT6_HUMAN Synaptobrevin homolog YKT6 OS=Homo sapiens OX=9606 GN=YKT6 PE=1 SV=1	1	4	4	4	1	1	0	0	0	1	0	0	0	0	0	0	2	3	2	2	1	2	1	1	0	0	0	1	0	0	0	0	0	0	2	3	2	2	1	2	1	1	0	0
sp|O15511|ARPC5_HUMAN	sp|O15511|ARPC5_HUMAN	4	4	4	sp|O15511|ARPC5_HUMAN Actin-related protein 2/3 complex subunit 5 OS=Homo sapiens OX=9606 GN=ARPC5 PE=1 SV=3	1	4	4	4	3	3	2	2	2	4	3	3	3	3	3	3	3	3	3	3	3	3	3	3	2	2	2	4	3	3	3	3	3	3	3	3	3	3	3	3	3	3	2	2
sp|O15514|RPB4_HUMAN	sp|O15514|RPB4_HUMAN	1	1	1	sp|O15514|RPB4_HUMAN DNA-directed RNA polymerase II subunit RPB4 OS=Homo sapiens OX=9606 GN=POLR2D PE=1 SV=1	1	1	1	1	0	0	1	0	0	0	0	0	0	0	0	0	0	0	0	0	0	0	0	0	1	0	0	0	0	0	0	0	0	0	0	0	0	0	0	0	0	0	1	0
sp|O15533|TPSN_HUMAN	sp|O15533|TPSN_HUMAN	3	3	3	sp|O15533|TPSN_HUMAN Tapasin OS=Homo sapiens OX=9606 GN=TAPBP PE=1 SV=1	1	3	3	3	1	1	1	1	1	1	0	0	0	0	0	0	1	1	1	2	2	1	1	1	1	1	1	1	0	0	0	0	0	0	1	1	1	2	2	1	1	1	1	1
sp|O15551|CLD3_HUMAN;sp|O14493|CLD4_HUMAN;sp|O95484|CLD9_HUMAN	sp|O15551|CLD3_HUMAN;sp|O14493|CLD4_HUMAN;sp|O95484|CLD9_HUMAN	2;1;1	2;1;1	1;0;0	sp|O15551|CLD3_HUMAN Claudin-3 OS=Homo sapiens OX=9606 GN=CLDN3 PE=1 SV=1;sp|O14493|CLD4_HUMAN Claudin-4 OS=Homo sapiens OX=9606 GN=CLDN4 PE=1 SV=1;sp|O95484|CLD9_HUMAN Claudin-9 OS=Homo sapiens OX=9606 GN=CLDN9 PE=1 SV=1	3	2	2	1	2	2	2	2	2	2	0	0	0	0	0	0	0	0	0	0	0	0	2	2	2	2	2	2	0	0	0	0	0	0	0	0	0	0	0	0	1	1	1	1
sp|O43143|DHX15_HUMAN	sp|O43143|DHX15_HUMAN	17	17	17	sp|O43143|DHX15_HUMAN Pre-mRNA-splicing factor ATP-dependent RNA helicase DHX15 OS=Homo sapiens OX=9606 GN=DHX15 PE=1 SV=2	1	17	17	17	7	10	6	8	8	8	0	0	1	2	0	1	8	7	9	9	9	10	7	10	6	8	8	8	0	0	1	2	0	1	8	7	9	9	9	10	7	10	6	8
sp|O43148|MCES_HUMAN	sp|O43148|MCES_HUMAN	3	3	3	sp|O43148|MCES_HUMAN mRNA cap guanine-N7 methyltransferase OS=Homo sapiens OX=9606 GN=RNMT PE=1 SV=1	1	3	3	3	0	0	1	1	0	2	0	0	0	0	0	0	0	0	0	0	0	0	0	0	1	1	0	2	0	0	0	0	0	0	0	0	0	0	0	0	0	0	1	1
sp|O43169|CYB5B_HUMAN	sp|O43169|CYB5B_HUMAN	5	5	5	sp|O43169|CYB5B_HUMAN Cytochrome b5 type B OS=Homo sapiens OX=9606 GN=CYB5B PE=1 SV=3	1	5	5	5	5	5	5	5	5	5	1	1	1	0	1	1	4	3	4	4	4	4	5	5	5	5	5	5	1	1	1	0	1	1	4	3	4	4	4	4	5	5	5	5
sp|O43175|SERA_HUMAN	sp|O43175|SERA_HUMAN	15	15	15	sp|O43175|SERA_HUMAN D-3-phosphoglycerate dehydrogenase OS=Homo sapiens OX=9606 GN=PHGDH PE=1 SV=4	1	15	15	15	7	5	7	6	6	8	12	11	10	11	10	11	11	11	11	10	13	9	7	5	7	6	6	8	12	11	10	11	10	11	11	11	11	10	13	9	7	5	7	6
sp|O43237|DC1L2_HUMAN	sp|O43237|DC1L2_HUMAN	9	9	8	sp|O43237|DC1L2_HUMAN Cytoplasmic dynein 1 light intermediate chain 2 OS=Homo sapiens OX=9606 GN=DYNC1LI2 PE=1 SV=1	1	9	9	8	4	5	5	7	5	4	0	0	1	0	0	0	2	4	4	4	2	5	4	5	5	7	5	4	0	0	1	0	0	0	2	4	4	4	2	5	4	4	5	6
sp|O43240|KLK10_HUMAN	sp|O43240|KLK10_HUMAN	4	4	4	sp|O43240|KLK10_HUMAN Kallikrein-10 OS=Homo sapiens OX=9606 GN=KLK10 PE=1 SV=3	1	4	4	4	0	0	0	0	0	0	1	2	2	1	3	1	1	0	0	0	0	0	0	0	0	0	0	0	1	2	2	1	3	1	1	0	0	0	0	0	0	0	0	0
sp|O43242|PSMD3_HUMAN	sp|O43242|PSMD3_HUMAN	12	12	12	sp|O43242|PSMD3_HUMAN 26S proteasome non-ATPase regulatory subunit 3 OS=Homo sapiens OX=9606 GN=PSMD3 PE=1 SV=2	1	12	12	12	7	7	7	6	7	7	3	2	3	3	2	3	7	6	5	6	6	6	7	7	7	6	7	7	3	2	3	3	2	3	7	6	5	6	6	6	7	7	7	6
sp|O43252|PAPS1_HUMAN	sp|O43252|PAPS1_HUMAN	1	1	1	sp|O43252|PAPS1_HUMAN Bifunctional 3-phosphoadenosine 5-phosphosulfate synthase 1 OS=Homo sapiens OX=9606 GN=PAPSS1 PE=1 SV=2	1	1	1	1	0	0	0	1	0	0	0	0	0	0	0	0	0	0	0	0	0	0	0	0	0	1	0	0	0	0	0	0	0	0	0	0	0	0	0	0	0	0	0	1
sp|O43264|ZW10_HUMAN	sp|O43264|ZW10_HUMAN	6	6	6	sp|O43264|ZW10_HUMAN Centromere/kinetochore protein zw10 homolog OS=Homo sapiens OX=9606 GN=ZW10 PE=1 SV=3	1	6	6	6	1	2	1	2	1	1	1	1	1	1	1	1	2	2	2	3	2	4	1	2	1	2	1	1	1	1	1	1	1	1	2	2	2	3	2	4	1	2	1	2
sp|O43278|SPIT1_HUMAN	sp|O43278|SPIT1_HUMAN	4	4	4	sp|O43278|SPIT1_HUMAN Kunitz-type protease inhibitor 1 OS=Homo sapiens OX=9606 GN=SPINT1 PE=1 SV=2	1	4	4	4	3	1	3	2	2	2	0	0	0	0	0	0	2	1	1	2	0	0	3	1	3	2	2	2	0	0	0	0	0	0	2	1	1	2	0	0	3	1	3	2
sp|O43294|TGFI1_HUMAN	sp|O43294|TGFI1_HUMAN	9	9	9	sp|O43294|TGFI1_HUMAN Transforming growth factor beta-1-induced transcript 1 protein OS=Homo sapiens OX=9606 GN=TGFB1I1 PE=1 SV=2	1	9	9	9	6	3	3	5	6	4	4	4	4	7	6	4	1	0	2	2	1	2	6	3	3	5	6	4	4	4	4	7	6	4	1	0	2	2	1	2	6	3	3	5
sp|O43301|HS12A_HUMAN	sp|O43301|HS12A_HUMAN	6	6	6	sp|O43301|HS12A_HUMAN Heat shock 70 kDa protein 12A OS=Homo sapiens OX=9606 GN=HSPA12A PE=1 SV=2	1	6	6	6	2	2	1	2	3	2	2	1	2	2	1	1	0	0	0	0	0	0	2	2	1	2	3	2	2	1	2	2	1	1	0	0	0	0	0	0	2	2	1	2
sp|O43324|MCA3_HUMAN	sp|O43324|MCA3_HUMAN	4	4	4	sp|O43324|MCA3_HUMAN Eukaryotic translation elongation factor 1 epsilon-1 OS=Homo sapiens OX=9606 GN=EEF1E1 PE=1 SV=1	1	4	4	4	3	2	2	1	2	2	2	2	1	2	1	1	1	1	1	1	2	1	3	2	2	1	2	2	2	2	1	2	1	1	1	1	1	1	2	1	3	2	2	1
sp|O43390|HNRPR_HUMAN	sp|O43390|HNRPR_HUMAN	18	14	14	sp|O43390|HNRPR_HUMAN Heterogeneous nuclear ribonucleoprotein R OS=Homo sapiens OX=9606 GN=HNRNPR PE=1 SV=1	1	18	14	14	8	10	8	9	11	10	7	7	7	9	7	9	12	10	12	11	11	12	7	8	6	7	9	8	4	4	4	6	4	5	9	8	9	8	8	9	7	8	6	7
sp|O43396|TXNL1_HUMAN	sp|O43396|TXNL1_HUMAN	9	9	9	sp|O43396|TXNL1_HUMAN Thioredoxin-like protein 1 OS=Homo sapiens OX=9606 GN=TXNL1 PE=1 SV=3	1	9	9	9	4	4	7	4	5	7	3	4	5	4	2	3	6	5	7	6	8	6	4	4	7	4	5	7	3	4	5	4	2	3	6	5	7	6	8	6	4	4	7	4
sp|O43399|TPD54_HUMAN	sp|O43399|TPD54_HUMAN	6	6	6	sp|O43399|TPD54_HUMAN Tumor protein D54 OS=Homo sapiens OX=9606 GN=TPD52L2 PE=1 SV=2	1	6	6	6	1	2	5	2	3	4	2	2	3	3	3	2	4	3	4	4	4	5	1	2	5	2	3	4	2	2	3	3	3	2	4	3	4	4	4	5	1	2	5	2
sp|O43402|EMC8_HUMAN	sp|O43402|EMC8_HUMAN	2	2	2	sp|O43402|EMC8_HUMAN ER membrane protein complex subunit 8 OS=Homo sapiens OX=9606 GN=EMC8 PE=1 SV=1	1	2	2	2	1	1	0	0	0	0	0	0	0	0	0	0	0	1	1	1	1	1	1	1	0	0	0	0	0	0	0	0	0	0	0	1	1	1	1	1	1	1	0	0
sp|O43405|COCH_HUMAN	sp|O43405|COCH_HUMAN	1	1	1	sp|O43405|COCH_HUMAN Cochlin OS=Homo sapiens OX=9606 GN=COCH PE=1 SV=1	1	1	1	1	0	0	0	0	0	0	0	0	0	1	0	0	0	0	0	0	0	0	0	0	0	0	0	0	0	0	0	1	0	0	0	0	0	0	0	0	0	0	0	0
sp|O43414|ERI3_HUMAN	sp|O43414|ERI3_HUMAN	1	1	1	sp|O43414|ERI3_HUMAN ERI1 exoribonuclease 3 OS=Homo sapiens OX=9606 GN=ERI3 PE=1 SV=2	1	1	1	1	0	1	1	0	0	0	1	1	1	1	1	1	1	1	1	1	1	1	0	1	1	0	0	0	1	1	1	1	1	1	1	1	1	1	1	1	0	1	1	0
sp|O43432|IF4G3_HUMAN	sp|O43432|IF4G3_HUMAN	4	1	1	sp|O43432|IF4G3_HUMAN Eukaryotic translation initiation factor 4 gamma 3 OS=Homo sapiens OX=9606 GN=EIF4G3 PE=1 SV=2	1	4	1	1	1	1	2	2	3	3	0	0	0	0	0	0	3	3	3	3	2	3	1	0	0	0	1	1	0	0	0	0	0	0	0	0	0	0	0	0	1	0	0	0
sp|O43447|PPIH_HUMAN	sp|O43447|PPIH_HUMAN	3	3	3	sp|O43447|PPIH_HUMAN Peptidyl-prolyl cis-trans isomerase H OS=Homo sapiens OX=9606 GN=PPIH PE=1 SV=1	1	3	3	3	0	0	0	0	0	0	1	2	1	2	2	1	1	2	1	2	1	2	0	0	0	0	0	0	1	2	1	2	2	1	1	2	1	2	1	2	0	0	0	0
sp|O43488|ARK72_HUMAN;sp|Q8NHP1|ARK74_HUMAN;sp|O95154|ARK73_HUMAN	sp|O43488|ARK72_HUMAN	7;2;1	7;2;1	7;2;1	sp|O43488|ARK72_HUMAN Aflatoxin B1 aldehyde reductase member 2 OS=Homo sapiens OX=9606 GN=AKR7A2 PE=1 SV=3	3	7	7	7	5	4	3	3	2	4	6	5	6	6	4	3	2	2	4	2	3	2	5	4	3	3	2	4	6	5	6	6	4	3	2	2	4	2	3	2	5	4	3	3
sp|O43490|PROM1_HUMAN	sp|O43490|PROM1_HUMAN	8	8	8	sp|O43490|PROM1_HUMAN Prominin-1 OS=Homo sapiens OX=9606 GN=PROM1 PE=1 SV=1	1	8	8	8	4	5	5	4	3	2	0	0	0	0	0	0	0	0	0	0	0	0	4	5	5	4	3	2	0	0	0	0	0	0	0	0	0	0	0	0	4	5	5	4
sp|O43491|E41L2_HUMAN	sp|O43491|E41L2_HUMAN	9	9	8	sp|O43491|E41L2_HUMAN Band 4.1-like protein 2 OS=Homo sapiens OX=9606 GN=EPB41L2 PE=1 SV=1	1	9	9	8	1	2	1	1	2	2	4	6	5	4	7	6	1	1	1	1	1	1	1	2	1	1	2	2	4	6	5	4	7	6	1	1	1	1	1	1	1	2	1	1
sp|O43504|LTOR5_HUMAN	sp|O43504|LTOR5_HUMAN	3	3	3	sp|O43504|LTOR5_HUMAN Ragulator complex protein LAMTOR5 OS=Homo sapiens OX=9606 GN=LAMTOR5 PE=1 SV=1	1	3	3	3	3	3	3	3	3	3	1	1	2	1	1	2	3	3	2	3	3	3	3	3	3	3	3	3	1	1	2	1	1	2	3	3	2	3	3	3	3	3	3	3
sp|O43548|TGM5_HUMAN	sp|O43548|TGM5_HUMAN	1	1	1	sp|O43548|TGM5_HUMAN Protein-glutamine gamma-glutamyltransferase 5 OS=Homo sapiens OX=9606 GN=TGM5 PE=1 SV=4	1	1	1	1	0	0	0	0	0	0	0	0	1	0	0	0	1	0	1	1	0	0	0	0	0	0	0	0	0	0	1	0	0	0	1	0	1	1	0	0	0	0	0	0
sp|O43570|CAH12_HUMAN	sp|O43570|CAH12_HUMAN	3	3	3	sp|O43570|CAH12_HUMAN Carbonic anhydrase 12 OS=Homo sapiens OX=9606 GN=CA12 PE=1 SV=1	1	3	3	3	0	0	0	0	0	0	0	0	1	0	0	0	1	1	1	0	3	1	0	0	0	0	0	0	0	0	1	0	0	0	1	1	1	0	3	1	0	0	0	0
sp|O43583|DENR_HUMAN	sp|O43583|DENR_HUMAN	4	4	4	sp|O43583|DENR_HUMAN Density-regulated protein OS=Homo sapiens OX=9606 GN=DENR PE=1 SV=2	1	4	4	4	0	0	1	1	2	1	0	0	0	0	0	0	1	1	0	0	1	1	0	0	1	1	2	1	0	0	0	0	0	0	1	1	0	0	1	1	0	0	1	1
sp|O43592|XPOT_HUMAN	sp|O43592|XPOT_HUMAN	5	5	5	sp|O43592|XPOT_HUMAN Exportin-T OS=Homo sapiens OX=9606 GN=XPOT PE=1 SV=2	1	5	5	5	2	1	1	0	1	1	0	0	0	0	0	0	2	1	2	1	1	1	2	1	1	0	1	1	0	0	0	0	0	0	2	1	2	1	1	1	2	1	1	0
sp|O43598|DNPH1_HUMAN	sp|O43598|DNPH1_HUMAN	3	3	3	sp|O43598|DNPH1_HUMAN 2-deoxynucleoside 5-phosphate N-hydrolase 1 OS=Homo sapiens OX=9606 GN=DNPH1 PE=1 SV=1	1	3	3	3	2	1	1	2	1	1	0	0	0	0	0	1	2	1	1	1	2	2	2	1	1	2	1	1	0	0	0	0	0	1	2	1	1	1	2	2	2	1	1	2
sp|O43615|TIM44_HUMAN	sp|O43615|TIM44_HUMAN	4	4	4	sp|O43615|TIM44_HUMAN Mitochondrial import inner membrane translocase subunit TIM44 OS=Homo sapiens OX=9606 GN=TIMM44 PE=1 SV=2	1	4	4	4	2	1	2	1	1	2	1	1	1	1	1	1	0	2	2	1	1	1	2	1	2	1	1	2	1	1	1	1	1	1	0	2	2	1	1	1	2	1	2	1
sp|O43617|TPPC3_HUMAN	sp|O43617|TPPC3_HUMAN	4	4	4	sp|O43617|TPPC3_HUMAN Trafficking protein particle complex subunit 3 OS=Homo sapiens OX=9606 GN=TRAPPC3 PE=1 SV=1	1	4	4	4	1	2	2	2	2	0	0	1	0	2	2	0	2	3	2	2	2	2	1	2	2	2	2	0	0	1	0	2	2	0	2	3	2	2	2	2	1	2	2	2
sp|O43639|NCK2_HUMAN	sp|O43639|NCK2_HUMAN	2	2	2	sp|O43639|NCK2_HUMAN Cytoplasmic protein NCK2 OS=Homo sapiens OX=9606 GN=NCK2 PE=1 SV=2	1	2	2	2	2	1	1	2	1	1	1	1	1	1	1	1	1	1	1	1	1	1	2	1	1	2	1	1	1	1	1	1	1	1	1	1	1	1	1	1	2	1	1	2
sp|O43657|TSN6_HUMAN	sp|O43657|TSN6_HUMAN	2	2	2	sp|O43657|TSN6_HUMAN Tetraspanin-6 OS=Homo sapiens OX=9606 GN=TSPAN6 PE=1 SV=1	1	2	2	2	0	1	0	0	2	1	0	0	0	0	0	0	0	0	0	0	0	0	0	1	0	0	2	1	0	0	0	0	0	0	0	0	0	0	0	0	0	1	0	0
sp|O43660|PLRG1_HUMAN	sp|O43660|PLRG1_HUMAN	1	1	1	sp|O43660|PLRG1_HUMAN Pleiotropic regulator 1 OS=Homo sapiens OX=9606 GN=PLRG1 PE=1 SV=1	1	1	1	1	0	0	0	0	0	0	0	0	0	0	0	0	0	1	0	1	1	0	0	0	0	0	0	0	0	0	0	0	0	0	0	1	0	1	1	0	0	0	0	0
sp|O43670|ZN207_HUMAN	sp|O43670|ZN207_HUMAN	2	2	2	sp|O43670|ZN207_HUMAN BUB3-interacting and GLEBS motif-containing protein ZNF207 OS=Homo sapiens OX=9606 GN=ZNF207 PE=1 SV=1	1	2	2	2	0	0	0	0	0	0	0	0	0	0	0	0	1	0	1	0	0	1	0	0	0	0	0	0	0	0	0	0	0	0	1	0	1	0	0	1	0	0	0	0
sp|O43674|NDUB5_HUMAN	sp|O43674|NDUB5_HUMAN	3	3	3	sp|O43674|NDUB5_HUMAN NADH dehydrogenase [ubiquinone] 1 beta subcomplex subunit 5, mitochondrial OS=Homo sapiens OX=9606 GN=NDUFB5 PE=1 SV=1	1	3	3	3	0	2	0	0	1	0	0	0	0	0	0	0	0	0	0	0	0	0	0	2	0	0	1	0	0	0	0	0	0	0	0	0	0	0	0	0	0	2	0	0
sp|O43676|NDUB3_HUMAN	sp|O43676|NDUB3_HUMAN	2	2	2	sp|O43676|NDUB3_HUMAN NADH dehydrogenase [ubiquinone] 1 beta subcomplex subunit 3 OS=Homo sapiens OX=9606 GN=NDUFB3 PE=1 SV=3	1	2	2	2	2	1	2	1	1	1	0	0	0	0	0	0	0	1	0	0	0	0	2	1	2	1	1	1	0	0	0	0	0	0	0	1	0	0	0	0	2	1	2	1
sp|O43678|NDUA2_HUMAN	sp|O43678|NDUA2_HUMAN	1	1	1	sp|O43678|NDUA2_HUMAN NADH dehydrogenase [ubiquinone] 1 alpha subcomplex subunit 2 OS=Homo sapiens OX=9606 GN=NDUFA2 PE=1 SV=3	1	1	1	1	1	1	0	1	1	1	1	1	1	1	1	1	0	0	0	0	0	0	1	1	0	1	1	1	1	1	1	1	1	1	0	0	0	0	0	0	1	1	0	1
sp|O43681|GET3_HUMAN	sp|O43681|GET3_HUMAN	9	9	9	sp|O43681|GET3_HUMAN ATPase GET3 OS=Homo sapiens OX=9606 GN=GET3 PE=1 SV=2	1	9	9	9	5	3	5	5	7	5	2	4	1	2	2	2	8	8	8	8	8	6	5	3	5	5	7	5	2	4	1	2	2	2	8	8	8	8	8	6	5	3	5	5
sp|O43684|BUB3_HUMAN	sp|O43684|BUB3_HUMAN	9	9	9	sp|O43684|BUB3_HUMAN Mitotic checkpoint protein BUB3 OS=Homo sapiens OX=9606 GN=BUB3 PE=1 SV=1	1	9	9	9	3	3	3	3	3	3	1	1	1	1	0	0	6	4	4	5	3	4	3	3	3	3	3	3	1	1	1	1	0	0	6	4	4	5	3	4	3	3	3	3
sp|O43688|PLPP2_HUMAN	sp|O43688|PLPP2_HUMAN	2	2	2	sp|O43688|PLPP2_HUMAN Phospholipid phosphatase 2 OS=Homo sapiens OX=9606 GN=PLPP2 PE=1 SV=1	1	2	2	2	1	2	0	1	1	1	0	0	0	0	0	0	0	0	0	0	1	1	1	2	0	1	1	1	0	0	0	0	0	0	0	0	0	0	1	1	1	2	0	1
sp|O43707|ACTN4_HUMAN	sp|O43707|ACTN4_HUMAN	60	60	41	sp|O43707|ACTN4_HUMAN Alpha-actinin-4 OS=Homo sapiens OX=9606 GN=ACTN4 PE=1 SV=2	1	60	60	41	50	49	53	52	50	53	48	46	45	47	43	44	51	51	51	51	50	48	50	49	53	52	50	53	48	46	45	47	43	44	51	51	51	51	50	48	36	35	39	37
sp|O43708|MAAI_HUMAN	sp|O43708|MAAI_HUMAN	3	3	3	sp|O43708|MAAI_HUMAN Maleylacetoacetate isomerase OS=Homo sapiens OX=9606 GN=GSTZ1 PE=1 SV=3	1	3	3	3	1	1	1	1	1	2	1	1	1	1	1	2	2	2	2	2	2	1	1	1	1	1	1	2	1	1	1	1	1	2	2	2	2	2	2	1	1	1	1	1
sp|O43747|AP1G1_HUMAN	sp|O43747|AP1G1_HUMAN	14	14	14	sp|O43747|AP1G1_HUMAN AP-1 complex subunit gamma-1 OS=Homo sapiens OX=9606 GN=AP1G1 PE=1 SV=5	1	14	14	14	9	8	9	7	10	8	1	1	2	2	1	2	6	8	5	8	6	6	9	8	9	7	10	8	1	1	2	2	1	2	6	8	5	8	6	6	9	8	9	7
sp|O43752|STX6_HUMAN	sp|O43752|STX6_HUMAN	2	2	2	sp|O43752|STX6_HUMAN Syntaxin-6 OS=Homo sapiens OX=9606 GN=STX6 PE=1 SV=1	1	2	2	2	1	1	2	1	1	1	0	0	1	0	0	0	1	1	1	1	1	1	1	1	2	1	1	1	0	0	1	0	0	0	1	1	1	1	1	1	1	1	2	1
sp|O43760|SNG2_HUMAN	sp|O43760|SNG2_HUMAN	2	2	2	sp|O43760|SNG2_HUMAN Synaptogyrin-2 OS=Homo sapiens OX=9606 GN=SYNGR2 PE=1 SV=1	1	2	2	2	2	1	1	2	1	1	2	0	0	1	0	1	2	2	2	2	2	2	2	1	1	2	1	1	2	0	0	1	0	1	2	2	2	2	2	2	2	1	1	2
sp|O43765|SGTA_HUMAN	sp|O43765|SGTA_HUMAN	4	4	4	sp|O43765|SGTA_HUMAN Small glutamine-rich tetratricopeptide repeat-containing protein alpha OS=Homo sapiens OX=9606 GN=SGTA PE=1 SV=1	1	4	4	4	1	3	4	1	3	1	3	2	1	1	1	1	1	2	3	2	2	3	1	3	4	1	3	1	3	2	1	1	1	1	1	2	3	2	2	3	1	3	4	1
sp|O43768|ENSA_HUMAN	sp|O43768|ENSA_HUMAN	1	1	1	sp|O43768|ENSA_HUMAN Alpha-endosulfine OS=Homo sapiens OX=9606 GN=ENSA PE=1 SV=1	1	1	1	1	0	0	0	0	0	0	0	1	0	0	0	0	1	1	1	1	1	1	0	0	0	0	0	0	0	1	0	0	0	0	1	1	1	1	1	1	0	0	0	0
sp|O43772|MCAT_HUMAN	sp|O43772|MCAT_HUMAN	3	3	3	sp|O43772|MCAT_HUMAN Mitochondrial carnitine/acylcarnitine carrier protein OS=Homo sapiens OX=9606 GN=SLC25A20 PE=1 SV=1	1	3	3	3	1	1	3	2	1	3	0	0	0	0	0	0	0	0	0	0	0	0	1	1	3	2	1	3	0	0	0	0	0	0	0	0	0	0	0	0	1	1	3	2
sp|O43776|SYNC_HUMAN	sp|O43776|SYNC_HUMAN	13	13	13	sp|O43776|SYNC_HUMAN Asparagine--tRNA ligase, cytoplasmic OS=Homo sapiens OX=9606 GN=NARS1 PE=1 SV=1	1	13	13	13	8	8	9	6	9	7	5	3	2	3	3	4	6	8	8	7	6	8	8	8	9	6	9	7	5	3	2	3	3	4	6	8	8	7	6	8	8	8	9	6
sp|O43795|MYO1B_HUMAN	sp|O43795|MYO1B_HUMAN	10	10	9	sp|O43795|MYO1B_HUMAN Unconventional myosin-Ib OS=Homo sapiens OX=9606 GN=MYO1B PE=1 SV=3	1	10	10	9	4	2	2	3	1	2	0	0	1	0	1	1	6	6	6	6	9	5	4	2	2	3	1	2	0	0	1	0	1	1	6	6	6	6	9	5	3	1	1	2
sp|O43809|CPSF5_HUMAN	sp|O43809|CPSF5_HUMAN	6	6	6	sp|O43809|CPSF5_HUMAN Cleavage and polyadenylation specificity factor subunit 5 OS=Homo sapiens OX=9606 GN=NUDT21 PE=1 SV=1	1	6	6	6	2	2	2	2	2	3	2	3	2	3	3	2	4	4	3	3	3	3	2	2	2	2	2	3	2	3	2	3	3	2	4	4	3	3	3	3	2	2	2	2
sp|O43813|LANC1_HUMAN	sp|O43813|LANC1_HUMAN	10	10	10	sp|O43813|LANC1_HUMAN Glutathione S-transferase LANCL1 OS=Homo sapiens OX=9606 GN=LANCL1 PE=1 SV=1	1	10	10	10	3	3	3	4	4	5	5	6	7	7	6	7	6	4	5	5	4	6	3	3	3	4	4	5	5	6	7	7	6	7	6	4	5	5	4	6	3	3	3	4
sp|O43815|STRN_HUMAN	sp|O43815|STRN_HUMAN	4	4	4	sp|O43815|STRN_HUMAN Striatin OS=Homo sapiens OX=9606 GN=STRN PE=1 SV=4	1	4	4	4	0	1	1	1	1	1	0	0	0	1	0	0	2	1	1	1	2	3	0	1	1	1	1	1	0	0	0	1	0	0	2	1	1	1	2	3	0	1	1	1
sp|O43819|SCO2_HUMAN	sp|O43819|SCO2_HUMAN	1	1	1	sp|O43819|SCO2_HUMAN Protein SCO2 homolog, mitochondrial OS=Homo sapiens OX=9606 GN=SCO2 PE=1 SV=3	1	1	1	1	0	0	0	0	0	1	0	0	0	0	0	0	0	0	0	0	0	0	0	0	0	0	0	1	0	0	0	0	0	0	0	0	0	0	0	0	0	0	0	0
sp|O43837|IDH3B_HUMAN	sp|O43837|IDH3B_HUMAN	10	10	10	sp|O43837|IDH3B_HUMAN Isocitrate dehydrogenase [NAD] subunit beta, mitochondrial OS=Homo sapiens OX=9606 GN=IDH3B PE=1 SV=2	1	10	10	10	3	3	2	4	4	4	3	1	2	3	2	2	4	6	5	5	5	4	3	3	2	4	4	4	3	1	2	3	2	2	4	6	5	5	5	4	3	3	2	4
sp|O43847|NRDC_HUMAN	sp|O43847|NRDC_HUMAN	4	4	4	sp|O43847|NRDC_HUMAN Nardilysin OS=Homo sapiens OX=9606 GN=NRDC PE=1 SV=3	1	4	4	4	1	1	1	0	1	1	0	0	0	0	0	0	0	1	1	3	0	2	1	1	1	0	1	1	0	0	0	0	0	0	0	1	1	3	0	2	1	1	1	0
sp|O43852|CALU_HUMAN	sp|O43852|CALU_HUMAN	15	15	15	sp|O43852|CALU_HUMAN Calumenin OS=Homo sapiens OX=9606 GN=CALU PE=1 SV=2	1	15	15	15	9	8	9	8	9	10	4	3	3	3	3	3	11	11	13	11	12	11	9	8	9	8	9	10	4	3	3	3	3	3	11	11	13	11	12	11	9	8	9	8
sp|O43865|SAHH2_HUMAN	sp|O43865|SAHH2_HUMAN	6	6	3	sp|O43865|SAHH2_HUMAN S-adenosylhomocysteine hydrolase-like protein 1 OS=Homo sapiens OX=9606 GN=AHCYL1 PE=1 SV=2	1	6	6	3	2	6	4	3	3	3	1	1	0	1	1	1	1	5	5	4	5	2	2	6	4	3	3	3	1	1	0	1	1	1	1	5	5	4	5	2	1	3	3	2
sp|O43866|CD5L_HUMAN	sp|O43866|CD5L_HUMAN	4	4	4	sp|O43866|CD5L_HUMAN CD5 antigen-like OS=Homo sapiens OX=9606 GN=CD5L PE=1 SV=1	1	4	4	4	2	2	2	2	2	2	2	2	3	2	1	2	2	2	2	3	2	3	2	2	2	2	2	2	2	2	3	2	1	2	2	2	2	3	2	3	2	2	2	2
sp|O43896|KIF1C_HUMAN	sp|O43896|KIF1C_HUMAN	2	2	2	sp|O43896|KIF1C_HUMAN Kinesin-like protein KIF1C OS=Homo sapiens OX=9606 GN=KIF1C PE=1 SV=3	1	2	2	2	0	2	1	0	0	1	0	0	0	0	0	0	0	0	0	0	0	0	0	2	1	0	0	1	0	0	0	0	0	0	0	0	0	0	0	0	0	2	1	0
sp|O43920|NDUS5_HUMAN	sp|O43920|NDUS5_HUMAN	3	3	3	sp|O43920|NDUS5_HUMAN NADH dehydrogenase [ubiquinone] iron-sulfur protein 5 OS=Homo sapiens OX=9606 GN=NDUFS5 PE=1 SV=3	1	3	3	3	1	1	1	0	1	1	1	1	2	1	1	1	2	2	1	0	0	0	1	1	1	0	1	1	1	1	2	1	1	1	2	2	1	0	0	0	1	1	1	0
sp|O43924|PDE6D_HUMAN	sp|O43924|PDE6D_HUMAN	1	1	1	sp|O43924|PDE6D_HUMAN Retinal rod rhodopsin-sensitive cGMP 3,5-cyclic phosphodiesterase subunit delta OS=Homo sapiens OX=9606 GN=PDE6D PE=1 SV=1	1	1	1	1	0	0	0	0	0	0	0	1	1	0	0	1	1	1	0	1	0	0	0	0	0	0	0	0	0	1	1	0	0	1	1	1	0	1	0	0	0	0	0	0
sp|O60216|RAD21_HUMAN	sp|O60216|RAD21_HUMAN	3	3	3	sp|O60216|RAD21_HUMAN Double-strand-break repair protein rad21 homolog OS=Homo sapiens OX=9606 GN=RAD21 PE=1 SV=2	1	3	3	3	1	1	1	1	1	1	0	0	0	1	0	0	1	2	2	1	2	2	1	1	1	1	1	1	0	0	0	1	0	0	1	2	2	1	2	2	1	1	1	1
sp|O60218|AK1BA_HUMAN	sp|O60218|AK1BA_HUMAN	17	17	10	sp|O60218|AK1BA_HUMAN Aldo-keto reductase family 1 member B10 OS=Homo sapiens OX=9606 GN=AKR1B10 PE=1 SV=2	1	17	17	10	8	7	9	8	8	8	5	6	7	7	8	6	16	16	16	15	15	15	8	7	9	8	8	8	5	6	7	7	8	6	16	16	16	15	15	15	5	5	5	4
sp|O60220|TIM8A_HUMAN	sp|O60220|TIM8A_HUMAN	2	2	2	sp|O60220|TIM8A_HUMAN Mitochondrial import inner membrane translocase subunit Tim8 A OS=Homo sapiens OX=9606 GN=TIMM8A PE=1 SV=1	1	2	2	2	0	1	1	0	1	1	0	0	1	0	1	1	0	0	0	0	0	0	0	1	1	0	1	1	0	0	1	0	1	1	0	0	0	0	0	0	0	1	1	0
sp|O60231|DHX16_HUMAN	sp|O60231|DHX16_HUMAN	1	1	1	sp|O60231|DHX16_HUMAN Pre-mRNA-splicing factor ATP-dependent RNA helicase DHX16 OS=Homo sapiens OX=9606 GN=DHX16 PE=1 SV=2	1	1	1	1	0	0	0	0	0	1	0	0	0	0	0	0	0	1	0	0	0	1	0	0	0	0	0	1	0	0	0	0	0	0	0	1	0	0	0	1	0	0	0	0
sp|O60232|ZNRD2_HUMAN	sp|O60232|ZNRD2_HUMAN	2	2	2	sp|O60232|ZNRD2_HUMAN Protein ZNRD2 OS=Homo sapiens OX=9606 GN=ZNRD2 PE=1 SV=1	1	2	2	2	0	0	0	0	0	0	0	0	0	0	0	0	0	0	0	0	1	1	0	0	0	0	0	0	0	0	0	0	0	0	0	0	0	0	1	1	0	0	0	0
sp|O60234|GMFG_HUMAN	sp|O60234|GMFG_HUMAN	2	1	1	sp|O60234|GMFG_HUMAN Glia maturation factor gamma OS=Homo sapiens OX=9606 GN=GMFG PE=1 SV=1	1	2	1	1	1	1	1	1	1	2	0	0	0	0	0	0	1	1	1	1	2	1	0	0	0	0	0	1	0	0	0	0	0	0	0	0	0	0	1	0	0	0	0	0
sp|O60235|TM11D_HUMAN	sp|O60235|TM11D_HUMAN	6	6	6	sp|O60235|TM11D_HUMAN Transmembrane protease serine 11D OS=Homo sapiens OX=9606 GN=TMPRSS11D PE=1 SV=1	1	6	6	6	0	0	0	0	0	0	0	1	0	0	0	0	5	6	4	5	5	6	0	0	0	0	0	0	0	1	0	0	0	0	5	6	4	5	5	6	0	0	0	0
sp|O60237|MYPT2_HUMAN	sp|O60237|MYPT2_HUMAN	1	1	1	sp|O60237|MYPT2_HUMAN Protein phosphatase 1 regulatory subunit 12B OS=Homo sapiens OX=9606 GN=PPP1R12B PE=1 SV=2	1	1	1	1	0	0	0	0	0	0	1	0	1	1	1	1	0	0	0	0	0	0	0	0	0	0	0	0	1	0	1	1	1	1	0	0	0	0	0	0	0	0	0	0
sp|O60245|PCDH7_HUMAN	sp|O60245|PCDH7_HUMAN	1	1	1	sp|O60245|PCDH7_HUMAN Protocadherin-7 OS=Homo sapiens OX=9606 GN=PCDH7 PE=1 SV=2	1	1	1	1	1	0	1	1	1	1	0	0	0	0	0	0	0	0	0	0	0	0	1	0	1	1	1	1	0	0	0	0	0	0	0	0	0	0	0	0	1	0	1	1
sp|O60256|KPRB_HUMAN	sp|O60256|KPRB_HUMAN	2	2	2	sp|O60256|KPRB_HUMAN Phosphoribosyl pyrophosphate synthase-associated protein 2 OS=Homo sapiens OX=9606 GN=PRPSAP2 PE=1 SV=1	1	2	2	2	1	0	1	1	0	0	0	0	0	0	0	1	2	1	1	1	2	1	1	0	1	1	0	0	0	0	0	0	0	1	2	1	1	1	2	1	1	0	1	1
sp|O60271|JIP4_HUMAN	sp|O60271|JIP4_HUMAN	1	1	1	sp|O60271|JIP4_HUMAN C-Jun-amino-terminal kinase-interacting protein 4 OS=Homo sapiens OX=9606 GN=SPAG9 PE=1 SV=4	1	1	1	1	0	0	0	0	0	0	0	0	0	0	0	0	0	1	0	0	1	0	0	0	0	0	0	0	0	0	0	0	0	0	0	1	0	0	1	0	0	0	0	0
sp|O60306|AQR_HUMAN	sp|O60306|AQR_HUMAN	2	2	2	sp|O60306|AQR_HUMAN RNA helicase aquarius OS=Homo sapiens OX=9606 GN=AQR PE=1 SV=4	1	2	2	2	1	0	0	0	0	0	0	0	0	0	0	0	0	0	0	0	0	1	1	0	0	0	0	0	0	0	0	0	0	0	0	0	0	0	0	1	1	0	0	0
sp|O60313|OPA1_HUMAN	sp|O60313|OPA1_HUMAN	17	17	17	sp|O60313|OPA1_HUMAN Dynamin-like 120 kDa protein, mitochondrial OS=Homo sapiens OX=9606 GN=OPA1 PE=1 SV=3	1	17	17	17	6	4	3	5	5	4	0	0	1	0	1	0	8	10	7	10	12	11	6	4	3	5	5	4	0	0	1	0	1	0	8	10	7	10	12	11	6	4	3	5
sp|O60341|KDM1A_HUMAN	sp|O60341|KDM1A_HUMAN	8	8	8	sp|O60341|KDM1A_HUMAN Lysine-specific histone demethylase 1A OS=Homo sapiens OX=9606 GN=KDM1A PE=1 SV=2	1	8	8	8	2	1	3	1	1	4	0	0	0	0	0	0	1	1	1	1	1	1	2	1	3	1	1	4	0	0	0	0	0	0	1	1	1	1	1	1	2	1	3	1
sp|O60437|PEPL_HUMAN	sp|O60437|PEPL_HUMAN	61	61	61	sp|O60437|PEPL_HUMAN Periplakin OS=Homo sapiens OX=9606 GN=PPL PE=1 SV=4	1	61	61	61	26	28	27	27	24	30	34	35	42	34	36	36	20	21	23	21	21	15	26	28	27	27	24	30	34	35	42	34	36	36	20	21	23	21	21	15	26	28	27	27
sp|O60462|NRP2_HUMAN	sp|O60462|NRP2_HUMAN	3	3	3	sp|O60462|NRP2_HUMAN Neuropilin-2 OS=Homo sapiens OX=9606 GN=NRP2 PE=1 SV=3	1	3	3	3	2	2	1	2	0	0	0	0	0	0	0	0	0	0	0	0	0	0	2	2	1	2	0	0	0	0	0	0	0	0	0	0	0	0	0	0	2	2	1	2
sp|O60476|MA1A2_HUMAN	sp|O60476|MA1A2_HUMAN	2	2	2	sp|O60476|MA1A2_HUMAN Mannosyl-oligosaccharide 1,2-alpha-mannosidase IB OS=Homo sapiens OX=9606 GN=MAN1A2 PE=1 SV=1	1	2	2	2	2	1	2	1	0	0	0	0	0	0	0	0	0	0	0	0	0	0	2	1	2	1	0	0	0	0	0	0	0	0	0	0	0	0	0	0	2	1	2	1
sp|O60487|MPZL2_HUMAN	sp|O60487|MPZL2_HUMAN	2	2	2	sp|O60487|MPZL2_HUMAN Myelin protein zero-like protein 2 OS=Homo sapiens OX=9606 GN=MPZL2 PE=1 SV=1	1	2	2	2	1	2	1	1	1	1	0	0	0	0	0	0	0	1	1	0	1	0	1	2	1	1	1	1	0	0	0	0	0	0	0	1	1	0	1	0	1	2	1	1
sp|O60488|ACSL4_HUMAN	sp|O60488|ACSL4_HUMAN	12	12	10	sp|O60488|ACSL4_HUMAN Long-chain-fatty-acid--CoA ligase 4 OS=Homo sapiens OX=9606 GN=ACSL4 PE=1 SV=2	1	12	12	10	9	9	8	8	8	8	0	0	0	0	0	0	1	2	0	0	1	0	9	9	8	8	8	8	0	0	0	0	0	0	1	2	0	0	1	0	8	8	7	7
sp|O60493|SNX3_HUMAN	sp|O60493|SNX3_HUMAN	4	3	3	sp|O60493|SNX3_HUMAN Sorting nexin-3 OS=Homo sapiens OX=9606 GN=SNX3 PE=1 SV=3	1	4	3	3	1	2	1	2	1	0	1	2	0	1	2	2	3	1	2	3	3	2	1	1	0	1	0	0	1	1	0	1	2	2	2	0	1	2	2	1	1	1	0	1
sp|O60499|STX10_HUMAN	sp|O60499|STX10_HUMAN	1	1	1	sp|O60499|STX10_HUMAN Syntaxin-10 OS=Homo sapiens OX=9606 GN=STX10 PE=1 SV=1	1	1	1	1	1	0	0	1	1	1	1	0	1	0	1	1	0	0	0	0	0	1	1	0	0	1	1	1	1	0	1	0	1	1	0	0	0	0	0	1	1	0	0	1
sp|O60502|OGA_HUMAN	sp|O60502|OGA_HUMAN	2	2	2	sp|O60502|OGA_HUMAN Protein O-GlcNAcase OS=Homo sapiens OX=9606 GN=OGA PE=1 SV=2	1	2	2	2	1	1	1	1	1	1	1	0	0	1	0	0	0	1	1	1	1	1	1	1	1	1	1	1	1	0	0	1	0	0	0	1	1	1	1	1	1	1	1	1
sp|O60504|VINEX_HUMAN	sp|O60504|VINEX_HUMAN	6	6	6	sp|O60504|VINEX_HUMAN Vinexin OS=Homo sapiens OX=9606 GN=SORBS3 PE=1 SV=2	1	6	6	6	0	0	0	1	0	0	4	4	5	2	4	5	1	1	0	0	1	0	0	0	0	1	0	0	4	4	5	2	4	5	1	1	0	0	1	0	0	0	0	1
sp|O60506|HNRPQ_HUMAN	sp|O60506|HNRPQ_HUMAN	22	22	18	sp|O60506|HNRPQ_HUMAN Heterogeneous nuclear ribonucleoprotein Q OS=Homo sapiens OX=9606 GN=SYNCRIP PE=1 SV=2	1	22	22	18	10	12	10	11	10	12	9	7	12	5	7	11	18	17	16	18	16	18	10	12	10	11	10	12	9	7	12	5	7	11	18	17	16	18	16	18	9	10	8	9
sp|O60547|GMDS_HUMAN	sp|O60547|GMDS_HUMAN	5	5	5	sp|O60547|GMDS_HUMAN GDP-mannose 4,6 dehydratase OS=Homo sapiens OX=9606 GN=GMDS PE=1 SV=1	1	5	5	5	4	5	4	4	4	5	0	0	0	0	0	0	2	3	2	3	1	1	4	5	4	4	4	5	0	0	0	0	0	0	2	3	2	3	1	1	4	5	4	4
sp|O60568|PLOD3_HUMAN	sp|O60568|PLOD3_HUMAN	4	4	4	sp|O60568|PLOD3_HUMAN Multifunctional procollagen lysine hydroxylase and glycosyltransferase LH3 OS=Homo sapiens OX=9606 GN=PLOD3 PE=1 SV=1	1	4	4	4	2	4	2	3	4	2	0	0	0	0	0	0	0	0	0	0	0	0	2	4	2	3	4	2	0	0	0	0	0	0	0	0	0	0	0	0	2	4	2	3
sp|O60610|DIAP1_HUMAN	sp|O60610|DIAP1_HUMAN	15	15	15	sp|O60610|DIAP1_HUMAN Protein diaphanous homolog 1 OS=Homo sapiens OX=9606 GN=DIAPH1 PE=1 SV=2	1	15	15	15	4	3	3	4	3	4	1	1	0	0	2	2	4	7	6	7	8	7	4	3	3	4	3	4	1	1	0	0	2	2	4	7	6	7	8	7	4	3	3	4
sp|O60613|SEP15_HUMAN	sp|O60613|SEP15_HUMAN	3	3	3	sp|O60613|SEP15_HUMAN Selenoprotein F OS=Homo sapiens OX=9606 GN=SELENOF PE=1 SV=4	1	3	3	3	1	1	2	1	1	1	1	1	0	1	0	0	0	0	0	1	0	0	1	1	2	1	1	1	1	1	0	1	0	0	0	0	0	1	0	0	1	1	2	1
sp|O60635|TSN1_HUMAN	sp|O60635|TSN1_HUMAN	1	1	1	sp|O60635|TSN1_HUMAN Tetraspanin-1 OS=Homo sapiens OX=9606 GN=TSPAN1 PE=1 SV=2	1	1	1	1	1	0	1	0	1	0	0	0	0	0	0	0	0	0	0	0	0	0	1	0	1	0	1	0	0	0	0	0	0	0	0	0	0	0	0	0	1	0	1	0
sp|O60645|EXOC3_HUMAN	sp|O60645|EXOC3_HUMAN	5	5	5	sp|O60645|EXOC3_HUMAN Exocyst complex component 3 OS=Homo sapiens OX=9606 GN=EXOC3 PE=1 SV=3	1	5	5	5	1	0	1	1	1	0	0	0	0	0	0	0	1	0	1	3	0	1	1	0	1	1	1	0	0	0	0	0	0	0	1	0	1	3	0	1	1	0	1	1
sp|O60664|PLIN3_HUMAN	sp|O60664|PLIN3_HUMAN	17	17	17	sp|O60664|PLIN3_HUMAN Perilipin-3 OS=Homo sapiens OX=9606 GN=PLIN3 PE=1 SV=3	1	17	17	17	11	12	11	13	12	12	9	7	9	11	9	8	14	11	12	11	13	13	11	12	11	13	12	12	9	7	9	11	9	8	14	11	12	11	13	13	11	12	11	13
sp|O60684|IMA7_HUMAN;sp|O15131|IMA6_HUMAN	sp|O60684|IMA7_HUMAN;sp|O15131|IMA6_HUMAN	8;6	8;6	4;3	sp|O60684|IMA7_HUMAN Importin subunit alpha-7 OS=Homo sapiens OX=9606 GN=KPNA6 PE=1 SV=1;sp|O15131|IMA6_HUMAN Importin subunit alpha-6 OS=Homo sapiens OX=9606 GN=KPNA5 PE=1 SV=2	2	8	8	4	2	2	2	3	2	1	2	1	1	2	1	1	3	2	4	4	3	3	2	2	2	3	2	1	2	1	1	2	1	1	3	2	4	4	3	3	1	0	1	1
sp|O60701|UGDH_HUMAN	sp|O60701|UGDH_HUMAN	15	15	15	sp|O60701|UGDH_HUMAN UDP-glucose 6-dehydrogenase OS=Homo sapiens OX=9606 GN=UGDH PE=1 SV=1	1	15	15	15	10	12	9	9	11	11	4	5	4	3	4	4	7	6	7	7	7	6	10	12	9	9	11	11	4	5	4	3	4	4	7	6	7	7	7	6	10	12	9	9
sp|O60716|CTND1_HUMAN	sp|O60716|CTND1_HUMAN	29	29	29	sp|O60716|CTND1_HUMAN Catenin delta-1 OS=Homo sapiens OX=9606 GN=CTNND1 PE=1 SV=1	1	29	29	29	14	14	14	12	14	12	5	5	7	8	8	7	22	24	22	22	21	24	14	14	14	12	14	12	5	5	7	8	8	7	22	24	22	22	21	24	14	14	14	12
sp|O60725|ICMT_HUMAN	sp|O60725|ICMT_HUMAN	1	1	1	sp|O60725|ICMT_HUMAN Protein-S-isoprenylcysteine O-methyltransferase OS=Homo sapiens OX=9606 GN=ICMT PE=1 SV=1	1	1	1	1	1	0	0	1	0	0	0	0	0	0	0	0	0	0	0	0	0	0	1	0	0	1	0	0	0	0	0	0	0	0	0	0	0	0	0	0	1	0	0	1
sp|O60749|SNX2_HUMAN	sp|O60749|SNX2_HUMAN	9	8	8	sp|O60749|SNX2_HUMAN Sorting nexin-2 OS=Homo sapiens OX=9606 GN=SNX2 PE=1 SV=2	1	9	8	8	2	3	4	2	3	2	2	1	2	1	1	1	4	4	4	5	3	3	2	3	4	2	3	2	2	1	2	1	1	1	3	4	4	4	3	3	2	3	4	2
sp|O60760|HPGDS_HUMAN	sp|O60760|HPGDS_HUMAN	1	1	1	sp|O60760|HPGDS_HUMAN Hematopoietic prostaglandin D synthase OS=Homo sapiens OX=9606 GN=HPGDS PE=1 SV=3	1	1	1	1	0	0	0	0	0	0	0	0	0	0	1	0	0	0	0	0	0	0	0	0	0	0	0	0	0	0	0	0	1	0	0	0	0	0	0	0	0	0	0	0
sp|O60762|DPM1_HUMAN	sp|O60762|DPM1_HUMAN	3	3	3	sp|O60762|DPM1_HUMAN Dolichol-phosphate mannosyltransferase subunit 1 OS=Homo sapiens OX=9606 GN=DPM1 PE=1 SV=1	1	3	3	3	2	1	0	2	2	1	0	1	0	0	1	0	1	1	1	1	2	2	2	1	0	2	2	1	0	1	0	0	1	0	1	1	1	1	2	2	2	1	0	2
sp|O60763|USO1_HUMAN	sp|O60763|USO1_HUMAN	18	18	18	sp|O60763|USO1_HUMAN General vesicular transport factor p115 OS=Homo sapiens OX=9606 GN=USO1 PE=1 SV=2	1	18	18	18	9	8	12	8	10	11	1	2	2	1	2	3	9	8	8	11	8	9	9	8	12	8	10	11	1	2	2	1	2	3	9	8	8	11	8	9	9	8	12	8
sp|O60784|TOM1_HUMAN	sp|O60784|TOM1_HUMAN	14	14	14	sp|O60784|TOM1_HUMAN Target of Myb protein 1 OS=Homo sapiens OX=9606 GN=TOM1 PE=1 SV=2	1	14	14	14	6	2	4	4	5	4	4	2	5	1	3	3	4	4	5	3	1	3	6	2	4	4	5	4	4	2	5	1	3	3	4	4	5	3	1	3	6	2	4	4
sp|O60825|F262_HUMAN	sp|O60825|F262_HUMAN	2	2	2	sp|O60825|F262_HUMAN 6-phosphofructo-2-kinase/fructose-2,6-bisphosphatase 2 OS=Homo sapiens OX=9606 GN=PFKFB2 PE=1 SV=2	1	2	2	2	0	2	1	1	1	1	0	0	0	0	0	0	0	1	0	0	1	1	0	2	1	1	1	1	0	0	0	0	0	0	0	1	0	0	1	1	0	2	1	1
sp|O60826|CCD22_HUMAN	sp|O60826|CCD22_HUMAN	5	5	5	sp|O60826|CCD22_HUMAN Coiled-coil domain-containing protein 22 OS=Homo sapiens OX=9606 GN=CCDC22 PE=1 SV=1	1	5	5	5	2	3	2	2	3	2	0	0	0	1	0	0	2	2	0	3	3	2	2	3	2	2	3	2	0	0	0	1	0	0	2	2	0	3	3	2	2	3	2	2
sp|O60828|PQBP1_HUMAN	sp|O60828|PQBP1_HUMAN	2	2	2	sp|O60828|PQBP1_HUMAN Polyglutamine-binding protein 1 OS=Homo sapiens OX=9606 GN=PQBP1 PE=1 SV=1	1	2	2	2	0	0	0	0	0	0	0	0	0	0	0	0	1	0	0	1	1	1	0	0	0	0	0	0	0	0	0	0	0	0	1	0	0	1	1	1	0	0	0	0
sp|O60832|DKC1_HUMAN	sp|O60832|DKC1_HUMAN	10	10	10	sp|O60832|DKC1_HUMAN H/ACA ribonucleoprotein complex subunit DKC1 OS=Homo sapiens OX=9606 GN=DKC1 PE=1 SV=3	1	10	10	10	2	2	3	3	4	2	1	2	3	1	2	1	1	1	1	1	0	1	2	2	3	3	4	2	1	2	3	1	2	1	1	1	1	1	0	1	2	2	3	3
sp|O60841|IF2P_HUMAN	sp|O60841|IF2P_HUMAN	7	7	7	sp|O60841|IF2P_HUMAN Eukaryotic translation initiation factor 5B OS=Homo sapiens OX=9606 GN=EIF5B PE=1 SV=4	1	7	7	7	5	4	4	4	4	4	0	0	1	0	1	1	4	4	4	5	7	6	5	4	4	4	4	4	0	0	1	0	1	1	4	4	4	5	7	6	5	4	4	4
sp|O60858|TRI13_HUMAN	sp|O60858|TRI13_HUMAN	1	1	1	sp|O60858|TRI13_HUMAN E3 ubiquitin-protein ligase TRIM13 OS=Homo sapiens OX=9606 GN=TRIM13 PE=1 SV=2	1	1	1	1	0	0	0	0	0	1	0	0	0	0	0	0	0	0	0	0	0	0	0	0	0	0	0	1	0	0	0	0	0	0	0	0	0	0	0	0	0	0	0	0
sp|O60869|EDF1_HUMAN	sp|O60869|EDF1_HUMAN	1	1	1	sp|O60869|EDF1_HUMAN Endothelial differentiation-related factor 1 OS=Homo sapiens OX=9606 GN=EDF1 PE=1 SV=1	1	1	1	1	1	1	1	1	1	1	1	0	0	0	1	1	1	1	1	1	1	1	1	1	1	1	1	1	1	0	0	0	1	1	1	1	1	1	1	1	1	1	1	1
sp|O60884|DNJA2_HUMAN	sp|O60884|DNJA2_HUMAN	10	10	10	sp|O60884|DNJA2_HUMAN DnaJ homolog subfamily A member 2 OS=Homo sapiens OX=9606 GN=DNAJA2 PE=1 SV=1	1	10	10	10	6	5	5	5	4	6	1	1	3	2	2	2	8	5	7	7	8	8	6	5	5	5	4	6	1	1	3	2	2	2	8	5	7	7	8	8	6	5	5	5
sp|O60888|CUTA_HUMAN	sp|O60888|CUTA_HUMAN	3	3	3	sp|O60888|CUTA_HUMAN Protein CutA OS=Homo sapiens OX=9606 GN=CUTA PE=1 SV=2	1	3	3	3	2	2	2	3	3	2	2	2	2	2	2	2	2	3	2	3	2	2	2	2	2	3	3	2	2	2	2	2	2	2	2	3	2	3	2	2	2	2	2	3
sp|O60925|PFD1_HUMAN	sp|O60925|PFD1_HUMAN	2	2	2	sp|O60925|PFD1_HUMAN Prefoldin subunit 1 OS=Homo sapiens OX=9606 GN=PFDN1 PE=1 SV=2	1	2	2	2	1	1	0	1	2	1	1	1	1	1	1	1	1	2	2	1	2	1	1	1	0	1	2	1	1	1	1	1	1	1	1	2	2	1	2	1	1	1	0	1
sp|O60936|NOL3_HUMAN	sp|O60936|NOL3_HUMAN	2	2	2	sp|O60936|NOL3_HUMAN Nucleolar protein 3 OS=Homo sapiens OX=9606 GN=NOL3 PE=1 SV=2	1	2	2	2	0	0	1	0	0	0	2	0	0	0	0	0	0	0	0	0	0	0	0	0	1	0	0	0	2	0	0	0	0	0	0	0	0	0	0	0	0	0	1	0
sp|O75044|SRGP2_HUMAN	sp|O75044|SRGP2_HUMAN	2	2	2	sp|O75044|SRGP2_HUMAN SLIT-ROBO Rho GTPase-activating protein 2 OS=Homo sapiens OX=9606 GN=SRGAP2 PE=1 SV=3	1	2	2	2	0	1	1	1	0	1	0	0	0	0	0	0	1	1	1	1	0	1	0	1	1	1	0	1	0	0	0	0	0	0	1	1	1	1	0	1	0	1	1	1
sp|O75083|WDR1_HUMAN	sp|O75083|WDR1_HUMAN	25	25	25	sp|O75083|WDR1_HUMAN WD repeat-containing protein 1 OS=Homo sapiens OX=9606 GN=WDR1 PE=1 SV=4	1	25	25	25	20	18	18	20	18	21	16	17	14	12	14	14	18	17	20	20	21	19	20	18	18	20	18	21	16	17	14	12	14	14	18	17	20	20	21	19	20	18	18	20
sp|O75112|LDB3_HUMAN	sp|O75112|LDB3_HUMAN	2	2	2	sp|O75112|LDB3_HUMAN LIM domain-binding protein 3 OS=Homo sapiens OX=9606 GN=LDB3 PE=1 SV=2	1	2	2	2	0	0	0	0	0	0	1	1	1	1	1	0	0	0	0	0	0	0	0	0	0	0	0	0	1	1	1	1	1	0	0	0	0	0	0	0	0	0	0	0
sp|O75113|N4BP1_HUMAN	sp|O75113|N4BP1_HUMAN	2	2	2	sp|O75113|N4BP1_HUMAN NEDD4-binding protein 1 OS=Homo sapiens OX=9606 GN=N4BP1 PE=1 SV=4	1	2	2	2	0	0	0	0	0	0	0	0	0	0	0	0	1	1	1	1	2	1	0	0	0	0	0	0	0	0	0	0	0	0	1	1	1	1	2	1	0	0	0	0
sp|O75131|CPNE3_HUMAN;sp|Q8IYJ1|CPNE9_HUMAN;sp|Q96A23|CPNE4_HUMAN;sp|O95741|CPNE6_HUMAN;sp|Q86YQ8|CPNE8_HUMAN;sp|Q9UBL6|CPNE7_HUMAN	sp|O75131|CPNE3_HUMAN	14;1;1;1;1;1	14;1;1;1;1;1	13;0;0;0;0;0	sp|O75131|CPNE3_HUMAN Copine-3 OS=Homo sapiens OX=9606 GN=CPNE3 PE=1 SV=1	6	14	14	13	3	2	5	5	4	4	3	2	2	2	4	2	8	8	9	10	9	9	3	2	5	5	4	4	3	2	2	2	4	2	8	8	9	10	9	9	2	1	4	4
sp|O75144|ICOSL_HUMAN	sp|O75144|ICOSL_HUMAN	1	1	1	sp|O75144|ICOSL_HUMAN ICOS ligand OS=Homo sapiens OX=9606 GN=ICOSLG PE=1 SV=2	1	1	1	1	0	0	0	0	0	0	1	1	1	1	0	1	0	0	0	0	0	0	0	0	0	0	0	0	1	1	1	1	0	1	0	0	0	0	0	0	0	0	0	0
sp|O75150|BRE1B_HUMAN	sp|O75150|BRE1B_HUMAN	3	2	2	sp|O75150|BRE1B_HUMAN E3 ubiquitin-protein ligase BRE1B OS=Homo sapiens OX=9606 GN=RNF40 PE=1 SV=5	1	3	2	2	0	0	0	0	0	0	0	0	1	1	1	1	1	0	0	1	0	0	0	0	0	0	0	0	0	0	1	1	1	1	0	0	0	1	0	0	0	0	0	0
sp|O75153|CLU_HUMAN	sp|O75153|CLU_HUMAN	1	1	1	sp|O75153|CLU_HUMAN Clustered mitochondria protein homolog OS=Homo sapiens OX=9606 GN=CLUH PE=1 SV=2	1	1	1	1	0	0	0	0	0	0	0	0	0	0	0	0	1	1	1	1	1	1	0	0	0	0	0	0	0	0	0	0	0	0	1	1	1	1	1	1	0	0	0	0
sp|O75165|DJC13_HUMAN	sp|O75165|DJC13_HUMAN	12	12	12	sp|O75165|DJC13_HUMAN DnaJ homolog subfamily C member 13 OS=Homo sapiens OX=9606 GN=DNAJC13 PE=1 SV=5	1	12	12	12	4	6	5	4	4	5	1	0	1	0	1	0	4	2	3	2	3	4	4	6	5	4	4	5	1	0	1	0	1	0	4	2	3	2	3	4	4	6	5	4
sp|O75170|PP6R2_HUMAN	sp|O75170|PP6R2_HUMAN	1	1	1	sp|O75170|PP6R2_HUMAN Serine/threonine-protein phosphatase 6 regulatory subunit 2 OS=Homo sapiens OX=9606 GN=PPP6R2 PE=1 SV=2	1	1	1	1	0	0	0	0	0	0	0	0	0	0	0	0	1	1	1	1	1	1	0	0	0	0	0	0	0	0	0	0	0	0	1	1	1	1	1	1	0	0	0	0
sp|O75175|CNOT3_HUMAN	sp|O75175|CNOT3_HUMAN	2	2	2	sp|O75175|CNOT3_HUMAN CCR4-NOT transcription complex subunit 3 OS=Homo sapiens OX=9606 GN=CNOT3 PE=1 SV=1	1	2	2	2	1	1	2	2	2	2	0	0	0	0	0	0	0	1	1	0	2	1	1	1	2	2	2	2	0	0	0	0	0	0	0	1	1	0	2	1	1	1	2	2
sp|O75190|DNJB6_HUMAN	sp|O75190|DNJB6_HUMAN	1	1	1	sp|O75190|DNJB6_HUMAN DnaJ homolog subfamily B member 6 OS=Homo sapiens OX=9606 GN=DNAJB6 PE=1 SV=2	1	1	1	1	1	0	1	1	1	0	0	0	0	0	0	1	1	1	1	1	1	0	1	0	1	1	1	0	0	0	0	0	0	1	1	1	1	1	1	0	1	0	1	1
sp|O75208|COQ9_HUMAN	sp|O75208|COQ9_HUMAN	1	1	1	sp|O75208|COQ9_HUMAN Ubiquinone biosynthesis protein COQ9, mitochondrial OS=Homo sapiens OX=9606 GN=COQ9 PE=1 SV=1	1	1	1	1	0	0	1	0	0	0	1	1	1	0	0	0	0	0	1	0	0	0	0	0	1	0	0	0	1	1	1	0	0	0	0	0	1	0	0	0	0	0	1	0
sp|O75223|GGCT_HUMAN	sp|O75223|GGCT_HUMAN	7	7	7	sp|O75223|GGCT_HUMAN Gamma-glutamylcyclotransferase OS=Homo sapiens OX=9606 GN=GGCT PE=1 SV=1	1	7	7	7	4	5	5	4	5	4	2	2	1	2	2	2	2	2	2	2	2	2	4	5	5	4	5	4	2	2	1	2	2	2	2	2	2	2	2	2	4	5	5	4
sp|O75251|NDUS7_HUMAN	sp|O75251|NDUS7_HUMAN	2	2	2	sp|O75251|NDUS7_HUMAN NADH dehydrogenase [ubiquinone] iron-sulfur protein 7, mitochondrial OS=Homo sapiens OX=9606 GN=NDUFS7 PE=1 SV=3	1	2	2	2	2	1	1	2	1	2	2	2	2	2	2	2	1	1	1	1	1	1	2	1	1	2	1	2	2	2	2	2	2	2	1	1	1	1	1	1	2	1	1	2
sp|O75306|NDUS2_HUMAN	sp|O75306|NDUS2_HUMAN	8	8	8	sp|O75306|NDUS2_HUMAN NADH dehydrogenase [ubiquinone] iron-sulfur protein 2, mitochondrial OS=Homo sapiens OX=9606 GN=NDUFS2 PE=1 SV=2	1	8	8	8	4	4	4	4	4	3	1	1	1	1	2	2	3	3	3	2	4	2	4	4	4	4	4	3	1	1	1	1	2	2	3	3	3	2	4	2	4	4	4	4
sp|O75312|ZPR1_HUMAN	sp|O75312|ZPR1_HUMAN	2	2	2	sp|O75312|ZPR1_HUMAN Zinc finger protein ZPR1 OS=Homo sapiens OX=9606 GN=ZPR1 PE=1 SV=1	1	2	2	2	1	0	0	1	1	1	0	0	0	0	0	0	1	2	0	0	0	0	1	0	0	1	1	1	0	0	0	0	0	0	1	2	0	0	0	0	1	0	0	1
sp|O75323|NIPS2_HUMAN	sp|O75323|NIPS2_HUMAN	4	4	4	sp|O75323|NIPS2_HUMAN Protein NipSnap homolog 2 OS=Homo sapiens OX=9606 GN=NIPSNAP2 PE=1 SV=1	1	4	4	4	1	2	1	2	1	2	2	0	1	0	2	1	0	1	0	0	0	0	1	2	1	2	1	2	2	0	1	0	2	1	0	1	0	0	0	0	1	2	1	2
sp|O75340|PDCD6_HUMAN	sp|O75340|PDCD6_HUMAN	5	5	5	sp|O75340|PDCD6_HUMAN Programmed cell death protein 6 OS=Homo sapiens OX=9606 GN=PDCD6 PE=1 SV=1	1	5	5	5	1	2	2	1	1	1	3	3	3	2	3	2	4	2	4	2	3	3	1	2	2	1	1	1	3	3	3	2	3	2	4	2	4	2	3	3	1	2	2	1
sp|O75347|TBCA_HUMAN	sp|O75347|TBCA_HUMAN	8	8	8	sp|O75347|TBCA_HUMAN Tubulin-specific chaperone A OS=Homo sapiens OX=9606 GN=TBCA PE=1 SV=3	1	8	8	8	6	4	4	4	2	5	1	3	4	2	3	2	5	5	2	6	3	2	6	4	4	4	2	5	1	3	4	2	3	2	5	5	2	6	3	2	6	4	4	4
sp|O75348|VATG1_HUMAN;sp|O95670|VATG2_HUMAN	sp|O75348|VATG1_HUMAN	3;1	3;1	3;1	sp|O75348|VATG1_HUMAN V-type proton ATPase subunit G 1 OS=Homo sapiens OX=9606 GN=ATP6V1G1 PE=1 SV=3	2	3	3	3	1	1	1	2	1	2	1	1	1	1	1	1	1	1	2	1	2	2	1	1	1	2	1	2	1	1	1	1	1	1	1	1	2	1	2	2	1	1	1	2
sp|O75351|VPS4B_HUMAN;sp|Q6PIW4|FIGL1_HUMAN	sp|O75351|VPS4B_HUMAN	12;1	12;1	10;0	sp|O75351|VPS4B_HUMAN Vacuolar protein sorting-associated protein 4B OS=Homo sapiens OX=9606 GN=VPS4B PE=1 SV=2	2	12	12	10	5	4	3	3	3	3	1	1	2	2	1	4	8	9	9	7	10	7	5	4	3	3	3	3	1	1	2	2	1	4	8	9	9	7	10	7	4	3	2	2
sp|O75352|MPU1_HUMAN	sp|O75352|MPU1_HUMAN	2	2	2	sp|O75352|MPU1_HUMAN Mannose-P-dolichol utilization defect 1 protein OS=Homo sapiens OX=9606 GN=MPDU1 PE=1 SV=2	1	2	2	2	1	1	1	1	1	2	0	0	0	0	1	1	1	1	1	1	1	1	1	1	1	1	1	2	0	0	0	0	1	1	1	1	1	1	1	1	1	1	1	1
sp|O75367|H2AY_HUMAN	sp|O75367|H2AY_HUMAN	12	12	11	sp|O75367|H2AY_HUMAN Core histone macro-H2A.1 OS=Homo sapiens OX=9606 GN=MACROH2A1 PE=1 SV=4	1	12	12	11	11	9	10	10	10	9	6	7	7	6	5	5	6	7	7	6	7	6	11	9	10	10	10	9	6	7	7	6	5	5	6	7	7	6	7	6	10	8	9	9
sp|O75368|SH3L1_HUMAN	sp|O75368|SH3L1_HUMAN	9	9	9	sp|O75368|SH3L1_HUMAN SH3 domain-binding glutamic acid-rich-like protein OS=Homo sapiens OX=9606 GN=SH3BGRL PE=1 SV=1	1	9	9	9	5	4	6	5	4	6	7	7	8	8	7	8	6	4	4	6	6	6	5	4	6	5	4	6	7	7	8	8	7	8	6	4	4	6	6	6	5	4	6	5
sp|O75369|FLNB_HUMAN	sp|O75369|FLNB_HUMAN	112	102	99	sp|O75369|FLNB_HUMAN Filamin-B OS=Homo sapiens OX=9606 GN=FLNB PE=1 SV=2	1	112	102	99	74	74	72	72	72	73	34	33	41	36	39	36	73	76	73	67	74	65	69	70	68	67	68	68	31	30	37	32	35	31	67	68	66	61	68	60	66	67	65	64
sp|O75380|NDUS6_HUMAN	sp|O75380|NDUS6_HUMAN	3	3	3	sp|O75380|NDUS6_HUMAN NADH dehydrogenase [ubiquinone] iron-sulfur protein 6, mitochondrial OS=Homo sapiens OX=9606 GN=NDUFS6 PE=1 SV=1	1	3	3	3	1	0	0	1	1	1	2	2	3	3	3	3	2	2	1	1	2	1	1	0	0	1	1	1	2	2	3	3	3	3	2	2	1	1	2	1	1	0	0	1
sp|O75390|CISY_HUMAN	sp|O75390|CISY_HUMAN	12	12	12	sp|O75390|CISY_HUMAN Citrate synthase, mitochondrial OS=Homo sapiens OX=9606 GN=CS PE=1 SV=2	1	12	12	12	8	9	10	9	10	9	5	5	5	7	5	6	5	6	6	6	6	9	8	9	10	9	10	9	5	5	5	7	5	6	5	6	6	6	6	9	8	9	10	9
sp|O75396|SC22B_HUMAN	sp|O75396|SC22B_HUMAN	6	6	6	sp|O75396|SC22B_HUMAN Vesicle-trafficking protein SEC22b OS=Homo sapiens OX=9606 GN=SEC22B PE=1 SV=4	1	6	6	6	4	3	3	4	4	5	3	3	3	3	3	2	3	4	4	4	3	4	4	3	3	4	4	5	3	3	3	3	3	2	3	4	4	4	3	4	4	3	3	4
sp|O75400|PR40A_HUMAN	sp|O75400|PR40A_HUMAN	4	4	4	sp|O75400|PR40A_HUMAN Pre-mRNA-processing factor 40 homolog A OS=Homo sapiens OX=9606 GN=PRPF40A PE=1 SV=2	1	4	4	4	2	4	3	1	2	2	0	0	0	0	0	0	3	3	2	3	4	3	2	4	3	1	2	2	0	0	0	0	0	0	3	3	2	3	4	3	2	4	3	1
sp|O75410|TACC1_HUMAN	sp|O75410|TACC1_HUMAN	1	1	1	sp|O75410|TACC1_HUMAN Transforming acidic coiled-coil-containing protein 1 OS=Homo sapiens OX=9606 GN=TACC1 PE=1 SV=2	1	1	1	1	0	0	0	0	0	0	1	0	1	0	1	0	0	0	0	0	0	0	0	0	0	0	0	0	1	0	1	0	1	0	0	0	0	0	0	0	0	0	0	0
sp|O75427|LRCH4_HUMAN	sp|O75427|LRCH4_HUMAN	1	1	1	sp|O75427|LRCH4_HUMAN Leucine-rich repeat and calponin homology domain-containing protein 4 OS=Homo sapiens OX=9606 GN=LRCH4 PE=1 SV=2	1	1	1	1	0	0	0	0	1	1	0	0	0	0	0	0	0	0	0	0	0	0	0	0	0	0	1	1	0	0	0	0	0	0	0	0	0	0	0	0	0	0	0	0
sp|O75431|MTX2_HUMAN	sp|O75431|MTX2_HUMAN	3	3	3	sp|O75431|MTX2_HUMAN Metaxin-2 OS=Homo sapiens OX=9606 GN=MTX2 PE=1 SV=1	1	3	3	3	1	0	1	2	1	0	0	0	0	0	0	0	2	1	3	3	3	1	1	0	1	2	1	0	0	0	0	0	0	0	2	1	3	3	3	1	1	0	1	2
sp|O75436|VP26A_HUMAN	sp|O75436|VP26A_HUMAN	12	12	12	sp|O75436|VP26A_HUMAN Vacuolar protein sorting-associated protein 26A OS=Homo sapiens OX=9606 GN=VPS26A PE=1 SV=2	1	12	12	12	6	10	6	8	8	8	3	3	4	3	5	4	6	8	5	7	9	6	6	10	6	8	8	8	3	3	4	3	5	4	6	8	5	7	9	6	6	10	6	8
sp|O75439|MPPB_HUMAN	sp|O75439|MPPB_HUMAN	6	6	6	sp|O75439|MPPB_HUMAN Mitochondrial-processing peptidase subunit beta OS=Homo sapiens OX=9606 GN=PMPCB PE=1 SV=2	1	6	6	6	5	4	5	6	5	5	1	0	0	0	0	0	4	4	2	4	4	4	5	4	5	6	5	5	1	0	0	0	0	0	4	4	2	4	4	4	5	4	5	6
sp|O75475|PSIP1_HUMAN	sp|O75475|PSIP1_HUMAN	3	3	3	sp|O75475|PSIP1_HUMAN PC4 and SFRS1-interacting protein OS=Homo sapiens OX=9606 GN=PSIP1 PE=1 SV=1	1	3	3	3	0	0	0	0	0	0	1	1	1	0	1	1	3	3	3	2	1	1	0	0	0	0	0	0	1	1	1	0	1	1	3	3	3	2	1	1	0	0	0	0
sp|O75477|ERLN1_HUMAN	sp|O75477|ERLN1_HUMAN	9	6	6	sp|O75477|ERLN1_HUMAN Erlin-1 OS=Homo sapiens OX=9606 GN=ERLIN1 PE=1 SV=2	1	9	6	6	8	6	6	8	5	6	1	1	1	1	1	1	5	5	4	4	3	5	6	4	4	6	3	5	1	1	1	0	0	0	3	3	2	2	1	3	6	4	4	6
sp|O75489|NDUS3_HUMAN	sp|O75489|NDUS3_HUMAN	8	8	8	sp|O75489|NDUS3_HUMAN NADH dehydrogenase [ubiquinone] iron-sulfur protein 3, mitochondrial OS=Homo sapiens OX=9606 GN=NDUFS3 PE=1 SV=1	1	8	8	8	7	6	6	6	7	7	5	5	6	4	5	5	4	4	5	5	5	6	7	6	6	6	7	7	5	5	6	4	5	5	4	4	5	5	5	6	7	6	6	6
sp|O75494|SRS10_HUMAN	sp|O75494|SRS10_HUMAN	1	1	1	sp|O75494|SRS10_HUMAN Serine/arginine-rich splicing factor 10 OS=Homo sapiens OX=9606 GN=SRSF10 PE=1 SV=1	1	1	1	1	1	1	1	1	1	1	1	1	1	1	1	1	1	1	1	1	1	1	1	1	1	1	1	1	1	1	1	1	1	1	1	1	1	1	1	1	1	1	1	1
sp|O75506|HSBP1_HUMAN	sp|O75506|HSBP1_HUMAN	2	2	2	sp|O75506|HSBP1_HUMAN Heat shock factor-binding protein 1 OS=Homo sapiens OX=9606 GN=HSBP1 PE=1 SV=1	1	2	2	2	0	0	0	0	0	1	0	0	0	0	0	0	0	1	0	1	1	1	0	0	0	0	0	1	0	0	0	0	0	0	0	1	0	1	1	1	0	0	0	0
sp|O75521|ECI2_HUMAN	sp|O75521|ECI2_HUMAN	4	4	4	sp|O75521|ECI2_HUMAN Enoyl-CoA delta isomerase 2 OS=Homo sapiens OX=9606 GN=ECI2 PE=1 SV=4	1	4	4	4	1	0	0	1	0	0	0	1	1	1	2	1	1	1	2	1	3	1	1	0	0	1	0	0	0	1	1	1	2	1	1	1	2	1	3	1	1	0	0	1
sp|O75531|BAF_HUMAN	sp|O75531|BAF_HUMAN	5	5	5	sp|O75531|BAF_HUMAN Barrier-to-autointegration factor OS=Homo sapiens OX=9606 GN=BANF1 PE=1 SV=1	1	5	5	5	2	2	2	3	2	2	2	4	3	4	3	2	2	3	2	2	2	2	2	2	2	3	2	2	2	4	3	4	3	2	2	3	2	2	2	2	2	2	2	3
sp|O75533|SF3B1_HUMAN	sp|O75533|SF3B1_HUMAN	23	23	23	sp|O75533|SF3B1_HUMAN Splicing factor 3B subunit 1 OS=Homo sapiens OX=9606 GN=SF3B1 PE=1 SV=3	1	23	23	23	5	9	9	7	11	12	1	2	2	2	3	2	7	12	10	10	11	9	5	9	9	7	11	12	1	2	2	2	3	2	7	12	10	10	11	9	5	9	9	7
sp|O75534|CSDE1_HUMAN	sp|O75534|CSDE1_HUMAN	10	10	10	sp|O75534|CSDE1_HUMAN Cold shock domain-containing protein E1 OS=Homo sapiens OX=9606 GN=CSDE1 PE=1 SV=2	1	10	10	10	6	7	8	9	8	7	0	1	1	1	1	1	3	2	3	4	3	4	6	7	8	9	8	7	0	1	1	1	1	1	3	2	3	4	3	4	6	7	8	9
sp|O75569|PRKRA_HUMAN	sp|O75569|PRKRA_HUMAN	4	4	4	sp|O75569|PRKRA_HUMAN Interferon-inducible double-stranded RNA-dependent protein kinase activator A OS=Homo sapiens OX=9606 GN=PRKRA PE=1 SV=1	1	4	4	4	3	2	3	3	3	2	1	0	1	1	0	1	3	2	4	2	3	4	3	2	3	3	3	2	1	0	1	1	0	1	3	2	4	2	3	4	3	2	3	3
sp|O75582|KS6A5_HUMAN;sp|O75676|KS6A4_HUMAN	sp|O75582|KS6A5_HUMAN;sp|O75676|KS6A4_HUMAN	2;1	2;1	2;1	sp|O75582|KS6A5_HUMAN Ribosomal protein S6 kinase alpha-5 OS=Homo sapiens OX=9606 GN=RPS6KA5 PE=1 SV=1;sp|O75676|KS6A4_HUMAN Ribosomal protein S6 kinase alpha-4 OS=Homo sapiens OX=9606 GN=RPS6KA4 PE=1 SV=1	2	2	2	2	0	0	0	1	0	0	0	0	0	0	0	0	0	1	1	1	0	1	0	0	0	1	0	0	0	0	0	0	0	0	0	1	1	1	0	1	0	0	0	1
sp|O75594|PGRP1_HUMAN	sp|O75594|PGRP1_HUMAN	1	1	1	sp|O75594|PGRP1_HUMAN Peptidoglycan recognition protein 1 OS=Homo sapiens OX=9606 GN=PGLYRP1 PE=1 SV=1	1	1	1	1	1	1	1	1	1	1	0	0	0	0	0	0	1	1	1	1	1	1	1	1	1	1	1	1	0	0	0	0	0	0	1	1	1	1	1	1	1	1	1	1
sp|O75607|NPM3_HUMAN	sp|O75607|NPM3_HUMAN	3	3	3	sp|O75607|NPM3_HUMAN Nucleoplasmin-3 OS=Homo sapiens OX=9606 GN=NPM3 PE=1 SV=3	1	3	3	3	1	0	1	1	0	1	1	0	0	0	0	0	2	1	2	1	2	1	1	0	1	1	0	1	1	0	0	0	0	0	2	1	2	1	2	1	1	0	1	1
sp|O75608|LYPA1_HUMAN	sp|O75608|LYPA1_HUMAN	4	4	4	sp|O75608|LYPA1_HUMAN Acyl-protein thioesterase 1 OS=Homo sapiens OX=9606 GN=LYPLA1 PE=1 SV=1	1	4	4	4	3	3	3	2	1	3	2	2	2	2	2	2	3	2	1	2	2	2	3	3	3	2	1	3	2	2	2	2	2	2	3	2	1	2	2	2	3	3	3	2
sp|O75635|SPB7_HUMAN	sp|O75635|SPB7_HUMAN	1	1	1	sp|O75635|SPB7_HUMAN Serpin B7 OS=Homo sapiens OX=9606 GN=SERPINB7 PE=1 SV=1	1	1	1	1	1	1	1	1	1	1	0	0	0	0	0	1	1	1	1	1	1	1	1	1	1	1	1	1	0	0	0	0	0	1	1	1	1	1	1	1	1	1	1	1
sp|O75636|FCN3_HUMAN	sp|O75636|FCN3_HUMAN	2	2	2	sp|O75636|FCN3_HUMAN Ficolin-3 OS=Homo sapiens OX=9606 GN=FCN3 PE=1 SV=2	1	2	2	2	0	1	1	0	0	0	0	0	0	0	0	0	0	0	0	1	1	0	0	1	1	0	0	0	0	0	0	0	0	0	0	0	0	1	1	0	0	1	1	0
sp|O75643|U520_HUMAN	sp|O75643|U520_HUMAN	32	32	32	sp|O75643|U520_HUMAN U5 small nuclear ribonucleoprotein 200 kDa helicase OS=Homo sapiens OX=9606 GN=SNRNP200 PE=1 SV=2	1	32	32	32	21	17	19	20	18	18	7	4	6	3	4	6	18	15	17	16	20	18	21	17	19	20	18	18	7	4	6	3	4	6	18	15	17	16	20	18	21	17	19	20
sp|O75663|TIPRL_HUMAN	sp|O75663|TIPRL_HUMAN	5	5	5	sp|O75663|TIPRL_HUMAN TIP41-like protein OS=Homo sapiens OX=9606 GN=TIPRL PE=1 SV=2	1	5	5	5	1	1	2	2	1	1	1	1	0	1	1	2	3	3	3	3	3	4	1	1	2	2	1	1	1	1	0	1	1	2	3	3	3	3	3	4	1	1	2	2
sp|O75694|NU155_HUMAN	sp|O75694|NU155_HUMAN	15	15	15	sp|O75694|NU155_HUMAN Nuclear pore complex protein Nup155 OS=Homo sapiens OX=9606 GN=NUP155 PE=1 SV=1	1	15	15	15	8	6	7	7	6	9	0	0	0	0	0	0	5	7	8	5	6	6	8	6	7	7	6	9	0	0	0	0	0	0	5	7	8	5	6	6	8	6	7	7
sp|O75695|XRP2_HUMAN	sp|O75695|XRP2_HUMAN	3	3	3	sp|O75695|XRP2_HUMAN Protein XRP2 OS=Homo sapiens OX=9606 GN=RP2 PE=1 SV=4	1	3	3	3	3	0	2	2	2	1	0	0	0	0	0	0	1	2	2	0	1	0	3	0	2	2	2	1	0	0	0	0	0	0	1	2	2	0	1	0	3	0	2	2
sp|O75717|WDHD1_HUMAN	sp|O75717|WDHD1_HUMAN	1	1	1	sp|O75717|WDHD1_HUMAN WD repeat and HMG-box DNA-binding protein 1 OS=Homo sapiens OX=9606 GN=WDHD1 PE=1 SV=1	1	1	1	1	0	0	0	0	0	0	0	0	0	0	0	0	0	1	0	0	1	0	0	0	0	0	0	0	0	0	0	0	0	0	0	1	0	0	1	0	0	0	0	0
sp|O75718|CRTAP_HUMAN	sp|O75718|CRTAP_HUMAN	2	2	2	sp|O75718|CRTAP_HUMAN Cartilage-associated protein OS=Homo sapiens OX=9606 GN=CRTAP PE=1 SV=1	1	2	2	2	1	1	1	1	1	0	0	0	0	0	0	0	1	1	1	1	0	2	1	1	1	1	1	0	0	0	0	0	0	0	1	1	1	1	0	2	1	1	1	1
sp|O75746|CMC1_HUMAN	sp|O75746|CMC1_HUMAN	13	9	9	sp|O75746|CMC1_HUMAN Calcium-binding mitochondrial carrier protein Aralar1 OS=Homo sapiens OX=9606 GN=SLC25A12 PE=1 SV=2	1	13	9	9	3	3	2	4	2	2	4	5	3	2	4	3	5	7	7	5	7	4	2	0	1	3	1	1	1	2	1	0	1	1	4	6	6	4	6	3	2	0	1	3
sp|O75787|RENR_HUMAN	sp|O75787|RENR_HUMAN	2	2	2	sp|O75787|RENR_HUMAN Renin receptor OS=Homo sapiens OX=9606 GN=ATP6AP2 PE=1 SV=2	1	2	2	2	1	1	1	2	1	2	0	0	0	0	0	0	1	1	2	1	1	1	1	1	1	2	1	2	0	0	0	0	0	0	1	1	2	1	1	1	1	1	1	2
sp|O75818|RPP40_HUMAN	sp|O75818|RPP40_HUMAN	1	1	1	sp|O75818|RPP40_HUMAN Ribonuclease P protein subunit p40 OS=Homo sapiens OX=9606 GN=RPP40 PE=1 SV=3	1	1	1	1	0	0	1	1	0	0	0	0	0	0	0	0	1	0	1	1	1	0	0	0	1	1	0	0	0	0	0	0	0	0	1	0	1	1	1	0	0	0	1	1
sp|O75821|EIF3G_HUMAN	sp|O75821|EIF3G_HUMAN	7	7	7	sp|O75821|EIF3G_HUMAN Eukaryotic translation initiation factor 3 subunit G OS=Homo sapiens OX=9606 GN=EIF3G PE=1 SV=2	1	7	7	7	3	1	3	3	3	4	1	1	1	1	1	1	2	3	2	2	2	2	3	1	3	3	3	4	1	1	1	1	1	1	2	3	2	2	2	2	3	1	3	3
sp|O75822|EIF3J_HUMAN	sp|O75822|EIF3J_HUMAN	6	6	6	sp|O75822|EIF3J_HUMAN Eukaryotic translation initiation factor 3 subunit J OS=Homo sapiens OX=9606 GN=EIF3J PE=1 SV=2	1	6	6	6	2	2	2	1	2	3	1	1	1	1	1	2	4	2	3	2	2	4	2	2	2	1	2	3	1	1	1	1	1	2	4	2	3	2	2	4	2	2	2	1
sp|O75828|CBR3_HUMAN	sp|O75828|CBR3_HUMAN	12	10	10	sp|O75828|CBR3_HUMAN Carbonyl reductase [NADPH] 3 OS=Homo sapiens OX=9606 GN=CBR3 PE=1 SV=3	1	12	10	10	2	3	3	3	3	3	4	5	6	6	5	5	8	5	7	6	6	7	0	1	1	1	1	1	2	3	4	4	3	3	6	3	5	4	4	5	0	1	1	1
sp|O75832|PSD10_HUMAN	sp|O75832|PSD10_HUMAN	6	6	6	sp|O75832|PSD10_HUMAN 26S proteasome non-ATPase regulatory subunit 10 OS=Homo sapiens OX=9606 GN=PSMD10 PE=1 SV=1	1	6	6	6	3	2	2	2	2	3	2	1	0	0	2	1	3	2	3	3	4	3	3	2	2	2	2	3	2	1	0	0	2	1	3	2	3	3	4	3	3	2	2	2
sp|O75843|AP1G2_HUMAN	sp|O75843|AP1G2_HUMAN	2	2	2	sp|O75843|AP1G2_HUMAN AP-1 complex subunit gamma-like 2 OS=Homo sapiens OX=9606 GN=AP1G2 PE=1 SV=1	1	2	2	2	0	1	2	1	0	0	0	0	0	0	0	0	0	0	0	0	0	0	0	1	2	1	0	0	0	0	0	0	0	0	0	0	0	0	0	0	0	1	2	1
sp|O75844|FACE1_HUMAN	sp|O75844|FACE1_HUMAN	5	5	5	sp|O75844|FACE1_HUMAN CAAX prenyl protease 1 homolog OS=Homo sapiens OX=9606 GN=ZMPSTE24 PE=1 SV=2	1	5	5	5	3	1	1	1	1	3	0	0	0	0	0	0	0	0	1	0	0	0	3	1	1	1	1	3	0	0	0	0	0	0	0	0	1	0	0	0	3	1	1	1
sp|O75874|IDHC_HUMAN	sp|O75874|IDHC_HUMAN	17	16	16	sp|O75874|IDHC_HUMAN Isocitrate dehydrogenase [NADP] cytoplasmic OS=Homo sapiens OX=9606 GN=IDH1 PE=1 SV=2	1	17	16	16	12	12	13	11	11	11	12	12	9	12	11	10	12	13	12	12	13	13	11	11	12	10	10	10	12	12	9	12	11	10	11	12	11	11	12	12	11	11	12	10
sp|O75881|CP7B1_HUMAN	sp|O75881|CP7B1_HUMAN	1	1	1	sp|O75881|CP7B1_HUMAN Cytochrome P450 7B1 OS=Homo sapiens OX=9606 GN=CYP7B1 PE=1 SV=2	1	1	1	1	0	0	0	0	0	0	0	1	0	1	1	0	1	0	1	0	0	0	0	0	0	0	0	0	0	1	0	1	1	0	1	0	1	0	0	0	0	0	0	0
sp|O75882|ATRN_HUMAN	sp|O75882|ATRN_HUMAN	3	3	3	sp|O75882|ATRN_HUMAN Attractin OS=Homo sapiens OX=9606 GN=ATRN PE=1 SV=2	1	3	3	3	1	1	1	1	1	1	3	2	2	2	2	1	1	1	0	1	1	0	1	1	1	1	1	1	3	2	2	2	2	1	1	1	0	1	1	0	1	1	1	1
sp|O75884|RBBP9_HUMAN	sp|O75884|RBBP9_HUMAN	3	3	3	sp|O75884|RBBP9_HUMAN Serine hydrolase RBBP9 OS=Homo sapiens OX=9606 GN=RBBP9 PE=1 SV=2	1	3	3	3	2	3	2	1	2	2	0	0	0	0	0	1	0	0	0	1	0	0	2	3	2	1	2	2	0	0	0	0	0	1	0	0	0	1	0	0	2	3	2	1
sp|O75907|DGAT1_HUMAN	sp|O75907|DGAT1_HUMAN	1	1	1	sp|O75907|DGAT1_HUMAN Diacylglycerol O-acyltransferase 1 OS=Homo sapiens OX=9606 GN=DGAT1 PE=1 SV=2	1	1	1	1	0	0	0	0	1	0	0	0	0	0	0	0	0	0	0	0	1	0	0	0	0	0	1	0	0	0	0	0	0	0	0	0	0	0	1	0	0	0	0	0
sp|O75909|CCNK_HUMAN	sp|O75909|CCNK_HUMAN	1	1	1	sp|O75909|CCNK_HUMAN Cyclin-K OS=Homo sapiens OX=9606 GN=CCNK PE=1 SV=2	1	1	1	1	0	0	0	1	0	1	0	0	0	0	0	0	1	0	0	1	1	1	0	0	0	1	0	1	0	0	0	0	0	0	1	0	0	1	1	1	0	0	0	1
sp|O75915|PRAF3_HUMAN	sp|O75915|PRAF3_HUMAN	4	4	4	sp|O75915|PRAF3_HUMAN PRA1 family protein 3 OS=Homo sapiens OX=9606 GN=ARL6IP5 PE=1 SV=1	1	4	4	4	4	3	3	3	2	3	2	2	2	2	2	1	3	3	2	3	2	3	4	3	3	3	2	3	2	2	2	2	2	1	3	3	2	3	2	3	4	3	3	3
sp|O75923|DYSF_HUMAN	sp|O75923|DYSF_HUMAN	3	2	2	sp|O75923|DYSF_HUMAN Dysferlin OS=Homo sapiens OX=9606 GN=DYSF PE=1 SV=1	1	3	2	2	1	2	2	2	1	2	0	0	0	0	0	0	1	1	1	1	1	0	0	1	1	1	0	1	0	0	0	0	0	0	0	0	0	0	0	0	0	1	1	1
sp|O75934|SPF27_HUMAN	sp|O75934|SPF27_HUMAN	3	3	3	sp|O75934|SPF27_HUMAN Pre-mRNA-splicing factor SPF27 OS=Homo sapiens OX=9606 GN=BCAS2 PE=1 SV=1	1	3	3	3	0	0	0	0	1	0	0	0	0	0	0	0	2	2	1	0	0	1	0	0	0	0	1	0	0	0	0	0	0	0	2	2	1	0	0	1	0	0	0	0
sp|O75935|DCTN3_HUMAN	sp|O75935|DCTN3_HUMAN	2	2	2	sp|O75935|DCTN3_HUMAN Dynactin subunit 3 OS=Homo sapiens OX=9606 GN=DCTN3 PE=1 SV=1	1	2	2	2	1	0	1	0	0	1	1	1	1	1	1	1	1	1	1	1	1	2	1	0	1	0	0	1	1	1	1	1	1	1	1	1	1	1	1	2	1	0	1	0
sp|O75937|DNJC8_HUMAN	sp|O75937|DNJC8_HUMAN	5	5	5	sp|O75937|DNJC8_HUMAN DnaJ homolog subfamily C member 8 OS=Homo sapiens OX=9606 GN=DNAJC8 PE=1 SV=2	1	5	5	5	0	0	0	0	0	0	1	1	1	1	1	1	1	2	2	1	3	2	0	0	0	0	0	0	1	1	1	1	1	1	1	2	2	1	3	2	0	0	0	0
sp|O75940|SPF30_HUMAN	sp|O75940|SPF30_HUMAN	2	2	2	sp|O75940|SPF30_HUMAN Survival of motor neuron-related-splicing factor 30 OS=Homo sapiens OX=9606 GN=SMNDC1 PE=1 SV=1	1	2	2	2	0	0	0	1	0	0	0	1	0	0	0	0	1	1	1	1	1	1	0	0	0	1	0	0	0	1	0	0	0	0	1	1	1	1	1	1	0	0	0	1
sp|O75947|ATP5H_HUMAN	sp|O75947|ATP5H_HUMAN	10	10	10	sp|O75947|ATP5H_HUMAN ATP synthase subunit d, mitochondrial OS=Homo sapiens OX=9606 GN=ATP5PD PE=1 SV=3	1	10	10	10	5	5	4	6	5	6	4	4	6	4	5	4	3	3	4	3	2	5	5	5	4	6	5	6	4	4	6	4	5	4	3	3	4	3	2	5	5	5	4	6
sp|O75955|FLOT1_HUMAN	sp|O75955|FLOT1_HUMAN	17	17	17	sp|O75955|FLOT1_HUMAN Flotillin-1 OS=Homo sapiens OX=9606 GN=FLOT1 PE=1 SV=3	1	17	17	17	9	9	9	11	9	12	6	7	8	6	4	6	10	11	8	11	12	11	9	9	9	11	9	12	6	7	8	6	4	6	10	11	8	11	12	11	9	9	9	11
sp|O75964|ATP5L_HUMAN	sp|O75964|ATP5L_HUMAN	4	4	4	sp|O75964|ATP5L_HUMAN ATP synthase subunit g, mitochondrial OS=Homo sapiens OX=9606 GN=ATP5MG PE=1 SV=3	1	4	4	4	3	2	3	3	2	2	1	2	1	2	2	2	2	2	2	2	3	2	3	2	3	3	2	2	1	2	1	2	2	2	2	2	2	2	3	2	3	2	3	3
sp|O75976|CBPD_HUMAN	sp|O75976|CBPD_HUMAN	8	8	8	sp|O75976|CBPD_HUMAN Carboxypeptidase D OS=Homo sapiens OX=9606 GN=CPD PE=1 SV=2	1	8	8	8	3	3	2	5	2	2	0	0	0	0	0	0	0	0	0	0	1	0	3	3	2	5	2	2	0	0	0	0	0	0	0	0	0	0	1	0	3	3	2	5
sp|O76003|GLRX3_HUMAN	sp|O76003|GLRX3_HUMAN	9	9	9	sp|O76003|GLRX3_HUMAN Glutaredoxin-3 OS=Homo sapiens OX=9606 GN=GLRX3 PE=1 SV=2	1	9	9	9	3	4	3	2	2	3	1	1	3	3	2	2	7	6	6	9	8	9	3	4	3	2	2	3	1	1	3	3	2	2	7	6	6	9	8	9	3	4	3	2
sp|O76013|KRT36_HUMAN;CON__O76013	sp|O76013|KRT36_HUMAN;CON__O76013	3;3	1;1	1;1	sp|O76013|KRT36_HUMAN Keratin, type I cuticular Ha6 OS=Homo sapiens OX=9606 GN=KRT36 PE=1 SV=1;	2	3	1	1	2	2	3	2	2	1	2	1	2	2	1	1	2	2	2	2	2	2	1	1	1	1	1	1	1	1	1	1	1	1	1	1	1	1	1	1	1	1	1	1
sp|O76021|RL1D1_HUMAN	sp|O76021|RL1D1_HUMAN	1	1	1	sp|O76021|RL1D1_HUMAN Ribosomal L1 domain-containing protein 1 OS=Homo sapiens OX=9606 GN=RSL1D1 PE=1 SV=3	1	1	1	1	0	1	1	0	1	1	0	1	0	0	0	0	1	0	1	0	1	1	0	1	1	0	1	1	0	1	0	0	0	0	1	0	1	0	1	1	0	1	1	0
sp|O76024|WFS1_HUMAN	sp|O76024|WFS1_HUMAN	4	4	4	sp|O76024|WFS1_HUMAN Wolframin OS=Homo sapiens OX=9606 GN=WFS1 PE=1 SV=2	1	4	4	4	1	1	3	1	3	1	0	0	0	0	0	0	0	0	0	0	0	0	1	1	3	1	3	1	0	0	0	0	0	0	0	0	0	0	0	0	1	1	3	1
sp|O76054|S14L2_HUMAN;sp|Q9UDX4|S14L3_HUMAN	sp|O76054|S14L2_HUMAN	5;1	5;1	5;1	sp|O76054|S14L2_HUMAN SEC14-like protein 2 OS=Homo sapiens OX=9606 GN=SEC14L2 PE=1 SV=1	2	5	5	5	3	0	2	0	3	2	0	0	0	0	0	0	0	0	0	0	0	0	3	0	2	0	3	2	0	0	0	0	0	0	0	0	0	0	0	0	3	0	2	0
sp|O76062|ERG24_HUMAN	sp|O76062|ERG24_HUMAN	3	3	3	sp|O76062|ERG24_HUMAN Delta(14)-sterol reductase TM7SF2 OS=Homo sapiens OX=9606 GN=TM7SF2 PE=1 SV=3	1	3	3	3	1	1	1	1	2	2	0	0	0	0	0	0	0	0	0	0	0	0	1	1	1	1	2	2	0	0	0	0	0	0	0	0	0	0	0	0	1	1	1	1
sp|O76070|SYUG_HUMAN	sp|O76070|SYUG_HUMAN	2	2	2	sp|O76070|SYUG_HUMAN Gamma-synuclein OS=Homo sapiens OX=9606 GN=SNCG PE=1 SV=2	1	2	2	2	0	0	0	0	0	0	1	1	0	0	1	1	0	0	0	0	0	0	0	0	0	0	0	0	1	1	0	0	1	1	0	0	0	0	0	0	0	0	0	0
sp|O76071|CIAO1_HUMAN	sp|O76071|CIAO1_HUMAN	1	1	1	sp|O76071|CIAO1_HUMAN Probable cytosolic iron-sulfur protein assembly protein CIAO1 OS=Homo sapiens OX=9606 GN=CIAO1 PE=1 SV=1	1	1	1	1	0	0	0	0	0	0	0	0	0	0	0	0	1	1	0	0	1	0	0	0	0	0	0	0	0	0	0	0	0	0	1	1	0	0	1	0	0	0	0	0
sp|O76076|CCN5_HUMAN	sp|O76076|CCN5_HUMAN	4	4	4	sp|O76076|CCN5_HUMAN CCN family member 5 OS=Homo sapiens OX=9606 GN=CCN5 PE=1 SV=1	1	4	4	4	0	0	0	0	0	0	2	2	2	2	2	4	0	0	0	0	0	0	0	0	0	0	0	0	2	2	2	2	2	4	0	0	0	0	0	0	0	0	0	0
sp|O76094|SRP72_HUMAN	sp|O76094|SRP72_HUMAN	12	12	12	sp|O76094|SRP72_HUMAN Signal recognition particle subunit SRP72 OS=Homo sapiens OX=9606 GN=SRP72 PE=1 SV=3	1	12	12	12	2	3	3	3	3	2	0	0	1	0	0	0	7	7	8	6	7	6	2	3	3	3	3	2	0	0	1	0	0	0	7	7	8	6	7	6	2	3	3	3
sp|O94760|DDAH1_HUMAN	sp|O94760|DDAH1_HUMAN	8	7	7	sp|O94760|DDAH1_HUMAN N(G),N(G)-dimethylarginine dimethylaminohydrolase 1 OS=Homo sapiens OX=9606 GN=DDAH1 PE=1 SV=3	1	8	7	7	3	1	3	0	1	2	3	3	3	4	3	3	0	0	1	0	0	0	3	1	3	0	1	2	2	2	2	3	2	2	0	0	1	0	0	0	3	1	3	0
sp|O94766|B3GA3_HUMAN	sp|O94766|B3GA3_HUMAN	1	1	1	sp|O94766|B3GA3_HUMAN Galactosylgalactosylxylosylprotein 3-beta-glucuronosyltransferase 3 OS=Homo sapiens OX=9606 GN=B3GAT3 PE=1 SV=2	1	1	1	1	1	1	1	1	1	1	0	0	0	0	0	0	0	0	0	0	0	0	1	1	1	1	1	1	0	0	0	0	0	0	0	0	0	0	0	0	1	1	1	1
sp|O94769|ECM2_HUMAN	sp|O94769|ECM2_HUMAN	3	3	3	sp|O94769|ECM2_HUMAN Extracellular matrix protein 2 OS=Homo sapiens OX=9606 GN=ECM2 PE=2 SV=1	1	3	3	3	0	0	0	0	0	0	1	3	2	1	2	2	0	0	0	0	0	0	0	0	0	0	0	0	1	3	2	1	2	2	0	0	0	0	0	0	0	0	0	0
sp|O94776|MTA2_HUMAN	sp|O94776|MTA2_HUMAN	4	4	3	sp|O94776|MTA2_HUMAN Metastasis-associated protein MTA2 OS=Homo sapiens OX=9606 GN=MTA2 PE=1 SV=1	1	4	4	3	1	3	2	1	2	2	1	1	0	1	0	0	2	3	1	2	2	1	1	3	2	1	2	2	1	1	0	1	0	0	2	3	1	2	2	1	1	2	1	1
sp|O94788|AL1A2_HUMAN	sp|O94788|AL1A2_HUMAN	10	8	7	sp|O94788|AL1A2_HUMAN Retinal dehydrogenase 2 OS=Homo sapiens OX=9606 GN=ALDH1A2 PE=1 SV=3	1	10	8	7	1	1	1	1	1	1	5	7	5	4	6	7	1	0	1	1	2	1	0	0	0	0	0	0	4	5	4	3	5	5	1	0	1	1	1	1	0	0	0	0
sp|O94804|STK10_HUMAN	sp|O94804|STK10_HUMAN	1	1	1	sp|O94804|STK10_HUMAN Serine/threonine-protein kinase 10 OS=Homo sapiens OX=9606 GN=STK10 PE=1 SV=1	1	1	1	1	0	1	1	0	0	0	0	0	0	0	0	0	1	1	0	1	0	0	0	1	1	0	0	0	0	0	0	0	0	0	1	1	0	1	0	0	0	1	1	0
sp|O94826|TOM70_HUMAN	sp|O94826|TOM70_HUMAN	8	8	8	sp|O94826|TOM70_HUMAN Mitochondrial import receptor subunit TOM70 OS=Homo sapiens OX=9606 GN=TOMM70 PE=1 SV=1	1	8	8	8	5	6	5	5	6	5	2	1	1	1	2	2	3	3	3	3	4	2	5	6	5	5	6	5	2	1	1	1	2	2	3	3	3	3	4	2	5	6	5	5
sp|O94829|IPO13_HUMAN	sp|O94829|IPO13_HUMAN	2	2	2	sp|O94829|IPO13_HUMAN Importin-13 OS=Homo sapiens OX=9606 GN=IPO13 PE=1 SV=3	1	2	2	2	1	1	1	1	1	1	0	1	1	1	0	1	1	1	1	1	1	1	1	1	1	1	1	1	0	1	1	1	0	1	1	1	1	1	1	1	1	1	1	1
sp|O94832|MYO1D_HUMAN;sp|B0I1T2|MYO1G_HUMAN	sp|O94832|MYO1D_HUMAN	13;1	13;1	13;1	sp|O94832|MYO1D_HUMAN Unconventional myosin-Id OS=Homo sapiens OX=9606 GN=MYO1D PE=1 SV=2	2	13	13	13	4	4	2	2	1	5	1	0	0	0	0	0	6	8	8	6	5	6	4	4	2	2	1	5	1	0	0	0	0	0	6	8	8	6	5	6	4	4	2	2
sp|O94855|SC24D_HUMAN	sp|O94855|SC24D_HUMAN	6	6	6	sp|O94855|SC24D_HUMAN Protein transport protein Sec24D OS=Homo sapiens OX=9606 GN=SEC24D PE=1 SV=2	1	6	6	6	1	0	2	3	1	2	0	0	0	0	1	0	2	1	3	1	2	1	1	0	2	3	1	2	0	0	0	0	1	0	2	1	3	1	2	1	1	0	2	3
sp|O94874|UFL1_HUMAN	sp|O94874|UFL1_HUMAN	10	10	10	sp|O94874|UFL1_HUMAN E3 UFM1-protein ligase 1 OS=Homo sapiens OX=9606 GN=UFL1 PE=1 SV=2	1	10	10	10	7	4	4	5	5	3	0	0	0	0	0	1	6	5	7	6	5	5	7	4	4	5	5	3	0	0	0	0	0	1	6	5	7	6	5	5	7	4	4	5
sp|O94875|SRBS2_HUMAN	sp|O94875|SRBS2_HUMAN	8	7	7	sp|O94875|SRBS2_HUMAN Sorbin and SH3 domain-containing protein 2 OS=Homo sapiens OX=9606 GN=SORBS2 PE=1 SV=3	1	8	7	7	0	0	1	1	2	2	3	5	3	4	4	5	0	0	0	0	0	0	0	0	0	1	1	2	3	5	3	4	4	5	0	0	0	0	0	0	0	0	0	1
sp|O94888|UBXN7_HUMAN	sp|O94888|UBXN7_HUMAN	4	4	4	sp|O94888|UBXN7_HUMAN UBX domain-containing protein 7 OS=Homo sapiens OX=9606 GN=UBXN7 PE=1 SV=2	1	4	4	4	0	0	1	0	0	1	0	1	1	1	0	0	2	3	3	2	3	2	0	0	1	0	0	1	0	1	1	1	0	0	2	3	3	2	3	2	0	0	1	0
sp|O94901|SUN1_HUMAN	sp|O94901|SUN1_HUMAN	4	4	4	sp|O94901|SUN1_HUMAN SUN domain-containing protein 1 OS=Homo sapiens OX=9606 GN=SUN1 PE=1 SV=3	1	4	4	4	0	1	1	1	1	1	0	0	1	0	0	1	0	1	1	0	0	0	0	1	1	1	1	1	0	0	1	0	0	1	0	1	1	0	0	0	0	1	1	1
sp|O94903|PLPHP_HUMAN	sp|O94903|PLPHP_HUMAN	3	3	3	sp|O94903|PLPHP_HUMAN Pyridoxal phosphate homeostasis protein OS=Homo sapiens OX=9606 GN=PLPBP PE=1 SV=1	1	3	3	3	1	0	1	0	1	1	1	2	2	1	0	3	1	2	2	2	2	2	1	0	1	0	1	1	1	2	2	1	0	3	1	2	2	2	2	2	1	0	1	0
sp|O94905|ERLN2_HUMAN	sp|O94905|ERLN2_HUMAN	13	13	10	sp|O94905|ERLN2_HUMAN Erlin-2 OS=Homo sapiens OX=9606 GN=ERLIN2 PE=1 SV=1	1	13	13	10	7	5	6	9	8	9	5	6	4	5	5	4	5	6	5	5	5	5	7	5	6	9	8	9	5	6	4	5	5	4	5	6	5	5	5	5	5	3	4	7
sp|O94906|PRP6_HUMAN	sp|O94906|PRP6_HUMAN	2	2	2	sp|O94906|PRP6_HUMAN Pre-mRNA-processing factor 6 OS=Homo sapiens OX=9606 GN=PRPF6 PE=1 SV=1	1	2	2	2	1	1	0	0	0	0	0	0	0	0	0	0	0	0	1	0	0	1	1	1	0	0	0	0	0	0	0	0	0	0	0	0	1	0	0	1	1	1	0	0
sp|O94915|FRYL_HUMAN	sp|O94915|FRYL_HUMAN	6	6	6	sp|O94915|FRYL_HUMAN Protein furry homolog-like OS=Homo sapiens OX=9606 GN=FRYL PE=1 SV=2	1	6	6	6	1	1	1	1	0	1	1	0	0	0	0	1	2	1	2	2	2	4	1	1	1	1	0	1	1	0	0	0	0	1	2	1	2	2	2	4	1	1	1	1
sp|O94919|ENDD1_HUMAN	sp|O94919|ENDD1_HUMAN	5	5	5	sp|O94919|ENDD1_HUMAN Endonuclease domain-containing 1 protein OS=Homo sapiens OX=9606 GN=ENDOD1 PE=1 SV=2	1	5	5	5	2	1	3	3	4	4	0	0	0	0	0	0	1	1	1	1	1	0	2	1	3	3	4	4	0	0	0	0	0	0	1	1	1	1	1	0	2	1	3	3
sp|O94923|GLCE_HUMAN	sp|O94923|GLCE_HUMAN	1	1	1	sp|O94923|GLCE_HUMAN D-glucuronyl C5-epimerase OS=Homo sapiens OX=9606 GN=GLCE PE=1 SV=3	1	1	1	1	0	1	0	0	0	0	0	0	0	0	0	0	0	0	0	0	0	0	0	1	0	0	0	0	0	0	0	0	0	0	0	0	0	0	0	0	0	1	0	0
sp|O94925|GLSK_HUMAN	sp|O94925|GLSK_HUMAN	5	5	5	sp|O94925|GLSK_HUMAN Glutaminase kidney isoform, mitochondrial OS=Homo sapiens OX=9606 GN=GLS PE=1 SV=1	1	5	5	5	0	0	0	0	0	1	1	1	1	0	1	0	2	2	2	3	2	3	0	0	0	0	0	1	1	1	1	0	1	0	2	2	2	3	2	3	0	0	0	0
sp|O94973|AP2A2_HUMAN	sp|O94973|AP2A2_HUMAN	17	11	11	sp|O94973|AP2A2_HUMAN AP-2 complex subunit alpha-2 OS=Homo sapiens OX=9606 GN=AP2A2 PE=1 SV=2	1	17	11	11	6	6	7	8	8	7	5	6	6	7	6	7	8	7	10	8	8	7	4	4	4	5	6	5	1	3	4	2	2	4	5	3	6	5	5	5	4	4	4	5
sp|O94979|SC31A_HUMAN	sp|O94979|SC31A_HUMAN	14	14	14	sp|O94979|SC31A_HUMAN Protein transport protein Sec31A OS=Homo sapiens OX=9606 GN=SEC31A PE=1 SV=3	1	14	14	14	5	6	8	8	6	7	1	2	2	0	1	1	5	7	7	5	7	8	5	6	8	8	6	7	1	2	2	0	1	1	5	7	7	5	7	8	5	6	8	8
sp|O94985|CSTN1_HUMAN	sp|O94985|CSTN1_HUMAN	1	1	1	sp|O94985|CSTN1_HUMAN Calsyntenin-1 OS=Homo sapiens OX=9606 GN=CLSTN1 PE=1 SV=1	1	1	1	1	0	1	1	1	0	1	0	0	0	0	0	0	0	0	1	0	0	0	0	1	1	1	0	1	0	0	0	0	0	0	0	0	1	0	0	0	0	1	1	1
sp|O94992|HEXI1_HUMAN	sp|O94992|HEXI1_HUMAN	2	2	2	sp|O94992|HEXI1_HUMAN Protein HEXIM1 OS=Homo sapiens OX=9606 GN=HEXIM1 PE=1 SV=1	1	2	2	2	0	0	0	1	2	0	0	0	0	0	0	0	0	0	0	1	0	1	0	0	0	1	2	0	0	0	0	0	0	0	0	0	0	1	0	1	0	0	0	1
sp|O95104|SCAF4_HUMAN;sp|Q9UPN6|SCAF8_HUMAN	sp|O95104|SCAF4_HUMAN;sp|Q9UPN6|SCAF8_HUMAN	2;1	2;1	2;1	sp|O95104|SCAF4_HUMAN SR-related and CTD-associated factor 4 OS=Homo sapiens OX=9606 GN=SCAF4 PE=1 SV=3;sp|Q9UPN6|SCAF8_HUMAN SR-related and CTD-associated factor 8 OS=Homo sapiens OX=9606 GN=SCAF8 PE=1 SV=1	2	2	2	2	1	1	0	1	1	2	0	0	0	0	1	1	1	1	1	1	1	1	1	1	0	1	1	2	0	0	0	0	1	1	1	1	1	1	1	1	1	1	0	1
sp|O95139|NDUB6_HUMAN	sp|O95139|NDUB6_HUMAN	2	2	2	sp|O95139|NDUB6_HUMAN NADH dehydrogenase [ubiquinone] 1 beta subcomplex subunit 6 OS=Homo sapiens OX=9606 GN=NDUFB6 PE=1 SV=3	1	2	2	2	1	2	2	2	2	2	0	0	1	0	1	0	0	1	1	1	1	1	1	2	2	2	2	2	0	0	1	0	1	0	0	1	1	1	1	1	1	2	2	2
sp|O95147|DUS14_HUMAN	sp|O95147|DUS14_HUMAN	1	1	1	sp|O95147|DUS14_HUMAN Dual specificity protein phosphatase 14 OS=Homo sapiens OX=9606 GN=DUSP14 PE=1 SV=1	1	1	1	1	0	0	0	0	0	0	0	0	0	0	0	0	0	0	0	0	0	1	0	0	0	0	0	0	0	0	0	0	0	0	0	0	0	0	0	1	0	0	0	0
sp|O95155|UBE4B_HUMAN	sp|O95155|UBE4B_HUMAN	3	3	3	sp|O95155|UBE4B_HUMAN Ubiquitin conjugation factor E4 B OS=Homo sapiens OX=9606 GN=UBE4B PE=1 SV=1	1	3	3	3	1	0	2	1	0	0	0	0	0	0	0	0	0	0	0	0	0	1	1	0	2	1	0	0	0	0	0	0	0	0	0	0	0	0	0	1	1	0	2	1
sp|O95159|ZFPL1_HUMAN	sp|O95159|ZFPL1_HUMAN	1	1	1	sp|O95159|ZFPL1_HUMAN Zinc finger protein-like 1 OS=Homo sapiens OX=9606 GN=ZFPL1 PE=1 SV=2	1	1	1	1	0	0	0	0	0	0	0	0	0	0	0	0	0	0	1	0	1	0	0	0	0	0	0	0	0	0	0	0	0	0	0	0	1	0	1	0	0	0	0	0
sp|O95163|ELP1_HUMAN	sp|O95163|ELP1_HUMAN	2	2	2	sp|O95163|ELP1_HUMAN Elongator complex protein 1 OS=Homo sapiens OX=9606 GN=ELP1 PE=1 SV=3	1	2	2	2	0	0	0	0	0	0	0	0	0	0	0	0	1	0	0	0	0	1	0	0	0	0	0	0	0	0	0	0	0	0	1	0	0	0	0	1	0	0	0	0
sp|O95168|NDUB4_HUMAN	sp|O95168|NDUB4_HUMAN	2	2	2	sp|O95168|NDUB4_HUMAN NADH dehydrogenase [ubiquinone] 1 beta subcomplex subunit 4 OS=Homo sapiens OX=9606 GN=NDUFB4 PE=1 SV=3	1	2	2	2	1	1	1	1	1	1	1	0	0	0	0	0	2	2	1	1	1	1	1	1	1	1	1	1	1	0	0	0	0	0	2	2	1	1	1	1	1	1	1	1
sp|O95169|NDUB8_HUMAN	sp|O95169|NDUB8_HUMAN	1	1	1	sp|O95169|NDUB8_HUMAN NADH dehydrogenase [ubiquinone] 1 beta subcomplex subunit 8, mitochondrial OS=Homo sapiens OX=9606 GN=NDUFB8 PE=1 SV=1	1	1	1	1	1	0	0	1	0	1	0	0	0	0	0	0	1	1	1	1	1	0	1	0	0	1	0	1	0	0	0	0	0	0	1	1	1	1	1	0	1	0	0	1
sp|O95171|SCEL_HUMAN	sp|O95171|SCEL_HUMAN	10	10	10	sp|O95171|SCEL_HUMAN Sciellin OS=Homo sapiens OX=9606 GN=SCEL PE=1 SV=2	1	10	10	10	1	0	1	1	1	2	7	6	8	6	6	5	0	0	0	0	0	0	1	0	1	1	1	2	7	6	8	6	6	5	0	0	0	0	0	0	1	0	1	1
sp|O95197|RTN3_HUMAN	sp|O95197|RTN3_HUMAN	3	3	3	sp|O95197|RTN3_HUMAN Reticulon-3 OS=Homo sapiens OX=9606 GN=RTN3 PE=1 SV=2	1	3	3	3	2	3	3	3	2	3	1	1	1	1	1	1	1	2	1	2	2	2	2	3	3	3	2	3	1	1	1	1	1	1	1	2	1	2	2	2	2	3	3	3
sp|O95202|LETM1_HUMAN	sp|O95202|LETM1_HUMAN	14	14	14	sp|O95202|LETM1_HUMAN Mitochondrial proton/calcium exchanger protein OS=Homo sapiens OX=9606 GN=LETM1 PE=1 SV=1	1	14	14	14	7	7	7	6	8	11	0	0	0	0	0	0	4	4	3	5	4	4	7	7	7	6	8	11	0	0	0	0	0	0	4	4	3	5	4	4	7	7	7	6
sp|O95232|LC7L3_HUMAN	sp|O95232|LC7L3_HUMAN	5	5	5	sp|O95232|LC7L3_HUMAN Luc7-like protein 3 OS=Homo sapiens OX=9606 GN=LUC7L3 PE=1 SV=2	1	5	5	5	2	2	2	1	2	2	0	0	0	0	0	0	3	2	2	2	2	2	2	2	2	1	2	2	0	0	0	0	0	0	3	2	2	2	2	2	2	2	2	1
sp|O95274|LYPD3_HUMAN	sp|O95274|LYPD3_HUMAN	5	5	5	sp|O95274|LYPD3_HUMAN Ly6/PLAUR domain-containing protein 3 OS=Homo sapiens OX=9606 GN=LYPD3 PE=1 SV=2	1	5	5	5	2	2	2	1	2	2	1	2	1	1	1	1	5	5	4	3	5	4	2	2	2	1	2	2	1	2	1	1	1	1	5	5	4	3	5	4	2	2	2	1
sp|O95292|VAPB_HUMAN	sp|O95292|VAPB_HUMAN	3	3	3	sp|O95292|VAPB_HUMAN Vesicle-associated membrane protein-associated protein B/C OS=Homo sapiens OX=9606 GN=VAPB PE=1 SV=3	1	3	3	3	1	0	0	0	0	0	0	0	0	0	0	0	2	1	1	1	1	1	1	0	0	0	0	0	0	0	0	0	0	0	2	1	1	1	1	1	1	0	0	0
sp|O95295|SNAPN_HUMAN	sp|O95295|SNAPN_HUMAN	1	1	1	sp|O95295|SNAPN_HUMAN SNARE-associated protein Snapin OS=Homo sapiens OX=9606 GN=SNAPIN PE=1 SV=1	1	1	1	1	0	0	0	0	1	0	0	0	0	0	0	0	0	0	0	0	0	0	0	0	0	0	1	0	0	0	0	0	0	0	0	0	0	0	0	0	0	0	0	0
sp|O95297|MPZL1_HUMAN	sp|O95297|MPZL1_HUMAN	2	2	2	sp|O95297|MPZL1_HUMAN Myelin protein zero-like protein 1 OS=Homo sapiens OX=9606 GN=MPZL1 PE=1 SV=1	1	2	2	2	0	0	0	1	0	1	0	0	0	0	0	0	1	1	1	1	0	1	0	0	0	1	0	1	0	0	0	0	0	0	1	1	1	1	0	1	0	0	0	1
sp|O95299|NDUAA_HUMAN	sp|O95299|NDUAA_HUMAN	3	3	3	sp|O95299|NDUAA_HUMAN NADH dehydrogenase [ubiquinone] 1 alpha subcomplex subunit 10, mitochondrial OS=Homo sapiens OX=9606 GN=NDUFA10 PE=1 SV=1	1	3	3	3	3	1	1	2	2	1	1	1	1	1	1	1	1	1	1	0	1	0	3	1	1	2	2	1	1	1	1	1	1	1	1	1	1	0	1	0	3	1	1	2
sp|O95302|FKBP9_HUMAN;sp|Q75LS8|FKB9L_HUMAN	sp|O95302|FKBP9_HUMAN	9;1	9;1	9;1	sp|O95302|FKBP9_HUMAN Peptidyl-prolyl cis-trans isomerase FKBP9 OS=Homo sapiens OX=9606 GN=FKBP9 PE=1 SV=2	2	9	9	9	7	5	5	7	6	4	0	0	0	0	0	0	5	5	4	6	5	5	7	5	5	7	6	4	0	0	0	0	0	0	5	5	4	6	5	5	7	5	5	7
sp|O95319|CELF2_HUMAN	sp|O95319|CELF2_HUMAN	1	1	1	sp|O95319|CELF2_HUMAN CUGBP Elav-like family member 2 OS=Homo sapiens OX=9606 GN=CELF2 PE=1 SV=1	1	1	1	1	0	0	1	1	0	0	0	0	0	1	0	0	1	1	0	1	0	0	0	0	1	1	0	0	0	0	0	1	0	0	1	1	0	1	0	0	0	0	1	1
sp|O95336|6PGL_HUMAN	sp|O95336|6PGL_HUMAN	9	9	9	sp|O95336|6PGL_HUMAN 6-phosphogluconolactonase OS=Homo sapiens OX=9606 GN=PGLS PE=1 SV=2	1	9	9	9	6	6	6	7	6	7	6	5	6	8	4	5	6	5	4	6	6	6	6	6	6	7	6	7	6	5	6	8	4	5	6	5	4	6	6	6	6	6	6	7
sp|O95340|PAPS2_HUMAN	sp|O95340|PAPS2_HUMAN	3	3	3	sp|O95340|PAPS2_HUMAN Bifunctional 3-phosphoadenosine 5-phosphosulfate synthase 2 OS=Homo sapiens OX=9606 GN=PAPSS2 PE=1 SV=2	1	3	3	3	0	0	0	0	0	0	0	0	0	0	0	0	1	3	1	1	0	1	0	0	0	0	0	0	0	0	0	0	0	0	1	3	1	1	0	1	0	0	0	0
sp|O95347|SMC2_HUMAN	sp|O95347|SMC2_HUMAN	4	4	4	sp|O95347|SMC2_HUMAN Structural maintenance of chromosomes protein 2 OS=Homo sapiens OX=9606 GN=SMC2 PE=1 SV=2	1	4	4	4	0	0	0	0	0	0	0	0	0	0	0	0	2	1	2	3	2	1	0	0	0	0	0	0	0	0	0	0	0	0	2	1	2	3	2	1	0	0	0	0
sp|O95352|ATG7_HUMAN	sp|O95352|ATG7_HUMAN	2	2	2	sp|O95352|ATG7_HUMAN Ubiquitin-like modifier-activating enzyme ATG7 OS=Homo sapiens OX=9606 GN=ATG7 PE=1 SV=1	1	2	2	2	0	0	0	0	0	0	0	0	0	0	0	0	1	0	1	1	1	1	0	0	0	0	0	0	0	0	0	0	0	0	1	0	1	1	1	1	0	0	0	0
sp|O95359|TACC2_HUMAN	sp|O95359|TACC2_HUMAN	2	2	2	sp|O95359|TACC2_HUMAN Transforming acidic coiled-coil-containing protein 2 OS=Homo sapiens OX=9606 GN=TACC2 PE=1 SV=3	1	2	2	2	0	0	0	0	0	0	0	1	1	0	1	0	0	1	0	0	0	0	0	0	0	0	0	0	0	1	1	0	1	0	0	1	0	0	0	0	0	0	0	0
sp|O95361|TRI16_HUMAN;sp|Q309B1|TR16L_HUMAN	sp|O95361|TRI16_HUMAN	6;2	6;2	6;2	sp|O95361|TRI16_HUMAN Tripartite motif-containing protein 16 OS=Homo sapiens OX=9606 GN=TRIM16 PE=1 SV=3	2	6	6	6	2	1	2	0	2	1	1	1	2	1	1	1	3	3	4	3	2	3	2	1	2	0	2	1	1	1	2	1	1	1	3	3	4	3	2	3	2	1	2	0
sp|O95365|ZBT7A_HUMAN	sp|O95365|ZBT7A_HUMAN	1	1	1	sp|O95365|ZBT7A_HUMAN Zinc finger and BTB domain-containing protein 7A OS=Homo sapiens OX=9606 GN=ZBTB7A PE=1 SV=1	1	1	1	1	0	0	0	0	0	0	0	0	0	0	0	0	1	0	1	1	1	0	0	0	0	0	0	0	0	0	0	0	0	0	1	0	1	1	1	0	0	0	0	0
sp|O95372|LYPA2_HUMAN	sp|O95372|LYPA2_HUMAN	2	2	2	sp|O95372|LYPA2_HUMAN Acyl-protein thioesterase 2 OS=Homo sapiens OX=9606 GN=LYPLA2 PE=1 SV=1	1	2	2	2	1	2	1	2	1	2	0	0	0	0	0	0	2	2	1	2	2	2	1	2	1	2	1	2	0	0	0	0	0	0	2	2	1	2	2	2	1	2	1	2
sp|O95373|IPO7_HUMAN	sp|O95373|IPO7_HUMAN	17	17	17	sp|O95373|IPO7_HUMAN Importin-7 OS=Homo sapiens OX=9606 GN=IPO7 PE=1 SV=1	1	17	17	17	8	6	6	6	6	6	2	2	2	1	1	3	10	10	10	9	11	10	8	6	6	6	6	6	2	2	2	1	1	3	10	10	10	9	11	10	8	6	6	6
sp|O95376|ARI2_HUMAN	sp|O95376|ARI2_HUMAN	2	2	2	sp|O95376|ARI2_HUMAN E3 ubiquitin-protein ligase ARIH2 OS=Homo sapiens OX=9606 GN=ARIH2 PE=1 SV=1	1	2	2	2	1	0	1	1	1	0	0	0	0	0	0	0	1	0	1	1	2	0	1	0	1	1	1	0	0	0	0	0	0	0	1	0	1	1	2	0	1	0	1	1
sp|O95379|TFIP8_HUMAN	sp|O95379|TFIP8_HUMAN	1	1	1	sp|O95379|TFIP8_HUMAN Tumor necrosis factor alpha-induced protein 8 OS=Homo sapiens OX=9606 GN=TNFAIP8 PE=1 SV=1	1	1	1	1	0	1	0	1	0	0	0	0	0	0	0	0	1	1	1	1	1	1	0	1	0	1	0	0	0	0	0	0	0	0	1	1	1	1	1	1	0	1	0	1
sp|O95394|AGM1_HUMAN	sp|O95394|AGM1_HUMAN	3	3	3	sp|O95394|AGM1_HUMAN Phosphoacetylglucosamine mutase OS=Homo sapiens OX=9606 GN=PGM3 PE=1 SV=1	1	3	3	3	0	0	0	0	0	0	0	0	0	0	0	0	1	1	1	0	2	2	0	0	0	0	0	0	0	0	0	0	0	0	1	1	1	0	2	2	0	0	0	0
sp|O95406|CNIH1_HUMAN	sp|O95406|CNIH1_HUMAN	2	2	2	sp|O95406|CNIH1_HUMAN Protein cornichon homolog 1 OS=Homo sapiens OX=9606 GN=CNIH1 PE=1 SV=1	1	2	2	2	2	1	2	2	2	2	0	1	1	1	1	1	1	1	1	1	2	2	2	1	2	2	2	2	0	1	1	1	1	1	1	1	1	1	2	2	2	1	2	2
sp|O95425|SVIL_HUMAN	sp|O95425|SVIL_HUMAN	4	4	4	sp|O95425|SVIL_HUMAN Supervillin OS=Homo sapiens OX=9606 GN=SVIL PE=1 SV=2	1	4	4	4	0	0	0	0	1	0	0	0	0	0	0	0	2	1	1	2	2	1	0	0	0	0	1	0	0	0	0	0	0	0	2	1	1	2	2	1	0	0	0	0
sp|O95427|PIGN_HUMAN	sp|O95427|PIGN_HUMAN	1	1	1	sp|O95427|PIGN_HUMAN GPI ethanolamine phosphate transferase 1 OS=Homo sapiens OX=9606 GN=PIGN PE=2 SV=1	1	1	1	1	1	0	1	0	0	0	0	0	0	0	0	0	1	1	0	0	0	0	1	0	1	0	0	0	0	0	0	0	0	0	1	1	0	0	0	0	1	0	1	0
sp|O95433|AHSA1_HUMAN	sp|O95433|AHSA1_HUMAN	5	5	5	sp|O95433|AHSA1_HUMAN Activator of 90 kDa heat shock protein ATPase homolog 1 OS=Homo sapiens OX=9606 GN=AHSA1 PE=1 SV=1	1	5	5	5	2	3	3	3	1	1	1	1	2	0	0	0	3	3	3	3	2	5	2	3	3	3	1	1	1	1	2	0	0	0	3	3	3	3	2	5	2	3	3	3
sp|O95436|NPT2B_HUMAN	sp|O95436|NPT2B_HUMAN	3	3	3	sp|O95436|NPT2B_HUMAN Sodium-dependent phosphate transport protein 2B OS=Homo sapiens OX=9606 GN=SLC34A2 PE=1 SV=3	1	3	3	3	3	3	1	2	3	2	0	0	0	0	0	0	0	0	0	0	0	0	3	3	1	2	3	2	0	0	0	0	0	0	0	0	0	0	0	0	3	3	1	2
sp|O95445|APOM_HUMAN	sp|O95445|APOM_HUMAN	2	2	2	sp|O95445|APOM_HUMAN Apolipoprotein M OS=Homo sapiens OX=9606 GN=APOM PE=1 SV=2	1	2	2	2	1	0	0	0	0	0	2	1	1	1	1	1	0	0	0	0	0	0	1	0	0	0	0	0	2	1	1	1	1	1	0	0	0	0	0	0	1	0	0	0
sp|O95452|CXB6_HUMAN	sp|O95452|CXB6_HUMAN	1	1	1	sp|O95452|CXB6_HUMAN Gap junction beta-6 protein OS=Homo sapiens OX=9606 GN=GJB6 PE=1 SV=2	1	1	1	1	0	0	0	0	0	0	0	0	0	0	0	0	0	0	1	0	0	0	0	0	0	0	0	0	0	0	0	0	0	0	0	0	1	0	0	0	0	0	0	0
sp|O95453|PARN_HUMAN	sp|O95453|PARN_HUMAN	1	1	1	sp|O95453|PARN_HUMAN Poly(A)-specific ribonuclease PARN OS=Homo sapiens OX=9606 GN=PARN PE=1 SV=1	1	1	1	1	1	0	0	0	0	0	0	0	0	0	0	0	0	0	0	0	0	0	1	0	0	0	0	0	0	0	0	0	0	0	0	0	0	0	0	0	1	0	0	0
sp|O95456|PSMG1_HUMAN	sp|O95456|PSMG1_HUMAN	3	3	3	sp|O95456|PSMG1_HUMAN Proteasome assembly chaperone 1 OS=Homo sapiens OX=9606 GN=PSMG1 PE=1 SV=1	1	3	3	3	1	2	2	0	1	1	1	0	1	1	1	1	0	2	0	2	1	3	1	2	2	0	1	1	1	0	1	1	1	1	0	2	0	2	1	3	1	2	2	0
sp|O95470|SGPL1_HUMAN	sp|O95470|SGPL1_HUMAN	10	10	10	sp|O95470|SGPL1_HUMAN Sphingosine-1-phosphate lyase 1 OS=Homo sapiens OX=9606 GN=SGPL1 PE=1 SV=3	1	10	10	10	7	6	9	8	7	9	0	0	0	0	0	0	1	2	2	1	1	1	7	6	9	8	7	9	0	0	0	0	0	0	1	2	2	1	1	1	7	6	9	8
sp|O95471|CLD7_HUMAN	sp|O95471|CLD7_HUMAN	1	1	1	sp|O95471|CLD7_HUMAN Claudin-7 OS=Homo sapiens OX=9606 GN=CLDN7 PE=1 SV=4	1	1	1	1	1	1	1	1	1	1	0	0	0	0	0	0	1	1	1	1	1	1	1	1	1	1	1	1	0	0	0	0	0	0	1	1	1	1	1	1	1	1	1	1
sp|O95479|G6PE_HUMAN	sp|O95479|G6PE_HUMAN	10	10	10	sp|O95479|G6PE_HUMAN GDH/6PGL endoplasmic bifunctional protein OS=Homo sapiens OX=9606 GN=H6PD PE=1 SV=2	1	10	10	10	4	6	3	4	4	7	2	3	1	1	3	2	2	1	2	1	3	2	4	6	3	4	4	7	2	3	1	1	3	2	2	1	2	1	3	2	4	6	3	4
sp|O95486|SC24A_HUMAN	sp|O95486|SC24A_HUMAN	2	2	2	sp|O95486|SC24A_HUMAN Protein transport protein Sec24A OS=Homo sapiens OX=9606 GN=SEC24A PE=1 SV=2	1	2	2	2	1	1	1	1	1	1	1	1	1	1	0	1	1	1	1	2	1	1	1	1	1	1	1	1	1	1	1	1	0	1	1	1	1	2	1	1	1	1	1	1
sp|O95487|SC24B_HUMAN	sp|O95487|SC24B_HUMAN	2	2	2	sp|O95487|SC24B_HUMAN Protein transport protein Sec24B OS=Homo sapiens OX=9606 GN=SEC24B PE=1 SV=2	1	2	2	2	2	0	0	0	1	0	0	0	0	0	0	0	0	0	0	0	0	0	2	0	0	0	1	0	0	0	0	0	0	0	0	0	0	0	0	0	2	0	0	0
sp|O95571|ETHE1_HUMAN	sp|O95571|ETHE1_HUMAN	8	8	8	sp|O95571|ETHE1_HUMAN Persulfide dioxygenase ETHE1, mitochondrial OS=Homo sapiens OX=9606 GN=ETHE1 PE=1 SV=2	1	8	8	8	5	4	4	3	4	7	0	0	0	2	0	2	4	5	5	4	3	3	5	4	4	3	4	7	0	0	0	2	0	2	4	5	5	4	3	3	5	4	4	3
sp|O95573|ACSL3_HUMAN	sp|O95573|ACSL3_HUMAN	9	7	7	sp|O95573|ACSL3_HUMAN Long-chain-fatty-acid--CoA ligase 3 OS=Homo sapiens OX=9606 GN=ACSL3 PE=1 SV=3	1	9	7	7	3	4	3	4	5	3	0	0	0	0	0	0	3	3	2	3	2	1	2	3	2	3	4	2	0	0	0	0	0	0	2	2	2	3	2	1	2	3	2	3
sp|O95630|STABP_HUMAN	sp|O95630|STABP_HUMAN	2	2	2	sp|O95630|STABP_HUMAN STAM-binding protein OS=Homo sapiens OX=9606 GN=STAMBP PE=1 SV=1	1	2	2	2	0	0	0	0	0	0	0	0	0	0	1	0	2	1	1	2	1	1	0	0	0	0	0	0	0	0	0	0	1	0	2	1	1	2	1	1	0	0	0	0
sp|O95639|CPSF4_HUMAN	sp|O95639|CPSF4_HUMAN	1	1	1	sp|O95639|CPSF4_HUMAN Cleavage and polyadenylation specificity factor subunit 4 OS=Homo sapiens OX=9606 GN=CPSF4 PE=1 SV=1	1	1	1	1	0	1	0	0	1	0	0	1	0	0	0	0	0	0	1	1	0	0	0	1	0	0	1	0	0	1	0	0	0	0	0	0	1	1	0	0	0	1	0	0
sp|O95671|ASML_HUMAN	sp|O95671|ASML_HUMAN	1	1	1	sp|O95671|ASML_HUMAN Probable bifunctional dTTP/UTP pyrophosphatase/methyltransferase protein OS=Homo sapiens OX=9606 GN=ASMTL PE=1 SV=3	1	1	1	1	0	0	0	0	0	0	0	0	0	0	0	0	1	1	1	1	1	0	0	0	0	0	0	0	0	0	0	0	0	0	1	1	1	1	1	0	0	0	0	0
sp|O95674|CDS2_HUMAN	sp|O95674|CDS2_HUMAN	2	2	2	sp|O95674|CDS2_HUMAN Phosphatidate cytidylyltransferase 2 OS=Homo sapiens OX=9606 GN=CDS2 PE=1 SV=1	1	2	2	2	1	1	1	0	1	1	0	0	0	0	0	0	0	1	0	0	1	0	1	1	1	0	1	1	0	0	0	0	0	0	0	1	0	0	1	0	1	1	1	0
sp|O95716|RAB3D_HUMAN	sp|O95716|RAB3D_HUMAN	5	5	3	sp|O95716|RAB3D_HUMAN Ras-related protein Rab-3D OS=Homo sapiens OX=9606 GN=RAB3D PE=1 SV=1	1	5	5	3	3	1	3	3	2	3	1	2	0	0	1	2	4	4	4	2	4	2	3	1	3	3	2	3	1	2	0	0	1	2	4	4	4	2	4	2	2	1	3	3
sp|O95747|OXSR1_HUMAN	sp|O95747|OXSR1_HUMAN	7	7	6	sp|O95747|OXSR1_HUMAN Serine/threonine-protein kinase OSR1 OS=Homo sapiens OX=9606 GN=OXSR1 PE=1 SV=1	1	7	7	6	5	3	3	3	4	3	3	3	1	1	2	2	4	4	3	3	4	4	5	3	3	3	4	3	3	3	1	1	2	2	4	4	3	3	4	4	4	2	3	2
sp|O95757|HS74L_HUMAN	sp|O95757|HS74L_HUMAN	12	9	9	sp|O95757|HS74L_HUMAN Heat shock 70 kDa protein 4L OS=Homo sapiens OX=9606 GN=HSPA4L PE=1 SV=3	1	12	9	9	4	2	4	3	2	2	3	5	2	2	3	3	8	8	5	7	4	8	1	0	1	1	0	0	0	3	1	0	0	1	5	6	4	5	3	5	1	0	1	1
sp|O95758|PTBP3_HUMAN	sp|O95758|PTBP3_HUMAN	10	8	8	sp|O95758|PTBP3_HUMAN Polypyrimidine tract-binding protein 3 OS=Homo sapiens OX=9606 GN=PTBP3 PE=1 SV=2	1	10	8	8	4	3	3	4	7	4	1	1	3	1	2	1	5	7	8	8	8	8	3	2	2	2	5	3	0	0	1	0	1	0	4	5	6	6	6	6	3	2	2	2
sp|O95777|LSM8_HUMAN	sp|O95777|LSM8_HUMAN	4	4	4	sp|O95777|LSM8_HUMAN U6 snRNA-associated Sm-like protein LSm8 OS=Homo sapiens OX=9606 GN=LSM8 PE=1 SV=3	1	4	4	4	0	2	1	0	2	2	1	0	1	1	2	1	0	0	1	1	0	0	0	2	1	0	2	2	1	0	1	1	2	1	0	0	1	1	0	0	0	2	1	0
sp|O95782|AP2A1_HUMAN	sp|O95782|AP2A1_HUMAN	23	23	17	sp|O95782|AP2A1_HUMAN AP-2 complex subunit alpha-1 OS=Homo sapiens OX=9606 GN=AP2A1 PE=1 SV=3	1	23	23	17	8	8	9	11	7	9	8	8	7	9	8	7	15	16	16	13	15	16	8	8	9	11	7	9	8	8	7	9	8	7	15	16	16	13	15	16	6	6	6	8
sp|O95786|DDX58_HUMAN	sp|O95786|DDX58_HUMAN	9	9	9	sp|O95786|DDX58_HUMAN Antiviral innate immune response receptor RIG-I OS=Homo sapiens OX=9606 GN=DDX58 PE=1 SV=2	1	9	9	9	1	2	1	1	1	2	0	0	0	0	0	0	5	4	6	5	3	6	1	2	1	1	1	2	0	0	0	0	0	0	5	4	6	5	3	6	1	2	1	1
sp|O95793|STAU1_HUMAN;sp|Q9NUL3|STAU2_HUMAN	sp|O95793|STAU1_HUMAN	5;1	5;1	5;1	sp|O95793|STAU1_HUMAN Double-stranded RNA-binding protein Staufen homolog 1 OS=Homo sapiens OX=9606 GN=STAU1 PE=1 SV=2	2	5	5	5	1	0	1	1	1	1	0	0	0	0	0	0	3	3	3	1	3	4	1	0	1	1	1	1	0	0	0	0	0	0	3	3	3	1	3	4	1	0	1	1
sp|O95807|TM50A_HUMAN	sp|O95807|TM50A_HUMAN	1	1	1	sp|O95807|TM50A_HUMAN Transmembrane protein 50A OS=Homo sapiens OX=9606 GN=TMEM50A PE=1 SV=1	1	1	1	1	1	1	1	1	1	1	0	0	0	0	0	0	1	1	1	1	1	1	1	1	1	1	1	1	0	0	0	0	0	0	1	1	1	1	1	1	1	1	1	1
sp|O95810|CAVN2_HUMAN	sp|O95810|CAVN2_HUMAN	3	3	3	sp|O95810|CAVN2_HUMAN Caveolae-associated protein 2 OS=Homo sapiens OX=9606 GN=CAVIN2 PE=1 SV=3	1	3	3	3	1	1	1	1	1	1	2	2	2	2	2	2	0	0	0	0	1	1	1	1	1	1	1	1	2	2	2	2	2	2	0	0	0	0	1	1	1	1	1	1
sp|O95816|BAG2_HUMAN	sp|O95816|BAG2_HUMAN	7	7	7	sp|O95816|BAG2_HUMAN BAG family molecular chaperone regulator 2 OS=Homo sapiens OX=9606 GN=BAG2 PE=1 SV=1	1	7	7	7	2	2	2	3	3	3	2	1	1	2	2	2	2	2	2	2	2	1	2	2	2	3	3	3	2	1	1	2	2	2	2	2	2	2	2	1	2	2	2	3
sp|O95817|BAG3_HUMAN	sp|O95817|BAG3_HUMAN	8	8	8	sp|O95817|BAG3_HUMAN BAG family molecular chaperone regulator 3 OS=Homo sapiens OX=9606 GN=BAG3 PE=1 SV=3	1	8	8	8	1	2	1	2	0	1	3	4	3	2	1	3	5	6	4	4	6	4	1	2	1	2	0	1	3	4	3	2	1	3	5	6	4	4	6	4	1	2	1	2
sp|O95831|AIFM1_HUMAN	sp|O95831|AIFM1_HUMAN	16	16	16	sp|O95831|AIFM1_HUMAN Apoptosis-inducing factor 1, mitochondrial OS=Homo sapiens OX=9606 GN=AIFM1 PE=1 SV=1	1	16	16	16	10	12	12	11	12	9	5	4	4	5	4	6	7	7	8	7	8	8	10	12	12	11	12	9	5	4	4	5	4	6	7	7	8	7	8	8	10	12	12	11
sp|O95832|CLD1_HUMAN	sp|O95832|CLD1_HUMAN	2	2	2	sp|O95832|CLD1_HUMAN Claudin-1 OS=Homo sapiens OX=9606 GN=CLDN1 PE=1 SV=1	1	2	2	2	0	1	0	0	0	0	0	0	0	0	0	0	2	2	2	2	2	2	0	1	0	0	0	0	0	0	0	0	0	0	2	2	2	2	2	2	0	1	0	0
sp|O95833|CLIC3_HUMAN	sp|O95833|CLIC3_HUMAN	7	7	7	sp|O95833|CLIC3_HUMAN Chloride intracellular channel protein 3 OS=Homo sapiens OX=9606 GN=CLIC3 PE=1 SV=2	1	7	7	7	4	3	3	4	3	3	5	6	6	4	4	4	1	1	0	0	0	0	4	3	3	4	3	3	5	6	6	4	4	4	1	1	0	0	0	0	4	3	3	4
sp|O95834|EMAL2_HUMAN	sp|O95834|EMAL2_HUMAN	11	11	11	sp|O95834|EMAL2_HUMAN Echinoderm microtubule-associated protein-like 2 OS=Homo sapiens OX=9606 GN=EML2 PE=1 SV=1	1	11	11	11	1	0	3	1	1	1	3	4	4	2	1	2	5	6	8	7	7	4	1	0	3	1	1	1	3	4	4	2	1	2	5	6	8	7	7	4	1	0	3	1
sp|O95858|TSN15_HUMAN	sp|O95858|TSN15_HUMAN	1	1	1	sp|O95858|TSN15_HUMAN Tetraspanin-15 OS=Homo sapiens OX=9606 GN=TSPAN15 PE=1 SV=1	1	1	1	1	1	1	1	1	1	1	0	0	0	0	0	0	0	0	0	0	0	0	1	1	1	1	1	1	0	0	0	0	0	0	0	0	0	0	0	0	1	1	1	1
sp|O95861|BPNT1_HUMAN	sp|O95861|BPNT1_HUMAN	7	7	7	sp|O95861|BPNT1_HUMAN 3(2),5-bisphosphate nucleotidase 1 OS=Homo sapiens OX=9606 GN=BPNT1 PE=1 SV=1	1	7	7	7	2	4	2	3	2	3	1	1	0	1	1	2	3	2	3	3	6	3	2	4	2	3	2	3	1	1	0	1	1	2	3	2	3	3	6	3	2	4	2	3
sp|O95865|DDAH2_HUMAN	sp|O95865|DDAH2_HUMAN	12	12	11	sp|O95865|DDAH2_HUMAN N(G),N(G)-dimethylarginine dimethylaminohydrolase 2 OS=Homo sapiens OX=9606 GN=DDAH2 PE=1 SV=1	1	12	12	11	5	3	4	3	4	5	8	10	7	6	9	9	1	0	1	0	1	1	5	3	4	3	4	5	8	10	7	6	9	9	1	0	1	0	1	1	5	3	4	3
sp|O95867|LY66C_HUMAN	sp|O95867|LY66C_HUMAN	2	2	2	sp|O95867|LY66C_HUMAN Lymphocyte antigen 6 complex locus protein G6c OS=Homo sapiens OX=9606 GN=LY6G6C PE=1 SV=1	1	2	2	2	2	1	2	2	2	2	0	0	0	0	0	0	0	0	0	0	0	0	2	1	2	2	2	2	0	0	0	0	0	0	0	0	0	0	0	0	2	1	2	2
sp|O95870|ABHGA_HUMAN	sp|O95870|ABHGA_HUMAN	1	1	1	sp|O95870|ABHGA_HUMAN Phosphatidylserine lipase ABHD16A OS=Homo sapiens OX=9606 GN=ABHD16A PE=1 SV=3	1	1	1	1	1	1	1	1	1	1	0	0	0	0	0	0	0	0	0	0	0	0	1	1	1	1	1	1	0	0	0	0	0	0	0	0	0	0	0	0	1	1	1	1
sp|O95881|TXD12_HUMAN	sp|O95881|TXD12_HUMAN	4	4	4	sp|O95881|TXD12_HUMAN Thioredoxin domain-containing protein 12 OS=Homo sapiens OX=9606 GN=TXNDC12 PE=1 SV=1	1	4	4	4	3	4	3	3	3	3	1	1	2	2	1	2	2	2	2	2	1	2	3	4	3	3	3	3	1	1	2	2	1	2	2	2	2	2	1	2	3	4	3	3
sp|O95967|FBLN4_HUMAN	sp|O95967|FBLN4_HUMAN	7	7	7	sp|O95967|FBLN4_HUMAN EGF-containing fibulin-like extracellular matrix protein 2 OS=Homo sapiens OX=9606 GN=EFEMP2 PE=1 SV=3	1	7	7	7	0	1	0	1	1	0	5	5	6	6	3	6	1	0	2	0	2	3	0	1	0	1	1	0	5	5	6	6	3	6	1	0	2	0	2	3	0	1	0	1
sp|O95994|AGR2_HUMAN	sp|O95994|AGR2_HUMAN	5	5	5	sp|O95994|AGR2_HUMAN Anterior gradient protein 2 homolog OS=Homo sapiens OX=9606 GN=AGR2 PE=1 SV=1	1	5	5	5	1	1	1	2	1	2	2	3	3	3	3	3	5	5	5	5	5	5	1	1	1	2	1	2	2	3	3	3	3	3	5	5	5	5	5	5	1	1	1	2
sp|O95999|BCL10_HUMAN	sp|O95999|BCL10_HUMAN	1	1	1	sp|O95999|BCL10_HUMAN B-cell lymphoma/leukemia 10 OS=Homo sapiens OX=9606 GN=BCL10 PE=1 SV=1	1	1	1	1	0	0	0	0	0	1	0	0	0	0	0	0	0	1	1	1	0	0	0	0	0	0	0	1	0	0	0	0	0	0	0	1	1	1	0	0	0	0	0	0
sp|O96000|NDUBA_HUMAN	sp|O96000|NDUBA_HUMAN	5	5	5	sp|O96000|NDUBA_HUMAN NADH dehydrogenase [ubiquinone] 1 beta subcomplex subunit 10 OS=Homo sapiens OX=9606 GN=NDUFB10 PE=1 SV=3	1	5	5	5	2	2	2	3	2	4	1	1	1	1	1	1	2	1	1	2	2	2	2	2	2	3	2	4	1	1	1	1	1	1	2	1	1	2	2	2	2	2	2	3
sp|O96007|MOC2B_HUMAN	sp|O96007|MOC2B_HUMAN	1	1	1	sp|O96007|MOC2B_HUMAN Molybdopterin synthase catalytic subunit OS=Homo sapiens OX=9606 GN=MOCS2 PE=1 SV=1	1	1	1	1	0	0	0	0	0	0	0	0	0	0	0	0	1	1	1	1	0	0	0	0	0	0	0	0	0	0	0	0	0	0	1	1	1	1	0	0	0	0	0	0
sp|O96008|TOM40_HUMAN	sp|O96008|TOM40_HUMAN	10	10	10	sp|O96008|TOM40_HUMAN Mitochondrial import receptor subunit TOM40 homolog OS=Homo sapiens OX=9606 GN=TOMM40 PE=1 SV=1	1	10	10	10	6	6	5	7	5	4	0	0	0	0	0	0	3	2	4	3	5	6	6	6	5	7	5	4	0	0	0	0	0	0	3	2	4	3	5	6	6	6	5	7
sp|O96019|ACL6A_HUMAN;sp|O94805|ACL6B_HUMAN	sp|O96019|ACL6A_HUMAN	5;1	5;1	5;1	sp|O96019|ACL6A_HUMAN Actin-like protein 6A OS=Homo sapiens OX=9606 GN=ACTL6A PE=1 SV=1	2	5	5	5	2	3	3	2	3	3	0	0	0	2	0	1	4	5	3	5	4	5	2	3	3	2	3	3	0	0	0	2	0	1	4	5	3	5	4	5	2	3	3	2
sp|P00156|CYB_HUMAN	sp|P00156|CYB_HUMAN	1	1	1	sp|P00156|CYB_HUMAN Cytochrome b OS=Homo sapiens OX=9606 GN=MT-CYB PE=1 SV=2	1	1	1	1	1	1	1	1	1	1	1	0	1	1	1	1	0	0	0	1	1	0	1	1	1	1	1	1	1	0	1	1	1	1	0	0	0	1	1	0	1	1	1	1
sp|P00167|CYB5_HUMAN	sp|P00167|CYB5_HUMAN	5	5	5	sp|P00167|CYB5_HUMAN Cytochrome b5 OS=Homo sapiens OX=9606 GN=CYB5A PE=1 SV=2	1	5	5	5	4	4	5	5	4	4	1	1	1	1	0	1	1	3	1	2	1	1	4	4	5	5	4	4	1	1	1	1	0	1	1	3	1	2	1	1	4	4	5	5
sp|P00325|ADH1B_HUMAN;sp|P08319|ADH4_HUMAN	sp|P00325|ADH1B_HUMAN	6;1	6;1	3;1	sp|P00325|ADH1B_HUMAN All-trans-retinol dehydrogenase [NAD(+)] ADH1B OS=Homo sapiens OX=9606 GN=ADH1B PE=1 SV=2	2	6	6	3	1	0	1	0	1	0	2	3	3	3	3	2	1	1	0	1	0	1	1	0	1	0	1	0	2	3	3	3	3	2	1	1	0	1	0	1	0	0	0	0
sp|P00326|ADH1G_HUMAN	sp|P00326|ADH1G_HUMAN	4	2	2	sp|P00326|ADH1G_HUMAN Alcohol dehydrogenase 1C OS=Homo sapiens OX=9606 GN=ADH1C PE=1 SV=2	1	4	2	2	0	0	0	0	0	0	0	0	0	0	0	0	1	1	3	1	1	2	0	0	0	0	0	0	0	0	0	0	0	0	0	0	2	0	0	0	0	0	0	0
sp|P00338|LDHA_HUMAN	sp|P00338|LDHA_HUMAN	19	19	18	sp|P00338|LDHA_HUMAN L-lactate dehydrogenase A chain OS=Homo sapiens OX=9606 GN=LDHA PE=1 SV=2	1	19	19	18	13	14	14	14	14	14	10	11	12	10	14	11	13	16	17	14	16	17	13	14	14	14	14	14	10	11	12	10	14	11	13	16	17	14	16	17	12	13	13	13
sp|P00352|AL1A1_HUMAN	sp|P00352|AL1A1_HUMAN	24	24	21	sp|P00352|AL1A1_HUMAN Retinal dehydrogenase 1 OS=Homo sapiens OX=9606 GN=ALDH1A1 PE=1 SV=2	1	24	24	21	5	5	5	5	5	4	18	21	20	20	18	19	8	5	6	6	7	8	5	5	5	5	5	4	18	21	20	20	18	19	8	5	6	6	7	8	4	4	4	4
sp|P00367|DHE3_HUMAN;sp|P49448|DHE4_HUMAN	sp|P00367|DHE3_HUMAN;sp|P49448|DHE4_HUMAN	19;11	19;11	19;11	sp|P00367|DHE3_HUMAN Glutamate dehydrogenase 1, mitochondrial OS=Homo sapiens OX=9606 GN=GLUD1 PE=1 SV=2;sp|P49448|DHE4_HUMAN Glutamate dehydrogenase 2, mitochondrial OS=Homo sapiens OX=9606 GN=GLUD2 PE=1 SV=2	2	19	19	19	10	10	9	9	12	10	10	10	11	12	10	12	15	14	15	12	13	13	10	10	9	9	12	10	10	10	11	12	10	12	15	14	15	12	13	13	10	10	9	9
sp|P00387|NB5R3_HUMAN	sp|P00387|NB5R3_HUMAN	12	12	12	sp|P00387|NB5R3_HUMAN NADH-cytochrome b5 reductase 3 OS=Homo sapiens OX=9606 GN=CYB5R3 PE=1 SV=3	1	12	12	12	10	9	10	9	9	11	6	6	6	6	7	7	7	9	8	8	9	6	10	9	10	9	9	11	6	6	6	6	7	7	7	9	8	8	9	6	10	9	10	9
sp|P00390|GSHR_HUMAN	sp|P00390|GSHR_HUMAN	12	12	12	sp|P00390|GSHR_HUMAN Glutathione reductase, mitochondrial OS=Homo sapiens OX=9606 GN=GSR PE=1 SV=2	1	12	12	12	4	4	3	5	3	2	8	6	10	7	6	6	3	3	2	3	3	3	4	4	3	5	3	2	8	6	10	7	6	6	3	3	2	3	3	3	4	4	3	5
sp|P00403|COX2_HUMAN	sp|P00403|COX2_HUMAN	6	6	6	sp|P00403|COX2_HUMAN Cytochrome c oxidase subunit 2 OS=Homo sapiens OX=9606 GN=MT-CO2 PE=1 SV=1	1	6	6	6	5	5	5	5	5	6	4	3	3	3	4	2	2	3	4	2	3	4	5	5	5	5	5	6	4	3	3	3	4	2	2	3	4	2	3	4	5	5	5	5
sp|P00414|COX3_HUMAN	sp|P00414|COX3_HUMAN	2	2	2	sp|P00414|COX3_HUMAN Cytochrome c oxidase subunit 3 OS=Homo sapiens OX=9606 GN=MT-CO3 PE=1 SV=2	1	2	2	2	2	1	1	2	2	1	0	0	1	1	1	0	1	1	1	1	1	2	2	1	1	2	2	1	0	0	1	1	1	0	1	1	1	1	1	2	2	1	1	2
sp|P00441|SODC_HUMAN	sp|P00441|SODC_HUMAN	7	7	7	sp|P00441|SODC_HUMAN Superoxide dismutase [Cu-Zn] OS=Homo sapiens OX=9606 GN=SOD1 PE=1 SV=2	1	7	7	7	6	7	4	6	5	6	6	6	6	6	6	6	7	7	5	6	6	5	6	7	4	6	5	6	6	6	6	6	6	6	7	7	5	6	6	5	6	7	4	6
sp|P00450|CERU_HUMAN;CON__ENSEMBL:ENSBTAP00000031900	sp|P00450|CERU_HUMAN	35;5	35;5	35;5	sp|P00450|CERU_HUMAN Ceruloplasmin OS=Homo sapiens OX=9606 GN=CP PE=1 SV=1	2	35	35	35	23	20	20	21	21	19	29	31	30	32	29	29	22	22	23	20	25	20	23	20	20	21	21	19	29	31	30	32	29	29	22	22	23	20	25	20	23	20	20	21
sp|P00488|F13A_HUMAN	sp|P00488|F13A_HUMAN	14	14	14	sp|P00488|F13A_HUMAN Coagulation factor XIII A chain OS=Homo sapiens OX=9606 GN=F13A1 PE=1 SV=4	1	14	14	14	4	5	5	5	6	8	7	8	9	8	8	8	10	10	8	7	9	7	4	5	5	5	6	8	7	8	9	8	8	8	10	10	8	7	9	7	4	5	5	5
sp|P00491|PNPH_HUMAN	sp|P00491|PNPH_HUMAN	14	14	14	sp|P00491|PNPH_HUMAN Purine nucleoside phosphorylase OS=Homo sapiens OX=9606 GN=PNP PE=1 SV=2	1	14	14	14	12	12	12	12	11	12	9	9	8	11	10	9	11	11	11	11	11	12	12	12	12	12	11	12	9	9	8	11	10	9	11	11	11	11	11	12	12	12	12	12
sp|P00492|HPRT_HUMAN	sp|P00492|HPRT_HUMAN	10	10	10	sp|P00492|HPRT_HUMAN Hypoxanthine-guanine phosphoribosyltransferase OS=Homo sapiens OX=9606 GN=HPRT1 PE=1 SV=2	1	10	10	10	3	4	4	4	3	3	4	5	5	3	5	4	5	7	5	5	7	7	3	4	4	4	3	3	4	5	5	3	5	4	5	7	5	5	7	7	3	4	4	4
sp|P00505|AATM_HUMAN	sp|P00505|AATM_HUMAN	20	20	20	sp|P00505|AATM_HUMAN Aspartate aminotransferase, mitochondrial OS=Homo sapiens OX=9606 GN=GOT2 PE=1 SV=3	1	20	20	20	15	14	13	14	13	13	15	14	10	14	14	13	13	13	15	10	17	12	15	14	13	14	13	13	15	14	10	14	14	13	13	13	15	10	17	12	15	14	13	14
sp|P00533|EGFR_HUMAN;sp|P04626|ERBB2_HUMAN;sp|Q15303|ERBB4_HUMAN	sp|P00533|EGFR_HUMAN	15;2;1	15;2;1	15;2;1	sp|P00533|EGFR_HUMAN Epidermal growth factor receptor OS=Homo sapiens OX=9606 GN=EGFR PE=1 SV=2	3	15	15	15	0	0	0	0	0	0	0	0	0	0	1	1	10	8	10	6	8	8	0	0	0	0	0	0	0	0	0	0	1	1	10	8	10	6	8	8	0	0	0	0
sp|P00558|PGK1_HUMAN;sp|P07205|PGK2_HUMAN	sp|P00558|PGK1_HUMAN	34;6	34;6	34;6	sp|P00558|PGK1_HUMAN Phosphoglycerate kinase 1 OS=Homo sapiens OX=9606 GN=PGK1 PE=1 SV=3	2	34	34	34	24	30	27	28	29	29	26	24	26	24	24	22	33	32	33	33	33	33	24	30	27	28	29	29	26	24	26	24	24	22	33	32	33	33	33	33	24	30	27	28
sp|P00568|KAD1_HUMAN;sp|Q9Y6K8|KAD5_HUMAN	sp|P00568|KAD1_HUMAN	8;1	8;1	8;1	sp|P00568|KAD1_HUMAN Adenylate kinase isoenzyme 1 OS=Homo sapiens OX=9606 GN=AK1 PE=1 SV=3	2	8	8	8	4	2	5	5	4	4	6	5	4	5	3	6	2	4	4	5	4	3	4	2	5	5	4	4	6	5	4	5	3	6	2	4	4	5	4	3	4	2	5	5
sp|P00734|THRB_HUMAN;CON__P00735	sp|P00734|THRB_HUMAN	28;6	28;6	28;6	sp|P00734|THRB_HUMAN Prothrombin OS=Homo sapiens OX=9606 GN=F2 PE=1 SV=2	2	28	28	28	17	16	18	17	16	17	16	17	17	22	18	18	23	20	24	23	22	22	17	16	18	17	16	17	16	17	17	22	18	18	23	20	24	23	22	22	17	16	18	17
sp|P00736|C1R_HUMAN	sp|P00736|C1R_HUMAN	17	17	16	sp|P00736|C1R_HUMAN Complement C1r subcomponent OS=Homo sapiens OX=9606 GN=C1R PE=1 SV=2	1	17	17	16	5	7	6	8	6	7	10	13	9	11	8	10	7	7	9	9	10	8	5	7	6	8	6	7	10	13	9	11	8	10	7	7	9	9	10	8	5	7	6	8
sp|P00738|HPT_HUMAN	sp|P00738|HPT_HUMAN	29	29	12	sp|P00738|HPT_HUMAN Haptoglobin OS=Homo sapiens OX=9606 GN=HP PE=1 SV=1	1	29	29	12	22	23	22	23	24	24	17	17	15	19	19	20	24	23	22	22	24	23	22	23	22	23	24	24	17	17	15	19	19	20	24	23	22	22	24	23	10	11	8	10
sp|P00739|HPTR_HUMAN	sp|P00739|HPTR_HUMAN	18	1	1	sp|P00739|HPTR_HUMAN Haptoglobin-related protein OS=Homo sapiens OX=9606 GN=HPR PE=2 SV=2	1	18	1	1	12	12	15	14	13	14	8	7	7	8	9	9	15	14	13	14	14	15	0	0	1	1	0	1	0	0	0	0	0	0	0	0	0	0	0	1	0	0	1	1
sp|P00740|FA9_HUMAN	sp|P00740|FA9_HUMAN	4	4	4	sp|P00740|FA9_HUMAN Coagulation factor IX OS=Homo sapiens OX=9606 GN=F9 PE=1 SV=2	1	4	4	4	0	0	0	1	0	0	3	2	3	1	2	2	0	0	0	0	0	0	0	0	0	1	0	0	3	2	3	1	2	2	0	0	0	0	0	0	0	0	0	1
sp|P00742|FA10_HUMAN	sp|P00742|FA10_HUMAN	1	1	1	sp|P00742|FA10_HUMAN Coagulation factor X OS=Homo sapiens OX=9606 GN=F10 PE=1 SV=2	1	1	1	1	1	1	1	0	1	1	1	1	1	1	1	1	1	0	1	0	1	0	1	1	1	0	1	1	1	1	1	1	1	1	1	0	1	0	1	0	1	1	1	0
sp|P00746|CFAD_HUMAN	sp|P00746|CFAD_HUMAN	10	10	10	sp|P00746|CFAD_HUMAN Complement factor D OS=Homo sapiens OX=9606 GN=CFD PE=1 SV=5	1	10	10	10	1	0	0	0	0	0	10	7	8	8	8	8	0	0	0	0	0	0	1	0	0	0	0	0	10	7	8	8	8	8	0	0	0	0	0	0	1	0	0	0
sp|P00747|PLMN_HUMAN;CON__P06868;sp|Q15195|PLGA_HUMAN;sp|Q02325|PLGB_HUMAN	sp|P00747|PLMN_HUMAN	36;5;2;2	36;5;2;2	35;4;2;2	sp|P00747|PLMN_HUMAN Plasminogen OS=Homo sapiens OX=9606 GN=PLG PE=1 SV=2	4	36	36	35	15	16	14	13	14	16	30	30	30	32	31	28	22	26	24	24	23	22	15	16	14	13	14	16	30	30	30	32	31	28	22	26	24	24	23	22	15	16	14	13
sp|P00748|FA12_HUMAN	sp|P00748|FA12_HUMAN	7	7	7	sp|P00748|FA12_HUMAN Coagulation factor XII OS=Homo sapiens OX=9606 GN=F12 PE=1 SV=3	1	7	7	7	0	0	0	0	0	0	6	6	6	6	7	4	0	1	0	0	0	0	0	0	0	0	0	0	6	6	6	6	7	4	0	1	0	0	0	0	0	0	0	0
sp|P00749|UROK_HUMAN	sp|P00749|UROK_HUMAN	1	1	1	sp|P00749|UROK_HUMAN Urokinase-type plasminogen activator OS=Homo sapiens OX=9606 GN=PLAU PE=1 SV=2	1	1	1	1	0	0	0	1	0	1	0	0	0	0	0	0	1	0	1	1	0	1	0	0	0	1	0	1	0	0	0	0	0	0	1	0	1	1	0	1	0	0	0	1
sp|P00751|CFAB_HUMAN	sp|P00751|CFAB_HUMAN	27	27	27	sp|P00751|CFAB_HUMAN Complement factor B OS=Homo sapiens OX=9606 GN=CFB PE=1 SV=2	1	27	27	27	14	13	11	13	14	13	19	19	18	19	21	19	14	16	16	16	14	14	14	13	11	13	14	13	19	19	18	19	21	19	14	16	16	16	14	14	14	13	11	13
sp|P00813|ADA_HUMAN	sp|P00813|ADA_HUMAN	7	7	7	sp|P00813|ADA_HUMAN Adenosine deaminase OS=Homo sapiens OX=9606 GN=ADA PE=1 SV=3	1	7	7	7	0	0	0	0	0	0	0	2	0	0	0	0	4	4	4	6	3	4	0	0	0	0	0	0	0	2	0	0	0	0	4	4	4	6	3	4	0	0	0	0
sp|P00846|ATP6_HUMAN	sp|P00846|ATP6_HUMAN	1	1	1	sp|P00846|ATP6_HUMAN ATP synthase subunit a OS=Homo sapiens OX=9606 GN=MT-ATP6 PE=1 SV=1	1	1	1	1	1	1	1	0	0	1	1	1	1	1	1	1	1	0	1	0	0	0	1	1	1	0	0	1	1	1	1	1	1	1	1	0	1	0	0	0	1	1	1	0
sp|P00915|CAH1_HUMAN	sp|P00915|CAH1_HUMAN	14	14	14	sp|P00915|CAH1_HUMAN Carbonic anhydrase 1 OS=Homo sapiens OX=9606 GN=CA1 PE=1 SV=2	1	14	14	14	12	12	12	13	13	12	11	11	11	12	12	11	12	12	13	13	13	13	12	12	12	13	13	12	11	11	11	12	12	11	12	12	13	13	13	13	12	12	12	13
sp|P00918|CAH2_HUMAN	sp|P00918|CAH2_HUMAN	12	12	12	sp|P00918|CAH2_HUMAN Carbonic anhydrase 2 OS=Homo sapiens OX=9606 GN=CA2 PE=1 SV=2	1	12	12	12	6	6	8	7	7	8	7	7	7	7	8	7	8	11	9	10	8	9	6	6	8	7	7	8	7	7	7	7	8	7	8	11	9	10	8	9	6	6	8	7
sp|P00966|ASSY_HUMAN	sp|P00966|ASSY_HUMAN	7	7	7	sp|P00966|ASSY_HUMAN Argininosuccinate synthase OS=Homo sapiens OX=9606 GN=ASS1 PE=1 SV=2	1	7	7	7	3	3	4	3	3	3	4	2	2	4	3	5	4	4	4	2	4	4	3	3	4	3	3	3	4	2	2	4	3	5	4	4	4	2	4	4	3	3	4	3
sp|P00973|OAS1_HUMAN	sp|P00973|OAS1_HUMAN	4	4	4	sp|P00973|OAS1_HUMAN 2-5-oligoadenylate synthase 1 OS=Homo sapiens OX=9606 GN=OAS1 PE=1 SV=4	1	4	4	4	0	0	0	0	0	0	0	0	0	0	0	0	1	3	2	2	1	2	0	0	0	0	0	0	0	0	0	0	0	0	1	3	2	2	1	2	0	0	0	0
sp|P01008|ANT3_HUMAN;CON__P41361	sp|P01008|ANT3_HUMAN	21;3	21;3	21;3	sp|P01008|ANT3_HUMAN Antithrombin-III OS=Homo sapiens OX=9606 GN=SERPINC1 PE=1 SV=1	2	21	21	21	8	7	8	9	6	9	16	18	18	19	18	18	6	4	5	3	6	4	8	7	8	9	6	9	16	18	18	19	18	18	6	4	5	3	6	4	8	7	8	9
sp|P01009|A1AT_HUMAN;sp|P20848|A1ATR_HUMAN	sp|P01009|A1AT_HUMAN	32;1	32;1	32;1	sp|P01009|A1AT_HUMAN Alpha-1-antitrypsin OS=Homo sapiens OX=9606 GN=SERPINA1 PE=1 SV=3	2	32	32	32	30	29	28	28	26	28	30	30	31	29	30	27	25	23	22	22	23	24	30	29	28	28	26	28	30	30	31	29	30	27	25	23	22	22	23	24	30	29	28	28
sp|P01011|AACT_HUMAN	sp|P01011|AACT_HUMAN	14	14	14	sp|P01011|AACT_HUMAN Alpha-1-antichymotrypsin OS=Homo sapiens OX=9606 GN=SERPINA3 PE=1 SV=2	1	14	14	14	10	8	10	9	8	8	11	10	11	11	12	12	9	10	9	10	9	11	10	8	10	9	8	8	11	10	11	11	12	12	9	10	9	10	9	11	10	8	10	9
sp|P01019|ANGT_HUMAN	sp|P01019|ANGT_HUMAN	9	9	9	sp|P01019|ANGT_HUMAN Angiotensinogen OS=Homo sapiens OX=9606 GN=AGT PE=1 SV=1	1	9	9	9	3	4	4	3	5	4	8	8	7	7	8	7	4	3	4	4	5	3	3	4	4	3	5	4	8	8	7	7	8	7	4	3	4	4	5	3	3	4	4	3
sp|P01023|A2MG_HUMAN	sp|P01023|A2MG_HUMAN	59	59	49	sp|P01023|A2MG_HUMAN Alpha-2-macroglobulin OS=Homo sapiens OX=9606 GN=A2M PE=1 SV=3	1	59	59	49	46	47	46	44	46	46	53	53	55	53	51	54	43	41	44	43	45	45	46	47	46	44	46	46	53	53	55	53	51	54	43	41	44	43	45	45	40	41	41	41
sp|P01024|CO3_HUMAN;sp|O95568|MET18_HUMAN	sp|P01024|CO3_HUMAN	95;1	95;1	87;1	sp|P01024|CO3_HUMAN Complement C3 OS=Homo sapiens OX=9606 GN=C3 PE=1 SV=2	2	95	95	87	67	68	72	70	69	70	74	74	70	73	73	77	69	70	68	68	68	64	67	68	72	70	69	70	74	74	70	73	73	77	69	70	68	68	68	64	64	63	68	66
sp|P01031|CO5_HUMAN;CON__Q1A7A4	sp|P01031|CO5_HUMAN	24;2	24;2	24;2	sp|P01031|CO5_HUMAN Complement C5 OS=Homo sapiens OX=9606 GN=C5 PE=1 SV=4	2	24	24	24	8	8	5	7	7	7	11	10	12	11	11	12	6	6	7	7	9	5	8	8	5	7	7	7	11	10	12	11	11	12	6	6	7	7	9	5	8	8	5	7
sp|P01033|TIMP1_HUMAN	sp|P01033|TIMP1_HUMAN	3	3	3	sp|P01033|TIMP1_HUMAN Metalloproteinase inhibitor 1 OS=Homo sapiens OX=9606 GN=TIMP1 PE=1 SV=1	1	3	3	3	0	2	2	0	0	0	0	1	0	1	1	0	0	0	1	0	1	0	0	2	2	0	0	0	0	1	0	1	1	0	0	0	1	0	1	0	0	2	2	0
sp|P01034|CYTC_HUMAN	sp|P01034|CYTC_HUMAN	3	3	3	sp|P01034|CYTC_HUMAN Cystatin-C OS=Homo sapiens OX=9606 GN=CST3 PE=1 SV=1	1	3	3	3	1	1	1	2	1	1	2	1	2	2	1	0	1	1	1	1	1	1	1	1	1	2	1	1	2	1	2	2	1	0	1	1	1	1	1	1	1	1	1	2
sp|P01037|CYTN_HUMAN;sp|P01036|CYTS_HUMAN;sp|P09228|CYTT_HUMAN	sp|P01037|CYTN_HUMAN;sp|P01036|CYTS_HUMAN	3;2;1	3;2;1	3;2;1	sp|P01037|CYTN_HUMAN Cystatin-SN OS=Homo sapiens OX=9606 GN=CST1 PE=1 SV=3;sp|P01036|CYTS_HUMAN Cystatin-S OS=Homo sapiens OX=9606 GN=CST4 PE=1 SV=3	3	3	3	3	3	3	3	3	3	3	0	0	0	0	0	0	0	0	0	0	0	0	3	3	3	3	3	3	0	0	0	0	0	0	0	0	0	0	0	0	3	3	3	3
sp|P01040|CYTA_HUMAN	sp|P01040|CYTA_HUMAN	2	2	2	sp|P01040|CYTA_HUMAN Cystatin-A OS=Homo sapiens OX=9606 GN=CSTA PE=1 SV=1	1	2	2	2	0	0	0	0	0	0	1	2	0	1	1	1	0	0	0	0	0	0	0	0	0	0	0	0	1	2	0	1	1	1	0	0	0	0	0	0	0	0	0	0
sp|P01042|KNG1_HUMAN;CON__P01045-1;CON__Q2KJ62;CON__P01044-1	sp|P01042|KNG1_HUMAN	18;1;1;1	18;1;1;1	18;1;1;1	sp|P01042|KNG1_HUMAN Kininogen-1 OS=Homo sapiens OX=9606 GN=KNG1 PE=1 SV=2	4	18	18	18	10	11	9	9	10	10	13	13	16	13	13	15	6	6	7	4	7	4	10	11	9	9	10	10	13	13	16	13	13	15	6	6	7	4	7	4	10	11	9	9
sp|P01111|RASN_HUMAN	sp|P01111|RASN_HUMAN	6	6	2	sp|P01111|RASN_HUMAN GTPase NRas OS=Homo sapiens OX=9606 GN=NRAS PE=1 SV=1	1	6	6	2	3	2	2	2	2	2	3	2	4	3	2	3	5	3	4	3	3	5	3	2	2	2	2	2	3	2	4	3	2	3	5	3	4	3	3	5	0	0	0	0
sp|P01112|RASH_HUMAN	sp|P01112|RASH_HUMAN	5	2	1	sp|P01112|RASH_HUMAN GTPase HRas OS=Homo sapiens OX=9606 GN=HRAS PE=1 SV=1	1	5	2	1	3	2	2	2	2	2	3	2	3	3	2	2	3	3	3	4	3	4	1	1	1	1	1	1	1	1	1	1	1	1	1	1	1	2	1	1	0	0	0	0
sp|P01303|NPY_HUMAN	sp|P01303|NPY_HUMAN	1	1	1	sp|P01303|NPY_HUMAN Pro-neuropeptide Y OS=Homo sapiens OX=9606 GN=NPY PE=1 SV=1	1	1	1	1	0	0	0	0	0	0	0	1	1	1	0	1	0	0	0	0	0	0	0	0	0	0	0	0	0	1	1	1	0	1	0	0	0	0	0	0	0	0	0	0
sp|P01591|IGJ_HUMAN	sp|P01591|IGJ_HUMAN	7	7	7	sp|P01591|IGJ_HUMAN Immunoglobulin J chain OS=Homo sapiens OX=9606 GN=JCHAIN PE=1 SV=4	1	7	7	7	3	3	4	3	4	3	6	6	6	6	7	6	2	2	2	2	2	2	3	3	4	3	4	3	6	6	6	6	7	6	2	2	2	2	2	2	3	3	4	3
sp|P01599|KV117_HUMAN	sp|P01599|KV117_HUMAN	1	1	1	sp|P01599|KV117_HUMAN Immunoglobulin kappa variable 1-17 OS=Homo sapiens OX=9606 GN=IGKV1-17 PE=1 SV=2	1	1	1	1	1	1	1	1	1	1	1	1	1	1	1	1	1	1	1	0	1	1	1	1	1	1	1	1	1	1	1	1	1	1	1	1	1	0	1	1	1	1	1	1
sp|P01601|KVD16_HUMAN	sp|P01601|KVD16_HUMAN	1	1	1	sp|P01601|KVD16_HUMAN Immunoglobulin kappa variable 1D-16 OS=Homo sapiens OX=9606 GN=IGKV1D-16 PE=3 SV=2	1	1	1	1	0	0	0	0	0	0	1	1	1	1	1	1	0	0	0	0	0	0	0	0	0	0	0	0	1	1	1	1	1	1	0	0	0	0	0	0	0	0	0	0
sp|P01602|KV105_HUMAN	sp|P01602|KV105_HUMAN	1	1	1	sp|P01602|KV105_HUMAN Immunoglobulin kappa variable 1-5 OS=Homo sapiens OX=9606 GN=IGKV1-5 PE=1 SV=2	1	1	1	1	1	1	1	1	1	0	1	1	1	1	1	1	0	0	0	0	0	0	1	1	1	1	1	0	1	1	1	1	1	1	0	0	0	0	0	0	1	1	1	1
sp|P01614|KVD40_HUMAN;sp|A0A087WW87|KV240_HUMAN	sp|P01614|KVD40_HUMAN;sp|A0A087WW87|KV240_HUMAN	2;2	1;1	1;1	sp|P01614|KVD40_HUMAN Immunoglobulin kappa variable 2D-40 OS=Homo sapiens OX=9606 GN=IGKV2D-40 PE=1 SV=2;sp|A0A087WW87|KV240_HUMAN Immunoglobulin kappa variable 2-40 OS=Homo sapiens OX=9606 GN=IGKV2-40 PE=3 SV=2	2	2	1	1	1	1	1	1	1	1	1	1	2	2	2	2	1	1	1	1	1	1	0	0	0	0	0	0	0	0	1	1	1	1	0	0	0	0	0	0	0	0	0	0
sp|P01615|KVD28_HUMAN;sp|A0A075B6P5|KV228_HUMAN	sp|P01615|KVD28_HUMAN;sp|A0A075B6P5|KV228_HUMAN	2;2	1;1	1;1	sp|P01615|KVD28_HUMAN Immunoglobulin kappa variable 2D-28 OS=Homo sapiens OX=9606 GN=IGKV2D-28 PE=1 SV=2;sp|A0A075B6P5|KV228_HUMAN Immunoglobulin kappa variable 2-28 OS=Homo sapiens OX=9606 GN=IGKV2-28 PE=3 SV=1	2	2	1	1	1	1	1	1	1	1	2	1	2	2	2	2	1	1	1	1	1	1	0	0	0	0	0	0	1	0	1	1	1	1	0	0	0	0	0	0	0	0	0	0
sp|P01619|KV320_HUMAN;sp|A0A0C4DH25|KVD20_HUMAN	sp|P01619|KV320_HUMAN	5;2	5;2	5;2	sp|P01619|KV320_HUMAN Immunoglobulin kappa variable 3-20 OS=Homo sapiens OX=9606 GN=IGKV3-20 PE=1 SV=2	2	5	5	5	2	1	2	2	2	1	3	4	3	3	4	4	1	1	1	1	2	1	2	1	2	2	2	1	3	4	3	3	4	4	1	1	1	1	2	1	2	1	2	2
sp|P01624|KV315_HUMAN;sp|A0A075B6H7|KV37_HUMAN;sp|A0A0C4DH55|KVD07_HUMAN	sp|P01624|KV315_HUMAN;sp|A0A075B6H7|KV37_HUMAN;sp|A0A0C4DH55|KVD07_HUMAN	2;1;1	2;1;1	1;1;1	sp|P01624|KV315_HUMAN Immunoglobulin kappa variable 3-15 OS=Homo sapiens OX=9606 GN=IGKV3-15 PE=1 SV=2;sp|A0A075B6H7|KV37_HUMAN Probable non-functional immunoglobulin kappa variable 3-7 OS=Homo sapiens OX=9606 GN=IGKV3-7 PE=1 SV=1;sp|A0A0C4DH55|KVD07_HUMAN	3	2	2	1	1	1	1	0	1	0	2	2	2	2	2	2	0	1	0	0	1	0	1	1	1	0	1	0	2	2	2	2	2	2	0	1	0	0	1	0	1	1	1	0
sp|P01699|LV144_HUMAN	sp|P01699|LV144_HUMAN	2	1	1	sp|P01699|LV144_HUMAN Immunoglobulin lambda variable 1-44 OS=Homo sapiens OX=9606 GN=IGLV1-44 PE=1 SV=2	1	2	1	1	0	1	0	0	0	0	1	1	0	1	1	0	0	0	0	0	0	0	0	0	0	0	0	0	1	0	0	1	0	0	0	0	0	0	0	0	0	0	0	0
sp|P01700|LV147_HUMAN	sp|P01700|LV147_HUMAN	2	2	1	sp|P01700|LV147_HUMAN Immunoglobulin lambda variable 1-47 OS=Homo sapiens OX=9606 GN=IGLV1-47 PE=1 SV=2	1	2	2	1	1	2	1	1	1	1	1	2	1	1	2	1	1	1	1	1	1	1	1	2	1	1	1	1	1	2	1	1	2	1	1	1	1	1	1	1	1	1	1	1
sp|P01703|LV140_HUMAN	sp|P01703|LV140_HUMAN	2	2	2	sp|P01703|LV140_HUMAN Immunoglobulin lambda variable 1-40 OS=Homo sapiens OX=9606 GN=IGLV1-40 PE=1 SV=2	1	2	2	2	0	0	0	0	0	0	1	1	1	2	1	0	0	0	0	0	0	0	0	0	0	0	0	0	1	1	1	2	1	0	0	0	0	0	0	0	0	0	0	0
sp|P01706|LV211_HUMAN	sp|P01706|LV211_HUMAN	2	2	1	sp|P01706|LV211_HUMAN Immunoglobulin lambda variable 2-11 OS=Homo sapiens OX=9606 GN=IGLV2-11 PE=1 SV=2	1	2	2	1	0	1	1	1	1	1	1	1	1	1	1	2	0	0	0	0	0	0	0	1	1	1	1	1	1	1	1	1	1	2	0	0	0	0	0	0	0	0	0	0
sp|P01714|LV319_HUMAN	sp|P01714|LV319_HUMAN	3	3	3	sp|P01714|LV319_HUMAN Immunoglobulin lambda variable 3-19 OS=Homo sapiens OX=9606 GN=IGLV3-19 PE=1 SV=2	1	3	3	3	0	1	1	1	1	0	3	2	3	2	2	1	0	0	0	0	0	0	0	1	1	1	1	0	3	2	3	2	2	1	0	0	0	0	0	0	0	1	1	1
sp|P01717|LV325_HUMAN;sp|P01718|LV327_HUMAN	sp|P01717|LV325_HUMAN;sp|P01718|LV327_HUMAN	4;3	2;2	1;1	sp|P01717|LV325_HUMAN Immunoglobulin lambda variable 3-25 OS=Homo sapiens OX=9606 GN=IGLV3-25 PE=1 SV=2;sp|P01718|LV327_HUMAN Immunoglobulin lambda variable 3-27 OS=Homo sapiens OX=9606 GN=IGLV3-27 PE=1 SV=2	2	4	2	1	1	1	0	0	0	2	2	3	3	2	2	3	0	0	0	0	0	0	1	1	0	0	0	2	2	2	2	2	2	2	0	0	0	0	0	0	0	0	0	0
sp|P01721|LV657_HUMAN	sp|P01721|LV657_HUMAN	2	2	2	sp|P01721|LV657_HUMAN Immunoglobulin lambda variable 6-57 OS=Homo sapiens OX=9606 GN=IGLV6-57 PE=1 SV=2	1	2	2	2	0	0	0	0	0	0	1	2	1	2	2	1	0	0	0	0	0	0	0	0	0	0	0	0	1	2	1	2	2	1	0	0	0	0	0	0	0	0	0	0
sp|P01743|HV146_HUMAN	sp|P01743|HV146_HUMAN	2	2	1	sp|P01743|HV146_HUMAN Immunoglobulin heavy variable 1-46 OS=Homo sapiens OX=9606 GN=IGHV1-46 PE=1 SV=2	1	2	2	1	2	2	2	2	2	2	2	2	2	2	2	2	1	1	2	1	2	2	2	2	2	2	2	2	2	2	2	2	2	2	1	1	2	1	2	2	1	1	1	1
sp|P01768|HV330_HUMAN;sp|P0DP03|HVC05_HUMAN;sp|P01764|HV323_HUMAN	sp|P01768|HV330_HUMAN;sp|P0DP03|HVC05_HUMAN;sp|P01764|HV323_HUMAN	4;4;2	1;1;1	1;1;1	sp|P01768|HV330_HUMAN Immunoglobulin heavy variable 3-30 OS=Homo sapiens OX=9606 GN=IGHV3-30 PE=1 SV=2;sp|P0DP03|HVC05_HUMAN Immunoglobulin heavy variable 3-30-5 OS=Homo sapiens OX=9606 GN=IGHV3-30-5 PE=3 SV=1;sp|P01764|HV323_HUMAN Immunoglobulin heavy var	3	4	1	1	2	2	1	2	2	2	3	4	4	3	3	3	2	2	2	1	2	2	1	1	1	1	1	1	1	1	1	1	1	1	1	1	1	1	1	1	1	1	1	1
sp|P01780|HV307_HUMAN;sp|P01763|HV348_HUMAN;sp|P01762|HV311_HUMAN;sp|A0A0B4J1V1|HV321_HUMAN;sp|P01766|HV313_HUMAN;sp|A0A0C4DH32|HV320_HUMAN	sp|P01780|HV307_HUMAN;sp|P01763|HV348_HUMAN;sp|P01762|HV311_HUMAN;sp|A0A0B4J1V1|HV321_HUMAN	4;2;2;2;1;1	4;2;2;2;1;1	2;0;0;0;0;0	sp|P01780|HV307_HUMAN Immunoglobulin heavy variable 3-7 OS=Homo sapiens OX=9606 GN=IGHV3-7 PE=1 SV=2;sp|P01763|HV348_HUMAN Immunoglobulin heavy variable 3-48 OS=Homo sapiens OX=9606 GN=IGHV3-48 PE=1 SV=2;sp|P01762|HV311_HUMAN Immunoglobulin heavy variable	6	4	4	2	3	3	3	3	3	3	4	4	3	4	4	4	2	3	2	3	3	2	3	3	3	3	3	3	4	4	3	4	4	4	2	3	2	3	3	2	1	1	1	1
sp|P01825|HV459_HUMAN;sp|P0DP08|HVD82_HUMAN;sp|P0DP06|HVD34_HUMAN;sp|A0A0C4DH41|HV461_HUMAN;sp|P06331|HV434_HUMAN;sp|P01824|HV439_HUMAN;sp|A0A075B6R2|HV404_HUMAN;sp|P0DP07|HV431_HUMAN;sp|A0A087WSY4|HV432_HUMAN	sp|P01825|HV459_HUMAN;sp|P0DP08|HVD82_HUMAN;sp|P0DP06|HVD34_HUMAN;sp|A0A0C4DH41|HV461_HUMAN;sp|P06331|HV434_HUMAN;sp|P01824|HV439_HUMAN;sp|A0A075B6R2|HV404_HUMAN;sp|P0DP07|HV431_HUMAN;sp|A0A087WSY4|HV432_HUMAN	2;2;2;2;2;2;1;1;1	2;2;2;2;2;2;1;1;1	2;2;2;2;2;2;1;1;1	sp|P01825|HV459_HUMAN Immunoglobulin heavy variable 4-59 OS=Homo sapiens OX=9606 GN=IGHV4-59 PE=1 SV=2;sp|P0DP08|HVD82_HUMAN Immunoglobulin heavy variable 4-38-2 OS=Homo sapiens OX=9606 GN=IGHV4-38-2 PE=3 SV=1;sp|P0DP06|HVD34_HUMAN Immunoglobulin heavy var	9	2	2	2	2	1	2	1	2	2	2	2	2	2	2	2	2	2	1	2	2	1	2	1	2	1	2	2	2	2	2	2	2	2	2	2	1	2	2	1	2	1	2	1
sp|P01833|PIGR_HUMAN	sp|P01833|PIGR_HUMAN	18	18	18	sp|P01833|PIGR_HUMAN Polymeric immunoglobulin receptor OS=Homo sapiens OX=9606 GN=PIGR PE=1 SV=4	1	18	18	18	8	9	8	8	10	8	13	11	13	12	11	13	2	1	1	1	2	1	8	9	8	8	10	8	13	11	13	12	11	13	2	1	1	1	2	1	8	9	8	8
sp|P01834|IGKC_HUMAN	sp|P01834|IGKC_HUMAN	7	7	7	sp|P01834|IGKC_HUMAN Immunoglobulin kappa constant OS=Homo sapiens OX=9606 GN=IGKC PE=1 SV=2	1	7	7	7	7	7	7	7	7	7	7	7	7	7	7	7	7	7	7	7	7	7	7	7	7	7	7	7	7	7	7	7	7	7	7	7	7	7	7	7	7	7	7	7
sp|P01857|IGHG1_HUMAN	sp|P01857|IGHG1_HUMAN	20	20	9	sp|P01857|IGHG1_HUMAN Immunoglobulin heavy constant gamma 1 OS=Homo sapiens OX=9606 GN=IGHG1 PE=1 SV=1	1	20	20	9	15	15	15	15	15	15	17	18	18	17	17	17	16	14	16	15	15	17	15	15	15	15	15	15	17	18	18	17	17	17	16	14	16	15	15	17	7	7	7	7
sp|P01859|IGHG2_HUMAN	sp|P01859|IGHG2_HUMAN	17	8	7	sp|P01859|IGHG2_HUMAN Immunoglobulin heavy constant gamma 2 OS=Homo sapiens OX=9606 GN=IGHG2 PE=1 SV=2	1	17	8	7	13	12	12	13	12	11	14	16	15	15	13	14	14	12	14	13	12	13	7	6	6	7	6	6	8	8	8	8	7	7	7	6	7	7	6	7	6	5	5	6
sp|P01860|IGHG3_HUMAN	sp|P01860|IGHG3_HUMAN	19	10	7	sp|P01860|IGHG3_HUMAN Immunoglobulin heavy constant gamma 3 OS=Homo sapiens OX=9606 GN=IGHG3 PE=1 SV=2	1	19	10	7	13	13	13	13	13	12	15	17	15	15	15	16	13	11	13	13	12	14	7	7	7	7	7	6	9	10	8	8	9	10	6	6	6	7	6	7	5	5	5	5
sp|P01861|IGHG4_HUMAN	sp|P01861|IGHG4_HUMAN	13	5	5	sp|P01861|IGHG4_HUMAN Immunoglobulin heavy constant gamma 4 OS=Homo sapiens OX=9606 GN=IGHG4 PE=1 SV=1	1	13	5	5	9	10	10	9	8	9	10	12	12	12	11	11	8	8	8	9	8	9	3	4	4	3	2	4	4	5	5	5	5	5	2	2	2	3	2	2	3	4	4	3
sp|P01871|IGHM_HUMAN	sp|P01871|IGHM_HUMAN	22	22	22	sp|P01871|IGHM_HUMAN Immunoglobulin heavy constant mu OS=Homo sapiens OX=9606 GN=IGHM PE=1 SV=4	1	22	22	22	16	18	17	18	16	15	18	17	19	16	17	15	15	15	15	15	14	15	16	18	17	18	16	15	18	17	19	16	17	15	15	15	15	15	14	15	16	18	17	18
sp|P01876|IGHA1_HUMAN	sp|P01876|IGHA1_HUMAN	15	15	10	sp|P01876|IGHA1_HUMAN Immunoglobulin heavy constant alpha 1 OS=Homo sapiens OX=9606 GN=IGHA1 PE=1 SV=2	1	15	15	10	11	12	11	11	11	11	14	13	13	14	13	13	10	11	11	10	11	10	11	12	11	11	11	11	14	13	13	14	13	13	10	11	11	10	11	10	8	8	8	8
sp|P01877|IGHA2_HUMAN	sp|P01877|IGHA2_HUMAN	13	8	8	sp|P01877|IGHA2_HUMAN Immunoglobulin heavy constant alpha 2 OS=Homo sapiens OX=9606 GN=IGHA2 PE=1 SV=4	1	13	8	8	6	7	7	6	6	6	13	11	12	12	12	11	7	7	7	7	7	7	3	3	4	3	3	3	8	7	8	7	8	7	5	5	5	5	5	5	3	3	4	3
sp|P01889|HLAB_HUMAN;sp|P13747|HLAE_HUMAN	sp|P01889|HLAB_HUMAN	8;2	4;1	2;0	sp|P01889|HLAB_HUMAN HLA class I histocompatibility antigen, B alpha chain OS=Homo sapiens OX=9606 GN=HLA-B PE=1 SV=3	2	8	4	2	3	3	4	3	3	4	1	2	2	1	1	3	5	5	5	7	6	4	1	2	2	2	1	2	1	1	1	1	1	1	2	2	2	4	3	1	1	2	2	2
sp|P01893|HLAH_HUMAN	sp|P01893|HLAH_HUMAN	6	1	1	sp|P01893|HLAH_HUMAN Putative HLA class I histocompatibility antigen, alpha chain H OS=Homo sapiens OX=9606 GN=HLA-H PE=5 SV=3	1	6	1	1	4	2	4	3	3	4	1	2	1	1	1	2	4	5	4	5	5	4	1	1	1	1	1	1	0	0	0	0	0	0	1	1	1	1	1	1	1	1	1	1
sp|P01903|DRA_HUMAN	sp|P01903|DRA_HUMAN	7	7	6	sp|P01903|DRA_HUMAN HLA class II histocompatibility antigen, DR alpha chain OS=Homo sapiens OX=9606 GN=HLA-DRA PE=1 SV=2	1	7	7	6	6	5	7	6	7	5	1	2	2	1	2	2	3	2	2	3	3	3	6	5	7	6	7	5	1	2	2	1	2	2	3	2	2	3	3	3	5	4	6	5
sp|P01906|DQA2_HUMAN	sp|P01906|DQA2_HUMAN	2	1	1	sp|P01906|DQA2_HUMAN HLA class II histocompatibility antigen, DQ alpha 2 chain OS=Homo sapiens OX=9606 GN=HLA-DQA2 PE=1 SV=2	1	2	1	1	2	1	1	1	1	1	1	1	0	0	0	0	1	0	0	1	1	1	1	0	0	0	0	0	1	1	0	0	0	0	0	0	0	0	0	0	1	0	0	0
sp|P01909|DQA1_HUMAN	sp|P01909|DQA1_HUMAN	1	1	1	sp|P01909|DQA1_HUMAN HLA class II histocompatibility antigen, DQ alpha 1 chain OS=Homo sapiens OX=9606 GN=HLA-DQA1 PE=1 SV=1	1	1	1	1	0	1	1	0	1	1	0	0	0	0	0	0	0	0	0	0	0	0	0	1	1	0	1	1	0	0	0	0	0	0	0	0	0	0	0	0	0	1	1	0
sp|P01911|DRB1_HUMAN	sp|P01911|DRB1_HUMAN	4	3	1	sp|P01911|DRB1_HUMAN HLA class II histocompatibility antigen, DRB1 beta chain OS=Homo sapiens OX=9606 GN=HLA-DRB1 PE=1 SV=2	1	4	3	1	3	3	2	3	2	3	0	0	1	0	0	0	2	3	3	2	0	0	2	2	1	2	2	2	0	0	1	0	0	0	1	2	2	1	0	0	1	1	0	1
sp|P01920|DQB1_HUMAN	sp|P01920|DQB1_HUMAN	2	2	2	sp|P01920|DQB1_HUMAN HLA class II histocompatibility antigen, DQ beta 1 chain OS=Homo sapiens OX=9606 GN=HLA-DQB1 PE=1 SV=2	1	2	2	2	1	1	2	2	1	1	0	0	0	0	0	0	0	0	0	0	0	0	1	1	2	2	1	1	0	0	0	0	0	0	0	0	0	0	0	0	1	1	2	2
sp|P02042|HBD_HUMAN	sp|P02042|HBD_HUMAN	15	7	7	sp|P02042|HBD_HUMAN Hemoglobin subunit delta OS=Homo sapiens OX=9606 GN=HBD PE=1 SV=2	1	15	7	7	14	15	14	15	15	14	14	14	14	14	14	14	15	15	15	15	14	15	7	7	7	7	7	7	7	7	7	7	7	7	7	7	7	7	7	7	7	7	7	7
sp|P02100|HBE_HUMAN	sp|P02100|HBE_HUMAN	3	1	1	sp|P02100|HBE_HUMAN Hemoglobin subunit epsilon OS=Homo sapiens OX=9606 GN=HBE1 PE=1 SV=2	1	3	1	1	3	3	3	3	3	3	3	3	3	3	3	2	2	3	3	3	3	3	1	1	1	1	1	1	1	1	1	1	1	0	0	1	1	1	1	1	1	1	1	1
sp|P02452|CO1A1_HUMAN;CON__Q862S4	sp|P02452|CO1A1_HUMAN	22;1	22;1	21;1	sp|P02452|CO1A1_HUMAN Collagen alpha-1(I) chain OS=Homo sapiens OX=9606 GN=COL1A1 PE=1 SV=5	2	22	22	21	8	6	6	6	5	5	18	17	15	17	17	15	3	2	3	3	2	3	8	6	6	6	5	5	18	17	15	17	17	15	3	2	3	3	2	3	8	6	6	6
sp|P02461|CO3A1_HUMAN;CON__P04258	sp|P02461|CO3A1_HUMAN	5;2	5;2	4;1	sp|P02461|CO3A1_HUMAN Collagen alpha-1(III) chain OS=Homo sapiens OX=9606 GN=COL3A1 PE=1 SV=4	2	5	5	4	0	0	0	0	0	0	3	3	4	3	5	4	1	1	0	1	0	1	0	0	0	0	0	0	3	3	4	3	5	4	1	1	0	1	0	1	0	0	0	0
sp|P02462|CO4A1_HUMAN;sp|P29400|CO4A5_HUMAN	sp|P02462|CO4A1_HUMAN;sp|P29400|CO4A5_HUMAN	4;2	4;2	4;2	sp|P02462|CO4A1_HUMAN Collagen alpha-1(IV) chain OS=Homo sapiens OX=9606 GN=COL4A1 PE=1 SV=4;sp|P29400|CO4A5_HUMAN Collagen alpha-5(IV) chain OS=Homo sapiens OX=9606 GN=COL4A5 PE=1 SV=2	2	4	4	4	2	2	1	2	2	1	3	3	2	2	2	3	0	0	0	0	0	0	2	2	1	2	2	1	3	3	2	2	2	3	0	0	0	0	0	0	2	2	1	2
sp|P02511|CRYAB_HUMAN	sp|P02511|CRYAB_HUMAN	9	9	9	sp|P02511|CRYAB_HUMAN Alpha-crystallin B chain OS=Homo sapiens OX=9606 GN=CRYAB PE=1 SV=2	1	9	9	9	7	6	6	6	6	6	7	7	8	8	7	9	7	5	7	7	6	6	7	6	6	6	6	6	7	7	8	8	7	9	7	5	7	7	6	6	7	6	6	6
sp|P02533|K1C14_HUMAN;CON__P02533;CON__Q9D312;sp|Q7Z3Y9|K1C26_HUMAN;CON__Q7Z3Y9	sp|P02533|K1C14_HUMAN;CON__P02533	39;39;3;1;1	23;23;0;0;0	8;8;0;0;0	sp|P02533|K1C14_HUMAN Keratin, type I cytoskeletal 14 OS=Homo sapiens OX=9606 GN=KRT14 PE=1 SV=4;	5	39	23	8	19	19	17	18	21	21	21	19	21	20	17	17	37	36	37	35	38	36	9	10	8	10	13	12	12	11	13	11	9	12	22	21	21	19	23	20	4	4	3	5
sp|P02545|LMNA_HUMAN;REV__sp|Q5VX52|SPAT1_HUMAN	sp|P02545|LMNA_HUMAN	51;1	51;1	49;1	sp|P02545|LMNA_HUMAN Prelamin-A/C OS=Homo sapiens OX=9606 GN=LMNA PE=1 SV=1	2	51	51	49	36	36	37	36	38	36	41	41	42	42	41	40	40	41	42	43	42	40	36	36	37	36	38	36	41	41	42	42	41	40	40	41	42	43	42	40	35	35	36	35
sp|P02549|SPTA1_HUMAN	sp|P02549|SPTA1_HUMAN	68	68	68	sp|P02549|SPTA1_HUMAN Spectrin alpha chain, erythrocytic 1 OS=Homo sapiens OX=9606 GN=SPTA1 PE=1 SV=5	1	68	68	68	21	16	21	17	23	19	27	26	29	27	22	23	39	36	38	35	36	36	21	16	21	17	23	19	27	26	29	27	22	23	39	36	38	35	36	36	21	16	21	17
sp|P02647|APOA1_HUMAN;CON__P15497	sp|P02647|APOA1_HUMAN	29;1	29;1	29;1	sp|P02647|APOA1_HUMAN Apolipoprotein A-I OS=Homo sapiens OX=9606 GN=APOA1 PE=1 SV=1	2	29	29	29	21	23	19	19	22	22	27	26	26	24	28	26	21	18	22	22	18	20	21	23	19	19	22	22	27	26	26	24	28	26	21	18	22	22	18	20	21	23	19	19
sp|P02649|APOE_HUMAN;CON__Q03247	sp|P02649|APOE_HUMAN	14;2	14;2	14;2	sp|P02649|APOE_HUMAN Apolipoprotein E OS=Homo sapiens OX=9606 GN=APOE PE=1 SV=1	2	14	14	14	10	8	11	10	10	10	10	11	10	10	11	13	8	6	7	5	7	7	10	8	11	10	10	10	10	11	10	10	11	13	8	6	7	5	7	7	10	8	11	10
sp|P02652|APOA2_HUMAN	sp|P02652|APOA2_HUMAN	5	5	5	sp|P02652|APOA2_HUMAN Apolipoprotein A-II OS=Homo sapiens OX=9606 GN=APOA2 PE=1 SV=1	1	5	5	5	4	4	5	4	4	4	5	5	5	5	4	4	5	5	5	5	5	5	4	4	5	4	4	4	5	5	5	5	4	4	5	5	5	5	5	5	4	4	5	4
sp|P02654|APOC1_HUMAN	sp|P02654|APOC1_HUMAN	4	4	4	sp|P02654|APOC1_HUMAN Apolipoprotein C-I OS=Homo sapiens OX=9606 GN=APOC1 PE=1 SV=1	1	4	4	4	1	1	1	2	1	1	3	2	3	3	3	3	2	1	1	2	1	2	1	1	1	2	1	1	3	2	3	3	3	3	2	1	1	2	1	2	1	1	1	2
sp|P02655|APOC2_HUMAN	sp|P02655|APOC2_HUMAN	3	3	3	sp|P02655|APOC2_HUMAN Apolipoprotein C-II OS=Homo sapiens OX=9606 GN=APOC2 PE=1 SV=1	1	3	3	3	2	2	2	1	2	2	3	3	2	3	3	3	2	2	2	2	2	1	2	2	2	1	2	2	3	3	2	3	3	3	2	2	2	2	2	1	2	2	2	1
sp|P02656|APOC3_HUMAN	sp|P02656|APOC3_HUMAN	4	4	4	sp|P02656|APOC3_HUMAN Apolipoprotein C-III OS=Homo sapiens OX=9606 GN=APOC3 PE=1 SV=1	1	4	4	4	2	2	2	2	3	2	3	2	3	4	3	3	1	1	2	1	2	1	2	2	2	2	3	2	3	2	3	4	3	3	1	1	2	1	2	1	2	2	2	2
sp|P02671|FIBA_HUMAN;CON__P02672	sp|P02671|FIBA_HUMAN	28;1	28;1	28;1	sp|P02671|FIBA_HUMAN Fibrinogen alpha chain OS=Homo sapiens OX=9606 GN=FGA PE=1 SV=2	2	28	28	28	24	24	23	21	23	20	21	21	20	22	21	21	22	20	20	21	20	22	24	24	23	21	23	20	21	21	20	22	21	21	22	20	20	21	20	22	24	24	23	21
sp|P02675|FIBB_HUMAN;CON__P02676	sp|P02675|FIBB_HUMAN	33;5	33;5	33;5	sp|P02675|FIBB_HUMAN Fibrinogen beta chain OS=Homo sapiens OX=9606 GN=FGB PE=1 SV=2	2	33	33	33	27	26	24	26	26	25	26	27	26	26	29	30	28	26	27	26	27	26	27	26	24	26	26	25	26	27	26	26	29	30	28	26	27	26	27	26	27	26	24	26
sp|P02679|FIBG_HUMAN	sp|P02679|FIBG_HUMAN	23	23	23	sp|P02679|FIBG_HUMAN Fibrinogen gamma chain OS=Homo sapiens OX=9606 GN=FGG PE=1 SV=3	1	23	23	23	19	17	20	20	20	20	17	19	20	20	20	18	18	19	16	17	16	17	19	17	20	20	20	20	17	19	20	20	20	18	18	19	16	17	16	17	19	17	20	20
sp|P02724|GLPA_HUMAN	sp|P02724|GLPA_HUMAN	1	1	1	sp|P02724|GLPA_HUMAN Glycophorin-A OS=Homo sapiens OX=9606 GN=GYPA PE=1 SV=2	1	1	1	1	0	1	1	0	0	0	0	0	1	1	0	1	1	1	1	1	1	1	0	1	1	0	0	0	0	0	1	1	0	1	1	1	1	1	1	1	0	1	1	0
sp|P02730|B3AT_HUMAN	sp|P02730|B3AT_HUMAN	26	26	26	sp|P02730|B3AT_HUMAN Band 3 anion transport protein OS=Homo sapiens OX=9606 GN=SLC4A1 PE=1 SV=3	1	26	26	26	18	21	18	18	21	20	18	21	20	19	21	18	23	21	24	22	24	23	18	21	18	18	21	20	18	21	20	19	21	18	23	21	24	22	24	23	18	21	18	18
sp|P02743|SAMP_HUMAN	sp|P02743|SAMP_HUMAN	5	5	5	sp|P02743|SAMP_HUMAN Serum amyloid P-component OS=Homo sapiens OX=9606 GN=APCS PE=1 SV=2	1	5	5	5	3	1	4	2	2	3	3	3	3	4	3	4	2	3	3	3	3	2	3	1	4	2	2	3	3	3	3	4	3	4	2	3	3	3	3	2	3	1	4	2
sp|P02745|C1QA_HUMAN	sp|P02745|C1QA_HUMAN	2	2	2	sp|P02745|C1QA_HUMAN Complement C1q subcomponent subunit A OS=Homo sapiens OX=9606 GN=C1QA PE=1 SV=2	1	2	2	2	0	0	0	0	0	0	0	0	0	0	0	0	1	1	1	1	2	2	0	0	0	0	0	0	0	0	0	0	0	0	1	1	1	1	2	2	0	0	0	0
sp|P02746|C1QB_HUMAN	sp|P02746|C1QB_HUMAN	4	4	4	sp|P02746|C1QB_HUMAN Complement C1q subcomponent subunit B OS=Homo sapiens OX=9606 GN=C1QB PE=1 SV=3	1	4	4	4	2	1	2	1	2	2	4	4	2	3	4	4	2	3	2	3	3	2	2	1	2	1	2	2	4	4	2	3	4	4	2	3	2	3	3	2	2	1	2	1
sp|P02747|C1QC_HUMAN	sp|P02747|C1QC_HUMAN	4	4	4	sp|P02747|C1QC_HUMAN Complement C1q subcomponent subunit C OS=Homo sapiens OX=9606 GN=C1QC PE=1 SV=3	1	4	4	4	0	2	2	2	3	3	2	4	4	3	4	4	3	2	3	3	3	3	0	2	2	2	3	3	2	4	4	3	4	4	3	2	3	3	3	3	0	2	2	2
sp|P02748|CO9_HUMAN;CON__Q3MHN2	sp|P02748|CO9_HUMAN	10;2	10;2	10;2	sp|P02748|CO9_HUMAN Complement component C9 OS=Homo sapiens OX=9606 GN=C9 PE=1 SV=2	2	10	10	10	4	5	5	3	3	2	6	6	8	6	8	8	4	4	3	5	4	3	4	5	5	3	3	2	6	6	8	6	8	8	4	4	3	5	4	3	4	5	5	3
sp|P02749|APOH_HUMAN;CON__P17690	sp|P02749|APOH_HUMAN	12;1	12;1	12;1	sp|P02749|APOH_HUMAN Beta-2-glycoprotein 1 OS=Homo sapiens OX=9606 GN=APOH PE=1 SV=3	2	12	12	12	10	10	10	9	9	9	9	9	9	9	9	10	7	7	6	7	7	6	10	10	10	9	9	9	9	9	9	9	9	10	7	7	6	7	7	6	10	10	10	9
sp|P02750|A2GL_HUMAN	sp|P02750|A2GL_HUMAN	5	5	5	sp|P02750|A2GL_HUMAN Leucine-rich alpha-2-glycoprotein OS=Homo sapiens OX=9606 GN=LRG1 PE=1 SV=2	1	5	5	5	3	4	2	2	2	2	5	4	3	4	2	3	2	2	2	2	1	1	3	4	2	2	2	2	5	4	3	4	2	3	2	2	2	2	1	1	3	4	2	2
sp|P02751|FINC_HUMAN	sp|P02751|FINC_HUMAN	64	64	64	sp|P02751|FINC_HUMAN Fibronectin OS=Homo sapiens OX=9606 GN=FN1 PE=1 SV=5	1	64	64	64	41	40	41	42	41	43	37	38	37	37	42	37	50	47	49	44	49	47	41	40	41	42	41	43	37	38	37	37	42	37	50	47	49	44	49	47	41	40	41	42
sp|P02753|RET4_HUMAN	sp|P02753|RET4_HUMAN	6	6	6	sp|P02753|RET4_HUMAN Retinol-binding protein 4 OS=Homo sapiens OX=9606 GN=RBP4 PE=1 SV=3	1	6	6	6	1	0	1	1	0	1	4	3	3	2	1	3	0	0	0	0	0	0	1	0	1	1	0	1	4	3	3	2	1	3	0	0	0	0	0	0	1	0	1	1
sp|P02760|AMBP_HUMAN;CON__P00978	sp|P02760|AMBP_HUMAN	13;1	13;1	13;1	sp|P02760|AMBP_HUMAN Protein AMBP OS=Homo sapiens OX=9606 GN=AMBP PE=1 SV=1	2	13	13	13	9	10	8	8	8	9	12	12	12	13	12	11	8	6	8	9	6	9	9	10	8	8	8	9	12	12	12	13	12	11	8	6	8	9	6	9	9	10	8	8
sp|P02763|A1AG1_HUMAN	sp|P02763|A1AG1_HUMAN	10	10	7	sp|P02763|A1AG1_HUMAN Alpha-1-acid glycoprotein 1 OS=Homo sapiens OX=9606 GN=ORM1 PE=1 SV=1	1	10	10	7	9	10	9	9	9	9	9	9	10	10	9	10	7	8	7	7	8	8	9	10	9	9	9	9	9	9	10	10	9	10	7	8	7	7	8	8	7	7	7	7
sp|P02765|FETUA_HUMAN;CON__P12763	sp|P02765|FETUA_HUMAN	7;1	7;1	7;1	sp|P02765|FETUA_HUMAN Alpha-2-HS-glycoprotein OS=Homo sapiens OX=9606 GN=AHSG PE=1 SV=2	2	7	7	7	5	5	6	6	6	5	7	7	7	7	7	7	5	5	5	5	5	5	5	5	6	6	6	5	7	7	7	7	7	7	5	5	5	5	5	5	5	5	6	6
sp|P02766|TTHY_HUMAN	sp|P02766|TTHY_HUMAN	10	10	10	sp|P02766|TTHY_HUMAN Transthyretin OS=Homo sapiens OX=9606 GN=TTR PE=1 SV=1	1	10	10	10	7	7	6	6	6	6	8	8	8	8	8	9	3	5	3	5	2	4	7	7	6	6	6	6	8	8	8	8	8	9	3	5	3	5	2	4	7	7	6	6
sp|P02774|VTDB_HUMAN;CON__Q3MHN5;CON__ENSEMBL:ENSBTAP00000018229	sp|P02774|VTDB_HUMAN	32;6;6	32;6;6	32;6;6	sp|P02774|VTDB_HUMAN Vitamin D-binding protein OS=Homo sapiens OX=9606 GN=GC PE=1 SV=2	3	32	32	32	16	17	16	17	16	17	25	27	26	28	25	28	18	17	16	15	17	15	16	17	16	17	16	17	25	27	26	28	25	28	18	17	16	15	17	15	16	17	16	17
sp|P02775|CXCL7_HUMAN	sp|P02775|CXCL7_HUMAN	4	4	4	sp|P02775|CXCL7_HUMAN Platelet basic protein OS=Homo sapiens OX=9606 GN=PPBP PE=1 SV=3	1	4	4	4	2	3	3	3	3	2	2	2	2	2	2	3	1	1	1	2	2	2	2	3	3	3	3	2	2	2	2	2	2	3	1	1	1	2	2	2	2	3	3	3
sp|P02776|PLF4_HUMAN;sp|P10720|PF4V_HUMAN	sp|P02776|PLF4_HUMAN;sp|P10720|PF4V_HUMAN	3;2	3;2	3;2	sp|P02776|PLF4_HUMAN Platelet factor 4 OS=Homo sapiens OX=9606 GN=PF4 PE=1 SV=2;sp|P10720|PF4V_HUMAN Platelet factor 4 variant OS=Homo sapiens OX=9606 GN=PF4V1 PE=1 SV=1	2	3	3	3	2	2	1	2	2	1	2	1	2	2	1	1	1	2	2	2	2	2	2	2	1	2	2	1	2	1	2	2	1	1	1	2	2	2	2	2	2	2	1	2
sp|P02786|TFR1_HUMAN	sp|P02786|TFR1_HUMAN	18	18	18	sp|P02786|TFR1_HUMAN Transferrin receptor protein 1 OS=Homo sapiens OX=9606 GN=TFRC PE=1 SV=2	1	18	18	18	8	6	7	9	8	7	0	0	2	1	3	2	9	11	9	10	11	8	8	6	7	9	8	7	0	0	2	1	3	2	9	11	9	10	11	8	8	6	7	9
sp|P02787|TRFE_HUMAN;CON__Q2HJF0	sp|P02787|TRFE_HUMAN	54;2	54;2	52;1	sp|P02787|TRFE_HUMAN Serotransferrin OS=Homo sapiens OX=9606 GN=TF PE=1 SV=3	2	54	54	52	40	40	40	41	40	39	45	45	46	47	47	42	39	40	38	38	41	39	40	40	40	41	40	39	45	45	46	47	47	42	39	40	38	38	41	39	39	39	39	40
sp|P02788|TRFL_HUMAN	sp|P02788|TRFL_HUMAN	25	25	23	sp|P02788|TRFL_HUMAN Lactotransferrin OS=Homo sapiens OX=9606 GN=LTF PE=1 SV=6	1	25	25	23	13	14	15	18	16	16	6	6	7	5	5	6	21	18	18	18	18	22	13	14	15	18	16	16	6	6	7	5	5	6	21	18	18	18	18	22	12	13	13	16
sp|P02790|HEMO_HUMAN	sp|P02790|HEMO_HUMAN	23	23	23	sp|P02790|HEMO_HUMAN Hemopexin OS=Homo sapiens OX=9606 GN=HPX PE=1 SV=2	1	23	23	23	14	14	15	15	14	14	21	20	20	21	21	20	12	10	13	13	13	12	14	14	15	15	14	14	21	20	20	21	21	20	12	10	13	13	13	12	14	14	15	15
sp|P02792|FRIL_HUMAN	sp|P02792|FRIL_HUMAN	3	3	3	sp|P02792|FRIL_HUMAN Ferritin light chain OS=Homo sapiens OX=9606 GN=FTL PE=1 SV=2	1	3	3	3	0	0	0	0	0	1	1	0	0	1	2	0	0	0	0	0	0	0	0	0	0	0	0	1	1	0	0	1	2	0	0	0	0	0	0	0	0	0	0	0
sp|P02794|FRIH_HUMAN	sp|P02794|FRIH_HUMAN	5	5	5	sp|P02794|FRIH_HUMAN Ferritin heavy chain OS=Homo sapiens OX=9606 GN=FTH1 PE=1 SV=2	1	5	5	5	1	1	1	1	1	0	2	3	3	2	2	2	0	0	0	0	0	0	1	1	1	1	1	0	2	3	3	2	2	2	0	0	0	0	0	0	1	1	1	1
sp|P03886|NU1M_HUMAN	sp|P03886|NU1M_HUMAN	1	1	1	sp|P03886|NU1M_HUMAN NADH-ubiquinone oxidoreductase chain 1 OS=Homo sapiens OX=9606 GN=MT-ND1 PE=1 SV=1	1	1	1	1	1	1	1	1	1	1	0	0	0	0	0	0	1	1	1	1	1	1	1	1	1	1	1	1	0	0	0	0	0	0	1	1	1	1	1	1	1	1	1	1
sp|P03897|NU3M_HUMAN	sp|P03897|NU3M_HUMAN	1	1	1	sp|P03897|NU3M_HUMAN NADH-ubiquinone oxidoreductase chain 3 OS=Homo sapiens OX=9606 GN=MT-ND3 PE=1 SV=1	1	1	1	1	1	1	1	1	1	1	0	0	0	0	0	0	0	0	0	1	0	0	1	1	1	1	1	1	0	0	0	0	0	0	0	0	0	1	0	0	1	1	1	1
sp|P03905|NU4M_HUMAN	sp|P03905|NU4M_HUMAN	3	3	3	sp|P03905|NU4M_HUMAN NADH-ubiquinone oxidoreductase chain 4 OS=Homo sapiens OX=9606 GN=MT-ND4 PE=1 SV=1	1	3	3	3	2	2	3	2	2	3	1	0	0	0	1	1	0	0	0	0	0	0	2	2	3	2	2	3	1	0	0	0	1	1	0	0	0	0	0	0	2	2	3	2
sp|P03915|NU5M_HUMAN	sp|P03915|NU5M_HUMAN	4	4	4	sp|P03915|NU5M_HUMAN NADH-ubiquinone oxidoreductase chain 5 OS=Homo sapiens OX=9606 GN=MT-ND5 PE=1 SV=2	1	4	4	4	4	3	2	3	2	2	1	1	0	0	0	0	1	2	2	2	2	1	4	3	2	3	2	2	1	1	0	0	0	0	1	2	2	2	2	1	4	3	2	3
sp|P03952|KLKB1_HUMAN	sp|P03952|KLKB1_HUMAN	6	6	6	sp|P03952|KLKB1_HUMAN Plasma kallikrein OS=Homo sapiens OX=9606 GN=KLKB1 PE=1 SV=1	1	6	6	6	2	1	1	1	1	1	2	3	3	3	4	3	1	1	1	1	1	1	2	1	1	1	1	1	2	3	3	3	4	3	1	1	1	1	1	1	2	1	1	1
sp|P03973|SLPI_HUMAN	sp|P03973|SLPI_HUMAN	1	1	1	sp|P03973|SLPI_HUMAN Antileukoproteinase OS=Homo sapiens OX=9606 GN=SLPI PE=1 SV=2	1	1	1	1	0	0	0	0	0	0	1	1	1	1	1	1	1	1	1	1	1	1	0	0	0	0	0	0	1	1	1	1	1	1	1	1	1	1	1	1	0	0	0	0
sp|P04003|C4BPA_HUMAN	sp|P04003|C4BPA_HUMAN	22	22	22	sp|P04003|C4BPA_HUMAN C4b-binding protein alpha chain OS=Homo sapiens OX=9606 GN=C4BPA PE=1 SV=2	1	22	22	22	15	17	13	16	15	14	11	11	13	10	10	11	18	17	17	17	21	17	15	17	13	16	15	14	11	11	13	10	10	11	18	17	17	17	21	17	15	17	13	16
sp|P04004|VTNC_HUMAN;CON__Q3ZBS7	sp|P04004|VTNC_HUMAN	11;1	11;1	11;1	sp|P04004|VTNC_HUMAN Vitronectin OS=Homo sapiens OX=9606 GN=VTN PE=1 SV=1	2	11	11	11	8	10	7	7	9	8	8	8	7	7	7	7	9	10	9	10	8	10	8	10	7	7	9	8	8	8	7	7	7	7	9	10	9	10	8	10	8	10	7	7
sp|P04040|CATA_HUMAN	sp|P04040|CATA_HUMAN	26	26	26	sp|P04040|CATA_HUMAN Catalase OS=Homo sapiens OX=9606 GN=CAT PE=1 SV=3	1	26	26	26	18	17	18	19	19	19	14	17	16	13	15	15	19	20	20	15	19	20	18	17	18	19	19	19	14	17	16	13	15	15	19	20	20	15	19	20	18	17	18	19
sp|P04062|GLCM_HUMAN	sp|P04062|GLCM_HUMAN	3	3	3	sp|P04062|GLCM_HUMAN Lysosomal acid glucosylceramidase OS=Homo sapiens OX=9606 GN=GBA PE=1 SV=3	1	3	3	3	2	2	3	2	2	2	0	0	1	0	0	0	0	0	1	0	1	0	2	2	3	2	2	2	0	0	1	0	0	0	0	0	1	0	1	0	2	2	3	2
sp|P04066|FUCO_HUMAN	sp|P04066|FUCO_HUMAN	3	3	3	sp|P04066|FUCO_HUMAN Tissue alpha-L-fucosidase OS=Homo sapiens OX=9606 GN=FUCA1 PE=1 SV=4	1	3	3	3	0	0	0	0	2	1	1	1	0	1	0	1	0	1	1	0	1	0	0	0	0	0	2	1	1	1	0	1	0	1	0	1	1	0	1	0	0	0	0	0
sp|P04075|ALDOA_HUMAN	sp|P04075|ALDOA_HUMAN	26	26	21	sp|P04075|ALDOA_HUMAN Fructose-bisphosphate aldolase A OS=Homo sapiens OX=9606 GN=ALDOA PE=1 SV=2	1	26	26	21	20	16	17	19	18	20	17	19	19	19	19	19	23	23	22	23	22	21	20	16	17	19	18	20	17	19	19	19	19	19	23	23	22	23	22	21	16	15	15	15
sp|P04080|CYTB_HUMAN	sp|P04080|CYTB_HUMAN	6	6	6	sp|P04080|CYTB_HUMAN Cystatin-B OS=Homo sapiens OX=9606 GN=CSTB PE=1 SV=2	1	6	6	6	5	5	5	5	5	5	5	5	5	5	5	5	5	5	5	6	5	5	5	5	5	5	5	5	5	5	5	5	5	5	5	5	5	6	5	5	5	5	5	5
sp|P04083|ANXA1_HUMAN	sp|P04083|ANXA1_HUMAN	28	28	28	sp|P04083|ANXA1_HUMAN Annexin A1 OS=Homo sapiens OX=9606 GN=ANXA1 PE=1 SV=2	1	28	28	28	22	23	23	23	24	22	23	23	23	24	21	23	27	25	26	27	25	24	22	23	23	23	24	22	23	23	23	24	21	23	27	25	26	27	25	24	22	23	23	23
sp|P04114|APOB_HUMAN;CON__ENSEMBL:ENSBTAP00000032840	sp|P04114|APOB_HUMAN	108;2	108;2	108;2	sp|P04114|APOB_HUMAN Apolipoprotein B-100 OS=Homo sapiens OX=9606 GN=APOB PE=1 SV=2	2	108	108	108	62	65	67	63	58	58	35	34	33	38	34	36	46	51	45	47	47	54	62	65	67	63	58	58	35	34	33	38	34	36	46	51	45	47	47	54	62	65	67	63
sp|P04156|PRIO_HUMAN	sp|P04156|PRIO_HUMAN	3	3	3	sp|P04156|PRIO_HUMAN Major prion protein OS=Homo sapiens OX=9606 GN=PRNP PE=1 SV=1	1	3	3	3	0	0	0	0	0	0	2	1	1	0	1	0	0	2	0	1	1	0	0	0	0	0	0	0	2	1	1	0	1	0	0	2	0	1	1	0	0	0	0	0
sp|P04179|SODM_HUMAN	sp|P04179|SODM_HUMAN	11	11	11	sp|P04179|SODM_HUMAN Superoxide dismutase [Mn], mitochondrial OS=Homo sapiens OX=9606 GN=SOD2 PE=1 SV=3	1	11	11	11	3	6	5	5	4	6	7	9	8	7	9	8	6	6	6	5	4	7	3	6	5	5	4	6	7	9	8	7	9	8	6	6	6	5	4	7	3	6	5	5
sp|P04181|OAT_HUMAN	sp|P04181|OAT_HUMAN	8	8	8	sp|P04181|OAT_HUMAN Ornithine aminotransferase, mitochondrial OS=Homo sapiens OX=9606 GN=OAT PE=1 SV=1	1	8	8	8	1	2	4	4	3	4	1	1	2	1	1	1	3	3	2	3	3	3	1	2	4	4	3	4	1	1	2	1	1	1	3	3	2	3	3	3	1	2	4	4
sp|P04183|KITH_HUMAN	sp|P04183|KITH_HUMAN	3	3	3	sp|P04183|KITH_HUMAN Thymidine kinase, cytosolic OS=Homo sapiens OX=9606 GN=TK1 PE=1 SV=2	1	3	3	3	0	0	0	0	0	0	0	0	0	0	0	0	1	3	1	1	1	1	0	0	0	0	0	0	0	0	0	0	0	0	1	3	1	1	1	1	0	0	0	0
sp|P04196|HRG_HUMAN	sp|P04196|HRG_HUMAN	15	15	15	sp|P04196|HRG_HUMAN Histidine-rich glycoprotein OS=Homo sapiens OX=9606 GN=HRG PE=1 SV=1	1	15	15	15	8	9	8	9	8	10	14	12	14	13	14	14	4	5	5	6	5	5	8	9	8	9	8	10	14	12	14	13	14	14	4	5	5	6	5	5	8	9	8	9
sp|P04211|LV743_HUMAN;sp|A0A075B6I9|LV746_HUMAN	sp|P04211|LV743_HUMAN;sp|A0A075B6I9|LV746_HUMAN	2;2	2;2	2;2	sp|P04211|LV743_HUMAN Immunoglobulin lambda variable 7-43 OS=Homo sapiens OX=9606 GN=IGLV7-43 PE=3 SV=2;sp|A0A075B6I9|LV746_HUMAN Immunoglobulin lambda variable 7-46 OS=Homo sapiens OX=9606 GN=IGLV7-46 PE=3 SV=4	2	2	2	2	0	0	0	0	0	0	1	2	2	1	2	1	0	0	0	0	0	0	0	0	0	0	0	0	1	2	2	1	2	1	0	0	0	0	0	0	0	0	0	0
sp|P04216|THY1_HUMAN	sp|P04216|THY1_HUMAN	3	3	3	sp|P04216|THY1_HUMAN Thy-1 membrane glycoprotein OS=Homo sapiens OX=9606 GN=THY1 PE=1 SV=2	1	3	3	3	1	2	1	1	1	1	2	2	2	2	2	2	1	2	2	2	2	2	1	2	1	1	1	1	2	2	2	2	2	2	1	2	2	2	2	2	1	2	1	1
sp|P04217|A1BG_HUMAN;CON__Q2KJF1	sp|P04217|A1BG_HUMAN	13;1	13;1	13;1	sp|P04217|A1BG_HUMAN Alpha-1B-glycoprotein OS=Homo sapiens OX=9606 GN=A1BG PE=1 SV=4	2	13	13	13	8	10	9	9	8	9	13	13	13	12	13	12	7	9	8	8	6	8	8	10	9	9	8	9	13	13	13	12	13	12	7	9	8	8	6	8	8	10	9	9
sp|P04233|HG2A_HUMAN	sp|P04233|HG2A_HUMAN	4	4	4	sp|P04233|HG2A_HUMAN HLA class II histocompatibility antigen gamma chain OS=Homo sapiens OX=9606 GN=CD74 PE=1 SV=3	1	4	4	4	2	3	3	2	3	2	2	2	1	1	2	2	1	1	2	1	2	1	2	3	3	2	3	2	2	2	1	1	2	2	1	1	2	1	2	1	2	3	3	2
sp|P04259|K2C6B_HUMAN	sp|P04259|K2C6B_HUMAN	52	3	2	sp|P04259|K2C6B_HUMAN Keratin, type II cytoskeletal 6B OS=Homo sapiens OX=9606 GN=KRT6B PE=1 SV=5	1	52	3	2	29	30	28	29	26	28	35	41	42	37	43	39	48	48	46	47	47	49	1	0	0	1	0	1	1	2	2	2	2	2	2	2	2	2	2	3	0	0	0	0
sp|P04264|K2C1_HUMAN;CON__P04264	sp|P04264|K2C1_HUMAN;CON__P04264	34;33	26;25	21;20	sp|P04264|K2C1_HUMAN Keratin, type II cytoskeletal 1 OS=Homo sapiens OX=9606 GN=KRT1 PE=1 SV=6;	2	34	26	21	25	28	25	25	27	25	29	31	30	29	30	28	13	15	17	15	17	18	21	23	21	20	23	20	24	24	24	24	24	24	9	11	13	11	13	13	16	18	17	16
sp|P04271|S100B_HUMAN	sp|P04271|S100B_HUMAN	1	1	1	sp|P04271|S100B_HUMAN Protein S100-B OS=Homo sapiens OX=9606 GN=S100B PE=1 SV=2	1	1	1	1	0	0	0	0	0	0	1	1	1	1	1	1	0	0	0	0	0	0	0	0	0	0	0	0	1	1	1	1	1	1	0	0	0	0	0	0	0	0	0	0
sp|P04275|VWF_HUMAN	sp|P04275|VWF_HUMAN	30	30	30	sp|P04275|VWF_HUMAN von Willebrand factor OS=Homo sapiens OX=9606 GN=VWF PE=1 SV=4	1	30	30	30	6	5	4	5	4	4	15	14	12	13	17	20	3	2	2	2	2	3	6	5	4	5	4	4	15	14	12	13	17	20	3	2	2	2	2	3	6	5	4	5
sp|P04278|SHBG_HUMAN	sp|P04278|SHBG_HUMAN	2	2	2	sp|P04278|SHBG_HUMAN Sex hormone-binding globulin OS=Homo sapiens OX=9606 GN=SHBG PE=1 SV=2	1	2	2	2	0	0	0	0	0	0	1	0	1	0	0	1	0	0	0	0	0	0	0	0	0	0	0	0	1	0	1	0	0	1	0	0	0	0	0	0	0	0	0	0
sp|P04406|G3P_HUMAN;sp|O14556|G3PT_HUMAN	sp|P04406|G3P_HUMAN	17;1	17;1	17;1	sp|P04406|G3P_HUMAN Glyceraldehyde-3-phosphate dehydrogenase OS=Homo sapiens OX=9606 GN=GAPDH PE=1 SV=3	2	17	17	17	17	15	16	15	16	15	15	15	15	15	14	14	14	14	14	14	14	15	17	15	16	15	16	15	15	15	15	15	14	14	14	14	14	14	14	15	17	15	16	15
sp|P04424|ARLY_HUMAN	sp|P04424|ARLY_HUMAN	3	3	3	sp|P04424|ARLY_HUMAN Argininosuccinate lyase OS=Homo sapiens OX=9606 GN=ASL PE=1 SV=4	1	3	3	3	2	2	1	0	1	1	0	1	1	0	0	0	0	1	0	0	0	0	2	2	1	0	1	1	0	1	1	0	0	0	0	1	0	0	0	0	2	2	1	0
sp|P04430|KV116_HUMAN	sp|P04430|KV116_HUMAN	1	1	1	sp|P04430|KV116_HUMAN Immunoglobulin kappa variable 1-16 OS=Homo sapiens OX=9606 GN=IGKV1-16 PE=1 SV=2	1	1	1	1	0	0	0	0	1	0	1	1	1	1	1	1	0	0	0	0	0	0	0	0	0	0	1	0	1	1	1	1	1	1	0	0	0	0	0	0	0	0	0	0
sp|P04432|KVD39_HUMAN;sp|P01611|KVD12_HUMAN;sp|P01597|KV139_HUMAN;sp|A0A0C4DH73|KV112_HUMAN;sp|A0A0C4DH72|KV106_HUMAN	sp|P04432|KVD39_HUMAN;sp|P01611|KVD12_HUMAN;sp|P01597|KV139_HUMAN;sp|A0A0C4DH73|KV112_HUMAN;sp|A0A0C4DH72|KV106_HUMAN	1;1;1;1;1	1;1;1;1;1	1;1;1;1;1	sp|P04432|KVD39_HUMAN Immunoglobulin kappa variable 1D-39 OS=Homo sapiens OX=9606 GN=IGKV1D-39 PE=3 SV=2;sp|P01611|KVD12_HUMAN Immunoglobulin kappa variable 1D-12 OS=Homo sapiens OX=9606 GN=IGKV1D-12 PE=1 SV=2;sp|P01597|KV139_HUMAN Immunoglobulin kappa var	5	1	1	1	1	1	1	1	1	1	1	1	1	1	1	1	1	1	1	1	0	0	1	1	1	1	1	1	1	1	1	1	1	1	1	1	1	1	0	0	1	1	1	1
sp|P04433|KV311_HUMAN;sp|A0A0A0MRZ8|KVD11_HUMAN	sp|P04433|KV311_HUMAN;sp|A0A0A0MRZ8|KVD11_HUMAN	2;2	2;2	2;2	sp|P04433|KV311_HUMAN Immunoglobulin kappa variable 3-11 OS=Homo sapiens OX=9606 GN=IGKV3-11 PE=1 SV=1;sp|A0A0A0MRZ8|KVD11_HUMAN Immunoglobulin kappa variable 3D-11 OS=Homo sapiens OX=9606 GN=IGKV3D-11 PE=3 SV=6	2	2	2	2	1	1	1	1	1	1	1	1	1	2	1	1	1	1	1	1	1	1	1	1	1	1	1	1	1	1	1	2	1	1	1	1	1	1	1	1	1	1	1	1
sp|P04439|HLAA_HUMAN;sp|P30511|HLAF_HUMAN	sp|P04439|HLAA_HUMAN	13;1	13;1	7;0	sp|P04439|HLAA_HUMAN HLA class I histocompatibility antigen, A alpha chain OS=Homo sapiens OX=9606 GN=HLA-A PE=1 SV=2	2	13	13	7	7	4	6	5	6	6	2	3	4	1	3	5	12	9	10	10	10	11	7	4	6	5	6	6	2	3	4	1	3	5	12	9	10	10	10	11	3	2	2	2
sp|P04440|DPB1_HUMAN	sp|P04440|DPB1_HUMAN	2	1	1	sp|P04440|DPB1_HUMAN HLA class II histocompatibility antigen, DP beta 1 chain OS=Homo sapiens OX=9606 GN=HLA-DPB1 PE=1 SV=1	1	2	1	1	0	0	1	0	0	0	0	0	0	0	0	0	1	1	1	1	0	0	0	0	1	0	0	0	0	0	0	0	0	0	0	0	0	0	0	0	0	0	1	0
sp|P04632|CPNS1_HUMAN	sp|P04632|CPNS1_HUMAN	11	11	9	sp|P04632|CPNS1_HUMAN Calpain small subunit 1 OS=Homo sapiens OX=9606 GN=CAPNS1 PE=1 SV=1	1	11	11	9	3	4	4	4	3	4	7	7	6	7	6	8	7	8	9	6	10	7	3	4	4	4	3	4	7	7	6	7	6	8	7	8	9	6	10	7	3	4	4	4
sp|P04792|HSPB1_HUMAN	sp|P04792|HSPB1_HUMAN	16	16	16	sp|P04792|HSPB1_HUMAN Heat shock protein beta-1 OS=Homo sapiens OX=9606 GN=HSPB1 PE=1 SV=2	1	16	16	16	16	15	16	16	16	15	14	14	14	14	14	15	16	15	16	16	16	16	16	15	16	16	16	15	14	14	14	14	14	15	16	15	16	16	16	16	16	15	16	16
sp|P04839|CY24B_HUMAN;sp|Q9Y5S8|NOX1_HUMAN	sp|P04839|CY24B_HUMAN	3;1	3;1	3;1	sp|P04839|CY24B_HUMAN Cytochrome b-245 heavy chain OS=Homo sapiens OX=9606 GN=CYBB PE=1 SV=2	2	3	3	3	1	1	1	0	1	1	1	1	1	1	1	1	2	2	2	3	1	1	1	1	1	0	1	1	1	1	1	1	1	1	2	2	2	3	1	1	1	1	1	0
sp|P04843|RPN1_HUMAN	sp|P04843|RPN1_HUMAN	31	31	31	sp|P04843|RPN1_HUMAN Dolichyl-diphosphooligosaccharide--protein glycosyltransferase subunit 1 OS=Homo sapiens OX=9606 GN=RPN1 PE=1 SV=1	1	31	31	31	24	22	24	24	22	23	10	10	7	9	7	8	18	19	19	18	18	21	24	22	24	24	22	23	10	10	7	9	7	8	18	19	19	18	18	21	24	22	24	24
sp|P04844|RPN2_HUMAN	sp|P04844|RPN2_HUMAN	20	20	20	sp|P04844|RPN2_HUMAN Dolichyl-diphosphooligosaccharide--protein glycosyltransferase subunit 2 OS=Homo sapiens OX=9606 GN=RPN2 PE=1 SV=3	1	20	20	20	20	18	19	19	19	18	6	4	7	3	6	4	13	14	13	13	15	14	20	18	19	19	19	18	6	4	7	3	6	4	13	14	13	13	15	14	20	18	19	19
sp|P04899|GNAI2_HUMAN;sp|P09471|GNAO_HUMAN;sp|P11488|GNAT1_HUMAN;sp|P19087|GNAT2_HUMAN	sp|P04899|GNAI2_HUMAN	14;2;1;1	14;2;1;1	9;0;0;0	sp|P04899|GNAI2_HUMAN Guanine nucleotide-binding protein G(i) subunit alpha-2 OS=Homo sapiens OX=9606 GN=GNAI2 PE=1 SV=3	4	14	14	9	11	10	11	10	12	9	8	7	8	5	8	6	9	10	9	9	9	9	11	10	11	10	12	9	8	7	8	5	8	6	9	10	9	9	9	9	6	6	6	6
sp|P04920|B3A2_HUMAN	sp|P04920|B3A2_HUMAN	2	2	2	sp|P04920|B3A2_HUMAN Anion exchange protein 2 OS=Homo sapiens OX=9606 GN=SLC4A2 PE=1 SV=4	1	2	2	2	0	0	0	0	2	0	0	0	0	0	0	0	0	0	0	0	0	0	0	0	0	0	2	0	0	0	0	0	0	0	0	0	0	0	0	0	0	0	0	0
sp|P05023|AT1A1_HUMAN;sp|P13637|AT1A3_HUMAN;sp|P50993|AT1A2_HUMAN;sp|Q13733|AT1A4_HUMAN;sp|P20648|ATP4A_HUMAN	sp|P05023|AT1A1_HUMAN	36;14;12;6;3	36;14;12;6;3	33;11;9;3;1	sp|P05023|AT1A1_HUMAN Sodium/potassium-transporting ATPase subunit alpha-1 OS=Homo sapiens OX=9606 GN=ATP1A1 PE=1 SV=1	5	36	36	33	20	20	21	21	21	23	5	8	8	7	8	5	22	22	20	21	23	22	20	20	21	21	21	23	5	8	8	7	8	5	22	22	20	21	23	22	19	19	21	20
sp|P05026|AT1B1_HUMAN	sp|P05026|AT1B1_HUMAN	4	4	4	sp|P05026|AT1B1_HUMAN Sodium/potassium-transporting ATPase subunit beta-1 OS=Homo sapiens OX=9606 GN=ATP1B1 PE=1 SV=1	1	4	4	4	2	2	2	2	3	2	1	1	1	1	1	1	2	3	2	2	2	2	2	2	2	2	3	2	1	1	1	1	1	1	2	3	2	2	2	2	2	2	2	2
sp|P05067|A4_HUMAN	sp|P05067|A4_HUMAN	3	3	3	sp|P05067|A4_HUMAN Amyloid-beta precursor protein OS=Homo sapiens OX=9606 GN=APP PE=1 SV=3	1	3	3	3	1	1	2	0	1	0	0	0	0	0	0	0	0	0	0	0	0	0	1	1	2	0	1	0	0	0	0	0	0	0	0	0	0	0	0	0	1	1	2	0
sp|P05090|APOD_HUMAN	sp|P05090|APOD_HUMAN	7	7	7	sp|P05090|APOD_HUMAN Apolipoprotein D OS=Homo sapiens OX=9606 GN=APOD PE=1 SV=1	1	7	7	7	5	5	5	5	6	5	6	6	6	6	6	6	4	4	3	4	4	3	5	5	5	5	6	5	6	6	6	6	6	6	4	4	3	4	4	3	5	5	5	5
sp|P05091|ALDH2_HUMAN	sp|P05091|ALDH2_HUMAN	21	18	18	sp|P05091|ALDH2_HUMAN Aldehyde dehydrogenase, mitochondrial OS=Homo sapiens OX=9606 GN=ALDH2 PE=1 SV=2	1	21	18	18	12	12	10	11	10	12	8	12	9	11	8	10	6	5	5	7	7	7	11	11	9	10	9	11	6	9	7	9	6	7	6	5	5	7	6	7	11	11	9	10
sp|P05106|ITB3_HUMAN	sp|P05106|ITB3_HUMAN	7	7	7	sp|P05106|ITB3_HUMAN Integrin beta-3 OS=Homo sapiens OX=9606 GN=ITGB3 PE=1 SV=2	1	7	7	7	6	5	6	6	6	5	1	0	1	0	0	0	6	5	5	2	5	4	6	5	6	6	6	5	1	0	1	0	0	0	6	5	5	2	5	4	6	5	6	6
sp|P05107|ITB2_HUMAN	sp|P05107|ITB2_HUMAN	9	9	9	sp|P05107|ITB2_HUMAN Integrin beta-2 OS=Homo sapiens OX=9606 GN=ITGB2 PE=1 SV=2	1	9	9	9	4	6	5	4	3	5	0	0	1	0	0	0	4	5	2	3	4	5	4	6	5	4	3	5	0	0	1	0	0	0	4	5	2	3	4	5	4	6	5	4
sp|P05109|S10A8_HUMAN	sp|P05109|S10A8_HUMAN	7	7	7	sp|P05109|S10A8_HUMAN Protein S100-A8 OS=Homo sapiens OX=9606 GN=S100A8 PE=1 SV=1	1	7	7	7	6	5	5	4	5	3	3	3	3	3	3	4	2	3	3	2	2	2	6	5	5	4	5	3	3	3	3	3	3	4	2	3	3	2	2	2	6	5	5	4
sp|P05141|ADT2_HUMAN;sp|Q9H0C2|ADT4_HUMAN	sp|P05141|ADT2_HUMAN	14;3	6;0	5;0	sp|P05141|ADT2_HUMAN ADP/ATP translocase 2 OS=Homo sapiens OX=9606 GN=SLC25A5 PE=1 SV=7	2	14	6	5	10	8	10	9	9	9	10	9	10	8	11	9	8	7	9	9	9	10	4	2	4	2	4	3	3	3	4	3	5	3	4	4	5	4	4	5	4	2	3	2
sp|P05155|IC1_HUMAN;CON__P50448	sp|P05155|IC1_HUMAN	13;1	13;1	13;1	sp|P05155|IC1_HUMAN Plasma protease C1 inhibitor OS=Homo sapiens OX=9606 GN=SERPING1 PE=1 SV=2	2	13	13	13	9	10	7	8	9	6	12	10	12	10	10	11	4	7	3	6	6	5	9	10	7	8	9	6	12	10	12	10	10	11	4	7	3	6	6	5	9	10	7	8
sp|P05156|CFAI_HUMAN;CON__Q32PI4	sp|P05156|CFAI_HUMAN	13;1	13;1	13;1	sp|P05156|CFAI_HUMAN Complement factor I OS=Homo sapiens OX=9606 GN=CFI PE=1 SV=2	2	13	13	13	5	3	5	5	3	3	7	7	7	9	8	8	2	3	2	2	2	2	5	3	5	5	3	3	7	7	7	9	8	8	2	3	2	2	2	2	5	3	5	5
sp|P05160|F13B_HUMAN	sp|P05160|F13B_HUMAN	4	4	4	sp|P05160|F13B_HUMAN Coagulation factor XIII B chain OS=Homo sapiens OX=9606 GN=F13B PE=1 SV=3	1	4	4	4	0	0	0	0	1	0	1	1	2	2	1	1	0	1	1	0	0	0	0	0	0	0	1	0	1	1	2	2	1	1	0	1	1	0	0	0	0	0	0	0
sp|P05161|ISG15_HUMAN	sp|P05161|ISG15_HUMAN	7	7	7	sp|P05161|ISG15_HUMAN Ubiquitin-like protein ISG15 OS=Homo sapiens OX=9606 GN=ISG15 PE=1 SV=5	1	7	7	7	2	3	3	2	2	2	1	1	1	1	1	1	5	5	7	5	5	5	2	3	3	2	2	2	1	1	1	1	1	1	5	5	7	5	5	5	2	3	3	2
sp|P05164|PERM_HUMAN	sp|P05164|PERM_HUMAN	13	13	11	sp|P05164|PERM_HUMAN Myeloperoxidase OS=Homo sapiens OX=9606 GN=MPO PE=1 SV=1	1	13	13	11	10	8	9	10	8	8	3	2	2	2	3	2	3	3	3	1	4	4	10	8	9	10	8	8	3	2	2	2	3	2	3	3	3	1	4	4	9	8	9	9
sp|P05165|PCCA_HUMAN	sp|P05165|PCCA_HUMAN	10	10	10	sp|P05165|PCCA_HUMAN Propionyl-CoA carboxylase alpha chain, mitochondrial OS=Homo sapiens OX=9606 GN=PCCA PE=1 SV=4	1	10	10	10	4	7	5	6	5	4	0	1	1	1	0	1	0	0	0	1	0	0	4	7	5	6	5	4	0	1	1	1	0	1	0	0	0	1	0	0	4	7	5	6
sp|P05166|PCCB_HUMAN	sp|P05166|PCCB_HUMAN	7	7	7	sp|P05166|PCCB_HUMAN Propionyl-CoA carboxylase beta chain, mitochondrial OS=Homo sapiens OX=9606 GN=PCCB PE=1 SV=3	1	7	7	7	5	6	5	4	4	5	1	1	1	1	1	1	1	2	3	2	3	1	5	6	5	4	4	5	1	1	1	1	1	1	1	2	3	2	3	1	5	6	5	4
sp|P05186|PPBT_HUMAN	sp|P05186|PPBT_HUMAN	6	6	6	sp|P05186|PPBT_HUMAN Alkaline phosphatase, tissue-nonspecific isozyme OS=Homo sapiens OX=9606 GN=ALPL PE=1 SV=4	1	6	6	6	5	5	5	5	5	6	0	0	0	0	0	0	0	0	0	0	0	0	5	5	5	5	5	6	0	0	0	0	0	0	0	0	0	0	0	0	5	5	5	5
sp|P05198|IF2A_HUMAN	sp|P05198|IF2A_HUMAN	11	11	11	sp|P05198|IF2A_HUMAN Eukaryotic translation initiation factor 2 subunit 1 OS=Homo sapiens OX=9606 GN=EIF2S1 PE=1 SV=3	1	11	11	11	7	6	7	6	7	7	3	4	3	3	3	3	9	8	9	7	8	8	7	6	7	6	7	7	3	4	3	3	3	3	9	8	9	7	8	8	7	6	7	6
sp|P05204|HMGN2_HUMAN;sp|Q15651|HMGN3_HUMAN	sp|P05204|HMGN2_HUMAN;sp|Q15651|HMGN3_HUMAN	1;1	1;1	1;1	sp|P05204|HMGN2_HUMAN Non-histone chromosomal protein HMG-17 OS=Homo sapiens OX=9606 GN=HMGN2 PE=1 SV=3;sp|Q15651|HMGN3_HUMAN High mobility group nucleosome-binding domain-containing protein 3 OS=Homo sapiens OX=9606 GN=HMGN3 PE=1 SV=2	2	1	1	1	0	1	0	0	1	1	1	1	1	1	1	1	1	1	1	1	0	1	0	1	0	0	1	1	1	1	1	1	1	1	1	1	1	1	0	1	0	1	0	0
sp|P05362|ICAM1_HUMAN	sp|P05362|ICAM1_HUMAN	6	6	6	sp|P05362|ICAM1_HUMAN Intercellular adhesion molecule 1 OS=Homo sapiens OX=9606 GN=ICAM1 PE=1 SV=2	1	6	6	6	0	1	0	1	1	2	0	0	0	0	0	0	4	2	4	5	4	2	0	1	0	1	1	2	0	0	0	0	0	0	4	2	4	5	4	2	0	1	0	1
sp|P05386|RLA1_HUMAN	sp|P05386|RLA1_HUMAN	3	2	2	sp|P05386|RLA1_HUMAN 60S acidic ribosomal protein P1 OS=Homo sapiens OX=9606 GN=RPLP1 PE=1 SV=1	1	3	2	2	3	3	3	3	3	3	2	2	1	2	2	2	3	3	3	3	3	3	2	2	2	2	2	2	1	1	1	1	1	1	2	2	2	2	2	2	2	2	2	2
sp|P05387|RLA2_HUMAN	sp|P05387|RLA2_HUMAN	10	10	9	sp|P05387|RLA2_HUMAN 60S acidic ribosomal protein P2 OS=Homo sapiens OX=9606 GN=RPLP2 PE=1 SV=1	1	10	10	9	7	8	8	7	9	8	7	6	5	5	5	5	8	7	7	7	7	7	7	8	8	7	9	8	7	6	5	5	5	5	8	7	7	7	7	7	6	7	7	6
sp|P05388|RLA0_HUMAN;sp|Q8NHW5|RLA0L_HUMAN	sp|P05388|RLA0_HUMAN;sp|Q8NHW5|RLA0L_HUMAN	12;8	12;8	12;8	sp|P05388|RLA0_HUMAN 60S acidic ribosomal protein P0 OS=Homo sapiens OX=9606 GN=RPLP0 PE=1 SV=1;sp|Q8NHW5|RLA0L_HUMAN 60S acidic ribosomal protein P0-like OS=Homo sapiens OX=9606 GN=RPLP0P6 PE=5 SV=1	2	12	12	12	10	10	11	10	10	8	9	9	8	8	9	9	10	9	9	11	8	9	10	10	11	10	10	8	9	9	8	8	9	9	10	9	9	11	8	9	10	10	11	10
sp|P05413|FABPH_HUMAN	sp|P05413|FABPH_HUMAN	7	7	7	sp|P05413|FABPH_HUMAN Fatty acid-binding protein, heart OS=Homo sapiens OX=9606 GN=FABP3 PE=1 SV=4	1	7	7	7	6	7	5	5	7	6	6	5	6	4	6	4	1	1	1	1	1	1	6	7	5	5	7	6	6	5	6	4	6	4	1	1	1	1	1	1	6	7	5	5
sp|P05452|TETN_HUMAN;CON__Q2KIS7	sp|P05452|TETN_HUMAN	7;3	7;3	7;3	sp|P05452|TETN_HUMAN Tetranectin OS=Homo sapiens OX=9606 GN=CLEC3B PE=1 SV=3	2	7	7	7	1	1	1	1	1	1	5	5	5	4	5	4	1	0	1	0	0	1	1	1	1	1	1	1	5	5	5	4	5	4	1	0	1	0	0	1	1	1	1	1
sp|P05455|LA_HUMAN	sp|P05455|LA_HUMAN	17	17	17	sp|P05455|LA_HUMAN Lupus La protein OS=Homo sapiens OX=9606 GN=SSB PE=1 SV=2	1	17	17	17	11	13	12	11	12	12	4	5	5	2	4	5	9	11	13	12	12	11	11	13	12	11	12	12	4	5	5	2	4	5	9	11	13	12	12	11	11	13	12	11
sp|P05543|THBG_HUMAN;CON__Q9TT36	sp|P05543|THBG_HUMAN	10;3	10;3	10;3	sp|P05543|THBG_HUMAN Thyroxine-binding globulin OS=Homo sapiens OX=9606 GN=SERPINA7 PE=1 SV=2	2	10	10	10	0	0	0	1	1	2	4	7	4	6	8	6	1	0	1	3	2	1	0	0	0	1	1	2	4	7	4	6	8	6	1	0	1	3	2	1	0	0	0	1
sp|P05546|HEP2_HUMAN	sp|P05546|HEP2_HUMAN	9	9	9	sp|P05546|HEP2_HUMAN Heparin cofactor 2 OS=Homo sapiens OX=9606 GN=SERPIND1 PE=1 SV=3	1	9	9	9	3	2	2	2	3	2	7	6	7	6	7	7	4	1	2	2	3	2	3	2	2	2	3	2	7	6	7	6	7	7	4	1	2	2	3	2	3	2	2	2
sp|P05556|ITB1_HUMAN	sp|P05556|ITB1_HUMAN	21	21	21	sp|P05556|ITB1_HUMAN Integrin beta-1 OS=Homo sapiens OX=9606 GN=ITGB1 PE=1 SV=2	1	21	21	21	17	16	17	15	19	17	6	7	6	5	5	5	8	8	8	9	8	7	17	16	17	15	19	17	6	7	6	5	5	5	8	8	8	9	8	7	17	16	17	15
sp|P05783|K1C18_HUMAN;CON__H-INV:HIT000015463	sp|P05783|K1C18_HUMAN	31;2	29;2	22;2	sp|P05783|K1C18_HUMAN Keratin, type I cytoskeletal 18 OS=Homo sapiens OX=9606 GN=KRT18 PE=1 SV=2	2	31	29	22	25	23	23	26	26	25	6	7	7	7	6	5	8	9	8	6	10	8	23	21	21	24	24	24	5	7	6	6	6	5	7	7	6	5	9	7	17	16	16	18
sp|P05787|K2C8_HUMAN;CON__P05787;CON__Q9H552;CON__H-INV:HIT000016045;CON__REFSEQ:XP_092267	sp|P05787|K2C8_HUMAN;CON__P05787	38;38;12;5;2	28;28;8;2;2	14;14;3;2;1	sp|P05787|K2C8_HUMAN Keratin, type II cytoskeletal 8 OS=Homo sapiens OX=9606 GN=KRT8 PE=1 SV=7;	5	38	28	14	31	31	33	35	30	33	20	21	19	16	21	21	21	18	20	21	21	21	23	22	24	26	21	24	12	12	11	10	12	13	12	10	11	12	13	12	12	10	12	13
sp|P05976|MYL1_HUMAN;sp|P08590|MYL3_HUMAN	sp|P05976|MYL1_HUMAN;sp|P08590|MYL3_HUMAN	2;2	2;2	2;2	sp|P05976|MYL1_HUMAN Myosin light chain 1/3, skeletal muscle isoform OS=Homo sapiens OX=9606 GN=MYL1 PE=1 SV=3;sp|P08590|MYL3_HUMAN Myosin light chain 3 OS=Homo sapiens OX=9606 GN=MYL3 PE=1 SV=3	2	2	2	2	1	1	1	2	1	1	1	1	1	1	1	1	1	1	1	2	1	1	1	1	1	2	1	1	1	1	1	1	1	1	1	1	1	2	1	1	1	1	1	2
sp|P05997|CO5A2_HUMAN	sp|P05997|CO5A2_HUMAN	5	5	5	sp|P05997|CO5A2_HUMAN Collagen alpha-2(V) chain OS=Homo sapiens OX=9606 GN=COL5A2 PE=1 SV=3	1	5	5	5	1	1	1	1	1	1	2	4	4	2	4	4	0	0	0	0	1	1	1	1	1	1	1	1	2	4	4	2	4	4	0	0	0	0	1	1	1	1	1	1
sp|P06132|DCUP_HUMAN	sp|P06132|DCUP_HUMAN	4	4	4	sp|P06132|DCUP_HUMAN Uroporphyrinogen decarboxylase OS=Homo sapiens OX=9606 GN=UROD PE=1 SV=2	1	4	4	4	1	1	0	0	0	1	0	0	1	1	0	1	2	3	2	3	3	3	1	1	0	0	0	1	0	0	1	1	0	1	2	3	2	3	3	3	1	1	0	0
sp|P06276|CHLE_HUMAN	sp|P06276|CHLE_HUMAN	2	2	2	sp|P06276|CHLE_HUMAN Cholinesterase OS=Homo sapiens OX=9606 GN=BCHE PE=1 SV=1	1	2	2	2	0	0	0	0	0	0	0	0	1	1	0	0	0	1	1	0	1	0	0	0	0	0	0	0	0	0	1	1	0	0	0	1	1	0	1	0	0	0	0	0
sp|P06280|AGAL_HUMAN	sp|P06280|AGAL_HUMAN	4	4	4	sp|P06280|AGAL_HUMAN Alpha-galactosidase A OS=Homo sapiens OX=9606 GN=GLA PE=1 SV=1	1	4	4	4	3	3	3	2	3	2	1	1	1	1	1	0	3	3	3	2	3	1	3	3	3	2	3	2	1	1	1	1	1	0	3	3	3	2	3	1	3	3	3	2
sp|P06312|KV401_HUMAN	sp|P06312|KV401_HUMAN	4	4	4	sp|P06312|KV401_HUMAN Immunoglobulin kappa variable 4-1 OS=Homo sapiens OX=9606 GN=IGKV4-1 PE=1 SV=1	1	4	4	4	1	1	1	1	1	2	4	4	4	2	3	3	1	1	1	1	1	1	1	1	1	1	1	2	4	4	4	2	3	3	1	1	1	1	1	1	1	1	1	1
sp|P06396|GELS_HUMAN;REV__sp|Q6TDU7|DNAI7_HUMAN	sp|P06396|GELS_HUMAN	34;1	34;1	13;1	sp|P06396|GELS_HUMAN Gelsolin OS=Homo sapiens OX=9606 GN=GSN PE=1 SV=1	2	34	34	13	26	28	28	28	27	27	28	27	30	29	29	29	21	22	23	22	23	22	26	28	28	28	27	27	28	27	30	29	29	29	21	22	23	22	23	22	13	13	13	13
sp|P06401|PRGR_HUMAN	sp|P06401|PRGR_HUMAN	1	1	1	sp|P06401|PRGR_HUMAN Progesterone receptor OS=Homo sapiens OX=9606 GN=PGR PE=1 SV=4	1	1	1	1	0	0	0	0	0	0	1	1	1	1	1	0	0	0	0	0	0	0	0	0	0	0	0	0	1	1	1	1	1	0	0	0	0	0	0	0	0	0	0	0
sp|P06454|PTMA_HUMAN	sp|P06454|PTMA_HUMAN	5	5	5	sp|P06454|PTMA_HUMAN Prothymosin alpha OS=Homo sapiens OX=9606 GN=PTMA PE=1 SV=2	1	5	5	5	2	3	3	3	3	4	1	1	1	1	2	1	3	3	4	5	3	3	2	3	3	3	3	4	1	1	1	1	2	1	3	3	4	5	3	3	2	3	3	3
sp|P06493|CDK1_HUMAN	sp|P06493|CDK1_HUMAN	5	5	4	sp|P06493|CDK1_HUMAN Cyclin-dependent kinase 1 OS=Homo sapiens OX=9606 GN=CDK1 PE=1 SV=3	1	5	5	4	1	1	2	2	1	1	0	0	0	0	0	0	3	4	1	3	4	2	1	1	2	2	1	1	0	0	0	0	0	0	3	4	1	3	4	2	0	0	1	1
sp|P06576|ATPB_HUMAN	sp|P06576|ATPB_HUMAN	22	22	22	sp|P06576|ATPB_HUMAN ATP synthase subunit beta, mitochondrial OS=Homo sapiens OX=9606 GN=ATP5F1B PE=1 SV=3	1	22	22	22	20	20	20	21	20	20	17	18	18	17	17	18	22	22	21	21	20	21	20	20	20	21	20	20	17	18	18	17	17	18	22	22	21	21	20	21	20	20	20	21
sp|P06681|CO2_HUMAN	sp|P06681|CO2_HUMAN	12	12	12	sp|P06681|CO2_HUMAN Complement C2 OS=Homo sapiens OX=9606 GN=C2 PE=1 SV=2	1	12	12	12	0	0	0	0	0	0	6	5	5	7	8	6	2	2	2	1	1	2	0	0	0	0	0	0	6	5	5	7	8	6	2	2	2	1	1	2	0	0	0	0
sp|P06702|S10A9_HUMAN	sp|P06702|S10A9_HUMAN	6	6	6	sp|P06702|S10A9_HUMAN Protein S100-A9 OS=Homo sapiens OX=9606 GN=S100A9 PE=1 SV=1	1	6	6	6	5	5	5	5	5	6	4	5	6	6	6	5	5	5	5	4	5	4	5	5	5	5	5	6	4	5	6	6	6	5	5	5	5	4	5	4	5	5	5	5
sp|P06703|S10A6_HUMAN	sp|P06703|S10A6_HUMAN	5	5	5	sp|P06703|S10A6_HUMAN Protein S100-A6 OS=Homo sapiens OX=9606 GN=S100A6 PE=1 SV=1	1	5	5	5	4	5	5	4	5	5	3	3	3	3	4	4	4	4	4	4	4	4	4	5	5	4	5	5	3	3	3	3	4	4	4	4	4	4	4	4	4	5	5	4
sp|P06727|APOA4_HUMAN	sp|P06727|APOA4_HUMAN	23	23	21	sp|P06727|APOA4_HUMAN Apolipoprotein A-IV OS=Homo sapiens OX=9606 GN=APOA4 PE=1 SV=4	1	23	23	21	11	9	11	12	13	10	19	21	21	20	20	20	4	5	4	5	4	5	11	9	11	12	13	10	19	21	21	20	20	20	4	5	4	5	4	5	11	9	11	12
sp|P06730|IF4E_HUMAN	sp|P06730|IF4E_HUMAN	2	2	2	sp|P06730|IF4E_HUMAN Eukaryotic translation initiation factor 4E OS=Homo sapiens OX=9606 GN=EIF4E PE=1 SV=2	1	2	2	2	1	1	1	2	1	2	1	1	1	2	2	1	2	1	2	0	1	2	1	1	1	2	1	2	1	1	1	2	2	1	2	1	2	0	1	2	1	1	1	2
sp|P06733|ENOA_HUMAN;sp|P13929|ENOB_HUMAN	sp|P06733|ENOA_HUMAN	25;3	25;3	22;0	sp|P06733|ENOA_HUMAN Alpha-enolase OS=Homo sapiens OX=9606 GN=ENO1 PE=1 SV=2	2	25	25	22	20	19	20	21	21	21	19	18	19	19	19	21	21	21	23	22	22	23	20	19	20	21	21	21	19	18	19	19	19	21	21	21	23	22	22	23	17	16	17	18
sp|P06737|PYGL_HUMAN	sp|P06737|PYGL_HUMAN	27	27	21	sp|P06737|PYGL_HUMAN Glycogen phosphorylase, liver form OS=Homo sapiens OX=9606 GN=PYGL PE=1 SV=4	1	27	27	21	6	4	5	6	5	6	7	6	5	6	4	5	19	21	23	21	21	22	6	4	5	6	5	6	7	6	5	6	4	5	19	21	23	21	21	22	5	4	4	5
sp|P06744|G6PI_HUMAN;sp|Q8N196|SIX5_HUMAN	sp|P06744|G6PI_HUMAN	23;1	23;1	18;1	sp|P06744|G6PI_HUMAN Glucose-6-phosphate isomerase OS=Homo sapiens OX=9606 GN=GPI PE=1 SV=4	2	23	23	18	19	17	18	20	16	17	13	14	12	13	12	13	20	20	19	20	20	19	19	17	18	20	16	17	13	14	12	13	12	13	20	20	19	20	20	19	14	12	13	15
sp|P06748|NPM_HUMAN	sp|P06748|NPM_HUMAN	12	12	12	sp|P06748|NPM_HUMAN Nucleophosmin OS=Homo sapiens OX=9606 GN=NPM1 PE=1 SV=2	1	12	12	12	8	8	9	8	8	9	8	8	10	10	8	10	11	12	11	10	10	9	8	8	9	8	8	9	8	8	10	10	8	10	11	12	11	10	10	9	8	8	9	8
sp|P06753|TPM3_HUMAN	sp|P06753|TPM3_HUMAN	22	7	7	sp|P06753|TPM3_HUMAN Tropomyosin alpha-3 chain OS=Homo sapiens OX=9606 GN=TPM3 PE=1 SV=2	1	22	7	7	18	19	16	19	17	18	12	13	13	15	14	13	12	13	13	15	15	13	7	7	6	7	6	6	3	4	4	5	5	4	5	5	5	5	5	5	7	7	6	7
sp|P06756|ITAV_HUMAN	sp|P06756|ITAV_HUMAN	17	17	17	sp|P06756|ITAV_HUMAN Integrin alpha-V OS=Homo sapiens OX=9606 GN=ITGAV PE=1 SV=2	1	17	17	17	4	8	4	6	5	4	2	4	2	1	3	1	12	8	8	7	8	6	4	8	4	6	5	4	2	4	2	1	3	1	12	8	8	7	8	6	4	8	4	6
sp|P06865|HEXA_HUMAN	sp|P06865|HEXA_HUMAN	10	10	10	sp|P06865|HEXA_HUMAN Beta-hexosaminidase subunit alpha OS=Homo sapiens OX=9606 GN=HEXA PE=1 SV=2	1	10	10	10	5	5	4	3	5	4	2	1	2	2	3	3	3	4	3	2	2	2	5	5	4	3	5	4	2	1	2	2	3	3	3	4	3	2	2	2	5	5	4	3
sp|P07099|HYEP_HUMAN	sp|P07099|HYEP_HUMAN	20	20	20	sp|P07099|HYEP_HUMAN Epoxide hydrolase 1 OS=Homo sapiens OX=9606 GN=EPHX1 PE=1 SV=1	1	20	20	20	11	17	11	12	12	9	4	7	6	7	6	6	9	10	8	8	10	10	11	17	11	12	12	9	4	7	6	7	6	6	9	10	8	8	10	10	11	17	11	12
sp|P07108|ACBP_HUMAN	sp|P07108|ACBP_HUMAN	5	5	5	sp|P07108|ACBP_HUMAN Acyl-CoA-binding protein OS=Homo sapiens OX=9606 GN=DBI PE=1 SV=2	1	5	5	5	2	3	3	3	3	4	4	4	4	3	4	5	3	4	3	4	3	3	2	3	3	3	3	4	4	4	4	3	4	5	3	4	3	4	3	3	2	3	3	3
sp|P07195|LDHB_HUMAN;sp|Q6ZMR3|LDH6A_HUMAN	sp|P07195|LDHB_HUMAN	16;1	15;0	15;0	sp|P07195|LDHB_HUMAN L-lactate dehydrogenase B chain OS=Homo sapiens OX=9606 GN=LDHB PE=1 SV=2	2	16	15	15	14	15	14	14	14	14	11	12	12	12	13	13	15	15	15	15	14	14	13	14	13	13	13	13	11	12	12	12	12	13	14	14	14	14	13	13	13	14	13	13
sp|P07197|NFM_HUMAN	sp|P07197|NFM_HUMAN	2	1	1	sp|P07197|NFM_HUMAN Neurofilament medium polypeptide OS=Homo sapiens OX=9606 GN=NEFM PE=1 SV=3	1	2	1	1	1	1	1	1	1	1	1	2	2	1	1	1	1	1	1	1	1	1	0	0	0	0	0	0	0	1	1	0	0	0	0	0	0	0	0	0	0	0	0	0
sp|P07203|GPX1_HUMAN	sp|P07203|GPX1_HUMAN	10	10	10	sp|P07203|GPX1_HUMAN Glutathione peroxidase 1 OS=Homo sapiens OX=9606 GN=GPX1 PE=1 SV=4	1	10	10	10	3	3	3	3	4	3	4	7	5	5	5	8	4	2	3	3	4	3	3	3	3	3	4	3	4	7	5	5	5	8	4	2	3	3	4	3	3	3	3	3
sp|P07204|TRBM_HUMAN	sp|P07204|TRBM_HUMAN	2	2	2	sp|P07204|TRBM_HUMAN Thrombomodulin OS=Homo sapiens OX=9606 GN=THBD PE=1 SV=2	1	2	2	2	0	0	0	0	0	0	0	0	0	0	0	0	1	1	2	1	1	0	0	0	0	0	0	0	0	0	0	0	0	0	1	1	2	1	1	0	0	0	0	0
sp|P07225|PROS_HUMAN;CON__P07224	sp|P07225|PROS_HUMAN	12;1	12;1	12;1	sp|P07225|PROS_HUMAN Vitamin K-dependent protein S OS=Homo sapiens OX=9606 GN=PROS1 PE=1 SV=1	2	12	12	12	3	2	0	3	1	2	3	5	4	3	2	3	6	6	4	5	9	7	3	2	0	3	1	2	3	5	4	3	2	3	6	6	4	5	9	7	3	2	0	3
sp|P07237|PDIA1_HUMAN	sp|P07237|PDIA1_HUMAN	30	30	30	sp|P07237|PDIA1_HUMAN Protein disulfide-isomerase OS=Homo sapiens OX=9606 GN=P4HB PE=1 SV=3	1	30	30	30	24	27	25	26	25	26	20	20	26	18	19	20	25	25	25	23	23	23	24	27	25	26	25	26	20	20	26	18	19	20	25	25	25	23	23	23	24	27	25	26
sp|P07305|H10_HUMAN	sp|P07305|H10_HUMAN	6	6	6	sp|P07305|H10_HUMAN Histone H1.0 OS=Homo sapiens OX=9606 GN=H1-0 PE=1 SV=3	1	6	6	6	4	2	1	2	3	2	4	5	5	6	5	6	0	0	0	1	1	1	4	2	1	2	3	2	4	5	5	6	5	6	0	0	0	1	1	1	4	2	1	2
sp|P07311|ACYP1_HUMAN	sp|P07311|ACYP1_HUMAN	2	2	2	sp|P07311|ACYP1_HUMAN Acylphosphatase-1 OS=Homo sapiens OX=9606 GN=ACYP1 PE=1 SV=2	1	2	2	2	0	0	0	0	0	0	0	1	1	0	2	0	0	0	0	0	0	0	0	0	0	0	0	0	0	1	1	0	2	0	0	0	0	0	0	0	0	0	0	0
sp|P07327|ADH1A_HUMAN	sp|P07327|ADH1A_HUMAN	4	1	0	sp|P07327|ADH1A_HUMAN Alcohol dehydrogenase 1A OS=Homo sapiens OX=9606 GN=ADH1A PE=1 SV=2	1	4	1	0	1	0	1	0	0	0	1	1	1	1	2	1	1	1	1	1	1	2	0	0	0	0	0	0	0	0	0	0	0	0	1	1	1	1	1	1	0	0	0	0
sp|P07339|CATD_HUMAN	sp|P07339|CATD_HUMAN	15	15	15	sp|P07339|CATD_HUMAN Cathepsin D OS=Homo sapiens OX=9606 GN=CTSD PE=1 SV=1	1	15	15	15	11	11	11	9	10	11	10	12	10	12	12	11	11	10	11	12	11	11	11	11	11	9	10	11	10	12	10	12	12	11	11	10	11	12	11	11	11	11	11	9
sp|P07355|ANXA2_HUMAN;sp|A6NMY6|AXA2L_HUMAN	sp|P07355|ANXA2_HUMAN;sp|A6NMY6|AXA2L_HUMAN	31;22	31;22	31;22	sp|P07355|ANXA2_HUMAN Annexin A2 OS=Homo sapiens OX=9606 GN=ANXA2 PE=1 SV=2;sp|A6NMY6|AXA2L_HUMAN Putative annexin A2-like protein OS=Homo sapiens OX=9606 GN=ANXA2P2 PE=5 SV=2	2	31	31	31	25	25	27	27	26	25	27	25	27	25	25	26	24	26	24	24	23	26	25	25	27	27	26	25	27	25	27	25	25	26	24	26	24	24	23	26	25	25	27	27
sp|P07357|CO8A_HUMAN	sp|P07357|CO8A_HUMAN	10	10	10	sp|P07357|CO8A_HUMAN Complement component C8 alpha chain OS=Homo sapiens OX=9606 GN=C8A PE=1 SV=2	1	10	10	10	3	2	3	2	1	1	6	5	7	5	6	5	4	5	4	4	5	5	3	2	3	2	1	1	6	5	7	5	6	5	4	5	4	4	5	5	3	2	3	2
sp|P07358|CO8B_HUMAN	sp|P07358|CO8B_HUMAN	10	10	10	sp|P07358|CO8B_HUMAN Complement component C8 beta chain OS=Homo sapiens OX=9606 GN=C8B PE=1 SV=3	1	10	10	10	1	1	1	1	1	3	5	5	5	5	6	5	4	4	4	3	3	4	1	1	1	1	1	3	5	5	5	5	6	5	4	4	4	3	3	4	1	1	1	1
sp|P07360|CO8G_HUMAN	sp|P07360|CO8G_HUMAN	7	7	7	sp|P07360|CO8G_HUMAN Complement component C8 gamma chain OS=Homo sapiens OX=9606 GN=C8G PE=1 SV=3	1	7	7	7	2	2	3	1	1	2	5	4	3	5	4	5	1	2	2	2	1	2	2	2	3	1	1	2	5	4	3	5	4	5	1	2	2	2	1	2	2	2	3	1
sp|P07384|CAN1_HUMAN	sp|P07384|CAN1_HUMAN	34	34	34	sp|P07384|CAN1_HUMAN Calpain-1 catalytic subunit OS=Homo sapiens OX=9606 GN=CAPN1 PE=1 SV=1	1	34	34	34	20	18	19	18	18	23	19	21	18	19	21	19	24	22	24	25	21	24	20	18	19	18	18	23	19	21	18	19	21	19	24	22	24	25	21	24	20	18	19	18
sp|P07437|TBB5_HUMAN;sp|A6NNZ2|TBB8B_HUMAN	sp|P07437|TBB5_HUMAN	22;7	4;0	4;0	sp|P07437|TBB5_HUMAN Tubulin beta chain OS=Homo sapiens OX=9606 GN=TUBB PE=1 SV=2	2	22	4	4	20	20	21	19	22	22	20	20	20	20	21	20	20	19	20	18	19	18	4	4	4	3	4	4	4	4	4	4	4	4	4	4	4	4	4	4	4	4	4	3
sp|P07451|CAH3_HUMAN	sp|P07451|CAH3_HUMAN	4	4	4	sp|P07451|CAH3_HUMAN Carbonic anhydrase 3 OS=Homo sapiens OX=9606 GN=CA3 PE=1 SV=3	1	4	4	4	1	1	2	1	1	2	2	3	2	2	2	3	1	1	2	1	1	1	1	1	2	1	1	2	2	3	2	2	2	3	1	1	2	1	1	1	1	1	2	1
sp|P07476|INVO_HUMAN	sp|P07476|INVO_HUMAN	21	21	21	sp|P07476|INVO_HUMAN Involucrin OS=Homo sapiens OX=9606 GN=IVL PE=1 SV=2	1	21	21	21	5	8	8	7	8	6	5	5	6	7	8	6	16	18	17	17	16	18	5	8	8	7	8	6	5	5	6	7	8	6	16	18	17	17	16	18	5	8	8	7
sp|P07585|PGS2_HUMAN	sp|P07585|PGS2_HUMAN	16	16	15	sp|P07585|PGS2_HUMAN Decorin OS=Homo sapiens OX=9606 GN=DCN PE=1 SV=1	1	16	16	15	9	8	10	8	8	7	15	16	15	14	15	15	7	7	7	6	7	6	9	8	10	8	8	7	15	16	15	14	15	15	7	7	7	6	7	6	8	8	9	7
sp|P07602|SAP_HUMAN	sp|P07602|SAP_HUMAN	20	20	20	sp|P07602|SAP_HUMAN Prosaposin OS=Homo sapiens OX=9606 GN=PSAP PE=1 SV=2	1	20	20	20	14	16	14	14	17	11	6	5	5	6	5	7	7	9	8	11	7	10	14	16	14	14	17	11	6	5	5	6	5	7	7	9	8	11	7	10	14	16	14	14
sp|P07686|HEXB_HUMAN	sp|P07686|HEXB_HUMAN	8	8	8	sp|P07686|HEXB_HUMAN Beta-hexosaminidase subunit beta OS=Homo sapiens OX=9606 GN=HEXB PE=1 SV=3	1	8	8	8	6	5	7	7	7	6	3	4	4	4	3	4	2	3	3	3	3	2	6	5	7	7	7	6	3	4	4	4	3	4	2	3	3	3	3	2	6	5	7	7
sp|P07711|CATL1_HUMAN	sp|P07711|CATL1_HUMAN	2	2	2	sp|P07711|CATL1_HUMAN Procathepsin L OS=Homo sapiens OX=9606 GN=CTSL PE=1 SV=2	1	2	2	2	2	2	1	2	2	2	0	1	1	0	0	0	2	2	2	1	1	1	2	2	1	2	2	2	0	1	1	0	0	0	2	2	2	1	1	1	2	2	1	2
sp|P07737|PROF1_HUMAN;CON__P02584	sp|P07737|PROF1_HUMAN	9;4	9;4	9;4	sp|P07737|PROF1_HUMAN Profilin-1 OS=Homo sapiens OX=9606 GN=PFN1 PE=1 SV=2	2	9	9	9	8	8	8	8	8	8	8	8	8	8	8	8	9	9	9	9	9	8	8	8	8	8	8	8	8	8	8	8	8	8	9	9	9	9	9	8	8	8	8	8
sp|P07738|PMGE_HUMAN	sp|P07738|PMGE_HUMAN	6	6	6	sp|P07738|PMGE_HUMAN Bisphosphoglycerate mutase OS=Homo sapiens OX=9606 GN=BPGM PE=1 SV=2	1	6	6	6	3	4	2	3	3	3	2	2	2	2	1	1	3	3	5	4	4	5	3	4	2	3	3	3	2	2	2	2	1	1	3	3	5	4	4	5	3	4	2	3
sp|P07741|APT_HUMAN	sp|P07741|APT_HUMAN	9	9	9	sp|P07741|APT_HUMAN Adenine phosphoribosyltransferase OS=Homo sapiens OX=9606 GN=APRT PE=1 SV=2	1	9	9	9	3	3	4	5	5	5	5	6	4	5	7	7	7	7	6	7	8	5	3	3	4	5	5	5	5	6	4	5	7	7	7	7	6	7	8	5	3	3	4	5
sp|P07814|SYEP_HUMAN	sp|P07814|SYEP_HUMAN	31	31	31	sp|P07814|SYEP_HUMAN Bifunctional glutamate/proline--tRNA ligase OS=Homo sapiens OX=9606 GN=EPRS1 PE=1 SV=5	1	31	31	31	17	16	15	16	15	16	5	2	3	3	3	2	22	18	18	23	17	14	17	16	15	16	15	16	5	2	3	3	3	2	22	18	18	23	17	14	17	16	15	16
sp|P07858|CATB_HUMAN	sp|P07858|CATB_HUMAN	10	10	10	sp|P07858|CATB_HUMAN Cathepsin B OS=Homo sapiens OX=9606 GN=CTSB PE=1 SV=3	1	10	10	10	10	10	10	10	9	10	7	9	8	8	8	9	10	10	9	10	10	10	10	10	10	10	9	10	7	9	8	8	8	9	10	10	9	10	10	10	10	10	10	10
sp|P07900|HS90A_HUMAN;sp|Q14568|HS902_HUMAN;sp|Q58FG0|HS905_HUMAN;sp|Q58FG1|HS904_HUMAN	sp|P07900|HS90A_HUMAN	41;7;5;2	41;7;5;2	26;2;2;1	sp|P07900|HS90A_HUMAN Heat shock protein HSP 90-alpha OS=Homo sapiens OX=9606 GN=HSP90AA1 PE=1 SV=5	4	41	41	26	33	33	35	32	31	31	22	23	25	22	25	22	36	34	34	34	36	35	33	33	35	32	31	31	22	23	25	22	25	22	36	34	34	34	36	35	19	20	21	19
sp|P07910|HNRPC_HUMAN;sp|P0DMR1|HNRC4_HUMAN;sp|O60812|HNRC1_HUMAN;sp|B7ZW38|HNRC3_HUMAN;sp|B2RXH8|HNRC2_HUMAN	sp|P07910|HNRPC_HUMAN;sp|P0DMR1|HNRC4_HUMAN;sp|O60812|HNRC1_HUMAN;sp|B7ZW38|HNRC3_HUMAN;sp|B2RXH8|HNRC2_HUMAN	11;6;6;6;6	11;6;6;6;6	10;6;6;6;6	sp|P07910|HNRPC_HUMAN Heterogeneous nuclear ribonucleoproteins C1/C2 OS=Homo sapiens OX=9606 GN=HNRNPC PE=1 SV=4;sp|P0DMR1|HNRC4_HUMAN Heterogeneous nuclear ribonucleoprotein C-like 4 OS=Homo sapiens OX=9606 GN=HNRNPCL4 PE=3 SV=1;sp|O60812|HNRC1_HUMAN Hete	5	11	11	10	8	9	7	7	6	9	7	8	7	8	8	8	8	7	7	8	8	9	8	9	7	7	6	9	7	8	7	8	8	8	8	7	7	8	8	9	8	8	7	7
sp|P07919|QCR6_HUMAN;sp|A0A096LP55|QCR6L_HUMAN	sp|P07919|QCR6_HUMAN	3;1	3;1	3;1	sp|P07919|QCR6_HUMAN Cytochrome b-c1 complex subunit 6, mitochondrial OS=Homo sapiens OX=9606 GN=UQCRH PE=1 SV=2	2	3	3	3	2	2	2	1	3	2	1	1	0	0	1	1	1	2	1	1	1	1	2	2	2	1	3	2	1	1	0	0	1	1	1	2	1	1	1	1	2	2	2	1
sp|P07942|LAMB1_HUMAN	sp|P07942|LAMB1_HUMAN	21	21	21	sp|P07942|LAMB1_HUMAN Laminin subunit beta-1 OS=Homo sapiens OX=9606 GN=LAMB1 PE=1 SV=2	1	21	21	21	14	11	11	8	9	11	2	1	0	3	1	1	10	9	15	12	13	11	14	11	11	8	9	11	2	1	0	3	1	1	10	9	15	12	13	11	14	11	11	8
sp|P07947|YES_HUMAN	sp|P07947|YES_HUMAN	2	1	1	sp|P07947|YES_HUMAN Tyrosine-protein kinase Yes OS=Homo sapiens OX=9606 GN=YES1 PE=1 SV=3	1	2	1	1	0	1	0	0	0	1	0	0	0	1	0	0	1	1	0	2	1	1	0	1	0	0	0	1	0	0	0	0	0	0	1	1	0	1	1	1	0	1	0	0
sp|P07948|LYN_HUMAN;sp|P08631|HCK_HUMAN;sp|P06241|FYN_HUMAN	sp|P07948|LYN_HUMAN	6;1;1	6;1;1	5;0;0	sp|P07948|LYN_HUMAN Tyrosine-protein kinase Lyn OS=Homo sapiens OX=9606 GN=LYN PE=1 SV=3	3	6	6	5	1	1	1	1	2	1	0	0	0	1	0	0	0	0	2	1	2	2	1	1	1	1	2	1	0	0	0	1	0	0	0	0	2	1	2	2	1	1	1	1
sp|P07954|FUMH_HUMAN	sp|P07954|FUMH_HUMAN	16	16	16	sp|P07954|FUMH_HUMAN Fumarate hydratase, mitochondrial OS=Homo sapiens OX=9606 GN=FH PE=1 SV=3	1	16	16	16	6	8	8	8	9	9	10	10	7	7	9	8	13	11	14	10	11	13	6	8	8	8	9	9	10	10	7	7	9	8	13	11	14	10	11	13	6	8	8	8
sp|P07996|TSP1_HUMAN;CON__Q28194	sp|P07996|TSP1_HUMAN;CON__Q28194	24;17	24;17	22;16	sp|P07996|TSP1_HUMAN Thrombospondin-1 OS=Homo sapiens OX=9606 GN=THBS1 PE=1 SV=2;	2	24	24	22	10	9	8	8	8	8	13	11	13	8	11	13	12	12	12	12	10	10	10	9	8	8	8	8	13	11	13	8	11	13	12	12	12	12	10	10	9	8	7	7
sp|P08047|SP1_HUMAN	sp|P08047|SP1_HUMAN	1	1	1	sp|P08047|SP1_HUMAN Transcription factor Sp1 OS=Homo sapiens OX=9606 GN=SP1 PE=1 SV=3	1	1	1	1	0	0	0	0	0	0	0	0	0	0	0	0	0	1	0	0	0	0	0	0	0	0	0	0	0	0	0	0	0	0	0	1	0	0	0	0	0	0	0	0
sp|P08123|CO1A2_HUMAN	sp|P08123|CO1A2_HUMAN	20	20	20	sp|P08123|CO1A2_HUMAN Collagen alpha-2(I) chain OS=Homo sapiens OX=9606 GN=COL1A2 PE=1 SV=7	1	20	20	20	7	7	8	7	8	8	14	16	15	14	16	12	4	5	7	6	7	7	7	7	8	7	8	8	14	16	15	14	16	12	4	5	7	6	7	7	7	7	8	7
sp|P08133|ANXA6_HUMAN	sp|P08133|ANXA6_HUMAN	29	29	29	sp|P08133|ANXA6_HUMAN Annexin A6 OS=Homo sapiens OX=9606 GN=ANXA6 PE=1 SV=3	1	29	29	29	19	16	16	18	17	18	14	16	16	19	15	19	21	18	19	20	20	17	19	16	16	18	17	18	14	16	16	19	15	19	21	18	19	20	20	17	19	16	16	18
sp|P08134|RHOC_HUMAN	sp|P08134|RHOC_HUMAN	7	1	1	sp|P08134|RHOC_HUMAN Rho-related GTP-binding protein RhoC OS=Homo sapiens OX=9606 GN=RHOC PE=1 SV=1	1	7	1	1	3	5	4	3	5	3	6	5	6	5	3	3	6	6	5	5	6	5	0	1	0	1	1	1	1	1	1	1	1	1	1	1	1	1	1	1	0	1	0	1
sp|P08185|CBG_HUMAN	sp|P08185|CBG_HUMAN	6	6	6	sp|P08185|CBG_HUMAN Corticosteroid-binding globulin OS=Homo sapiens OX=9606 GN=SERPINA6 PE=1 SV=1	1	6	6	6	1	0	0	0	0	0	5	5	4	4	4	4	1	1	2	2	0	1	1	0	0	0	0	0	5	5	4	4	4	4	1	1	2	2	0	1	1	0	0	0
sp|P08195|4F2_HUMAN	sp|P08195|4F2_HUMAN	10	10	10	sp|P08195|4F2_HUMAN 4F2 cell-surface antigen heavy chain OS=Homo sapiens OX=9606 GN=SLC3A2 PE=1 SV=3	1	10	10	10	5	6	5	5	7	6	1	1	0	0	0	0	4	5	4	4	3	5	5	6	5	5	7	6	1	1	0	0	0	0	4	5	4	4	3	5	5	6	5	5
sp|P08236|BGLR_HUMAN	sp|P08236|BGLR_HUMAN	2	2	2	sp|P08236|BGLR_HUMAN Beta-glucuronidase OS=Homo sapiens OX=9606 GN=GUSB PE=1 SV=2	1	2	2	2	1	0	1	2	0	2	0	0	0	0	0	0	0	0	0	0	0	0	1	0	1	2	0	2	0	0	0	0	0	0	0	0	0	0	0	0	1	0	1	2
sp|P08237|PFKAM_HUMAN	sp|P08237|PFKAM_HUMAN	6	5	5	sp|P08237|PFKAM_HUMAN ATP-dependent 6-phosphofructokinase, muscle type OS=Homo sapiens OX=9606 GN=PFKM PE=1 SV=2	1	6	5	5	1	1	2	2	2	1	3	3	2	2	3	3	2	3	0	2	2	1	0	0	1	1	1	1	2	2	1	1	2	2	1	2	0	1	1	0	0	0	1	1
sp|P08238|HS90B_HUMAN;sp|Q58FF7|H90B3_HUMAN	sp|P08238|HS90B_HUMAN	40;15	23;6	22;6	sp|P08238|HS90B_HUMAN Heat shock protein HSP 90-beta OS=Homo sapiens OX=9606 GN=HSP90AB1 PE=1 SV=4	2	40	23	22	32	30	32	31	34	31	19	22	21	22	21	18	30	33	29	32	32	34	16	15	16	16	18	16	12	12	11	13	12	11	14	18	16	17	17	19	15	14	15	15
sp|P08240|SRPRA_HUMAN	sp|P08240|SRPRA_HUMAN	9	9	9	sp|P08240|SRPRA_HUMAN Signal recognition particle receptor subunit alpha OS=Homo sapiens OX=9606 GN=SRPRA PE=1 SV=2	1	9	9	9	2	5	4	2	3	3	0	0	0	0	0	0	4	3	3	4	5	6	2	5	4	2	3	3	0	0	0	0	0	0	4	3	3	4	5	6	2	5	4	2
sp|P08243|ASNS_HUMAN	sp|P08243|ASNS_HUMAN	3	3	3	sp|P08243|ASNS_HUMAN Asparagine synthetase [glutamine-hydrolyzing] OS=Homo sapiens OX=9606 GN=ASNS PE=1 SV=4	1	3	3	3	0	0	0	0	0	0	0	0	0	0	0	0	2	3	2	2	3	3	0	0	0	0	0	0	0	0	0	0	0	0	2	3	2	2	3	3	0	0	0	0
sp|P08246|ELNE_HUMAN	sp|P08246|ELNE_HUMAN	4	4	4	sp|P08246|ELNE_HUMAN Neutrophil elastase OS=Homo sapiens OX=9606 GN=ELANE PE=1 SV=1	1	4	4	4	4	4	3	4	4	3	2	2	2	1	2	3	3	3	2	1	3	2	4	4	3	4	4	3	2	2	2	1	2	3	3	3	2	1	3	2	4	4	3	4
sp|P08253|MMP2_HUMAN	sp|P08253|MMP2_HUMAN	7	7	7	sp|P08253|MMP2_HUMAN 72 kDa type IV collagenase OS=Homo sapiens OX=9606 GN=MMP2 PE=1 SV=2	1	7	7	7	1	2	0	1	2	2	2	4	2	4	2	4	1	2	0	0	1	2	1	2	0	1	2	2	2	4	2	4	2	4	1	2	0	0	1	2	1	2	0	1
sp|P08294|SODE_HUMAN	sp|P08294|SODE_HUMAN	8	8	8	sp|P08294|SODE_HUMAN Extracellular superoxide dismutase [Cu-Zn] OS=Homo sapiens OX=9606 GN=SOD3 PE=1 SV=2	1	8	8	8	4	4	5	4	4	4	6	6	7	7	8	7	1	0	2	1	0	0	4	4	5	4	4	4	6	6	7	7	8	7	1	0	2	1	0	0	4	4	5	4
sp|P08311|CATG_HUMAN	sp|P08311|CATG_HUMAN	12	12	12	sp|P08311|CATG_HUMAN Cathepsin G OS=Homo sapiens OX=9606 GN=CTSG PE=1 SV=2	1	12	12	12	4	4	4	3	5	5	8	8	8	10	9	10	3	2	2	3	2	3	4	4	4	3	5	5	8	8	8	10	9	10	3	2	2	3	2	3	4	4	4	3
sp|P08397|HEM3_HUMAN	sp|P08397|HEM3_HUMAN	3	3	3	sp|P08397|HEM3_HUMAN Porphobilinogen deaminase OS=Homo sapiens OX=9606 GN=HMBS PE=1 SV=2	1	3	3	3	3	2	2	2	2	2	1	1	1	1	1	2	2	3	2	3	3	3	3	2	2	2	2	2	1	1	1	1	1	2	2	3	2	3	3	3	3	2	2	2
sp|P08473|NEP_HUMAN	sp|P08473|NEP_HUMAN	5	5	5	sp|P08473|NEP_HUMAN Neprilysin OS=Homo sapiens OX=9606 GN=MME PE=1 SV=2	1	5	5	5	1	3	1	1	2	4	0	0	0	0	0	0	0	0	0	0	0	0	1	3	1	1	2	4	0	0	0	0	0	0	0	0	0	0	0	0	1	3	1	1
sp|P08514|ITA2B_HUMAN	sp|P08514|ITA2B_HUMAN	14	14	14	sp|P08514|ITA2B_HUMAN Integrin alpha-IIb OS=Homo sapiens OX=9606 GN=ITGA2B PE=1 SV=3	1	14	14	14	4	3	5	5	4	4	2	3	3	2	3	2	6	3	3	4	2	5	4	3	5	5	4	4	2	3	3	2	3	2	6	3	3	4	2	5	4	3	5	5
sp|P08519|APOA_HUMAN	sp|P08519|APOA_HUMAN	2	1	1	sp|P08519|APOA_HUMAN Apolipoprotein(a) OS=Homo sapiens OX=9606 GN=LPA PE=1 SV=1	1	2	1	1	1	1	1	0	1	1	1	1	1	1	1	1	0	0	0	0	0	0	1	1	1	0	1	1	0	0	0	0	0	0	0	0	0	0	0	0	1	1	1	0
sp|P08559|ODPA_HUMAN;sp|P29803|ODPAT_HUMAN	sp|P08559|ODPA_HUMAN	9;2	9;2	9;2	sp|P08559|ODPA_HUMAN Pyruvate dehydrogenase E1 component subunit alpha, somatic form, mitochondrial OS=Homo sapiens OX=9606 GN=PDHA1 PE=1 SV=3	2	9	9	9	7	6	6	7	5	6	2	2	1	2	1	2	5	5	4	3	3	5	7	6	6	7	5	6	2	2	1	2	1	2	5	5	4	3	3	5	7	6	6	7
sp|P08567|PLEK_HUMAN	sp|P08567|PLEK_HUMAN	3	3	3	sp|P08567|PLEK_HUMAN Pleckstrin OS=Homo sapiens OX=9606 GN=PLEK PE=1 SV=3	1	3	3	3	0	1	1	1	1	2	1	1	0	1	1	1	3	3	3	2	3	3	0	1	1	1	1	2	1	1	0	1	1	1	3	3	3	2	3	3	0	1	1	1
sp|P08571|CD14_HUMAN	sp|P08571|CD14_HUMAN	5	5	5	sp|P08571|CD14_HUMAN Monocyte differentiation antigen CD14 OS=Homo sapiens OX=9606 GN=CD14 PE=1 SV=2	1	5	5	5	3	3	3	3	3	3	4	4	4	4	4	3	3	3	3	2	2	3	3	3	3	3	3	3	4	4	4	4	4	3	3	3	3	2	2	3	3	3	3	3
sp|P08572|CO4A2_HUMAN	sp|P08572|CO4A2_HUMAN	8	8	8	sp|P08572|CO4A2_HUMAN Collagen alpha-2(IV) chain OS=Homo sapiens OX=9606 GN=COL4A2 PE=1 SV=4	1	8	8	8	2	1	0	0	2	0	6	5	6	8	7	6	0	0	0	0	0	0	2	1	0	0	2	0	6	5	6	8	7	6	0	0	0	0	0	0	2	1	0	0
sp|P08574|CY1_HUMAN	sp|P08574|CY1_HUMAN	7	7	7	sp|P08574|CY1_HUMAN Cytochrome c1, heme protein, mitochondrial OS=Homo sapiens OX=9606 GN=CYC1 PE=1 SV=3	1	7	7	7	5	6	5	6	6	5	2	2	4	3	3	4	5	5	6	5	4	5	5	6	5	6	6	5	2	2	4	3	3	4	5	5	6	5	4	5	5	6	5	6
sp|P08575|PTPRC_HUMAN	sp|P08575|PTPRC_HUMAN	7	7	7	sp|P08575|PTPRC_HUMAN Receptor-type tyrosine-protein phosphatase C OS=Homo sapiens OX=9606 GN=PTPRC PE=1 SV=3	1	7	7	7	2	5	2	3	4	4	1	0	0	1	0	0	3	2	3	3	3	2	2	5	2	3	4	4	1	0	0	1	0	0	3	2	3	3	3	2	2	5	2	3
sp|P08579|RU2B_HUMAN	sp|P08579|RU2B_HUMAN	4	2	2	sp|P08579|RU2B_HUMAN U2 small nuclear ribonucleoprotein B OS=Homo sapiens OX=9606 GN=SNRPB2 PE=1 SV=1	1	4	2	2	3	3	2	3	2	2	1	1	3	1	2	1	2	2	3	3	3	3	2	2	1	2	1	1	0	0	1	0	0	0	1	1	2	2	2	2	2	2	1	2
sp|P08603|CFAH_HUMAN;sp|Q02985|FHR3_HUMAN	sp|P08603|CFAH_HUMAN	42;1	42;1	40;1	sp|P08603|CFAH_HUMAN Complement factor H OS=Homo sapiens OX=9606 GN=CFH PE=1 SV=4	2	42	42	40	30	31	32	30	31	28	28	27	28	28	26	27	33	35	33	31	34	33	30	31	32	30	31	28	28	27	28	28	26	27	33	35	33	31	34	33	29	30	30	29
sp|P08621|RU17_HUMAN	sp|P08621|RU17_HUMAN	4	4	4	sp|P08621|RU17_HUMAN U1 small nuclear ribonucleoprotein 70 kDa OS=Homo sapiens OX=9606 GN=SNRNP70 PE=1 SV=2	1	4	4	4	1	1	0	1	0	1	1	1	1	1	1	0	1	2	2	2	2	1	1	1	0	1	0	1	1	1	1	1	1	0	1	2	2	2	2	1	1	1	0	1
sp|P08648|ITA5_HUMAN	sp|P08648|ITA5_HUMAN	3	3	3	sp|P08648|ITA5_HUMAN Integrin alpha-5 OS=Homo sapiens OX=9606 GN=ITGA5 PE=1 SV=2	1	3	3	3	1	1	1	1	0	1	2	2	1	1	2	2	0	0	0	0	0	0	1	1	1	1	0	1	2	2	1	1	2	2	0	0	0	0	0	0	1	1	1	1
sp|P08651|NFIC_HUMAN	sp|P08651|NFIC_HUMAN	3	3	3	sp|P08651|NFIC_HUMAN Nuclear factor 1 C-type OS=Homo sapiens OX=9606 GN=NFIC PE=1 SV=2	1	3	3	3	0	0	0	0	0	0	0	0	0	0	0	0	1	1	1	0	1	0	0	0	0	0	0	0	0	0	0	0	0	0	1	1	1	0	1	0	0	0	0	0
sp|P08670|VIME_HUMAN;sp|P14136|GFAP_HUMAN;sp|Q16352|AINX_HUMAN;sp|P07196|NFL_HUMAN	sp|P08670|VIME_HUMAN	47;2;1;1	46;1;1;1	39;1;0;0	sp|P08670|VIME_HUMAN Vimentin OS=Homo sapiens OX=9606 GN=VIM PE=1 SV=4	4	47	46	39	44	41	42	41	43	43	41	38	39	40	40	39	36	37	34	37	34	35	43	40	41	40	42	42	40	37	38	39	39	38	35	36	33	36	33	34	37	34	34	33
sp|P08697|A2AP_HUMAN;CON__P28800	sp|P08697|A2AP_HUMAN	9;2	9;2	9;2	sp|P08697|A2AP_HUMAN Alpha-2-antiplasmin OS=Homo sapiens OX=9606 GN=SERPINF2 PE=1 SV=3	2	9	9	9	1	0	0	0	1	0	8	7	8	8	7	7	0	0	0	1	1	1	1	0	0	0	1	0	8	7	8	8	7	7	0	0	0	1	1	1	1	0	0	0
sp|P08708|RS17_HUMAN	sp|P08708|RS17_HUMAN	7	7	7	sp|P08708|RS17_HUMAN 40S ribosomal protein S17 OS=Homo sapiens OX=9606 GN=RPS17 PE=1 SV=2	1	7	7	7	4	4	4	5	4	4	4	3	4	5	4	4	4	4	5	4	3	3	4	4	4	5	4	4	4	3	4	5	4	4	4	4	5	4	3	3	4	4	4	5
sp|P08729|K2C7_HUMAN;CON__Q3KNV1	sp|P08729|K2C7_HUMAN;CON__Q3KNV1	32;32	2;2	2;2	sp|P08729|K2C7_HUMAN Keratin, type II cytoskeletal 7 OS=Homo sapiens OX=9606 GN=KRT7 PE=1 SV=5;	2	32	2	2	30	29	30	27	30	27	12	10	9	9	11	11	12	12	13	12	13	11	2	2	2	1	2	1	1	1	1	1	1	1	1	1	1	1	1	1	2	2	2	1
sp|P08754|GNAI3_HUMAN	sp|P08754|GNAI3_HUMAN	10	5	5	sp|P08754|GNAI3_HUMAN Guanine nucleotide-binding protein G(i) subunit alpha-3 OS=Homo sapiens OX=9606 GN=GNAI3 PE=1 SV=3	1	10	5	5	9	8	9	8	8	8	5	3	4	3	4	4	8	9	8	8	9	8	4	4	4	4	4	4	2	1	1	1	1	2	4	5	4	4	5	4	4	4	4	4
sp|P08758|ANXA5_HUMAN	sp|P08758|ANXA5_HUMAN	24	24	24	sp|P08758|ANXA5_HUMAN Annexin A5 OS=Homo sapiens OX=9606 GN=ANXA5 PE=1 SV=2	1	24	24	24	20	21	19	20	20	19	18	17	19	16	17	16	17	17	17	18	18	17	20	21	19	20	20	19	18	17	19	16	17	16	17	17	17	18	18	17	20	21	19	20
sp|P08779|K1C16_HUMAN;CON__P08779;CON__Q9Z2K1;CON__Q3ZAW8	sp|P08779|K1C16_HUMAN;CON__P08779	48;48;15;15	48;48;15;15	30;30;5;5	sp|P08779|K1C16_HUMAN Keratin, type I cytoskeletal 16 OS=Homo sapiens OX=9606 GN=KRT16 PE=1 SV=4;	4	48	48	30	24	24	23	20	23	22	13	12	15	14	13	9	42	43	45	47	44	46	24	24	23	20	23	22	13	12	15	14	13	9	42	43	45	47	44	46	14	15	14	12
sp|P08865|RSSA_HUMAN	sp|P08865|RSSA_HUMAN	14	14	14	sp|P08865|RSSA_HUMAN 40S ribosomal protein SA OS=Homo sapiens OX=9606 GN=RPSA PE=1 SV=4	1	14	14	14	13	13	13	14	13	13	11	9	9	9	9	11	13	12	12	13	12	14	13	13	13	14	13	13	11	9	9	9	9	11	13	12	12	13	12	14	13	13	13	14
sp|P09012|SNRPA_HUMAN	sp|P09012|SNRPA_HUMAN	9	9	7	sp|P09012|SNRPA_HUMAN U1 small nuclear ribonucleoprotein A OS=Homo sapiens OX=9606 GN=SNRPA PE=1 SV=3	1	9	9	7	4	3	5	4	4	4	3	4	2	4	4	1	6	5	5	5	7	6	4	3	5	4	4	4	3	4	2	4	4	1	6	5	5	5	7	6	3	2	4	3
sp|P09104|ENOG_HUMAN	sp|P09104|ENOG_HUMAN	15	12	12	sp|P09104|ENOG_HUMAN Gamma-enolase OS=Homo sapiens OX=9606 GN=ENO2 PE=1 SV=3	1	15	12	12	9	10	10	10	10	9	11	9	11	9	9	10	6	6	7	7	5	7	6	7	7	7	7	6	8	7	8	6	6	7	3	3	4	4	2	4	6	7	7	7
sp|P09110|THIK_HUMAN	sp|P09110|THIK_HUMAN	10	10	10	sp|P09110|THIK_HUMAN 3-ketoacyl-CoA thiolase, peroxisomal OS=Homo sapiens OX=9606 GN=ACAA1 PE=1 SV=2	1	10	10	10	9	7	7	10	8	10	2	2	2	2	2	2	7	5	7	5	6	6	9	7	7	10	8	10	2	2	2	2	2	2	7	5	7	5	6	6	9	7	7	10
sp|P09132|SRP19_HUMAN	sp|P09132|SRP19_HUMAN	1	1	1	sp|P09132|SRP19_HUMAN Signal recognition particle 19 kDa protein OS=Homo sapiens OX=9606 GN=SRP19 PE=1 SV=3	1	1	1	1	1	1	1	1	1	1	0	0	0	0	0	0	1	1	1	1	1	1	1	1	1	1	1	1	0	0	0	0	0	0	1	1	1	1	1	1	1	1	1	1
sp|P09210|GSTA2_HUMAN;sp|P08263|GSTA1_HUMAN	sp|P09210|GSTA2_HUMAN;sp|P08263|GSTA1_HUMAN	1;1	1;1	1;1	sp|P09210|GSTA2_HUMAN Glutathione S-transferase A2 OS=Homo sapiens OX=9606 GN=GSTA2 PE=1 SV=4;sp|P08263|GSTA1_HUMAN Glutathione S-transferase A1 OS=Homo sapiens OX=9606 GN=GSTA1 PE=1 SV=3	2	1	1	1	0	1	1	0	1	0	0	0	0	0	0	0	0	0	0	0	0	0	0	1	1	0	1	0	0	0	0	0	0	0	0	0	0	0	0	0	0	1	1	0
sp|P09211|GSTP1_HUMAN	sp|P09211|GSTP1_HUMAN	13	13	13	sp|P09211|GSTP1_HUMAN Glutathione S-transferase P OS=Homo sapiens OX=9606 GN=GSTP1 PE=1 SV=2	1	13	13	13	9	10	10	10	10	10	11	11	11	11	10	11	12	11	11	12	12	11	9	10	10	10	10	10	11	11	11	11	10	11	12	11	11	12	12	11	9	10	10	10
sp|P09234|RU1C_HUMAN	sp|P09234|RU1C_HUMAN	2	2	2	sp|P09234|RU1C_HUMAN U1 small nuclear ribonucleoprotein C OS=Homo sapiens OX=9606 GN=SNRPC PE=1 SV=1	1	2	2	2	0	0	0	0	0	0	2	1	2	2	2	2	0	1	0	0	0	0	0	0	0	0	0	0	2	1	2	2	2	2	0	1	0	0	0	0	0	0	0	0
sp|P09237|MMP7_HUMAN	sp|P09237|MMP7_HUMAN	5	5	5	sp|P09237|MMP7_HUMAN Matrilysin OS=Homo sapiens OX=9606 GN=MMP7 PE=1 SV=1	1	5	5	5	5	4	4	4	5	4	0	0	0	0	0	0	0	0	0	0	0	0	5	4	4	4	5	4	0	0	0	0	0	0	0	0	0	0	0	0	5	4	4	4
sp|P09382|LEG1_HUMAN	sp|P09382|LEG1_HUMAN	11	11	11	sp|P09382|LEG1_HUMAN Galectin-1 OS=Homo sapiens OX=9606 GN=LGALS1 PE=1 SV=2	1	11	11	11	9	9	8	10	10	7	8	9	9	9	8	9	8	8	10	7	9	9	9	9	8	10	10	7	8	9	9	9	8	9	8	8	10	7	9	9	9	9	8	10
sp|P09417|DHPR_HUMAN	sp|P09417|DHPR_HUMAN	6	6	6	sp|P09417|DHPR_HUMAN Dihydropteridine reductase OS=Homo sapiens OX=9606 GN=QDPR PE=1 SV=2	1	6	6	6	3	3	3	3	3	3	4	3	3	3	4	2	2	2	1	2	2	1	3	3	3	3	3	3	4	3	3	3	4	2	2	2	1	2	2	1	3	3	3	3
sp|P09429|HMGB1_HUMAN;sp|B2RPK0|HGB1A_HUMAN	sp|P09429|HMGB1_HUMAN;sp|B2RPK0|HGB1A_HUMAN	9;5	9;5	6;2	sp|P09429|HMGB1_HUMAN High mobility group protein B1 OS=Homo sapiens OX=9606 GN=HMGB1 PE=1 SV=3;sp|B2RPK0|HGB1A_HUMAN Putative high mobility group protein B1-like 1 OS=Homo sapiens OX=9606 GN=HMGB1P1 PE=5 SV=1	2	9	9	6	7	7	7	7	7	7	5	5	4	5	5	5	6	6	6	6	7	5	7	7	7	7	7	7	5	5	4	5	5	5	6	6	6	6	7	5	6	6	6	6
sp|P09455|RET1_HUMAN	sp|P09455|RET1_HUMAN	14	14	14	sp|P09455|RET1_HUMAN Retinol-binding protein 1 OS=Homo sapiens OX=9606 GN=RBP1 PE=1 SV=2	1	14	14	14	12	13	12	11	11	11	0	0	1	0	1	0	4	3	3	2	3	4	12	13	12	11	11	11	0	0	1	0	1	0	4	3	3	2	3	4	12	13	12	11
sp|P09466|PAEP_HUMAN	sp|P09466|PAEP_HUMAN	2	2	2	sp|P09466|PAEP_HUMAN Glycodelin OS=Homo sapiens OX=9606 GN=PAEP PE=1 SV=2	1	2	2	2	0	0	0	0	0	0	0	0	0	0	0	0	2	2	1	2	1	1	0	0	0	0	0	0	0	0	0	0	0	0	2	2	1	2	1	1	0	0	0	0
sp|P09467|F16P1_HUMAN	sp|P09467|F16P1_HUMAN	4	4	4	sp|P09467|F16P1_HUMAN Fructose-1,6-bisphosphatase 1 OS=Homo sapiens OX=9606 GN=FBP1 PE=1 SV=5	1	4	4	4	1	1	1	1	2	2	1	2	1	1	2	1	1	1	1	2	1	4	1	1	1	1	2	2	1	2	1	1	2	1	1	1	1	2	1	4	1	1	1	1
sp|P09486|SPRC_HUMAN	sp|P09486|SPRC_HUMAN	2	2	2	sp|P09486|SPRC_HUMAN SPARC OS=Homo sapiens OX=9606 GN=SPARC PE=1 SV=1	1	2	2	2	0	0	0	0	1	0	0	0	0	0	0	0	2	1	1	2	2	2	0	0	0	0	1	0	0	0	0	0	0	0	2	1	1	2	2	2	0	0	0	0
sp|P09493|TPM1_HUMAN	sp|P09493|TPM1_HUMAN	25	25	11	sp|P09493|TPM1_HUMAN Tropomyosin alpha-1 chain OS=Homo sapiens OX=9606 GN=TPM1 PE=1 SV=2	1	25	25	11	20	21	20	20	20	20	20	19	18	21	18	20	8	12	13	14	15	12	20	21	20	20	20	20	20	19	18	21	18	20	8	12	13	14	15	12	9	9	9	9
sp|P09496|CLCA_HUMAN	sp|P09496|CLCA_HUMAN	5	5	5	sp|P09496|CLCA_HUMAN Clathrin light chain A OS=Homo sapiens OX=9606 GN=CLTA PE=1 SV=1	1	5	5	5	3	3	1	3	3	1	2	2	2	2	2	2	5	4	0	5	3	3	3	3	1	3	3	1	2	2	2	2	2	2	5	4	0	5	3	3	3	3	1	3
sp|P09497|CLCB_HUMAN	sp|P09497|CLCB_HUMAN	6	6	6	sp|P09497|CLCB_HUMAN Clathrin light chain B OS=Homo sapiens OX=9606 GN=CLTB PE=1 SV=1	1	6	6	6	2	2	2	2	1	2	1	1	2	1	1	1	3	5	3	3	3	4	2	2	2	2	1	2	1	1	2	1	1	1	3	5	3	3	3	4	2	2	2	2
sp|P09525|ANXA4_HUMAN	sp|P09525|ANXA4_HUMAN	13	13	13	sp|P09525|ANXA4_HUMAN Annexin A4 OS=Homo sapiens OX=9606 GN=ANXA4 PE=1 SV=4	1	13	13	13	8	9	8	10	7	13	6	6	7	7	7	6	8	9	9	10	8	9	8	9	8	10	7	13	6	6	7	7	7	6	8	9	9	10	8	9	8	9	8	10
sp|P09543|CN37_HUMAN	sp|P09543|CN37_HUMAN	4	4	4	sp|P09543|CN37_HUMAN 2,3-cyclic-nucleotide 3-phosphodiesterase OS=Homo sapiens OX=9606 GN=CNP PE=1 SV=2	1	4	4	4	1	1	1	3	1	1	0	0	0	0	0	0	2	3	4	3	3	2	1	1	1	3	1	1	0	0	0	0	0	0	2	3	4	3	3	2	1	1	1	3
sp|P09601|HMOX1_HUMAN	sp|P09601|HMOX1_HUMAN	1	1	1	sp|P09601|HMOX1_HUMAN Heme oxygenase 1 OS=Homo sapiens OX=9606 GN=HMOX1 PE=1 SV=1	1	1	1	1	1	0	1	0	0	1	0	0	0	0	0	0	0	0	0	0	1	0	1	0	1	0	0	1	0	0	0	0	0	0	0	0	0	0	1	0	1	0	1	0
sp|P09619|PGFRB_HUMAN	sp|P09619|PGFRB_HUMAN	2	2	2	sp|P09619|PGFRB_HUMAN Platelet-derived growth factor receptor beta OS=Homo sapiens OX=9606 GN=PDGFRB PE=1 SV=1	1	2	2	2	0	0	0	0	0	0	1	1	1	1	1	1	0	0	1	0	0	0	0	0	0	0	0	0	1	1	1	1	1	1	0	0	1	0	0	0	0	0	0	0
sp|P09622|DLDH_HUMAN	sp|P09622|DLDH_HUMAN	13	13	13	sp|P09622|DLDH_HUMAN Dihydrolipoyl dehydrogenase, mitochondrial OS=Homo sapiens OX=9606 GN=DLD PE=1 SV=2	1	13	13	13	7	6	5	7	8	10	4	6	5	5	5	5	10	10	9	9	10	9	7	6	5	7	8	10	4	6	5	5	5	5	10	10	9	9	10	9	7	6	5	7
sp|P09651|ROA1_HUMAN;sp|Q32P51|RA1L2_HUMAN	sp|P09651|ROA1_HUMAN;sp|Q32P51|RA1L2_HUMAN	19;13	17;11	17;11	sp|P09651|ROA1_HUMAN Heterogeneous nuclear ribonucleoprotein A1 OS=Homo sapiens OX=9606 GN=HNRNPA1 PE=1 SV=5;sp|Q32P51|RA1L2_HUMAN Heterogeneous nuclear ribonucleoprotein A1-like 2 OS=Homo sapiens OX=9606 GN=HNRNPA1L2 PE=2 SV=2	2	19	17	17	16	14	15	15	15	16	10	10	11	9	10	10	14	16	13	15	13	14	15	13	13	14	13	15	9	10	11	9	9	10	12	14	12	13	11	12	15	13	13	14
sp|P09661|RU2A_HUMAN	sp|P09661|RU2A_HUMAN	4	4	4	sp|P09661|RU2A_HUMAN U2 small nuclear ribonucleoprotein A OS=Homo sapiens OX=9606 GN=SNRPA1 PE=1 SV=2	1	4	4	4	2	3	4	4	3	4	2	1	2	2	2	1	3	3	3	3	3	4	2	3	4	4	3	4	2	1	2	2	2	1	3	3	3	3	3	4	2	3	4	4
sp|P09668|CATH_HUMAN	sp|P09668|CATH_HUMAN	6	6	6	sp|P09668|CATH_HUMAN Pro-cathepsin H OS=Homo sapiens OX=9606 GN=CTSH PE=1 SV=4	1	6	6	6	5	5	4	4	3	2	1	1	1	1	1	1	3	3	2	2	2	3	5	5	4	4	3	2	1	1	1	1	1	1	3	3	2	2	2	3	5	5	4	4
sp|P09669|COX6C_HUMAN	sp|P09669|COX6C_HUMAN	2	2	2	sp|P09669|COX6C_HUMAN Cytochrome c oxidase subunit 6C OS=Homo sapiens OX=9606 GN=COX6C PE=1 SV=2	1	2	2	2	1	1	1	0	0	1	0	0	0	0	0	0	0	1	1	1	1	1	1	1	1	0	0	1	0	0	0	0	0	0	0	1	1	1	1	1	1	1	1	0
sp|P09758|TACD2_HUMAN	sp|P09758|TACD2_HUMAN	11	11	11	sp|P09758|TACD2_HUMAN Tumor-associated calcium signal transducer 2 OS=Homo sapiens OX=9606 GN=TACSTD2 PE=1 SV=3	1	11	11	11	5	6	7	7	6	8	2	1	2	2	3	2	9	7	8	10	8	8	5	6	7	7	6	8	2	1	2	2	3	2	9	7	8	10	8	8	5	6	7	7
sp|P09871|C1S_HUMAN	sp|P09871|C1S_HUMAN	12	12	12	sp|P09871|C1S_HUMAN Complement C1s subcomponent OS=Homo sapiens OX=9606 GN=C1S PE=1 SV=1	1	12	12	12	2	1	2	2	0	2	5	6	4	4	5	5	3	2	5	5	3	5	2	1	2	2	0	2	5	6	4	4	5	5	3	2	5	5	3	5	2	1	2	2
sp|P09874|PARP1_HUMAN	sp|P09874|PARP1_HUMAN	17	17	17	sp|P09874|PARP1_HUMAN Poly [ADP-ribose] polymerase 1 OS=Homo sapiens OX=9606 GN=PARP1 PE=1 SV=4	1	17	17	17	10	7	9	7	8	9	2	2	2	1	1	1	5	5	7	4	5	5	10	7	9	7	8	9	2	2	2	1	1	1	5	5	7	4	5	5	10	7	9	7
sp|P09913|IFIT2_HUMAN	sp|P09913|IFIT2_HUMAN	1	1	1	sp|P09913|IFIT2_HUMAN Interferon-induced protein with tetratricopeptide repeats 2 OS=Homo sapiens OX=9606 GN=IFIT2 PE=1 SV=1	1	1	1	1	0	0	0	0	0	0	0	0	0	0	0	0	1	1	1	0	1	1	0	0	0	0	0	0	0	0	0	0	0	0	1	1	1	0	1	1	0	0	0	0
sp|P09914|IFIT1_HUMAN	sp|P09914|IFIT1_HUMAN	7	7	7	sp|P09914|IFIT1_HUMAN Interferon-induced protein with tetratricopeptide repeats 1 OS=Homo sapiens OX=9606 GN=IFIT1 PE=1 SV=2	1	7	7	7	0	0	0	0	0	0	0	0	0	0	0	0	6	5	6	6	5	5	0	0	0	0	0	0	0	0	0	0	0	0	6	5	6	6	5	5	0	0	0	0
sp|P09917|LOX5_HUMAN	sp|P09917|LOX5_HUMAN	6	6	6	sp|P09917|LOX5_HUMAN Polyunsaturated fatty acid 5-lipoxygenase OS=Homo sapiens OX=9606 GN=ALOX5 PE=1 SV=2	1	6	6	6	1	2	1	1	3	3	0	0	0	0	0	0	2	2	5	4	3	2	1	2	1	1	3	3	0	0	0	0	0	0	2	2	5	4	3	2	1	2	1	1
sp|P09936|UCHL1_HUMAN	sp|P09936|UCHL1_HUMAN	5	5	5	sp|P09936|UCHL1_HUMAN Ubiquitin carboxyl-terminal hydrolase isozyme L1 OS=Homo sapiens OX=9606 GN=UCHL1 PE=1 SV=2	1	5	5	5	3	2	3	2	2	4	4	3	3	3	3	3	2	3	2	1	3	1	3	2	3	2	2	4	4	3	3	3	3	3	2	3	2	1	3	1	3	2	3	2
sp|P09960|LKHA4_HUMAN	sp|P09960|LKHA4_HUMAN	17	17	17	sp|P09960|LKHA4_HUMAN Leukotriene A-4 hydrolase OS=Homo sapiens OX=9606 GN=LTA4H PE=1 SV=2	1	17	17	17	13	14	14	12	13	14	12	12	12	10	12	12	13	10	12	13	14	14	13	14	14	12	13	14	12	12	12	10	12	12	13	10	12	13	14	14	13	14	14	12
sp|P09972|ALDOC_HUMAN	sp|P09972|ALDOC_HUMAN	13	8	8	sp|P09972|ALDOC_HUMAN Fructose-bisphosphate aldolase C OS=Homo sapiens OX=9606 GN=ALDOC PE=1 SV=2	1	13	8	8	7	3	4	6	5	7	7	7	7	7	8	7	7	7	6	7	7	6	3	2	2	2	2	3	4	4	4	4	5	3	3	3	3	3	3	2	3	2	2	2
sp|P0C0L4|CO4A_HUMAN;CON__ENSEMBL:ENSBTAP00000007350	sp|P0C0L4|CO4A_HUMAN	64;8	64;8	4;0	sp|P0C0L4|CO4A_HUMAN Complement C4-A OS=Homo sapiens OX=9606 GN=C4A PE=1 SV=2	2	64	64	4	40	37	37	43	38	40	42	47	40	39	40	44	44	43	46	48	46	50	40	37	37	43	38	40	42	47	40	39	40	44	44	43	46	48	46	50	1	2	1	1
sp|P0C0L5|CO4B_HUMAN	sp|P0C0L5|CO4B_HUMAN	61	2	2	sp|P0C0L5|CO4B_HUMAN Complement C4-B OS=Homo sapiens OX=9606 GN=C4B PE=1 SV=2	1	61	2	2	40	37	37	43	38	40	42	45	38	37	39	42	43	42	44	46	46	48	2	2	2	2	2	2	2	2	2	2	2	2	2	2	2	2	2	2	2	2	2	2
sp|P0C870|JMJD7_HUMAN	sp|P0C870|JMJD7_HUMAN	1	1	1	sp|P0C870|JMJD7_HUMAN Bifunctional peptidase and (3S)-lysyl hydroxylase JMJD7 OS=Homo sapiens OX=9606 GN=JMJD7 PE=1 SV=1	1	1	1	1	1	0	0	1	0	0	0	0	0	0	0	0	0	0	0	0	0	0	1	0	0	1	0	0	0	0	0	0	0	0	0	0	0	0	0	0	1	0	0	1
sp|P0CG30|GSTT2_HUMAN;sp|P0CG29|GST2_HUMAN	sp|P0CG30|GSTT2_HUMAN;sp|P0CG29|GST2_HUMAN	1;1	1;1	1;1	sp|P0CG30|GSTT2_HUMAN Glutathione S-transferase theta-2B OS=Homo sapiens OX=9606 GN=GSTT2B PE=1 SV=1;sp|P0CG29|GST2_HUMAN Glutathione S-transferase theta-2 OS=Homo sapiens OX=9606 GN=GSTT2 PE=1 SV=1	2	1	1	1	0	0	0	0	0	0	0	0	0	0	0	0	1	1	1	1	1	1	0	0	0	0	0	0	0	0	0	0	0	0	1	1	1	1	1	1	0	0	0	0
sp|P0DMV9|HS71B_HUMAN;sp|P0DMV8|HS71A_HUMAN	sp|P0DMV9|HS71B_HUMAN;sp|P0DMV8|HS71A_HUMAN	34;34	34;34	16;16	sp|P0DMV9|HS71B_HUMAN Heat shock 70 kDa protein 1B OS=Homo sapiens OX=9606 GN=HSPA1B PE=1 SV=1;sp|P0DMV8|HS71A_HUMAN Heat shock 70 kDa protein 1A OS=Homo sapiens OX=9606 GN=HSPA1A PE=1 SV=1	2	34	34	16	28	30	27	27	31	28	25	30	27	29	28	30	29	32	31	29	30	29	28	30	27	27	31	28	25	30	27	29	28	30	29	32	31	29	30	29	15	16	14	15
sp|P0DN26|PAL4F_HUMAN;sp|F5H284|PAL4D_HUMAN;sp|A0A075B759|PAL4E_HUMAN;sp|Q9Y536|PAL4A_HUMAN;sp|A0A0B4J2A2|PAL4C_HUMAN;sp|A0A075B767|PAL4H_HUMAN;sp|P0DN37|PAL4G_HUMAN	sp|P0DN26|PAL4F_HUMAN;sp|F5H284|PAL4D_HUMAN;sp|A0A075B759|PAL4E_HUMAN;sp|Q9Y536|PAL4A_HUMAN;sp|A0A0B4J2A2|PAL4C_HUMAN;sp|A0A075B767|PAL4H_HUMAN	3;3;3;2;2;2;1	1;1;1;0;0;0;0	1;1;1;0;0;0;0	sp|P0DN26|PAL4F_HUMAN Peptidyl-prolyl cis-trans isomerase A-like 4F OS=Homo sapiens OX=9606 GN=PPIAL4F PE=3 SV=1;sp|F5H284|PAL4D_HUMAN Peptidyl-prolyl cis-trans isomerase A-like 4D OS=Homo sapiens OX=9606 GN=PPIAL4D PE=3 SV=1;sp|A0A075B759|PAL4E_HUMAN Pept	7	3	1	1	2	2	2	2	2	2	1	2	1	1	2	1	2	2	2	2	2	2	0	0	0	0	0	0	0	1	0	0	1	0	0	0	0	0	0	0	0	0	0	0
sp|P0DN76|U2AF5_HUMAN;sp|Q01081|U2AF1_HUMAN;sp|Q8WU68|U2AF4_HUMAN	sp|P0DN76|U2AF5_HUMAN;sp|Q01081|U2AF1_HUMAN	5;5;2	5;5;2	5;5;2	sp|P0DN76|U2AF5_HUMAN Splicing factor U2AF 35 kDa subunit-like protein OS=Homo sapiens OX=9606 GN=U2AF1L5 PE=1 SV=1;sp|Q01081|U2AF1_HUMAN Splicing factor U2AF 35 kDa subunit OS=Homo sapiens OX=9606 GN=U2AF1 PE=1 SV=3	3	5	5	5	3	3	5	3	3	3	2	1	2	1	1	1	3	3	4	3	3	3	3	3	5	3	3	3	2	1	2	1	1	1	3	3	4	3	3	3	3	3	5	3
sp|P0DOY3|IGLC3_HUMAN;sp|P0DOY2|IGLC2_HUMAN;sp|P0CF74|IGLC6_HUMAN;sp|A0M8Q6|IGLC7_HUMAN	sp|P0DOY3|IGLC3_HUMAN;sp|P0DOY2|IGLC2_HUMAN;sp|P0CF74|IGLC6_HUMAN	5;5;3;2	2;2;1;1	2;2;1;1	sp|P0DOY3|IGLC3_HUMAN Immunoglobulin lambda constant 3 OS=Homo sapiens OX=9606 GN=IGLC3 PE=1 SV=1;sp|P0DOY2|IGLC2_HUMAN Immunoglobulin lambda constant 2 OS=Homo sapiens OX=9606 GN=IGLC2 PE=1 SV=1;sp|P0CF74|IGLC6_HUMAN Immunoglobulin lambda constant 6 OS=Ho	4	5	2	2	5	5	4	4	3	4	5	5	5	4	5	4	5	4	4	4	4	5	2	2	2	2	1	1	2	2	2	2	2	2	2	2	2	1	2	2	2	2	2	2
sp|P0DP01|HV108_HUMAN	sp|P0DP01|HV108_HUMAN	2	1	1	sp|P0DP01|HV108_HUMAN Immunoglobulin heavy variable 1-8 OS=Homo sapiens OX=9606 GN=IGHV1-8 PE=3 SV=1	1	2	1	1	1	1	1	1	1	1	1	1	1	1	1	2	1	1	1	1	1	1	0	0	0	0	0	0	0	0	0	0	0	1	0	0	0	0	0	0	0	0	0	0
sp|P0DP02|HVC33_HUMAN;sp|P01772|HV333_HUMAN	sp|P0DP02|HVC33_HUMAN;sp|P01772|HV333_HUMAN	4;3	3;2	0;0	sp|P0DP02|HVC33_HUMAN Immunoglobulin heavy variable 3-30-3 OS=Homo sapiens OX=9606 GN=IGHV3-30-3 PE=3 SV=1;sp|P01772|HV333_HUMAN Immunoglobulin heavy variable 3-33 OS=Homo sapiens OX=9606 GN=IGHV3-33 PE=1 SV=2	2	4	3	0	2	2	1	2	2	2	3	4	4	3	3	3	2	2	2	1	2	2	1	1	0	1	1	1	2	3	3	2	2	2	1	1	1	0	1	1	0	0	0	0
sp|P0DP04|HV43D_HUMAN;sp|P01782|HV309_HUMAN	sp|P0DP04|HV43D_HUMAN;sp|P01782|HV309_HUMAN	2;2	1;1	1;1	sp|P0DP04|HV43D_HUMAN Immunoglobulin heavy variable 3-43D OS=Homo sapiens OX=9606 GN=IGHV3-43D PE=3 SV=1;sp|P01782|HV309_HUMAN Immunoglobulin heavy variable 3-9 OS=Homo sapiens OX=9606 GN=IGHV3-9 PE=1 SV=2	2	2	1	1	2	2	2	2	1	2	2	2	2	2	2	2	1	2	1	2	2	1	1	1	1	1	0	1	1	1	1	1	1	1	1	1	1	1	1	1	1	1	1	1
sp|P0DP25|CALM3_HUMAN;sp|P0DP24|CALM2_HUMAN;sp|P0DP23|CALM1_HUMAN;sp|P02585|TNNC2_HUMAN	sp|P0DP25|CALM3_HUMAN;sp|P0DP24|CALM2_HUMAN;sp|P0DP23|CALM1_HUMAN	11;11;11;1	9;9;9;0	9;9;9;0	sp|P0DP25|CALM3_HUMAN Calmodulin-3 OS=Homo sapiens OX=9606 GN=CALM3 PE=1 SV=1;sp|P0DP24|CALM2_HUMAN Calmodulin-2 OS=Homo sapiens OX=9606 GN=CALM2 PE=1 SV=1;sp|P0DP23|CALM1_HUMAN Calmodulin-1 OS=Homo sapiens OX=9606 GN=CALM1 PE=1 SV=1	4	11	9	9	10	10	11	10	9	10	4	6	6	7	5	6	8	9	9	8	10	10	9	9	9	9	8	9	4	6	6	7	5	6	8	8	8	8	8	8	9	9	9	9
sp|P0DPI2|GAL3A_HUMAN;sp|A0A0B4J2D5|GAL3B_HUMAN	sp|P0DPI2|GAL3A_HUMAN;sp|A0A0B4J2D5|GAL3B_HUMAN	9;9	9;9	9;9	sp|P0DPI2|GAL3A_HUMAN Glutamine amidotransferase-like class 1 domain-containing protein 3A, mitochondrial OS=Homo sapiens OX=9606 GN=GATD3A PE=1 SV=1;sp|A0A0B4J2D5|GAL3B_HUMAN Glutamine amidotransferase-like class 1 domain-containing protein 3B, mitochondr	2	9	9	9	3	2	2	4	2	2	5	6	5	5	6	6	4	5	3	4	5	4	3	2	2	4	2	2	5	6	5	5	6	6	4	5	3	4	5	4	3	2	2	4
sp|P10074|TZAP_HUMAN	sp|P10074|TZAP_HUMAN	1	1	1	sp|P10074|TZAP_HUMAN Telomere zinc finger-associated protein OS=Homo sapiens OX=9606 GN=ZBTB48 PE=1 SV=2	1	1	1	1	0	1	1	1	1	1	0	0	0	0	0	0	0	0	0	0	0	0	0	1	1	1	1	1	0	0	0	0	0	0	0	0	0	0	0	0	0	1	1	1
sp|P10114|RAP2A_HUMAN	sp|P10114|RAP2A_HUMAN	4	1	1	sp|P10114|RAP2A_HUMAN Ras-related protein Rap-2a OS=Homo sapiens OX=9606 GN=RAP2A PE=1 SV=1	1	4	1	1	1	0	1	1	0	1	0	0	1	1	0	0	2	2	3	2	3	2	1	0	1	1	0	0	0	0	0	0	0	0	0	0	1	0	1	0	1	0	1	1
sp|P10153|RNAS2_HUMAN	sp|P10153|RNAS2_HUMAN	1	1	1	sp|P10153|RNAS2_HUMAN Non-secretory ribonuclease OS=Homo sapiens OX=9606 GN=RNASE2 PE=1 SV=2	1	1	1	1	0	0	0	0	0	0	0	0	0	0	0	0	0	0	1	1	1	1	0	0	0	0	0	0	0	0	0	0	0	0	0	0	1	1	1	1	0	0	0	0
sp|P10155|RO60_HUMAN	sp|P10155|RO60_HUMAN	8	8	8	sp|P10155|RO60_HUMAN 60 kDa SS-A/Ro ribonucleoprotein OS=Homo sapiens OX=9606 GN=RO60 PE=1 SV=2	1	8	8	8	2	3	3	4	3	4	4	3	3	3	4	3	4	5	4	4	3	4	2	3	3	4	3	4	4	3	3	3	4	3	4	5	4	4	3	4	2	3	3	4
sp|P10176|COX8A_HUMAN	sp|P10176|COX8A_HUMAN	1	1	1	sp|P10176|COX8A_HUMAN Cytochrome c oxidase subunit 8A, mitochondrial OS=Homo sapiens OX=9606 GN=COX8A PE=1 SV=2	1	1	1	1	0	1	1	0	1	1	0	0	0	0	0	0	0	0	0	1	1	0	0	1	1	0	1	1	0	0	0	0	0	0	0	0	0	1	1	0	0	1	1	0
sp|P10253|LYAG_HUMAN	sp|P10253|LYAG_HUMAN	11	11	11	sp|P10253|LYAG_HUMAN Lysosomal alpha-glucosidase OS=Homo sapiens OX=9606 GN=GAA PE=1 SV=4	1	11	11	11	10	9	8	10	9	11	3	4	4	4	4	4	9	7	8	8	8	8	10	9	8	10	9	11	3	4	4	4	4	4	9	7	8	8	8	8	10	9	8	10
sp|P10301|RRAS_HUMAN	sp|P10301|RRAS_HUMAN	6	6	4	sp|P10301|RRAS_HUMAN Ras-related protein R-Ras OS=Homo sapiens OX=9606 GN=RRAS PE=1 SV=1	1	6	6	4	2	2	1	1	2	0	5	4	4	3	3	3	1	1	2	1	3	2	2	2	1	1	2	0	5	4	4	3	3	3	1	1	2	1	3	2	1	1	1	1
sp|P10321|HLAC_HUMAN	sp|P10321|HLAC_HUMAN	8	3	3	sp|P10321|HLAC_HUMAN HLA class I histocompatibility antigen, C alpha chain OS=Homo sapiens OX=9606 GN=HLA-C PE=1 SV=3	1	8	3	3	4	3	4	4	4	5	2	2	2	1	2	1	5	5	4	5	6	3	2	2	2	2	2	3	1	1	1	0	1	0	3	2	2	1	2	1	2	2	2	2
sp|P10412|H14_HUMAN;sp|Q02539|H11_HUMAN;sp|P22492|H1T_HUMAN	sp|P10412|H14_HUMAN	7;3;2	1;0;0	1;0;0	sp|P10412|H14_HUMAN Histone H1.4 OS=Homo sapiens OX=9606 GN=H1-4 PE=1 SV=2	3	7	1	1	3	4	4	4	4	4	5	5	6	7	5	5	5	4	5	5	5	2	1	1	1	1	1	1	0	0	0	1	0	0	1	1	1	1	1	0	1	1	1	1
sp|P10515|ODP2_HUMAN	sp|P10515|ODP2_HUMAN	13	13	13	sp|P10515|ODP2_HUMAN Dihydrolipoyllysine-residue acetyltransferase component of pyruvate dehydrogenase complex, mitochondrial OS=Homo sapiens OX=9606 GN=DLAT PE=1 SV=3	1	13	13	13	10	8	7	8	8	9	2	2	1	2	3	2	3	4	4	3	2	3	10	8	7	8	8	9	2	2	1	2	3	2	3	4	4	3	2	3	10	8	7	8
sp|P10586|PTPRF_HUMAN;sp|P23468|PTPRD_HUMAN;sp|Q13332|PTPRS_HUMAN	sp|P10586|PTPRF_HUMAN	17;1;1	17;1;1	17;1;1	sp|P10586|PTPRF_HUMAN Receptor-type tyrosine-protein phosphatase F OS=Homo sapiens OX=9606 GN=PTPRF PE=1 SV=2	3	17	17	17	0	1	0	1	0	1	1	0	0	0	0	0	11	12	13	11	11	8	0	1	0	1	0	1	1	0	0	0	0	0	11	12	13	11	11	8	0	1	0	1
sp|P10599|THIO_HUMAN	sp|P10599|THIO_HUMAN	9	9	9	sp|P10599|THIO_HUMAN Thioredoxin OS=Homo sapiens OX=9606 GN=TXN PE=1 SV=3	1	9	9	9	6	6	7	7	7	7	6	7	9	8	6	7	6	7	8	6	6	6	6	6	7	7	7	7	6	7	9	8	6	7	6	7	8	6	6	6	6	6	7	7
sp|P10606|COX5B_HUMAN	sp|P10606|COX5B_HUMAN	6	6	6	sp|P10606|COX5B_HUMAN Cytochrome c oxidase subunit 5B, mitochondrial OS=Homo sapiens OX=9606 GN=COX5B PE=1 SV=2	1	6	6	6	3	3	3	3	2	2	3	3	3	3	3	2	4	3	3	4	4	3	3	3	3	3	2	2	3	3	3	3	3	2	4	3	3	4	4	3	3	3	3	3
sp|P10619|PPGB_HUMAN	sp|P10619|PPGB_HUMAN	2	2	2	sp|P10619|PPGB_HUMAN Lysosomal protective protein OS=Homo sapiens OX=9606 GN=CTSA PE=1 SV=2	1	2	2	2	2	2	1	2	2	2	1	1	1	1	2	1	1	1	1	2	2	2	2	2	1	2	2	2	1	1	1	1	2	1	1	1	1	2	2	2	2	2	1	2
sp|P10620|MGST1_HUMAN	sp|P10620|MGST1_HUMAN	4	4	4	sp|P10620|MGST1_HUMAN Microsomal glutathione S-transferase 1 OS=Homo sapiens OX=9606 GN=MGST1 PE=1 SV=1	1	4	4	4	1	1	1	2	2	1	1	1	0	0	0	0	3	4	4	3	3	3	1	1	1	2	2	1	1	1	0	0	0	0	3	4	4	3	3	3	1	1	1	2
sp|P10643|CO7_HUMAN	sp|P10643|CO7_HUMAN	12	12	12	sp|P10643|CO7_HUMAN Complement component C7 OS=Homo sapiens OX=9606 GN=C7 PE=1 SV=2	1	12	12	12	1	4	1	1	0	2	9	6	10	7	8	9	0	2	2	0	1	3	1	4	1	1	0	2	9	6	10	7	8	9	0	2	2	0	1	3	1	4	1	1
sp|P10644|KAP0_HUMAN	sp|P10644|KAP0_HUMAN	9	9	9	sp|P10644|KAP0_HUMAN cAMP-dependent protein kinase type I-alpha regulatory subunit OS=Homo sapiens OX=9606 GN=PRKAR1A PE=1 SV=1	1	9	9	9	3	0	1	0	3	2	1	1	3	0	2	1	3	4	4	6	5	5	3	0	1	0	3	2	1	1	3	0	2	1	3	4	4	6	5	5	3	0	1	0
sp|P10768|ESTD_HUMAN	sp|P10768|ESTD_HUMAN	10	10	10	sp|P10768|ESTD_HUMAN S-formylglutathione hydrolase OS=Homo sapiens OX=9606 GN=ESD PE=1 SV=2	1	10	10	10	5	5	5	5	5	5	9	7	8	6	8	8	6	7	7	7	7	7	5	5	5	5	5	5	9	7	8	6	8	8	6	7	7	7	7	7	5	5	5	5
sp|P10809|CH60_HUMAN	sp|P10809|CH60_HUMAN	36	36	36	sp|P10809|CH60_HUMAN 60 kDa heat shock protein, mitochondrial OS=Homo sapiens OX=9606 GN=HSPD1 PE=1 SV=2	1	36	36	36	24	23	26	27	24	22	21	22	20	18	19	20	30	34	31	30	33	32	24	23	26	27	24	22	21	22	20	18	19	20	30	34	31	30	33	32	24	23	26	27
sp|P10909|CLUS_HUMAN	sp|P10909|CLUS_HUMAN	11	11	11	sp|P10909|CLUS_HUMAN Clusterin OS=Homo sapiens OX=9606 GN=CLU PE=1 SV=1	1	11	11	11	8	9	8	9	8	8	7	8	7	8	7	6	7	7	8	7	8	7	8	9	8	9	8	8	7	8	7	8	7	6	7	7	8	7	8	7	8	9	8	9
sp|P11021|BIP_HUMAN	sp|P11021|BIP_HUMAN	36	36	35	sp|P11021|BIP_HUMAN Endoplasmic reticulum chaperone BiP OS=Homo sapiens OX=9606 GN=HSPA5 PE=1 SV=2	1	36	36	35	31	29	30	28	30	32	19	20	17	19	18	19	30	27	29	29	28	27	31	29	30	28	30	32	19	20	17	19	18	19	30	27	29	29	28	27	30	28	29	27
sp|P11047|LAMC1_HUMAN	sp|P11047|LAMC1_HUMAN	33	33	33	sp|P11047|LAMC1_HUMAN Laminin subunit gamma-1 OS=Homo sapiens OX=9606 GN=LAMC1 PE=1 SV=3	1	33	33	33	20	22	21	18	18	21	14	15	13	12	17	16	13	14	13	14	15	16	20	22	21	18	18	21	14	15	13	12	17	16	13	14	13	14	15	16	20	22	21	18
sp|P11142|HSP7C_HUMAN	sp|P11142|HSP7C_HUMAN	34	30	23	sp|P11142|HSP7C_HUMAN Heat shock cognate 71 kDa protein OS=Homo sapiens OX=9606 GN=HSPA8 PE=1 SV=1	1	34	30	23	29	27	28	27	28	27	25	25	26	24	25	26	27	28	26	28	28	27	26	25	26	25	25	25	22	22	23	21	22	23	25	25	24	26	25	25	21	20	20	20
sp|P11166|GTR1_HUMAN	sp|P11166|GTR1_HUMAN	7	7	7	sp|P11166|GTR1_HUMAN Solute carrier family 2, facilitated glucose transporter member 1 OS=Homo sapiens OX=9606 GN=SLC2A1 PE=1 SV=2	1	7	7	7	5	5	6	5	5	5	4	3	3	4	5	3	7	7	7	7	7	7	5	5	6	5	5	5	4	3	3	4	5	3	7	7	7	7	7	7	5	5	6	5
sp|P11169|GTR3_HUMAN;sp|Q8TDB8|GTR14_HUMAN	sp|P11169|GTR3_HUMAN;sp|Q8TDB8|GTR14_HUMAN	2;1	2;1	2;1	sp|P11169|GTR3_HUMAN Solute carrier family 2, facilitated glucose transporter member 3 OS=Homo sapiens OX=9606 GN=SLC2A3 PE=1 SV=1;sp|Q8TDB8|GTR14_HUMAN Solute carrier family 2, facilitated glucose transporter member 14 OS=Homo sapiens OX=9606 GN=SLC2A14 P	2	2	2	2	1	1	1	1	1	0	1	1	0	0	1	1	0	0	0	1	1	1	1	1	1	1	1	0	1	1	0	0	1	1	0	0	0	1	1	1	1	1	1	1
sp|P11171|EPB41_HUMAN	sp|P11171|EPB41_HUMAN	12	12	11	sp|P11171|EPB41_HUMAN Protein 4.1 OS=Homo sapiens OX=9606 GN=EPB41 PE=1 SV=4	1	12	12	11	4	5	5	5	4	5	4	2	4	6	3	3	6	6	6	8	7	8	4	5	5	5	4	5	4	2	4	6	3	3	6	6	6	8	7	8	3	4	4	4
sp|P11172|UMPS_HUMAN	sp|P11172|UMPS_HUMAN	8	8	8	sp|P11172|UMPS_HUMAN Uridine 5-monophosphate synthase OS=Homo sapiens OX=9606 GN=UMPS PE=1 SV=1	1	8	8	8	2	2	3	2	2	2	1	1	2	1	2	2	6	6	4	5	4	5	2	2	3	2	2	2	1	1	2	1	2	2	6	6	4	5	4	5	2	2	3	2
sp|P11177|ODPB_HUMAN	sp|P11177|ODPB_HUMAN	12	12	12	sp|P11177|ODPB_HUMAN Pyruvate dehydrogenase E1 component subunit beta, mitochondrial OS=Homo sapiens OX=9606 GN=PDHB PE=1 SV=3	1	12	12	12	6	7	7	6	5	6	4	6	6	5	5	7	6	6	5	4	6	6	6	7	7	6	5	6	4	6	6	5	5	7	6	6	5	4	6	6	6	7	7	6
sp|P11182|ODB2_HUMAN	sp|P11182|ODB2_HUMAN	9	9	9	sp|P11182|ODB2_HUMAN Lipoamide acyltransferase component of branched-chain alpha-keto acid dehydrogenase complex, mitochondrial OS=Homo sapiens OX=9606 GN=DBT PE=1 SV=3	1	9	9	9	4	6	5	5	5	3	2	1	2	2	2	1	5	4	6	5	5	4	4	6	5	5	5	3	2	1	2	2	2	1	5	4	6	5	5	4	4	6	5	5
sp|P11215|ITAM_HUMAN	sp|P11215|ITAM_HUMAN	4	4	4	sp|P11215|ITAM_HUMAN Integrin alpha-M OS=Homo sapiens OX=9606 GN=ITGAM PE=1 SV=2	1	4	4	4	1	3	2	3	1	2	0	0	0	0	0	0	2	3	2	2	1	2	1	3	2	3	1	2	0	0	0	0	0	0	2	3	2	2	1	2	1	3	2	3
sp|P11216|PYGB_HUMAN	sp|P11216|PYGB_HUMAN	25	20	18	sp|P11216|PYGB_HUMAN Glycogen phosphorylase, brain form OS=Homo sapiens OX=9606 GN=PYGB PE=1 SV=5	1	25	20	18	7	8	10	10	8	8	18	14	14	9	11	13	9	11	11	7	14	11	7	8	10	10	8	7	15	12	12	7	10	11	6	8	7	4	10	7	5	6	8	8
sp|P11217|PYGM_HUMAN	sp|P11217|PYGM_HUMAN	10	2	2	sp|P11217|PYGM_HUMAN Glycogen phosphorylase, muscle form OS=Homo sapiens OX=9606 GN=PYGM PE=1 SV=6	1	10	2	2	3	2	3	3	3	4	6	5	4	4	4	3	6	5	6	6	6	6	0	0	0	0	0	0	0	0	0	0	1	0	1	0	0	1	0	0	0	0	0	0
sp|P11233|RALA_HUMAN	sp|P11233|RALA_HUMAN	4	4	2	sp|P11233|RALA_HUMAN Ras-related protein Ral-A OS=Homo sapiens OX=9606 GN=RALA PE=1 SV=1	1	4	4	2	2	3	2	2	2	3	0	0	0	1	1	1	1	1	1	0	0	0	2	3	2	2	2	3	0	0	0	1	1	1	1	1	1	0	0	0	1	2	1	1
sp|P11234|RALB_HUMAN	sp|P11234|RALB_HUMAN	3	1	1	sp|P11234|RALB_HUMAN Ras-related protein Ral-B OS=Homo sapiens OX=9606 GN=RALB PE=1 SV=1	1	3	1	1	1	2	1	2	2	3	0	0	0	1	1	1	2	2	1	0	1	1	0	1	0	1	1	1	0	0	0	0	0	0	1	1	0	0	1	1	0	1	0	1
sp|P11277|SPTB1_HUMAN	sp|P11277|SPTB1_HUMAN	65	60	60	sp|P11277|SPTB1_HUMAN Spectrin beta chain, erythrocytic OS=Homo sapiens OX=9606 GN=SPTB PE=1 SV=5	1	65	60	60	26	23	28	18	26	20	29	25	31	26	22	20	40	37	33	34	31	36	21	20	24	15	22	17	28	24	30	25	22	20	36	33	30	30	28	32	21	20	24	15
sp|P11279|LAMP1_HUMAN	sp|P11279|LAMP1_HUMAN	4	4	4	sp|P11279|LAMP1_HUMAN Lysosome-associated membrane glycoprotein 1 OS=Homo sapiens OX=9606 GN=LAMP1 PE=1 SV=3	1	4	4	4	3	3	3	3	2	3	2	1	1	1	1	1	3	2	3	3	2	2	3	3	3	3	2	3	2	1	1	1	1	1	3	2	3	3	2	2	3	3	3	3
sp|P11310|ACADM_HUMAN	sp|P11310|ACADM_HUMAN	5	5	5	sp|P11310|ACADM_HUMAN Medium-chain specific acyl-CoA dehydrogenase, mitochondrial OS=Homo sapiens OX=9606 GN=ACADM PE=1 SV=1	1	5	5	5	3	2	2	2	3	2	2	2	1	1	0	2	4	4	3	3	4	1	3	2	2	2	3	2	2	2	1	1	0	2	4	4	3	3	4	1	3	2	2	2
sp|P11387|TOP1_HUMAN	sp|P11387|TOP1_HUMAN	4	4	4	sp|P11387|TOP1_HUMAN DNA topoisomerase 1 OS=Homo sapiens OX=9606 GN=TOP1 PE=1 SV=2	1	4	4	4	1	1	1	0	0	0	0	0	0	0	0	1	0	0	0	0	0	0	1	1	1	0	0	0	0	0	0	0	0	1	0	0	0	0	0	0	1	1	1	0
sp|P11413|G6PD_HUMAN	sp|P11413|G6PD_HUMAN	22	22	22	sp|P11413|G6PD_HUMAN Glucose-6-phosphate 1-dehydrogenase OS=Homo sapiens OX=9606 GN=G6PD PE=1 SV=4	1	22	22	22	6	6	5	6	5	7	8	12	7	6	8	7	17	18	16	17	15	19	6	6	5	6	5	7	8	12	7	6	8	7	17	18	16	17	15	19	6	6	5	6
sp|P11498|PYC_HUMAN	sp|P11498|PYC_HUMAN	3	3	3	sp|P11498|PYC_HUMAN Pyruvate carboxylase, mitochondrial OS=Homo sapiens OX=9606 GN=PC PE=1 SV=2	1	3	3	3	0	0	0	0	0	0	0	0	0	0	0	0	3	2	3	3	2	2	0	0	0	0	0	0	0	0	0	0	0	0	3	2	3	3	2	2	0	0	0	0
sp|P11586|C1TC_HUMAN	sp|P11586|C1TC_HUMAN	28	28	28	sp|P11586|C1TC_HUMAN C-1-tetrahydrofolate synthase, cytoplasmic OS=Homo sapiens OX=9606 GN=MTHFD1 PE=1 SV=4	1	28	28	28	7	8	5	7	5	6	4	4	5	5	4	5	20	21	21	20	17	23	7	8	5	7	5	6	4	4	5	5	4	5	20	21	21	20	17	23	7	8	5	7
sp|P11717|MPRI_HUMAN	sp|P11717|MPRI_HUMAN	41	41	41	sp|P11717|MPRI_HUMAN Cation-independent mannose-6-phosphate receptor OS=Homo sapiens OX=9606 GN=IGF2R PE=1 SV=3	1	41	41	41	27	31	28	30	25	29	1	0	0	0	0	0	3	4	3	3	3	3	27	31	28	30	25	29	1	0	0	0	0	0	3	4	3	3	3	3	27	31	28	30
sp|P11766|ADHX_HUMAN	sp|P11766|ADHX_HUMAN	15	15	15	sp|P11766|ADHX_HUMAN Alcohol dehydrogenase class-3 OS=Homo sapiens OX=9606 GN=ADH5 PE=1 SV=4	1	15	15	15	11	11	10	9	11	10	9	9	9	10	11	8	9	10	8	9	7	9	11	11	10	9	11	10	9	9	9	10	11	8	9	10	8	9	7	9	11	11	10	9
sp|P11908|PRPS2_HUMAN	sp|P11908|PRPS2_HUMAN	10	5	4	sp|P11908|PRPS2_HUMAN Ribose-phosphate pyrophosphokinase 2 OS=Homo sapiens OX=9606 GN=PRPS2 PE=1 SV=2	1	10	5	4	2	0	0	0	0	0	6	4	4	3	2	4	6	6	7	8	6	5	1	0	0	0	0	0	2	1	1	1	1	1	3	4	3	4	3	2	1	0	0	0
sp|P11940|PABP1_HUMAN;sp|Q9H361|PABP3_HUMAN;sp|Q4VXU2|PAP1L_HUMAN	sp|P11940|PABP1_HUMAN	19;9;4	19;9;4	12;6;1	sp|P11940|PABP1_HUMAN Polyadenylate-binding protein 1 OS=Homo sapiens OX=9606 GN=PABPC1 PE=1 SV=2	3	19	19	12	11	13	10	13	10	12	10	9	9	10	11	12	13	12	15	15	11	9	11	13	10	13	10	12	10	9	9	10	11	12	13	12	15	15	11	9	7	9	6	9
sp|P12004|PCNA_HUMAN	sp|P12004|PCNA_HUMAN	11	11	11	sp|P12004|PCNA_HUMAN Proliferating cell nuclear antigen OS=Homo sapiens OX=9606 GN=PCNA PE=1 SV=1	1	11	11	11	4	4	4	5	5	4	2	1	1	2	1	1	7	7	7	8	8	6	4	4	4	5	5	4	2	1	1	2	1	1	7	7	7	8	8	6	4	4	4	5
sp|P12035|K2C3_HUMAN;CON__P12035	sp|P12035|K2C3_HUMAN;CON__P12035	15;13	3;3	2;2	sp|P12035|K2C3_HUMAN Keratin, type II cytoskeletal 3 OS=Homo sapiens OX=9606 GN=KRT3 PE=1 SV=3;	2	15	3	2	8	8	9	9	9	9	10	10	9	8	10	9	10	11	11	11	11	12	1	1	1	1	1	1	0	1	1	0	1	0	1	1	1	1	2	2	0	0	0	0
sp|P12081|HARS1_HUMAN	sp|P12081|HARS1_HUMAN	10	10	7	sp|P12081|HARS1_HUMAN Histidine--tRNA ligase, cytoplasmic OS=Homo sapiens OX=9606 GN=HARS1 PE=1 SV=2	1	10	10	7	6	6	8	7	6	8	1	0	0	0	0	0	5	5	5	7	5	4	6	6	8	7	6	8	1	0	0	0	0	0	5	5	5	7	5	4	5	4	5	5
sp|P12109|CO6A1_HUMAN	sp|P12109|CO6A1_HUMAN	25	25	25	sp|P12109|CO6A1_HUMAN Collagen alpha-1(VI) chain OS=Homo sapiens OX=9606 GN=COL6A1 PE=1 SV=3	1	25	25	25	11	11	10	9	7	10	21	23	19	22	22	21	4	6	3	3	3	3	11	11	10	9	7	10	21	23	19	22	22	21	4	6	3	3	3	3	11	11	10	9
sp|P12110|CO6A2_HUMAN	sp|P12110|CO6A2_HUMAN	21	21	21	sp|P12110|CO6A2_HUMAN Collagen alpha-2(VI) chain OS=Homo sapiens OX=9606 GN=COL6A2 PE=1 SV=4	1	21	21	21	6	8	6	7	8	8	19	19	18	18	19	19	0	0	0	1	1	1	6	8	6	7	8	8	19	19	18	18	19	19	0	0	0	1	1	1	6	8	6	7
sp|P12111|CO6A3_HUMAN	sp|P12111|CO6A3_HUMAN	89	89	89	sp|P12111|CO6A3_HUMAN Collagen alpha-3(VI) chain OS=Homo sapiens OX=9606 GN=COL6A3 PE=1 SV=5	1	89	89	89	30	33	28	30	33	36	70	74	76	74	76	76	21	24	25	17	25	25	30	33	28	30	33	36	70	74	76	74	76	76	21	24	25	17	25	25	30	33	28	30
sp|P12235|ADT1_HUMAN	sp|P12235|ADT1_HUMAN	14	4	4	sp|P12235|ADT1_HUMAN ADP/ATP translocase 1 OS=Homo sapiens OX=9606 GN=SLC25A4 PE=1 SV=4	1	14	4	4	9	9	11	10	10	8	7	6	8	7	7	7	5	8	5	7	5	5	3	3	4	3	3	3	1	0	1	2	0	1	1	2	0	1	1	0	3	3	4	3
sp|P12236|ADT3_HUMAN	sp|P12236|ADT3_HUMAN	16	16	4	sp|P12236|ADT3_HUMAN ADP/ATP translocase 3 OS=Homo sapiens OX=9606 GN=SLC25A6 PE=1 SV=4	1	16	16	4	10	11	11	12	10	10	10	8	10	8	10	8	9	10	10	12	10	10	10	11	11	12	10	10	10	8	10	8	10	8	9	10	10	12	10	10	3	3	3	3
sp|P12268|IMDH2_HUMAN	sp|P12268|IMDH2_HUMAN	17	17	17	sp|P12268|IMDH2_HUMAN Inosine-5-monophosphate dehydrogenase 2 OS=Homo sapiens OX=9606 GN=IMPDH2 PE=1 SV=2	1	17	17	17	10	10	10	10	11	9	8	8	9	8	8	6	10	8	9	8	11	9	10	10	10	10	11	9	8	8	9	8	8	6	10	8	9	8	11	9	10	10	10	10
sp|P12270|TPR_HUMAN	sp|P12270|TPR_HUMAN	37	37	37	sp|P12270|TPR_HUMAN Nucleoprotein TPR OS=Homo sapiens OX=9606 GN=TPR PE=1 SV=3	1	37	37	37	13	18	17	20	19	16	2	2	1	2	4	3	18	20	23	18	20	19	13	18	17	20	19	16	2	2	1	2	4	3	18	20	23	18	20	19	13	18	17	20
sp|P12277|KCRB_HUMAN;sp|P06732|KCRM_HUMAN	sp|P12277|KCRB_HUMAN	18;2	18;2	18;2	sp|P12277|KCRB_HUMAN Creatine kinase B-type OS=Homo sapiens OX=9606 GN=CKB PE=1 SV=1	2	18	18	18	14	13	13	15	12	13	11	12	12	11	13	12	3	6	4	4	3	3	14	13	13	15	12	13	11	12	12	11	13	12	3	6	4	4	3	3	14	13	13	15
sp|P12318|FCG2A_HUMAN	sp|P12318|FCG2A_HUMAN	1	1	1	sp|P12318|FCG2A_HUMAN Low affinity immunoglobulin gamma Fc region receptor II-a OS=Homo sapiens OX=9606 GN=FCGR2A PE=1 SV=4	1	1	1	1	1	0	0	1	1	0	0	0	0	0	0	0	0	0	0	0	0	0	1	0	0	1	1	0	0	0	0	0	0	0	0	0	0	0	0	0	1	0	0	1
sp|P12429|ANXA3_HUMAN	sp|P12429|ANXA3_HUMAN	17	17	17	sp|P12429|ANXA3_HUMAN Annexin A3 OS=Homo sapiens OX=9606 GN=ANXA3 PE=1 SV=3	1	17	17	17	12	11	12	13	12	14	2	1	1	1	1	1	3	3	5	4	5	6	12	11	12	13	12	14	2	1	1	1	1	1	3	3	5	4	5	6	12	11	12	13
sp|P12532|KCRU_HUMAN	sp|P12532|KCRU_HUMAN	9	9	7	sp|P12532|KCRU_HUMAN Creatine kinase U-type, mitochondrial OS=Homo sapiens OX=9606 GN=CKMT1A PE=1 SV=1	1	9	9	7	5	3	3	3	2	4	3	4	4	4	5	5	6	6	7	7	7	6	5	3	3	3	2	4	3	4	4	4	5	5	6	6	7	7	7	6	4	2	2	2
sp|P12694|ODBA_HUMAN	sp|P12694|ODBA_HUMAN	3	3	3	sp|P12694|ODBA_HUMAN 2-oxoisovalerate dehydrogenase subunit alpha, mitochondrial OS=Homo sapiens OX=9606 GN=BCKDHA PE=1 SV=2	1	3	3	3	0	0	0	1	0	1	0	1	1	0	1	1	1	1	1	0	1	1	0	0	0	1	0	1	0	1	1	0	1	1	1	1	1	0	1	1	0	0	0	1
sp|P12814|ACTN1_HUMAN;sp|P35609|ACTN2_HUMAN	sp|P12814|ACTN1_HUMAN	56;15	38;5	35;2	sp|P12814|ACTN1_HUMAN Alpha-actinin-1 OS=Homo sapiens OX=9606 GN=ACTN1 PE=1 SV=2	2	56	38	35	43	45	45	45	44	45	39	38	37	41	38	38	51	49	48	49	48	47	30	32	32	31	31	32	23	24	22	25	25	23	36	34	33	35	33	34	28	30	30	29
sp|P12821|ACE_HUMAN	sp|P12821|ACE_HUMAN	4	4	4	sp|P12821|ACE_HUMAN Angiotensin-converting enzyme OS=Homo sapiens OX=9606 GN=ACE PE=1 SV=1	1	4	4	4	0	0	0	0	0	1	3	3	3	3	2	2	0	0	0	0	0	0	0	0	0	0	0	1	3	3	3	3	2	2	0	0	0	0	0	0	0	0	0	0
sp|P12830|CADH1_HUMAN	sp|P12830|CADH1_HUMAN	15	15	14	sp|P12830|CADH1_HUMAN Cadherin-1 OS=Homo sapiens OX=9606 GN=CDH1 PE=1 SV=3	1	15	15	14	8	8	8	7	8	9	5	4	5	6	5	7	9	8	9	11	10	10	8	8	8	7	8	9	5	4	5	6	5	7	9	8	9	11	10	10	7	7	7	6
sp|P12838|DEF4_HUMAN	sp|P12838|DEF4_HUMAN	1	1	1	sp|P12838|DEF4_HUMAN Neutrophil defensin 4 OS=Homo sapiens OX=9606 GN=DEFA4 PE=1 SV=2	1	1	1	1	1	1	1	1	1	1	1	1	1	0	1	1	1	1	1	1	1	1	1	1	1	1	1	1	1	1	1	0	1	1	1	1	1	1	1	1	1	1	1	1
sp|P12931|SRC_HUMAN	sp|P12931|SRC_HUMAN	3	2	2	sp|P12931|SRC_HUMAN Proto-oncogene tyrosine-protein kinase Src OS=Homo sapiens OX=9606 GN=SRC PE=1 SV=3	1	3	2	2	0	0	0	0	0	1	0	0	0	1	0	0	0	0	1	3	0	0	0	0	0	0	0	1	0	0	0	0	0	0	0	0	1	2	0	0	0	0	0	0
sp|P12955|PEPD_HUMAN	sp|P12955|PEPD_HUMAN	8	8	8	sp|P12955|PEPD_HUMAN Xaa-Pro dipeptidase OS=Homo sapiens OX=9606 GN=PEPD PE=1 SV=3	1	8	8	8	4	2	2	3	2	4	3	2	2	3	1	3	4	4	5	2	3	3	4	2	2	3	2	4	3	2	2	3	1	3	4	4	5	2	3	3	4	2	2	3
sp|P12956|XRCC6_HUMAN	sp|P12956|XRCC6_HUMAN	26	26	26	sp|P12956|XRCC6_HUMAN X-ray repair cross-complementing protein 6 OS=Homo sapiens OX=9606 GN=XRCC6 PE=1 SV=2	1	26	26	26	12	15	13	13	15	14	10	11	11	11	12	10	18	18	16	18	17	18	12	15	13	13	15	14	10	11	11	11	12	10	18	18	16	18	17	18	12	15	13	13
sp|P13010|XRCC5_HUMAN	sp|P13010|XRCC5_HUMAN	24	24	24	sp|P13010|XRCC5_HUMAN X-ray repair cross-complementing protein 5 OS=Homo sapiens OX=9606 GN=XRCC5 PE=1 SV=3	1	24	24	24	16	16	16	15	16	15	11	12	14	13	10	11	19	17	17	19	20	19	16	16	16	15	16	15	11	12	14	13	10	11	19	17	17	19	20	19	16	16	16	15
sp|P13073|COX41_HUMAN	sp|P13073|COX41_HUMAN	6	6	6	sp|P13073|COX41_HUMAN Cytochrome c oxidase subunit 4 isoform 1, mitochondrial OS=Homo sapiens OX=9606 GN=COX4I1 PE=1 SV=1	1	6	6	6	5	5	5	5	5	5	2	3	3	2	3	3	4	4	5	5	4	5	5	5	5	5	5	5	2	3	3	2	3	3	4	4	5	5	4	5	5	5	5	5
sp|P13284|GILT_HUMAN	sp|P13284|GILT_HUMAN	2	2	2	sp|P13284|GILT_HUMAN Gamma-interferon-inducible lysosomal thiol reductase OS=Homo sapiens OX=9606 GN=IFI30 PE=1 SV=3	1	2	2	2	0	1	2	2	0	1	0	0	1	0	0	0	1	1	2	1	2	1	0	1	2	2	0	1	0	0	1	0	0	0	1	1	2	1	2	1	0	1	2	2
sp|P13473|LAMP2_HUMAN	sp|P13473|LAMP2_HUMAN	6	6	6	sp|P13473|LAMP2_HUMAN Lysosome-associated membrane glycoprotein 2 OS=Homo sapiens OX=9606 GN=LAMP2 PE=1 SV=2	1	6	6	6	3	4	4	3	4	4	1	2	2	2	1	2	4	2	3	3	2	3	3	4	4	3	4	4	1	2	2	2	1	2	4	2	3	3	2	3	3	4	4	3
sp|P13489|RINI_HUMAN	sp|P13489|RINI_HUMAN	18	18	18	sp|P13489|RINI_HUMAN Ribonuclease inhibitor OS=Homo sapiens OX=9606 GN=RNH1 PE=1 SV=2	1	18	18	18	15	15	15	14	16	14	13	13	13	13	16	14	16	18	16	16	16	18	15	15	15	14	16	14	13	13	13	13	16	14	16	18	16	16	16	18	15	15	15	14
sp|P13498|CY24A_HUMAN	sp|P13498|CY24A_HUMAN	2	2	2	sp|P13498|CY24A_HUMAN Cytochrome b-245 light chain OS=Homo sapiens OX=9606 GN=CYBA PE=1 SV=3	1	2	2	2	1	1	1	2	1	1	0	0	0	0	0	0	1	1	1	1	1	1	1	1	1	2	1	1	0	0	0	0	0	0	1	1	1	1	1	1	1	1	1	2
sp|P13591|NCAM1_HUMAN	sp|P13591|NCAM1_HUMAN	5	5	5	sp|P13591|NCAM1_HUMAN Neural cell adhesion molecule 1 OS=Homo sapiens OX=9606 GN=NCAM1 PE=1 SV=3	1	5	5	5	0	0	2	1	0	0	1	3	3	3	3	2	0	0	0	0	0	0	0	0	2	1	0	0	1	3	3	3	3	2	0	0	0	0	0	0	0	0	2	1
sp|P13611|CSPG2_HUMAN	sp|P13611|CSPG2_HUMAN	12	12	12	sp|P13611|CSPG2_HUMAN Versican core protein OS=Homo sapiens OX=9606 GN=VCAN PE=1 SV=3	1	12	12	12	2	2	2	2	2	1	6	6	6	6	6	7	4	4	5	5	5	4	2	2	2	2	2	1	6	6	6	6	6	7	4	4	5	5	5	4	2	2	2	2
sp|P13639|EF2_HUMAN	sp|P13639|EF2_HUMAN	44	44	43	sp|P13639|EF2_HUMAN Elongation factor 2 OS=Homo sapiens OX=9606 GN=EEF2 PE=1 SV=4	1	44	44	43	34	34	32	32	29	35	27	28	31	29	30	28	39	36	37	38	36	40	34	34	32	32	29	35	27	28	31	29	30	28	39	36	37	38	36	40	34	33	32	32
sp|P13645|K1C10_HUMAN;CON__P13645;sp|Q7Z3Y7|K1C28_HUMAN;CON__Q148H6;CON__Q7Z3Y7;sp|Q7Z3Z0|K1C25_HUMAN;CON__Q7Z3Z0;sp|Q7Z3Y8|K1C27_HUMAN;CON__Q7Z3Y8	sp|P13645|K1C10_HUMAN;CON__P13645	28;28;3;3;3;2;2;2;2	23;23;1;1;1;1;1;1;1	18;18;1;1;1;1;1;1;1	sp|P13645|K1C10_HUMAN Keratin, type I cytoskeletal 10 OS=Homo sapiens OX=9606 GN=KRT10 PE=1 SV=6;	9	28	23	18	23	20	22	22	24	20	17	17	17	16	13	13	5	6	6	5	6	6	18	15	17	18	20	16	12	13	13	12	10	10	1	1	1	0	1	1	13	12	12	14
sp|P13647|K2C5_HUMAN;CON__P13647	sp|P13647|K2C5_HUMAN;CON__P13647	55;55	55;55	11;11	sp|P13647|K2C5_HUMAN Keratin, type II cytoskeletal 5 OS=Homo sapiens OX=9606 GN=KRT5 PE=1 SV=3;	2	55	55	11	30	32	29	28	30	30	39	42	44	41	45	44	50	48	50	48	51	49	30	32	29	28	30	30	39	42	44	41	45	44	50	48	50	48	51	49	5	6	5	5
sp|P13667|PDIA4_HUMAN	sp|P13667|PDIA4_HUMAN	34	33	33	sp|P13667|PDIA4_HUMAN Protein disulfide-isomerase A4 OS=Homo sapiens OX=9606 GN=PDIA4 PE=1 SV=2	1	34	33	33	29	29	31	30	30	29	13	14	13	11	10	13	22	25	24	26	24	25	28	28	30	29	29	28	13	14	13	11	10	13	22	24	24	25	24	24	28	28	30	29
sp|P13671|CO6_HUMAN	sp|P13671|CO6_HUMAN	6	6	6	sp|P13671|CO6_HUMAN Complement component C6 OS=Homo sapiens OX=9606 GN=C6 PE=1 SV=3	1	6	6	6	2	3	1	2	3	1	1	0	3	2	2	2	1	3	3	3	1	2	2	3	1	2	3	1	1	0	3	2	2	2	1	3	3	3	1	2	2	3	1	2
sp|P13674|P4HA1_HUMAN	sp|P13674|P4HA1_HUMAN	14	14	14	sp|P13674|P4HA1_HUMAN Prolyl 4-hydroxylase subunit alpha-1 OS=Homo sapiens OX=9606 GN=P4HA1 PE=1 SV=2	1	14	14	14	7	7	7	8	7	10	1	0	1	1	1	1	3	3	2	2	5	4	7	7	7	8	7	10	1	0	1	1	1	1	3	3	2	2	5	4	7	7	7	8
sp|P13693|TCTP_HUMAN;sp|Q56UQ5|TPT1L_HUMAN;sp|Q9HAU6|TCTP8_HUMAN	sp|P13693|TCTP_HUMAN	6;2;1	6;2;1	6;2;1	sp|P13693|TCTP_HUMAN Translationally-controlled tumor protein OS=Homo sapiens OX=9606 GN=TPT1 PE=1 SV=1	3	6	6	6	3	4	5	4	5	5	3	5	4	5	4	4	4	3	6	6	3	4	3	4	5	4	5	5	3	5	4	5	4	4	4	3	6	6	3	4	3	4	5	4
sp|P13716|HEM2_HUMAN	sp|P13716|HEM2_HUMAN	12	12	12	sp|P13716|HEM2_HUMAN Delta-aminolevulinic acid dehydratase OS=Homo sapiens OX=9606 GN=ALAD PE=1 SV=1	1	12	12	12	8	8	6	5	4	6	6	7	5	4	5	7	4	5	5	6	6	6	8	8	6	5	4	6	6	7	5	4	5	7	4	5	5	6	6	6	8	8	6	5
sp|P13727|PRG2_HUMAN	sp|P13727|PRG2_HUMAN	1	1	1	sp|P13727|PRG2_HUMAN Bone marrow proteoglycan OS=Homo sapiens OX=9606 GN=PRG2 PE=1 SV=2	1	1	1	1	0	0	0	0	0	0	0	1	0	1	0	0	0	0	0	0	0	0	0	0	0	0	0	0	0	1	0	1	0	0	0	0	0	0	0	0	0	0	0	0
sp|P13762|DRB4_HUMAN	sp|P13762|DRB4_HUMAN	4	4	4	sp|P13762|DRB4_HUMAN HLA class II histocompatibility antigen, DR beta 4 chain OS=Homo sapiens OX=9606 GN=HLA-DRB4 PE=1 SV=2	1	4	4	4	3	3	2	3	1	3	0	0	0	0	0	0	0	0	2	0	1	0	3	3	2	3	1	3	0	0	0	0	0	0	0	0	2	0	1	0	3	3	2	3
sp|P13796|PLSL_HUMAN	sp|P13796|PLSL_HUMAN	32	32	24	sp|P13796|PLSL_HUMAN Plastin-2 OS=Homo sapiens OX=9606 GN=LCP1 PE=1 SV=6	1	32	32	24	23	22	23	22	22	20	21	19	18	19	21	18	27	28	27	26	28	27	23	22	23	22	22	20	21	19	18	19	21	18	27	28	27	26	28	27	18	17	19	18
sp|P13797|PLST_HUMAN	sp|P13797|PLST_HUMAN	30	22	20	sp|P13797|PLST_HUMAN Plastin-3 OS=Homo sapiens OX=9606 GN=PLS3 PE=1 SV=4	1	30	22	20	11	10	11	9	9	9	17	14	13	15	18	11	22	22	24	21	22	19	6	5	7	5	3	5	12	10	10	12	12	8	15	14	18	14	15	14	6	5	6	5
sp|P13798|ACPH_HUMAN	sp|P13798|ACPH_HUMAN	13	13	13	sp|P13798|ACPH_HUMAN Acylamino-acid-releasing enzyme OS=Homo sapiens OX=9606 GN=APEH PE=1 SV=4	1	13	13	13	10	7	7	8	6	7	3	5	4	5	6	4	7	4	6	7	6	5	10	7	7	8	6	7	3	5	4	5	6	4	7	4	6	7	6	5	10	7	7	8
sp|P13804|ETFA_HUMAN	sp|P13804|ETFA_HUMAN	11	11	11	sp|P13804|ETFA_HUMAN Electron transfer flavoprotein subunit alpha, mitochondrial OS=Homo sapiens OX=9606 GN=ETFA PE=1 SV=1	1	11	11	11	7	8	7	7	7	7	7	8	7	7	7	8	10	10	10	10	10	10	7	8	7	7	7	7	7	8	7	7	7	8	10	10	10	10	10	10	7	8	7	7
sp|P13807|GYS1_HUMAN	sp|P13807|GYS1_HUMAN	5	5	5	sp|P13807|GYS1_HUMAN Glycogen [starch] synthase, muscle OS=Homo sapiens OX=9606 GN=GYS1 PE=1 SV=2	1	5	5	5	2	2	2	2	2	2	0	0	0	1	0	0	3	3	4	3	3	2	2	2	2	2	2	2	0	0	0	1	0	0	3	3	4	3	3	2	2	2	2	2
sp|P13861|KAP2_HUMAN	sp|P13861|KAP2_HUMAN	7	7	5	sp|P13861|KAP2_HUMAN cAMP-dependent protein kinase type II-alpha regulatory subunit OS=Homo sapiens OX=9606 GN=PRKAR2A PE=1 SV=2	1	7	7	5	4	5	4	4	4	4	2	2	3	2	4	3	4	4	4	4	3	4	4	5	4	4	4	4	2	2	3	2	4	3	4	4	4	4	3	4	3	4	3	3
sp|P13928|ANXA8_HUMAN	sp|P13928|ANXA8_HUMAN	17	2	2	sp|P13928|ANXA8_HUMAN Annexin A8 OS=Homo sapiens OX=9606 GN=ANXA8 PE=1 SV=3	1	17	2	2	0	2	0	1	2	2	4	3	3	2	3	3	10	12	10	8	11	10	0	0	0	0	0	0	1	0	0	0	0	0	0	0	1	1	0	0	0	0	0	0
sp|P13987|CD59_HUMAN	sp|P13987|CD59_HUMAN	4	4	4	sp|P13987|CD59_HUMAN CD59 glycoprotein OS=Homo sapiens OX=9606 GN=CD59 PE=1 SV=1	1	4	4	4	2	2	3	2	2	2	3	3	3	3	3	3	4	3	4	4	3	3	2	2	3	2	2	2	3	3	3	3	3	3	4	3	4	4	3	3	2	2	3	2
sp|P14174|MIF_HUMAN	sp|P14174|MIF_HUMAN	3	3	3	sp|P14174|MIF_HUMAN Macrophage migration inhibitory factor OS=Homo sapiens OX=9606 GN=MIF PE=1 SV=4	1	3	3	3	3	3	3	3	3	3	2	2	2	2	2	2	3	3	3	3	3	3	3	3	3	3	3	3	2	2	2	2	2	2	3	3	3	3	3	3	3	3	3	3
sp|P14209|CD99_HUMAN	sp|P14209|CD99_HUMAN	1	1	1	sp|P14209|CD99_HUMAN CD99 antigen OS=Homo sapiens OX=9606 GN=CD99 PE=1 SV=1	1	1	1	1	1	1	1	1	1	1	1	0	0	0	0	0	1	1	1	1	1	1	1	1	1	1	1	1	1	0	0	0	0	0	1	1	1	1	1	1	1	1	1	1
sp|P14314|GLU2B_HUMAN	sp|P14314|GLU2B_HUMAN	17	17	17	sp|P14314|GLU2B_HUMAN Glucosidase 2 subunit beta OS=Homo sapiens OX=9606 GN=PRKCSH PE=1 SV=2	1	17	17	17	11	12	11	10	11	11	5	6	5	5	8	4	12	13	9	11	12	11	11	12	11	10	11	11	5	6	5	5	8	4	12	13	9	11	12	11	11	12	11	10
sp|P14317|HCLS1_HUMAN	sp|P14317|HCLS1_HUMAN	3	3	3	sp|P14317|HCLS1_HUMAN Hematopoietic lineage cell-specific protein OS=Homo sapiens OX=9606 GN=HCLS1 PE=1 SV=3	1	3	3	3	0	1	1	0	1	1	1	1	1	1	0	1	2	2	2	2	2	2	0	1	1	0	1	1	1	1	1	1	0	1	2	2	2	2	2	2	0	1	1	0
sp|P14324|FPPS_HUMAN	sp|P14324|FPPS_HUMAN	5	5	5	sp|P14324|FPPS_HUMAN Farnesyl pyrophosphate synthase OS=Homo sapiens OX=9606 GN=FDPS PE=1 SV=4	1	5	5	5	1	1	1	1	0	1	0	0	0	0	0	0	4	3	3	4	2	3	1	1	1	1	0	1	0	0	0	0	0	0	4	3	3	4	2	3	1	1	1	1
sp|P14406|CX7A2_HUMAN	sp|P14406|CX7A2_HUMAN	2	2	2	sp|P14406|CX7A2_HUMAN Cytochrome c oxidase subunit 7A2, mitochondrial OS=Homo sapiens OX=9606 GN=COX7A2 PE=1 SV=1	1	2	2	2	2	2	2	2	2	2	1	2	2	2	2	2	1	1	0	1	2	2	2	2	2	2	2	2	1	2	2	2	2	2	1	1	0	1	2	2	2	2	2	2
sp|P14543|NID1_HUMAN	sp|P14543|NID1_HUMAN	23	23	22	sp|P14543|NID1_HUMAN Nidogen-1 OS=Homo sapiens OX=9606 GN=NID1 PE=1 SV=3	1	23	23	22	10	11	9	8	8	10	12	12	13	13	13	12	10	10	10	11	10	10	10	11	9	8	8	10	12	12	13	13	13	12	10	10	10	11	10	10	10	11	9	8
sp|P14550|AK1A1_HUMAN	sp|P14550|AK1A1_HUMAN	15	15	15	sp|P14550|AK1A1_HUMAN Aldo-keto reductase family 1 member A1 OS=Homo sapiens OX=9606 GN=AKR1A1 PE=1 SV=3	1	15	15	15	8	6	9	8	8	7	5	7	3	8	6	7	8	8	9	8	8	9	8	6	9	8	8	7	5	7	3	8	6	7	8	8	9	8	8	9	8	6	9	8
sp|P14618|KPYM_HUMAN;sp|P30613|KPYR_HUMAN	sp|P14618|KPYM_HUMAN	46;1	46;1	46;1	sp|P14618|KPYM_HUMAN Pyruvate kinase PKM OS=Homo sapiens OX=9606 GN=PKM PE=1 SV=4	2	46	46	46	40	39	37	38	37	38	30	28	33	30	34	30	40	38	41	40	42	41	40	39	37	38	37	38	30	28	33	30	34	30	40	38	41	40	42	41	40	39	37	38
sp|P14625|ENPL_HUMAN;sp|Q58FF3|ENPLL_HUMAN	sp|P14625|ENPL_HUMAN	41;4	41;4	39;4	sp|P14625|ENPL_HUMAN Endoplasmin OS=Homo sapiens OX=9606 GN=HSP90B1 PE=1 SV=1	2	41	41	39	34	37	38	37	36	34	18	19	20	23	20	22	34	33	31	32	33	32	34	37	38	37	36	34	18	19	20	23	20	22	34	33	31	32	33	32	32	35	36	35
sp|P14649|MYL6B_HUMAN	sp|P14649|MYL6B_HUMAN	3	1	1	sp|P14649|MYL6B_HUMAN Myosin light chain 6B OS=Homo sapiens OX=9606 GN=MYL6B PE=1 SV=1	1	3	1	1	2	2	2	2	3	2	2	2	2	2	2	2	2	2	2	2	2	2	0	0	0	0	1	0	0	0	0	0	0	0	0	0	0	0	0	0	0	0	0	0
sp|P14735|IDE_HUMAN	sp|P14735|IDE_HUMAN	7	7	7	sp|P14735|IDE_HUMAN Insulin-degrading enzyme OS=Homo sapiens OX=9606 GN=IDE PE=1 SV=4	1	7	7	7	3	4	4	3	3	3	1	0	1	0	0	1	2	3	2	2	3	2	3	4	4	3	3	3	1	0	1	0	0	1	2	3	2	2	3	2	3	4	4	3
sp|P14770|GPIX_HUMAN	sp|P14770|GPIX_HUMAN	1	1	1	sp|P14770|GPIX_HUMAN Platelet glycoprotein IX OS=Homo sapiens OX=9606 GN=GP9 PE=1 SV=3	1	1	1	1	1	1	0	1	1	1	0	0	0	0	0	0	0	0	0	0	0	0	1	1	0	1	1	1	0	0	0	0	0	0	0	0	0	0	0	0	1	1	0	1
sp|P14780|MMP9_HUMAN	sp|P14780|MMP9_HUMAN	5	5	5	sp|P14780|MMP9_HUMAN Matrix metalloproteinase-9 OS=Homo sapiens OX=9606 GN=MMP9 PE=1 SV=3	1	5	5	5	3	2	2	2	2	2	0	0	0	0	0	1	0	1	2	2	0	1	3	2	2	2	2	2	0	0	0	0	0	1	0	1	2	2	0	1	3	2	2	2
sp|P14854|CX6B1_HUMAN	sp|P14854|CX6B1_HUMAN	4	4	4	sp|P14854|CX6B1_HUMAN Cytochrome c oxidase subunit 6B1 OS=Homo sapiens OX=9606 GN=COX6B1 PE=1 SV=2	1	4	4	4	2	2	2	3	3	1	3	3	3	3	3	3	2	3	3	2	3	2	2	2	2	3	3	1	3	3	3	3	3	3	2	3	3	2	3	2	2	2	2	3
sp|P14866|HNRPL_HUMAN	sp|P14866|HNRPL_HUMAN	15	15	14	sp|P14866|HNRPL_HUMAN Heterogeneous nuclear ribonucleoprotein L OS=Homo sapiens OX=9606 GN=HNRNPL PE=1 SV=2	1	15	15	14	8	10	11	8	11	8	5	6	6	6	5	6	13	11	11	11	11	12	8	10	11	8	11	8	5	6	6	6	5	6	13	11	11	11	11	12	8	10	11	8
sp|P14868|SYDC_HUMAN	sp|P14868|SYDC_HUMAN	17	17	17	sp|P14868|SYDC_HUMAN Aspartate--tRNA ligase, cytoplasmic OS=Homo sapiens OX=9606 GN=DARS1 PE=1 SV=2	1	17	17	17	10	11	10	11	11	8	8	7	6	7	5	5	10	11	12	12	10	9	10	11	10	11	11	8	8	7	6	7	5	5	10	11	12	12	10	9	10	11	10	11
sp|P14923|PLAK_HUMAN	sp|P14923|PLAK_HUMAN	43	43	38	sp|P14923|PLAK_HUMAN Junction plakoglobin OS=Homo sapiens OX=9606 GN=JUP PE=1 SV=3	1	43	43	38	19	21	20	20	21	17	30	28	31	30	28	29	40	40	40	39	40	40	19	21	20	20	21	17	30	28	31	30	28	29	40	40	40	39	40	40	17	18	18	17
sp|P14927|QCR7_HUMAN	sp|P14927|QCR7_HUMAN	3	3	3	sp|P14927|QCR7_HUMAN Cytochrome b-c1 complex subunit 7 OS=Homo sapiens OX=9606 GN=UQCRB PE=1 SV=2	1	3	3	3	2	2	1	2	2	2	2	2	2	2	2	2	2	1	2	2	1	2	2	2	1	2	2	2	2	2	2	2	2	2	2	1	2	2	1	2	2	2	1	2
sp|P15088|CBPA3_HUMAN	sp|P15088|CBPA3_HUMAN	7	7	7	sp|P15088|CBPA3_HUMAN Mast cell carboxypeptidase A OS=Homo sapiens OX=9606 GN=CPA3 PE=1 SV=2	1	7	7	7	0	0	0	0	0	0	7	7	7	6	7	6	0	0	0	1	0	0	0	0	0	0	0	0	7	7	7	6	7	6	0	0	0	1	0	0	0	0	0	0
sp|P15090|FABP4_HUMAN;sp|P02689|MYP2_HUMAN	sp|P15090|FABP4_HUMAN	11;1	11;1	11;1	sp|P15090|FABP4_HUMAN Fatty acid-binding protein, adipocyte OS=Homo sapiens OX=9606 GN=FABP4 PE=1 SV=3	2	11	11	11	6	6	5	5	5	6	3	2	7	5	5	4	11	11	11	11	11	11	6	6	5	5	5	6	3	2	7	5	5	4	11	11	11	11	11	11	6	6	5	5
sp|P15104|GLNA_HUMAN	sp|P15104|GLNA_HUMAN	6	6	6	sp|P15104|GLNA_HUMAN Glutamine synthetase OS=Homo sapiens OX=9606 GN=GLUL PE=1 SV=4	1	6	6	6	2	2	3	3	2	2	1	1	3	0	2	1	2	2	4	3	3	2	2	2	3	3	2	2	1	1	3	0	2	1	2	2	4	3	3	2	2	2	3	3
sp|P15121|ALDR_HUMAN	sp|P15121|ALDR_HUMAN	11	11	10	sp|P15121|ALDR_HUMAN Aldo-keto reductase family 1 member B1 OS=Homo sapiens OX=9606 GN=AKR1B1 PE=1 SV=3	1	11	11	10	3	4	5	6	5	6	9	8	8	7	7	7	5	5	5	5	5	4	3	4	5	6	5	6	9	8	8	7	7	7	5	5	5	5	5	4	3	4	5	6
sp|P15144|AMPN_HUMAN	sp|P15144|AMPN_HUMAN	11	11	11	sp|P15144|AMPN_HUMAN Aminopeptidase N OS=Homo sapiens OX=9606 GN=ANPEP PE=1 SV=4	1	11	11	11	3	0	2	2	2	2	3	4	3	5	3	4	2	3	2	3	2	2	3	0	2	2	2	2	3	4	3	5	3	4	2	3	2	3	2	2	3	0	2	2
sp|P15153|RAC2_HUMAN	sp|P15153|RAC2_HUMAN	6	1	1	sp|P15153|RAC2_HUMAN Ras-related C3 botulinum toxin substrate 2 OS=Homo sapiens OX=9606 GN=RAC2 PE=1 SV=1	1	6	1	1	4	3	4	5	5	4	3	2	3	2	1	2	4	5	5	5	5	6	1	1	1	1	1	1	1	0	0	0	0	0	1	1	1	1	1	1	1	1	1	1
sp|P15169|CBPN_HUMAN;CON__Q2KJ83	sp|P15169|CBPN_HUMAN;CON__Q2KJ83	1;1	1;1	1;1	sp|P15169|CBPN_HUMAN Carboxypeptidase N catalytic chain OS=Homo sapiens OX=9606 GN=CPN1 PE=1 SV=1;	2	1	1	1	0	0	0	0	0	0	1	1	1	1	1	0	0	0	0	0	0	0	0	0	0	0	0	0	1	1	1	1	1	0	0	0	0	0	0	0	0	0	0	0
sp|P15170|ERF3A_HUMAN	sp|P15170|ERF3A_HUMAN	13	13	5	sp|P15170|ERF3A_HUMAN Eukaryotic peptide chain release factor GTP-binding subunit ERF3A OS=Homo sapiens OX=9606 GN=GSPT1 PE=1 SV=1	1	13	13	5	3	3	5	5	6	4	1	1	1	1	1	0	6	6	4	4	8	5	3	3	5	5	6	4	1	1	1	1	1	0	6	6	4	4	8	5	1	1	2	1
sp|P15289|ARSA_HUMAN	sp|P15289|ARSA_HUMAN	7	7	7	sp|P15289|ARSA_HUMAN Arylsulfatase A OS=Homo sapiens OX=9606 GN=ARSA PE=1 SV=3	1	7	7	7	7	6	6	6	5	6	2	4	3	2	1	3	2	1	1	3	1	1	7	6	6	6	5	6	2	4	3	2	1	3	2	1	1	3	1	1	7	6	6	6
sp|P15291|B4GT1_HUMAN	sp|P15291|B4GT1_HUMAN	3	3	3	sp|P15291|B4GT1_HUMAN Beta-1,4-galactosyltransferase 1 OS=Homo sapiens OX=9606 GN=B4GALT1 PE=1 SV=5	1	3	3	3	2	2	3	2	2	0	0	0	0	0	0	0	0	0	1	2	1	1	2	2	3	2	2	0	0	0	0	0	0	0	0	0	1	2	1	1	2	2	3	2
sp|P15309|PPAP_HUMAN	sp|P15309|PPAP_HUMAN	1	1	1	sp|P15309|PPAP_HUMAN Prostatic acid phosphatase OS=Homo sapiens OX=9606 GN=ACP3 PE=1 SV=3	1	1	1	1	1	0	1	1	1	1	1	1	1	1	1	0	1	0	0	0	0	1	1	0	1	1	1	1	1	1	1	1	1	0	1	0	0	0	0	1	1	0	1	1
sp|P15311|EZRI_HUMAN	sp|P15311|EZRI_HUMAN	36	25	23	sp|P15311|EZRI_HUMAN Ezrin OS=Homo sapiens OX=9606 GN=EZR PE=1 SV=4	1	36	25	23	23	22	21	23	19	20	15	18	15	18	17	15	26	30	30	28	27	27	16	15	13	16	12	12	7	8	8	9	7	7	16	20	19	17	16	16	16	14	12	15
sp|P15374|UCHL3_HUMAN	sp|P15374|UCHL3_HUMAN	7	7	7	sp|P15374|UCHL3_HUMAN Ubiquitin carboxyl-terminal hydrolase isozyme L3 OS=Homo sapiens OX=9606 GN=UCHL3 PE=1 SV=1	1	7	7	7	5	5	4	6	6	6	3	2	3	3	3	3	6	6	6	5	6	6	5	5	4	6	6	6	3	2	3	3	3	3	6	6	6	5	6	6	5	5	4	6
sp|P15502|ELN_HUMAN	sp|P15502|ELN_HUMAN	4	4	4	sp|P15502|ELN_HUMAN Elastin OS=Homo sapiens OX=9606 GN=ELN PE=1 SV=4	1	4	4	4	0	0	0	0	0	0	3	4	4	4	4	4	0	0	0	0	0	0	0	0	0	0	0	0	3	4	4	4	4	4	0	0	0	0	0	0	0	0	0	0
sp|P15531|NDKA_HUMAN	sp|P15531|NDKA_HUMAN	8	4	4	sp|P15531|NDKA_HUMAN Nucleoside diphosphate kinase A OS=Homo sapiens OX=9606 GN=NME1 PE=1 SV=1	1	8	4	4	7	7	8	8	6	7	6	5	7	6	6	5	8	8	7	8	8	8	3	3	4	4	3	3	2	2	3	2	2	2	4	4	4	4	4	4	3	3	4	4
sp|P15559|NQO1_HUMAN	sp|P15559|NQO1_HUMAN	7	7	7	sp|P15559|NQO1_HUMAN NAD(P)H dehydrogenase [quinone] 1 OS=Homo sapiens OX=9606 GN=NQO1 PE=1 SV=1	1	7	7	7	2	1	3	1	2	3	0	0	0	0	1	0	4	2	3	3	4	4	2	1	3	1	2	3	0	0	0	0	1	0	4	2	3	3	4	4	2	1	3	1
sp|P15586|GNS_HUMAN	sp|P15586|GNS_HUMAN	5	5	5	sp|P15586|GNS_HUMAN N-acetylglucosamine-6-sulfatase OS=Homo sapiens OX=9606 GN=GNS PE=1 SV=3	1	5	5	5	3	4	3	2	4	4	2	2	2	1	2	2	2	1	3	2	2	2	3	4	3	2	4	4	2	2	2	1	2	2	2	1	3	2	2	2	3	4	3	2
sp|P15621|ZNF44_HUMAN	sp|P15621|ZNF44_HUMAN	1	1	1	sp|P15621|ZNF44_HUMAN Zinc finger protein 44 OS=Homo sapiens OX=9606 GN=ZNF44 PE=2 SV=3	1	1	1	1	1	1	1	1	1	1	0	0	0	0	0	0	1	1	1	1	1	1	1	1	1	1	1	1	0	0	0	0	0	0	1	1	1	1	1	1	1	1	1	1
sp|P15814|IGLL1_HUMAN	sp|P15814|IGLL1_HUMAN	1	1	1	sp|P15814|IGLL1_HUMAN Immunoglobulin lambda-like polypeptide 1 OS=Homo sapiens OX=9606 GN=IGLL1 PE=1 SV=1	1	1	1	1	0	0	0	0	0	0	1	1	1	1	1	1	0	0	0	0	0	0	0	0	0	0	0	0	1	1	1	1	1	1	0	0	0	0	0	0	0	0	0	0
sp|P15880|RS2_HUMAN	sp|P15880|RS2_HUMAN	11	11	11	sp|P15880|RS2_HUMAN 40S ribosomal protein S2 OS=Homo sapiens OX=9606 GN=RPS2 PE=1 SV=2	1	11	11	11	3	5	4	4	4	4	8	8	8	7	8	9	9	7	5	6	6	7	3	5	4	4	4	4	8	8	8	7	8	9	9	7	5	6	6	7	3	5	4	4
sp|P15924|DESP_HUMAN	sp|P15924|DESP_HUMAN	174	174	174	sp|P15924|DESP_HUMAN Desmoplakin OS=Homo sapiens OX=9606 GN=DSP PE=1 SV=3	1	174	174	174	50	49	50	57	48	60	63	62	66	62	59	62	142	141	135	142	137	137	50	49	50	57	48	60	63	62	66	62	59	62	142	141	135	142	137	137	50	49	50	57
sp|P15927|RFA2_HUMAN	sp|P15927|RFA2_HUMAN	2	2	2	sp|P15927|RFA2_HUMAN Replication protein A 32 kDa subunit OS=Homo sapiens OX=9606 GN=RPA2 PE=1 SV=1	1	2	2	2	1	1	1	1	1	1	2	0	2	2	2	2	1	1	1	1	1	1	1	1	1	1	1	1	2	0	2	2	2	2	1	1	1	1	1	1	1	1	1	1
sp|P15941|MUC1_HUMAN	sp|P15941|MUC1_HUMAN	5	5	5	sp|P15941|MUC1_HUMAN Mucin-1 OS=Homo sapiens OX=9606 GN=MUC1 PE=1 SV=3	1	5	5	5	3	3	3	4	5	4	1	1	1	1	1	1	2	1	2	3	3	2	3	3	3	4	5	4	1	1	1	1	1	1	2	1	2	3	3	2	3	3	3	4
sp|P16070|CD44_HUMAN	sp|P16070|CD44_HUMAN	7	7	7	sp|P16070|CD44_HUMAN CD44 antigen OS=Homo sapiens OX=9606 GN=CD44 PE=1 SV=3	1	7	7	7	4	4	4	4	4	3	3	3	3	2	4	2	6	6	6	7	6	6	4	4	4	4	4	3	3	3	3	2	4	2	6	6	6	7	6	6	4	4	4	4
sp|P16083|NQO2_HUMAN	sp|P16083|NQO2_HUMAN	4	4	4	sp|P16083|NQO2_HUMAN Ribosyldihydronicotinamide dehydrogenase [quinone] OS=Homo sapiens OX=9606 GN=NQO2 PE=1 SV=5	1	4	4	4	0	0	0	0	0	0	0	0	0	0	0	0	3	3	1	1	1	4	0	0	0	0	0	0	0	0	0	0	0	0	3	3	1	1	1	4	0	0	0	0
sp|P16104|H2AX_HUMAN;sp|Q96QV6|H2A1A_HUMAN	sp|P16104|H2AX_HUMAN;sp|Q96QV6|H2A1A_HUMAN	4;3	1;1	0;0	sp|P16104|H2AX_HUMAN Histone H2AX OS=Homo sapiens OX=9606 GN=H2AX PE=1 SV=2;sp|Q96QV6|H2A1A_HUMAN Histone H2A type 1-A OS=Homo sapiens OX=9606 GN=H2AC1 PE=1 SV=3	2	4	1	0	4	3	4	3	3	3	4	4	3	3	3	4	3	3	3	3	3	3	1	1	1	1	1	1	1	1	1	1	1	1	1	1	1	1	1	1	0	0	0	0
sp|P16144|ITB4_HUMAN	sp|P16144|ITB4_HUMAN	29	29	29	sp|P16144|ITB4_HUMAN Integrin beta-4 OS=Homo sapiens OX=9606 GN=ITGB4 PE=1 SV=5	1	29	29	29	11	13	14	14	13	13	6	6	4	3	6	8	14	12	16	13	15	11	11	13	14	14	13	13	6	6	4	3	6	8	14	12	16	13	15	11	11	13	14	14
sp|P16152|CBR1_HUMAN	sp|P16152|CBR1_HUMAN	16	16	14	sp|P16152|CBR1_HUMAN Carbonyl reductase [NADPH] 1 OS=Homo sapiens OX=9606 GN=CBR1 PE=1 SV=3	1	16	16	14	11	8	10	11	7	11	13	14	14	14	12	13	15	15	14	15	14	12	11	8	10	11	7	11	13	14	14	14	12	13	15	15	14	15	14	12	9	6	8	9
sp|P16157|ANK1_HUMAN	sp|P16157|ANK1_HUMAN	42	42	40	sp|P16157|ANK1_HUMAN Ankyrin-1 OS=Homo sapiens OX=9606 GN=ANK1 PE=1 SV=3	1	42	42	40	15	11	13	15	14	12	12	13	12	14	15	15	28	25	23	27	24	22	15	11	13	15	14	12	12	13	12	14	15	15	28	25	23	27	24	22	15	11	13	15
sp|P16219|ACADS_HUMAN	sp|P16219|ACADS_HUMAN	5	5	5	sp|P16219|ACADS_HUMAN Short-chain specific acyl-CoA dehydrogenase, mitochondrial OS=Homo sapiens OX=9606 GN=ACADS PE=1 SV=1	1	5	5	5	0	0	0	0	0	0	1	2	2	1	1	2	1	1	1	2	1	1	0	0	0	0	0	0	1	2	2	1	1	2	1	1	1	2	1	1	0	0	0	0
sp|P16278|BGAL_HUMAN	sp|P16278|BGAL_HUMAN	5	5	5	sp|P16278|BGAL_HUMAN Beta-galactosidase OS=Homo sapiens OX=9606 GN=GLB1 PE=1 SV=2	1	5	5	5	4	4	3	3	3	3	0	0	0	0	0	0	1	1	1	2	1	2	4	4	3	3	3	3	0	0	0	0	0	0	1	1	1	2	1	2	4	4	3	3
sp|P16284|PECA1_HUMAN	sp|P16284|PECA1_HUMAN	4	4	4	sp|P16284|PECA1_HUMAN Platelet endothelial cell adhesion molecule OS=Homo sapiens OX=9606 GN=PECAM1 PE=1 SV=2	1	4	4	4	2	2	3	2	2	2	2	2	2	2	3	1	2	0	2	3	0	3	2	2	3	2	2	2	2	2	2	2	3	1	2	0	2	3	0	3	2	2	3	2
sp|P16333|NCK1_HUMAN	sp|P16333|NCK1_HUMAN	4	4	4	sp|P16333|NCK1_HUMAN Cytoplasmic protein NCK1 OS=Homo sapiens OX=9606 GN=NCK1 PE=1 SV=1	1	4	4	4	0	1	1	0	0	1	0	0	0	0	0	0	0	2	1	1	2	1	0	1	1	0	0	1	0	0	0	0	0	0	0	2	1	1	2	1	0	1	1	0
sp|P16401|H15_HUMAN	sp|P16401|H15_HUMAN	5	4	4	sp|P16401|H15_HUMAN Histone H1.5 OS=Homo sapiens OX=9606 GN=H1-5 PE=1 SV=3	1	5	4	4	3	3	2	3	2	2	3	3	3	3	3	2	2	3	2	3	2	2	3	3	2	3	2	2	3	3	2	2	3	2	2	3	2	3	2	2	3	3	2	3
sp|P16402|H13_HUMAN	sp|P16402|H13_HUMAN	7	7	1	sp|P16402|H13_HUMAN Histone H1.3 OS=Homo sapiens OX=9606 GN=H1-3 PE=1 SV=2	1	7	7	1	3	4	4	4	4	4	6	6	7	7	6	6	5	4	5	5	5	3	3	4	4	4	4	4	6	6	7	7	6	6	5	4	5	5	5	3	1	1	1	1
sp|P16403|H12_HUMAN	sp|P16403|H12_HUMAN	7	1	1	sp|P16403|H12_HUMAN Histone H1.2 OS=Homo sapiens OX=9606 GN=H1-2 PE=1 SV=2	1	7	1	1	3	4	4	4	4	4	6	6	6	7	6	6	5	4	5	5	5	3	1	1	1	1	1	1	1	1	0	1	1	1	1	1	1	1	1	1	1	1	1	1
sp|P16422|EPCAM_HUMAN	sp|P16422|EPCAM_HUMAN	6	6	6	sp|P16422|EPCAM_HUMAN Epithelial cell adhesion molecule OS=Homo sapiens OX=9606 GN=EPCAM PE=1 SV=2	1	6	6	6	5	6	6	6	6	5	0	0	1	0	1	0	1	0	1	0	0	1	5	6	6	6	6	5	0	0	1	0	1	0	1	0	1	0	0	1	5	6	6	6
sp|P16435|NCPR_HUMAN	sp|P16435|NCPR_HUMAN	19	19	19	sp|P16435|NCPR_HUMAN NADPH--cytochrome P450 reductase OS=Homo sapiens OX=9606 GN=POR PE=1 SV=2	1	19	19	19	14	15	14	15	16	17	1	1	0	1	1	0	7	6	7	8	8	8	14	15	14	15	16	17	1	1	0	1	1	0	7	6	7	8	8	8	14	15	14	15
sp|P16444|DPEP1_HUMAN	sp|P16444|DPEP1_HUMAN	8	8	8	sp|P16444|DPEP1_HUMAN Dipeptidase 1 OS=Homo sapiens OX=9606 GN=DPEP1 PE=1 SV=3	1	8	8	8	5	7	4	4	4	6	0	0	1	0	1	0	0	0	0	0	0	0	5	7	4	4	4	6	0	0	1	0	1	0	0	0	0	0	0	0	5	7	4	4
sp|P16452|EPB42_HUMAN	sp|P16452|EPB42_HUMAN	12	12	12	sp|P16452|EPB42_HUMAN Protein 4.2 OS=Homo sapiens OX=9606 GN=EPB42 PE=1 SV=3	1	12	12	12	6	4	6	4	4	3	5	3	6	4	4	2	6	7	4	6	5	3	6	4	6	4	4	3	5	3	6	4	4	2	6	7	4	6	5	3	6	4	6	4
sp|P16455|MGMT_HUMAN	sp|P16455|MGMT_HUMAN	3	3	3	sp|P16455|MGMT_HUMAN Methylated-DNA--protein-cysteine methyltransferase OS=Homo sapiens OX=9606 GN=MGMT PE=1 SV=1	1	3	3	3	0	0	1	0	2	0	1	0	0	0	1	1	2	2	3	2	2	2	0	0	1	0	2	0	1	0	0	0	1	1	2	2	3	2	2	2	0	0	1	0
sp|P16615|AT2A2_HUMAN;sp|O14983|AT2A1_HUMAN	sp|P16615|AT2A2_HUMAN	35;9	35;9	30;7	sp|P16615|AT2A2_HUMAN Sarcoplasmic/endoplasmic reticulum calcium ATPase 2 OS=Homo sapiens OX=9606 GN=ATP2A2 PE=1 SV=1	2	35	35	30	27	19	25	26	25	22	1	1	2	1	2	1	22	20	20	21	20	20	27	19	25	26	25	22	1	1	2	1	2	1	22	20	20	21	20	20	22	15	21	22
sp|P16671|CD36_HUMAN	sp|P16671|CD36_HUMAN	2	2	2	sp|P16671|CD36_HUMAN Platelet glycoprotein 4 OS=Homo sapiens OX=9606 GN=CD36 PE=1 SV=2	1	2	2	2	0	0	0	0	0	1	0	0	0	0	0	0	0	0	0	0	0	1	0	0	0	0	0	1	0	0	0	0	0	0	0	0	0	0	0	1	0	0	0	0
sp|P16885|PLCG2_HUMAN	sp|P16885|PLCG2_HUMAN	17	17	16	sp|P16885|PLCG2_HUMAN 1-phosphatidylinositol 4,5-bisphosphate phosphodiesterase gamma-2 OS=Homo sapiens OX=9606 GN=PLCG2 PE=1 SV=4	1	17	17	16	7	11	10	9	6	7	0	0	0	0	0	0	0	0	1	0	0	1	7	11	10	9	6	7	0	0	0	0	0	0	0	0	1	0	0	1	6	10	9	8
sp|P16930|FAAA_HUMAN	sp|P16930|FAAA_HUMAN	5	5	5	sp|P16930|FAAA_HUMAN Fumarylacetoacetase OS=Homo sapiens OX=9606 GN=FAH PE=1 SV=2	1	5	5	5	2	2	1	2	2	1	3	3	2	2	3	3	2	1	2	2	0	2	2	2	1	2	2	1	3	3	2	2	3	3	2	1	2	2	0	2	2	2	1	2
sp|P16949|STMN1_HUMAN;sp|Q9H169|STMN4_HUMAN	sp|P16949|STMN1_HUMAN	9;1	9;1	7;0	sp|P16949|STMN1_HUMAN Stathmin OS=Homo sapiens OX=9606 GN=STMN1 PE=1 SV=3	2	9	9	7	7	7	7	8	7	5	2	1	1	2	2	2	6	5	6	5	6	5	7	7	7	8	7	5	2	1	1	2	2	2	6	5	6	5	6	5	5	5	5	6
sp|P16989|YBOX3_HUMAN;sp|Q9Y2T7|YBOX2_HUMAN	sp|P16989|YBOX3_HUMAN;sp|Q9Y2T7|YBOX2_HUMAN	4;3	1;0	1;0	sp|P16989|YBOX3_HUMAN Y-box-binding protein 3 OS=Homo sapiens OX=9606 GN=YBX3 PE=1 SV=4;sp|Q9Y2T7|YBOX2_HUMAN Y-box-binding protein 2 OS=Homo sapiens OX=9606 GN=YBX2 PE=1 SV=2	2	4	1	1	3	2	2	3	2	3	1	1	1	0	1	1	4	4	3	4	3	3	1	0	0	1	0	1	0	0	0	0	0	0	1	1	1	1	1	1	1	0	0	1
sp|P17050|NAGAB_HUMAN	sp|P17050|NAGAB_HUMAN	4	4	4	sp|P17050|NAGAB_HUMAN Alpha-N-acetylgalactosaminidase OS=Homo sapiens OX=9606 GN=NAGA PE=1 SV=2	1	4	4	4	2	2	2	2	2	2	0	0	0	1	0	0	2	1	1	2	3	1	2	2	2	2	2	2	0	0	0	1	0	0	2	1	1	2	3	1	2	2	2	2
sp|P17066|HSP76_HUMAN;sp|P48741|HSP77_HUMAN	sp|P17066|HSP76_HUMAN;sp|P48741|HSP77_HUMAN	11;6	1;1	1;1	sp|P17066|HSP76_HUMAN Heat shock 70 kDa protein 6 OS=Homo sapiens OX=9606 GN=HSPA6 PE=1 SV=2;sp|P48741|HSP77_HUMAN Putative heat shock 70 kDa protein 7 OS=Homo sapiens OX=9606 GN=HSPA7 PE=5 SV=2	2	11	1	1	9	10	10	9	10	9	7	9	10	11	10	11	10	10	10	10	10	9	1	1	1	1	1	1	1	1	1	1	1	1	1	1	1	1	1	1	1	1	1	1
sp|P17096|HMGA1_HUMAN	sp|P17096|HMGA1_HUMAN	5	5	5	sp|P17096|HMGA1_HUMAN High mobility group protein HMG-I/HMG-Y OS=Homo sapiens OX=9606 GN=HMGA1 PE=1 SV=3	1	5	5	5	3	3	3	3	1	3	0	0	0	0	0	0	1	1	1	0	1	0	3	3	3	3	1	3	0	0	0	0	0	0	1	1	1	0	1	0	3	3	3	3
sp|P17174|AATC_HUMAN	sp|P17174|AATC_HUMAN	10	10	10	sp|P17174|AATC_HUMAN Aspartate aminotransferase, cytoplasmic OS=Homo sapiens OX=9606 GN=GOT1 PE=1 SV=3	1	10	10	10	5	5	5	5	4	5	5	5	5	5	4	5	7	6	7	6	7	5	5	5	5	5	4	5	5	5	5	5	4	5	7	6	7	6	7	5	5	5	5	5
sp|P17213|BPI_HUMAN	sp|P17213|BPI_HUMAN	2	2	2	sp|P17213|BPI_HUMAN Bactericidal permeability-increasing protein OS=Homo sapiens OX=9606 GN=BPI PE=1 SV=4	1	2	2	2	1	1	1	0	0	1	0	0	0	0	0	0	1	1	1	2	1	1	1	1	1	0	0	1	0	0	0	0	0	0	1	1	1	2	1	1	1	1	1	0
sp|P17252|KPCA_HUMAN;sp|P05771|KPCB_HUMAN	sp|P17252|KPCA_HUMAN;sp|P05771|KPCB_HUMAN	2;1	2;1	2;1	sp|P17252|KPCA_HUMAN Protein kinase C alpha type OS=Homo sapiens OX=9606 GN=PRKCA PE=1 SV=4;sp|P05771|KPCB_HUMAN Protein kinase C beta type OS=Homo sapiens OX=9606 GN=PRKCB PE=1 SV=4	2	2	2	2	0	2	1	1	2	2	0	0	0	0	0	0	0	0	0	0	0	0	0	2	1	1	2	2	0	0	0	0	0	0	0	0	0	0	0	0	0	2	1	1
sp|P17301|ITA2_HUMAN	sp|P17301|ITA2_HUMAN	12	12	12	sp|P17301|ITA2_HUMAN Integrin alpha-2 OS=Homo sapiens OX=9606 GN=ITGA2 PE=1 SV=1	1	12	12	12	5	4	5	6	6	4	1	1	1	1	1	1	8	6	4	6	6	5	5	4	5	6	6	4	1	1	1	1	1	1	8	6	4	6	6	5	5	4	5	6
sp|P17302|CXA1_HUMAN	sp|P17302|CXA1_HUMAN	4	4	4	sp|P17302|CXA1_HUMAN Gap junction alpha-1 protein OS=Homo sapiens OX=9606 GN=GJA1 PE=1 SV=2	1	4	4	4	0	1	1	1	0	1	1	0	0	1	1	0	4	3	3	3	3	3	0	1	1	1	0	1	1	0	0	1	1	0	4	3	3	3	3	3	0	1	1	1
sp|P17480|UBF1_HUMAN	sp|P17480|UBF1_HUMAN	3	3	3	sp|P17480|UBF1_HUMAN Nucleolar transcription factor 1 OS=Homo sapiens OX=9606 GN=UBTF PE=1 SV=1	1	3	3	3	1	0	2	1	0	0	0	0	0	0	0	0	0	0	0	1	0	0	1	0	2	1	0	0	0	0	0	0	0	0	0	0	0	1	0	0	1	0	2	1
sp|P17540|KCRS_HUMAN	sp|P17540|KCRS_HUMAN	4	2	2	sp|P17540|KCRS_HUMAN Creatine kinase S-type, mitochondrial OS=Homo sapiens OX=9606 GN=CKMT2 PE=1 SV=2	1	4	2	2	2	1	1	2	2	1	1	1	1	1	1	1	0	1	0	1	0	0	1	0	0	1	1	0	0	0	0	0	0	0	0	0	0	0	0	0	1	0	0	1
sp|P17612|KAPCA_HUMAN	sp|P17612|KAPCA_HUMAN	8	8	3	sp|P17612|KAPCA_HUMAN cAMP-dependent protein kinase catalytic subunit alpha OS=Homo sapiens OX=9606 GN=PRKACA PE=1 SV=2	1	8	8	3	3	3	3	4	3	3	1	2	3	1	1	3	3	3	3	5	5	3	3	3	3	4	3	3	1	2	3	1	1	3	3	3	3	5	5	3	1	0	0	2
sp|P17655|CAN2_HUMAN	sp|P17655|CAN2_HUMAN	23	23	23	sp|P17655|CAN2_HUMAN Calpain-2 catalytic subunit OS=Homo sapiens OX=9606 GN=CAPN2 PE=1 SV=6	1	23	23	23	8	9	9	8	9	9	11	11	13	10	12	11	16	18	19	19	16	17	8	9	9	8	9	9	11	11	13	10	12	11	16	18	19	19	16	17	8	9	9	8
sp|P17661|DESM_HUMAN	sp|P17661|DESM_HUMAN	37	32	32	sp|P17661|DESM_HUMAN Desmin OS=Homo sapiens OX=9606 GN=DES PE=1 SV=3	1	37	32	32	32	34	33	33	35	34	30	31	32	29	32	30	11	9	10	10	11	10	27	29	28	28	30	29	25	26	27	25	27	26	6	4	5	5	6	5	27	29	28	28
sp|P17693|HLAG_HUMAN	sp|P17693|HLAG_HUMAN	2	1	1	sp|P17693|HLAG_HUMAN HLA class I histocompatibility antigen, alpha chain G OS=Homo sapiens OX=9606 GN=HLA-G PE=1 SV=1	1	2	1	1	2	1	2	1	1	2	1	2	0	1	1	2	2	1	2	2	2	2	1	1	1	1	1	1	1	1	0	1	1	1	1	0	1	1	1	1	1	1	1	1
sp|P17812|PYRG1_HUMAN	sp|P17812|PYRG1_HUMAN	9	9	8	sp|P17812|PYRG1_HUMAN CTP synthase 1 OS=Homo sapiens OX=9606 GN=CTPS1 PE=1 SV=2	1	9	9	8	2	1	3	2	1	2	1	3	0	1	1	0	5	4	3	3	5	4	2	1	3	2	1	2	1	3	0	1	1	0	5	4	3	3	5	4	2	1	3	2
sp|P17813|EGLN_HUMAN	sp|P17813|EGLN_HUMAN	2	2	2	sp|P17813|EGLN_HUMAN Endoglin OS=Homo sapiens OX=9606 GN=ENG PE=1 SV=2	1	2	2	2	1	2	1	1	1	1	0	0	0	0	0	0	0	0	0	0	0	1	1	2	1	1	1	1	0	0	0	0	0	0	0	0	0	0	0	1	1	2	1	1
sp|P17844|DDX5_HUMAN	sp|P17844|DDX5_HUMAN	18	12	12	sp|P17844|DDX5_HUMAN Probable ATP-dependent RNA helicase DDX5 OS=Homo sapiens OX=9606 GN=DDX5 PE=1 SV=1	1	18	12	12	8	10	10	10	11	11	4	4	4	3	4	5	12	14	15	14	13	10	4	6	5	5	5	5	1	1	0	0	0	1	7	8	9	9	8	6	4	6	5	5
sp|P17858|PFKAL_HUMAN	sp|P17858|PFKAL_HUMAN	26	26	23	sp|P17858|PFKAL_HUMAN ATP-dependent 6-phosphofructokinase, liver type OS=Homo sapiens OX=9606 GN=PFKL PE=1 SV=6	1	26	26	23	15	15	16	16	12	15	9	8	8	8	10	8	16	19	15	15	17	19	15	15	16	16	12	15	9	8	8	8	10	8	16	19	15	15	17	19	13	13	13	14
sp|P17900|SAP3_HUMAN	sp|P17900|SAP3_HUMAN	2	2	2	sp|P17900|SAP3_HUMAN Ganglioside GM2 activator OS=Homo sapiens OX=9606 GN=GM2A PE=1 SV=4	1	2	2	2	0	1	1	0	0	1	2	2	1	2	1	2	0	1	0	0	1	0	0	1	1	0	0	1	2	2	1	2	1	2	0	1	0	0	1	0	0	1	1	0
sp|P17931|LEG3_HUMAN	sp|P17931|LEG3_HUMAN	12	12	12	sp|P17931|LEG3_HUMAN Galectin-3 OS=Homo sapiens OX=9606 GN=LGALS3 PE=1 SV=5	1	12	12	12	6	7	7	7	6	7	7	9	9	9	11	10	6	6	6	6	7	5	6	7	7	7	6	7	7	9	9	9	11	10	6	6	6	6	7	5	6	7	7	7
sp|P17936|IBP3_HUMAN	sp|P17936|IBP3_HUMAN	2	2	2	sp|P17936|IBP3_HUMAN Insulin-like growth factor-binding protein 3 OS=Homo sapiens OX=9606 GN=IGFBP3 PE=1 SV=2	1	2	2	2	0	1	1	0	1	1	1	1	2	1	1	1	0	1	0	0	1	0	0	1	1	0	1	1	1	1	2	1	1	1	0	1	0	0	1	0	0	1	1	0
sp|P17980|PRS6A_HUMAN	sp|P17980|PRS6A_HUMAN	18	18	18	sp|P17980|PRS6A_HUMAN 26S proteasome regulatory subunit 6A OS=Homo sapiens OX=9606 GN=PSMC3 PE=1 SV=3	1	18	18	18	12	13	14	11	11	10	7	10	10	10	8	10	12	9	10	10	11	11	12	13	14	11	11	10	7	10	10	10	8	10	12	9	10	10	11	11	12	13	14	11
sp|P17987|TCPA_HUMAN	sp|P17987|TCPA_HUMAN	24	24	24	sp|P17987|TCPA_HUMAN T-complex protein 1 subunit alpha OS=Homo sapiens OX=9606 GN=TCP1 PE=1 SV=1	1	24	24	24	14	15	16	15	16	16	14	8	11	12	9	10	17	19	18	16	16	20	14	15	16	15	16	16	14	8	11	12	9	10	17	19	18	16	16	20	14	15	16	15
sp|P18031|PTN1_HUMAN	sp|P18031|PTN1_HUMAN	6	6	6	sp|P18031|PTN1_HUMAN Tyrosine-protein phosphatase non-receptor type 1 OS=Homo sapiens OX=9606 GN=PTPN1 PE=1 SV=1	1	6	6	6	3	3	2	0	1	2	0	0	0	0	0	0	3	3	3	3	2	4	3	3	2	0	1	2	0	0	0	0	0	0	3	3	3	3	2	4	3	3	2	0
sp|P18054|LOX12_HUMAN	sp|P18054|LOX12_HUMAN	3	3	3	sp|P18054|LOX12_HUMAN Polyunsaturated fatty acid lipoxygenase ALOX12 OS=Homo sapiens OX=9606 GN=ALOX12 PE=1 SV=4	1	3	3	3	0	0	0	0	0	0	1	1	2	2	2	3	0	0	0	0	0	0	0	0	0	0	0	0	1	1	2	2	2	3	0	0	0	0	0	0	0	0	0	0
sp|P18065|IBP2_HUMAN	sp|P18065|IBP2_HUMAN	1	1	1	sp|P18065|IBP2_HUMAN Insulin-like growth factor-binding protein 2 OS=Homo sapiens OX=9606 GN=IGFBP2 PE=1 SV=2	1	1	1	1	1	0	1	1	0	0	0	0	0	0	0	0	0	0	0	0	0	0	1	0	1	1	0	0	0	0	0	0	0	0	0	0	0	0	0	0	1	0	1	1
sp|P18077|RL35A_HUMAN	sp|P18077|RL35A_HUMAN	2	2	2	sp|P18077|RL35A_HUMAN 60S ribosomal protein L35a OS=Homo sapiens OX=9606 GN=RPL35A PE=1 SV=2	1	2	2	2	1	1	1	1	2	2	1	1	1	1	1	1	0	1	1	0	0	0	1	1	1	1	2	2	1	1	1	1	1	1	0	1	1	0	0	0	1	1	1	1
sp|P18084|ITB5_HUMAN	sp|P18084|ITB5_HUMAN	2	2	2	sp|P18084|ITB5_HUMAN Integrin beta-5 OS=Homo sapiens OX=9606 GN=ITGB5 PE=1 SV=1	1	2	2	2	1	0	1	0	0	0	0	0	0	0	0	0	0	0	0	0	0	0	1	0	1	0	0	0	0	0	0	0	0	0	0	0	0	0	0	0	1	0	1	0
sp|P18085|ARF4_HUMAN	sp|P18085|ARF4_HUMAN	9	5	5	sp|P18085|ARF4_HUMAN ADP-ribosylation factor 4 OS=Homo sapiens OX=9606 GN=ARF4 PE=1 SV=3	1	9	5	5	7	8	7	7	8	7	8	8	8	8	8	8	9	8	9	9	9	9	4	4	4	4	4	4	5	5	5	5	5	5	5	5	5	5	5	5	4	4	4	4
sp|P18124|RL7_HUMAN	sp|P18124|RL7_HUMAN	11	11	11	sp|P18124|RL7_HUMAN 60S ribosomal protein L7 OS=Homo sapiens OX=9606 GN=RPL7 PE=1 SV=1	1	11	11	11	4	6	6	5	4	9	6	6	6	6	6	6	4	4	4	5	5	5	4	6	6	5	4	9	6	6	6	6	6	6	4	4	4	5	5	5	4	6	6	5
sp|P18206|VINC_HUMAN	sp|P18206|VINC_HUMAN	52	52	52	sp|P18206|VINC_HUMAN Vinculin OS=Homo sapiens OX=9606 GN=VCL PE=1 SV=4	1	52	52	52	35	31	38	34	33	36	33	37	35	32	34	33	33	39	34	37	37	37	35	31	38	34	33	36	33	37	35	32	34	33	33	39	34	37	37	37	35	31	38	34
sp|P18428|LBP_HUMAN	sp|P18428|LBP_HUMAN	3	3	3	sp|P18428|LBP_HUMAN Lipopolysaccharide-binding protein OS=Homo sapiens OX=9606 GN=LBP PE=1 SV=3	1	3	3	3	0	1	0	1	0	0	2	2	2	2	2	2	2	2	2	2	2	2	0	1	0	1	0	0	2	2	2	2	2	2	2	2	2	2	2	2	0	1	0	1
sp|P18433|PTPRA_HUMAN	sp|P18433|PTPRA_HUMAN	3	3	3	sp|P18433|PTPRA_HUMAN Receptor-type tyrosine-protein phosphatase alpha OS=Homo sapiens OX=9606 GN=PTPRA PE=1 SV=3	1	3	3	3	0	0	0	0	1	0	1	0	1	1	0	1	1	3	2	1	1	1	0	0	0	0	1	0	1	0	1	1	0	1	1	3	2	1	1	1	0	0	0	0
sp|P18440|ARY1_HUMAN	sp|P18440|ARY1_HUMAN	2	2	2	sp|P18440|ARY1_HUMAN Arylamine N-acetyltransferase 1 OS=Homo sapiens OX=9606 GN=NAT1 PE=1 SV=2	1	2	2	2	1	2	1	1	1	2	0	0	0	0	0	0	0	1	0	0	0	1	1	2	1	1	1	2	0	0	0	0	0	0	0	1	0	0	0	1	1	2	1	1
sp|P18510|IL1RA_HUMAN	sp|P18510|IL1RA_HUMAN	7	7	7	sp|P18510|IL1RA_HUMAN Interleukin-1 receptor antagonist protein OS=Homo sapiens OX=9606 GN=IL1RN PE=1 SV=1	1	7	7	7	3	4	3	4	3	3	5	4	5	5	5	5	5	4	5	5	6	6	3	4	3	4	3	3	5	4	5	5	5	5	5	4	5	5	6	6	3	4	3	4
sp|P18564|ITB6_HUMAN	sp|P18564|ITB6_HUMAN	10	10	10	sp|P18564|ITB6_HUMAN Integrin beta-6 OS=Homo sapiens OX=9606 GN=ITGB6 PE=1 SV=2	1	10	10	10	3	1	0	2	2	5	1	0	1	1	0	1	8	7	6	5	5	6	3	1	0	2	2	5	1	0	1	1	0	1	8	7	6	5	5	6	3	1	0	2
sp|P18583|SON_HUMAN	sp|P18583|SON_HUMAN	6	6	6	sp|P18583|SON_HUMAN Protein SON OS=Homo sapiens OX=9606 GN=SON PE=1 SV=4	1	6	6	6	3	3	2	3	4	3	0	0	1	0	0	0	2	4	4	2	4	2	3	3	2	3	4	3	0	0	1	0	0	0	2	4	4	2	4	2	3	3	2	3
sp|P18621|RL17_HUMAN	sp|P18621|RL17_HUMAN	5	5	5	sp|P18621|RL17_HUMAN 60S ribosomal protein L17 OS=Homo sapiens OX=9606 GN=RPL17 PE=1 SV=3	1	5	5	5	3	3	2	3	3	2	3	2	2	2	2	2	2	3	3	4	4	4	3	3	2	3	3	2	3	2	2	2	2	2	2	3	3	4	4	4	3	3	2	3
sp|P18669|PGAM1_HUMAN;sp|P15259|PGAM2_HUMAN;sp|Q8N0Y7|PGAM4_HUMAN	sp|P18669|PGAM1_HUMAN	15;5;4	15;5;4	15;5;4	sp|P18669|PGAM1_HUMAN Phosphoglycerate mutase 1 OS=Homo sapiens OX=9606 GN=PGAM1 PE=1 SV=2	3	15	15	15	13	13	13	13	14	13	13	13	13	12	13	13	12	14	13	11	12	13	13	13	13	13	14	13	13	13	13	12	13	13	12	14	13	11	12	13	13	13	13	13
sp|P18754|RCC1_HUMAN	sp|P18754|RCC1_HUMAN	10	10	10	sp|P18754|RCC1_HUMAN Regulator of chromosome condensation OS=Homo sapiens OX=9606 GN=RCC1 PE=1 SV=1	1	10	10	10	6	7	6	7	7	7	0	0	1	0	0	1	8	7	7	7	6	5	6	7	6	7	7	7	0	0	1	0	0	1	8	7	7	7	6	5	6	7	6	7
sp|P18827|SDC1_HUMAN	sp|P18827|SDC1_HUMAN	3	3	3	sp|P18827|SDC1_HUMAN Syndecan-1 OS=Homo sapiens OX=9606 GN=SDC1 PE=1 SV=3	1	3	3	3	0	0	0	0	1	1	0	0	0	0	0	0	2	2	2	3	2	2	0	0	0	0	1	1	0	0	0	0	0	0	2	2	2	3	2	2	0	0	0	0
sp|P18859|ATP5J_HUMAN	sp|P18859|ATP5J_HUMAN	4	4	4	sp|P18859|ATP5J_HUMAN ATP synthase-coupling factor 6, mitochondrial OS=Homo sapiens OX=9606 GN=ATP5PF PE=1 SV=1	1	4	4	4	4	2	3	3	3	3	3	2	2	3	2	3	3	4	3	4	4	3	4	2	3	3	3	3	3	2	2	3	2	3	3	4	3	4	4	3	4	2	3	3
sp|P18887|XRCC1_HUMAN	sp|P18887|XRCC1_HUMAN	3	3	3	sp|P18887|XRCC1_HUMAN DNA repair protein XRCC1 OS=Homo sapiens OX=9606 GN=XRCC1 PE=1 SV=2	1	3	3	3	0	1	0	1	0	0	0	0	0	0	0	0	1	1	2	1	1	1	0	1	0	1	0	0	0	0	0	0	0	0	1	1	2	1	1	1	0	1	0	1
sp|P19013|K2C4_HUMAN;CON__P19013	sp|P19013|K2C4_HUMAN;CON__P19013	38;38	36;36	22;22	sp|P19013|K2C4_HUMAN Keratin, type II cytoskeletal 4 OS=Homo sapiens OX=9606 GN=KRT4 PE=1 SV=5;	2	38	36	22	23	20	24	24	22	22	34	31	31	32	33	31	26	26	26	26	23	23	21	18	22	22	20	20	32	29	29	30	31	29	24	24	24	24	21	21	13	11	14	13
sp|P19105|ML12A_HUMAN;sp|O14950|ML12B_HUMAN	sp|P19105|ML12A_HUMAN;sp|O14950|ML12B_HUMAN	8;8	3;3	3;3	sp|P19105|ML12A_HUMAN Myosin regulatory light chain 12A OS=Homo sapiens OX=9606 GN=MYL12A PE=1 SV=2;sp|O14950|ML12B_HUMAN Myosin regulatory light chain 12B OS=Homo sapiens OX=9606 GN=MYL12B PE=1 SV=2	2	8	3	3	8	8	8	8	7	8	8	8	8	8	8	8	8	7	8	8	8	8	3	3	3	3	3	3	3	3	3	3	3	3	3	3	3	3	3	3	3	3	3	3
sp|P19338|NUCL_HUMAN	sp|P19338|NUCL_HUMAN	22	22	22	sp|P19338|NUCL_HUMAN Nucleolin OS=Homo sapiens OX=9606 GN=NCL PE=1 SV=3	1	22	22	22	19	18	18	17	15	16	15	15	13	15	14	14	19	21	19	20	19	21	19	18	18	17	15	16	15	15	13	15	14	14	19	21	19	20	19	21	19	18	18	17
sp|P19367|HXK1_HUMAN	sp|P19367|HXK1_HUMAN	23	23	18	sp|P19367|HXK1_HUMAN Hexokinase-1 OS=Homo sapiens OX=9606 GN=HK1 PE=1 SV=3	1	23	23	18	13	11	16	13	14	13	12	10	9	6	10	10	10	15	15	15	12	13	13	11	16	13	14	13	12	10	9	6	10	10	10	15	15	15	12	13	11	9	13	10
sp|P19387|RPB3_HUMAN	sp|P19387|RPB3_HUMAN	3	3	3	sp|P19387|RPB3_HUMAN DNA-directed RNA polymerase II subunit RPB3 OS=Homo sapiens OX=9606 GN=POLR2C PE=1 SV=2	1	3	3	3	1	1	2	0	1	1	0	1	0	1	1	1	0	0	2	2	1	0	1	1	2	0	1	1	0	1	0	1	1	1	0	0	2	2	1	0	1	1	2	0
sp|P19388|RPAB1_HUMAN	sp|P19388|RPAB1_HUMAN	1	1	1	sp|P19388|RPAB1_HUMAN DNA-directed RNA polymerases I, II, and III subunit RPABC1 OS=Homo sapiens OX=9606 GN=POLR2E PE=1 SV=4	1	1	1	1	1	1	0	1	1	1	0	0	0	0	0	1	0	0	0	0	0	0	1	1	0	1	1	1	0	0	0	0	0	1	0	0	0	0	0	0	1	1	0	1
sp|P19404|NDUV2_HUMAN	sp|P19404|NDUV2_HUMAN	8	8	8	sp|P19404|NDUV2_HUMAN NADH dehydrogenase [ubiquinone] flavoprotein 2, mitochondrial OS=Homo sapiens OX=9606 GN=NDUFV2 PE=1 SV=2	1	8	8	8	4	4	5	4	3	4	3	5	4	5	4	3	2	4	3	6	4	3	4	4	5	4	3	4	3	5	4	5	4	3	2	4	3	6	4	3	4	4	5	4
sp|P19440|GGT1_HUMAN;sp|A6NGU5|GGT3_HUMAN;sp|P36268|GGT2_HUMAN	sp|P19440|GGT1_HUMAN;sp|A6NGU5|GGT3_HUMAN;sp|P36268|GGT2_HUMAN	3;2;2	3;2;2	3;2;2	sp|P19440|GGT1_HUMAN Glutathione hydrolase 1 proenzyme OS=Homo sapiens OX=9606 GN=GGT1 PE=1 SV=2;sp|A6NGU5|GGT3_HUMAN Putative glutathione hydrolase 3 proenzyme OS=Homo sapiens OX=9606 GN=GGT3P PE=5 SV=2;sp|P36268|GGT2_HUMAN Inactive glutathione hydrolase	3	3	3	3	2	3	2	2	2	1	0	0	0	0	1	1	0	0	0	0	0	0	2	3	2	2	2	1	0	0	0	0	1	1	0	0	0	0	0	0	2	3	2	2
sp|P19525|E2AK2_HUMAN	sp|P19525|E2AK2_HUMAN	9	9	9	sp|P19525|E2AK2_HUMAN Interferon-induced, double-stranded RNA-activated protein kinase OS=Homo sapiens OX=9606 GN=EIF2AK2 PE=1 SV=2	1	9	9	9	1	1	3	1	2	2	0	0	1	0	0	0	6	6	6	6	5	9	1	1	3	1	2	2	0	0	1	0	0	0	6	6	6	6	5	9	1	1	3	1
sp|P19623|SPEE_HUMAN	sp|P19623|SPEE_HUMAN	5	5	5	sp|P19623|SPEE_HUMAN Spermidine synthase OS=Homo sapiens OX=9606 GN=SRM PE=1 SV=1	1	5	5	5	0	0	0	0	0	0	3	1	1	1	1	1	0	1	0	2	1	0	0	0	0	0	0	0	3	1	1	1	1	1	0	1	0	2	1	0	0	0	0	0
sp|P19652|A1AG2_HUMAN	sp|P19652|A1AG2_HUMAN	7	4	4	sp|P19652|A1AG2_HUMAN Alpha-1-acid glycoprotein 2 OS=Homo sapiens OX=9606 GN=ORM2 PE=1 SV=2	1	7	4	4	6	7	6	6	6	6	7	7	7	7	7	7	6	5	5	6	5	5	4	4	4	4	4	4	4	4	4	4	4	4	4	3	3	4	3	3	4	4	4	4
sp|P19784|CSK22_HUMAN	sp|P19784|CSK22_HUMAN	2	2	2	sp|P19784|CSK22_HUMAN Casein kinase II subunit alpha OS=Homo sapiens OX=9606 GN=CSNK2A2 PE=1 SV=1	1	2	2	2	0	0	0	1	1	0	0	0	1	0	1	0	0	0	0	0	0	0	0	0	0	1	1	0	0	0	1	0	1	0	0	0	0	0	0	0	0	0	0	1
sp|P19823|ITIH2_HUMAN;CON__Q9TRI1	sp|P19823|ITIH2_HUMAN	18;4	18;4	18;4	sp|P19823|ITIH2_HUMAN Inter-alpha-trypsin inhibitor heavy chain H2 OS=Homo sapiens OX=9606 GN=ITIH2 PE=1 SV=2	2	18	18	18	15	14	16	15	12	15	14	15	15	15	15	16	11	12	12	13	11	14	15	14	16	15	12	15	14	15	15	15	15	16	11	12	12	13	11	14	15	14	16	15
sp|P19827|ITIH1_HUMAN;CON__Q0VCM5	sp|P19827|ITIH1_HUMAN	19;3	19;3	19;3	sp|P19827|ITIH1_HUMAN Inter-alpha-trypsin inhibitor heavy chain H1 OS=Homo sapiens OX=9606 GN=ITIH1 PE=1 SV=3	2	19	19	19	10	11	9	10	9	9	12	11	12	11	10	11	14	13	14	13	13	11	10	11	9	10	9	9	12	11	12	11	10	11	14	13	14	13	13	11	10	11	9	10
sp|P19838|NFKB1_HUMAN	sp|P19838|NFKB1_HUMAN	7	7	7	sp|P19838|NFKB1_HUMAN Nuclear factor NF-kappa-B p105 subunit OS=Homo sapiens OX=9606 GN=NFKB1 PE=1 SV=2	1	7	7	7	1	1	1	1	2	2	0	0	0	0	2	1	2	4	2	2	4	3	1	1	1	1	2	2	0	0	0	0	2	1	2	4	2	2	4	3	1	1	1	1
sp|P19957|ELAF_HUMAN	sp|P19957|ELAF_HUMAN	2	2	2	sp|P19957|ELAF_HUMAN Elafin OS=Homo sapiens OX=9606 GN=PI3 PE=1 SV=3	1	2	2	2	0	0	0	0	0	0	1	1	1	1	1	2	0	0	0	0	0	0	0	0	0	0	0	0	1	1	1	1	1	2	0	0	0	0	0	0	0	0	0	0
sp|P19971|TYPH_HUMAN	sp|P19971|TYPH_HUMAN	22	22	22	sp|P19971|TYPH_HUMAN Thymidine phosphorylase OS=Homo sapiens OX=9606 GN=TYMP PE=1 SV=2	1	22	22	22	8	6	10	9	8	8	9	8	8	8	8	9	21	22	22	19	21	20	8	6	10	9	8	8	9	8	8	8	8	9	21	22	22	19	21	20	8	6	10	9
sp|P20020|AT2B1_HUMAN;sp|Q16720|AT2B3_HUMAN;sp|Q01814|AT2B2_HUMAN	sp|P20020|AT2B1_HUMAN;sp|Q16720|AT2B3_HUMAN;sp|Q01814|AT2B2_HUMAN	12;7;6	3;0;0	3;0;0	sp|P20020|AT2B1_HUMAN Plasma membrane calcium-transporting ATPase 1 OS=Homo sapiens OX=9606 GN=ATP2B1 PE=1 SV=4;sp|Q16720|AT2B3_HUMAN Plasma membrane calcium-transporting ATPase 3 OS=Homo sapiens OX=9606 GN=ATP2B3 PE=1 SV=3;sp|Q01814|AT2B2_HUMAN Plasma mem	3	12	3	3	8	10	6	10	8	8	2	3	1	1	2	3	1	1	2	4	4	2	1	2	1	2	1	1	0	0	0	0	0	0	0	0	0	0	0	0	1	2	1	2
sp|P20036|DPA1_HUMAN	sp|P20036|DPA1_HUMAN	2	2	2	sp|P20036|DPA1_HUMAN HLA class II histocompatibility antigen, DP alpha 1 chain OS=Homo sapiens OX=9606 GN=HLA-DPA1 PE=1 SV=1	1	2	2	2	1	1	1	2	1	0	0	0	0	1	0	0	0	0	0	0	0	0	1	1	1	2	1	0	0	0	0	1	0	0	0	0	0	0	0	0	1	1	1	2
sp|P20042|IF2B_HUMAN	sp|P20042|IF2B_HUMAN	4	4	4	sp|P20042|IF2B_HUMAN Eukaryotic translation initiation factor 2 subunit 2 OS=Homo sapiens OX=9606 GN=EIF2S2 PE=1 SV=2	1	4	4	4	1	1	0	0	1	1	0	1	0	0	0	0	2	2	2	2	3	2	1	1	0	0	1	1	0	1	0	0	0	0	2	2	2	2	3	2	1	1	0	0
sp|P20073|ANXA7_HUMAN	sp|P20073|ANXA7_HUMAN	9	9	9	sp|P20073|ANXA7_HUMAN Annexin A7 OS=Homo sapiens OX=9606 GN=ANXA7 PE=1 SV=3	1	9	9	9	6	4	5	5	7	5	3	3	2	2	3	1	4	4	4	4	2	4	6	4	5	5	7	5	3	3	2	2	3	1	4	4	4	4	2	4	6	4	5	5
sp|P20132|SDHL_HUMAN	sp|P20132|SDHL_HUMAN	1	1	1	sp|P20132|SDHL_HUMAN L-serine dehydratase/L-threonine deaminase OS=Homo sapiens OX=9606 GN=SDS PE=1 SV=2	1	1	1	1	0	1	0	0	0	0	0	0	0	0	0	0	0	0	0	0	0	0	0	1	0	0	0	0	0	0	0	0	0	0	0	0	0	0	0	0	0	1	0	0
sp|P20160|CAP7_HUMAN	sp|P20160|CAP7_HUMAN	2	2	2	sp|P20160|CAP7_HUMAN Azurocidin OS=Homo sapiens OX=9606 GN=AZU1 PE=1 SV=3	1	2	2	2	0	1	1	2	0	0	0	0	0	0	0	0	0	0	1	0	1	0	0	1	1	2	0	0	0	0	0	0	0	0	0	0	1	0	1	0	0	1	1	2
sp|P20290|BTF3_HUMAN	sp|P20290|BTF3_HUMAN	3	3	3	sp|P20290|BTF3_HUMAN Transcription factor BTF3 OS=Homo sapiens OX=9606 GN=BTF3 PE=1 SV=1	1	3	3	3	2	2	3	2	2	2	2	2	3	2	2	2	2	2	3	2	2	2	2	2	3	2	2	2	2	2	3	2	2	2	2	2	3	2	2	2	2	2	3	2
sp|P20292|AL5AP_HUMAN	sp|P20292|AL5AP_HUMAN	2	2	2	sp|P20292|AL5AP_HUMAN Arachidonate 5-lipoxygenase-activating protein OS=Homo sapiens OX=9606 GN=ALOX5AP PE=1 SV=2	1	2	2	2	2	1	2	1	2	1	1	0	0	1	0	0	1	2	1	1	1	1	2	1	2	1	2	1	1	0	0	1	0	0	1	2	1	1	1	1	2	1	2	1
sp|P20336|RAB3A_HUMAN	sp|P20336|RAB3A_HUMAN	3	1	1	sp|P20336|RAB3A_HUMAN Ras-related protein Rab-3A OS=Homo sapiens OX=9606 GN=RAB3A PE=1 SV=1	1	3	1	1	2	1	1	1	0	1	1	1	1	1	2	2	3	3	2	1	2	2	1	1	1	1	0	0	1	1	1	1	1	1	1	1	1	1	1	1	1	1	1	1
sp|P20338|RAB4A_HUMAN	sp|P20338|RAB4A_HUMAN	4	4	3	sp|P20338|RAB4A_HUMAN Ras-related protein Rab-4A OS=Homo sapiens OX=9606 GN=RAB4A PE=1 SV=3	1	4	4	3	1	1	1	1	3	1	0	1	1	1	2	2	2	1	1	0	1	2	1	1	1	1	3	1	0	1	1	1	2	2	2	1	1	0	1	2	1	1	1	1
sp|P20339|RAB5A_HUMAN	sp|P20339|RAB5A_HUMAN	7	4	4	sp|P20339|RAB5A_HUMAN Ras-related protein Rab-5A OS=Homo sapiens OX=9606 GN=RAB5A PE=1 SV=2	1	7	4	4	4	5	6	4	4	5	2	3	4	3	3	3	2	3	2	2	2	3	2	3	4	2	2	3	1	1	1	1	1	1	0	1	0	0	0	1	2	3	4	2
sp|P20340|RAB6A_HUMAN;sp|Q14964|RB39A_HUMAN	sp|P20340|RAB6A_HUMAN	10;1	10;1	4;0	sp|P20340|RAB6A_HUMAN Ras-related protein Rab-6A OS=Homo sapiens OX=9606 GN=RAB6A PE=1 SV=3	2	10	10	4	8	9	8	7	7	8	2	4	3	3	2	2	6	7	6	6	6	5	8	9	8	7	7	8	2	4	3	3	2	2	6	7	6	6	6	5	4	4	4	4
sp|P20591|MX1_HUMAN	sp|P20591|MX1_HUMAN	32	32	29	sp|P20591|MX1_HUMAN Interferon-induced GTP-binding protein Mx1 OS=Homo sapiens OX=9606 GN=MX1 PE=1 SV=4	1	32	32	29	10	8	10	12	9	10	1	1	2	1	3	0	28	30	30	29	30	28	10	8	10	12	9	10	1	1	2	1	3	0	28	30	30	29	30	28	8	6	8	10
sp|P20592|MX2_HUMAN	sp|P20592|MX2_HUMAN	11	8	8	sp|P20592|MX2_HUMAN Interferon-induced GTP-binding protein Mx2 OS=Homo sapiens OX=9606 GN=MX2 PE=1 SV=1	1	11	8	8	2	2	2	2	2	2	0	1	0	1	2	0	10	10	9	10	8	9	0	0	0	0	0	0	0	0	0	0	0	0	7	7	6	7	5	6	0	0	0	0
sp|P20618|PSB1_HUMAN	sp|P20618|PSB1_HUMAN	8	8	8	sp|P20618|PSB1_HUMAN Proteasome subunit beta type-1 OS=Homo sapiens OX=9606 GN=PSMB1 PE=1 SV=2	1	8	8	8	4	6	7	7	6	7	2	2	2	1	2	3	7	6	6	8	7	6	4	6	7	7	6	7	2	2	2	1	2	3	7	6	6	8	7	6	4	6	7	7
sp|P20645|MPRD_HUMAN	sp|P20645|MPRD_HUMAN	2	2	2	sp|P20645|MPRD_HUMAN Cation-dependent mannose-6-phosphate receptor OS=Homo sapiens OX=9606 GN=M6PR PE=1 SV=1	1	2	2	2	1	1	2	2	2	1	0	0	0	0	0	0	1	1	1	1	1	1	1	1	2	2	2	1	0	0	0	0	0	0	1	1	1	1	1	1	1	1	2	2
sp|P20674|COX5A_HUMAN	sp|P20674|COX5A_HUMAN	5	5	5	sp|P20674|COX5A_HUMAN Cytochrome c oxidase subunit 5A, mitochondrial OS=Homo sapiens OX=9606 GN=COX5A PE=1 SV=2	1	5	5	5	4	3	4	3	4	4	1	2	3	2	3	3	3	3	3	2	1	3	4	3	4	3	4	4	1	2	3	2	3	3	3	3	3	2	1	3	4	3	4	3
sp|P20700|LMNB1_HUMAN	sp|P20700|LMNB1_HUMAN	35	33	31	sp|P20700|LMNB1_HUMAN Lamin-B1 OS=Homo sapiens OX=9606 GN=LMNB1 PE=1 SV=2	1	35	33	31	22	20	23	21	21	22	12	12	12	14	15	15	19	15	19	18	18	18	21	19	22	20	20	21	10	10	10	12	13	13	18	15	18	17	17	17	21	19	22	20
sp|P20702|ITAX_HUMAN	sp|P20702|ITAX_HUMAN	1	1	1	sp|P20702|ITAX_HUMAN Integrin alpha-X OS=Homo sapiens OX=9606 GN=ITGAX PE=1 SV=3	1	1	1	1	0	0	1	0	0	0	0	0	0	0	0	0	0	0	0	1	1	0	0	0	1	0	0	0	0	0	0	0	0	0	0	0	0	1	1	0	0	0	1	0
sp|P20742|PZP_HUMAN	sp|P20742|PZP_HUMAN	11	4	4	sp|P20742|PZP_HUMAN Pregnancy zone protein OS=Homo sapiens OX=9606 GN=PZP PE=1 SV=4	1	11	4	4	5	4	3	2	2	5	6	6	6	5	6	7	2	0	3	2	3	2	2	1	1	1	1	2	0	0	0	0	0	0	0	0	0	0	0	0	2	1	1	1
sp|P20774|MIME_HUMAN	sp|P20774|MIME_HUMAN	11	11	11	sp|P20774|MIME_HUMAN Mimecan OS=Homo sapiens OX=9606 GN=OGN PE=1 SV=1	1	11	11	11	9	10	10	11	11	9	10	10	10	10	10	11	6	6	6	7	6	6	9	10	10	11	11	9	10	10	10	10	10	11	6	6	6	7	6	6	9	10	10	11
sp|P20810|ICAL_HUMAN	sp|P20810|ICAL_HUMAN	18	18	18	sp|P20810|ICAL_HUMAN Calpastatin OS=Homo sapiens OX=9606 GN=CAST PE=1 SV=4	1	18	18	18	6	7	7	5	8	5	7	8	8	11	9	8	11	9	11	9	10	11	6	7	7	5	8	5	7	8	8	11	9	8	11	9	11	9	10	11	6	7	7	5
sp|P20851|C4BPB_HUMAN	sp|P20851|C4BPB_HUMAN	4	4	4	sp|P20851|C4BPB_HUMAN C4b-binding protein beta chain OS=Homo sapiens OX=9606 GN=C4BPB PE=1 SV=1	1	4	4	4	1	1	2	1	2	2	0	0	0	0	0	0	2	1	1	1	1	1	1	1	2	1	2	2	0	0	0	0	0	0	2	1	1	1	1	1	1	1	2	1
sp|P20908|CO5A1_HUMAN	sp|P20908|CO5A1_HUMAN	4	4	4	sp|P20908|CO5A1_HUMAN Collagen alpha-1(V) chain OS=Homo sapiens OX=9606 GN=COL5A1 PE=1 SV=3	1	4	4	4	0	0	0	0	0	0	0	1	0	0	0	0	2	1	2	2	2	1	0	0	0	0	0	0	0	1	0	0	0	0	2	1	2	2	2	1	0	0	0	0
sp|P20930|FILA_HUMAN;CON__P20930	sp|P20930|FILA_HUMAN;CON__P20930	1;1	1;1	1;1	sp|P20930|FILA_HUMAN Filaggrin OS=Homo sapiens OX=9606 GN=FLG PE=1 SV=3;	2	1	1	1	0	0	0	0	0	0	1	1	1	1	1	1	0	0	0	0	0	0	0	0	0	0	0	0	1	1	1	1	1	1	0	0	0	0	0	0	0	0	0	0
sp|P20962|PTMS_HUMAN	sp|P20962|PTMS_HUMAN	2	2	2	sp|P20962|PTMS_HUMAN Parathymosin OS=Homo sapiens OX=9606 GN=PTMS PE=1 SV=2	1	2	2	2	2	1	1	1	1	2	1	1	0	0	1	0	0	0	0	0	0	0	2	1	1	1	1	2	1	1	0	0	1	0	0	0	0	0	0	0	2	1	1	1
sp|P21128|ENDOU_HUMAN	sp|P21128|ENDOU_HUMAN	3	3	3	sp|P21128|ENDOU_HUMAN Poly(U)-specific endoribonuclease OS=Homo sapiens OX=9606 GN=ENDOU PE=1 SV=2	1	3	3	3	0	1	1	2	2	2	0	1	0	1	1	1	0	0	0	0	0	0	0	1	1	2	2	2	0	1	0	1	1	1	0	0	0	0	0	0	0	1	1	2
sp|P21246|PTN_HUMAN	sp|P21246|PTN_HUMAN	1	1	1	sp|P21246|PTN_HUMAN Pleiotrophin OS=Homo sapiens OX=9606 GN=PTN PE=1 SV=1	1	1	1	1	0	0	0	0	0	0	1	1	0	1	0	1	0	0	0	0	0	0	0	0	0	0	0	0	1	1	0	1	0	1	0	0	0	0	0	0	0	0	0	0
sp|P21266|GSTM3_HUMAN	sp|P21266|GSTM3_HUMAN	12	12	11	sp|P21266|GSTM3_HUMAN Glutathione S-transferase Mu 3 OS=Homo sapiens OX=9606 GN=GSTM3 PE=1 SV=3	1	12	12	11	3	4	3	3	4	5	9	8	9	10	10	8	5	4	4	5	4	3	3	4	3	3	4	5	9	8	9	10	10	8	5	4	4	5	4	3	3	4	3	3
sp|P21281|VATB2_HUMAN;sp|P15313|VATB1_HUMAN	sp|P21281|VATB2_HUMAN	17;5	17;5	17;5	sp|P21281|VATB2_HUMAN V-type proton ATPase subunit B, brain isoform OS=Homo sapiens OX=9606 GN=ATP6V1B2 PE=1 SV=3	2	17	17	17	13	13	11	13	13	13	8	9	8	6	8	6	13	12	11	14	11	13	13	13	11	13	13	13	8	9	8	6	8	6	13	12	11	14	11	13	13	13	11	13
sp|P21283|VATC1_HUMAN	sp|P21283|VATC1_HUMAN	9	9	9	sp|P21283|VATC1_HUMAN V-type proton ATPase subunit C 1 OS=Homo sapiens OX=9606 GN=ATP6V1C1 PE=1 SV=4	1	9	9	9	4	6	5	5	5	6	0	0	1	1	0	0	4	4	4	3	3	6	4	6	5	5	5	6	0	0	1	1	0	0	4	4	4	3	3	6	4	6	5	5
sp|P21291|CSRP1_HUMAN	sp|P21291|CSRP1_HUMAN	11	11	11	sp|P21291|CSRP1_HUMAN Cysteine and glycine-rich protein 1 OS=Homo sapiens OX=9606 GN=CSRP1 PE=1 SV=3	1	11	11	11	10	10	11	11	10	11	9	8	10	9	9	10	6	7	7	6	7	6	10	10	11	11	10	11	9	8	10	9	9	10	6	7	7	6	7	6	10	10	11	11
sp|P21333|FLNA_HUMAN	sp|P21333|FLNA_HUMAN	120	120	107	sp|P21333|FLNA_HUMAN Filamin-A OS=Homo sapiens OX=9606 GN=FLNA PE=1 SV=4	1	120	120	107	89	91	88	93	86	88	87	90	92	94	93	91	96	99	97	95	93	98	89	91	88	93	86	88	87	90	92	94	93	91	96	99	97	95	93	98	81	84	81	85
sp|P21397|AOFA_HUMAN	sp|P21397|AOFA_HUMAN	4	3	3	sp|P21397|AOFA_HUMAN Amine oxidase [flavin-containing] A OS=Homo sapiens OX=9606 GN=MAOA PE=1 SV=1	1	4	3	3	0	0	1	0	0	0	0	1	1	0	1	0	1	1	1	1	1	2	0	0	0	0	0	0	0	1	1	0	1	0	1	1	1	1	1	2	0	0	0	0
sp|P21399|ACOC_HUMAN	sp|P21399|ACOC_HUMAN	20	20	20	sp|P21399|ACOC_HUMAN Cytoplasmic aconitate hydratase OS=Homo sapiens OX=9606 GN=ACO1 PE=1 SV=3	1	20	20	20	2	2	3	1	2	3	6	6	7	8	7	7	13	12	10	14	13	12	2	2	3	1	2	3	6	6	7	8	7	7	13	12	10	14	13	12	2	2	3	1
sp|P21589|5NTD_HUMAN	sp|P21589|5NTD_HUMAN	12	12	12	sp|P21589|5NTD_HUMAN 5-nucleotidase OS=Homo sapiens OX=9606 GN=NT5E PE=1 SV=1	1	12	12	12	0	0	0	0	0	0	8	10	9	10	9	12	1	1	0	1	0	0	0	0	0	0	0	0	8	10	9	10	9	12	1	1	0	1	0	0	0	0	0	0
sp|P21796|VDAC1_HUMAN	sp|P21796|VDAC1_HUMAN	18	18	18	sp|P21796|VDAC1_HUMAN Voltage-dependent anion-selective channel protein 1 OS=Homo sapiens OX=9606 GN=VDAC1 PE=1 SV=2	1	18	18	18	12	15	13	13	15	13	11	10	12	13	9	11	16	16	16	15	16	13	12	15	13	13	15	13	11	10	12	13	9	11	16	16	16	15	16	13	12	15	13	13
sp|P21810|PGS1_HUMAN	sp|P21810|PGS1_HUMAN	14	13	13	sp|P21810|PGS1_HUMAN Biglycan OS=Homo sapiens OX=9606 GN=BGN PE=1 SV=2	1	14	13	13	7	8	10	9	10	9	13	14	13	13	13	14	9	10	8	11	10	11	6	8	9	8	9	8	12	13	12	12	12	13	8	9	8	10	9	10	6	8	9	8
sp|P21912|SDHB_HUMAN	sp|P21912|SDHB_HUMAN	4	4	4	sp|P21912|SDHB_HUMAN Succinate dehydrogenase [ubiquinone] iron-sulfur subunit, mitochondrial OS=Homo sapiens OX=9606 GN=SDHB PE=1 SV=3	1	4	4	4	2	2	2	2	2	2	1	1	2	2	1	2	2	1	1	2	1	2	2	2	2	2	2	2	1	1	2	2	1	2	2	1	1	2	1	2	2	2	2	2
sp|P21926|CD9_HUMAN	sp|P21926|CD9_HUMAN	5	5	5	sp|P21926|CD9_HUMAN CD9 antigen OS=Homo sapiens OX=9606 GN=CD9 PE=1 SV=4	1	5	5	5	5	5	5	3	5	4	1	2	3	2	3	2	5	4	4	5	4	5	5	5	5	3	5	4	1	2	3	2	3	2	5	4	4	5	4	5	5	5	5	3
sp|P21953|ODBB_HUMAN	sp|P21953|ODBB_HUMAN	4	4	4	sp|P21953|ODBB_HUMAN 2-oxoisovalerate dehydrogenase subunit beta, mitochondrial OS=Homo sapiens OX=9606 GN=BCKDHB PE=1 SV=2	1	4	4	4	1	1	2	2	2	2	1	1	1	1	2	1	2	1	1	1	1	1	1	1	2	2	2	2	1	1	1	1	2	1	2	1	1	1	1	1	1	1	2	2
sp|P21964|COMT_HUMAN	sp|P21964|COMT_HUMAN	13	13	13	sp|P21964|COMT_HUMAN Catechol O-methyltransferase OS=Homo sapiens OX=9606 GN=COMT PE=1 SV=2	1	13	13	13	9	11	9	10	9	9	5	5	5	4	6	5	8	8	9	7	7	9	9	11	9	10	9	9	5	5	5	4	6	5	8	8	9	7	7	9	9	11	9	10
sp|P21980|TGM2_HUMAN	sp|P21980|TGM2_HUMAN	29	29	28	sp|P21980|TGM2_HUMAN Protein-glutamine gamma-glutamyltransferase 2 OS=Homo sapiens OX=9606 GN=TGM2 PE=1 SV=2	1	29	29	28	19	17	16	15	17	17	20	19	17	22	20	19	20	19	18	19	23	17	19	17	16	15	17	17	20	19	17	22	20	19	20	19	18	19	23	17	18	16	15	15
sp|P22033|MUTA_HUMAN	sp|P22033|MUTA_HUMAN	1	1	1	sp|P22033|MUTA_HUMAN Methylmalonyl-CoA mutase, mitochondrial OS=Homo sapiens OX=9606 GN=MMUT PE=1 SV=4	1	1	1	1	0	0	0	0	0	0	0	0	0	0	0	0	0	1	0	0	0	0	0	0	0	0	0	0	0	0	0	0	0	0	0	1	0	0	0	0	0	0	0	0
sp|P22059|OSBP1_HUMAN;sp|Q969R2|OSBP2_HUMAN	sp|P22059|OSBP1_HUMAN	7;1	7;1	7;1	sp|P22059|OSBP1_HUMAN Oxysterol-binding protein 1 OS=Homo sapiens OX=9606 GN=OSBP PE=1 SV=1	2	7	7	7	2	2	1	2	0	2	0	0	0	0	0	0	3	1	2	4	3	2	2	2	1	2	0	2	0	0	0	0	0	0	3	1	2	4	3	2	2	2	1	2
sp|P22061|PIMT_HUMAN	sp|P22061|PIMT_HUMAN	9	9	9	sp|P22061|PIMT_HUMAN Protein-L-isoaspartate(D-aspartate) O-methyltransferase OS=Homo sapiens OX=9606 GN=PCMT1 PE=1 SV=4	1	9	9	9	5	4	4	5	4	5	4	4	4	4	5	4	5	4	4	5	4	5	5	4	4	5	4	5	4	4	4	4	5	4	5	4	4	5	4	5	5	4	4	5
sp|P22087|FBRL_HUMAN	sp|P22087|FBRL_HUMAN	10	10	9	sp|P22087|FBRL_HUMAN rRNA 2-O-methyltransferase fibrillarin OS=Homo sapiens OX=9606 GN=FBL PE=1 SV=2	1	10	10	9	6	8	8	7	7	7	1	2	2	0	1	2	1	3	3	3	3	4	6	8	8	7	7	7	1	2	2	0	1	2	1	3	3	3	3	4	5	7	7	6
sp|P22102|PUR2_HUMAN	sp|P22102|PUR2_HUMAN	24	24	24	sp|P22102|PUR2_HUMAN Trifunctional purine biosynthetic protein adenosine-3 OS=Homo sapiens OX=9606 GN=GART PE=1 SV=1	1	24	24	24	9	9	9	9	8	10	2	1	2	2	3	3	18	17	17	15	18	16	9	9	9	9	8	10	2	1	2	2	3	3	18	17	17	15	18	16	9	9	9	9
sp|P22105|TENX_HUMAN;sp|Q16473|TENXA_HUMAN;REV__sp|Q96CG3|TIFA_HUMAN	sp|P22105|TENX_HUMAN	80;8;1	80;8;1	80;8;1	sp|P22105|TENX_HUMAN Tenascin-X OS=Homo sapiens OX=9606 GN=TNXB PE=1 SV=5	3	80	80	80	4	6	3	7	5	5	62	59	68	62	64	64	0	0	1	1	0	0	4	6	3	7	5	5	62	59	68	62	64	64	0	0	1	1	0	0	4	6	3	7
sp|P22223|CADH3_HUMAN	sp|P22223|CADH3_HUMAN	8	7	7	sp|P22223|CADH3_HUMAN Cadherin-3 OS=Homo sapiens OX=9606 GN=CDH3 PE=1 SV=2	1	8	7	7	4	4	5	5	4	5	0	0	0	0	0	0	7	6	6	6	7	7	3	3	4	4	4	4	0	0	0	0	0	0	6	5	5	5	6	6	3	3	4	4
sp|P22234|PUR6_HUMAN	sp|P22234|PUR6_HUMAN	18	18	18	sp|P22234|PUR6_HUMAN Multifunctional protein ADE2 OS=Homo sapiens OX=9606 GN=PAICS PE=1 SV=3	1	18	18	18	12	11	11	10	10	11	4	2	3	4	6	5	12	11	10	11	8	12	12	11	11	10	10	11	4	2	3	4	6	5	12	11	10	11	8	12	12	11	11	10
sp|P22307|SCP2_HUMAN	sp|P22307|SCP2_HUMAN	12	12	12	sp|P22307|SCP2_HUMAN Sterol carrier protein 2 OS=Homo sapiens OX=9606 GN=SCP2 PE=1 SV=2	1	12	12	12	7	6	7	9	9	6	5	4	3	4	3	4	9	6	8	7	9	7	7	6	7	9	9	6	5	4	3	4	3	4	9	6	8	7	9	7	7	6	7	9
sp|P22314|UBA1_HUMAN	sp|P22314|UBA1_HUMAN	39	39	39	sp|P22314|UBA1_HUMAN Ubiquitin-like modifier-activating enzyme 1 OS=Homo sapiens OX=9606 GN=UBA1 PE=1 SV=3	1	39	39	39	25	28	28	26	29	29	17	16	20	19	20	18	24	28	28	29	26	26	25	28	28	26	29	29	17	16	20	19	20	18	24	28	28	29	26	26	25	28	28	26
sp|P22352|GPX3_HUMAN	sp|P22352|GPX3_HUMAN	5	5	5	sp|P22352|GPX3_HUMAN Glutathione peroxidase 3 OS=Homo sapiens OX=9606 GN=GPX3 PE=1 SV=2	1	5	5	5	3	2	3	2	3	3	4	4	5	4	5	4	2	2	2	1	2	3	3	2	3	2	3	3	4	4	5	4	5	4	2	2	2	1	2	3	3	2	3	2
sp|P22392|NDKB_HUMAN;sp|O60361|NDK8_HUMAN	sp|P22392|NDKB_HUMAN;sp|O60361|NDK8_HUMAN	9;6	9;6	5;4	sp|P22392|NDKB_HUMAN Nucleoside diphosphate kinase B OS=Homo sapiens OX=9606 GN=NME2 PE=1 SV=1;sp|O60361|NDK8_HUMAN Putative nucleoside diphosphate kinase OS=Homo sapiens OX=9606 GN=NME2P1 PE=5 SV=1	2	9	9	5	7	8	7	8	7	8	7	5	7	8	7	7	8	8	7	8	8	7	7	8	7	8	7	8	7	5	7	8	7	7	8	8	7	8	8	7	3	4	3	4
sp|P22528|SPR1B_HUMAN	sp|P22528|SPR1B_HUMAN	3	3	1	sp|P22528|SPR1B_HUMAN Cornifin-B OS=Homo sapiens OX=9606 GN=SPRR1B PE=1 SV=2	1	3	3	1	2	2	3	2	3	2	3	3	3	3	3	3	2	3	3	3	3	3	2	2	3	2	3	2	3	3	3	3	3	3	2	3	3	3	3	3	1	1	1	1
sp|P22570|ADRO_HUMAN	sp|P22570|ADRO_HUMAN	11	11	11	sp|P22570|ADRO_HUMAN NADPH:adrenodoxin oxidoreductase, mitochondrial OS=Homo sapiens OX=9606 GN=FDXR PE=1 SV=3	1	11	11	11	7	8	4	5	6	7	0	0	0	0	0	0	7	7	7	7	7	10	7	8	4	5	6	7	0	0	0	0	0	0	7	7	7	7	7	10	7	8	4	5
sp|P22612|KAPCG_HUMAN	sp|P22612|KAPCG_HUMAN	3	1	1	sp|P22612|KAPCG_HUMAN cAMP-dependent protein kinase catalytic subunit gamma OS=Homo sapiens OX=9606 GN=PRKACG PE=1 SV=3	1	3	1	1	2	2	2	2	2	1	1	1	2	1	1	1	1	2	2	3	3	2	1	1	1	1	1	0	1	0	1	1	1	0	0	1	1	1	1	1	1	1	1	1
sp|P22626|ROA2_HUMAN	sp|P22626|ROA2_HUMAN	22	22	21	sp|P22626|ROA2_HUMAN Heterogeneous nuclear ribonucleoproteins A2/B1 OS=Homo sapiens OX=9606 GN=HNRNPA2B1 PE=1 SV=2	1	22	22	21	19	18	18	18	18	18	18	16	18	16	15	15	19	19	19	20	19	18	19	18	18	18	18	18	18	16	18	16	15	15	19	19	19	20	19	18	18	17	17	17
sp|P22676|CALB2_HUMAN	sp|P22676|CALB2_HUMAN	1	1	1	sp|P22676|CALB2_HUMAN Calretinin OS=Homo sapiens OX=9606 GN=CALB2 PE=2 SV=2	1	1	1	1	0	0	0	0	0	0	0	0	0	0	0	0	0	0	0	0	0	1	0	0	0	0	0	0	0	0	0	0	0	0	0	0	0	0	0	1	0	0	0	0
sp|P22694|KAPCB_HUMAN	sp|P22694|KAPCB_HUMAN	6	1	1	sp|P22694|KAPCB_HUMAN cAMP-dependent protein kinase catalytic subunit beta OS=Homo sapiens OX=9606 GN=PRKACB PE=1 SV=2	1	6	1	1	2	3	3	2	4	3	0	1	2	0	0	2	2	2	2	5	5	3	0	0	0	0	1	0	0	0	0	0	0	0	0	0	0	1	0	0	0	0	0	0
sp|P22695|QCR2_HUMAN	sp|P22695|QCR2_HUMAN	14	14	14	sp|P22695|QCR2_HUMAN Cytochrome b-c1 complex subunit 2, mitochondrial OS=Homo sapiens OX=9606 GN=UQCRC2 PE=1 SV=3	1	14	14	14	11	10	12	11	11	10	6	7	5	6	8	9	12	11	10	9	11	10	11	10	12	11	11	10	6	7	5	6	8	9	12	11	10	9	11	10	11	10	12	11
sp|P22735|TGM1_HUMAN	sp|P22735|TGM1_HUMAN	3	3	3	sp|P22735|TGM1_HUMAN Protein-glutamine gamma-glutamyltransferase K OS=Homo sapiens OX=9606 GN=TGM1 PE=1 SV=4	1	3	3	3	0	0	0	0	0	0	2	2	2	1	1	2	1	2	0	1	1	0	0	0	0	0	0	0	2	2	2	1	1	2	1	2	0	1	1	0	0	0	0	0
sp|P22894|MMP8_HUMAN	sp|P22894|MMP8_HUMAN	1	1	1	sp|P22894|MMP8_HUMAN Neutrophil collagenase OS=Homo sapiens OX=9606 GN=MMP8 PE=1 SV=1	1	1	1	1	0	0	0	1	0	1	0	0	0	0	0	0	1	1	1	1	1	1	0	0	0	1	0	1	0	0	0	0	0	0	1	1	1	1	1	1	0	0	0	1
sp|P22914|CRYGS_HUMAN	sp|P22914|CRYGS_HUMAN	6	6	6	sp|P22914|CRYGS_HUMAN Gamma-crystallin S OS=Homo sapiens OX=9606 GN=CRYGS PE=1 SV=4	1	6	6	6	0	0	0	0	0	0	0	0	0	0	0	0	3	3	3	4	4	3	0	0	0	0	0	0	0	0	0	0	0	0	3	3	3	4	4	3	0	0	0	0
sp|P23083|HV102_HUMAN;sp|A0A0C4DH31|HV118_HUMAN	sp|P23083|HV102_HUMAN;sp|A0A0C4DH31|HV118_HUMAN	1;1	1;1	1;1	sp|P23083|HV102_HUMAN Immunoglobulin heavy variable 1-2 OS=Homo sapiens OX=9606 GN=IGHV1-2 PE=1 SV=2;sp|A0A0C4DH31|HV118_HUMAN Immunoglobulin heavy variable 1-18 OS=Homo sapiens OX=9606 GN=IGHV1-18 PE=3 SV=1	2	1	1	1	1	1	1	1	1	0	0	0	0	1	1	0	1	1	1	1	0	1	1	1	1	1	1	0	0	0	0	1	1	0	1	1	1	1	0	1	1	1	1	1
sp|P23141|EST1_HUMAN;sp|Q9UKY3|CES1P_HUMAN	sp|P23141|EST1_HUMAN	12;2	12;2	12;2	sp|P23141|EST1_HUMAN Liver carboxylesterase 1 OS=Homo sapiens OX=9606 GN=CES1 PE=1 SV=2	2	12	12	12	7	8	7	7	9	10	1	1	1	0	0	1	0	0	0	0	1	0	7	8	7	7	9	10	1	1	1	0	0	1	0	0	0	0	1	0	7	8	7	7
sp|P23142|FBLN1_HUMAN	sp|P23142|FBLN1_HUMAN	26	26	14	sp|P23142|FBLN1_HUMAN Fibulin-1 OS=Homo sapiens OX=9606 GN=FBLN1 PE=1 SV=4	1	26	26	14	16	15	15	16	14	15	25	24	24	24	25	24	12	14	14	11	12	11	16	15	15	16	14	15	25	24	24	24	25	24	12	14	14	11	12	11	9	8	7	8
sp|P23193|TCEA1_HUMAN	sp|P23193|TCEA1_HUMAN	7	7	7	sp|P23193|TCEA1_HUMAN Transcription elongation factor A protein 1 OS=Homo sapiens OX=9606 GN=TCEA1 PE=1 SV=2	1	7	7	7	1	1	0	0	0	0	1	0	1	1	1	0	1	2	3	2	2	2	1	1	0	0	0	0	1	0	1	1	1	0	1	2	3	2	2	2	1	1	0	0
sp|P23219|PGH1_HUMAN;sp|P35354|PGH2_HUMAN	sp|P23219|PGH1_HUMAN	4;1	4;1	4;1	sp|P23219|PGH1_HUMAN Prostaglandin G/H synthase 1 OS=Homo sapiens OX=9606 GN=PTGS1 PE=1 SV=2	2	4	4	4	4	4	2	4	4	3	0	1	1	1	1	1	2	3	2	2	2	3	4	4	2	4	4	3	0	1	1	1	1	1	2	3	2	2	2	3	4	4	2	4
sp|P23229|ITA6_HUMAN	sp|P23229|ITA6_HUMAN	19	19	19	sp|P23229|ITA6_HUMAN Integrin alpha-6 OS=Homo sapiens OX=9606 GN=ITGA6 PE=1 SV=5	1	19	19	19	9	10	8	11	11	11	7	7	8	10	7	8	6	6	8	8	7	9	9	10	8	11	11	11	7	7	8	10	7	8	6	6	8	8	7	9	9	10	8	11
sp|P23246|SFPQ_HUMAN	sp|P23246|SFPQ_HUMAN	20	20	19	sp|P23246|SFPQ_HUMAN Splicing factor, proline- and glutamine-rich OS=Homo sapiens OX=9606 GN=SFPQ PE=1 SV=2	1	20	20	19	12	13	13	16	12	12	5	4	7	5	5	6	11	14	13	14	13	13	12	13	13	16	12	12	5	4	7	5	5	6	11	14	13	14	13	13	11	12	12	15
sp|P23258|TBG1_HUMAN;sp|Q9NRH3|TBG2_HUMAN	sp|P23258|TBG1_HUMAN;sp|Q9NRH3|TBG2_HUMAN	9;7	9;7	9;7	sp|P23258|TBG1_HUMAN Tubulin gamma-1 chain OS=Homo sapiens OX=9606 GN=TUBG1 PE=1 SV=2;sp|Q9NRH3|TBG2_HUMAN Tubulin gamma-2 chain OS=Homo sapiens OX=9606 GN=TUBG2 PE=2 SV=1	2	9	9	9	0	1	1	1	1	2	0	0	0	0	0	0	3	5	3	2	3	1	0	1	1	1	1	2	0	0	0	0	0	0	3	5	3	2	3	1	0	1	1	1
sp|P23284|PPIB_HUMAN	sp|P23284|PPIB_HUMAN	12	12	12	sp|P23284|PPIB_HUMAN Peptidyl-prolyl cis-trans isomerase B OS=Homo sapiens OX=9606 GN=PPIB PE=1 SV=2	1	12	12	12	12	12	12	12	12	11	11	10	10	11	11	11	12	12	12	12	12	12	12	12	12	12	12	11	11	10	10	11	11	11	12	12	12	12	12	12	12	12	12	12
sp|P23297|S10A1_HUMAN	sp|P23297|S10A1_HUMAN	1	1	1	sp|P23297|S10A1_HUMAN Protein S100-A1 OS=Homo sapiens OX=9606 GN=S100A1 PE=1 SV=2	1	1	1	1	1	0	1	1	0	1	0	0	0	0	0	0	0	0	0	0	0	0	1	0	1	1	0	1	0	0	0	0	0	0	0	0	0	0	0	0	1	0	1	1
sp|P23368|MAOM_HUMAN	sp|P23368|MAOM_HUMAN	9	9	9	sp|P23368|MAOM_HUMAN NAD-dependent malic enzyme, mitochondrial OS=Homo sapiens OX=9606 GN=ME2 PE=1 SV=1	1	9	9	9	5	4	5	4	7	5	0	1	2	0	1	0	5	3	5	5	4	3	5	4	5	4	7	5	0	1	2	0	1	0	5	3	5	5	4	3	5	4	5	4
sp|P23381|SYWC_HUMAN	sp|P23381|SYWC_HUMAN	15	15	15	sp|P23381|SYWC_HUMAN Tryptophan--tRNA ligase, cytoplasmic OS=Homo sapiens OX=9606 GN=WARS1 PE=1 SV=2	1	15	15	15	4	4	4	6	5	4	3	3	4	0	3	1	9	8	6	9	11	10	4	4	4	6	5	4	3	3	4	0	3	1	9	8	6	9	11	10	4	4	4	6
sp|P23396|RS3_HUMAN	sp|P23396|RS3_HUMAN	13	13	13	sp|P23396|RS3_HUMAN 40S ribosomal protein S3 OS=Homo sapiens OX=9606 GN=RPS3 PE=1 SV=2	1	13	13	13	8	9	8	11	10	9	10	10	10	9	11	10	9	11	8	10	9	11	8	9	8	11	10	9	10	10	10	9	11	10	9	11	8	10	9	11	8	9	8	11
sp|P23434|GCSH_HUMAN	sp|P23434|GCSH_HUMAN	1	1	1	sp|P23434|GCSH_HUMAN Glycine cleavage system H protein, mitochondrial OS=Homo sapiens OX=9606 GN=GCSH PE=1 SV=2	1	1	1	1	1	1	1	1	1	1	0	1	1	0	0	1	0	1	0	1	1	0	1	1	1	1	1	1	0	1	1	0	0	1	0	1	0	1	1	0	1	1	1	1
sp|P23469|PTPRE_HUMAN	sp|P23469|PTPRE_HUMAN	1	1	1	sp|P23469|PTPRE_HUMAN Receptor-type tyrosine-protein phosphatase epsilon OS=Homo sapiens OX=9606 GN=PTPRE PE=1 SV=1	1	1	1	1	1	0	1	0	1	0	0	0	0	0	0	0	0	0	0	0	0	0	1	0	1	0	1	0	0	0	0	0	0	0	0	0	0	0	0	0	1	0	1	0
sp|P23497|SP100_HUMAN;sp|Q9H930|SP14L_HUMAN	sp|P23497|SP100_HUMAN	4;1	2;1	2;1	sp|P23497|SP100_HUMAN Nuclear autoantigen Sp-100 OS=Homo sapiens OX=9606 GN=SP100 PE=1 SV=3	2	4	2	2	0	0	1	0	0	1	1	1	0	1	1	0	2	2	1	2	3	1	0	0	0	0	0	0	0	0	0	0	0	0	2	2	1	2	2	1	0	0	0	0
sp|P23526|SAHH_HUMAN	sp|P23526|SAHH_HUMAN	16	16	16	sp|P23526|SAHH_HUMAN Adenosylhomocysteinase OS=Homo sapiens OX=9606 GN=AHCY PE=1 SV=4	1	16	16	16	10	11	10	10	11	10	7	8	9	9	7	7	9	11	11	10	9	11	10	11	10	10	11	10	7	8	9	9	7	7	9	11	11	10	9	11	10	11	10	10
sp|P23528|COF1_HUMAN	sp|P23528|COF1_HUMAN	15	15	11	sp|P23528|COF1_HUMAN Cofilin-1 OS=Homo sapiens OX=9606 GN=CFL1 PE=1 SV=3	1	15	15	11	10	10	10	10	10	9	11	10	11	9	10	10	9	11	10	10	10	11	10	10	10	10	10	9	11	10	11	9	10	10	9	11	10	10	10	11	8	8	8	8
sp|P23588|IF4B_HUMAN	sp|P23588|IF4B_HUMAN	4	4	4	sp|P23588|IF4B_HUMAN Eukaryotic translation initiation factor 4B OS=Homo sapiens OX=9606 GN=EIF4B PE=1 SV=2	1	4	4	4	2	3	3	2	3	3	2	3	3	2	3	2	3	3	4	4	3	3	2	3	3	2	3	3	2	3	3	2	3	2	3	3	4	4	3	3	2	3	3	2
sp|P23610|HAP40_HUMAN	sp|P23610|HAP40_HUMAN	1	1	1	sp|P23610|HAP40_HUMAN 40-kDa huntingtin-associated protein OS=Homo sapiens OX=9606 GN=F8A1 PE=1 SV=2	1	1	1	1	1	1	0	0	1	1	0	0	0	0	0	0	0	0	0	0	0	0	1	1	0	0	1	1	0	0	0	0	0	0	0	0	0	0	0	0	1	1	0	0
sp|P23634|AT2B4_HUMAN	sp|P23634|AT2B4_HUMAN	20	20	11	sp|P23634|AT2B4_HUMAN Plasma membrane calcium-transporting ATPase 4 OS=Homo sapiens OX=9606 GN=ATP2B4 PE=1 SV=2	1	20	20	11	12	15	12	16	13	14	3	5	4	3	2	5	5	4	7	8	8	6	12	15	12	16	13	14	3	5	4	3	2	5	5	4	7	8	8	6	5	7	7	8
sp|P23743|DGKA_HUMAN	sp|P23743|DGKA_HUMAN	9	9	9	sp|P23743|DGKA_HUMAN Diacylglycerol kinase alpha OS=Homo sapiens OX=9606 GN=DGKA PE=1 SV=3	1	9	9	9	0	0	0	0	0	0	1	1	1	1	0	1	4	3	4	5	5	5	0	0	0	0	0	0	1	1	1	1	0	1	4	3	4	5	5	5	0	0	0	0
sp|P23786|CPT2_HUMAN	sp|P23786|CPT2_HUMAN	10	10	10	sp|P23786|CPT2_HUMAN Carnitine O-palmitoyltransferase 2, mitochondrial OS=Homo sapiens OX=9606 GN=CPT2 PE=1 SV=2	1	10	10	10	7	6	8	5	7	8	0	0	0	0	0	0	0	1	1	1	3	3	7	6	8	5	7	8	0	0	0	0	0	0	0	1	1	1	3	3	7	6	8	5
sp|P23919|KTHY_HUMAN	sp|P23919|KTHY_HUMAN	1	1	1	sp|P23919|KTHY_HUMAN Thymidylate kinase OS=Homo sapiens OX=9606 GN=DTYMK PE=1 SV=4	1	1	1	1	1	0	0	0	1	1	0	0	0	0	0	0	0	1	1	1	0	1	1	0	0	0	1	1	0	0	0	0	0	0	0	1	1	1	0	1	1	0	0	0
sp|P23921|RIR1_HUMAN	sp|P23921|RIR1_HUMAN	9	9	9	sp|P23921|RIR1_HUMAN Ribonucleoside-diphosphate reductase large subunit OS=Homo sapiens OX=9606 GN=RRM1 PE=1 SV=1	1	9	9	9	2	3	2	1	4	1	0	1	1	1	1	2	3	5	4	5	6	5	2	3	2	1	4	1	0	1	1	1	1	2	3	5	4	5	6	5	2	3	2	1
sp|P23946|CMA1_HUMAN	sp|P23946|CMA1_HUMAN	9	9	9	sp|P23946|CMA1_HUMAN Chymase OS=Homo sapiens OX=9606 GN=CMA1 PE=1 SV=1	1	9	9	9	1	1	0	1	1	0	8	7	7	6	6	7	0	1	1	1	1	0	1	1	0	1	1	0	8	7	7	6	6	7	0	1	1	1	1	0	1	1	0	1
sp|P24043|LAMA2_HUMAN	sp|P24043|LAMA2_HUMAN	6	6	6	sp|P24043|LAMA2_HUMAN Laminin subunit alpha-2 OS=Homo sapiens OX=9606 GN=LAMA2 PE=1 SV=4	1	6	6	6	1	1	0	0	0	0	0	1	1	1	1	1	2	1	2	2	1	1	1	1	0	0	0	0	0	1	1	1	1	1	2	1	2	2	1	1	1	1	0	0
sp|P24158|PRTN3_HUMAN	sp|P24158|PRTN3_HUMAN	5	5	5	sp|P24158|PRTN3_HUMAN Myeloblastin OS=Homo sapiens OX=9606 GN=PRTN3 PE=1 SV=3	1	5	5	5	2	2	3	2	2	3	2	3	1	1	1	2	2	1	0	2	2	2	2	2	3	2	2	3	2	3	1	1	1	2	2	1	0	2	2	2	2	2	3	2
sp|P24390|ERD21_HUMAN;sp|P33947|ERD22_HUMAN	sp|P24390|ERD21_HUMAN	3;1	3;1	3;1	sp|P24390|ERD21_HUMAN ER lumen protein-retaining receptor 1 OS=Homo sapiens OX=9606 GN=KDELR1 PE=1 SV=1	2	3	3	3	3	3	3	2	2	3	0	0	0	0	0	0	2	2	3	3	3	3	3	3	3	2	2	3	0	0	0	0	0	0	2	2	3	3	3	3	3	3	3	2
sp|P24534|EF1B_HUMAN	sp|P24534|EF1B_HUMAN	6	5	5	sp|P24534|EF1B_HUMAN Elongation factor 1-beta OS=Homo sapiens OX=9606 GN=EEF1B2 PE=1 SV=3	1	6	5	5	4	4	4	3	5	5	4	5	4	4	4	4	3	5	4	5	5	4	4	4	4	3	5	4	4	5	4	4	4	4	3	5	4	5	5	4	4	4	4	3
sp|P24539|AT5F1_HUMAN	sp|P24539|AT5F1_HUMAN	10	10	10	sp|P24539|AT5F1_HUMAN ATP synthase F(0) complex subunit B1, mitochondrial OS=Homo sapiens OX=9606 GN=ATP5PB PE=1 SV=2	1	10	10	10	8	7	8	6	7	8	2	2	2	2	2	3	4	3	4	4	4	4	8	7	8	6	7	8	2	2	2	2	2	3	4	3	4	4	4	4	8	7	8	6
sp|P24557|THAS_HUMAN	sp|P24557|THAS_HUMAN	3	3	3	sp|P24557|THAS_HUMAN Thromboxane-A synthase OS=Homo sapiens OX=9606 GN=TBXAS1 PE=1 SV=3	1	3	3	3	1	2	1	3	3	3	0	1	0	0	1	1	1	2	1	2	1	2	1	2	1	3	3	3	0	1	0	0	1	1	1	2	1	2	1	2	1	2	1	3
sp|P24666|PPAC_HUMAN	sp|P24666|PPAC_HUMAN	7	7	7	sp|P24666|PPAC_HUMAN Low molecular weight phosphotyrosine protein phosphatase OS=Homo sapiens OX=9606 GN=ACP1 PE=1 SV=3	1	7	7	7	3	2	3	3	3	3	2	1	1	1	1	2	4	5	5	2	3	2	3	2	3	3	3	3	2	1	1	1	1	2	4	5	5	2	3	2	3	2	3	3
sp|P24752|THIL_HUMAN	sp|P24752|THIL_HUMAN	14	14	14	sp|P24752|THIL_HUMAN Acetyl-CoA acetyltransferase, mitochondrial OS=Homo sapiens OX=9606 GN=ACAT1 PE=1 SV=1	1	14	14	14	10	10	10	9	10	8	9	10	10	10	9	10	7	8	9	9	10	8	10	10	10	9	10	8	9	10	10	10	9	10	7	8	9	9	10	8	10	10	10	9
sp|P24821|TENA_HUMAN	sp|P24821|TENA_HUMAN	66	66	66	sp|P24821|TENA_HUMAN Tenascin OS=Homo sapiens OX=9606 GN=TNC PE=1 SV=3	1	66	66	66	46	45	48	46	48	52	3	4	5	3	5	6	43	42	43	42	44	43	46	45	48	46	48	52	3	4	5	3	5	6	43	42	43	42	44	43	46	45	48	46
sp|P24844|MYL9_HUMAN	sp|P24844|MYL9_HUMAN	9	9	4	sp|P24844|MYL9_HUMAN Myosin regulatory light polypeptide 9 OS=Homo sapiens OX=9606 GN=MYL9 PE=1 SV=4	1	9	9	4	9	8	8	8	7	8	8	8	8	8	8	8	7	7	8	8	8	7	9	8	8	8	7	8	8	8	8	8	8	8	7	7	8	8	8	7	4	3	3	3
sp|P24928|RPB1_HUMAN	sp|P24928|RPB1_HUMAN	3	3	3	sp|P24928|RPB1_HUMAN DNA-directed RNA polymerase II subunit RPB1 OS=Homo sapiens OX=9606 GN=POLR2A PE=1 SV=2	1	3	3	3	1	0	1	2	2	1	0	0	0	0	0	0	0	1	0	1	0	1	1	0	1	2	2	1	0	0	0	0	0	0	0	1	0	1	0	1	1	0	1	2
sp|P24941|CDK2_HUMAN;sp|Q00526|CDK3_HUMAN	sp|P24941|CDK2_HUMAN;sp|Q00526|CDK3_HUMAN	4;2	3;1	3;1	sp|P24941|CDK2_HUMAN Cyclin-dependent kinase 2 OS=Homo sapiens OX=9606 GN=CDK2 PE=1 SV=2;sp|Q00526|CDK3_HUMAN Cyclin-dependent kinase 3 OS=Homo sapiens OX=9606 GN=CDK3 PE=1 SV=1	2	4	3	3	3	1	1	2	1	2	1	0	1	1	0	0	3	3	3	2	3	2	2	0	0	1	0	1	1	0	1	1	0	0	2	2	2	1	2	1	2	0	0	1
sp|P25098|ARBK1_HUMAN;sp|P35626|ARBK2_HUMAN	sp|P25098|ARBK1_HUMAN;sp|P35626|ARBK2_HUMAN	2;1	2;1	2;1	sp|P25098|ARBK1_HUMAN Beta-adrenergic receptor kinase 1 OS=Homo sapiens OX=9606 GN=GRK2 PE=1 SV=2;sp|P35626|ARBK2_HUMAN Beta-adrenergic receptor kinase 2 OS=Homo sapiens OX=9606 GN=GRK3 PE=1 SV=2	2	2	2	2	0	0	0	0	0	0	0	0	0	0	0	0	2	1	1	1	1	0	0	0	0	0	0	0	0	0	0	0	0	0	2	1	1	1	1	0	0	0	0	0
sp|P25205|MCM3_HUMAN	sp|P25205|MCM3_HUMAN	15	15	15	sp|P25205|MCM3_HUMAN DNA replication licensing factor MCM3 OS=Homo sapiens OX=9606 GN=MCM3 PE=1 SV=3	1	15	15	15	0	1	0	2	1	0	1	1	1	0	1	1	10	11	12	12	11	11	0	1	0	2	1	0	1	1	1	0	1	1	10	11	12	12	11	11	0	1	0	2
sp|P25311|ZA2G_HUMAN	sp|P25311|ZA2G_HUMAN	12	12	12	sp|P25311|ZA2G_HUMAN Zinc-alpha-2-glycoprotein OS=Homo sapiens OX=9606 GN=AZGP1 PE=1 SV=2	1	12	12	12	2	1	2	2	2	3	7	7	7	7	7	8	2	1	0	1	1	2	2	1	2	2	2	3	7	7	7	7	7	8	2	1	0	1	1	2	2	1	2	2
sp|P25325|THTM_HUMAN	sp|P25325|THTM_HUMAN	7	7	7	sp|P25325|THTM_HUMAN 3-mercaptopyruvate sulfurtransferase OS=Homo sapiens OX=9606 GN=MPST PE=1 SV=3	1	7	7	7	3	3	3	4	2	3	2	5	4	2	2	3	4	4	3	3	4	4	3	3	3	4	2	3	2	5	4	2	2	3	4	4	3	3	4	4	3	3	3	4
sp|P25398|RS12_HUMAN	sp|P25398|RS12_HUMAN	7	7	7	sp|P25398|RS12_HUMAN 40S ribosomal protein S12 OS=Homo sapiens OX=9606 GN=RPS12 PE=1 SV=3	1	7	7	7	6	6	6	7	6	6	6	7	6	7	7	7	6	7	6	6	6	6	6	6	6	7	6	6	6	7	6	7	7	7	6	7	6	6	6	6	6	6	6	7
sp|P25685|DNJB1_HUMAN	sp|P25685|DNJB1_HUMAN	14	14	13	sp|P25685|DNJB1_HUMAN DnaJ homolog subfamily B member 1 OS=Homo sapiens OX=9606 GN=DNAJB1 PE=1 SV=4	1	14	14	13	5	4	5	6	5	6	7	6	6	7	6	7	12	11	9	8	9	8	5	4	5	6	5	6	7	6	6	7	6	7	12	11	9	8	9	8	5	4	5	5
sp|P25686|DNJB2_HUMAN	sp|P25686|DNJB2_HUMAN	2	2	2	sp|P25686|DNJB2_HUMAN DnaJ homolog subfamily B member 2 OS=Homo sapiens OX=9606 GN=DNAJB2 PE=1 SV=3	1	2	2	2	0	0	0	0	0	0	1	0	0	0	0	0	0	2	0	0	0	0	0	0	0	0	0	0	1	0	0	0	0	0	0	2	0	0	0	0	0	0	0	0
sp|P25705|ATPA_HUMAN	sp|P25705|ATPA_HUMAN	26	26	26	sp|P25705|ATPA_HUMAN ATP synthase subunit alpha, mitochondrial OS=Homo sapiens OX=9606 GN=ATP5F1A PE=1 SV=1	1	26	26	26	20	19	18	19	19	19	18	19	18	18	19	17	18	19	19	18	19	18	20	19	18	19	19	19	18	19	18	18	19	17	18	19	19	18	19	18	20	19	18	19
sp|P25774|CATS_HUMAN	sp|P25774|CATS_HUMAN	5	5	5	sp|P25774|CATS_HUMAN Cathepsin S OS=Homo sapiens OX=9606 GN=CTSS PE=1 SV=3	1	5	5	5	4	4	3	3	3	3	0	0	0	0	0	0	1	1	2	1	1	1	4	4	3	3	3	3	0	0	0	0	0	0	1	1	2	1	1	1	4	4	3	3
sp|P25786|PSA1_HUMAN	sp|P25786|PSA1_HUMAN	10	10	10	sp|P25786|PSA1_HUMAN Proteasome subunit alpha type-1 OS=Homo sapiens OX=9606 GN=PSMA1 PE=1 SV=1	1	10	10	10	6	6	5	6	4	6	5	3	3	5	5	4	6	5	5	3	4	6	6	6	5	6	4	6	5	3	3	5	5	4	6	5	5	3	4	6	6	6	5	6
sp|P25787|PSA2_HUMAN	sp|P25787|PSA2_HUMAN	6	6	6	sp|P25787|PSA2_HUMAN Proteasome subunit alpha type-2 OS=Homo sapiens OX=9606 GN=PSMA2 PE=1 SV=2	1	6	6	6	4	4	4	4	4	4	1	2	2	2	4	3	5	5	4	5	5	5	4	4	4	4	4	4	1	2	2	2	4	3	5	5	4	5	5	5	4	4	4	4
sp|P25788|PSA3_HUMAN	sp|P25788|PSA3_HUMAN	10	10	10	sp|P25788|PSA3_HUMAN Proteasome subunit alpha type-3 OS=Homo sapiens OX=9606 GN=PSMA3 PE=1 SV=2	1	10	10	10	9	6	6	6	7	5	5	6	6	6	6	6	4	6	5	5	5	5	9	6	6	6	7	5	5	6	6	6	6	6	4	6	5	5	5	5	9	6	6	6
sp|P25789|PSA4_HUMAN	sp|P25789|PSA4_HUMAN	9	9	9	sp|P25789|PSA4_HUMAN Proteasome subunit alpha type-4 OS=Homo sapiens OX=9606 GN=PSMA4 PE=1 SV=1	1	9	9	9	4	7	7	5	6	6	4	3	3	3	5	4	5	7	5	6	6	6	4	7	7	5	6	6	4	3	3	3	5	4	5	7	5	6	6	6	4	7	7	5
sp|P25815|S100P_HUMAN	sp|P25815|S100P_HUMAN	1	1	1	sp|P25815|S100P_HUMAN Protein S100-P OS=Homo sapiens OX=9606 GN=S100P PE=1 SV=2	1	1	1	1	1	1	1	1	1	1	0	0	0	0	0	0	1	1	1	0	1	1	1	1	1	1	1	1	0	0	0	0	0	0	1	1	1	0	1	1	1	1	1	1
sp|P25940|CO5A3_HUMAN	sp|P25940|CO5A3_HUMAN	2	2	2	sp|P25940|CO5A3_HUMAN Collagen alpha-3(V) chain OS=Homo sapiens OX=9606 GN=COL5A3 PE=1 SV=3	1	2	2	2	0	0	0	0	0	0	1	0	0	0	2	1	1	0	0	0	0	0	0	0	0	0	0	0	1	0	0	0	2	1	1	0	0	0	0	0	0	0	0	0
sp|P26006|ITA3_HUMAN	sp|P26006|ITA3_HUMAN	4	4	4	sp|P26006|ITA3_HUMAN Integrin alpha-3 OS=Homo sapiens OX=9606 GN=ITGA3 PE=1 SV=5	1	4	4	4	0	1	2	2	2	3	0	0	0	0	0	0	0	0	0	0	0	0	0	1	2	2	2	3	0	0	0	0	0	0	0	0	0	0	0	0	0	1	2	2
sp|P26012|ITB8_HUMAN	sp|P26012|ITB8_HUMAN	2	2	2	sp|P26012|ITB8_HUMAN Integrin beta-8 OS=Homo sapiens OX=9606 GN=ITGB8 PE=1 SV=1	1	2	2	2	1	1	1	1	1	1	0	0	0	0	0	0	1	1	0	1	1	1	1	1	1	1	1	1	0	0	0	0	0	0	1	1	0	1	1	1	1	1	1	1
sp|P26038|MOES_HUMAN	sp|P26038|MOES_HUMAN	38	38	25	sp|P26038|MOES_HUMAN Moesin OS=Homo sapiens OX=9606 GN=MSN PE=1 SV=3	1	38	38	25	19	22	19	19	19	21	20	22	21	23	22	23	31	30	31	30	31	31	19	22	19	19	19	21	20	22	21	23	22	23	31	30	31	30	31	31	12	15	11	12
sp|P26196|DDX6_HUMAN	sp|P26196|DDX6_HUMAN	10	10	10	sp|P26196|DDX6_HUMAN Probable ATP-dependent RNA helicase DDX6 OS=Homo sapiens OX=9606 GN=DDX6 PE=1 SV=2	1	10	10	10	5	5	4	6	4	6	1	1	2	1	2	1	3	6	4	5	4	4	5	5	4	6	4	6	1	1	2	1	2	1	3	6	4	5	4	4	5	5	4	6
sp|P26232|CTNA2_HUMAN	sp|P26232|CTNA2_HUMAN	11	4	4	sp|P26232|CTNA2_HUMAN Catenin alpha-2 OS=Homo sapiens OX=9606 GN=CTNNA2 PE=1 SV=5	1	11	4	4	7	5	7	5	5	5	2	2	2	1	1	2	5	7	4	6	7	7	3	2	3	2	2	1	0	1	0	0	0	0	1	1	1	1	1	1	3	2	3	2
sp|P26368|U2AF2_HUMAN	sp|P26368|U2AF2_HUMAN	8	8	8	sp|P26368|U2AF2_HUMAN Splicing factor U2AF 65 kDa subunit OS=Homo sapiens OX=9606 GN=U2AF2 PE=1 SV=4	1	8	8	8	5	4	6	5	4	4	5	5	4	5	5	4	5	6	5	7	4	5	5	4	6	5	4	4	5	5	4	5	5	4	5	6	5	7	4	5	5	4	6	5
sp|P26373|RL13_HUMAN	sp|P26373|RL13_HUMAN	4	4	4	sp|P26373|RL13_HUMAN 60S ribosomal protein L13 OS=Homo sapiens OX=9606 GN=RPL13 PE=1 SV=4	1	4	4	4	1	1	2	1	2	2	2	2	2	3	3	2	2	2	3	2	2	2	1	1	2	1	2	2	2	2	2	3	3	2	2	2	3	2	2	2	1	1	2	1
sp|P26440|IVD_HUMAN	sp|P26440|IVD_HUMAN	3	3	3	sp|P26440|IVD_HUMAN Isovaleryl-CoA dehydrogenase, mitochondrial OS=Homo sapiens OX=9606 GN=IVD PE=1 SV=2	1	3	3	3	1	2	1	1	1	1	0	0	0	0	0	1	2	1	1	2	2	2	1	2	1	1	1	1	0	0	0	0	0	1	2	1	1	2	2	2	1	2	1	1
sp|P26447|S10A4_HUMAN	sp|P26447|S10A4_HUMAN	5	5	5	sp|P26447|S10A4_HUMAN Protein S100-A4 OS=Homo sapiens OX=9606 GN=S100A4 PE=1 SV=1	1	5	5	5	4	4	4	4	3	4	4	5	4	5	4	5	3	4	4	4	4	4	4	4	4	4	3	4	4	5	4	5	4	5	3	4	4	4	4	4	4	4	4	4
sp|P26572|MGAT1_HUMAN	sp|P26572|MGAT1_HUMAN	3	3	3	sp|P26572|MGAT1_HUMAN Alpha-1,3-mannosyl-glycoprotein 2-beta-N-acetylglucosaminyltransferase OS=Homo sapiens OX=9606 GN=MGAT1 PE=1 SV=2	1	3	3	3	1	0	2	2	1	2	0	0	0	0	0	0	0	0	0	0	0	0	1	0	2	2	1	2	0	0	0	0	0	0	0	0	0	0	0	0	1	0	2	2
sp|P26583|HMGB2_HUMAN	sp|P26583|HMGB2_HUMAN	7	6	6	sp|P26583|HMGB2_HUMAN High mobility group protein B2 OS=Homo sapiens OX=9606 GN=HMGB2 PE=1 SV=2	1	7	6	6	4	4	3	4	4	2	1	1	1	1	1	3	4	4	5	4	2	4	3	3	3	3	3	2	0	0	0	0	0	2	4	4	5	4	2	4	3	3	3	3
sp|P26599|PTBP1_HUMAN	sp|P26599|PTBP1_HUMAN	16	16	14	sp|P26599|PTBP1_HUMAN Polypyrimidine tract-binding protein 1 OS=Homo sapiens OX=9606 GN=PTBP1 PE=1 SV=1	1	16	16	14	13	13	13	14	14	12	8	8	11	9	11	9	14	14	15	13	15	15	13	13	13	14	14	12	8	8	11	9	11	9	14	14	15	13	15	15	12	12	12	12
sp|P26639|SYTC_HUMAN;sp|A2RTX5|SYTC2_HUMAN	sp|P26639|SYTC_HUMAN	16;2	16;2	16;2	sp|P26639|SYTC_HUMAN Threonine--tRNA ligase 1, cytoplasmic OS=Homo sapiens OX=9606 GN=TARS1 PE=1 SV=3	2	16	16	16	5	6	5	5	6	7	3	2	3	2	5	3	10	10	12	9	10	10	5	6	5	5	6	7	3	2	3	2	5	3	10	10	12	9	10	10	5	6	5	5
sp|P26640|SYVC_HUMAN	sp|P26640|SYVC_HUMAN	21	21	21	sp|P26640|SYVC_HUMAN Valine--tRNA ligase OS=Homo sapiens OX=9606 GN=VARS1 PE=1 SV=4	1	21	21	21	7	7	9	10	8	8	5	2	3	1	2	3	7	9	9	10	7	8	7	7	9	10	8	8	5	2	3	1	2	3	7	9	9	10	7	8	7	7	9	10
sp|P26641|EF1G_HUMAN	sp|P26641|EF1G_HUMAN	21	21	21	sp|P26641|EF1G_HUMAN Elongation factor 1-gamma OS=Homo sapiens OX=9606 GN=EEF1G PE=1 SV=3	1	21	21	21	12	11	11	11	12	11	8	9	8	8	9	8	16	18	17	14	15	15	12	11	11	11	12	11	8	9	8	8	9	8	16	18	17	14	15	15	12	11	11	11
sp|P26885|FKBP2_HUMAN	sp|P26885|FKBP2_HUMAN	4	4	4	sp|P26885|FKBP2_HUMAN Peptidyl-prolyl cis-trans isomerase FKBP2 OS=Homo sapiens OX=9606 GN=FKBP2 PE=1 SV=2	1	4	4	4	2	2	1	0	1	0	1	1	2	1	0	1	2	3	3	3	3	2	2	2	1	0	1	0	1	1	2	1	0	1	2	3	3	3	3	2	2	2	1	0
sp|P27105|STOM_HUMAN	sp|P27105|STOM_HUMAN	10	10	10	sp|P27105|STOM_HUMAN Stomatin OS=Homo sapiens OX=9606 GN=STOM PE=1 SV=3	1	10	10	10	6	7	7	9	8	7	8	6	7	8	6	8	6	7	8	6	7	6	6	7	7	9	8	7	8	6	7	8	6	8	6	7	8	6	7	6	6	7	7	9
sp|P27144|KAD4_HUMAN	sp|P27144|KAD4_HUMAN	3	3	3	sp|P27144|KAD4_HUMAN Adenylate kinase 4, mitochondrial OS=Homo sapiens OX=9606 GN=AK4 PE=1 SV=1	1	3	3	3	1	2	0	0	1	0	0	0	1	0	0	1	1	1	2	1	1	1	1	2	0	0	1	0	0	0	1	0	0	1	1	1	2	1	1	1	1	2	0	0
sp|P27169|PON1_HUMAN	sp|P27169|PON1_HUMAN	8	8	8	sp|P27169|PON1_HUMAN Serum paraoxonase/arylesterase 1 OS=Homo sapiens OX=9606 GN=PON1 PE=1 SV=3	1	8	8	8	4	5	3	4	3	6	5	7	6	5	6	5	5	5	5	5	5	4	4	5	3	4	3	6	5	7	6	5	6	5	5	5	5	5	5	4	4	5	3	4
sp|P27338|AOFB_HUMAN	sp|P27338|AOFB_HUMAN	18	18	17	sp|P27338|AOFB_HUMAN Amine oxidase [flavin-containing] B OS=Homo sapiens OX=9606 GN=MAOB PE=1 SV=3	1	18	18	17	14	15	15	17	14	14	5	4	7	5	8	7	1	0	0	0	0	0	14	15	15	17	14	14	5	4	7	5	8	7	1	0	0	0	0	0	14	15	14	17
sp|P27348|1433T_HUMAN	sp|P27348|1433T_HUMAN	16	11	11	sp|P27348|1433T_HUMAN 14-3-3 protein theta OS=Homo sapiens OX=9606 GN=YWHAQ PE=1 SV=1	1	16	11	11	15	13	15	16	14	14	13	12	12	13	12	12	14	15	15	13	15	12	10	9	11	11	10	10	8	8	8	8	8	8	10	10	11	9	10	9	10	9	11	11
sp|P27361|MK03_HUMAN;sp|P31152|MK04_HUMAN;sp|Q16659|MK06_HUMAN	sp|P27361|MK03_HUMAN	10;1;1	7;0;0	7;0;0	sp|P27361|MK03_HUMAN Mitogen-activated protein kinase 3 OS=Homo sapiens OX=9606 GN=MAPK3 PE=1 SV=4	3	10	7	7	3	3	6	3	5	3	3	3	4	5	4	7	5	7	7	5	10	8	2	2	5	2	4	2	1	1	2	3	2	5	3	5	4	3	7	5	2	2	5	2
sp|P27448|MARK3_HUMAN;sp|Q7KZI7|MARK2_HUMAN;sp|Q9P0L2|MARK1_HUMAN	sp|P27448|MARK3_HUMAN;sp|Q7KZI7|MARK2_HUMAN;sp|Q9P0L2|MARK1_HUMAN	1;1;1	1;1;1	1;1;1	sp|P27448|MARK3_HUMAN MAP/microtubule affinity-regulating kinase 3 OS=Homo sapiens OX=9606 GN=MARK3 PE=1 SV=5;sp|Q7KZI7|MARK2_HUMAN Serine/threonine-protein kinase MARK2 OS=Homo sapiens OX=9606 GN=MARK2 PE=1 SV=2;sp|Q9P0L2|MARK1_HUMAN Serine/threonine-prot	3	1	1	1	0	0	0	0	0	1	0	0	0	0	0	0	0	0	0	0	0	1	0	0	0	0	0	1	0	0	0	0	0	0	0	0	0	0	0	1	0	0	0	0
sp|P27482|CALL3_HUMAN	sp|P27482|CALL3_HUMAN	14	14	12	sp|P27482|CALL3_HUMAN Calmodulin-like protein 3 OS=Homo sapiens OX=9606 GN=CALML3 PE=1 SV=2	1	14	14	12	9	12	12	12	10	10	7	6	7	5	8	7	7	7	9	6	8	10	9	12	12	12	10	10	7	6	7	5	8	7	7	7	9	6	8	10	8	11	10	11
sp|P27635|RL10_HUMAN;sp|Q96L21|RL10L_HUMAN	sp|P27635|RL10_HUMAN	7;3	7;3	7;3	sp|P27635|RL10_HUMAN 60S ribosomal protein L10 OS=Homo sapiens OX=9606 GN=RPL10 PE=1 SV=4	2	7	7	7	2	2	2	2	2	1	2	5	4	5	6	5	2	2	3	2	2	2	2	2	2	2	2	1	2	5	4	5	6	5	2	2	3	2	2	2	2	2	2	2
sp|P27694|RFA1_HUMAN	sp|P27694|RFA1_HUMAN	14	14	14	sp|P27694|RFA1_HUMAN Replication protein A 70 kDa DNA-binding subunit OS=Homo sapiens OX=9606 GN=RPA1 PE=1 SV=2	1	14	14	14	5	3	3	2	4	3	3	2	1	1	1	2	9	7	6	10	9	10	5	3	3	2	4	3	3	2	1	1	1	2	9	7	6	10	9	10	5	3	3	2
sp|P27695|APEX1_HUMAN	sp|P27695|APEX1_HUMAN	13	13	13	sp|P27695|APEX1_HUMAN DNA-(apurinic or apyrimidinic site) endonuclease OS=Homo sapiens OX=9606 GN=APEX1 PE=1 SV=2	1	13	13	13	9	10	9	8	10	9	3	3	3	4	3	3	7	7	9	6	10	7	9	10	9	8	10	9	3	3	3	4	3	3	7	7	9	6	10	7	9	10	9	8
sp|P27701|CD82_HUMAN	sp|P27701|CD82_HUMAN	4	4	4	sp|P27701|CD82_HUMAN CD82 antigen OS=Homo sapiens OX=9606 GN=CD82 PE=1 SV=1	1	4	4	4	0	0	0	0	0	0	1	0	0	1	1	1	3	3	3	2	2	1	0	0	0	0	0	0	1	0	0	1	1	1	3	3	3	2	2	1	0	0	0	0
sp|P27708|PYR1_HUMAN	sp|P27708|PYR1_HUMAN	18	18	18	sp|P27708|PYR1_HUMAN CAD protein OS=Homo sapiens OX=9606 GN=CAD PE=1 SV=3	1	18	18	18	3	5	3	3	3	4	2	1	2	1	1	1	9	8	10	5	10	7	3	5	3	3	3	4	2	1	2	1	1	1	9	8	10	5	10	7	3	5	3	3
sp|P27797|CALR_HUMAN	sp|P27797|CALR_HUMAN	17	17	17	sp|P27797|CALR_HUMAN Calreticulin OS=Homo sapiens OX=9606 GN=CALR PE=1 SV=1	1	17	17	17	14	12	13	13	13	14	10	11	9	9	8	10	15	15	14	14	15	15	14	12	13	13	13	14	10	11	9	9	8	10	15	15	14	14	15	15	14	12	13	13
sp|P27816|MAP4_HUMAN	sp|P27816|MAP4_HUMAN	19	19	19	sp|P27816|MAP4_HUMAN Microtubule-associated protein 4 OS=Homo sapiens OX=9606 GN=MAP4 PE=1 SV=3	1	19	19	19	11	11	7	10	7	14	7	6	9	6	7	6	14	12	12	14	13	14	11	11	7	10	7	14	7	6	9	6	7	6	14	12	12	14	13	14	11	11	7	10
sp|P27824|CALX_HUMAN	sp|P27824|CALX_HUMAN	23	23	23	sp|P27824|CALX_HUMAN Calnexin OS=Homo sapiens OX=9606 GN=CANX PE=1 SV=2	1	23	23	23	16	19	20	19	18	17	5	4	6	4	6	6	12	11	11	9	12	8	16	19	20	19	18	17	5	4	6	4	6	6	12	11	11	9	12	8	16	19	20	19
sp|P28062|PSB8_HUMAN	sp|P28062|PSB8_HUMAN	8	8	8	sp|P28062|PSB8_HUMAN Proteasome subunit beta type-8 OS=Homo sapiens OX=9606 GN=PSMB8 PE=1 SV=3	1	8	8	8	3	3	5	4	4	3	4	3	3	4	4	5	7	6	7	6	6	7	3	3	5	4	4	3	4	3	3	4	4	5	7	6	7	6	6	7	3	3	5	4
sp|P28065|PSB9_HUMAN	sp|P28065|PSB9_HUMAN	5	5	5	sp|P28065|PSB9_HUMAN Proteasome subunit beta type-9 OS=Homo sapiens OX=9606 GN=PSMB9 PE=1 SV=2	1	5	5	5	1	2	2	1	1	1	1	2	3	2	1	2	2	2	3	3	2	2	1	2	2	1	1	1	1	2	3	2	1	2	2	2	3	3	2	2	1	2	2	1
sp|P28066|PSA5_HUMAN	sp|P28066|PSA5_HUMAN	11	11	11	sp|P28066|PSA5_HUMAN Proteasome subunit alpha type-5 OS=Homo sapiens OX=9606 GN=PSMA5 PE=1 SV=3	1	11	11	11	10	8	8	9	9	9	8	8	8	7	10	8	10	9	9	9	9	10	10	8	8	9	9	9	8	8	8	7	10	8	10	9	9	9	9	10	10	8	8	9
sp|P28068|DMB_HUMAN	sp|P28068|DMB_HUMAN	2	2	2	sp|P28068|DMB_HUMAN HLA class II histocompatibility antigen, DM beta chain OS=Homo sapiens OX=9606 GN=HLA-DMB PE=1 SV=1	1	2	2	2	1	1	1	2	1	1	0	0	0	0	0	0	0	1	0	0	0	0	1	1	1	2	1	1	0	0	0	0	0	0	0	1	0	0	0	0	1	1	1	2
sp|P28070|PSB4_HUMAN	sp|P28070|PSB4_HUMAN	7	7	7	sp|P28070|PSB4_HUMAN Proteasome subunit beta type-4 OS=Homo sapiens OX=9606 GN=PSMB4 PE=1 SV=4	1	7	7	7	6	6	6	6	6	6	6	4	5	5	4	4	5	5	5	5	4	5	6	6	6	6	6	6	6	4	5	5	4	4	5	5	5	5	4	5	6	6	6	6
sp|P28072|PSB6_HUMAN	sp|P28072|PSB6_HUMAN	5	5	5	sp|P28072|PSB6_HUMAN Proteasome subunit beta type-6 OS=Homo sapiens OX=9606 GN=PSMB6 PE=1 SV=4	1	5	5	5	3	3	3	3	3	3	1	1	1	2	3	2	4	3	4	4	4	3	3	3	3	3	3	3	1	1	1	2	3	2	4	3	4	4	4	3	3	3	3	3
sp|P28074|PSB5_HUMAN	sp|P28074|PSB5_HUMAN	11	11	11	sp|P28074|PSB5_HUMAN Proteasome subunit beta type-5 OS=Homo sapiens OX=9606 GN=PSMB5 PE=1 SV=3	1	11	11	11	6	8	7	6	6	7	1	2	3	2	3	2	5	5	6	4	5	6	6	8	7	6	6	7	1	2	3	2	3	2	5	5	6	4	5	6	6	8	7	6
sp|P28161|GSTM2_HUMAN;sp|P09488|GSTM1_HUMAN	sp|P28161|GSTM2_HUMAN	5;1	4;1	2;0	sp|P28161|GSTM2_HUMAN Glutathione S-transferase Mu 2 OS=Homo sapiens OX=9606 GN=GSTM2 PE=1 SV=2	2	5	4	2	2	1	1	1	3	1	5	5	5	5	5	5	1	2	1	1	1	2	2	1	1	1	3	1	4	4	4	4	4	4	1	2	1	1	1	2	2	1	1	1
sp|P28288|ABCD3_HUMAN	sp|P28288|ABCD3_HUMAN	7	7	7	sp|P28288|ABCD3_HUMAN ATP-binding cassette sub-family D member 3 OS=Homo sapiens OX=9606 GN=ABCD3 PE=1 SV=1	1	7	7	7	4	4	4	6	4	3	0	0	0	0	0	0	2	2	1	2	1	2	4	4	4	6	4	3	0	0	0	0	0	0	2	2	1	2	1	2	4	4	4	6
sp|P28289|TMOD1_HUMAN;sp|Q9NZQ9|TMOD4_HUMAN	sp|P28289|TMOD1_HUMAN	7;1	7;1	7;1	sp|P28289|TMOD1_HUMAN Tropomodulin-1 OS=Homo sapiens OX=9606 GN=TMOD1 PE=1 SV=1	2	7	7	7	2	2	0	1	0	2	4	6	4	3	4	3	0	0	1	0	1	0	2	2	0	1	0	2	4	6	4	3	4	3	0	0	1	0	1	0	2	2	0	1
sp|P28331|NDUS1_HUMAN	sp|P28331|NDUS1_HUMAN	22	22	22	sp|P28331|NDUS1_HUMAN NADH-ubiquinone oxidoreductase 75 kDa subunit, mitochondrial OS=Homo sapiens OX=9606 GN=NDUFS1 PE=1 SV=3	1	22	22	22	12	12	14	14	12	13	7	8	9	7	9	5	8	8	9	10	10	8	12	12	14	14	12	13	7	8	9	7	9	5	8	8	9	10	10	8	12	12	14	14
sp|P28340|DPOD1_HUMAN	sp|P28340|DPOD1_HUMAN	7	7	7	sp|P28340|DPOD1_HUMAN DNA polymerase delta catalytic subunit OS=Homo sapiens OX=9606 GN=POLD1 PE=1 SV=2	1	7	7	7	0	1	0	0	0	0	0	0	0	0	0	0	2	1	1	0	1	2	0	1	0	0	0	0	0	0	0	0	0	0	2	1	1	0	1	2	0	1	0	0
sp|P28482|MK01_HUMAN	sp|P28482|MK01_HUMAN	16	16	13	sp|P28482|MK01_HUMAN Mitogen-activated protein kinase 1 OS=Homo sapiens OX=9606 GN=MAPK1 PE=1 SV=3	1	16	16	13	7	6	8	7	6	8	7	8	6	8	8	8	9	10	11	9	9	9	7	6	8	7	6	8	7	8	6	8	8	8	9	10	11	9	9	9	6	5	7	6
sp|P28676|GRAN_HUMAN	sp|P28676|GRAN_HUMAN	4	4	4	sp|P28676|GRAN_HUMAN Grancalcin OS=Homo sapiens OX=9606 GN=GCA PE=1 SV=2	1	4	4	4	2	1	2	2	2	1	2	2	2	2	1	0	1	0	0	1	0	0	2	1	2	2	2	1	2	2	2	2	1	0	1	0	0	1	0	0	2	1	2	2
sp|P28799|GRN_HUMAN	sp|P28799|GRN_HUMAN	5	5	5	sp|P28799|GRN_HUMAN Progranulin OS=Homo sapiens OX=9606 GN=GRN PE=1 SV=2	1	5	5	5	1	2	1	2	2	2	1	1	0	0	0	0	1	2	3	1	1	3	1	2	1	2	2	2	1	1	0	0	0	0	1	2	3	1	1	3	1	2	1	2
sp|P28838|AMPL_HUMAN	sp|P28838|AMPL_HUMAN	25	25	25	sp|P28838|AMPL_HUMAN Cytosol aminopeptidase OS=Homo sapiens OX=9606 GN=LAP3 PE=1 SV=3	1	25	25	25	22	22	19	21	23	22	5	7	7	7	6	6	17	17	19	19	17	19	22	22	19	21	23	22	5	7	7	7	6	6	17	17	19	19	17	19	22	22	19	21
sp|P28906|CD34_HUMAN	sp|P28906|CD34_HUMAN	3	3	3	sp|P28906|CD34_HUMAN Hematopoietic progenitor cell antigen CD34 OS=Homo sapiens OX=9606 GN=CD34 PE=1 SV=2	1	3	3	3	0	0	0	0	0	0	2	1	3	3	1	0	1	0	1	1	1	1	0	0	0	0	0	0	2	1	3	3	1	0	1	0	1	1	1	1	0	0	0	0
sp|P29033|CXB2_HUMAN	sp|P29033|CXB2_HUMAN	2	2	2	sp|P29033|CXB2_HUMAN Gap junction beta-2 protein OS=Homo sapiens OX=9606 GN=GJB2 PE=1 SV=3	1	2	2	2	0	0	0	0	0	0	1	1	1	1	1	1	2	2	1	2	2	2	0	0	0	0	0	0	1	1	1	1	1	1	2	2	1	2	2	2	0	0	0	0
sp|P29034|S10A2_HUMAN	sp|P29034|S10A2_HUMAN	7	7	7	sp|P29034|S10A2_HUMAN Protein S100-A2 OS=Homo sapiens OX=9606 GN=S100A2 PE=1 SV=3	1	7	7	7	1	2	2	2	1	2	3	3	2	2	3	3	6	7	6	6	6	6	1	2	2	2	1	2	3	3	2	2	3	3	6	7	6	6	6	6	1	2	2	2
sp|P29083|T2EA_HUMAN	sp|P29083|T2EA_HUMAN	2	2	2	sp|P29083|T2EA_HUMAN General transcription factor IIE subunit 1 OS=Homo sapiens OX=9606 GN=GTF2E1 PE=1 SV=2	1	2	2	2	0	2	0	2	0	1	0	0	0	0	0	0	1	0	1	1	1	2	0	2	0	2	0	1	0	0	0	0	0	0	1	0	1	1	1	2	0	2	0	2
sp|P29144|TPP2_HUMAN	sp|P29144|TPP2_HUMAN	10	10	10	sp|P29144|TPP2_HUMAN Tripeptidyl-peptidase 2 OS=Homo sapiens OX=9606 GN=TPP2 PE=1 SV=4	1	10	10	10	6	5	6	6	8	5	0	0	0	0	0	0	6	7	7	7	7	6	6	5	6	6	8	5	0	0	0	0	0	0	6	7	7	7	7	6	6	5	6	6
sp|P29218|IMPA1_HUMAN	sp|P29218|IMPA1_HUMAN	6	6	6	sp|P29218|IMPA1_HUMAN Inositol monophosphatase 1 OS=Homo sapiens OX=9606 GN=IMPA1 PE=1 SV=1	1	6	6	6	2	2	2	2	2	1	1	2	1	3	2	3	4	3	3	4	4	4	2	2	2	2	2	1	1	2	1	3	2	3	4	3	3	4	4	4	2	2	2	2
sp|P29350|PTN6_HUMAN	sp|P29350|PTN6_HUMAN	7	7	7	sp|P29350|PTN6_HUMAN Tyrosine-protein phosphatase non-receptor type 6 OS=Homo sapiens OX=9606 GN=PTPN6 PE=1 SV=1	1	7	7	7	3	3	2	2	2	3	0	0	0	0	0	0	4	2	4	3	3	4	3	3	2	2	2	3	0	0	0	0	0	0	4	2	4	3	3	4	3	3	2	2
sp|P29353|SHC1_HUMAN	sp|P29353|SHC1_HUMAN	3	3	3	sp|P29353|SHC1_HUMAN SHC-transforming protein 1 OS=Homo sapiens OX=9606 GN=SHC1 PE=1 SV=4	1	3	3	3	0	0	0	0	0	0	0	0	0	0	0	0	0	0	1	1	2	3	0	0	0	0	0	0	0	0	0	0	0	0	0	0	1	1	2	3	0	0	0	0
sp|P29373|RABP2_HUMAN	sp|P29373|RABP2_HUMAN	11	11	10	sp|P29373|RABP2_HUMAN Cellular retinoic acid-binding protein 2 OS=Homo sapiens OX=9606 GN=CRABP2 PE=1 SV=2	1	11	11	10	8	8	8	8	8	8	9	10	10	9	11	9	7	8	8	8	10	10	8	8	8	8	8	8	9	10	10	9	11	9	7	8	8	8	10	10	8	8	8	8
sp|P29401|TKT_HUMAN	sp|P29401|TKT_HUMAN	30	30	30	sp|P29401|TKT_HUMAN Transketolase OS=Homo sapiens OX=9606 GN=TKT PE=1 SV=3	1	30	30	30	26	26	27	25	26	24	18	18	18	16	18	16	25	25	26	23	24	25	26	26	27	25	26	24	18	18	18	16	18	16	25	25	26	23	24	25	26	26	27	25
sp|P29466|CASP1_HUMAN	sp|P29466|CASP1_HUMAN	6	6	6	sp|P29466|CASP1_HUMAN Caspase-1 OS=Homo sapiens OX=9606 GN=CASP1 PE=1 SV=1	1	6	6	6	0	0	0	0	0	0	0	0	1	0	0	0	2	5	5	1	2	2	0	0	0	0	0	0	0	0	1	0	0	0	2	5	5	1	2	2	0	0	0	0
sp|P29508|SPB3_HUMAN	sp|P29508|SPB3_HUMAN	29	29	14	sp|P29508|SPB3_HUMAN Serpin B3 OS=Homo sapiens OX=9606 GN=SERPINB3 PE=1 SV=2	1	29	29	14	9	11	11	11	9	11	24	23	24	25	24	21	24	27	26	26	25	28	9	11	11	11	9	11	24	23	24	25	24	21	24	27	26	26	25	28	7	8	9	8
sp|P29536|LMOD1_HUMAN	sp|P29536|LMOD1_HUMAN	3	3	3	sp|P29536|LMOD1_HUMAN Leiomodin-1 OS=Homo sapiens OX=9606 GN=LMOD1 PE=1 SV=3	1	3	3	3	0	0	1	0	0	0	3	3	3	3	3	3	0	0	0	0	0	0	0	0	1	0	0	0	3	3	3	3	3	3	0	0	0	0	0	0	0	0	1	0
sp|P29590|PML_HUMAN	sp|P29590|PML_HUMAN	20	20	20	sp|P29590|PML_HUMAN Protein PML OS=Homo sapiens OX=9606 GN=PML PE=1 SV=3	1	20	20	20	8	9	7	7	9	6	2	2	3	2	2	2	12	12	12	15	14	12	8	9	7	7	9	6	2	2	3	2	2	2	12	12	12	15	14	12	8	9	7	7
sp|P29622|KAIN_HUMAN	sp|P29622|KAIN_HUMAN	7	7	7	sp|P29622|KAIN_HUMAN Kallistatin OS=Homo sapiens OX=9606 GN=SERPINA4 PE=1 SV=3	1	7	7	7	0	0	0	0	0	0	4	4	7	6	5	5	1	0	0	0	0	0	0	0	0	0	0	0	4	4	7	6	5	5	1	0	0	0	0	0	0	0	0	0
sp|P29692|EF1D_HUMAN	sp|P29692|EF1D_HUMAN	11	11	10	sp|P29692|EF1D_HUMAN Elongation factor 1-delta OS=Homo sapiens OX=9606 GN=EEF1D PE=1 SV=5	1	11	11	10	7	9	8	8	7	8	5	7	7	6	6	7	8	9	8	9	7	7	7	9	8	8	7	8	5	7	7	6	6	7	8	9	8	9	7	7	7	9	8	8
sp|P29728|OAS2_HUMAN	sp|P29728|OAS2_HUMAN	16	16	16	sp|P29728|OAS2_HUMAN 2-5-oligoadenylate synthase 2 OS=Homo sapiens OX=9606 GN=OAS2 PE=1 SV=3	1	16	16	16	3	3	4	3	3	2	0	0	0	0	0	0	13	14	14	13	11	14	3	3	4	3	3	2	0	0	0	0	0	0	13	14	14	13	11	14	3	3	4	3
sp|P29966|MARCS_HUMAN	sp|P29966|MARCS_HUMAN	7	7	7	sp|P29966|MARCS_HUMAN Myristoylated alanine-rich C-kinase substrate OS=Homo sapiens OX=9606 GN=MARCKS PE=1 SV=4	1	7	7	7	3	4	4	3	4	3	2	3	4	2	2	3	6	6	6	6	5	6	3	4	4	3	4	3	2	3	4	2	2	3	6	6	6	6	5	6	3	4	4	3
sp|P29992|GNA11_HUMAN;sp|O95837|GNA14_HUMAN	sp|P29992|GNA11_HUMAN	5;1	3;0	3;0	sp|P29992|GNA11_HUMAN Guanine nucleotide-binding protein subunit alpha-11 OS=Homo sapiens OX=9606 GN=GNA11 PE=1 SV=2	2	5	3	3	1	1	1	0	2	1	2	2	1	2	3	0	0	1	1	2	1	0	0	0	1	0	1	0	2	1	1	1	2	0	0	0	0	1	0	0	0	0	1	0
sp|P30038|AL4A1_HUMAN	sp|P30038|AL4A1_HUMAN	10	10	10	sp|P30038|AL4A1_HUMAN Delta-1-pyrroline-5-carboxylate dehydrogenase, mitochondrial OS=Homo sapiens OX=9606 GN=ALDH4A1 PE=1 SV=3	1	10	10	10	3	3	3	3	3	3	6	6	7	6	5	6	2	3	2	2	3	3	3	3	3	3	3	3	6	6	7	6	5	6	2	3	2	2	3	3	3	3	3	3
sp|P30040|ERP29_HUMAN	sp|P30040|ERP29_HUMAN	7	7	7	sp|P30040|ERP29_HUMAN Endoplasmic reticulum resident protein 29 OS=Homo sapiens OX=9606 GN=ERP29 PE=1 SV=4	1	7	7	7	6	6	6	4	5	5	4	6	4	4	5	4	4	6	6	6	6	6	6	6	6	4	5	5	4	6	4	4	5	4	4	6	6	6	6	6	6	6	6	4
sp|P30041|PRDX6_HUMAN	sp|P30041|PRDX6_HUMAN	19	19	19	sp|P30041|PRDX6_HUMAN Peroxiredoxin-6 OS=Homo sapiens OX=9606 GN=PRDX6 PE=1 SV=3	1	19	19	19	14	14	13	13	13	13	14	14	13	13	14	13	12	14	13	11	13	12	14	14	13	13	13	13	14	14	13	13	14	13	12	14	13	11	13	12	14	14	13	13
sp|P30043|BLVRB_HUMAN	sp|P30043|BLVRB_HUMAN	10	10	10	sp|P30043|BLVRB_HUMAN Flavin reductase (NADPH) OS=Homo sapiens OX=9606 GN=BLVRB PE=1 SV=3	1	10	10	10	8	8	8	7	7	8	8	8	7	8	8	8	8	8	10	9	8	7	8	8	8	7	7	8	8	8	7	8	8	8	8	8	10	9	8	7	8	8	8	7
sp|P30044|PRDX5_HUMAN	sp|P30044|PRDX5_HUMAN	11	11	11	sp|P30044|PRDX5_HUMAN Peroxiredoxin-5, mitochondrial OS=Homo sapiens OX=9606 GN=PRDX5 PE=1 SV=4	1	11	11	11	9	8	8	8	8	8	10	10	8	9	10	10	7	8	10	9	8	9	9	8	8	8	8	8	10	10	8	9	10	10	7	8	10	9	8	9	9	8	8	8
sp|P30046|DOPD_HUMAN;sp|A6NHG4|DDTL_HUMAN	sp|P30046|DOPD_HUMAN;sp|A6NHG4|DDTL_HUMAN	5;4	5;4	5;4	sp|P30046|DOPD_HUMAN D-dopachrome decarboxylase OS=Homo sapiens OX=9606 GN=DDT PE=1 SV=3;sp|A6NHG4|DDTL_HUMAN D-dopachrome decarboxylase-like protein OS=Homo sapiens OX=9606 GN=DDTL PE=2 SV=1	2	5	5	5	3	3	3	3	4	3	4	4	4	2	3	2	4	4	4	3	4	4	3	3	3	3	4	3	4	4	4	2	3	2	4	4	4	3	4	4	3	3	3	3
sp|P30047|GFRP_HUMAN	sp|P30047|GFRP_HUMAN	3	3	3	sp|P30047|GFRP_HUMAN GTP cyclohydrolase 1 feedback regulatory protein OS=Homo sapiens OX=9606 GN=GCHFR PE=1 SV=3	1	3	3	3	0	0	0	0	1	0	1	0	0	0	0	0	1	0	0	1	1	0	0	0	0	0	1	0	1	0	0	0	0	0	1	0	0	1	1	0	0	0	0	0
sp|P30048|PRDX3_HUMAN	sp|P30048|PRDX3_HUMAN	8	8	8	sp|P30048|PRDX3_HUMAN Thioredoxin-dependent peroxide reductase, mitochondrial OS=Homo sapiens OX=9606 GN=PRDX3 PE=1 SV=3	1	8	8	8	7	7	7	6	5	7	7	7	7	7	6	6	7	7	7	7	7	7	7	7	7	6	5	7	7	7	7	7	6	6	7	7	7	7	7	7	7	7	7	6
sp|P30049|ATPD_HUMAN	sp|P30049|ATPD_HUMAN	3	3	3	sp|P30049|ATPD_HUMAN ATP synthase subunit delta, mitochondrial OS=Homo sapiens OX=9606 GN=ATP5F1D PE=1 SV=2	1	3	3	3	2	3	2	2	3	3	1	2	2	2	2	2	3	1	2	2	2	3	2	3	2	2	3	3	1	2	2	2	2	2	3	1	2	2	2	3	2	3	2	2
sp|P30050|RL12_HUMAN	sp|P30050|RL12_HUMAN	8	8	8	sp|P30050|RL12_HUMAN 60S ribosomal protein L12 OS=Homo sapiens OX=9606 GN=RPL12 PE=1 SV=1	1	8	8	8	7	6	8	7	7	6	6	6	5	6	6	6	6	6	7	6	6	6	7	6	8	7	7	6	6	6	5	6	6	6	6	6	7	6	6	6	7	6	8	7
sp|P30084|ECHM_HUMAN	sp|P30084|ECHM_HUMAN	11	11	11	sp|P30084|ECHM_HUMAN Enoyl-CoA hydratase, mitochondrial OS=Homo sapiens OX=9606 GN=ECHS1 PE=1 SV=4	1	11	11	11	7	7	9	7	8	6	6	7	6	8	6	7	6	6	6	6	6	7	7	7	9	7	8	6	6	7	6	8	6	7	6	6	6	6	6	7	7	7	9	7
sp|P30085|KCY_HUMAN	sp|P30085|KCY_HUMAN	9	9	9	sp|P30085|KCY_HUMAN UMP-CMP kinase OS=Homo sapiens OX=9606 GN=CMPK1 PE=1 SV=3	1	9	9	9	3	2	3	4	3	4	6	6	6	6	6	5	5	5	7	5	6	6	3	2	3	4	3	4	6	6	6	6	6	5	5	5	7	5	6	6	3	2	3	4
sp|P30086|PEBP1_HUMAN	sp|P30086|PEBP1_HUMAN	13	13	13	sp|P30086|PEBP1_HUMAN Phosphatidylethanolamine-binding protein 1 OS=Homo sapiens OX=9606 GN=PEBP1 PE=1 SV=3	1	13	13	13	9	10	10	9	9	10	9	10	10	10	9	9	11	9	11	9	9	9	9	10	10	9	9	10	9	10	10	10	9	9	11	9	11	9	9	9	9	10	10	9
sp|P30101|PDIA3_HUMAN	sp|P30101|PDIA3_HUMAN	38	38	37	sp|P30101|PDIA3_HUMAN Protein disulfide-isomerase A3 OS=Homo sapiens OX=9606 GN=PDIA3 PE=1 SV=4	1	38	38	37	33	31	32	32	29	32	23	23	22	21	23	21	31	30	27	29	27	30	33	31	32	32	29	32	23	23	22	21	23	21	31	30	27	29	27	30	32	30	31	31
sp|P30153|2AAA_HUMAN;sp|P30154|2AAB_HUMAN	sp|P30153|2AAA_HUMAN	23;4	23;4	23;4	sp|P30153|2AAA_HUMAN Serine/threonine-protein phosphatase 2A 65 kDa regulatory subunit A alpha isoform OS=Homo sapiens OX=9606 GN=PPP2R1A PE=1 SV=4	2	23	23	23	10	9	9	10	9	9	12	11	9	12	14	12	17	18	17	16	18	17	10	9	9	10	9	9	12	11	9	12	14	12	17	18	17	16	18	17	10	9	9	10
sp|P30405|PPIF_HUMAN	sp|P30405|PPIF_HUMAN	4	4	4	sp|P30405|PPIF_HUMAN Peptidyl-prolyl cis-trans isomerase F, mitochondrial OS=Homo sapiens OX=9606 GN=PPIF PE=1 SV=1	1	4	4	4	2	3	3	2	2	2	0	1	1	0	0	0	3	3	4	4	3	2	2	3	3	2	2	2	0	1	1	0	0	0	3	3	4	4	3	2	2	3	3	2
sp|P30419|NMT1_HUMAN;sp|O60551|NMT2_HUMAN	sp|P30419|NMT1_HUMAN	4;1	4;1	4;1	sp|P30419|NMT1_HUMAN Glycylpeptide N-tetradecanoyltransferase 1 OS=Homo sapiens OX=9606 GN=NMT1 PE=1 SV=2	2	4	4	4	3	3	2	2	3	2	2	1	1	1	1	2	4	4	3	3	4	4	3	3	2	2	3	2	2	1	1	1	1	2	4	4	3	3	4	4	3	3	2	2
sp|P30519|HMOX2_HUMAN	sp|P30519|HMOX2_HUMAN	8	8	8	sp|P30519|HMOX2_HUMAN Heme oxygenase 2 OS=Homo sapiens OX=9606 GN=HMOX2 PE=1 SV=2	1	8	8	8	6	6	5	5	6	5	0	0	0	0	0	0	5	5	5	5	5	4	6	6	5	5	6	5	0	0	0	0	0	0	5	5	5	5	5	4	6	6	5	5
sp|P30520|PURA2_HUMAN	sp|P30520|PURA2_HUMAN	9	9	9	sp|P30520|PURA2_HUMAN Adenylosuccinate synthetase isozyme 2 OS=Homo sapiens OX=9606 GN=ADSS2 PE=1 SV=3	1	9	9	9	6	6	6	6	5	5	1	2	2	2	0	1	4	7	6	7	7	6	6	6	6	6	5	5	1	2	2	2	0	1	4	7	6	7	7	6	6	6	6	6
sp|P30533|AMRP_HUMAN	sp|P30533|AMRP_HUMAN	2	2	2	sp|P30533|AMRP_HUMAN Alpha-2-macroglobulin receptor-associated protein OS=Homo sapiens OX=9606 GN=LRPAP1 PE=1 SV=1	1	2	2	2	2	1	2	1	2	2	1	1	1	1	1	1	0	1	1	1	1	0	2	1	2	1	2	2	1	1	1	1	1	1	0	1	1	1	1	0	2	1	2	1
sp|P30566|PUR8_HUMAN	sp|P30566|PUR8_HUMAN	9	9	9	sp|P30566|PUR8_HUMAN Adenylosuccinate lyase OS=Homo sapiens OX=9606 GN=ADSL PE=1 SV=2	1	9	9	9	3	3	4	3	4	4	1	1	1	1	2	2	2	4	4	5	2	3	3	3	4	3	4	4	1	1	1	1	2	2	2	4	4	5	2	3	3	3	4	3
sp|P30622|CLIP1_HUMAN	sp|P30622|CLIP1_HUMAN	16	16	15	sp|P30622|CLIP1_HUMAN CAP-Gly domain-containing linker protein 1 OS=Homo sapiens OX=9606 GN=CLIP1 PE=1 SV=2	1	16	16	15	2	1	1	2	0	1	0	2	3	1	2	3	8	13	8	8	6	9	2	1	1	2	0	1	0	2	3	1	2	3	8	13	8	8	6	9	2	1	1	2
sp|P30626|SORCN_HUMAN	sp|P30626|SORCN_HUMAN	9	9	9	sp|P30626|SORCN_HUMAN Sorcin OS=Homo sapiens OX=9606 GN=SRI PE=1 SV=1	1	9	9	9	2	2	2	2	0	2	5	6	7	6	6	6	4	5	4	4	5	3	2	2	2	2	0	2	5	6	7	6	6	6	4	5	4	4	5	3	2	2	2	2
sp|P30679|GNA15_HUMAN	sp|P30679|GNA15_HUMAN	1	1	1	sp|P30679|GNA15_HUMAN Guanine nucleotide-binding protein subunit alpha-15 OS=Homo sapiens OX=9606 GN=GNA15 PE=1 SV=2	1	1	1	1	0	0	0	0	0	0	0	0	0	0	0	0	0	0	0	0	0	1	0	0	0	0	0	0	0	0	0	0	0	0	0	0	0	0	0	1	0	0	0	0
sp|P30740|ILEU_HUMAN;sp|O75830|SPI2_HUMAN	sp|P30740|ILEU_HUMAN	19;1	19;1	18;0	sp|P30740|ILEU_HUMAN Leukocyte elastase inhibitor OS=Homo sapiens OX=9606 GN=SERPINB1 PE=1 SV=1	2	19	19	18	6	5	3	5	4	4	13	10	10	10	9	9	14	15	16	14	17	18	6	5	3	5	4	4	13	10	10	10	9	9	14	15	16	14	17	18	5	4	3	4
sp|P30825|SL7A1_HUMAN;sp|P52569|CTR2_HUMAN	sp|P30825|SL7A1_HUMAN;sp|P52569|CTR2_HUMAN	1;1	1;1	1;1	sp|P30825|SL7A1_HUMAN High affinity cationic amino acid transporter 1 OS=Homo sapiens OX=9606 GN=SLC7A1 PE=1 SV=1;sp|P52569|CTR2_HUMAN Cationic amino acid transporter 2 OS=Homo sapiens OX=9606 GN=SLC7A2 PE=1 SV=2	2	1	1	1	0	0	0	0	0	0	0	0	0	0	0	0	1	0	0	0	0	1	0	0	0	0	0	0	0	0	0	0	0	0	1	0	0	0	0	1	0	0	0	0
sp|P30837|AL1B1_HUMAN	sp|P30837|AL1B1_HUMAN	9	7	7	sp|P30837|AL1B1_HUMAN Aldehyde dehydrogenase X, mitochondrial OS=Homo sapiens OX=9606 GN=ALDH1B1 PE=1 SV=3	1	9	7	7	4	3	3	3	3	4	2	3	2	2	2	2	1	3	3	2	4	1	3	2	2	2	2	3	1	1	1	1	1	0	1	3	3	2	3	1	3	2	2	2
sp|P30838|AL3A1_HUMAN	sp|P30838|AL3A1_HUMAN	13	13	12	sp|P30838|AL3A1_HUMAN Aldehyde dehydrogenase, dimeric NADP-preferring OS=Homo sapiens OX=9606 GN=ALDH3A1 PE=1 SV=3	1	13	13	12	1	1	1	1	1	1	2	3	3	4	3	2	10	11	11	11	9	11	1	1	1	1	1	1	2	3	3	4	3	2	10	11	11	11	9	11	0	0	0	0
sp|P30876|RPB2_HUMAN	sp|P30876|RPB2_HUMAN	3	3	3	sp|P30876|RPB2_HUMAN DNA-directed RNA polymerase II subunit RPB2 OS=Homo sapiens OX=9606 GN=POLR2B PE=1 SV=1	1	3	3	3	1	1	0	1	1	0	0	0	0	0	0	0	0	1	0	0	1	1	1	1	0	1	1	0	0	0	0	0	0	0	0	1	0	0	1	1	1	1	0	1
sp|P31040|SDHA_HUMAN	sp|P31040|SDHA_HUMAN	18	18	18	sp|P31040|SDHA_HUMAN Succinate dehydrogenase [ubiquinone] flavoprotein subunit, mitochondrial OS=Homo sapiens OX=9606 GN=SDHA PE=1 SV=2	1	18	18	18	8	9	8	7	8	10	6	6	5	6	4	6	8	8	10	8	10	10	8	9	8	7	8	10	6	6	5	6	4	6	8	8	10	8	10	10	8	9	8	7
sp|P31146|COR1A_HUMAN	sp|P31146|COR1A_HUMAN	12	12	12	sp|P31146|COR1A_HUMAN Coronin-1A OS=Homo sapiens OX=9606 GN=CORO1A PE=1 SV=4	1	12	12	12	7	6	6	7	7	6	4	4	5	4	5	5	6	9	10	8	6	6	7	6	6	7	7	6	4	4	5	4	5	5	6	9	10	8	6	6	7	6	6	7
sp|P31150|GDIA_HUMAN	sp|P31150|GDIA_HUMAN	22	13	13	sp|P31150|GDIA_HUMAN Rab GDP dissociation inhibitor alpha OS=Homo sapiens OX=9606 GN=GDI1 PE=1 SV=2	1	22	13	13	13	12	16	14	14	14	14	16	16	16	17	17	16	19	19	15	18	17	7	7	10	8	8	8	9	10	9	9	9	10	10	11	12	10	11	10	7	7	10	8
sp|P31151|S10A7_HUMAN;sp|Q86SG5|S1A7A_HUMAN	sp|P31151|S10A7_HUMAN;sp|Q86SG5|S1A7A_HUMAN	5;4	5;4	5;4	sp|P31151|S10A7_HUMAN Protein S100-A7 OS=Homo sapiens OX=9606 GN=S100A7 PE=1 SV=4;sp|Q86SG5|S1A7A_HUMAN Protein S100-A7A OS=Homo sapiens OX=9606 GN=S100A7A PE=1 SV=3	2	5	5	5	1	1	2	1	1	1	1	1	1	1	2	2	4	2	2	3	2	2	1	1	2	1	1	1	1	1	1	1	2	2	4	2	2	3	2	2	1	1	2	1
sp|P31153|METK2_HUMAN;sp|Q00266|METK1_HUMAN	sp|P31153|METK2_HUMAN	8;1	8;1	8;1	sp|P31153|METK2_HUMAN S-adenosylmethionine synthase isoform type-2 OS=Homo sapiens OX=9606 GN=MAT2A PE=1 SV=1	2	8	8	8	5	5	5	5	5	3	2	5	4	3	5	5	6	6	4	5	4	7	5	5	5	5	5	3	2	5	4	3	5	5	6	6	4	5	4	7	5	5	5	5
sp|P31323|KAP3_HUMAN	sp|P31323|KAP3_HUMAN	4	2	2	sp|P31323|KAP3_HUMAN cAMP-dependent protein kinase type II-beta regulatory subunit OS=Homo sapiens OX=9606 GN=PRKAR2B PE=1 SV=3	1	4	2	2	1	2	2	2	2	1	2	3	3	3	3	3	1	2	1	1	2	1	0	1	1	1	1	0	2	2	1	1	2	2	0	1	0	0	1	0	0	1	1	1
sp|P31350|RIR2_HUMAN	sp|P31350|RIR2_HUMAN	4	4	3	sp|P31350|RIR2_HUMAN Ribonucleoside-diphosphate reductase subunit M2 OS=Homo sapiens OX=9606 GN=RRM2 PE=1 SV=1	1	4	4	3	0	0	0	0	0	0	0	0	0	0	0	0	2	1	3	1	2	3	0	0	0	0	0	0	0	0	0	0	0	0	2	1	3	1	2	3	0	0	0	0
sp|P31483|TIA1_HUMAN	sp|P31483|TIA1_HUMAN	2	1	1	sp|P31483|TIA1_HUMAN Nucleolysin TIA-1 isoform p40 OS=Homo sapiens OX=9606 GN=TIA1 PE=1 SV=3	1	2	1	1	1	1	0	0	1	0	1	1	1	0	0	0	2	1	0	1	0	0	0	0	0	0	1	0	0	0	0	0	0	0	1	1	0	0	0	0	0	0	0	0
sp|P31689|DNJA1_HUMAN	sp|P31689|DNJA1_HUMAN	9	9	9	sp|P31689|DNJA1_HUMAN DnaJ homolog subfamily A member 1 OS=Homo sapiens OX=9606 GN=DNAJA1 PE=1 SV=2	1	9	9	9	3	4	6	5	5	6	2	1	1	2	2	1	6	7	5	5	5	7	3	4	6	5	5	6	2	1	1	2	2	1	6	7	5	5	5	7	3	4	6	5
sp|P31749|AKT1_HUMAN	sp|P31749|AKT1_HUMAN	1	1	1	sp|P31749|AKT1_HUMAN RAC-alpha serine/threonine-protein kinase OS=Homo sapiens OX=9606 GN=AKT1 PE=1 SV=2	1	1	1	1	1	1	1	1	1	1	0	0	0	1	0	1	1	1	0	1	1	1	1	1	1	1	1	1	0	0	0	1	0	1	1	1	0	1	1	1	1	1	1	1
sp|P31930|QCR1_HUMAN	sp|P31930|QCR1_HUMAN	17	17	17	sp|P31930|QCR1_HUMAN Cytochrome b-c1 complex subunit 1, mitochondrial OS=Homo sapiens OX=9606 GN=UQCRC1 PE=1 SV=3	1	17	17	17	11	10	13	12	12	12	5	7	8	6	7	7	11	11	10	11	11	10	11	10	13	12	12	12	5	7	8	6	7	7	11	11	10	11	11	10	11	10	13	12
sp|P31937|3HIDH_HUMAN	sp|P31937|3HIDH_HUMAN	7	7	7	sp|P31937|3HIDH_HUMAN 3-hydroxyisobutyrate dehydrogenase, mitochondrial OS=Homo sapiens OX=9606 GN=HIBADH PE=1 SV=2	1	7	7	7	0	0	0	0	1	0	5	3	4	4	3	1	0	1	3	1	0	2	0	0	0	0	1	0	5	3	4	4	3	1	0	1	3	1	0	2	0	0	0	0
sp|P31939|PUR9_HUMAN	sp|P31939|PUR9_HUMAN	21	21	21	sp|P31939|PUR9_HUMAN Bifunctional purine biosynthesis protein ATIC OS=Homo sapiens OX=9606 GN=ATIC PE=1 SV=3	1	21	21	21	10	14	14	16	13	9	8	7	9	6	8	9	14	13	17	15	14	15	10	14	14	16	13	9	8	7	9	6	8	9	14	13	17	15	14	15	10	14	14	16
sp|P31941|ABC3A_HUMAN;sp|Q9UH17|ABC3B_HUMAN	sp|P31941|ABC3A_HUMAN;sp|Q9UH17|ABC3B_HUMAN	1;1	1;1	1;1	sp|P31941|ABC3A_HUMAN DNA dC->dU-editing enzyme APOBEC-3A OS=Homo sapiens OX=9606 GN=APOBEC3A PE=1 SV=3;sp|Q9UH17|ABC3B_HUMAN DNA dC->dU-editing enzyme APOBEC-3B OS=Homo sapiens OX=9606 GN=APOBEC3B PE=1 SV=1	2	1	1	1	0	0	0	0	0	0	0	0	0	0	0	0	1	1	1	1	1	1	0	0	0	0	0	0	0	0	0	0	0	0	1	1	1	1	1	1	0	0	0	0
sp|P31942|HNRH3_HUMAN	sp|P31942|HNRH3_HUMAN	8	7	7	sp|P31942|HNRH3_HUMAN Heterogeneous nuclear ribonucleoprotein H3 OS=Homo sapiens OX=9606 GN=HNRNPH3 PE=1 SV=2	1	8	7	7	5	5	5	4	6	5	6	5	6	6	6	6	5	5	4	4	6	5	5	5	5	4	6	5	6	5	6	6	6	6	5	4	4	4	6	5	5	5	5	4
sp|P31943|HNRH1_HUMAN	sp|P31943|HNRH1_HUMAN	14	14	8	sp|P31943|HNRH1_HUMAN Heterogeneous nuclear ribonucleoprotein H OS=Homo sapiens OX=9606 GN=HNRNPH1 PE=1 SV=4	1	14	14	8	10	11	11	10	10	10	8	8	8	9	9	8	11	12	9	10	10	12	10	11	11	10	10	10	8	8	8	9	9	8	11	12	9	10	10	12	5	6	6	5
sp|P31946|1433B_HUMAN	sp|P31946|1433B_HUMAN	12	6	6	sp|P31946|1433B_HUMAN 14-3-3 protein beta/alpha OS=Homo sapiens OX=9606 GN=YWHAB PE=1 SV=3	1	12	6	6	11	10	10	11	9	10	11	10	10	11	10	10	10	12	10	10	11	9	6	5	5	5	4	5	5	5	5	5	5	5	5	6	5	5	5	5	6	5	5	5
sp|P31947|1433S_HUMAN	sp|P31947|1433S_HUMAN	21	18	18	sp|P31947|1433S_HUMAN 14-3-3 protein sigma OS=Homo sapiens OX=9606 GN=SFN PE=1 SV=1	1	21	18	18	18	16	16	17	16	16	14	14	15	15	15	14	19	20	18	19	21	18	15	14	14	14	14	14	11	12	13	12	13	12	17	17	16	17	18	16	15	14	14	14
sp|P31948|STIP1_HUMAN	sp|P31948|STIP1_HUMAN	21	21	21	sp|P31948|STIP1_HUMAN Stress-induced-phosphoprotein 1 OS=Homo sapiens OX=9606 GN=STIP1 PE=1 SV=1	1	21	21	21	14	14	12	13	14	12	13	14	10	10	13	12	13	13	14	13	14	13	14	14	12	13	14	12	13	14	10	10	13	12	13	13	14	13	14	13	14	14	12	13
sp|P31949|S10AB_HUMAN	sp|P31949|S10AB_HUMAN	6	6	6	sp|P31949|S10AB_HUMAN Protein S100-A11 OS=Homo sapiens OX=9606 GN=S100A11 PE=1 SV=2	1	6	6	6	4	5	6	5	5	5	5	5	5	5	5	5	5	5	5	6	5	5	4	5	6	5	5	5	5	5	5	5	5	5	5	5	5	6	5	5	4	5	6	5
sp|P32119|PRDX2_HUMAN	sp|P32119|PRDX2_HUMAN	15	15	14	sp|P32119|PRDX2_HUMAN Peroxiredoxin-2 OS=Homo sapiens OX=9606 GN=PRDX2 PE=1 SV=5	1	15	15	14	10	12	11	11	10	11	12	11	11	11	10	9	11	11	11	12	11	12	10	12	11	11	10	11	12	11	11	11	10	9	11	11	11	12	11	12	9	11	10	10
sp|P32320|CDD_HUMAN	sp|P32320|CDD_HUMAN	3	3	3	sp|P32320|CDD_HUMAN Cytidine deaminase OS=Homo sapiens OX=9606 GN=CDA PE=1 SV=2	1	3	3	3	0	0	0	0	0	0	2	1	2	2	1	1	0	0	0	1	0	0	0	0	0	0	0	0	2	1	2	2	1	1	0	0	0	1	0	0	0	0	0	0
sp|P32321|DCTD_HUMAN	sp|P32321|DCTD_HUMAN	4	4	4	sp|P32321|DCTD_HUMAN Deoxycytidylate deaminase OS=Homo sapiens OX=9606 GN=DCTD PE=1 SV=2	1	4	4	4	1	0	0	0	2	1	0	0	0	1	0	1	2	2	2	2	3	3	1	0	0	0	2	1	0	0	0	1	0	1	2	2	2	2	3	3	1	0	0	0
sp|P32322|P5CR1_HUMAN	sp|P32322|P5CR1_HUMAN	4	4	3	sp|P32322|P5CR1_HUMAN Pyrroline-5-carboxylate reductase 1, mitochondrial OS=Homo sapiens OX=9606 GN=PYCR1 PE=1 SV=2	1	4	4	3	3	2	2	4	4	3	0	0	0	0	0	0	3	2	3	4	2	3	3	2	2	4	4	3	0	0	0	0	0	0	3	2	3	4	2	3	2	1	1	3
sp|P32455|GBP1_HUMAN;sp|Q9H0R5|GBP3_HUMAN	sp|P32455|GBP1_HUMAN	12;4	12;4	10;4	sp|P32455|GBP1_HUMAN Guanylate-binding protein 1 OS=Homo sapiens OX=9606 GN=GBP1 PE=1 SV=2	2	12	12	10	1	2	2	1	1	1	1	1	1	1	1	1	10	8	8	7	6	7	1	2	2	1	1	1	1	1	1	1	1	1	10	8	8	7	6	7	0	1	1	0
sp|P32456|GBP2_HUMAN	sp|P32456|GBP2_HUMAN	3	1	1	sp|P32456|GBP2_HUMAN Guanylate-binding protein 2 OS=Homo sapiens OX=9606 GN=GBP2 PE=1 SV=3	1	3	1	1	2	2	2	2	2	2	1	1	1	1	1	1	2	1	2	2	2	2	1	1	1	1	1	1	0	0	0	0	0	0	0	0	0	0	0	0	1	1	1	1
sp|P32926|DSG3_HUMAN	sp|P32926|DSG3_HUMAN	32	32	32	sp|P32926|DSG3_HUMAN Desmoglein-3 OS=Homo sapiens OX=9606 GN=DSG3 PE=1 SV=2	1	32	32	32	2	1	2	1	1	3	15	17	15	14	16	16	31	26	30	31	30	30	2	1	2	1	1	3	15	17	15	14	16	16	31	26	30	31	30	30	2	1	2	1
sp|P32969|RL9_HUMAN	sp|P32969|RL9_HUMAN	10	10	10	sp|P32969|RL9_HUMAN 60S ribosomal protein L9 OS=Homo sapiens OX=9606 GN=RPL9 PE=1 SV=1	1	10	10	10	6	5	6	6	6	6	7	5	6	7	6	5	5	5	4	5	5	5	6	5	6	6	6	6	7	5	6	7	6	5	5	5	4	5	5	5	6	5	6	6
sp|P33121|ACSL1_HUMAN	sp|P33121|ACSL1_HUMAN	6	6	6	sp|P33121|ACSL1_HUMAN Long-chain-fatty-acid--CoA ligase 1 OS=Homo sapiens OX=9606 GN=ACSL1 PE=1 SV=1	1	6	6	6	1	0	3	2	1	0	0	0	0	0	1	1	1	1	3	1	2	1	1	0	3	2	1	0	0	0	0	0	1	1	1	1	3	1	2	1	1	0	3	2
sp|P33176|KINH_HUMAN;sp|Q12840|KIF5A_HUMAN	sp|P33176|KINH_HUMAN	28;5	28;5	22;0	sp|P33176|KINH_HUMAN Kinesin-1 heavy chain OS=Homo sapiens OX=9606 GN=KIF5B PE=1 SV=1	2	28	28	22	18	17	13	15	18	17	3	1	2	2	4	2	12	14	13	11	10	11	18	17	13	15	18	17	3	1	2	2	4	2	12	14	13	11	10	11	12	13	8	13
sp|P33240|CSTF2_HUMAN	sp|P33240|CSTF2_HUMAN	3	3	1	sp|P33240|CSTF2_HUMAN Cleavage stimulation factor subunit 2 OS=Homo sapiens OX=9606 GN=CSTF2 PE=1 SV=1	1	3	3	1	2	1	1	2	1	2	1	0	1	1	0	1	1	2	2	3	2	2	2	1	1	2	1	2	1	0	1	1	0	1	1	2	2	3	2	2	1	1	0	1
sp|P33241|LSP1_HUMAN	sp|P33241|LSP1_HUMAN	3	3	3	sp|P33241|LSP1_HUMAN Lymphocyte-specific protein 1 OS=Homo sapiens OX=9606 GN=LSP1 PE=1 SV=1	1	3	3	3	1	1	0	1	1	1	0	0	0	0	0	0	1	2	3	2	1	2	1	1	0	1	1	1	0	0	0	0	0	0	1	2	3	2	1	2	1	1	0	1
sp|P33527|MRP1_HUMAN	sp|P33527|MRP1_HUMAN	11	11	11	sp|P33527|MRP1_HUMAN Multidrug resistance-associated protein 1 OS=Homo sapiens OX=9606 GN=ABCC1 PE=1 SV=3	1	11	11	11	5	4	4	7	4	5	0	0	0	0	0	0	2	0	1	2	1	1	5	4	4	7	4	5	0	0	0	0	0	0	2	0	1	2	1	1	5	4	4	7
sp|P33764|S10A3_HUMAN	sp|P33764|S10A3_HUMAN	5	5	5	sp|P33764|S10A3_HUMAN Protein S100-A3 OS=Homo sapiens OX=9606 GN=S100A3 PE=1 SV=1	1	5	5	5	3	3	4	5	3	3	0	0	0	0	0	0	0	0	0	0	0	0	3	3	4	5	3	3	0	0	0	0	0	0	0	0	0	0	0	0	3	3	4	5
sp|P33897|ABCD1_HUMAN	sp|P33897|ABCD1_HUMAN	3	3	3	sp|P33897|ABCD1_HUMAN ATP-binding cassette sub-family D member 1 OS=Homo sapiens OX=9606 GN=ABCD1 PE=1 SV=2	1	3	3	3	1	1	2	2	2	3	0	0	0	0	0	0	0	0	0	0	0	0	1	1	2	2	2	3	0	0	0	0	0	0	0	0	0	0	0	0	1	1	2	2
sp|P33991|MCM4_HUMAN	sp|P33991|MCM4_HUMAN	14	14	14	sp|P33991|MCM4_HUMAN DNA replication licensing factor MCM4 OS=Homo sapiens OX=9606 GN=MCM4 PE=1 SV=5	1	14	14	14	0	0	1	0	0	0	0	0	0	0	0	0	8	9	10	9	7	7	0	0	1	0	0	0	0	0	0	0	0	0	8	9	10	9	7	7	0	0	1	0
sp|P33992|MCM5_HUMAN	sp|P33992|MCM5_HUMAN	15	15	15	sp|P33992|MCM5_HUMAN DNA replication licensing factor MCM5 OS=Homo sapiens OX=9606 GN=MCM5 PE=1 SV=5	1	15	15	15	0	0	0	0	0	0	0	0	0	0	0	0	10	9	8	10	8	6	0	0	0	0	0	0	0	0	0	0	0	0	10	9	8	10	8	6	0	0	0	0
sp|P33993|MCM7_HUMAN	sp|P33993|MCM7_HUMAN	15	15	15	sp|P33993|MCM7_HUMAN DNA replication licensing factor MCM7 OS=Homo sapiens OX=9606 GN=MCM7 PE=1 SV=4	1	15	15	15	0	1	0	1	1	0	0	0	0	0	0	0	8	9	12	13	8	9	0	1	0	1	1	0	0	0	0	0	0	0	8	9	12	13	8	9	0	1	0	1
sp|P34059|GALNS_HUMAN	sp|P34059|GALNS_HUMAN	3	3	3	sp|P34059|GALNS_HUMAN N-acetylgalactosamine-6-sulfatase OS=Homo sapiens OX=9606 GN=GALNS PE=1 SV=1	1	3	3	3	1	1	0	0	1	2	0	0	0	0	0	0	0	0	0	0	0	0	1	1	0	0	1	2	0	0	0	0	0	0	0	0	0	0	0	0	1	1	0	0
sp|P34810|CD68_HUMAN	sp|P34810|CD68_HUMAN	1	1	1	sp|P34810|CD68_HUMAN Macrosialin OS=Homo sapiens OX=9606 GN=CD68 PE=1 SV=2	1	1	1	1	1	0	0	0	0	0	0	0	0	0	0	0	0	0	1	0	1	1	1	0	0	0	0	0	0	0	0	0	0	0	0	0	1	0	1	1	1	0	0	0
sp|P34896|GLYC_HUMAN	sp|P34896|GLYC_HUMAN	6	5	5	sp|P34896|GLYC_HUMAN Serine hydroxymethyltransferase, cytosolic OS=Homo sapiens OX=9606 GN=SHMT1 PE=1 SV=1	1	6	5	5	0	0	0	0	0	1	2	2	1	1	2	1	0	1	3	1	1	1	0	0	0	0	0	1	1	1	0	0	1	0	0	1	2	1	1	0	0	0	0	0
sp|P34897|GLYM_HUMAN	sp|P34897|GLYM_HUMAN	12	12	11	sp|P34897|GLYM_HUMAN Serine hydroxymethyltransferase, mitochondrial OS=Homo sapiens OX=9606 GN=SHMT2 PE=1 SV=3	1	12	12	11	2	6	4	3	5	5	3	3	3	2	4	2	8	9	8	10	9	11	2	6	4	3	5	5	3	3	3	2	4	2	8	9	8	10	9	11	2	6	4	3
sp|P34913|HYES_HUMAN	sp|P34913|HYES_HUMAN	13	13	13	sp|P34913|HYES_HUMAN Bifunctional epoxide hydrolase 2 OS=Homo sapiens OX=9606 GN=EPHX2 PE=1 SV=2	1	13	13	13	1	0	0	0	0	0	6	4	6	6	5	5	2	5	3	5	4	6	1	0	0	0	0	0	6	4	6	6	5	5	2	5	3	5	4	6	1	0	0	0
sp|P34931|HS71L_HUMAN	sp|P34931|HS71L_HUMAN	16	2	2	sp|P34931|HS71L_HUMAN Heat shock 70 kDa protein 1-like OS=Homo sapiens OX=9606 GN=HSPA1L PE=1 SV=2	1	16	2	2	11	13	11	11	14	12	11	13	10	12	11	13	12	15	14	12	13	13	1	2	1	1	1	1	0	0	0	0	0	0	1	1	1	1	1	1	1	2	1	1
sp|P34932|HSP74_HUMAN	sp|P34932|HSP74_HUMAN	38	38	35	sp|P34932|HSP74_HUMAN Heat shock 70 kDa protein 4 OS=Homo sapiens OX=9606 GN=HSPA4 PE=1 SV=4	1	38	38	35	17	18	23	19	19	23	8	9	12	8	9	11	25	25	23	20	24	28	17	18	23	19	19	23	8	9	12	8	9	11	25	25	23	20	24	28	15	17	20	17
sp|P34949|MPI_HUMAN	sp|P34949|MPI_HUMAN	9	9	9	sp|P34949|MPI_HUMAN Mannose-6-phosphate isomerase OS=Homo sapiens OX=9606 GN=MPI PE=1 SV=2	1	9	9	9	3	5	4	4	3	2	1	1	0	1	1	2	1	2	2	2	4	1	3	5	4	4	3	2	1	1	0	1	1	2	1	2	2	2	4	1	3	5	4	4
sp|P35052|GPC1_HUMAN	sp|P35052|GPC1_HUMAN	6	6	6	sp|P35052|GPC1_HUMAN Glypican-1 OS=Homo sapiens OX=9606 GN=GPC1 PE=1 SV=2	1	6	6	6	0	0	0	0	0	0	1	0	1	0	0	0	4	4	3	2	3	3	0	0	0	0	0	0	1	0	1	0	0	0	4	4	3	2	3	3	0	0	0	0
sp|P35080|PROF2_HUMAN	sp|P35080|PROF2_HUMAN	3	3	3	sp|P35080|PROF2_HUMAN Profilin-2 OS=Homo sapiens OX=9606 GN=PFN2 PE=1 SV=3	1	3	3	3	3	3	3	3	3	3	0	1	1	1	1	1	2	2	2	2	2	2	3	3	3	3	3	3	0	1	1	1	1	1	2	2	2	2	2	2	3	3	3	3
sp|P35219|CAH8_HUMAN	sp|P35219|CAH8_HUMAN	5	5	5	sp|P35219|CAH8_HUMAN Carbonic anhydrase-related protein OS=Homo sapiens OX=9606 GN=CA8 PE=1 SV=3	1	5	5	5	1	4	3	3	3	4	0	0	0	0	0	0	0	0	0	0	0	0	1	4	3	3	3	4	0	0	0	0	0	0	0	0	0	0	0	0	1	4	3	3
sp|P35221|CTNA1_HUMAN;sp|Q9UI47|CTNA3_HUMAN	sp|P35221|CTNA1_HUMAN	37;1	37;1	30;1	sp|P35221|CTNA1_HUMAN Catenin alpha-1 OS=Homo sapiens OX=9606 GN=CTNNA1 PE=1 SV=1	2	37	37	30	24	24	25	24	23	24	7	8	6	4	4	7	27	29	28	29	31	30	24	24	25	24	23	24	7	8	6	4	4	7	27	29	28	29	31	30	20	21	21	21
sp|P35222|CTNB1_HUMAN	sp|P35222|CTNB1_HUMAN	32	27	27	sp|P35222|CTNB1_HUMAN Catenin beta-1 OS=Homo sapiens OX=9606 GN=CTNNB1 PE=1 SV=1	1	32	27	27	22	19	20	21	19	23	15	11	12	12	10	8	23	23	21	19	21	20	20	16	18	18	16	20	10	7	8	7	7	5	18	18	17	15	17	16	20	16	18	18
sp|P35232|PHB_HUMAN	sp|P35232|PHB_HUMAN	20	20	20	sp|P35232|PHB_HUMAN Prohibitin OS=Homo sapiens OX=9606 GN=PHB PE=1 SV=1	1	20	20	20	16	12	12	14	16	15	12	11	13	9	11	9	14	14	13	13	12	13	16	12	12	14	16	15	12	11	13	9	11	9	14	14	13	13	12	13	16	12	12	14
sp|P35237|SPB6_HUMAN	sp|P35237|SPB6_HUMAN	8	8	8	sp|P35237|SPB6_HUMAN Serpin B6 OS=Homo sapiens OX=9606 GN=SERPINB6 PE=1 SV=3	1	8	8	8	1	2	1	1	0	0	3	4	4	3	4	4	5	5	5	4	6	5	1	2	1	1	0	0	3	4	4	3	4	4	5	5	5	4	6	5	1	2	1	1
sp|P35241|RADI_HUMAN	sp|P35241|RADI_HUMAN	23	8	8	sp|P35241|RADI_HUMAN Radixin OS=Homo sapiens OX=9606 GN=RDX PE=1 SV=1	1	23	8	8	10	12	14	13	12	14	11	14	12	14	15	15	19	16	19	18	17	19	3	4	5	5	4	4	2	2	3	2	3	4	6	5	6	5	4	5	3	4	5	5
sp|P35244|RFA3_HUMAN	sp|P35244|RFA3_HUMAN	5	5	5	sp|P35244|RFA3_HUMAN Replication protein A 14 kDa subunit OS=Homo sapiens OX=9606 GN=RPA3 PE=1 SV=1	1	5	5	5	0	0	2	2	1	2	1	2	1	2	3	2	3	2	2	2	3	2	0	0	2	2	1	2	1	2	1	2	3	2	3	2	2	2	3	2	0	0	2	2
sp|P35249|RFC4_HUMAN	sp|P35249|RFC4_HUMAN	3	3	3	sp|P35249|RFC4_HUMAN Replication factor C subunit 4 OS=Homo sapiens OX=9606 GN=RFC4 PE=1 SV=2	1	3	3	3	0	0	0	0	0	0	0	0	0	0	0	0	2	1	2	2	1	3	0	0	0	0	0	0	0	0	0	0	0	0	2	1	2	2	1	3	0	0	0	0
sp|P35250|RFC2_HUMAN	sp|P35250|RFC2_HUMAN	5	5	5	sp|P35250|RFC2_HUMAN Replication factor C subunit 2 OS=Homo sapiens OX=9606 GN=RFC2 PE=1 SV=3	1	5	5	5	0	0	0	0	0	0	0	0	0	0	0	0	4	4	2	2	3	3	0	0	0	0	0	0	0	0	0	0	0	0	4	4	2	2	3	3	0	0	0	0
sp|P35268|RL22_HUMAN	sp|P35268|RL22_HUMAN	2	2	2	sp|P35268|RL22_HUMAN 60S ribosomal protein L22 OS=Homo sapiens OX=9606 GN=RPL22 PE=1 SV=2	1	2	2	2	0	0	0	0	0	0	0	0	1	1	2	2	0	1	1	0	0	0	0	0	0	0	0	0	0	0	1	1	2	2	0	1	1	0	0	0	0	0	0	0
sp|P35270|SPRE_HUMAN	sp|P35270|SPRE_HUMAN	3	3	3	sp|P35270|SPRE_HUMAN Sepiapterin reductase OS=Homo sapiens OX=9606 GN=SPR PE=1 SV=1	1	3	3	3	2	2	2	2	2	2	2	3	3	3	2	3	2	2	3	2	3	3	2	2	2	2	2	2	2	3	3	3	2	3	2	2	3	2	3	3	2	2	2	2
sp|P35321|SPR1A_HUMAN	sp|P35321|SPR1A_HUMAN	3	1	1	sp|P35321|SPR1A_HUMAN Cornifin-A OS=Homo sapiens OX=9606 GN=SPRR1A PE=1 SV=2	1	3	1	1	2	2	3	2	3	2	3	3	3	3	3	3	2	3	3	3	3	3	1	1	1	1	1	1	1	1	1	1	1	1	1	1	1	1	1	1	1	1	1	1
sp|P35325|SPR2B_HUMAN;sp|P22532|SPR2D_HUMAN;sp|P22531|SPR2E_HUMAN;sp|Q9BYE4|SPR2G_HUMAN;sp|Q96RM1|SPR2F_HUMAN	sp|P35325|SPR2B_HUMAN;sp|P22532|SPR2D_HUMAN;sp|P22531|SPR2E_HUMAN;sp|Q9BYE4|SPR2G_HUMAN	4;4;3;2;1	1;1;0;0;0	1;1;0;0;0	sp|P35325|SPR2B_HUMAN Small proline-rich protein 2B OS=Homo sapiens OX=9606 GN=SPRR2B PE=2 SV=1;sp|P22532|SPR2D_HUMAN Small proline-rich protein 2D OS=Homo sapiens OX=9606 GN=SPRR2D PE=2 SV=2;sp|P22531|SPR2E_HUMAN Small proline-rich protein 2E OS=Homo sapi	5	4	1	1	0	0	0	0	0	0	2	2	2	2	2	2	4	4	4	4	3	4	0	0	0	0	0	0	1	1	1	1	1	1	1	1	1	1	1	1	0	0	0	0
sp|P35326|SPR2A_HUMAN	sp|P35326|SPR2A_HUMAN	4	4	1	sp|P35326|SPR2A_HUMAN Small proline-rich protein 2A OS=Homo sapiens OX=9606 GN=SPRR2A PE=1 SV=1	1	4	4	1	0	0	0	0	0	0	2	2	2	2	1	2	4	4	4	4	3	4	0	0	0	0	0	0	2	2	2	2	1	2	4	4	4	4	3	4	0	0	0	0
sp|P35442|TSP2_HUMAN	sp|P35442|TSP2_HUMAN	5	3	3	sp|P35442|TSP2_HUMAN Thrombospondin-2 OS=Homo sapiens OX=9606 GN=THBS2 PE=1 SV=2	1	5	3	3	1	1	1	1	1	1	0	0	0	0	0	0	4	4	2	2	2	2	0	0	0	0	0	0	0	0	0	0	0	0	2	3	0	0	1	1	0	0	0	0
sp|P35499|SCN4A_HUMAN;sp|Q99250|SCN2A_HUMAN	sp|P35499|SCN4A_HUMAN;sp|Q99250|SCN2A_HUMAN	1;1	1;1	1;1	sp|P35499|SCN4A_HUMAN Sodium channel protein type 4 subunit alpha OS=Homo sapiens OX=9606 GN=SCN4A PE=1 SV=4;sp|Q99250|SCN2A_HUMAN Sodium channel protein type 2 subunit alpha OS=Homo sapiens OX=9606 GN=SCN2A PE=1 SV=3	2	1	1	1	1	1	1	1	1	1	0	0	0	0	0	0	0	0	0	0	0	0	1	1	1	1	1	1	0	0	0	0	0	0	0	0	0	0	0	0	1	1	1	1
sp|P35527|K1C9_HUMAN;CON__P35527	sp|P35527|K1C9_HUMAN;CON__P35527	6;6	5;5	5;5	sp|P35527|K1C9_HUMAN Keratin, type I cytoskeletal 9 OS=Homo sapiens OX=9606 GN=KRT9 PE=1 SV=3;	2	6	5	5	1	1	1	0	1	1	2	3	1	1	1	2	1	1	1	2	1	1	0	0	0	0	0	0	1	2	1	1	1	2	1	0	0	1	0	0	0	0	0	0
sp|P35542|SAA4_HUMAN	sp|P35542|SAA4_HUMAN	3	3	3	sp|P35542|SAA4_HUMAN Serum amyloid A-4 protein OS=Homo sapiens OX=9606 GN=SAA4 PE=1 SV=2	1	3	3	3	2	2	2	2	2	2	2	2	3	2	2	2	1	1	1	1	1	1	2	2	2	2	2	2	2	2	3	2	2	2	1	1	1	1	1	1	2	2	2	2
sp|P35555|FBN1_HUMAN	sp|P35555|FBN1_HUMAN	54	54	51	sp|P35555|FBN1_HUMAN Fibrillin-1 OS=Homo sapiens OX=9606 GN=FBN1 PE=1 SV=4	1	54	54	51	0	0	0	0	0	0	41	44	46	42	41	38	0	0	0	0	0	0	0	0	0	0	0	0	41	44	46	42	41	38	0	0	0	0	0	0	0	0	0	0
sp|P35556|FBN2_HUMAN	sp|P35556|FBN2_HUMAN	5	2	2	sp|P35556|FBN2_HUMAN Fibrillin-2 OS=Homo sapiens OX=9606 GN=FBN2 PE=1 SV=3	1	5	2	2	0	0	0	1	1	0	3	2	2	3	3	2	0	0	0	0	0	0	0	0	0	1	1	0	1	0	0	1	0	0	0	0	0	0	0	0	0	0	0	1
sp|P35573|GDE_HUMAN	sp|P35573|GDE_HUMAN	17	17	17	sp|P35573|GDE_HUMAN Glycogen debranching enzyme OS=Homo sapiens OX=9606 GN=AGL PE=1 SV=3	1	17	17	17	1	2	1	1	1	1	1	1	1	0	1	1	7	6	7	7	6	7	1	2	1	1	1	1	1	1	1	0	1	1	7	6	7	7	6	7	1	2	1	1
sp|P35579|MYH9_HUMAN;REV__sp|Q9UKV3|ACINU_HUMAN	sp|P35579|MYH9_HUMAN	120;1	120;1	101;1	sp|P35579|MYH9_HUMAN Myosin-9 OS=Homo sapiens OX=9606 GN=MYH9 PE=1 SV=4	2	120	120	101	84	89	92	88	92	90	48	47	52	57	47	49	90	92	92	96	93	99	84	89	92	88	92	90	48	47	52	57	47	49	90	92	92	96	93	99	70	75	79	74
sp|P35580|MYH10_HUMAN	sp|P35580|MYH10_HUMAN	51	30	30	sp|P35580|MYH10_HUMAN Myosin-10 OS=Homo sapiens OX=9606 GN=MYH10 PE=1 SV=3	1	51	30	30	31	33	29	34	35	32	17	14	16	17	14	16	15	11	14	14	15	13	17	18	17	22	21	19	3	1	3	4	4	2	3	0	2	3	2	1	17	18	17	22
sp|P35606|COPB2_HUMAN	sp|P35606|COPB2_HUMAN	26	26	26	sp|P35606|COPB2_HUMAN Coatomer subunit beta OS=Homo sapiens OX=9606 GN=COPB2 PE=1 SV=2	1	26	26	26	18	16	17	19	15	13	6	5	4	4	4	4	15	16	15	14	16	15	18	16	17	19	15	13	6	5	4	4	4	4	15	16	15	14	16	15	18	16	17	19
sp|P35611|ADDA_HUMAN	sp|P35611|ADDA_HUMAN	8	8	8	sp|P35611|ADDA_HUMAN Alpha-adducin OS=Homo sapiens OX=9606 GN=ADD1 PE=1 SV=2	1	8	8	8	4	5	6	4	4	4	1	1	2	4	2	2	4	4	5	7	6	5	4	5	6	4	4	4	1	1	2	4	2	2	4	4	5	7	6	5	4	5	6	4
sp|P35613|BASI_HUMAN	sp|P35613|BASI_HUMAN	5	5	5	sp|P35613|BASI_HUMAN Basigin OS=Homo sapiens OX=9606 GN=BSG PE=1 SV=2	1	5	5	5	4	5	5	5	4	4	1	1	1	1	1	1	2	2	2	2	2	3	4	5	5	5	4	4	1	1	1	1	1	1	2	2	2	2	2	3	4	5	5	5
sp|P35625|TIMP3_HUMAN	sp|P35625|TIMP3_HUMAN	5	5	5	sp|P35625|TIMP3_HUMAN Metalloproteinase inhibitor 3 OS=Homo sapiens OX=9606 GN=TIMP3 PE=1 SV=2	1	5	5	5	0	0	0	0	0	0	3	5	5	3	4	4	0	0	0	0	0	0	0	0	0	0	0	0	3	5	5	3	4	4	0	0	0	0	0	0	0	0	0	0
sp|P35637|FUS_HUMAN	sp|P35637|FUS_HUMAN	4	4	4	sp|P35637|FUS_HUMAN RNA-binding protein FUS OS=Homo sapiens OX=9606 GN=FUS PE=1 SV=1	1	4	4	4	1	1	2	1	2	1	1	1	1	1	1	1	3	3	3	3	3	4	1	1	2	1	2	1	1	1	1	1	1	1	3	3	3	3	3	4	1	1	2	1
sp|P35658|NU214_HUMAN	sp|P35658|NU214_HUMAN	6	6	6	sp|P35658|NU214_HUMAN Nuclear pore complex protein Nup214 OS=Homo sapiens OX=9606 GN=NUP214 PE=1 SV=2	1	6	6	6	0	0	1	2	1	0	0	0	0	0	0	0	3	3	0	4	2	5	0	0	1	2	1	0	0	0	0	0	0	0	3	3	0	4	2	5	0	0	1	2
sp|P35659|DEK_HUMAN	sp|P35659|DEK_HUMAN	6	6	6	sp|P35659|DEK_HUMAN Protein DEK OS=Homo sapiens OX=9606 GN=DEK PE=1 SV=1	1	6	6	6	2	1	2	3	1	2	0	3	2	1	0	0	3	2	0	2	0	2	2	1	2	3	1	2	0	3	2	1	0	0	3	2	0	2	0	2	2	1	2	3
sp|P35749|MYH11_HUMAN;sp|P13533|MYH6_HUMAN	sp|P35749|MYH11_HUMAN	77;1	65;1	59;0	sp|P35749|MYH11_HUMAN Myosin-11 OS=Homo sapiens OX=9606 GN=MYH11 PE=1 SV=3	2	77	65	59	35	37	37	37	35	34	51	53	47	48	46	49	9	9	11	12	14	13	26	28	28	28	25	25	43	45	39	38	39	40	1	2	2	3	3	3	23	24	25	26
sp|P35754|GLRX1_HUMAN	sp|P35754|GLRX1_HUMAN	4	4	4	sp|P35754|GLRX1_HUMAN Glutaredoxin-1 OS=Homo sapiens OX=9606 GN=GLRX PE=1 SV=2	1	4	4	4	3	3	3	4	3	2	2	2	2	2	2	2	3	3	3	3	2	3	3	3	3	4	3	2	2	2	2	2	2	2	3	3	3	3	2	3	3	3	3	4
sp|P35813|PPM1A_HUMAN	sp|P35813|PPM1A_HUMAN	5	5	5	sp|P35813|PPM1A_HUMAN Protein phosphatase 1A OS=Homo sapiens OX=9606 GN=PPM1A PE=1 SV=1	1	5	5	5	3	2	3	1	3	3	0	0	0	0	0	0	1	4	2	2	3	2	3	2	3	1	3	3	0	0	0	0	0	0	1	4	2	2	3	2	3	2	3	1
sp|P35858|ALS_HUMAN	sp|P35858|ALS_HUMAN	8	8	8	sp|P35858|ALS_HUMAN Insulin-like growth factor-binding protein complex acid labile subunit OS=Homo sapiens OX=9606 GN=IGFALS PE=1 SV=1	1	8	8	8	2	2	2	2	3	2	6	7	6	6	7	6	2	2	2	2	2	1	2	2	2	2	3	2	6	7	6	6	7	6	2	2	2	2	2	1	2	2	2	2
sp|P35914|HMGCL_HUMAN	sp|P35914|HMGCL_HUMAN	8	8	8	sp|P35914|HMGCL_HUMAN Hydroxymethylglutaryl-CoA lyase, mitochondrial OS=Homo sapiens OX=9606 GN=HMGCL PE=1 SV=2	1	8	8	8	5	8	8	8	6	5	5	4	5	2	4	4	4	4	4	5	5	4	5	8	8	8	6	5	5	4	5	2	4	4	4	4	4	5	5	4	5	8	8	8
sp|P35998|PRS7_HUMAN	sp|P35998|PRS7_HUMAN	20	20	20	sp|P35998|PRS7_HUMAN 26S proteasome regulatory subunit 7 OS=Homo sapiens OX=9606 GN=PSMC2 PE=1 SV=3	1	20	20	20	14	15	12	12	15	13	3	3	4	4	4	2	10	11	10	12	14	12	14	15	12	12	15	13	3	3	4	4	4	2	10	11	10	12	14	12	14	15	12	12
sp|P36269|GGT5_HUMAN	sp|P36269|GGT5_HUMAN	7	7	7	sp|P36269|GGT5_HUMAN Glutathione hydrolase 5 proenzyme OS=Homo sapiens OX=9606 GN=GGT5 PE=1 SV=2	1	7	7	7	1	1	1	2	2	2	3	4	5	5	6	5	0	1	2	3	2	2	1	1	1	2	2	2	3	4	5	5	6	5	0	1	2	3	2	2	1	1	1	2
sp|P36404|ARL2_HUMAN	sp|P36404|ARL2_HUMAN	1	1	1	sp|P36404|ARL2_HUMAN ADP-ribosylation factor-like protein 2 OS=Homo sapiens OX=9606 GN=ARL2 PE=1 SV=4	1	1	1	1	0	0	0	0	0	0	0	0	1	0	1	1	0	0	0	0	0	0	0	0	0	0	0	0	0	0	1	0	1	1	0	0	0	0	0	0	0	0	0	0
sp|P36405|ARL3_HUMAN	sp|P36405|ARL3_HUMAN	4	4	4	sp|P36405|ARL3_HUMAN ADP-ribosylation factor-like protein 3 OS=Homo sapiens OX=9606 GN=ARL3 PE=1 SV=2	1	4	4	4	1	1	2	2	2	2	1	1	1	2	2	2	1	1	1	0	1	1	1	1	2	2	2	2	1	1	1	2	2	2	1	1	1	0	1	1	1	1	2	2
sp|P36406|TRI23_HUMAN	sp|P36406|TRI23_HUMAN	1	1	1	sp|P36406|TRI23_HUMAN E3 ubiquitin-protein ligase TRIM23 OS=Homo sapiens OX=9606 GN=TRIM23 PE=1 SV=1	1	1	1	1	1	1	1	1	1	1	0	1	1	1	1	1	1	1	1	1	1	1	1	1	1	1	1	1	0	1	1	1	1	1	1	1	1	1	1	1	1	1	1	1
sp|P36507|MP2K2_HUMAN	sp|P36507|MP2K2_HUMAN	8	4	4	sp|P36507|MP2K2_HUMAN Dual specificity mitogen-activated protein kinase kinase 2 OS=Homo sapiens OX=9606 GN=MAP2K2 PE=1 SV=1	1	8	4	4	2	3	3	3	2	2	1	1	1	1	1	1	3	5	3	4	4	4	0	2	1	1	0	1	0	0	0	0	0	0	1	2	1	1	2	1	0	2	1	1
sp|P36542|ATPG_HUMAN	sp|P36542|ATPG_HUMAN	7	7	7	sp|P36542|ATPG_HUMAN ATP synthase subunit gamma, mitochondrial OS=Homo sapiens OX=9606 GN=ATP5F1C PE=1 SV=1	1	7	7	7	5	5	6	5	6	6	5	3	5	6	6	4	7	6	6	6	4	4	5	5	6	5	6	6	5	3	5	6	6	4	7	6	6	6	4	4	5	5	6	5
sp|P36543|VATE1_HUMAN	sp|P36543|VATE1_HUMAN	4	4	4	sp|P36543|VATE1_HUMAN V-type proton ATPase subunit E 1 OS=Homo sapiens OX=9606 GN=ATP6V1E1 PE=1 SV=1	1	4	4	4	1	1	2	1	1	2	2	2	1	1	1	2	0	2	1	1	1	1	1	1	2	1	1	2	2	2	1	1	1	2	0	2	1	1	1	1	1	1	2	1
sp|P36551|HEM6_HUMAN	sp|P36551|HEM6_HUMAN	1	1	1	sp|P36551|HEM6_HUMAN Oxygen-dependent coproporphyrinogen-III oxidase, mitochondrial OS=Homo sapiens OX=9606 GN=CPOX PE=1 SV=3	1	1	1	1	0	0	0	0	1	0	0	0	1	1	1	1	1	1	1	1	1	1	0	0	0	0	1	0	0	0	1	1	1	1	1	1	1	1	1	1	0	0	0	0
sp|P36578|RL4_HUMAN	sp|P36578|RL4_HUMAN	14	14	14	sp|P36578|RL4_HUMAN 60S ribosomal protein L4 OS=Homo sapiens OX=9606 GN=RPL4 PE=1 SV=5	1	14	14	14	5	5	8	6	5	4	6	3	6	5	7	7	5	3	4	5	5	3	5	5	8	6	5	4	6	3	6	5	7	7	5	3	4	5	5	3	5	5	8	6
sp|P36776|LONM_HUMAN	sp|P36776|LONM_HUMAN	10	10	10	sp|P36776|LONM_HUMAN Lon protease homolog, mitochondrial OS=Homo sapiens OX=9606 GN=LONP1 PE=1 SV=2	1	10	10	10	7	3	2	3	5	6	2	2	2	2	2	2	6	5	5	6	5	7	7	3	2	3	5	6	2	2	2	2	2	2	6	5	5	6	5	7	7	3	2	3
sp|P36871|PGM1_HUMAN	sp|P36871|PGM1_HUMAN	14	14	14	sp|P36871|PGM1_HUMAN Phosphoglucomutase-1 OS=Homo sapiens OX=9606 GN=PGM1 PE=1 SV=3	1	14	14	14	9	9	10	10	9	7	5	6	6	5	4	5	9	7	11	8	9	9	9	9	10	10	9	7	5	6	6	5	4	5	9	7	11	8	9	9	9	9	10	10
sp|P36873|PP1G_HUMAN	sp|P36873|PP1G_HUMAN	16	16	3	sp|P36873|PP1G_HUMAN Serine/threonine-protein phosphatase PP1-gamma catalytic subunit OS=Homo sapiens OX=9606 GN=PPP1CC PE=1 SV=1	1	16	16	3	9	7	8	9	8	11	6	7	9	6	6	7	11	11	11	11	13	11	9	7	8	9	8	11	6	7	9	6	6	7	11	11	11	11	13	11	1	1	1	1
sp|P36915|GNL1_HUMAN	sp|P36915|GNL1_HUMAN	3	3	3	sp|P36915|GNL1_HUMAN Guanine nucleotide-binding protein-like 1 OS=Homo sapiens OX=9606 GN=GNL1 PE=1 SV=2	1	3	3	3	2	1	0	1	0	2	1	1	1	1	1	1	1	1	3	2	1	2	2	1	0	1	0	2	1	1	1	1	1	1	1	1	3	2	1	2	2	1	0	1
sp|P36952|SPB5_HUMAN	sp|P36952|SPB5_HUMAN	19	19	19	sp|P36952|SPB5_HUMAN Serpin B5 OS=Homo sapiens OX=9606 GN=SERPINB5 PE=1 SV=2	1	19	19	19	6	7	6	6	6	8	6	8	9	6	7	6	15	16	15	13	17	17	6	7	6	6	6	8	6	8	9	6	7	6	15	16	15	13	17	17	6	7	6	6
sp|P36955|PEDF_HUMAN;CON__Q95121	sp|P36955|PEDF_HUMAN	15;4	15;4	15;4	sp|P36955|PEDF_HUMAN Pigment epithelium-derived factor OS=Homo sapiens OX=9606 GN=SERPINF1 PE=1 SV=4	2	15	15	15	7	8	8	8	8	8	14	12	12	13	13	13	7	7	9	6	7	8	7	8	8	8	8	8	14	12	12	13	13	13	7	7	9	6	7	8	7	8	8	8
sp|P36957|ODO2_HUMAN	sp|P36957|ODO2_HUMAN	9	9	9	sp|P36957|ODO2_HUMAN Dihydrolipoyllysine-residue succinyltransferase component of 2-oxoglutarate dehydrogenase complex, mitochondrial OS=Homo sapiens OX=9606 GN=DLST PE=1 SV=4	1	9	9	9	7	6	6	7	7	6	6	6	7	6	6	6	6	7	8	7	7	6	7	6	6	7	7	6	6	6	7	6	6	6	6	7	8	7	7	6	7	6	6	7
sp|P36959|GMPR1_HUMAN	sp|P36959|GMPR1_HUMAN	1	1	1	sp|P36959|GMPR1_HUMAN GMP reductase 1 OS=Homo sapiens OX=9606 GN=GMPR PE=1 SV=1	1	1	1	1	1	1	1	1	1	1	0	0	0	0	0	0	1	0	0	0	0	0	1	1	1	1	1	1	0	0	0	0	0	0	1	0	0	0	0	0	1	1	1	1
sp|P36969|GPX4_HUMAN	sp|P36969|GPX4_HUMAN	2	2	2	sp|P36969|GPX4_HUMAN Phospholipid hydroperoxide glutathione peroxidase OS=Homo sapiens OX=9606 GN=GPX4 PE=1 SV=3	1	2	2	2	2	2	2	2	2	2	0	1	1	1	1	1	2	1	2	1	2	2	2	2	2	2	2	2	0	1	1	1	1	1	2	1	2	1	2	2	2	2	2	2
sp|P37108|SRP14_HUMAN	sp|P37108|SRP14_HUMAN	6	6	6	sp|P37108|SRP14_HUMAN Signal recognition particle 14 kDa protein OS=Homo sapiens OX=9606 GN=SRP14 PE=1 SV=2	1	6	6	6	2	2	2	2	3	3	3	1	2	3	2	3	1	1	1	1	1	1	2	2	2	2	3	3	3	1	2	3	2	3	1	1	1	1	1	1	2	2	2	2
sp|P37198|NUP62_HUMAN	sp|P37198|NUP62_HUMAN	3	3	3	sp|P37198|NUP62_HUMAN Nuclear pore glycoprotein p62 OS=Homo sapiens OX=9606 GN=NUP62 PE=1 SV=3	1	3	3	3	1	1	2	1	1	1	1	1	0	0	2	1	1	1	1	1	0	1	1	1	2	1	1	1	1	1	0	0	2	1	1	1	1	1	0	1	1	1	2	1
sp|P37802|TAGL2_HUMAN	sp|P37802|TAGL2_HUMAN	15	15	14	sp|P37802|TAGL2_HUMAN Transgelin-2 OS=Homo sapiens OX=9606 GN=TAGLN2 PE=1 SV=3	1	15	15	14	12	13	13	13	12	12	13	14	14	12	14	14	13	13	13	14	14	13	12	13	13	13	12	12	13	14	14	12	14	14	13	13	13	14	14	13	11	12	12	12
sp|P37837|TALDO_HUMAN	sp|P37837|TALDO_HUMAN	14	14	14	sp|P37837|TALDO_HUMAN Transaldolase OS=Homo sapiens OX=9606 GN=TALDO1 PE=1 SV=2	1	14	14	14	8	9	7	10	10	10	7	8	10	6	7	8	12	12	11	11	10	10	8	9	7	10	10	10	7	8	10	6	7	8	12	12	11	11	10	10	8	9	7	10
sp|P37840|SYUA_HUMAN	sp|P37840|SYUA_HUMAN	4	4	4	sp|P37840|SYUA_HUMAN Alpha-synuclein OS=Homo sapiens OX=9606 GN=SNCA PE=1 SV=1	1	4	4	4	2	2	2	2	2	2	4	4	4	4	2	3	2	2	3	3	2	3	2	2	2	2	2	2	4	4	4	4	2	3	2	2	3	3	2	3	2	2	2	2
sp|P38117|ETFB_HUMAN	sp|P38117|ETFB_HUMAN	10	10	10	sp|P38117|ETFB_HUMAN Electron transfer flavoprotein subunit beta OS=Homo sapiens OX=9606 GN=ETFB PE=1 SV=3	1	10	10	10	6	6	6	5	4	7	3	2	2	3	2	3	8	7	8	7	7	7	6	6	6	5	4	7	3	2	2	3	2	3	8	7	8	7	7	7	6	6	6	5
sp|P38159|RBMX_HUMAN;sp|Q96E39|RMXL1_HUMAN;sp|O75526|RMXL2_HUMAN;sp|Q8N7X1|RMXL3_HUMAN	sp|P38159|RBMX_HUMAN	5;2;2;1	5;2;2;1	5;2;2;1	sp|P38159|RBMX_HUMAN RNA-binding motif protein, X chromosome OS=Homo sapiens OX=9606 GN=RBMX PE=1 SV=3	4	5	5	5	5	5	5	5	5	5	5	5	5	4	5	4	5	5	5	5	5	5	5	5	5	5	5	5	5	5	5	4	5	4	5	5	5	5	5	5	5	5	5	5
sp|P38435|VKGC_HUMAN	sp|P38435|VKGC_HUMAN	2	2	2	sp|P38435|VKGC_HUMAN Vitamin K-dependent gamma-carboxylase OS=Homo sapiens OX=9606 GN=GGCX PE=1 SV=2	1	2	2	2	1	1	1	2	2	2	0	0	0	0	0	0	1	1	0	0	0	1	1	1	1	2	2	2	0	0	0	0	0	0	1	1	0	0	0	1	1	1	1	2
sp|P38571|LICH_HUMAN	sp|P38571|LICH_HUMAN	2	2	2	sp|P38571|LICH_HUMAN Lysosomal acid lipase/cholesteryl ester hydrolase OS=Homo sapiens OX=9606 GN=LIPA PE=1 SV=2	1	2	2	2	1	1	1	1	1	1	0	1	0	0	1	0	1	1	1	2	1	1	1	1	1	1	1	1	0	1	0	0	1	0	1	1	1	2	1	1	1	1	1	1
sp|P38606|VATA_HUMAN	sp|P38606|VATA_HUMAN	24	24	24	sp|P38606|VATA_HUMAN V-type proton ATPase catalytic subunit A OS=Homo sapiens OX=9606 GN=ATP6V1A PE=1 SV=2	1	24	24	24	15	19	18	17	16	17	4	3	4	4	5	3	19	19	19	17	19	17	15	19	18	17	16	17	4	3	4	4	5	3	19	19	19	17	19	17	15	19	18	17
sp|P38646|GRP75_HUMAN	sp|P38646|GRP75_HUMAN	34	33	33	sp|P38646|GRP75_HUMAN Stress-70 protein, mitochondrial OS=Homo sapiens OX=9606 GN=HSPA9 PE=1 SV=2	1	34	33	33	23	21	21	24	22	23	17	17	13	15	15	14	21	21	24	22	23	24	22	20	20	23	21	22	16	16	13	14	15	14	21	21	24	21	23	24	22	20	20	23
sp|P38919|IF4A3_HUMAN	sp|P38919|IF4A3_HUMAN	17	15	15	sp|P38919|IF4A3_HUMAN Eukaryotic initiation factor 4A-III OS=Homo sapiens OX=9606 GN=EIF4A3 PE=1 SV=4	1	17	15	15	13	11	12	10	11	10	4	3	3	2	2	3	10	12	11	11	9	10	11	10	11	9	10	9	3	2	2	1	1	2	9	11	10	10	8	9	11	10	11	9
sp|P39019|RS19_HUMAN	sp|P39019|RS19_HUMAN	7	7	7	sp|P39019|RS19_HUMAN 40S ribosomal protein S19 OS=Homo sapiens OX=9606 GN=RPS19 PE=1 SV=2	1	7	7	7	4	4	4	2	2	4	4	5	5	5	3	4	4	4	3	3	3	4	4	4	4	2	2	4	4	5	5	5	3	4	4	4	3	3	3	4	4	4	4	2
sp|P39023|RL3_HUMAN	sp|P39023|RL3_HUMAN	10	10	10	sp|P39023|RL3_HUMAN 60S ribosomal protein L3 OS=Homo sapiens OX=9606 GN=RPL3 PE=1 SV=2	1	10	10	10	6	6	6	6	6	6	8	7	7	8	9	8	6	4	5	6	5	5	6	6	6	6	6	6	8	7	7	8	9	8	6	4	5	6	5	5	6	6	6	6
sp|P39059|COFA1_HUMAN	sp|P39059|COFA1_HUMAN	4	4	4	sp|P39059|COFA1_HUMAN Collagen alpha-1(XV) chain OS=Homo sapiens OX=9606 GN=COL15A1 PE=1 SV=2	1	4	4	4	0	0	0	0	0	0	3	2	2	2	3	4	0	0	0	0	0	0	0	0	0	0	0	0	3	2	2	2	3	4	0	0	0	0	0	0	0	0	0	0
sp|P39060|COIA1_HUMAN	sp|P39060|COIA1_HUMAN	13	13	13	sp|P39060|COIA1_HUMAN Collagen alpha-1(XVIII) chain OS=Homo sapiens OX=9606 GN=COL18A1 PE=1 SV=5	1	13	13	13	5	3	4	6	4	4	6	9	6	7	6	8	3	4	2	2	2	4	5	3	4	6	4	4	6	9	6	7	6	8	3	4	2	2	2	4	5	3	4	6
sp|P39656|OST48_HUMAN	sp|P39656|OST48_HUMAN	13	13	13	sp|P39656|OST48_HUMAN Dolichyl-diphosphooligosaccharide--protein glycosyltransferase 48 kDa subunit OS=Homo sapiens OX=9606 GN=DDOST PE=1 SV=4	1	13	13	13	10	7	9	8	9	9	4	5	3	3	4	5	8	8	8	8	4	4	10	7	9	8	9	9	4	5	3	3	4	5	8	8	8	8	4	4	10	7	9	8
sp|P39687|AN32A_HUMAN;sp|O95626|AN32D_HUMAN;sp|O43423|AN32C_HUMAN	sp|P39687|AN32A_HUMAN	10;2;2	10;2;2	8;2;2	sp|P39687|AN32A_HUMAN Acidic leucine-rich nuclear phosphoprotein 32 family member A OS=Homo sapiens OX=9606 GN=ANP32A PE=1 SV=1	3	10	10	8	6	6	6	6	5	5	2	2	4	2	3	4	4	4	4	7	7	7	6	6	6	6	5	5	2	2	4	2	3	4	4	4	4	7	7	7	5	5	5	4
sp|P39748|FEN1_HUMAN	sp|P39748|FEN1_HUMAN	6	6	6	sp|P39748|FEN1_HUMAN Flap endonuclease 1 OS=Homo sapiens OX=9606 GN=FEN1 PE=1 SV=1	1	6	6	6	0	0	0	0	0	1	0	0	0	0	0	0	4	2	2	3	3	4	0	0	0	0	0	1	0	0	0	0	0	0	4	2	2	3	3	4	0	0	0	0
sp|P40121|CAPG_HUMAN	sp|P40121|CAPG_HUMAN	13	13	13	sp|P40121|CAPG_HUMAN Macrophage-capping protein OS=Homo sapiens OX=9606 GN=CAPG PE=1 SV=2	1	13	13	13	10	9	10	10	10	11	8	8	8	8	9	9	10	12	11	11	11	10	10	9	10	10	10	11	8	8	8	8	9	9	10	12	11	11	11	10	10	9	10	10
sp|P40123|CAP2_HUMAN	sp|P40123|CAP2_HUMAN	4	3	3	sp|P40123|CAP2_HUMAN Adenylyl cyclase-associated protein 2 OS=Homo sapiens OX=9606 GN=CAP2 PE=1 SV=1	1	4	3	3	0	0	1	2	2	2	2	3	4	1	2	2	1	0	0	1	0	1	0	0	1	1	1	1	1	2	3	1	1	2	1	0	0	1	0	1	0	0	1	1
sp|P40222|TXLNA_HUMAN	sp|P40222|TXLNA_HUMAN	6	6	6	sp|P40222|TXLNA_HUMAN Alpha-taxilin OS=Homo sapiens OX=9606 GN=TXLNA PE=1 SV=3	1	6	6	6	1	2	2	1	1	2	0	0	0	0	0	0	3	3	1	3	3	4	1	2	2	1	1	2	0	0	0	0	0	0	3	3	1	3	3	4	1	2	2	1
sp|P40227|TCPZ_HUMAN	sp|P40227|TCPZ_HUMAN	26	26	20	sp|P40227|TCPZ_HUMAN T-complex protein 1 subunit zeta OS=Homo sapiens OX=9606 GN=CCT6A PE=1 SV=3	1	26	26	20	15	17	14	17	17	14	11	11	10	10	12	12	23	23	24	23	24	22	15	17	14	17	17	14	11	11	10	10	12	12	23	23	24	23	24	22	11	13	12	13
sp|P40261|NNMT_HUMAN	sp|P40261|NNMT_HUMAN	5	5	5	sp|P40261|NNMT_HUMAN Nicotinamide N-methyltransferase OS=Homo sapiens OX=9606 GN=NNMT PE=1 SV=1	1	5	5	5	0	0	1	1	1	0	0	0	0	0	0	0	3	3	4	3	4	5	0	0	1	1	1	0	0	0	0	0	0	0	3	3	4	3	4	5	0	0	1	1
sp|P40305|IFI27_HUMAN	sp|P40305|IFI27_HUMAN	1	1	1	sp|P40305|IFI27_HUMAN Interferon alpha-inducible protein 27, mitochondrial OS=Homo sapiens OX=9606 GN=IFI27 PE=1 SV=4	1	1	1	1	0	0	0	0	0	0	0	0	0	0	0	0	1	0	0	1	1	0	0	0	0	0	0	0	0	0	0	0	0	0	1	0	0	1	1	0	0	0	0	0
sp|P40306|PSB10_HUMAN	sp|P40306|PSB10_HUMAN	5	5	5	sp|P40306|PSB10_HUMAN Proteasome subunit beta type-10 OS=Homo sapiens OX=9606 GN=PSMB10 PE=1 SV=1	1	5	5	5	0	1	1	1	1	2	0	1	1	0	0	1	4	3	2	4	4	4	0	1	1	1	1	2	0	1	1	0	0	1	4	3	2	4	4	4	0	1	1	1
sp|P40394|ADH7_HUMAN	sp|P40394|ADH7_HUMAN	8	8	8	sp|P40394|ADH7_HUMAN All-trans-retinol dehydrogenase [NAD(+)] ADH7 OS=Homo sapiens OX=9606 GN=ADH7 PE=1 SV=2	1	8	8	8	0	0	0	0	0	0	1	1	1	1	1	1	5	4	5	6	6	5	0	0	0	0	0	0	1	1	1	1	1	1	5	4	5	6	6	5	0	0	0	0
sp|P40429|RL13A_HUMAN;sp|Q6NVV1|R13P3_HUMAN	sp|P40429|RL13A_HUMAN	3;1	3;1	3;1	sp|P40429|RL13A_HUMAN 60S ribosomal protein L13a OS=Homo sapiens OX=9606 GN=RPL13A PE=1 SV=2	2	3	3	3	2	1	1	1	3	2	2	2	2	2	3	3	2	3	2	3	3	3	2	1	1	1	3	2	2	2	2	2	3	3	2	3	2	3	3	3	2	1	1	1
sp|P40616|ARL1_HUMAN	sp|P40616|ARL1_HUMAN	4	4	4	sp|P40616|ARL1_HUMAN ADP-ribosylation factor-like protein 1 OS=Homo sapiens OX=9606 GN=ARL1 PE=1 SV=1	1	4	4	4	3	2	3	3	3	3	0	0	0	0	0	0	4	4	2	3	2	3	3	2	3	3	3	3	0	0	0	0	0	0	4	4	2	3	2	3	3	2	3	3
sp|P40763|STAT3_HUMAN	sp|P40763|STAT3_HUMAN	20	20	20	sp|P40763|STAT3_HUMAN Signal transducer and activator of transcription 3 OS=Homo sapiens OX=9606 GN=STAT3 PE=1 SV=2	1	20	20	20	4	5	5	3	5	3	1	1	1	2	0	2	12	15	14	15	17	15	4	5	5	3	5	3	1	1	1	2	0	2	12	15	14	15	17	15	4	5	5	3
sp|P40855|PEX19_HUMAN	sp|P40855|PEX19_HUMAN	4	4	4	sp|P40855|PEX19_HUMAN Peroxisomal biogenesis factor 19 OS=Homo sapiens OX=9606 GN=PEX19 PE=1 SV=1	1	4	4	4	2	3	1	1	2	1	0	0	0	0	0	0	3	3	3	2	4	3	2	3	1	1	2	1	0	0	0	0	0	0	3	3	3	2	4	3	2	3	1	1
sp|P40925|MDHC_HUMAN	sp|P40925|MDHC_HUMAN	12	12	12	sp|P40925|MDHC_HUMAN Malate dehydrogenase, cytoplasmic OS=Homo sapiens OX=9606 GN=MDH1 PE=1 SV=4	1	12	12	12	9	8	8	8	8	9	8	6	8	7	7	6	10	8	8	8	7	9	9	8	8	8	8	9	8	6	8	7	7	6	10	8	8	8	7	9	9	8	8	8
sp|P40926|MDHM_HUMAN	sp|P40926|MDHM_HUMAN	15	15	15	sp|P40926|MDHM_HUMAN Malate dehydrogenase, mitochondrial OS=Homo sapiens OX=9606 GN=MDH2 PE=1 SV=3	1	15	15	15	11	12	11	12	12	11	13	13	12	14	12	12	13	12	13	13	14	12	11	12	11	12	12	11	13	13	12	14	12	12	13	12	13	13	14	12	11	12	11	12
sp|P40937|RFC5_HUMAN	sp|P40937|RFC5_HUMAN	1	1	1	sp|P40937|RFC5_HUMAN Replication factor C subunit 5 OS=Homo sapiens OX=9606 GN=RFC5 PE=1 SV=1	1	1	1	1	0	0	0	0	0	0	0	0	0	0	0	0	1	1	1	1	1	1	0	0	0	0	0	0	0	0	0	0	0	0	1	1	1	1	1	1	0	0	0	0
sp|P40938|RFC3_HUMAN	sp|P40938|RFC3_HUMAN	1	1	1	sp|P40938|RFC3_HUMAN Replication factor C subunit 3 OS=Homo sapiens OX=9606 GN=RFC3 PE=1 SV=2	1	1	1	1	0	0	0	0	0	0	0	0	0	0	0	0	1	1	1	1	0	0	0	0	0	0	0	0	0	0	0	0	0	0	1	1	1	1	0	0	0	0	0	0
sp|P40939|ECHA_HUMAN	sp|P40939|ECHA_HUMAN	31	31	31	sp|P40939|ECHA_HUMAN Trifunctional enzyme subunit alpha, mitochondrial OS=Homo sapiens OX=9606 GN=HADHA PE=1 SV=2	1	31	31	31	20	19	20	21	20	21	11	9	11	10	11	9	24	20	23	19	20	24	20	19	20	21	20	21	11	9	11	10	11	9	24	20	23	19	20	24	20	19	20	21
sp|P41091|IF2G_HUMAN;sp|Q2VIR3|IF2GL_HUMAN	sp|P41091|IF2G_HUMAN;sp|Q2VIR3|IF2GL_HUMAN	14;11	14;11	14;11	sp|P41091|IF2G_HUMAN Eukaryotic translation initiation factor 2 subunit 3 OS=Homo sapiens OX=9606 GN=EIF2S3 PE=1 SV=3;sp|Q2VIR3|IF2GL_HUMAN Eukaryotic translation initiation factor 2 subunit 3B OS=Homo sapiens OX=9606 GN=EIF2S3B PE=2 SV=2	2	14	14	14	7	10	9	9	10	10	3	2	3	3	4	2	13	11	12	11	10	12	7	10	9	9	10	10	3	2	3	3	4	2	13	11	12	11	10	12	7	10	9	9
sp|P41208|CETN2_HUMAN	sp|P41208|CETN2_HUMAN	2	2	2	sp|P41208|CETN2_HUMAN Centrin-2 OS=Homo sapiens OX=9606 GN=CETN2 PE=1 SV=1	1	2	2	2	1	1	2	1	2	2	1	1	1	0	0	1	1	1	1	1	1	1	1	1	2	1	2	2	1	1	1	0	0	1	1	1	1	1	1	1	1	1	2	1
sp|P41214|EIF2D_HUMAN	sp|P41214|EIF2D_HUMAN	2	2	2	sp|P41214|EIF2D_HUMAN Eukaryotic translation initiation factor 2D OS=Homo sapiens OX=9606 GN=EIF2D PE=1 SV=3	1	2	2	2	0	0	0	0	0	0	0	0	0	0	0	0	1	1	2	1	1	1	0	0	0	0	0	0	0	0	0	0	0	0	1	1	2	1	1	1	0	0	0	0
sp|P41218|MNDA_HUMAN	sp|P41218|MNDA_HUMAN	5	5	5	sp|P41218|MNDA_HUMAN Myeloid cell nuclear differentiation antigen OS=Homo sapiens OX=9606 GN=MNDA PE=1 SV=1	1	5	5	5	2	2	1	2	1	3	1	0	0	1	1	2	2	4	3	4	2	3	2	2	1	2	1	3	1	0	0	1	1	2	2	4	3	4	2	3	2	2	1	2
sp|P41219|PERI_HUMAN	sp|P41219|PERI_HUMAN	5	1	1	sp|P41219|PERI_HUMAN Peripherin OS=Homo sapiens OX=9606 GN=PRPH PE=1 SV=2	1	5	1	1	3	3	4	4	3	3	4	4	4	3	4	4	4	4	4	4	4	3	0	0	0	0	0	0	0	0	0	0	0	1	0	0	0	0	0	0	0	0	0	0
sp|P41221|WNT5A_HUMAN	sp|P41221|WNT5A_HUMAN	1	1	1	sp|P41221|WNT5A_HUMAN Protein Wnt-5a OS=Homo sapiens OX=9606 GN=WNT5A PE=1 SV=2	1	1	1	1	1	1	1	1	1	0	0	0	0	0	0	0	0	0	0	0	0	0	1	1	1	1	1	0	0	0	0	0	0	0	0	0	0	0	0	0	1	1	1	1
sp|P41222|PTGDS_HUMAN	sp|P41222|PTGDS_HUMAN	2	2	2	sp|P41222|PTGDS_HUMAN Prostaglandin-H2 D-isomerase OS=Homo sapiens OX=9606 GN=PTGDS PE=1 SV=1	1	2	2	2	2	1	2	1	1	2	2	2	2	2	2	2	1	1	1	1	0	0	2	1	2	1	1	2	2	2	2	2	2	2	1	1	1	1	0	0	2	1	2	1
sp|P41223|BUD31_HUMAN	sp|P41223|BUD31_HUMAN	1	1	1	sp|P41223|BUD31_HUMAN Protein BUD31 homolog OS=Homo sapiens OX=9606 GN=BUD31 PE=1 SV=2	1	1	1	1	1	1	0	0	0	0	0	0	0	0	0	0	1	1	1	1	1	1	1	1	0	0	0	0	0	0	0	0	0	0	1	1	1	1	1	1	1	1	0	0
sp|P41226|UBA7_HUMAN	sp|P41226|UBA7_HUMAN	5	5	5	sp|P41226|UBA7_HUMAN Ubiquitin-like modifier-activating enzyme 7 OS=Homo sapiens OX=9606 GN=UBA7 PE=1 SV=2	1	5	5	5	0	0	1	0	2	0	0	0	0	0	0	0	1	1	0	1	1	2	0	0	1	0	2	0	0	0	0	0	0	0	1	1	0	1	1	2	0	0	1	0
sp|P41227|NAA10_HUMAN	sp|P41227|NAA10_HUMAN	2	2	2	sp|P41227|NAA10_HUMAN N-alpha-acetyltransferase 10 OS=Homo sapiens OX=9606 GN=NAA10 PE=1 SV=1	1	2	2	2	1	1	1	1	1	1	0	0	0	0	0	0	2	1	1	1	0	0	1	1	1	1	1	1	0	0	0	0	0	0	2	1	1	1	0	0	1	1	1	1
sp|P41240|CSK_HUMAN	sp|P41240|CSK_HUMAN	8	8	8	sp|P41240|CSK_HUMAN Tyrosine-protein kinase CSK OS=Homo sapiens OX=9606 GN=CSK PE=1 SV=1	1	8	8	8	3	2	1	4	3	3	2	1	1	1	1	2	2	4	2	1	4	4	3	2	1	4	3	3	2	1	1	1	1	2	2	4	2	1	4	4	3	2	1	4
sp|P41250|GARS_HUMAN	sp|P41250|GARS_HUMAN	18	18	18	sp|P41250|GARS_HUMAN Glycine--tRNA ligase OS=Homo sapiens OX=9606 GN=GARS1 PE=1 SV=3	1	18	18	18	9	10	8	6	7	9	1	3	3	2	1	4	7	9	9	11	10	7	9	10	8	6	7	9	1	3	3	2	1	4	7	9	9	11	10	7	9	10	8	6
sp|P41252|SYIC_HUMAN	sp|P41252|SYIC_HUMAN	23	23	23	sp|P41252|SYIC_HUMAN Isoleucine--tRNA ligase, cytoplasmic OS=Homo sapiens OX=9606 GN=IARS1 PE=1 SV=2	1	23	23	23	10	10	12	13	8	9	2	4	3	3	1	2	13	11	11	10	13	8	10	10	12	13	8	9	2	4	3	3	1	2	13	11	11	10	13	8	10	10	12	13
sp|P41567|EIF1_HUMAN;sp|O60739|EIF1B_HUMAN	sp|P41567|EIF1_HUMAN	5;2	5;2	5;2	sp|P41567|EIF1_HUMAN Eukaryotic translation initiation factor 1 OS=Homo sapiens OX=9606 GN=EIF1 PE=1 SV=1	2	5	5	5	1	1	2	1	1	0	0	0	0	0	0	0	1	3	2	3	3	2	1	1	2	1	1	0	0	0	0	0	0	0	1	3	2	3	3	2	1	1	2	1
sp|P41743|KPCI_HUMAN	sp|P41743|KPCI_HUMAN	1	1	1	sp|P41743|KPCI_HUMAN Protein kinase C iota type OS=Homo sapiens OX=9606 GN=PRKCI PE=1 SV=2	1	1	1	1	0	0	0	0	0	0	0	0	0	0	0	0	0	1	0	0	0	1	0	0	0	0	0	0	0	0	0	0	0	0	0	1	0	0	0	1	0	0	0	0
sp|P42025|ACTY_HUMAN	sp|P42025|ACTY_HUMAN	7	4	4	sp|P42025|ACTY_HUMAN Beta-centractin OS=Homo sapiens OX=9606 GN=ACTR1B PE=1 SV=1	1	7	4	4	4	2	3	2	3	2	3	3	3	3	4	3	1	3	2	3	3	3	2	1	1	1	1	1	2	2	2	2	3	2	1	1	2	2	1	2	2	1	1	1
sp|P42126|ECI1_HUMAN	sp|P42126|ECI1_HUMAN	5	5	5	sp|P42126|ECI1_HUMAN Enoyl-CoA delta isomerase 1, mitochondrial OS=Homo sapiens OX=9606 GN=ECI1 PE=1 SV=1	1	5	5	5	2	2	2	2	3	3	3	3	3	3	2	2	3	2	3	3	5	5	2	2	2	2	3	3	3	3	3	3	2	2	3	2	3	3	5	5	2	2	2	2
sp|P42166|LAP2A_HUMAN	sp|P42166|LAP2A_HUMAN	10	3	3	sp|P42166|LAP2A_HUMAN Lamina-associated polypeptide 2, isoform alpha OS=Homo sapiens OX=9606 GN=TMPO PE=1 SV=2	1	10	3	3	5	4	4	3	4	2	2	2	2	2	2	3	9	9	8	8	9	8	1	1	1	1	1	0	0	0	0	0	0	1	2	2	1	2	2	1	1	1	1	1
sp|P42167|LAP2B_HUMAN	sp|P42167|LAP2B_HUMAN	11	11	4	sp|P42167|LAP2B_HUMAN Lamina-associated polypeptide 2, isoforms beta/gamma OS=Homo sapiens OX=9606 GN=TMPO PE=1 SV=2	1	11	11	4	4	4	3	3	4	2	2	2	2	2	2	2	8	8	9	7	8	8	4	4	3	3	4	2	2	2	2	2	2	2	8	8	9	7	8	8	0	1	0	1
sp|P42224|STAT1_HUMAN	sp|P42224|STAT1_HUMAN	31	31	31	sp|P42224|STAT1_HUMAN Signal transducer and activator of transcription 1-alpha/beta OS=Homo sapiens OX=9606 GN=STAT1 PE=1 SV=2	1	31	31	31	10	12	8	9	9	12	0	1	3	1	3	1	25	29	25	25	28	24	10	12	8	9	9	12	0	1	3	1	3	1	25	29	25	25	28	24	10	12	8	9
sp|P42226|STAT6_HUMAN	sp|P42226|STAT6_HUMAN	4	4	4	sp|P42226|STAT6_HUMAN Signal transducer and activator of transcription 6 OS=Homo sapiens OX=9606 GN=STAT6 PE=1 SV=1	1	4	4	4	2	1	1	1	1	3	2	3	2	2	2	3	3	3	2	3	2	2	2	1	1	1	1	3	2	3	2	2	2	3	3	3	2	3	2	2	2	1	1	1
sp|P42229|STA5A_HUMAN	sp|P42229|STA5A_HUMAN	4	4	2	sp|P42229|STA5A_HUMAN Signal transducer and activator of transcription 5A OS=Homo sapiens OX=9606 GN=STAT5A PE=1 SV=1	1	4	4	2	0	0	0	0	0	0	1	0	2	2	1	2	1	0	1	1	1	1	0	0	0	0	0	0	1	0	2	2	1	2	1	0	1	1	1	1	0	0	0	0
sp|P42285|MTREX_HUMAN	sp|P42285|MTREX_HUMAN	9	9	9	sp|P42285|MTREX_HUMAN Exosome RNA helicase MTR4 OS=Homo sapiens OX=9606 GN=MTREX PE=1 SV=3	1	9	9	9	1	3	0	2	1	3	0	0	0	0	0	0	2	3	1	1	4	2	1	3	0	2	1	3	0	0	0	0	0	0	2	3	1	1	4	2	1	3	0	2
sp|P42330|AK1C3_HUMAN;sp|P17516|AK1C4_HUMAN	sp|P42330|AK1C3_HUMAN	15;2	15;2	11;0	sp|P42330|AK1C3_HUMAN Aldo-keto reductase family 1 member C3 OS=Homo sapiens OX=9606 GN=AKR1C3 PE=1 SV=4	2	15	15	11	0	0	0	0	0	0	1	1	1	1	1	1	13	13	14	14	14	13	0	0	0	0	0	0	1	1	1	1	1	1	13	13	14	14	14	13	0	0	0	0
sp|P42345|MTOR_HUMAN	sp|P42345|MTOR_HUMAN	4	4	4	sp|P42345|MTOR_HUMAN Serine/threonine-protein kinase mTOR OS=Homo sapiens OX=9606 GN=MTOR PE=1 SV=1	1	4	4	4	0	0	1	1	0	0	0	0	0	0	0	0	1	1	1	1	0	0	0	0	1	1	0	0	0	0	0	0	0	0	1	1	1	1	0	0	0	0	1	1
sp|P42356|PI4KA_HUMAN	sp|P42356|PI4KA_HUMAN	5	5	5	sp|P42356|PI4KA_HUMAN Phosphatidylinositol 4-kinase alpha OS=Homo sapiens OX=9606 GN=PI4KA PE=1 SV=4	1	5	5	5	1	1	1	1	1	2	0	0	0	0	0	1	3	3	1	1	1	2	1	1	1	1	1	2	0	0	0	0	0	1	3	3	1	1	1	2	1	1	1	1
sp|P42566|EPS15_HUMAN	sp|P42566|EPS15_HUMAN	3	3	3	sp|P42566|EPS15_HUMAN Epidermal growth factor receptor substrate 15 OS=Homo sapiens OX=9606 GN=EPS15 PE=1 SV=2	1	3	3	3	1	1	1	1	1	1	1	1	1	1	0	0	1	3	1	1	2	1	1	1	1	1	1	1	1	1	1	1	0	0	1	3	1	1	2	1	1	1	1	1
sp|P42574|CASP3_HUMAN	sp|P42574|CASP3_HUMAN	2	2	2	sp|P42574|CASP3_HUMAN Caspase-3 OS=Homo sapiens OX=9606 GN=CASP3 PE=1 SV=2	1	2	2	2	0	1	0	0	0	0	0	0	0	1	0	0	1	1	0	0	1	2	0	1	0	0	0	0	0	0	0	1	0	0	1	1	0	0	1	2	0	1	0	0
sp|P42677|RS27_HUMAN;sp|Q71UM5|RS27L_HUMAN	sp|P42677|RS27_HUMAN;sp|Q71UM5|RS27L_HUMAN	4;2	4;2	4;2	sp|P42677|RS27_HUMAN 40S ribosomal protein S27 OS=Homo sapiens OX=9606 GN=RPS27 PE=1 SV=3;sp|Q71UM5|RS27L_HUMAN 40S ribosomal protein S27-like OS=Homo sapiens OX=9606 GN=RPS27L PE=1 SV=3	2	4	4	4	2	3	2	2	2	0	1	1	1	1	1	1	0	2	4	3	1	2	2	3	2	2	2	0	1	1	1	1	1	1	0	2	4	3	1	2	2	3	2	2
sp|P42704|LPPRC_HUMAN	sp|P42704|LPPRC_HUMAN	41	41	41	sp|P42704|LPPRC_HUMAN Leucine-rich PPR motif-containing protein, mitochondrial OS=Homo sapiens OX=9606 GN=LRPPRC PE=1 SV=3	1	41	41	41	27	24	28	29	25	26	3	3	5	4	6	4	28	25	22	23	23	23	27	24	28	29	25	26	3	3	5	4	6	4	28	25	22	23	23	23	27	24	28	29
sp|P42765|THIM_HUMAN	sp|P42765|THIM_HUMAN	19	19	19	sp|P42765|THIM_HUMAN 3-ketoacyl-CoA thiolase, mitochondrial OS=Homo sapiens OX=9606 GN=ACAA2 PE=1 SV=2	1	19	19	19	14	17	16	16	16	14	3	3	3	3	4	3	7	6	4	3	6	4	14	17	16	16	16	14	3	3	3	3	4	3	7	6	4	3	6	4	14	17	16	16
sp|P42766|RL35_HUMAN	sp|P42766|RL35_HUMAN	2	2	2	sp|P42766|RL35_HUMAN 60S ribosomal protein L35 OS=Homo sapiens OX=9606 GN=RPL35 PE=1 SV=2	1	2	2	2	0	1	0	0	2	2	2	1	2	2	2	2	1	1	1	1	1	1	0	1	0	0	2	2	2	1	2	2	2	2	1	1	1	1	1	1	0	1	0	0
sp|P42771|CDN2A_HUMAN;sp|P42772|CDN2B_HUMAN	sp|P42771|CDN2A_HUMAN;sp|P42772|CDN2B_HUMAN	3;2	3;2	3;2	sp|P42771|CDN2A_HUMAN Cyclin-dependent kinase inhibitor 2A OS=Homo sapiens OX=9606 GN=CDKN2A PE=1 SV=2;sp|P42772|CDN2B_HUMAN Cyclin-dependent kinase 4 inhibitor B OS=Homo sapiens OX=9606 GN=CDKN2B PE=1 SV=1	2	3	3	3	0	0	0	0	0	0	0	0	0	0	0	0	3	2	3	2	3	1	0	0	0	0	0	0	0	0	0	0	0	0	3	2	3	2	3	1	0	0	0	0
sp|P42785|PCP_HUMAN	sp|P42785|PCP_HUMAN	2	2	2	sp|P42785|PCP_HUMAN Lysosomal Pro-X carboxypeptidase OS=Homo sapiens OX=9606 GN=PRCP PE=1 SV=1	1	2	2	2	1	1	1	1	1	1	2	2	2	0	1	2	1	1	1	2	1	1	1	1	1	1	1	1	2	2	2	0	1	2	1	1	1	2	1	1	1	1	1	1
sp|P42858|HD_HUMAN	sp|P42858|HD_HUMAN	3	3	3	sp|P42858|HD_HUMAN Huntingtin OS=Homo sapiens OX=9606 GN=HTT PE=1 SV=2	1	3	3	3	1	0	1	0	1	0	0	0	0	0	0	0	1	1	1	1	1	1	1	0	1	0	1	0	0	0	0	0	0	0	1	1	1	1	1	1	1	0	1	0
sp|P42892|ECE1_HUMAN	sp|P42892|ECE1_HUMAN	4	4	4	sp|P42892|ECE1_HUMAN Endothelin-converting enzyme 1 OS=Homo sapiens OX=9606 GN=ECE1 PE=1 SV=2	1	4	4	4	2	2	2	2	3	1	0	0	0	0	0	0	0	0	1	0	1	1	2	2	2	2	3	1	0	0	0	0	0	0	0	0	1	0	1	1	2	2	2	2
sp|P43034|LIS1_HUMAN	sp|P43034|LIS1_HUMAN	14	14	14	sp|P43034|LIS1_HUMAN Platelet-activating factor acetylhydrolase IB subunit beta OS=Homo sapiens OX=9606 GN=PAFAH1B1 PE=1 SV=2	1	14	14	14	5	6	6	5	4	5	6	5	7	4	7	5	5	5	5	6	5	5	5	6	6	5	4	5	6	5	7	4	7	5	5	5	5	6	5	5	5	6	6	5
sp|P43121|MUC18_HUMAN	sp|P43121|MUC18_HUMAN	2	2	2	sp|P43121|MUC18_HUMAN Cell surface glycoprotein MUC18 OS=Homo sapiens OX=9606 GN=MCAM PE=1 SV=2	1	2	2	2	1	1	1	1	1	1	2	2	2	2	2	2	1	0	0	0	1	0	1	1	1	1	1	1	2	2	2	2	2	2	1	0	0	0	1	0	1	1	1	1
sp|P43155|CACP_HUMAN	sp|P43155|CACP_HUMAN	7	7	7	sp|P43155|CACP_HUMAN Carnitine O-acetyltransferase OS=Homo sapiens OX=9606 GN=CRAT PE=1 SV=5	1	7	7	7	5	5	3	3	5	6	1	1	0	0	0	0	1	1	1	1	1	1	5	5	3	3	5	6	1	1	0	0	0	0	1	1	1	1	1	1	5	5	3	3
sp|P43243|MATR3_HUMAN	sp|P43243|MATR3_HUMAN	14	14	14	sp|P43243|MATR3_HUMAN Matrin-3 OS=Homo sapiens OX=9606 GN=MATR3 PE=1 SV=2	1	14	14	14	6	6	4	6	5	5	2	3	3	2	3	3	9	10	10	9	9	9	6	6	4	6	5	5	2	3	3	2	3	3	9	10	10	9	9	9	6	6	4	6
sp|P43246|MSH2_HUMAN	sp|P43246|MSH2_HUMAN	7	7	7	sp|P43246|MSH2_HUMAN DNA mismatch repair protein Msh2 OS=Homo sapiens OX=9606 GN=MSH2 PE=1 SV=1	1	7	7	7	3	5	3	3	2	4	0	0	0	0	0	0	4	3	4	4	6	5	3	5	3	3	2	4	0	0	0	0	0	0	4	3	4	4	6	5	3	5	3	3
sp|P43251|BTD_HUMAN	sp|P43251|BTD_HUMAN	3	3	3	sp|P43251|BTD_HUMAN Biotinidase OS=Homo sapiens OX=9606 GN=BTD PE=1 SV=2	1	3	3	3	2	2	2	2	3	1	2	2	1	2	1	1	1	0	0	1	0	0	2	2	2	2	3	1	2	2	1	2	1	1	1	0	0	1	0	0	2	2	2	2
sp|P43304|GPDM_HUMAN	sp|P43304|GPDM_HUMAN	15	15	15	sp|P43304|GPDM_HUMAN Glycerol-3-phosphate dehydrogenase, mitochondrial OS=Homo sapiens OX=9606 GN=GPD2 PE=1 SV=3	1	15	15	15	7	8	10	7	7	6	0	2	0	1	1	1	13	11	8	11	12	14	7	8	10	7	7	6	0	2	0	1	1	1	13	11	8	11	12	14	7	8	10	7
sp|P43307|SSRA_HUMAN	sp|P43307|SSRA_HUMAN	5	5	5	sp|P43307|SSRA_HUMAN Translocon-associated protein subunit alpha OS=Homo sapiens OX=9606 GN=SSR1 PE=1 SV=3	1	5	5	5	2	2	3	3	3	4	1	0	0	1	1	1	3	2	3	3	2	2	2	2	3	3	3	4	1	0	0	1	1	1	3	2	3	3	2	2	2	2	3	3
sp|P43358|MAGA4_HUMAN	sp|P43358|MAGA4_HUMAN	1	1	1	sp|P43358|MAGA4_HUMAN Melanoma-associated antigen 4 OS=Homo sapiens OX=9606 GN=MAGEA4 PE=1 SV=2	1	1	1	1	0	0	0	0	0	0	0	0	0	0	0	0	0	0	1	0	0	0	0	0	0	0	0	0	0	0	0	0	0	0	0	0	1	0	0	0	0	0	0	0
sp|P43403|ZAP70_HUMAN	sp|P43403|ZAP70_HUMAN	7	7	7	sp|P43403|ZAP70_HUMAN Tyrosine-protein kinase ZAP-70 OS=Homo sapiens OX=9606 GN=ZAP70 PE=1 SV=1	1	7	7	7	4	4	6	3	3	5	0	0	0	0	0	0	0	0	1	0	1	0	4	4	6	3	3	5	0	0	0	0	0	0	0	0	1	0	1	0	4	4	6	3
sp|P43405|KSYK_HUMAN	sp|P43405|KSYK_HUMAN	6	6	6	sp|P43405|KSYK_HUMAN Tyrosine-protein kinase SYK OS=Homo sapiens OX=9606 GN=SYK PE=1 SV=1	1	6	6	6	3	4	2	3	3	4	0	0	0	0	0	0	2	1	1	2	2	1	3	4	2	3	3	4	0	0	0	0	0	0	2	1	1	2	2	1	3	4	2	3
sp|P43487|RANG_HUMAN;sp|Q9C010|IPKB_HUMAN	sp|P43487|RANG_HUMAN	6;1	6;1	6;1	sp|P43487|RANG_HUMAN Ran-specific GTPase-activating protein OS=Homo sapiens OX=9606 GN=RANBP1 PE=1 SV=1	2	6	6	6	2	1	0	1	1	1	0	0	0	0	0	0	4	2	4	4	3	4	2	1	0	1	1	1	0	0	0	0	0	0	4	2	4	4	3	4	2	1	0	1
sp|P43490|NAMPT_HUMAN	sp|P43490|NAMPT_HUMAN	16	16	16	sp|P43490|NAMPT_HUMAN Nicotinamide phosphoribosyltransferase OS=Homo sapiens OX=9606 GN=NAMPT PE=1 SV=1	1	16	16	16	10	12	10	12	10	10	5	4	4	5	3	4	11	11	10	10	12	10	10	12	10	12	10	10	5	4	4	5	3	4	11	11	10	10	12	10	10	12	10	12
sp|P43652|AFAM_HUMAN;CON__REFSEQ:XP_585019	sp|P43652|AFAM_HUMAN	15;1	15;1	15;1	sp|P43652|AFAM_HUMAN Afamin OS=Homo sapiens OX=9606 GN=AFM PE=1 SV=1	2	15	15	15	4	7	6	6	6	5	8	6	8	7	5	8	4	2	4	4	4	4	4	7	6	6	6	5	8	6	8	7	5	8	4	2	4	4	4	4	4	7	6	6
sp|P43686|PRS6B_HUMAN	sp|P43686|PRS6B_HUMAN	18	18	18	sp|P43686|PRS6B_HUMAN 26S proteasome regulatory subunit 6B OS=Homo sapiens OX=9606 GN=PSMC4 PE=1 SV=2	1	18	18	18	11	12	14	11	11	7	3	4	4	4	5	4	10	10	9	9	10	10	11	12	14	11	11	7	3	4	4	4	5	4	10	10	9	9	10	10	11	12	14	11
sp|P45877|PPIC_HUMAN	sp|P45877|PPIC_HUMAN	4	4	4	sp|P45877|PPIC_HUMAN Peptidyl-prolyl cis-trans isomerase C OS=Homo sapiens OX=9606 GN=PPIC PE=1 SV=1	1	4	4	4	3	3	3	3	3	3	1	1	1	1	1	1	3	2	2	3	3	3	3	3	3	3	3	3	1	1	1	1	1	1	3	2	2	3	3	3	3	3	3	3
sp|P45880|VDAC2_HUMAN	sp|P45880|VDAC2_HUMAN	13	13	13	sp|P45880|VDAC2_HUMAN Voltage-dependent anion-selective channel protein 2 OS=Homo sapiens OX=9606 GN=VDAC2 PE=1 SV=2	1	13	13	13	11	10	11	10	10	11	7	7	7	5	6	5	11	11	11	12	11	12	11	10	11	10	10	11	7	7	7	5	6	5	11	11	11	12	11	12	11	10	11	10
sp|P45954|ACDSB_HUMAN	sp|P45954|ACDSB_HUMAN	2	2	2	sp|P45954|ACDSB_HUMAN Short/branched chain specific acyl-CoA dehydrogenase, mitochondrial OS=Homo sapiens OX=9606 GN=ACADSB PE=1 SV=1	1	2	2	2	0	0	0	0	0	0	1	1	1	0	1	0	1	2	1	0	0	1	0	0	0	0	0	0	1	1	1	0	1	0	1	2	1	0	0	1	0	0	0	0
sp|P45973|CBX5_HUMAN	sp|P45973|CBX5_HUMAN	6	5	5	sp|P45973|CBX5_HUMAN Chromobox protein homolog 5 OS=Homo sapiens OX=9606 GN=CBX5 PE=1 SV=1	1	6	5	5	4	3	4	4	5	4	2	2	2	2	2	2	3	2	2	2	3	2	3	2	3	3	4	3	2	2	2	2	2	2	2	2	2	2	3	2	3	2	3	3
sp|P45974|UBP5_HUMAN	sp|P45974|UBP5_HUMAN	20	20	20	sp|P45974|UBP5_HUMAN Ubiquitin carboxyl-terminal hydrolase 5 OS=Homo sapiens OX=9606 GN=USP5 PE=1 SV=2	1	20	20	20	11	14	14	14	15	13	6	6	5	7	6	4	12	8	10	9	12	11	11	14	14	14	15	13	6	6	5	7	6	4	12	8	10	9	12	11	11	14	14	14
sp|P45984|MK09_HUMAN;sp|P53779|MK10_HUMAN	sp|P45984|MK09_HUMAN;sp|P53779|MK10_HUMAN	1;1	1;1	1;1	sp|P45984|MK09_HUMAN Mitogen-activated protein kinase 9 OS=Homo sapiens OX=9606 GN=MAPK9 PE=1 SV=2;sp|P53779|MK10_HUMAN Mitogen-activated protein kinase 10 OS=Homo sapiens OX=9606 GN=MAPK10 PE=1 SV=2	2	1	1	1	0	0	0	1	0	0	1	0	0	0	0	1	0	0	1	0	0	0	0	0	0	1	0	0	1	0	0	0	0	1	0	0	1	0	0	0	0	0	0	1
sp|P45985|MP2K4_HUMAN	sp|P45985|MP2K4_HUMAN	2	2	2	sp|P45985|MP2K4_HUMAN Dual specificity mitogen-activated protein kinase kinase 4 OS=Homo sapiens OX=9606 GN=MAP2K4 PE=1 SV=1	1	2	2	2	2	2	2	2	2	2	0	0	0	0	0	0	1	1	1	1	1	1	2	2	2	2	2	2	0	0	0	0	0	0	1	1	1	1	1	1	2	2	2	2
sp|P46060|RAGP1_HUMAN	sp|P46060|RAGP1_HUMAN	10	10	10	sp|P46060|RAGP1_HUMAN Ran GTPase-activating protein 1 OS=Homo sapiens OX=9606 GN=RANGAP1 PE=1 SV=1	1	10	10	10	0	1	0	0	0	0	2	0	1	2	1	3	5	5	4	4	6	5	0	1	0	0	0	0	2	0	1	2	1	3	5	5	4	4	6	5	0	1	0	0
sp|P46063|RECQ1_HUMAN	sp|P46063|RECQ1_HUMAN	14	14	14	sp|P46063|RECQ1_HUMAN ATP-dependent DNA helicase Q1 OS=Homo sapiens OX=9606 GN=RECQL PE=1 SV=3	1	14	14	14	6	5	4	5	4	4	3	3	4	3	3	4	7	7	10	6	9	7	6	5	4	5	4	4	3	3	4	3	3	4	7	7	10	6	9	7	6	5	4	5
sp|P46087|NOP2_HUMAN	sp|P46087|NOP2_HUMAN	3	3	3	sp|P46087|NOP2_HUMAN Probable 28S rRNA (cytosine(4447)-C(5))-methyltransferase OS=Homo sapiens OX=9606 GN=NOP2 PE=1 SV=2	1	3	3	3	1	0	0	0	1	1	0	0	0	0	0	0	2	0	2	1	2	3	1	0	0	0	1	1	0	0	0	0	0	0	2	0	2	1	2	3	1	0	0	0
sp|P46093|GPR4_HUMAN	sp|P46093|GPR4_HUMAN	1	1	1	sp|P46093|GPR4_HUMAN G-protein coupled receptor 4 OS=Homo sapiens OX=9606 GN=GPR4 PE=1 SV=2	1	1	1	1	1	1	1	1	1	1	1	1	1	1	1	1	0	0	0	0	0	0	1	1	1	1	1	1	1	1	1	1	1	1	0	0	0	0	0	0	1	1	1	1
sp|P46108|CRK_HUMAN	sp|P46108|CRK_HUMAN	11	11	11	sp|P46108|CRK_HUMAN Adapter molecule crk OS=Homo sapiens OX=9606 GN=CRK PE=1 SV=2	1	11	11	11	6	4	5	3	5	5	4	5	4	2	5	4	3	4	4	4	2	5	6	4	5	3	5	5	4	5	4	2	5	4	3	4	4	4	2	5	6	4	5	3
sp|P46109|CRKL_HUMAN	sp|P46109|CRKL_HUMAN	7	7	7	sp|P46109|CRKL_HUMAN Crk-like protein OS=Homo sapiens OX=9606 GN=CRKL PE=1 SV=1	1	7	7	7	1	2	1	1	2	1	2	1	1	1	2	1	5	3	4	5	3	6	1	2	1	1	2	1	2	1	1	1	2	1	5	3	4	5	3	6	1	2	1	1
sp|P46379|BAG6_HUMAN	sp|P46379|BAG6_HUMAN	7	7	7	sp|P46379|BAG6_HUMAN Large proline-rich protein BAG6 OS=Homo sapiens OX=9606 GN=BAG6 PE=1 SV=2	1	7	7	7	3	2	3	2	3	3	0	0	0	0	0	0	4	2	3	1	2	4	3	2	3	2	3	3	0	0	0	0	0	0	4	2	3	1	2	4	3	2	3	2
sp|P46459|NSF_HUMAN	sp|P46459|NSF_HUMAN	15	15	15	sp|P46459|NSF_HUMAN Vesicle-fusing ATPase OS=Homo sapiens OX=9606 GN=NSF PE=1 SV=3	1	15	15	15	6	5	6	6	7	9	2	1	1	3	4	4	9	7	8	10	6	9	6	5	6	6	7	9	2	1	1	3	4	4	9	7	8	10	6	9	6	5	6	6
sp|P46734|MP2K3_HUMAN	sp|P46734|MP2K3_HUMAN	3	3	2	sp|P46734|MP2K3_HUMAN Dual specificity mitogen-activated protein kinase kinase 3 OS=Homo sapiens OX=9606 GN=MAP2K3 PE=1 SV=2	1	3	3	2	1	1	1	1	1	1	1	0	0	0	1	0	0	0	0	0	0	0	1	1	1	1	1	1	1	0	0	0	1	0	0	0	0	0	0	0	0	0	0	0
sp|P46736|BRCC3_HUMAN	sp|P46736|BRCC3_HUMAN	1	1	1	sp|P46736|BRCC3_HUMAN Lys-63-specific deubiquitinase BRCC36 OS=Homo sapiens OX=9606 GN=BRCC3 PE=1 SV=2	1	1	1	1	1	1	1	1	1	1	1	1	0	1	1	1	0	0	0	0	0	0	1	1	1	1	1	1	1	1	0	1	1	1	0	0	0	0	0	0	1	1	1	1
sp|P46776|RL27A_HUMAN	sp|P46776|RL27A_HUMAN	3	3	3	sp|P46776|RL27A_HUMAN 60S ribosomal protein L27a OS=Homo sapiens OX=9606 GN=RPL27A PE=1 SV=2	1	3	3	3	2	2	2	3	2	2	1	1	1	1	1	1	3	3	3	2	3	3	2	2	2	3	2	2	1	1	1	1	1	1	3	3	3	2	3	3	2	2	2	3
sp|P46777|RL5_HUMAN	sp|P46777|RL5_HUMAN	8	8	8	sp|P46777|RL5_HUMAN 60S ribosomal protein L5 OS=Homo sapiens OX=9606 GN=RPL5 PE=1 SV=3	1	8	8	8	4	4	5	2	5	3	3	3	3	4	3	4	3	2	2	2	2	2	4	4	5	2	5	3	3	3	3	4	3	4	3	2	2	2	2	2	4	4	5	2
sp|P46778|RL21_HUMAN	sp|P46778|RL21_HUMAN	3	3	3	sp|P46778|RL21_HUMAN 60S ribosomal protein L21 OS=Homo sapiens OX=9606 GN=RPL21 PE=1 SV=2	1	3	3	3	0	0	0	0	0	0	2	2	2	2	2	2	1	1	1	1	1	1	0	0	0	0	0	0	2	2	2	2	2	2	1	1	1	1	1	1	0	0	0	0
sp|P46779|RL28_HUMAN	sp|P46779|RL28_HUMAN	5	5	5	sp|P46779|RL28_HUMAN 60S ribosomal protein L28 OS=Homo sapiens OX=9606 GN=RPL28 PE=1 SV=3	1	5	5	5	2	2	2	2	2	2	2	1	1	2	1	2	2	2	2	3	3	3	2	2	2	2	2	2	2	1	1	2	1	2	2	2	2	3	3	3	2	2	2	2
sp|P46781|RS9_HUMAN	sp|P46781|RS9_HUMAN	6	6	6	sp|P46781|RS9_HUMAN 40S ribosomal protein S9 OS=Homo sapiens OX=9606 GN=RPS9 PE=1 SV=3	1	6	6	6	2	1	2	1	2	1	5	5	5	5	4	6	2	2	3	2	2	1	2	1	2	1	2	1	5	5	5	5	4	6	2	2	3	2	2	1	2	1	2	1
sp|P46782|RS5_HUMAN	sp|P46782|RS5_HUMAN	6	6	6	sp|P46782|RS5_HUMAN 40S ribosomal protein S5 OS=Homo sapiens OX=9606 GN=RPS5 PE=1 SV=4	1	6	6	6	5	4	3	3	3	3	4	3	2	2	2	4	2	3	2	3	2	3	5	4	3	3	3	3	4	3	2	2	2	4	2	3	2	3	2	3	5	4	3	3
sp|P46783|RS10_HUMAN;sp|Q9NQ39|RS10L_HUMAN	sp|P46783|RS10_HUMAN	7;3	7;3	7;3	sp|P46783|RS10_HUMAN 40S ribosomal protein S10 OS=Homo sapiens OX=9606 GN=RPS10 PE=1 SV=1	2	7	7	7	5	5	4	5	5	5	4	3	4	4	3	4	4	6	5	6	6	5	5	5	4	5	5	5	4	3	4	4	3	4	4	6	5	6	6	5	5	5	4	5
sp|P46821|MAP1B_HUMAN;sp|P78559|MAP1A_HUMAN	sp|P46821|MAP1B_HUMAN	32;1	32;1	32;1	sp|P46821|MAP1B_HUMAN Microtubule-associated protein 1B OS=Homo sapiens OX=9606 GN=MAP1B PE=1 SV=2	2	32	32	32	26	25	23	23	26	25	6	6	5	5	4	5	0	0	1	0	0	1	26	25	23	23	26	25	6	6	5	5	4	5	0	0	1	0	0	1	26	25	23	23
sp|P46926|GNPI1_HUMAN	sp|P46926|GNPI1_HUMAN	9	9	6	sp|P46926|GNPI1_HUMAN Glucosamine-6-phosphate isomerase 1 OS=Homo sapiens OX=9606 GN=GNPDA1 PE=1 SV=1	1	9	9	6	6	3	4	3	5	3	3	5	4	5	5	3	2	3	3	2	4	5	6	3	4	3	5	3	3	5	4	5	5	3	2	3	3	2	4	5	3	0	2	1
sp|P46934|NEDD4_HUMAN	sp|P46934|NEDD4_HUMAN	2	2	2	sp|P46934|NEDD4_HUMAN E3 ubiquitin-protein ligase NEDD4 OS=Homo sapiens OX=9606 GN=NEDD4 PE=1 SV=4	1	2	2	2	0	0	0	0	0	0	0	0	0	0	0	0	2	1	1	1	1	1	0	0	0	0	0	0	0	0	0	0	0	0	2	1	1	1	1	1	0	0	0	0
sp|P46937|YAP1_HUMAN	sp|P46937|YAP1_HUMAN	2	2	2	sp|P46937|YAP1_HUMAN Transcriptional coactivator YAP1 OS=Homo sapiens OX=9606 GN=YAP1 PE=1 SV=2	1	2	2	2	0	0	0	0	0	0	1	1	0	1	0	0	0	0	0	0	0	0	0	0	0	0	0	0	1	1	0	1	0	0	0	0	0	0	0	0	0	0	0	0
sp|P46939|UTRN_HUMAN	sp|P46939|UTRN_HUMAN	8	8	8	sp|P46939|UTRN_HUMAN Utrophin OS=Homo sapiens OX=9606 GN=UTRN PE=1 SV=2	1	8	8	8	2	1	2	4	2	1	1	0	0	0	0	1	1	2	1	1	2	1	2	1	2	4	2	1	1	0	0	0	0	1	1	2	1	1	2	1	2	1	2	4
sp|P46940|IQGA1_HUMAN;sp|Q86VI3|IQGA3_HUMAN	sp|P46940|IQGA1_HUMAN	70;2	70;2	69;1	sp|P46940|IQGA1_HUMAN Ras GTPase-activating-like protein IQGAP1 OS=Homo sapiens OX=9606 GN=IQGAP1 PE=1 SV=1	2	70	70	69	37	35	37	39	35	33	30	31	31	35	31	27	44	40	45	45	43	46	37	35	37	39	35	33	30	31	31	35	31	27	44	40	45	45	43	46	37	35	37	39
sp|P46952|3HAO_HUMAN	sp|P46952|3HAO_HUMAN	3	3	3	sp|P46952|3HAO_HUMAN 3-hydroxyanthranilate 3,4-dioxygenase OS=Homo sapiens OX=9606 GN=HAAO PE=1 SV=2	1	3	3	3	0	0	0	0	0	0	1	1	1	2	2	2	0	0	0	0	0	0	0	0	0	0	0	0	1	1	1	2	2	2	0	0	0	0	0	0	0	0	0	0
sp|P46976|GLYG_HUMAN	sp|P46976|GLYG_HUMAN	4	4	4	sp|P46976|GLYG_HUMAN Glycogenin-1 OS=Homo sapiens OX=9606 GN=GYG1 PE=1 SV=4	1	4	4	4	3	3	3	2	3	3	2	2	0	1	1	2	2	1	2	2	2	2	3	3	3	2	3	3	2	2	0	1	1	2	2	1	2	2	2	2	3	3	3	2
sp|P46977|STT3A_HUMAN	sp|P46977|STT3A_HUMAN	9	9	9	sp|P46977|STT3A_HUMAN Dolichyl-diphosphooligosaccharide--protein glycosyltransferase subunit STT3A OS=Homo sapiens OX=9606 GN=STT3A PE=1 SV=2	1	9	9	9	4	5	4	4	4	3	0	0	1	1	0	0	1	4	3	4	1	5	4	5	4	4	4	3	0	0	1	1	0	0	1	4	3	4	1	5	4	5	4	4
sp|P47755|CAZA2_HUMAN	sp|P47755|CAZA2_HUMAN	11	9	9	sp|P47755|CAZA2_HUMAN F-actin-capping protein subunit alpha-2 OS=Homo sapiens OX=9606 GN=CAPZA2 PE=1 SV=3	1	11	9	9	8	7	9	7	7	6	6	7	6	7	7	7	8	8	8	6	9	7	7	6	8	6	6	5	4	5	4	5	5	5	7	7	6	5	7	6	7	6	8	6
sp|P47756|CAPZB_HUMAN	sp|P47756|CAPZB_HUMAN	14	14	14	sp|P47756|CAPZB_HUMAN F-actin-capping protein subunit beta OS=Homo sapiens OX=9606 GN=CAPZB PE=1 SV=4	1	14	14	14	7	8	8	10	10	9	10	7	8	8	7	9	10	10	10	10	9	10	7	8	8	10	10	9	10	7	8	8	7	9	10	10	10	10	9	10	7	8	8	10
sp|P47813|IF1AX_HUMAN;sp|O14602|IF1AY_HUMAN	sp|P47813|IF1AX_HUMAN;sp|O14602|IF1AY_HUMAN	5;4	5;4	5;4	sp|P47813|IF1AX_HUMAN Eukaryotic translation initiation factor 1A, X-chromosomal OS=Homo sapiens OX=9606 GN=EIF1AX PE=1 SV=2;sp|O14602|IF1AY_HUMAN Eukaryotic translation initiation factor 1A, Y-chromosomal OS=Homo sapiens OX=9606 GN=EIF1AY PE=1 SV=4	2	5	5	5	2	2	2	2	2	3	2	1	1	1	1	1	3	3	4	4	2	2	2	2	2	2	2	3	2	1	1	1	1	1	3	3	4	4	2	2	2	2	2	2
sp|P47895|AL1A3_HUMAN	sp|P47895|AL1A3_HUMAN	6	3	3	sp|P47895|AL1A3_HUMAN Aldehyde dehydrogenase family 1 member A3 OS=Homo sapiens OX=9606 GN=ALDH1A3 PE=1 SV=2	1	6	3	3	1	1	1	1	1	1	2	3	2	1	2	3	1	1	2	1	2	2	0	0	0	0	0	0	0	0	0	0	0	0	1	1	2	1	1	2	0	0	0	0
sp|P47897|SYQ_HUMAN	sp|P47897|SYQ_HUMAN	19	19	19	sp|P47897|SYQ_HUMAN Glutamine--tRNA ligase OS=Homo sapiens OX=9606 GN=QARS1 PE=1 SV=1	1	19	19	19	6	6	7	7	10	10	3	3	2	2	2	2	6	6	8	6	7	9	6	6	7	7	10	10	3	3	2	2	2	2	6	6	8	6	7	9	6	6	7	7
sp|P47914|RL29_HUMAN	sp|P47914|RL29_HUMAN	1	1	1	sp|P47914|RL29_HUMAN 60S ribosomal protein L29 OS=Homo sapiens OX=9606 GN=RPL29 PE=1 SV=2	1	1	1	1	0	0	0	0	0	0	0	0	0	1	0	0	0	1	0	1	1	1	0	0	0	0	0	0	0	0	0	1	0	0	0	1	0	1	1	1	0	0	0	0
sp|P47929|LEG7_HUMAN	sp|P47929|LEG7_HUMAN	10	10	10	sp|P47929|LEG7_HUMAN Galectin-7 OS=Homo sapiens OX=9606 GN=LGALS7 PE=1 SV=2	1	10	10	10	8	8	8	7	8	7	9	8	9	9	9	9	8	8	9	8	9	9	8	8	8	7	8	7	9	8	9	9	9	9	8	8	9	8	9	9	8	8	8	7
sp|P47944|MT4_HUMAN	sp|P47944|MT4_HUMAN	1	1	1	sp|P47944|MT4_HUMAN Metallothionein-4 OS=Homo sapiens OX=9606 GN=MT4 PE=3 SV=2	1	1	1	1	1	1	1	0	1	0	0	0	0	0	0	0	0	0	0	0	0	0	1	1	1	0	1	0	0	0	0	0	0	0	0	0	0	0	0	0	1	1	1	0
sp|P47985|UCRI_HUMAN;sp|P0C7P4|UCRIL_HUMAN	sp|P47985|UCRI_HUMAN;sp|P0C7P4|UCRIL_HUMAN	8;6	8;6	8;6	sp|P47985|UCRI_HUMAN Cytochrome b-c1 complex subunit Rieske, mitochondrial OS=Homo sapiens OX=9606 GN=UQCRFS1 PE=1 SV=2;sp|P0C7P4|UCRIL_HUMAN Putative cytochrome b-c1 complex subunit Rieske-like protein 1 OS=Homo sapiens OX=9606 GN=UQCRFS1P1 PE=5 SV=1	2	8	8	8	5	4	5	4	5	4	3	4	2	3	2	3	4	4	4	4	5	3	5	4	5	4	5	4	3	4	2	3	2	3	4	4	4	4	5	3	5	4	5	4
sp|P48047|ATPO_HUMAN	sp|P48047|ATPO_HUMAN	7	7	7	sp|P48047|ATPO_HUMAN ATP synthase subunit O, mitochondrial OS=Homo sapiens OX=9606 GN=ATP5PO PE=1 SV=1	1	7	7	7	5	5	5	5	6	6	6	7	6	5	6	5	4	4	5	4	4	4	5	5	5	5	6	6	6	7	6	5	6	5	4	4	5	4	4	4	5	5	5	5
sp|P48059|LIMS1_HUMAN	sp|P48059|LIMS1_HUMAN	8	8	5	sp|P48059|LIMS1_HUMAN LIM and senescent cell antigen-like-containing domain protein 1 OS=Homo sapiens OX=9606 GN=LIMS1 PE=1 SV=4	1	8	8	5	5	6	5	4	5	4	4	5	4	3	5	3	7	7	4	7	5	8	5	6	5	4	5	4	4	5	4	3	5	3	7	7	4	7	5	8	2	3	2	3
sp|P48147|PPCE_HUMAN	sp|P48147|PPCE_HUMAN	23	23	23	sp|P48147|PPCE_HUMAN Prolyl endopeptidase OS=Homo sapiens OX=9606 GN=PREP PE=1 SV=2	1	23	23	23	13	13	9	10	13	15	4	3	1	3	5	5	13	14	13	12	13	14	13	13	9	10	13	15	4	3	1	3	5	5	13	14	13	12	13	14	13	13	9	10
sp|P48163|MAOX_HUMAN;sp|Q16798|MAON_HUMAN	sp|P48163|MAOX_HUMAN	10;1	10;1	10;1	sp|P48163|MAOX_HUMAN NADP-dependent malic enzyme OS=Homo sapiens OX=9606 GN=ME1 PE=1 SV=1	2	10	10	10	0	0	0	0	0	0	0	0	0	0	0	0	7	7	5	4	7	7	0	0	0	0	0	0	0	0	0	0	0	0	7	7	5	4	7	7	0	0	0	0
sp|P48426|PI42A_HUMAN	sp|P48426|PI42A_HUMAN	5	5	3	sp|P48426|PI42A_HUMAN Phosphatidylinositol 5-phosphate 4-kinase type-2 alpha OS=Homo sapiens OX=9606 GN=PIP4K2A PE=1 SV=2	1	5	5	3	2	1	2	2	3	2	1	1	1	1	1	1	2	1	2	0	1	2	2	1	2	2	3	2	1	1	1	1	1	1	2	1	2	0	1	2	1	1	1	0
sp|P48444|COPD_HUMAN	sp|P48444|COPD_HUMAN	15	15	15	sp|P48444|COPD_HUMAN Coatomer subunit delta OS=Homo sapiens OX=9606 GN=ARCN1 PE=1 SV=1	1	15	15	15	13	11	9	10	10	12	3	3	2	3	4	4	8	8	11	8	10	10	13	11	9	10	10	12	3	3	2	3	4	4	8	8	11	8	10	10	13	11	9	10
sp|P48449|LSS_HUMAN	sp|P48449|LSS_HUMAN	8	8	8	sp|P48449|LSS_HUMAN Lanosterol synthase OS=Homo sapiens OX=9606 GN=LSS PE=1 SV=1	1	8	8	8	0	0	0	0	0	0	1	0	1	0	1	1	5	4	2	5	5	4	0	0	0	0	0	0	1	0	1	0	1	1	5	4	2	5	5	4	0	0	0	0
sp|P48506|GSH1_HUMAN	sp|P48506|GSH1_HUMAN	8	8	8	sp|P48506|GSH1_HUMAN Glutamate--cysteine ligase catalytic subunit OS=Homo sapiens OX=9606 GN=GCLC PE=1 SV=2	1	8	8	8	2	3	2	2	2	2	1	1	2	1	1	3	5	7	5	5	6	6	2	3	2	2	2	2	1	1	2	1	1	3	5	7	5	5	6	6	2	3	2	2
sp|P48507|GSH0_HUMAN	sp|P48507|GSH0_HUMAN	2	2	2	sp|P48507|GSH0_HUMAN Glutamate--cysteine ligase regulatory subunit OS=Homo sapiens OX=9606 GN=GCLM PE=1 SV=1	1	2	2	2	1	0	0	0	0	0	0	0	0	0	0	0	2	2	2	2	2	2	1	0	0	0	0	0	0	0	0	0	0	0	2	2	2	2	2	2	1	0	0	0
sp|P48539|PCP4_HUMAN	sp|P48539|PCP4_HUMAN	3	3	3	sp|P48539|PCP4_HUMAN Calmodulin regulator protein PCP4 OS=Homo sapiens OX=9606 GN=PCP4 PE=1 SV=3	1	3	3	3	2	1	2	2	0	1	0	0	0	0	1	0	0	0	0	0	0	0	2	1	2	2	0	1	0	0	0	0	1	0	0	0	0	0	0	0	2	1	2	2
sp|P48556|PSMD8_HUMAN	sp|P48556|PSMD8_HUMAN	5	5	5	sp|P48556|PSMD8_HUMAN 26S proteasome non-ATPase regulatory subunit 8 OS=Homo sapiens OX=9606 GN=PSMD8 PE=1 SV=2	1	5	5	5	3	1	3	2	3	3	1	0	0	0	0	0	3	1	2	2	1	2	3	1	3	2	3	3	1	0	0	0	0	0	3	1	2	2	1	2	3	1	3	2
sp|P48594|SPB4_HUMAN	sp|P48594|SPB4_HUMAN	26	11	11	sp|P48594|SPB4_HUMAN Serpin B4 OS=Homo sapiens OX=9606 GN=SERPINB4 PE=1 SV=2	1	26	11	11	3	3	2	3	4	5	18	17	16	18	17	14	22	23	23	23	23	23	1	0	0	0	1	0	5	5	4	5	5	3	10	9	9	9	10	9	1	0	0	0
sp|P48637|GSHB_HUMAN	sp|P48637|GSHB_HUMAN	6	6	6	sp|P48637|GSHB_HUMAN Glutathione synthetase OS=Homo sapiens OX=9606 GN=GSS PE=1 SV=1	1	6	6	6	3	3	1	1	4	3	3	3	4	1	3	2	4	3	5	3	4	3	3	3	1	1	4	3	3	3	4	1	3	2	4	3	5	3	4	3	3	3	1	1
sp|P48643|TCPE_HUMAN	sp|P48643|TCPE_HUMAN	32	32	32	sp|P48643|TCPE_HUMAN T-complex protein 1 subunit epsilon OS=Homo sapiens OX=9606 GN=CCT5 PE=1 SV=1	1	32	32	32	17	18	20	19	18	19	14	12	14	14	12	12	22	21	24	21	21	22	17	18	20	19	18	19	14	12	14	14	12	12	22	21	24	21	21	22	17	18	20	19
sp|P48668|K2C6C_HUMAN;CON__P48668	sp|P48668|K2C6C_HUMAN;CON__P48668	50;50	2;2	2;2	sp|P48668|K2C6C_HUMAN Keratin, type II cytoskeletal 6C OS=Homo sapiens OX=9606 GN=KRT6C PE=1 SV=3;	2	50	2	2	30	32	30	29	28	29	36	42	43	38	43	40	47	47	46	46	46	47	0	0	0	0	0	0	1	1	1	1	1	1	2	2	2	2	2	2	0	0	0	0
sp|P48681|NEST_HUMAN	sp|P48681|NEST_HUMAN	8	8	8	sp|P48681|NEST_HUMAN Nestin OS=Homo sapiens OX=9606 GN=NES PE=1 SV=2	1	8	8	8	1	1	1	0	1	2	0	0	0	1	0	0	2	1	3	0	3	1	1	1	1	0	1	2	0	0	0	1	0	0	2	1	3	0	3	1	1	1	1	0
sp|P48729|KC1A_HUMAN;sp|Q8N752|KC1AL_HUMAN	sp|P48729|KC1A_HUMAN;sp|Q8N752|KC1AL_HUMAN	7;4	7;4	7;4	sp|P48729|KC1A_HUMAN Casein kinase I isoform alpha OS=Homo sapiens OX=9606 GN=CSNK1A1 PE=1 SV=2;sp|Q8N752|KC1AL_HUMAN Casein kinase I isoform alpha-like OS=Homo sapiens OX=9606 GN=CSNK1A1L PE=2 SV=2	2	7	7	7	1	1	2	1	1	1	1	1	1	1	1	1	7	5	5	5	6	5	1	1	2	1	1	1	1	1	1	1	1	1	7	5	5	5	6	5	1	1	2	1
sp|P48735|IDHP_HUMAN	sp|P48735|IDHP_HUMAN	20	20	19	sp|P48735|IDHP_HUMAN Isocitrate dehydrogenase [NADP], mitochondrial OS=Homo sapiens OX=9606 GN=IDH2 PE=1 SV=2	1	20	20	19	17	18	18	17	18	17	8	7	7	8	8	9	16	16	16	14	17	16	17	18	18	17	18	17	8	7	7	8	8	9	16	16	16	14	17	16	16	17	17	16
sp|P48739|PIPNB_HUMAN	sp|P48739|PIPNB_HUMAN	6	6	6	sp|P48739|PIPNB_HUMAN Phosphatidylinositol transfer protein beta isoform OS=Homo sapiens OX=9606 GN=PITPNB PE=1 SV=2	1	6	6	6	2	2	2	2	2	2	1	1	1	1	2	1	5	4	2	3	4	3	2	2	2	2	2	2	1	1	1	1	2	1	5	4	2	3	4	3	2	2	2	2
sp|P48960|AGRE5_HUMAN	sp|P48960|AGRE5_HUMAN	2	2	2	sp|P48960|AGRE5_HUMAN Adhesion G protein-coupled receptor E5 OS=Homo sapiens OX=9606 GN=ADGRE5 PE=1 SV=4	1	2	2	2	0	1	0	1	1	0	1	0	0	1	0	1	1	0	0	0	0	0	0	1	0	1	1	0	1	0	0	1	0	1	1	0	0	0	0	0	0	1	0	1
sp|P49006|MRP_HUMAN	sp|P49006|MRP_HUMAN	1	1	1	sp|P49006|MRP_HUMAN MARCKS-related protein OS=Homo sapiens OX=9606 GN=MARCKSL1 PE=1 SV=2	1	1	1	1	1	1	1	1	1	0	0	0	0	0	0	0	0	0	0	0	0	0	1	1	1	1	1	0	0	0	0	0	0	0	0	0	0	0	0	0	1	1	1	1
sp|P49023|PAXI_HUMAN	sp|P49023|PAXI_HUMAN	2	2	2	sp|P49023|PAXI_HUMAN Paxillin OS=Homo sapiens OX=9606 GN=PXN PE=1 SV=3	1	2	2	2	2	1	2	1	1	1	1	1	1	1	1	2	2	1	2	1	2	1	2	1	2	1	1	1	1	1	1	1	1	2	2	1	2	1	2	1	2	1	2	1
sp|P49184|DNSL1_HUMAN	sp|P49184|DNSL1_HUMAN	1	1	1	sp|P49184|DNSL1_HUMAN Deoxyribonuclease-1-like 1 OS=Homo sapiens OX=9606 GN=DNASE1L1 PE=1 SV=1	1	1	1	1	1	1	1	0	1	1	0	0	0	0	0	0	0	0	0	0	0	0	1	1	1	0	1	1	0	0	0	0	0	0	0	0	0	0	0	0	1	1	1	0
sp|P49189|AL9A1_HUMAN	sp|P49189|AL9A1_HUMAN	16	16	16	sp|P49189|AL9A1_HUMAN 4-trimethylaminobutyraldehyde dehydrogenase OS=Homo sapiens OX=9606 GN=ALDH9A1 PE=1 SV=3	1	16	16	16	8	9	5	7	4	7	10	10	12	10	9	10	7	5	8	6	6	5	8	9	5	7	4	7	10	10	12	10	9	10	7	5	8	6	6	5	8	9	5	7
sp|P49207|RL34_HUMAN	sp|P49207|RL34_HUMAN	1	1	1	sp|P49207|RL34_HUMAN 60S ribosomal protein L34 OS=Homo sapiens OX=9606 GN=RPL34 PE=1 SV=3	1	1	1	1	1	0	1	0	1	0	0	0	0	0	0	0	0	0	1	1	1	1	1	0	1	0	1	0	0	0	0	0	0	0	0	0	1	1	1	1	1	0	1	0
sp|P49247|RPIA_HUMAN	sp|P49247|RPIA_HUMAN	3	3	3	sp|P49247|RPIA_HUMAN Ribose-5-phosphate isomerase OS=Homo sapiens OX=9606 GN=RPIA PE=1 SV=3	1	3	3	3	2	2	2	3	3	2	0	0	0	0	0	0	1	1	1	0	1	1	2	2	2	3	3	2	0	0	0	0	0	0	1	1	1	0	1	1	2	2	2	3
sp|P49257|LMAN1_HUMAN	sp|P49257|LMAN1_HUMAN	15	15	15	sp|P49257|LMAN1_HUMAN Protein ERGIC-53 OS=Homo sapiens OX=9606 GN=LMAN1 PE=1 SV=2	1	15	15	15	13	11	12	13	13	11	2	1	0	1	1	2	10	8	10	11	11	11	13	11	12	13	13	11	2	1	0	1	1	2	10	8	10	11	11	11	13	11	12	13
sp|P49281|NRAM2_HUMAN	sp|P49281|NRAM2_HUMAN	1	1	1	sp|P49281|NRAM2_HUMAN Natural resistance-associated macrophage protein 2 OS=Homo sapiens OX=9606 GN=SLC11A2 PE=1 SV=2	1	1	1	1	1	1	1	1	0	0	0	0	0	0	0	0	0	0	0	0	0	0	1	1	1	1	0	0	0	0	0	0	0	0	0	0	0	0	0	0	1	1	1	1
sp|P49321|NASP_HUMAN	sp|P49321|NASP_HUMAN	13	13	13	sp|P49321|NASP_HUMAN Nuclear autoantigenic sperm protein OS=Homo sapiens OX=9606 GN=NASP PE=1 SV=2	1	13	13	13	5	3	3	6	3	4	3	1	4	1	3	1	8	9	9	10	9	10	5	3	3	6	3	4	3	1	4	1	3	1	8	9	9	10	9	10	5	3	3	6
sp|P49327|FAS_HUMAN	sp|P49327|FAS_HUMAN	61	61	61	sp|P49327|FAS_HUMAN Fatty acid synthase OS=Homo sapiens OX=9606 GN=FASN PE=1 SV=3	1	61	61	61	35	36	29	35	35	39	14	13	13	11	17	16	29	37	35	39	34	30	35	36	29	35	35	39	14	13	13	11	17	16	29	37	35	39	34	30	35	36	29	35
sp|P49354|FNTA_HUMAN	sp|P49354|FNTA_HUMAN	7	7	7	sp|P49354|FNTA_HUMAN Protein farnesyltransferase/geranylgeranyltransferase type-1 subunit alpha OS=Homo sapiens OX=9606 GN=FNTA PE=1 SV=1	1	7	7	7	2	3	4	4	3	3	2	1	0	2	2	1	3	2	5	4	2	1	2	3	4	4	3	3	2	1	0	2	2	1	3	2	5	4	2	1	2	3	4	4
sp|P49368|TCPG_HUMAN	sp|P49368|TCPG_HUMAN	26	26	26	sp|P49368|TCPG_HUMAN T-complex protein 1 subunit gamma OS=Homo sapiens OX=9606 GN=CCT3 PE=1 SV=4	1	26	26	26	18	14	14	16	15	16	12	10	10	11	13	11	18	18	18	22	19	14	18	14	14	16	15	16	12	10	10	11	13	11	18	18	18	22	19	14	18	14	14	16
sp|P49406|RM19_HUMAN	sp|P49406|RM19_HUMAN	2	2	2	sp|P49406|RM19_HUMAN 39S ribosomal protein L19, mitochondrial OS=Homo sapiens OX=9606 GN=MRPL19 PE=1 SV=2	1	2	2	2	0	0	0	0	0	1	0	0	0	0	0	0	0	0	0	1	0	0	0	0	0	0	0	1	0	0	0	0	0	0	0	0	0	1	0	0	0	0	0	0
sp|P49411|EFTU_HUMAN	sp|P49411|EFTU_HUMAN	22	22	22	sp|P49411|EFTU_HUMAN Elongation factor Tu, mitochondrial OS=Homo sapiens OX=9606 GN=TUFM PE=1 SV=2	1	22	22	22	17	17	15	12	14	14	9	7	11	10	10	10	18	19	19	19	19	16	17	17	15	12	14	14	9	7	11	10	10	10	18	19	19	19	19	16	17	17	15	12
[truncated: 2,491 more rows]
[truncated: 129 more columns]

## Sheet: Annotation
Protein IDs	Entry name	Status	Protein names	Gene names	Organism	Length	Mass	Gene ontology (biological process)	Gene ontology (cellular component)	Gene ontology (molecular function)	Subcellular location [CC]	Motif	Protein families
[truncated: 4,043 more rows]
