# Supplementary material for: RCN1 couple KIF14 and promotes the malignant progression of cervical cancer via the PI3K-mTOR pathway
Source: Research Square preprint supplement (doi:10.21203/rs.3.rs-6303169/v1), 2025-05-05
Supplement: Supplementary file 3 [file 5db4726ca4d68816a9c95974.xlsx]

## Sheet: T-tests_IgG_vs_C33A
Accession	Gene Names (primary)	Fold_Change C33A_C-IgG	-Log Student's T-test p-value C33A_C-IgG	p value	Student's T-test q-value C33A_C-IgG	Student's T-test Difference C33A_C-IgG	Student's T-test Significant C33A_C-IgG	Student's T-test significant	Student's T-test Test statistic C33A_C-IgG	FDR<0.05, S0=0.1, Significant	Gene Names (synonym)	Description	Exp. q-value: Combined	Sum PEP Score	Coverage [%]	# Peptides	# PSMs	# Unique Peptides	# AAs	MW [kDa]	calc. pI	Score CHIMERYS Identification: CHIMERYS Identification	# Peptides (by Search Engine): CHIMERYS Identification	# Razor Peptides	Abundance: C33A_1	Abundance: C33A_2	Abundance: C33A_3	Abundance: C93_1	Abundance: C93_2	Abundance: C93_3	Abundance: C-IgG_1	Abundance: C-IgG_2	Abundance: C-IgG_3
P35579	MYH9	1.23027	0.229983	0.588867	0.794904	0.298977			0.586786			Myosin-9 OS=Homo sapiens OX=9606 GN=MYH9 PE=1 SV=4	0	1858.92	75	232	23677	200	1960	226.4	5.6	10458.8	232	33	12.7754	12.2813	12.1333	12.9939	12.6022	13.1395	12.78	11.1938	12.3193
P35580	MYH10	1.25519	0.393043	0.404535	0.635655	0.327905			0.931043			Myosin-10 OS=Homo sapiens OX=9606 GN=MYH10 PE=1 SV=3	0	800.407	63	141	6158	107	1976	228.9	5.54	2653.49	141	10	7.54031	7.19774	6.99805	7.45575	7.21273	7.48982	7.33838	6.302	7.112
Q14204	DYNC1H1	0.932819	0.386261	0.410903	0.641504	-0.100331			-0.91727		DHC1 DNCH1 DNCL DNECL DYHC KIAA0325	Cytoplasmic dynein 1 heavy chain 1 OS=Homo sapiens OX=9606 GN=DYNC1H1 PE=1 SV=5	0	482.193	31	114	1842	114	4646	532.1	6.4	791.41	114	0	5.45726	5.38582	5.41482	5.60598	5.73981	5.80783	5.66956	5.31147	5.57787
O00159	MYO1C	1.16665	0.310758	0.488925	0.70762	0.222366			0.761232			Unconventional myosin-Ic OS=Homo sapiens OX=9606 GN=MYO1C PE=1 SV=4	0	398.208	62	68	2526	67	1063	121.6	9.41	1131.7	68	0	8.0643	7.89635	7.77755	7.74478	7.81646	7.79659	8.05186	7.13918	7.88006
O43795	MYO1B	1.17961	0.287108	0.516288	0.731373	0.238305			0.711105			Unconventional myosin-Ib OS=Homo sapiens OX=9606 GN=MYO1B PE=1 SV=3	0	335.129	53	65	3046	64	1136	131.9	9.38	1504.51	65	1	8.2725	8.03218	7.96784	7.99709	7.8704	8.10876	8.2727	7.21969	8.06522
P78527	PRKDC	1.06568	0.272689	0.533717	0.744032	0.0917714			0.680188		HYRC HYRC1	DNA-dependent protein kinase catalytic subunit OS=Homo sapiens OX=9606 GN=PRKDC PE=1 SV=3	0	328.234	24	79	1384	79	4128	468.8	7.12	643.68	79	0	5.29947	5.1356	5.21891	5.28397	5.18138	5.33296	5.3165	4.88706	5.17511
Q00610	CLTC	1.34799	0.651873	0.222909	0.421397	0.430814			1.44143		CLH17 CLTCL2 KIAA0034	Clathrin heavy chain 1 OS=Homo sapiens OX=9606 GN=CLTC PE=1 SV=5	0	323.881	47	65	1285	65	1675	191.5	5.69	550.19	65	0	6.22459	6.02488	5.93093	6.34434	6.34999	6.43784	5.80711	5.06948	6.01137
P53621	COPA	0.98514	0.0349024	0.922779	0.962513	-0.0215998			-0.10319			Coatomer subunit alpha OS=Homo sapiens OX=9606 GN=COPA PE=1 SV=2	0	321.257	52	63	2091	63	1224	138.3	7.66	967.2	63	0	6.7493	6.65895	6.63455	7.03972	6.89342	7.13912	7.03178	6.3223	6.75352
Q92616	GCN1	1.14647	0.691319	0.203555	0.395502	0.197202			1.51829		GCN1L1 KIAA0219	Stalled ribosome sensor GCN1 OS=Homo sapiens OX=9606 GN=GCN1 PE=1 SV=7	0	315.567	34	74	1146	74	2671	292.5	7.43	472.93	74	0	4.29768	4.40103	4.19035	4.7893	4.80292	4.84652	4.22844	3.87026	4.19876
Q9UM54	MYO6	1.24954	0.297464	0.504123	0.720353	0.321395			0.73314		KIAA0389	Unconventional myosin-VI OS=Homo sapiens OX=9606 GN=MYO6 PE=1 SV=4	0	275.056	45	57	1624	57	1294	149.6	8.53	785.69	57	0	6.69181	6.39876	6.33163	6.41737	6.31522	6.63754	6.68866	5.31513	6.45422
Q14980	NUMA1	1.28698	0.787188	0.163235	0.338839	0.363995			1.70584		NMP22 NUMA	Nuclear mitotic apparatus protein 1 OS=Homo sapiens OX=9606 GN=NUMA1 PE=1 SV=2	0	274.45	33	63	928	63	2115	238.1	5.78	384.13	63	0	4.64234	4.46942	4.5232	4.82968	4.60959	4.83742	4.51785	3.80361	4.22152
P60709	ACTB	0.941481	0.0813712	0.829142	0.922678	-0.0869954			-0.230321			Actin, cytoplasmic 1 OS=Homo sapiens OX=9606 GN=ACTB PE=1 SV=1	0	255.414	70	28	3674	9	375	41.7	5.48	1826.02	28	25	10.7973	10.5809	10.5383	11.1985	10.849	11.3368	11.2774	10.0252	10.8748
P63261	ACTG1	0.941481	0.0813712	0.829142	0.922349	-0.0869954			-0.230321		ACTG	Actin, cytoplasmic 2 OS=Homo sapiens OX=9606 GN=ACTG1 PE=1 SV=1	0	255.414	70	28	3674	9	375	41.8	5.48	1826.02	28	0	10.7973	10.5809	10.5383	11.1985	10.849	11.3368	11.2774	10.0252	10.8748
Q5JSZ5	PRRC2B	0.703309	1.24921	0.0563369	0.16886	-0.50777			-2.66091		BAT2L BAT2L1 KIAA0515	Protein PRRC2B OS=Homo sapiens OX=9606 GN=PRRC2B PE=1 SV=2	0	249.557	31	52	794	51	2229	242.8	8.34	315.2	52	1	4.27761	4.03559	4.47937	3.54997	3.44013	3.68837	4.90503	4.92128	4.48957
P49327	FASN	1.20077	0.537721	0.28992	0.512944	0.263961			1.21869		FAS	Fatty acid synthase OS=Homo sapiens OX=9606 GN=FASN PE=1 SV=3	0	246.239	28	51	1127	51	2511	273.3	6.44	507.64	51	0	5.44787	5.67211	5.24556	5.44336	5.35031	5.50375	5.35504	4.83529	5.38333
Q92614	MYO18A	0.605828	2.5902	0.00256919	0.0780526	-0.723019			-6.70896	+	CD245 KIAA0216 MYSPDZ TIAF1	Unconventional myosin-XVIIIa OS=Homo sapiens OX=9606 GN=MYO18A PE=1 SV=3	0	245.951	32	55	892	55	2054	233	6.3	355.48	55	0	4.02349	4.24687	4.36439	4.42345	4.50488	4.77624	4.88944	4.89952	5.01485
Q14517	FAT1	0.718485	1.84611	0.0142524	0.105181	-0.476969			-4.15068		CDHF7 FAT	Protocadherin Fat 1 OS=Homo sapiens OX=9606 GN=FAT1 PE=1 SV=2	0	245.258	16	59	805	58	4588	506	5	293.98	59	1	3.80827	3.67587	3.94084	4.15559	4.25906	4.46372	4.4568	4.20161	4.19748
O94832	MYO1D	1.15426	0.279999	0.524809	0.736753	0.20697			0.695898		KIAA0727	Unconventional myosin-Id OS=Homo sapiens OX=9606 GN=MYO1D PE=1 SV=2	0	244.397	49	51	1483	51	1006	116.1	9.39	703.59	51	0	6.34657	6.11916	6.06485	5.79742	5.73623	5.95375	6.33974	5.41021	6.1597
O95071	UBR5	5.16398	3.12371	0.000752129	0.079125	2.36848			9.2732	+	EDD EDD1 HYD KIAA0896	E3 ubiquitin-protein ligase UBR5 OS=Homo sapiens OX=9606 GN=UBR5 PE=1 SV=2	0	243.571	26	56	869	56	2799	309.2	5.85	360.06	56	0	4.60581	4.63355	4.99512	4.76846	4.58511	4.61734	2.67028	1.94002	2.51873
Q9Y5S2	CDC42BPB	1.20638	0.605466	0.248047	0.454101	0.270682			1.35104		KIAA1124	Serine/threonine-protein kinase MRCK beta OS=Homo sapiens OX=9606 GN=CDC42BPB PE=1 SV=2	0	228.535	32	50	1022	44	1711	194.2	6.37	446.32	50	5	4.90071	4.77671	4.72232	4.96872	4.85776	4.90233	4.76874	4.14672	4.67224
Q15149	PLEC	0.709606	0.484336	0.327841	0.562012	-0.494911			-1.11363		PLEC1	Plectin OS=Homo sapiens OX=9606 GN=PLEC PE=1 SV=3	0	228.172	17	66	606	63	4684	531.5	5.96	201.88	66	0	2.19464	3.13371	2.15668	2.25607	2.25053	3.0269	3.58722	2.82774	2.55481
Q12965	MYO1E	1.12558	0.153955	0.701528	0.862948	0.170672			0.411902		MYO1C	Unconventional myosin-Ie OS=Homo sapiens OX=9606 GN=MYO1E PE=1 SV=2	0	223.949	44	46	1593	45	1108	127	8.92	774.48	46	0	6.79213	6.45361	6.45767	6.82273	6.67787	7.01552	6.91958	5.6138	6.65801
P07900	HSP90AA1	0.972126	0.0922992	0.808539	0.908506	-0.0407844			-0.258832		HSP90A HSPC1 HSPCA	Heat shock protein HSP 90-alpha OS=Homo sapiens OX=9606 GN=HSP90AA1 PE=1 SV=5	0	223.466	54	45	1588	30	732	84.6	5.02	714.49	45	13	6.27483	6.61877	6.37377	6.50222	6.34841	6.68128	6.61961	6.22759	6.54252
Q13045	FLII	1.48106	0.673172	0.21224	0.407722	0.566631			1.48292		FLIL	Protein flightless-1 homolog OS=Homo sapiens OX=9606 GN=FLII PE=1 SV=2	0	220.229	46	45	1072	45	1269	144.7	6.05	455.05	45	0	5.33308	5.24052	4.82986	5.20025	5.26724	5.36885	5.0004	3.87624	4.82693
Q63HN8	RNF213	1.04953	0.0689881	0.853124	0.934117	0.0697461			0.197422		ALO17 C17orf27 KIAA1554 KIAA1618 MYSTR	E3 ubiquitin-protein ligase RNF213 OS=Homo sapiens OX=9606 GN=RNF213 PE=1 SV=3	0	214.743	14	55	524	55	5207	591	6.48	147.23	55	0	1.96319	1.49226	1.81679	2.31214	2.09929	2.20355	1.99055	1.03869	2.03376
Q9NZM1	MYOF	1.11064	0.401402	0.396824	0.628896	0.151389			0.94797		FER1L3 KIAA1207	Myoferlin OS=Homo sapiens OX=9606 GN=MYOF PE=1 SV=1	0	212.291	29	50	892	50	2061	234.6	6.18	432.45	50	0	4.32616	4.23189	4.11572	4.45801	4.5469	4.59171	4.28363	3.78857	4.14739
O15027	SEC16A	0.642377	1.6813	0.0208306	0.107613	-0.638507			-3.70027		KIAA0310 SEC16 SEC16L	Protein transport protein Sec16A OS=Homo sapiens OX=9606 GN=SEC16A PE=1 SV=4	0	211.987	28	47	716	47	2357	251.7	5.8	300.29	47	0	4.38889	4.20423	4.54856	3.88046	3.6739	3.9086	5.00166	5.27151	4.78404
Q9Y4I1	MYO5A	1.23232	0.402402	0.395911	0.627878	0.301382			0.949991		MYH12	Unconventional myosin-Va OS=Homo sapiens OX=9606 GN=MYO5A PE=1 SV=2	0	203.27	28	47	980	43	1855	215.3	8.48	441.62	47	3	4.85184	4.64069	4.5344	4.60849	4.62444	4.78225	4.75206	3.77453	4.59619
Q07157	TJP1	0.803084	0.831672	0.147343	0.314225	-0.316377			-1.79354		ZO1	Tight junction protein ZO-1 OS=Homo sapiens OX=9606 GN=TJP1 PE=1 SV=3	0	201.78	32	42	778	42	1748	195.3	6.7	346.75	42	0	4.66537	4.47903	4.93719	3.51025	3.31626	3.80581	5.01793	5.20694	4.80584
O00571	DDX3X	0.752532	1.88435	0.0130512	0.100773	-0.410175			-4.26023		DBX DDX3	ATP-dependent RNA helicase DDX3X OS=Homo sapiens OX=9606 GN=DDX3X PE=1 SV=3	0	201.724	53	35	1850	34	662	73.2	7.18	909.05	35	1	7.34684	7.15409	7.41703	7.16383	7.1074	7.34975	7.79116	7.74976	7.60757
P07437	TUBB	0.685698	2.66293	0.00217303	0.0755077	-0.544355			-7.01637	+	TUBB5	Tubulin beta chain OS=Homo sapiens OX=9606 GN=TUBB PE=1 SV=2	0	201.513	64	24	2936	5	444	49.6	4.89	1272.31	24	24	9.0475	8.81026	8.94136	9.13749	8.9231	9.20362	9.54756	9.45787	9.42676
P35908	KRT2	0.842979	0.171401	0.673906	0.848092	-0.246432			-0.453192		KRT2A KRT2E	Keratin, type II cytoskeletal 2 epidermal OS=Homo sapiens OX=9606 GN=KRT2 PE=1 SV=2	0	199.255	67	40	686	31	639	65.4	8	307.77	40	7	5.24843	4.29371	5.83034	2.62532	3.1579	3.27453	4.93435	5.96612	5.2113
P04264	KRT1	0.816566	0.274096	0.531991	0.742897	-0.292359			-0.683216		KRTA	Keratin, type II cytoskeletal 1 OS=Homo sapiens OX=9606 GN=KRT1 PE=1 SV=6	0	187.832	44	35	762	30	644	66	8.12	355.55	35	2	5.85026	5.44609	6.51948	1.54871	2.99033	3.34558	5.90309	6.81302	5.97681
P68371	TUBB4B	0.737184	2.97666	0.00105522	0.0821053	-0.439903			-8.49021	+	TUBB2C	Tubulin beta-4B chain OS=Homo sapiens OX=9606 GN=TUBB4B PE=1 SV=1	0	187.624	58	22	2969	1	445	49.8	4.89	1357.25	22	2	7.24815	7.22018	7.25968	7.06891	7.01447	7.20514	7.76676	7.68869	7.59226
O75643	SNRNP200	1.17748	1.0476	0.089618	0.218976	0.235701			2.22993		ASCC3L1 BRR2 HELIC2 KIAA0788	U5 small nuclear ribonucleoprotein 200 kDa helicase OS=Homo sapiens OX=9606 GN=SNRNP200 PE=1 SV=2	0	186.513	26	45	721	45	2136	244.4	6.06	321.02	45	0	3.86787	3.77808	3.87139	3.96908	4.00146	3.87394	3.69074	3.40164	3.71787
Q14152	EIF3A	1.45177	1.58521	0.0259893	0.11438	0.53781			3.45274		EIF3S10 KIAA0139	Eukaryotic translation initiation factor 3 subunit A OS=Homo sapiens OX=9606 GN=EIF3A PE=1 SV=1	0	185.772	30	47	900	47	1382	166.5	6.79	418.14	47	0	4.95936	4.73135	5.15101	5.37378	5.25781	5.21196	4.48602	4.52686	4.21542
P67936	TPM4	1.22939	0.271314	0.53541	0.744967	0.297939			0.677223			Tropomyosin alpha-4 chain OS=Homo sapiens OX=9606 GN=TPM4 PE=1 SV=3	0	180.549	83	32	1691	18	248	28.5	4.69	830.7	32	13	7.65404	7.30354	7.2223	7.92032	7.71794	8.06167	7.64321	6.27107	7.37179
P68133	ACTA1	1.58363	0.482065	0.32956	0.565236	0.663236			1.10914		ACTA	Actin, alpha skeletal muscle OS=Homo sapiens OX=9606 GN=ACTA1 PE=1 SV=1	0	180.494	52	23	2477	7	377	42	5.39	1262.62	23	0	-3.2898	-2.50989	-3.29516	-1.65927	-1.2743	-1.05775	-3.40191	-4.7381	-2.94456
O75165	DNAJC13	1.32971	1.95602	0.0110658	0.106265	0.411107			4.47105		KIAA0678 RME8	DnaJ homolog subfamily C member 13 OS=Homo sapiens OX=9606 GN=DNAJC13 PE=1 SV=5	0	179.404	23	43	529	43	2243	254.3	6.74	194.67	43	0	3.43902	3.24189	3.30426	3.38169	3.12997	3.39521	2.93528	2.78594	3.03063
P68032	ACTC1	1.23279	0.38047	0.416418	0.647477	0.301925			0.905484		ACTC	Actin, alpha cardiac muscle 1 OS=Homo sapiens OX=9606 GN=ACTC1 PE=1 SV=1	0	178.337	46	22	2474	6	377	42	5.39	1261.97	22	0	-3.2898	-2.50989	-3.29516	-1.65927	-1.2743	-1.05775	-3.40191	-3.65417	-2.94456
Q13885	TUBB2A	0.670336	1.27618	0.0529442	0.16457	-0.577044			-2.72078		TUBB2	Tubulin beta-2A chain OS=Homo sapiens OX=9606 GN=TUBB2A PE=1 SV=1	0	176.749	56	21	1909	1	445	49.9	4.89	827.32	21	2	1.10026	1.54136	1.57408	2.18648	2.28682	2.13375	1.79283	2.27194	1.88207
Q9BVA1	TUBB2B	0.677856	1.76257	0.0172753	0.104946	-0.560949			-3.9181			Tubulin beta-2B chain OS=Homo sapiens OX=9606 GN=TUBB2B PE=1 SV=1	0	176.697	56	21	1958	1	445	49.9	4.89	848.23	21	0	2.03703	1.71228	2.08202	1.65638	1.68018	1.83112	2.63071	2.536	2.34746
Q9P2E9	RRBP1	1.03923	0.113082	0.770757	0.890445	0.0555154			0.311816		KIAA1398	Ribosome-binding protein 1 OS=Homo sapiens OX=9606 GN=RRBP1 PE=1 SV=5	0	173.643	32	36	624	35	1410	152.4	8.6	283.47	36	1	4.82886	4.71216	4.74662	4.57773	4.19163	4.48695	4.95042	4.36838	4.80228
P08238	HSP90AB1	0.963666	0.227551	0.592174	0.798215	-0.0533948			-0.581376		HSP90B HSPC2 HSPCB	Heat shock protein HSP 90-beta OS=Homo sapiens OX=9606 GN=HSP90AB1 PE=1 SV=4	0	173.64	39	35	1482	10	724	83.2	5.03	699.99	35	9	5.37811	5.49328	5.35691	5.5413	5.58321	5.75994	5.61281	5.33263	5.44304
Q08211	DHX9	1.02125	0.185409	0.652516	0.83933	0.0303388			0.485807		DDX9 LKP NDH2	ATP-dependent RNA helicase A OS=Homo sapiens OX=9606 GN=DHX9 PE=1 SV=4	0	171.15	33	36	1129	36	1270	140.9	6.84	538.51	36	0	5.79953	5.73297	5.84331	5.61775	5.43264	5.55788	5.86846	5.70122	5.71512
Q5T4S7	UBR4	1.11059	0.307947	0.4921	0.709657	0.15133			0.75531		KIAA0462 KIAA1307 RBAF600 ZUBR1	E3 ubiquitin-protein ligase UBR4 OS=Homo sapiens OX=9606 GN=UBR4 PE=1 SV=1	0	170.502	11	43	492	43	5183	573.5	6.04	166.76	43	0	2.43546	2.9051	2.65106	2.73878	2.82738	2.84467	2.58699	2.22832	2.72231
P27708	CAD	0.888578	2.22328	0.0059802	0.0903546	-0.17043			-5.32628			Multifunctional protein CAD OS=Homo sapiens OX=9606 GN=CAD PE=1 SV=3	0	169.403	23	37	514	37	2225	242.8	6.46	214.53	37	0	3.04882	3.06239	3.1125	3.45827	3.30275	3.43538	3.28595	3.25076	3.19828
P11142	HSPA8	0.975017	0.0726515	0.845957	0.928854	-0.0365012			-0.207223		HSC70 HSP73 HSPA10	Heat shock cognate 71 kDa protein OS=Homo sapiens OX=9606 GN=HSPA8 PE=1 SV=1	0	169.273	54	32	1243	27	646	70.9	5.52	514.22	32	3	6.79308	6.73187	6.64607	6.7959	6.68481	7.00914	7.04827	6.45682	6.77543
P49750	YLPM1	0.530604	2.1448	0.00716478	0.0895663	-0.914291			-5.06313	+	C14orf170 ZAP3	YLP motif-containing protein 1 OS=Homo sapiens OX=9606 GN=YLPM1 PE=1 SV=4	0	169.164	19	37	745	37	2146	241.5	6.55	369.35	37	0	3.62794	3.47034	3.89337	3.82734	3.83086	4.14254	4.54113	4.82272	4.37067
Q13509	TUBB3	0.900605	1.30263	0.0498158	0.161191	-0.151033			-2.78005		TUBB4	Tubulin beta-3 chain OS=Homo sapiens OX=9606 GN=TUBB3 PE=1 SV=2	0	168.869	59	22	1912	7	450	50.4	4.93	848.27	22	1	5.07152	5.02374	4.91962	5.80298	5.72576	5.75322	5.13918	5.21549	5.11332
P46940	IQGAP1	0.869106	0.73569	0.183785	0.370805	-0.202396			-1.6049		KIAA0051	Ras GTPase-activating-like protein IQGAP1 OS=Homo sapiens OX=9606 GN=IQGAP1 PE=1 SV=1	0	168.571	32	39	587	37	1657	189.1	6.48	271.34	39	2	4.06817	4.06916	4.27153	3.51712	3.62715	3.32945	4.55132	4.24145	4.22328
Q6P2Q9	PRPF8	0.93429	0.286834	0.516613	0.731713	-0.0980573			-0.710521		PRPC8	Pre-mRNA-processing-splicing factor 8 OS=Homo sapiens OX=9606 GN=PRPF8 PE=1 SV=2	0	168.316	22	48	587	48	2335	273.4	8.84	254.16	48	0	3.89118	3.76105	4.11737	3.71843	3.80913	3.96727	3.85326	4.16409	4.04641
Q8N3C0	ASCC3	1.37306	1.00035	0.0999205	0.23502	0.457392			2.13255		HELIC1 RQT2	Activating signal cointegrator 1 complex subunit 3 OS=Homo sapiens OX=9606 GN=ASCC3 PE=1 SV=3	0	168.135	24	38	539	38	2202	251.3	7.09	199.89	38	0	2.72803	2.89962	3.02742	2.62624	2.59485	2.67203	2.46904	2.06907	2.7448
P62736	ACTA2	1.22287	0.370433	0.426154	0.659631	0.290277			0.884992		ACTSA ACTVS	Actin, aortic smooth muscle OS=Homo sapiens OX=9606 GN=ACTA2 PE=1 SV=1	0	167.272	43	21	2218	6	377	42	5.39	1170.36	21	0	-3.2898	-2.50989	-3.29516	-1.65927	-1.2743	-1.05775	-3.40191	-3.61922	-2.94456
P36578	RPL4	1.20997	0.420099	0.380103	0.61107	0.274971			0.985658		RPL1	Large ribosomal subunit protein uL4 OS=Homo sapiens OX=9606 GN=RPL4 PE=1 SV=5	0	166.118	50	27	1567	27	427	47.7	11.06	670.99	27	0	7.92263	7.63745	7.62934	7.61471	7.31679	7.41127	7.87187	6.97221	7.52043
Q14683	SMC1A	1.03171	0.135538	0.731917	0.876871	0.0450319			0.367424		DXS423E KIAA0178 SB1.8 SMC1 SMC1L1	Structural maintenance of chromosomes protein 1A OS=Homo sapiens OX=9606 GN=SMC1A PE=1 SV=2	0	164.769	31	40	711	40	1233	143.1	7.64	324.58	40	0	4.19081	4.11041	4.19851	3.9094	3.75108	4.16167	4.33194	3.91897	4.11374
P07951	TPM2	1.3375	0.375815	0.420905	0.654473	0.419535			0.895991		TMSB	Tropomyosin beta chain OS=Homo sapiens OX=9606 GN=TPM2 PE=1 SV=1	0	164.495	65	28	1355	12	284	32.8	4.7	664.16	28	4	4.40379	4.00404	3.81221	4.94061	4.61764	4.73817	4.25308	2.80892	3.89943
Q9NTJ3	SMC4	0.947413	0.37513	0.42157	0.655311	-0.0779349			-0.894591		CAPC SMC4L1	Structural maintenance of chromosomes protein 4 OS=Homo sapiens OX=9606 GN=SMC4 PE=1 SV=2	0	164.056	26	37	517	37	1288	147.1	6.79	241.77	37	0	4.16818	4.07797	4.168	3.65039	3.61994	3.63406	4.34253	4.06298	4.24245
P04350	TUBB4A	1.1666	0.496843	0.318535	0.553488	0.22231			1.13833		TUBB4 TUBB5	Tubulin beta-4A chain OS=Homo sapiens OX=9606 GN=TUBB4A PE=1 SV=2	0	160.783	53	20	2373	1	444	49.6	4.88	1008.44	20	2	2.00236	2.05765	1.74804	2.43771	2.2156	2.5647	2.04449	1.47694	1.61969
P06396	GSN	1.25868	0.351342	0.445306	0.672669	0.331908			0.845775			Gelsolin OS=Homo sapiens OX=9606 GN=GSN PE=1 SV=1	0	160.51	39	25	902	25	782	85.6	6.28	406.62	25	0	6.11959	5.64496	5.53814	6.98171	6.62403	6.86762	5.93155	4.76136	5.61405
Q9UPQ0	LIMCH1	0.828926	1.05613	0.0878765	0.216755	-0.270684			-2.24762		KIAA1102	LIM and calponin homology domains-containing protein 1 OS=Homo sapiens OX=9606 GN=LIMCH1 PE=1 SV=4	0	159.048	37	36	684	36	1083	121.8	6.47	301.62	36	0	3.9588	4.30412	4.03284	3.44389	3.49733	3.69627	4.43331	4.42317	4.25134
O43852	CALU	0.557411	2.70069	0.00199211	0.0747541	-0.843187			-7.18073	+		Calumenin OS=Homo sapiens OX=9606 GN=CALU PE=1 SV=2	0	158.756	71	20	1514	20	315	37.1	4.64	693.2	20	0	6.88097	6.92048	6.73393	7.15725	7.01698	6.94653	7.64683	7.88344	7.53467
Q7L2E3	DHX30	0.9936	0.0418056	0.908227	0.957523	-0.00926352			-0.122748		DDX30 KIAA0890	ATP-dependent RNA helicase DHX30 OS=Homo sapiens OX=9606 GN=DHX30 PE=1 SV=1	0	158.049	32	31	749	31	1194	133.9	8.78	370.67	31	0	4.74663	4.68944	4.69884	4.40282	4.23629	4.54087	4.86367	4.67882	4.62021
Q13813	SPTAN1	1.11005	0.115589	0.766321	0.88962	0.150627			0.318105		NEAS SPTA2	Spectrin alpha chain, non-erythrocytic 1 OS=Homo sapiens OX=9606 GN=SPTAN1 PE=1 SV=3	0	155.728	20	41	289	41	2472	284.4	5.35	94.78	41	0	1.30881	2.87817	1.96447	0.687083	1.27932	1.35744	1.67094	1.90443	2.12419
P11717	IGF2R	1.28893	0.712437	0.193893	0.384704	0.366171			1.55948		MPRI	Cation-independent mannose-6-phosphate receptor OS=Homo sapiens OX=9606 GN=IGF2R PE=1 SV=3	0	153.446	20	36	426	36	2491	274.2	5.94	162.65	36	0	2.48728	2.54518	2.36725	3.1825	3.07267	3.11414	2.47103	1.68242	2.14775
P13645	KRT10	0.830363	0.196167	0.636551	0.828911	-0.268185			-0.510551		KPP	Keratin, type I cytoskeletal 10 OS=Homo sapiens OX=9606 GN=KRT10 PE=1 SV=6	0	152.778	41	28	839	24	584	58.8	5.21	419.85	28	4	6.25229	5.60012	7.05769	1.8777	3.74962	3.91101	6.05299	7.13582	6.52585
O15523	DDX3Y	0.738929	1.75101	0.0177414	0.106671	-0.436492			-3.88662		DBY	ATP-dependent RNA helicase DDX3Y OS=Homo sapiens OX=9606 GN=DDX3Y PE=1 SV=2	0	152.778	39	25	1226	24	660	73.1	7.55	622.61	25	0	6.84234	6.6681	6.95462	6.71497	6.60404	6.88183	7.39223	7.25047	7.13183
P23458	JAK1	1.20198	0.312834	0.486594	0.707096	0.265409			0.765599		JAK1A JAK1B	Tyrosine-protein kinase JAK1 OS=Homo sapiens OX=9606 GN=JAK1 PE=1 SV=2	0	152.657	35	35	636	33	1154	133.2	7.55	270.17	35	2	4.10938	3.80459	3.72203	4.16247	4.13738	4.27155	4.07363	2.98313	3.78302
Q00839	HNRNPU	0.865316	0.721573	0.189857	0.378013	-0.208702			-1.57732		C1orf199 HNRPU SAFA U21.1	Heterogeneous nuclear ribonucleoprotein U OS=Homo sapiens OX=9606 GN=HNRNPU PE=1 SV=6	0	151.419	37	28	703	28	825	90.5	6	343.05	28	0	5.85885	5.46211	5.56384	6.10329	5.87829	5.90899	5.95127	5.79594	5.7637
O75369	FLNB	1.12464	0.323612	0.474666	0.695972	0.169457			0.788197		FLN1L FLN3 TABP TAP	Filamin-B OS=Homo sapiens OX=9606 GN=FLNB PE=1 SV=2	0	150.898	20	39	502	37	2602	278	5.73	170.42	39	1	2.00594	2.6433	2.10312	2.4115	2.5193	2.59248	1.94857	2.06092	2.2345
Q9UQE7	SMC3	1.02222	0.0942024	0.805003	0.907456	0.0317103			0.26375		BAM BMH CSPG6 SMC3L1	Structural maintenance of chromosomes protein 3 OS=Homo sapiens OX=9606 GN=SMC3 PE=1 SV=2	0	148.951	26	33	635	33	1217	141.5	7.18	304.6	33	0	3.68141	3.53401	3.77182	3.52067	3.32501	3.41251	3.74258	3.43488	3.71466
Q9NR30	DDX21	1.12741	0.452532	0.352751	0.59131	0.173008			1.05053			Nucleolar RNA helicase 2 OS=Homo sapiens OX=9606 GN=DDX21 PE=1 SV=5	0	148.56	44	33	654	31	783	87.3	9.28	283.89	33	2	4.39083	4.37326	4.22605	3.95072	3.60992	3.81025	4.33311	3.84557	4.29244
Q92841	DDX17	1.15572	0.781975	0.165206	0.341018	0.208788			1.69559			Probable ATP-dependent RNA helicase DDX17 OS=Homo sapiens OX=9606 GN=DDX17 PE=1 SV=2	0	147.423	40	33	1512	23	729	80.2	8.27	727.41	33	9	6.75044	6.755	6.83114	6.69986	6.56884	6.81645	6.77246	6.35614	6.58162
P17844	DDX5	1.05725	0.407386	0.391394	0.623847	0.0803099			0.960057		G17P1 HELR HLR1	Probable ATP-dependent RNA helicase DDX5 OS=Homo sapiens OX=9606 GN=DDX5 PE=1 SV=1	0	146.903	50	30	1572	20	614	69.1	8.92	807.19	30	0	5.64009	5.61127	5.66956	5.30742	5.20114	5.37355	5.7187	5.44525	5.51604
O95347	SMC2	1.26224	1.14053	0.0723547	0.191046	0.335991			2.42521		CAPE SMC2L1	Structural maintenance of chromosomes protein 2 OS=Homo sapiens OX=9606 GN=SMC2 PE=1 SV=2	0	142.942	29	32	542	32	1197	135.6	8.43	218.48	32	0	3.74162	3.80477	3.91755	2.88317	2.8996	3.17891	3.66339	3.23549	3.55709
Q7Z406	MYH14	0.558256	0.696259	0.201252	0.392805	-0.841			-1.52792		KIAA2034	Myosin-14 OS=Homo sapiens OX=9606 GN=MYH14 PE=1 SV=2	0	141.292	17	30	1593	17	1995	227.7	5.6	775.44	30	0	-1.99811	-1.22121	-0.801701	0.92575	1.12705	0.843345	0.149653	-0.35002	-1.29765
P13639	EEF2	1.23407	0.636284	0.231055	0.430906	0.30343			1.41108		EF2	Elongation factor 2 OS=Homo sapiens OX=9606 GN=EEF2 PE=1 SV=4	0	141.105	44	29	652	29	858	95.3	6.83	303.24	29	0	4.76117	5.0314	4.68062	4.89814	4.89254	4.97785	4.72222	4.14724	4.69344
Q6WCQ1	MPRIP	0.956067	0.11894	0.760431	0.887903	-0.0648162			-0.326478		KIAA0864 MRIP RHOIP3	Myosin phosphatase Rho-interacting protein OS=Homo sapiens OX=9606 GN=MPRIP PE=1 SV=3	0	140.806	40	34	369	34	1025	116.5	6.21	155.16	34	0	2.52468	3.0064	2.35115	0.660069	0.935833	0.779883	2.67662	2.64701	2.75305
P52701	MSH6	0.912412	0.16855	0.678345	0.849437	-0.132243			-0.446497		GTBP	DNA mismatch repair protein Msh6 OS=Homo sapiens OX=9606 GN=MSH6 PE=1 SV=2	0	140.697	24	30	705	30	1360	152.7	6.9	339.38	30	0	4.45103	4.25976	4.69981	3.91518	3.87477	4.2147	4.82423	4.91296	4.07014
P68363	TUBA1B	0.750683	1.5379	0.0289803	0.116281	-0.413725			-3.33463			Tubulin alpha-1B chain OS=Homo sapiens OX=9606 GN=TUBA1B PE=1 SV=1	0	140.478	57	21	1438	1	451	50.1	5.06	735.95	21	22	8.00558	7.86751	7.95546	8.0475	7.94521	8.26254	8.5762	8.17523	8.31829
Q92900	UPF1	0.956912	0.301389	0.499587	0.715926	-0.0635424			-0.741456		KIAA0221 RENT1	Regulator of nonsense transcripts 1 OS=Homo sapiens OX=9606 GN=UPF1 PE=1 SV=2	0	140.143	30	28	498	28	1129	124.3	6.61	225.44	28	0	3.61789	3.66753	3.89451	2.46425	2.75147	2.75675	3.80925	3.77739	3.78392
Q9C0C2	TNKS1BP1	0.642397	2.80993	0.00154907	0.0770213	-0.638463			-7.67568	+	KIAA1741 TAB182	182 kDa tankyrase-1-binding protein OS=Homo sapiens OX=9606 GN=TNKS1BP1 PE=1 SV=4	0	139.896	22	29	392	29	1729	181.7	4.86	167.45	29	0	2.86721	2.97073	2.91541	2.68379	2.92713	2.85701	3.50809	3.70813	3.45252
Q01082	SPTBN1	0.931163	0.117496	0.762963	0.888419	-0.102894			-0.322874		SPTB2	Spectrin beta chain, non-erythrocytic 1 OS=Homo sapiens OX=9606 GN=SPTBN1 PE=1 SV=2	0	139.84	18	35	345	35	2364	274.4	5.57	120.5	35	0	2.43538	3.48769	2.86946	2.47266	2.69374	2.88717	3.04261	3.18725	2.87135
Q9ULV0	MYO5B	1.34564	0.554246	0.279096	0.501625	0.428295			1.25104		KIAA1119	Unconventional myosin-Vb OS=Homo sapiens OX=9606 GN=MYO5B PE=1 SV=3	0	137.462	22	36	607	32	1848	213.5	7.2	271.55	36	0	2.79095	2.77833	2.13157	2.58304	2.46394	2.42483	2.54427	1.64257	2.22912
O60716	CTNND1	0.555226	1.8904	0.0128707	0.100702	-0.848853			-4.27775	+	KIAA0384	Catenin delta-1 OS=Homo sapiens OX=9606 GN=CTNND1 PE=1 SV=1	0	136.956	32	26	1045	26	968	108.1	6.23	431.82	26	0	4.50069	4.54886	5.09644	4.75775	4.79407	4.66703	5.55864	5.65965	5.47426
O60506	SYNCRIP	0.694736	1.65871	0.0219426	0.112941	-0.525463			-3.64113		HNRPQ NSAP1	Heterogeneous nuclear ribonucleoprotein Q OS=Homo sapiens OX=9606 GN=SYNCRIP PE=1 SV=2	0	136.221	43	27	809	18	623	69.6	8.59	355.71	27	8	4.88652	4.64502	4.99333	5.25293	5.17439	4.87971	5.32264	5.56006	5.21856
Q5VT25	CDC42BPA	1.20934	0.759047	0.174162	0.355335	0.274224			1.65061		KIAA0451	Serine/threonine-protein kinase MRCK alpha OS=Homo sapiens OX=9606 GN=CDC42BPA PE=1 SV=1	0	136.171	23	33	378	28	1732	197.2	6.58	162.98	33	0	2.08791	2.06981	2.0494	2.33825	2.18768	2.29452	2.11145	1.55143	1.72156
Q9BQE3	TUBA1C	0.7855	1.16133	0.068971	0.187782	-0.348316			-2.46967		TUBA6	Tubulin alpha-1C chain OS=Homo sapiens OX=9606 GN=TUBA1C PE=1 SV=1	0	135.884	51	20	1414	2	449	49.9	5.1	727.61	20	0	1.28042	1.46257	1.45239	0.976569	1.65235	1.26972	1.67821	1.99477	1.56734
O14578	CIT	4.22099	4.15946	6.92691e-05	0.061	2.07758	+	C33A_C-IgG	17.0581	+	CRIK KIAA0949 STK21	Citron Rho-interacting kinase OS=Homo sapiens OX=9606 GN=CIT PE=1 SV=2	0	135.628	20	33	365	33	2027	231.3	6.57	142.96	33	0	3.74729	3.54495	3.94177	1.17562	1.44056	1.37024	1.65196	1.74508	1.60424
P07814	EPRS1	0.746938	1.97496	0.0105934	0.106545	-0.42094			-4.52801		EPRS GLNS PARS QARS QPRS	Bifunctional glutamate/proline--tRNA ligase OS=Homo sapiens OX=9606 GN=EPRS1 PE=1 SV=5	0	134.086	25	29	502	29	1512	170.5	7.33	228.96	29	0	3.84454	3.745	3.85242	3.61556	3.67133	3.45311	4.39684	4.20573	4.10221
Q71U36	TUBA1A	0.746733	1.57929	0.0263454	0.114846	-0.421335			-3.43785		TUBA3	Tubulin alpha-1A chain OS=Homo sapiens OX=9606 GN=TUBA1A PE=1 SV=1	0	131.065	54	20	1375	1	451	50.1	5.06	702.62	20	0	7.98627	7.85056	7.93978	8.02402	7.92142	8.24668	8.5651	8.17003	8.30547
O75533	SF3B1	1.33197	3.01767	0.00096014	0.0843243	0.41356			8.70222	+	SAP155	Splicing factor 3B subunit 1 OS=Homo sapiens OX=9606 GN=SF3B1 PE=1 SV=3	0	129.96	30	28	384	28	1304	145.7	7.09	162.79	28	0	3.26787	3.27857	3.39592	3.53966	3.46837	3.34463	2.85284	2.92893	2.91992
P21333	FLNA	1.12881	0.37829	0.418514	0.650326	0.174806			0.901039		FLN FLN1	Filamin-A OS=Homo sapiens OX=9606 GN=FLNA PE=1 SV=4	0	129.716	15	32	383	30	2647	280.6	6.06	160.42	32	0	1.73531	2.06986	1.82369	1.87287	1.87045	2.05523	1.70656	1.41112	1.98675
P05023	ATP1A1	1.0879	0.373115	0.423531	0.6573	0.121549			0.890474			Sodium/potassium-transporting ATPase subunit alpha-1 OS=Homo sapiens OX=9606 GN=ATP1A1 PE=1 SV=1	0	129.345	33	31	876	20	1023	112.8	5.49	414.62	31	7	4.30925	4.44392	4.35315	4.90598	4.62002	4.7692	4.45236	4.00459	4.28471
Q14697	GANAB	1.06097	0.194073	0.639627	0.830648	0.0853871			0.505755		G2AN KIAA0088	Neutral alpha-glucosidase AB OS=Homo sapiens OX=9606 GN=GANAB PE=1 SV=3	0	128.067	34	24	496	24	944	106.8	6.14	208.81	24	0	3.71559	4.10729	3.55502	3.98857	3.98351	4.38515	3.7757	3.637	3.70904
P29317	EPHA2	1.09005	0.178977	0.662252	0.845271	0.1244			0.470888		ECK	Ephrin type-A receptor 2 OS=Homo sapiens OX=9606 GN=EPHA2 PE=1 SV=2	0	127.89	33	26	893	25	976	108.2	6.23	419.2	26	1	5.46189	5.2632	5.15529	5.57485	5.4526	5.75653	5.58	4.72166	5.20552
Q01813	PFKP	0.998078	0.00471306	0.989206	0.994622	-0.00277503			-0.014392		PFKF	ATP-dependent 6-phosphofructokinase, platelet type OS=Homo sapiens OX=9606 GN=PFKP PE=1 SV=2	0	127.237	41	28	661	27	784	85.5	7.55	295.41	28	1	4.46719	4.41948	4.22497	4.82714	4.71208	4.93655	4.6902	4.0743	4.35545
Q13501	SQSTM1	1.10359	0.23325	0.584453	0.791596	0.142211			0.594039		ORCA OSIL	Sequestosome-1 OS=Homo sapiens OX=9606 GN=SQSTM1 PE=1 SV=1	0	126.84	52	16	1174	16	440	47.7	5.22	415.13	16	0	7.78122	7.76137	7.48046	7.54799	7.32408	7.64345	7.83035	7.10565	7.66042
Q92499	DDX1	0.918942	0.54462	0.285351	0.508376	-0.121954			-1.2322			ATP-dependent RNA helicase DDX1 OS=Homo sapiens OX=9606 GN=DDX1 PE=1 SV=2	0	126.781	41	24	582	24	740	82.4	7.23	230.34	24	0	3.95189	3.90632	4.10288	4.6705	4.75732	4.59842	4.2001	4.17557	3.95129
P02786	TFRC	1.01238	0.0245429	0.945055	0.974499	0.017748			0.073342			Transferrin receptor protein 1 OS=Homo sapiens OX=9606 GN=TFRC PE=1 SV=2	0	124.833	35	26	823	26	760	84.8	6.61	428.42	26	0	6.04886	5.90057	5.77085	6.48932	6.32446	6.66284	6.23975	5.46054	5.96674
O95782	AP2A1	1.40352	0.674475	0.211605	0.407319	0.489053			1.48546		ADTAA CLAPA1	AP-2 complex subunit alpha-1 OS=Homo sapiens OX=9606 GN=AP2A1 PE=1 SV=3	0	123.679	36	28	632	22	977	107.5	7.03	307.84	28	5	4.40924	4.47025	4.47291	4.47529	4.48852	4.46517	4.28537	3.30463	4.29523
P14625	HSP90B1	1.09067	0.430648	0.370981	0.603671	0.125211			1.00682		GRP94 TRA1	Endoplasmin OS=Homo sapiens OX=9606 GN=HSP90B1 PE=1 SV=1	0	122.467	35	26	660	24	803	92.4	4.84	323.96	26	0	3.59974	3.94378	3.67505	4.35119	4.28869	4.33045	3.68219	3.4792	3.68154
O95793	STAU1	1.10709	0.419069	0.381005	0.611292	0.146772			0.983588		STAU	Double-stranded RNA-binding protein Staufen homolog 1 OS=Homo sapiens OX=9606 GN=STAU1 PE=1 SV=2	0	122.306	37	21	562	19	577	63.1	9.44	261.74	21	2	5.2394	5.13362	5.14794	5.00077	5.00017	5.17094	5.26245	4.76115	5.05704
Q9GZR7	DDX24	1.04444	0.239896	0.575577	0.782349	0.0627258			0.608732			ATP-dependent RNA helicase DDX24 OS=Homo sapiens OX=9606 GN=DDX24 PE=1 SV=1	0	122.299	37	24	439	24	859	96.3	9.06	213.4	24	0	3.25322	3.08337	3.15859	3.45621	3.29285	3.44892	3.1858	2.92137	3.19984
P63010	AP2B1	1.63937	0.732648	0.185077	0.372657	0.713137			1.59895		ADTB2 CLAPB1	AP-2 complex subunit beta OS=Homo sapiens OX=9606 GN=AP2B1 PE=1 SV=1	0	121.97	35	27	370	16	937	104.5	5.38	160.95	27	9	3.5438	3.43339	3.37364	3.73616	3.97997	3.79288	3.08714	1.85685	3.26742
P23588	EIF4B	1.13269	0.412534	0.386782	0.617375	0.179755			0.970435			Eukaryotic translation initiation factor 4B OS=Homo sapiens OX=9606 GN=EIF4B PE=1 SV=2	0	119.737	41	24	475	24	611	69.1	5.73	184.98	24	0	3.65138	3.60971	4.07255	3.61811	3.50733	3.25714	3.63815	3.76831	3.38792
Q9BUF5	TUBB6	1.43382	0.431172	0.370534	0.604961	0.519861			1.00787			Tubulin beta-6 chain OS=Homo sapiens OX=9606 GN=TUBB6 PE=1 SV=1	0	119.622	48	19	1170	6	446	49.8	4.88	570.25	19	0	4.3058	2.94351	2.88793	4.94734	4.89112	4.81143	2.93675	2.43476	3.20614
Q99996	AKAP9	0.460334	1.70123	0.0198962	0.107576	-1.11925			-3.75294	+	AKAP350 AKAP450 KIAA0803	A-kinase anchor protein 9 OS=Homo sapiens OX=9606 GN=AKAP9 PE=1 SV=4	0	119.504	11	36	209	36	3907	452.7	4.98	58.2	36	0	-0.255756	0.0204485	0.48128	-0.495668	0.152703	0.0534112	1.14617	1.5836	0.873938
Q9Y5X1	SNX9	0.544619	2.19763	0.00634417	0.0900408	-0.876682			-5.2391	+	SH3PX1 SH3PXD3A	Sorting nexin-9 OS=Homo sapiens OX=9606 GN=SNX9 PE=1 SV=1	0	119.294	37	24	791	24	595	66.6	5.58	324.95	24	0	4.4306	4.40064	4.70049	4.34805	4.39533	4.61613	5.41177	5.61223	5.13778
P19474	TRIM21	0.263736	3.55612	0.000277895	0.0633333	-1.92284			-11.9838	+	RNF81 RO52 SSA1	E3 ubiquitin-protein ligase TRIM21 OS=Homo sapiens OX=9606 GN=TRIM21 PE=1 SV=1	0	118.952	51	25	925	25	475	54.1	6.38	430.56	25	0	5.20505	5.06032	5.42963	5.80508	5.83862	6.12533	6.96234	7.3727	7.12847
Q15154	PCM1	0.767366	1.3083	0.0491699	0.160249	-0.382014			-2.79283			Pericentriolar material 1 protein OS=Homo sapiens OX=9606 GN=PCM1 PE=1 SV=6	0	118.918	15	27	335	27	2024	228.4	5.02	118.24	27	0	2.03377	2.17053	2.26856	2.07956	1.92805	1.90683	2.76444	2.49298	2.36149
P68366	TUBA4A	0.855479	0.465058	0.342722	0.579333	-0.225196			-1.07544		TUBA1	Tubulin alpha-4A chain OS=Homo sapiens OX=9606 GN=TUBA4A PE=1 SV=1	0	117.536	45	18	1086	5	448	49.9	5.06	544.71	18	0	0.33349	0.56318	-0.129507	-0.617868	-0.225518	0.55997	0.47074	0.569536	0.402475
P35527	KRT9	0.894979	0.249743	0.562675	0.768047	-0.160074			-0.630365			Keratin, type I cytoskeletal 9 OS=Homo sapiens OX=9606 GN=KRT9 PE=1 SV=3	0	117.434	45	19	463	19	623	62	5.24	207.04	19	0	5.57909	5.17543	5.91029	3.74786	3.75109	4.11245	5.63456	5.9858	5.52467
P0DMV9	HSPA1B	1.0453	0.226506	0.5936	0.79968	0.0639108			0.579049		HSP72	Heat shock 70 kDa protein 1B OS=Homo sapiens OX=9606 GN=HSPA1B PE=1 SV=1	0	116.203	49	24	680	14	641	70	5.66	308.32	24	4	4.85568	4.77815	4.59053	4.73091	4.57136	4.72113	4.79457	4.53135	4.70671
Q02878	RPL6	1.09719	0.18147	0.658461	0.843415	0.13381			0.476682		TXREB1	Large ribosomal subunit protein eL6 OS=Homo sapiens OX=9606 GN=RPL6 PE=1 SV=3	0	115.31	47	22	1203	22	288	32.7	10.58	643.5	22	0	7.90448	7.66154	7.68172	7.57917	7.28794	7.67169	8.02055	7.10444	7.72132
P14618	PKM	1.06933	0.231969	0.58618	0.793324	0.0967134			0.591197		OIP3 PK2 PK3 PKM2	Pyruvate kinase PKM OS=Homo sapiens OX=9606 GN=PKM PE=1 SV=4	0	113.397	42	20	641	20	531	57.9	7.84	276.59	20	0	5.00063	5.31468	4.83379	5.43176	5.19913	5.43063	5.11054	4.82897	4.91945
Q7Z6Z7	HUWE1	1.15688	0.676517	0.210612	0.405098	0.210241			1.48944		KIAA0312 KIAA1578 UREB1	E3 ubiquitin-protein ligase HUWE1 OS=Homo sapiens OX=9606 GN=HUWE1 PE=1 SV=3	0	113.177	9	30	336	30	4374	481.6	5.22	113.73	30	0	1.51013	1.66288	1.59887	1.8685	1.6878	1.78177	1.56268	1.11905	1.45945
Q9HCE1	MOV10	1.14307	1.26758	0.0540027	0.167034	0.192916			2.70164		KIAA1631	Helicase MOV-10 OS=Homo sapiens OX=9606 GN=MOV10 PE=1 SV=2	0	112.981	31	25	550	25	1003	113.6	8.82	219.39	25	0	3.85883	3.71868	3.9433	3.35347	3.42428	3.26501	3.59488	3.65462	3.69255
O75962	TRIO	1.29287	0.756196	0.175309	0.356648	0.370582			1.64503			Triple functional domain protein OS=Homo sapiens OX=9606 GN=TRIO PE=1 SV=2	0	112.845	13	30	256	30	3097	346.7	6.37	91.48	30	0	2.03846	2.21383	2.2703	1.74581	1.76168	1.63322	2.05599	1.37766	1.9772
P09874	PARP1	1.29644	1.38739	0.0409834	0.141579	0.374554			2.97395		ADPRT PPOL	Poly [ADP-ribose] polymerase 1 OS=Homo sapiens OX=9606 GN=PARP1 PE=1 SV=4	0	112.688	29	25	390	25	1014	113	8.88	159.22	25	0	3.57962	3.7802	3.541	4.01871	3.62962	3.88615	3.40178	3.06192	3.31345
Q9BQG0	MYBBP1A	1.19163	0.987184	0.102995	0.241498	0.252942			2.10565		P160	Myb-binding protein 1A OS=Homo sapiens OX=9606 GN=MYBBP1A PE=1 SV=2	0	112.573	26	27	318	27	1328	148.8	9.28	131.92	27	0	2.40414	2.37363	2.22625	2.18324	2.4768	2.33695	2.03082	1.92748	2.2869
Q92878	RAD50	0.867844	0.47788	0.332751	0.567873	-0.204493			-1.10086			DNA repair protein RAD50 OS=Homo sapiens OX=9606 GN=RAD50 PE=1 SV=1	0	111.138	27	30	338	30	1312	153.8	6.89	129.2	30	0	1.39531	0.993617	1.195	1.50327	1.58243	1.4629	1.57359	1.51279	1.11103
Q15293	RCN1	7.54643	2.49938	0.00316681	0.0852444	2.91579			6.34146	+	RCN	Reticulocalbin-1 OS=Homo sapiens OX=9606 GN=RCN1 PE=1 SV=1	0	110.975	66	19	666	19	331	38.9	5	317.24	19	0	6.46855	6.38229	6.73802	5.88362	5.97962	6.28088	3.07376	4.50116	3.26656
Q9Y446	PKP3	0.856234	0.631335	0.233704	0.434143	-0.223923			-1.40144			Plakophilin-3 OS=Homo sapiens OX=9606 GN=PKP3 PE=1 SV=1	0	110.792	32	22	443	22	797	87	9.32	204.18	22	0	3.16324	3.11457	2.92607	2.68692	2.69856	3.0231	3.5767	3.15719	3.14176
P22314	UBA1	1.29157	1.00043	0.099901	0.235006	0.369129			2.13273		A1S9T UBE1	Ubiquitin-like modifier-activating enzyme 1 OS=Homo sapiens OX=9606 GN=UBA1 PE=1 SV=3	0	110.738	29	23	438	23	1058	117.8	5.76	205.08	23	0	3.5898	3.97691	3.54275	3.61052	3.77307	4.06639	3.45577	3.12486	3.42145
Q9NZB2	FAM120A	0.839644	1.80161	0.0157903	0.105893	-0.25215			-4.02565		C9orf10 KIAA0183 OSSA	Constitutive coactivator of PPAR-gamma-like protein 1 OS=Homo sapiens OX=9606 GN=FAM120A PE=1 SV=2	0	110.244	27	25	458	24	1118	121.8	8.88	205.66	25	1	3.50091	3.4943	3.62031	3.19585	3.01275	3.26156	3.69799	3.8543	3.81968
O43390	HNRNPR	0.728315	1.0282	0.093713	0.225972	-0.457365			-2.1898		HNRPR	Heterogeneous nuclear ribonucleoprotein R OS=Homo sapiens OX=9606 GN=HNRNPR PE=1 SV=1	0	109.863	39	25	616	16	633	70.9	8.13	275.47	25	0	3.60836	3.42814	3.64589	4.16273	4.19663	4.27195	3.96038	4.3859	3.70821
Q14247	CTTN	0.440053	2.43065	0.00370976	0.0872727	-1.18425			-6.07491	+	EMS1	Src substrate cortactin OS=Homo sapiens OX=9606 GN=CTTN PE=1 SV=2	0	109.644	34	22	1265	22	550	61.5	5.4	652.38	22	0	6.36357	6.29897	6.80497	5.14458	5.14358	5.45599	7.71085	7.84736	7.46205
P62424	RPL7A	1.30249	0.531765	0.293924	0.518851	0.381276			1.20701		SURF-3 SURF3	Large ribosomal subunit protein eL8 OS=Homo sapiens OX=9606 GN=RPL7A PE=1 SV=2	0	109.106	52	18	1102	18	266	30	10.61	476.53	18	0	7.5518	7.3401	7.19405	7.18595	6.95915	7.14412	7.41134	6.40774	7.12304
P19338	NCL	1.14356	0.544581	0.285377	0.508051	0.19353			1.23213			Nucleolin OS=Homo sapiens OX=9606 GN=NCL PE=1 SV=3	0	108.698	35	27	774	27	710	76.6	4.7	368.91	27	0	5.62052	5.37067	5.41067	4.93203	4.74217	4.76238	5.49724	5.02584	5.29818
Q99613	EIF3C	1.83156	2.97653	0.00105552	0.08	0.873075			8.48958	+	EIF3S8	Eukaryotic translation initiation factor 3 subunit C OS=Homo sapiens OX=9606 GN=EIF3C PE=1 SV=1	0	108.503	29	24	462	24	913	105.3	5.68	230.75	24	0	4.47145	4.3399	4.69104	4.89014	4.88398	4.81801	3.62448	3.6452	3.61348
Q7Z2W4	ZC3HAV1	1.01534	0.0771448	0.83725	0.924038	0.0219578			0.219166		ZC3HDC2	Zinc finger CCCH-type antiviral protein 1 OS=Homo sapiens OX=9606 GN=ZC3HAV1 PE=1 SV=3	0	107.722	34	24	473	23	902	101.4	8.4	199.48	24	0	3.50247	3.36002	3.36992	3.37993	3.27788	3.36656	3.52389	3.22078	3.42186
P09493	TPM1	1.15443	0.284726	0.519127	0.732756	0.207176			0.706017		C15orf13 TMSA	Tropomyosin alpha-1 chain OS=Homo sapiens OX=9606 GN=TPM1 PE=1 SV=2	0	107.288	49	20	876	8	284	32.7	4.74	440.16	20	0	2.55552	2.13448	2.50112	2.58394	2.8169	3.16277	2.41193	1.66786	2.48981
Q9Y520	PRRC2C	1.15316	0.489111	0.324257	0.557516	0.205593			1.12307		BAT2D1 BAT2L2 KIAA1096 XTP2	Protein PRRC2C OS=Homo sapiens OX=9606 GN=PRRC2C PE=1 SV=4	0	106.918	11	27	304	27	2896	316.7	9.13	123.63	27	0	2.19217	2.3385	2.55846	1.83021	1.59761	1.81597	2.44531	1.94723	2.07981
Q92974	ARHGEF2	1.11366	0.653935	0.221853	0.420339	0.155308			1.44545		KIAA0651 LFP40	Rho guanine nucleotide exchange factor 2 OS=Homo sapiens OX=9606 GN=ARHGEF2 PE=1 SV=4	0	106.79	30	25	394	25	986	111.5	7.27	171.1	25	0	3.28182	3.19532	3.10933	3.26857	3.09272	3.19225	3.23043	2.93802	2.9521
P06733	ENO1	1.10439	0.182263	0.65726	0.843245	0.143252			0.478522		ENO1L1 MBPB1 MPB1	Alpha-enolase OS=Homo sapiens OX=9606 GN=ENO1 PE=1 SV=2	0	106.741	56	21	397	21	434	47.1	7.39	141.35	21	0	4.59929	4.61878	3.71808	4.77952	4.41233	4.69524	4.23705	4.10886	4.16048
P41252	IARS1	0.856149	1.16867	0.067815	0.185237	-0.224066			-2.48544		IARS	Isoleucine--tRNA ligase, cytoplasmic OS=Homo sapiens OX=9606 GN=IARS1 PE=1 SV=2	0	106.428	23	24	479	24	1262	144.4	6.15	208.77	24	0	4.35054	4.18825	4.28431	4.10816	4.01729	3.84257	4.64968	4.399	4.44661
Q6R327	RICTOR	1.25266	0.965317	0.108314	0.248564	0.324997			2.06113		KIAA1999	Rapamycin-insensitive companion of mTOR OS=Homo sapiens OX=9606 GN=RICTOR PE=1 SV=1	0	105.664	19	25	373	25	1708	192.1	7.47	153.46	25	0	2.36793	2.26779	2.35173	2.3586	2.4223	2.42513	2.18253	1.69625	2.13367
P62701	RPS4X	1.11073	0.311962	0.487571	0.707699	0.151507			0.763766		CCG2 RPS4 SCAR	Small ribosomal subunit protein eS4, X isoform OS=Homo sapiens OX=9606 GN=RPS4X PE=1 SV=2	0	105.044	63	19	812	19	263	29.6	10.15	428.95	19	0	6.89519	6.69315	6.65198	6.49074	6.22316	6.51133	6.92695	6.29306	6.5658
P12268	IMPDH2	0.984285	0.053473	0.884152	0.946282	-0.0228519			-0.155238		IMPD2	Inosine-5'-monophosphate dehydrogenase 2 OS=Homo sapiens OX=9606 GN=IMPDH2 PE=1 SV=2	0	105.021	42	17	661	15	514	55.8	6.9	321.73	17	2	5.46369	5.45662	5.38839	5.10232	4.63635	4.98189	5.71204	5.20896	5.45625
Q9BXP5	SRRT	0.648672	1.56354	0.0273187	0.115943	-0.624438			-3.39835		ARS2 ASR2	Serrate RNA effector molecule homolog OS=Homo sapiens OX=9606 GN=SRRT PE=1 SV=1	0	104.148	25	23	453	23	876	100.6	5.96	205.64	23	0	3.05897	2.90157	3.29189	3.02206	2.83916	3.00023	3.5342	3.99557	3.59598
O43707	ACTN4	1.34843	1.17041	0.0675438	0.185543	0.431276			2.48918			Alpha-actinin-4 OS=Homo sapiens OX=9606 GN=ACTN4 PE=1 SV=2	0	103.92	31	25	530	14	911	104.8	5.44	260.68	25	8	3.27925	3.77786	3.58079	3.07568	3.45152	3.50547	2.93321	3.2533	3.15758
Q08J23	NSUN2	1.04543	0.170922	0.67465	0.847869	0.0641007			0.452069		SAKI TRM4	RNA cytosine C(5)-methyltransferase NSUN2 OS=Homo sapiens OX=9606 GN=NSUN2 PE=1 SV=2	0	103.828	36	22	362	22	767	86.4	6.77	153.6	22	0	2.79764	2.92781	2.49438	2.37613	1.82409	1.99281	2.70089	2.76522	2.56142
Q96N67	DOCK7	0.730378	2.39413	0.00403521	0.0875728	-0.453285			-5.93714		KIAA1771	Dedicator of cytokinesis protein 7 OS=Homo sapiens OX=9606 GN=DOCK7 PE=1 SV=4	0	103.684	14	27	337	27	2140	242.4	6.8	133.22	27	0	2.56698	2.47643	2.60007	2.85187	2.03005	2.43997	2.98611	2.89363	3.12359
P06753	TPM3	1.06932	0.0970429	0.799755	0.903749	0.0966981			0.271064			Tropomyosin alpha-3 chain OS=Homo sapiens OX=9606 GN=TPM3 PE=1 SV=2	0	103.425	44	19	1279	8	285	32.9	4.72	582.4	19	0	5.96189	5.73983	5.89271	6.19672	6.37327	6.65411	6.08787	5.06769	6.14878
P0DPH8	TUBA3D	0.784028	1.37102	0.0425578	0.144708	-0.351023			-2.93601			Tubulin alpha-3D chain OS=Homo sapiens OX=9606 GN=TUBA3D PE=1 SV=1	0	103.04	40	15	1045	0	450	49.9	5.1	518.64	15	0	7.58315	7.47988	7.50721	7.68692	7.53643	7.74852	8.09047	7.6956	7.83725
P42704	LRPPRC	0.420717	2.76974	0.00169927	0.0803265	-1.24908			-7.49017	+	LRP130	Leucine-rich PPR motif-containing protein, mitochondrial OS=Homo sapiens OX=9606 GN=LRPPRC PE=1 SV=3	0	102.161	21	25	282	25	1394	157.8	6.13	120.55	25	0	2.30631	2.13652	2.6047	1.93565	1.8547	1.35638	3.40991	3.7179	3.66695
O43143	DHX15	1.14974	0.450158	0.354684	0.592573	0.20131			1.0458		DBP1 DDX15	ATP-dependent RNA helicase DHX15 OS=Homo sapiens OX=9606 GN=DHX15 PE=1 SV=2	0	102.001	27	22	566	22	795	90.9	7.46	247.73	22	0	4.21545	4.55717	4.66279	4.44126	4.4144	4.30279	4.5516	4.14048	4.13941
Q7KZF4	SND1	1.61298	0.973189	0.106368	0.245171	0.689732			2.07713		TDRD11	Staphylococcal nuclease domain-containing protein 1 OS=Homo sapiens OX=9606 GN=SND1 PE=1 SV=1	0	101.785	34	25	434	25	910	101.9	7.17	177.19	25	0	2.75366	3.4023	2.7487	2.56996	2.64994	2.73068	2.55693	1.77688	2.50165
Q9Y6K5	OAS3	1.30578	0.81293	0.15384	0.323039	0.384907			1.75652			2'-5'-oligoadenylate synthase 3 OS=Homo sapiens OX=9606 GN=OAS3 PE=1 SV=3	0	101.729	26	24	381	24	1087	121.1	8.4	153.51	24	0	2.92115	2.9027	2.94809	3.57524	3.53933	3.56147	2.81007	2.10616	2.70098
P51114	FXR1	1.4686	1.54465	0.028533	0.117315	0.554442			3.35135			RNA-binding protein FXR1 OS=Homo sapiens OX=9606 GN=FXR1 PE=1 SV=3	0	101.398	40	21	452	20	621	69.7	6.15	191.16	21	1	4.32977	4.2811	4.2644	3.25025	3.14154	3.31694	4.00995	3.44222	3.75977
O00267	SUPT5H	0.560295	2.19411	0.00639575	0.0888322	-0.835741			-5.22724	+	SPT5 SPT5H	Transcription elongation factor SPT5 OS=Homo sapiens OX=9606 GN=SUPT5H PE=1 SV=1	0	101.311	23	21	338	21	1087	120.9	5.06	128.33	21	0	2.94778	2.96	3.22078	3.34068	3.3729	3.37202	3.64442	4.1042	3.88717
Q96KG9	SCYL1	0.649833	2.59762	0.00252569	0.0790933	-0.62186			-6.73976	+	CVAK90 GKLP NTKL TAPK TEIF TRAP	N-terminal kinase-like protein OS=Homo sapiens OX=9606 GN=SCYL1 PE=1 SV=1	0	101.158	34	19	438	19	808	89.6	6.3	197.41	19	0	4.06798	3.97066	4.23722	3.69182	3.72516	3.93892	4.67742	4.81171	4.65232
Q13435	SF3B2	1.20249	1.6542	0.0221718	0.112042	0.266027			3.62939		SAP145	Splicing factor 3B subunit 2 OS=Homo sapiens OX=9606 GN=SF3B2 PE=1 SV=2	0	101.076	26	20	304	20	895	100.2	5.67	116.16	20	0	2.72662	2.73531	2.86077	2.49239	2.17271	2.41705	2.6011	2.39843	2.52508
O95239	KIF4A	0.575789	1.89803	0.0126464	0.103063	-0.796388			-4.29993	+	KIF4	Chromosome-associated kinesin KIF4A OS=Homo sapiens OX=9606 GN=KIF4A PE=1 SV=3	0	101.074	25	25	334	15	1232	139.8	6.27	137.19	25	3	2.07106	2.28179	2.56172	0.802742	1.09923	0.852909	2.92927	3.32915	3.04531
Q92620	DHX38	0.654506	1.68601	0.0206058	0.107644	-0.611521			-3.71268		DDX38 KIAA0224 PRP16	Pre-mRNA-splicing factor ATP-dependent RNA helicase PRP16 OS=Homo sapiens OX=9606 GN=DHX38 PE=1 SV=2	0	100.632	20	21	303	21	1227	140.4	6.54	134.59	21	0	2.29922	2.07994	2.48967	2.23846	2.44594	2.34591	2.84983	3.12011	2.73345
P16615	ATP2A2	1.00903	0.0382151	0.915767	0.961616	0.0129725			0.112607		ATP2B	Sarcoplasmic/endoplasmic reticulum calcium ATPase 2 OS=Homo sapiens OX=9606 GN=ATP2A2 PE=1 SV=1	0	100.584	25	21	452	21	1042	114.7	5.34	204.77	21	0	3.98296	3.82733	3.82134	4.4753	4.45669	4.61847	4.02491	3.6741	3.8937
Q93008	USP9X	0.958719	0.210125	0.616418	0.815982	-0.0608196			-0.542289		DFFRX FAM USP9	Probable ubiquitin carboxyl-terminal hydrolase FAF-X OS=Homo sapiens OX=9606 GN=USP9X PE=1 SV=4	0	99.155	12	25	297	15	2554	290.3	5.8	120.13	25	6	1.22882	1.15817	1.38516	1.50439	1.51732	1.46665	1.37788	1.14149	1.43524
Q6PKG0	LARP1	1.006	0.0414662	0.908937	0.957224	0.00862567			0.121792		KIAA0731 LARP	La-related protein 1 OS=Homo sapiens OX=9606 GN=LARP1 PE=1 SV=2	0	99.04	27	22	438	22	1096	123.4	8.82	188.44	22	0	3.72086	3.62717	3.69868	3.69321	3.56702	3.55072	3.7622	3.54707	3.71157
P49411	TUFM	0.88866	0.707833	0.19596	0.386583	-0.170297			-1.55049			Elongation factor Tu, mitochondrial OS=Homo sapiens OX=9606 GN=TUFM PE=1 SV=3	0	98.612	47	17	466	17	455	49.8	7.61	224.1	17	0	4.91529	4.74041	4.57972	4.60481	4.5634	4.77693	5.00396	4.82487	4.91748
Q07065	CKAP4	0.95675	0.120473	0.757753	0.88847	-0.0637868			-0.330295			Cytoskeleton-associated protein 4 OS=Homo sapiens OX=9606 GN=CKAP4 PE=1 SV=2	0	98.463	46	21	588	21	602	66	5.92	273.53	21	0	4.11904	4.03074	4.04754	4.68525	4.59539	4.677	4.47722	3.81776	4.0937
Q00341	HDLBP	1.0651	0.568415	0.270137	0.485235	0.090987			1.27875		HBP VGL	Vigilin OS=Homo sapiens OX=9606 GN=HDLBP PE=1 SV=3	0	97.865	23	23	432	23	1268	141.4	6.87	170.92	23	0	2.94842	3.17561	3.12364	2.56603	2.61453	2.37573	3.02057	2.99679	2.95735
O94964	MTCL2	0.529617	0.432696	0.369236	0.604739	-0.916979			-1.01093		C20orf117 KIAA0889 SOGA SOGA1	Microtubule cross-linking factor 2 OS=Homo sapiens OX=9606 GN=MTCL2 PE=1 SV=3	0	97.654	19	25	236	23	1661	183.7	6.52	76.24	25	1	0.766392	0.537714	0.569026	-1.17899	-0.110857	-0.948754	2.49993	-0.266012	2.39015
Q07666	KHDRBS1	0.45384	2.45392	0.00351622	0.0857732	-1.13975			-6.16408	+	SAM68	KH domain-containing, RNA-binding, signal transduction-associated protein 1 OS=Homo sapiens OX=9606 GN=KHDRBS1 PE=1 SV=1	0	97.168	30	16	1131	13	443	48.2	8.66	646.1	16	2	6.52737	6.40241	6.83663	6.59822	6.43183	6.77833	7.7035	7.96938	7.51276
P43243	MATR3	1.00847	0.0390752	0.913955	0.960331	0.0121729			0.115043		KIAA0723	Matrin-3 OS=Homo sapiens OX=9606 GN=MATR3 PE=1 SV=2	0	97.145	30	21	422	21	847	94.6	6.25	196.95	21	0	2.82542	2.75737	3.04443	3.61434	3.59891	3.77899	2.79466	2.98478	2.81126
Q14764	MVP	0.827707	0.785417	0.163902	0.33999	-0.272807			-1.70236		LRP	Major vault protein OS=Homo sapiens OX=9606 GN=MVP PE=1 SV=4	0	97.132	31	20	351	20	893	99.3	5.48	142.84	20	0	2.16463	1.99372	1.73823	3.01623	2.94477	2.82715	2.25138	2.40749	2.05613
P11021	HSPA5	1.05685	1.02008	0.0954812	0.227741	0.0797656			2.17307		GRP78	Endoplasmic reticulum chaperone BiP OS=Homo sapiens OX=9606 GN=HSPA5 PE=1 SV=2	0	97.015	34	21	468	19	654	72.3	5.16	186.17	21	0	2.89566	2.94147	2.87987	3.13431	3.08625	3.2371	2.76825	2.87765	2.8318
Q2M1P5	KIF7	0.804407	0.588408	0.257984	0.466999	-0.314002			-1.31777			Kinesin-like protein KIF7 OS=Homo sapiens OX=9606 GN=KIF7 PE=1 SV=2	0	96.829	25	25	353	24	1343	150.5	6.79	131.14	25	0	0.857246	0.388686	1.20197	0.400982	0.864023	0.779678	1.1004	1.19992	1.08958
Q04637	EIF4G1	0.970098	0.158904	0.69358	0.856276	-0.0437974			-0.423694		EIF4F EIF4G EIF4GI	Eukaryotic translation initiation factor 4 gamma 1 OS=Homo sapiens OX=9606 GN=EIF4G1 PE=1 SV=4	0	96.705	17	23	340	22	1599	175.4	5.33	155.03	23	1	2.81853	2.87111	3.07253	1.73234	1.6967	1.97992	2.89894	3.1015	2.89313
Q9BYK8	HELZ2	0.929322	0.0268008	0.940154	0.974195	-0.105749			-0.0799001		KIAA1769 PRIC285	3'-5' exoribonuclease HELZ2 OS=Homo sapiens OX=9606 GN=HELZ2 PE=1 SV=7	0	96.232	11	29	259	29	2896	322.1	8	75.74	29	0	-5.88542	-2.40745	-1.7632	-2.79387	-2.64913	-1.71547	-3.90193	-3.04227	-2.79462
Q13459	MYO9B	1.36244	1.3914	0.0406068	0.141576	0.446192			2.98328		MYR5	Unconventional myosin-IXb OS=Homo sapiens OX=9606 GN=MYO9B PE=1 SV=3	0	96.07	13	24	232	23	2157	243.2	8.75	85.41	24	0	2.05981	1.92026	1.73248	1.4737	0.784324	1.37931	1.57926	1.22678	1.56794
P51991	HNRNPA3	1.05438	0.389633	0.407725	0.638608	0.0763885			0.924122		HNRPA3	Heterogeneous nuclear ribonucleoprotein A3 OS=Homo sapiens OX=9606 GN=HNRNPA3 PE=1 SV=2	0	96.047	44	17	225	17	378	39.6	9.01	79.15	17	0	3.21242	2.99849	3.10248	3.8064	3.5224	3.65261	3.04811	3.11162	2.9245
B5ME19	EIF3CL	1.82947	2.97441	0.0010607	0.078	0.871429			8.47871	+		Eukaryotic translation initiation factor 3 subunit C-like protein OS=Homo sapiens OX=9606 GN=EIF3CL PE=1 SV=1	0	95.56	28	22	451	22	914	105.4	5.64	222.17	22	0	4.45855	4.31683	4.66684	4.86886	4.87024	4.80907	3.61113	3.6347	3.58211
Q13751	LAMB3	0.941449	0.302476	0.498338	0.714267	-0.0870454			-0.743757		LAMNB1	Laminin subunit beta-3 OS=Homo sapiens OX=9606 GN=LAMB3 PE=1 SV=1	0	95.202	27	24	366	24	1172	129.5	7.21	155	24	0	2.91098	2.5785	2.66285	2.5501	2.08938	2.27179	2.88772	2.8405	2.68526
P23396	RPS3	1.19486	0.619671	0.240065	0.440854	0.256843			1.37872			Small ribosomal subunit protein uS3 OS=Homo sapiens OX=9606 GN=RPS3 PE=1 SV=2	0	95.198	58	13	1073	13	243	26.7	9.66	532.61	13	0	7.15684	7.29836	7.08602	6.74118	6.58664	6.73222	7.23939	6.63293	6.89837
Q12906	ILF3	0.866025	0.911309	0.122657	0.270154	-0.207519			-1.95213		DRBF MPHOSPH4 NF90	Interleukin enhancer-binding factor 3 OS=Homo sapiens OX=9606 GN=ILF3 PE=1 SV=3	0	95.118	20	16	338	13	894	95.3	8.76	118.31	16	3	3.60576	3.48365	3.69011	2.91679	3.07925	3.06433	3.93878	3.82558	3.63771
P52272	HNRNPM	1.25333	0.749329	0.178103	0.360958	0.325769			1.63158		HNRPM NAGR1	Heterogeneous nuclear ribonucleoprotein M OS=Homo sapiens OX=9606 GN=HNRNPM PE=1 SV=3	0	95.068	28	21	734	21	730	77.5	8.7	348.91	21	0	5.53521	5.41503	5.25975	5.71178	5.47788	5.73826	5.34032	4.7254	5.16696
P68104	EEF1A1	0.894552	0.419567	0.380568	0.611213	-0.160763			-0.984589		EEF1A EF1A LENG7	Elongation factor 1-alpha 1 OS=Homo sapiens OX=9606 GN=EEF1A1 PE=1 SV=1	0	95.033	42	14	781	8	462	50.1	9.01	338.37	14	5	6.71333	6.78264	6.51696	6.49597	6.28404	6.62733	7.11077	6.6413	6.74314
Q5VTE0	EEF1A1P5	0.894552	0.419567	0.380568	0.610883	-0.160763			-0.984589		EEF1AL3	Putative elongation factor 1-alpha-like 3 OS=Homo sapiens OX=9606 GN=EEF1A1P5 PE=5 SV=1	0	95.033	42	14	781	8	462	50.2	9.07	338.37	14	0	6.71333	6.78264	6.51696	6.49597	6.28404	6.62733	7.11077	6.6413	6.74314
P08729	KRT7	1.03197	0.167424	0.680106	0.850289	0.0453944			0.443847		SCL	Keratin, type II cytoskeletal 7 OS=Homo sapiens OX=9606 GN=KRT7 PE=1 SV=5	0	94.895	43	21	762	18	469	51.4	5.48	399.48	21	1	5.00382	5.02503	4.91291	4.74633	4.72741	4.93172	5.03898	4.74275	5.02385
O60841	EIF5B	1.28328	2.04935	0.00892596	0.0946739	0.359837			4.75683		IF2 KIAA0741	Eukaryotic translation initiation factor 5B OS=Homo sapiens OX=9606 GN=EIF5B PE=1 SV=4	0	94.892	20	23	287	23	1220	138.7	5.49	96.35	23	0	2.62903	2.50737	2.60149	1.49997	1.49473	0.95862	2.22697	2.10145	2.32996
P54136	RARS1	0.802953	1.15335	0.0702499	0.188198	-0.316613			-2.45258		RARS	Arginine--tRNA ligase, cytoplasmic OS=Homo sapiens OX=9606 GN=RARS1 PE=1 SV=2	0	94.4	37	22	441	22	660	75.3	6.68	211.05	22	0	3.65032	3.51675	3.65528	3.48693	3.60849	3.33002	4.16293	3.7726	3.83665
Q9NS87	KIF15	19.7856	4.71627	1.9219e-05	0	4.30638	+	C33A_C-IgG	23.5671	+	KLP2 KNSL7	Kinesin-like protein KIF15 OS=Homo sapiens OX=9606 GN=KIF15 PE=1 SV=1	0	94.073	21	24	238	24	1388	160.1	6	85.52	24	0	2.60961	2.50293	2.82392	2.12701	2.08729	2.44699	-1.90369	-1.36852	-1.71045
O14950	MYL12B	1.12683	0.152124	0.704492	0.862252	0.17227			0.407522		MRLC2 MYLC2B	Myosin regulatory light chain 12B OS=Homo sapiens OX=9606 GN=MYL12B PE=1 SV=2	0	94.043	56	12	2301	12	172	19.8	4.84	1256.51	12	0	9.67807	9.25651	9.20482	9.99631	9.79471	10.1356	9.74365	8.43635	9.44258
P19105	MYL12A	1.12683	0.152124	0.704492	0.861919	0.17227			0.407522		MLCB MRLC3 RLC	Myosin regulatory light chain 12A OS=Homo sapiens OX=9606 GN=MYL12A PE=1 SV=2	0	94.043	56	12	2301	12	171	19.8	4.81	1256.51	12	0	9.67807	9.25651	9.20482	9.99631	9.79471	10.1356	9.74365	8.43635	9.44258
Q86VI3	IQGAP3	1.2237	0.615767	0.242233	0.444547	0.291248			1.37111			Ras GTPase-activating-like protein IQGAP3 OS=Homo sapiens OX=9606 GN=IQGAP3 PE=1 SV=2	0	93.797	19	24	289	22	1631	184.6	7.65	103.23	24	0	1.15529	1.38521	1.24302	-1.0126	0.619835	-0.33796	1.04159	0.590513	1.27768
Q69YQ0	SPECC1L	0.808754	0.413664	0.385777	0.616088	-0.306227			-0.972712		CYTSA KIAA0376	Cytospin-A OS=Homo sapiens OX=9606 GN=SPECC1L PE=1 SV=3	0	92.897	20	20	237	20	1117	124.5	5.76	92.31	20	0	0.983154	2.01595	1.54604	-0.100144	0.731826	0.507522	1.69235	2.01794	1.75355
Q9UQ35	SRRM2	1.30614	2.11339	0.00770212	0.0887168	0.38531			4.96073		KIAA0324 SRL300 SRM300	Serine/arginine repetitive matrix protein 2 OS=Homo sapiens OX=9606 GN=SRRM2 PE=1 SV=2	0	92.89	12	23	330	23	2752	299.4	12.06	139.76	23	0	2.60383	2.58986	2.67281	2.879	2.63003	2.70959	2.28418	2.093	2.33338
Q9Y262	EIF3L	1.71331	2.51228	0.00307411	0.0867586	0.776785			6.39259	+	EIF3EIP EIF3S6IP	Eukaryotic translation initiation factor 3 subunit L OS=Homo sapiens OX=9606 GN=EIF3L PE=1 SV=1	0	92.644	32	17	369	17	564	66.7	6.34	154.36	17	0	3.43095	3.29349	3.68674	3.7846	3.8955	3.70678	2.75488	2.70364	2.6223
P54886	ALDH18A1	1.34836	1.73584	0.0183722	0.106492	0.431206			3.84556		GSAS P5CS PYCS	Delta-1-pyrroline-5-carboxylate synthase OS=Homo sapiens OX=9606 GN=ALDH18A1 PE=1 SV=2	0	91.33	27	19	472	19	795	87.2	7.12	176.08	19	0	2.23486	2.31686	2.23875	2.53712	2.61316	2.28014	1.89882	1.6194	1.97862
P25705	ATP5F1A	0.947779	0.666444	0.215554	0.413272	-0.0773775			-1.46982		ATP5A ATP5A1 ATP5AL2 ATPM	ATP synthase subunit alpha, mitochondrial OS=Homo sapiens OX=9606 GN=ATP5F1A PE=1 SV=1	0	90.828	37	16	601	16	553	59.7	9.13	285.48	16	0	4.84794	4.74134	4.66748	4.58702	4.59251	4.67234	4.83055	4.8383	4.82005
P47897	QARS1	0.86623	1.86706	0.0135814	0.101933	-0.207178			-4.21044		QARS	Glutamine--tRNA ligase OS=Homo sapiens OX=9606 GN=QARS1 PE=1 SV=1	0	90.79	32	24	393	24	775	87.7	7.15	151.74	24	0	2.39463	2.42183	2.47109	2.47183	2.27654	2.06807	2.72309	2.60396	2.58203
P23258	TUBG1	0.841008	1.76033	0.0173649	0.104727	-0.249808			-3.91197		TUBG	Tubulin gamma-1 chain OS=Homo sapiens OX=9606 GN=TUBG1 PE=1 SV=2	0	90.734	48	19	384	19	451	51.1	6.14	145.19	19	0	3.06914	3.00502	3.01209	2.91536	2.76468	2.82233	3.39436	3.19001	3.25131
Q96S66	CLCC1	0.0740766	3.08969	0.000813405	0.0827879	-3.75484			-9.08639	+	KIAA0761 MCLC	Chloride channel CLIC-like protein 1 OS=Homo sapiens OX=9606 GN=CLCC1 PE=1 SV=1	0	90.612	45	20	125	20	551	62	5.55	44.89	20	0	-0.999915	-1.28582	-0.0203166	-1.30848	-1.14802	-2.03342	3.1159	3.16458	2.67798
P42695	NCAPD3	1.72998	2.4915	0.0032248	0.0833913	0.790753			6.3104	+	CAPD3 KIAA0056	Condensin-2 complex subunit D3 OS=Homo sapiens OX=9606 GN=NCAPD3 PE=1 SV=2	0	90.495	22	24	209	24	1498	168.8	7.5	68.38	24	0	2.20019	2.38035	2.24916	1.07561	1.45768	0.90925	1.6268	1.26195	1.56869
P15311	EZR	1.13908	0.967314	0.107817	0.247444	0.187872			2.06519		VIL2	Ezrin OS=Homo sapiens OX=9606 GN=EZR PE=1 SV=4	0	90.467	31	22	365	16	586	69.4	6.27	185.96	22	0	1.86932	2.15948	1.94868	1.90643	1.81946	1.28221	1.86028	1.77279	1.7808
Q7Z478	DHX29	1.39934	1.26107	0.0548189	0.166133	0.484742			2.68717		DDX29	ATP-dependent RNA helicase DHX29 OS=Homo sapiens OX=9606 GN=DHX29 PE=1 SV=2	0	90.465	17	20	356	19	1369	155.1	8.09	156.2	20	1	2.89355	3.1272	3.14416	2.30506	2.07922	1.98051	2.86581	2.31071	2.53416
P51659	HSD17B4	1.04754	0.12834	0.744149	0.883185	0.0670121			0.349773		EDH17B4 SDR8C1	Peroxisomal multifunctional enzyme type 2 OS=Homo sapiens OX=9606 GN=HSD17B4 PE=1 SV=3	0	90.378	31	17	351	17	736	79.6	8.84	157.17	17	0	2.55056	3.18888	2.84461	2.78178	2.96388	2.93113	2.8178	2.86997	2.69525
A5YKK6	CNOT1	1.11797	0.553009	0.279892	0.502723	0.160883			1.24863		CDC39 KIAA1007 NOT1	CCR4-NOT transcription complex subunit 1 OS=Homo sapiens OX=9606 GN=CNOT1 PE=1 SV=2	0	90.336	9	22	336	22	2376	266.8	7.11	139.4	22	0	1.89241	1.86881	1.91947	1.63146	1.59572	1.77862	1.89309	1.47966	1.8253
P13647	KRT5	0.823554	0.250849	0.561243	0.768735	-0.280065			-0.632785			Keratin, type II cytoskeletal 5 OS=Homo sapiens OX=9606 GN=KRT5 PE=1 SV=3	0	90.299	30	21	346	10	590	62.3	7.74	161.35	21	2	2.02238	1.94163	2.93574	-2.14372	-1.34714	0.644002	2.05918	3.12216	2.55861
P02545	LMNA	1.00328	0.0262823	0.941278	0.974283	0.00472275			0.0783969		LMN1	Prelamin-A/C OS=Homo sapiens OX=9606 GN=LMNA PE=1 SV=1	0	89.855	37	21	300	20	664	74.1	7.02	126.89	21	1	3.51867	3.38449	3.53781	3.05015	3.02888	3.31447	3.48079	3.41066	3.53535
Q13200	PSMD2	1.02019	0.0875429	0.817442	0.913862	0.0288379			0.246481		TRAP2	26S proteasome non-ATPase regulatory subunit 2 OS=Homo sapiens OX=9606 GN=PSMD2 PE=1 SV=3	0	89.694	28	20	223	20	908	100.1	5.2	85.12	20	0	2.78721	3.0305	2.90647	2.72297	2.8121	2.64125	2.96502	2.69229	2.98035
Q8WUM4	PDCD6IP	1.01283	0.0364014	0.919599	0.963565	0.0183977			0.107459		AIP1 ALIX KIAA1375	Programmed cell death 6-interacting protein OS=Homo sapiens OX=9606 GN=PDCD6IP PE=1 SV=1	0	89.641	27	20	355	20	868	96	6.52	147.78	20	0	3.34763	3.43339	3.26312	3.32066	3.5211	3.5944	3.61391	3.0458	3.32924
P26038	MSN	1.25491	0.800342	0.158364	0.330124	0.327581			1.73172			Moesin OS=Homo sapiens OX=9606 GN=MSN PE=1 SV=3	0	89.511	33	24	335	17	577	67.8	6.4	161.65	24	6	3.97639	4.52219	3.93622	4.108	3.90541	3.96651	3.81341	3.80542	3.83323
P11586	MTHFD1	0.878386	1.53115	0.0294343	0.117702	-0.187072			-3.31797		MTHFC MTHFD	C-1-tetrahydrofolate synthase, cytoplasmic OS=Homo sapiens OX=9606 GN=MTHFD1 PE=1 SV=4	0	89.362	21	20	505	20	935	101.5	7.3	265.34	20	0	3.86498	3.9954	3.87255	3.85186	3.76958	3.98149	4.10223	4.03144	4.16048
Q13310	PABPC4	1.02754	0.155688	0.698734	0.860408	0.0391985			0.41604		APP1 PABP4	Polyadenylate-binding protein 4 OS=Homo sapiens OX=9606 GN=PABPC4 PE=1 SV=1	0	89.218	29	17	384	12	644	70.7	9.26	182.67	17	0	3.51374	3.56461	3.80539	2.54001	2.4444	2.35009	3.64303	3.57373	3.54938
Q9NYL9	TMOD3	1.17799	0.317225	0.481698	0.703536	0.236333			0.774822			Tropomodulin-3 OS=Homo sapiens OX=9606 GN=TMOD3 PE=1 SV=1	0	89.139	56	17	588	16	352	39.6	5.19	272.48	17	1	5.68962	5.54705	5.42109	6.10568	5.8676	6.32604	5.73345	4.74639	5.46893
P11940	PABPC1	1.19376	1.28269	0.052157	0.165056	0.255517			2.73531		PAB1 PABP PABP1 PABPC2	Polyadenylate-binding protein 1 OS=Homo sapiens OX=9606 GN=PABPC1 PE=1 SV=2	0	88.984	28	18	535	9	636	70.6	9.5	254.26	18	6	5.38472	5.44707	5.53004	4.3688	4.30496	4.44894	5.3462	5.05756	5.19153
P55884	EIF3B	1.74886	1.8531	0.0140249	0.104774	0.806415			4.17056	+	EIF3S9	Eukaryotic translation initiation factor 3 subunit B OS=Homo sapiens OX=9606 GN=EIF3B PE=1 SV=3	0	88.46	26	17	386	17	814	92.4	5	185.15	17	0	3.466	3.46071	3.83789	4.04561	3.95901	3.98755	2.62947	3.07703	2.63887
P05198	EIF2S1	1.3636	0.969014	0.107396	0.246518	0.44742			2.06864		EIF2A	Eukaryotic translation initiation factor 2 subunit 1 OS=Homo sapiens OX=9606 GN=EIF2S1 PE=1 SV=3	0	88.224	60	19	389	19	315	36.1	5.08	161.64	19	0	3.87914	4.06069	4.0197	3.7199	3.47838	3.52995	3.90346	3.17886	3.53495
P53618	COPB1	0.925135	0.409335	0.389641	0.621237	-0.112265			-0.963989		COPB	Coatomer subunit beta OS=Homo sapiens OX=9606 GN=COPB1 PE=1 SV=3	0	88.212	34	23	333	23	953	107.1	6.05	112.49	23	0	2.92625	2.93552	2.80094	2.97348	2.98352	3.26281	3.09714	2.78404	3.11832
Q5JTH9	RRP12	1.25081	1.31096	0.0488696	0.16	0.322863			2.79883		KIAA0690	RRP12-like protein OS=Homo sapiens OX=9606 GN=RRP12 PE=1 SV=2	0	88.094	23	21	260	21	1297	143.6	8.75	92.33	21	0	1.89778	1.91477	1.58784	1.97236	1.82777	1.63982	1.52849	1.38778	1.51553
Q9UPY3	DICER1	0.763318	0.960756	0.109457	0.251096	-0.389644			-2.05187		DICER HERNA KIAA0928	Endoribonuclease Dicer OS=Homo sapiens OX=9606 GN=DICER1 PE=1 SV=3	0	87.62	15	21	251	21	1922	218.5	5.68	82.06	21	0	1.01153	1.25699	1.24382	0.719112	1.00898	1.05358	1.37006	1.90448	1.40673
P49368	CCT3	1.07794	0.663542	0.216999	0.4164	0.108274			1.46416		CCTG TRIC5	T-complex protein 1 subunit gamma OS=Homo sapiens OX=9606 GN=CCT3 PE=1 SV=4	0	87.274	38	19	445	19	545	60.5	6.49	185.79	19	0	3.67109	3.54765	3.6417	3.73848	3.63554	3.5639	3.59818	3.3871	3.55034
P60660	MYL6	0.843664	0.283992	0.520005	0.733308	-0.24526			-0.704449			Myosin light polypeptide 6 OS=Homo sapiens OX=9606 GN=MYL6 PE=1 SV=2	0	87.187	88	13	1020	10	151	16.9	4.65	543.47	13	4	8.65223	8.3986	8.26182	8.943	8.90369	8.93706	9.12578	8.04033	8.88232
Q9UHB6	LIMA1	1.1796	0.24219	0.572546	0.780421	0.238302			0.613785		EPLIN SREBP3	LIM domain and actin-binding protein 1 OS=Homo sapiens OX=9606 GN=LIMA1 PE=1 SV=1	0	86.421	30	17	249	17	759	85.2	6.84	75.83	17	0	1.9105	2.79331	1.80609	1.60699	1.40323	1.45682	1.48425	2.24444	2.06631
O94915	FRYL	13.2362	2.35439	0.00442187	0.0908991	3.72642			5.79018	+	AF4P12 KIAA0826	Protein furry homolog-like OS=Homo sapiens OX=9606 GN=FRYL PE=1 SV=2	0	85.671	9	23	274	23	3013	339.4	5.58	101.97	23	0	2.0485	2.06026	2.41542	2.29028	2.21462	2.37038	-2.20731	-0.287557	-2.16021
Q9NYF8	BCLAF1	1.00689	0.0127921	0.970975	0.983717	0.00991261			0.0387126		BTF KIAA0164	Bcl-2-associated transcription factor 1 OS=Homo sapiens OX=9606 GN=BCLAF1 PE=1 SV=2	0	85.401	29	21	322	20	920	106.1	9.98	124.57	21	1	2.03197	1.92374	2.17481	2.73704	2.74979	2.24628	1.83448	2.52187	1.74443
P42166	TMPO	1.34551	2.02314	0.00948115	0.11045	0.428153			4.67525		LAP2	Lamina-associated polypeptide 2, isoform alpha OS=Homo sapiens OX=9606 GN=TMPO PE=1 SV=2	0	85.397	39	18	425	12	694	75.4	7.66	185.44	18	5	4.31772	4.29462	4.41992	3.34234	2.6523	3.03707	4.08087	3.81584	3.85109
Q12968	NFATC3	0.57679	1.84013	0.0144502	0.104876	-0.793883			-4.13371	+	NFAT4	Nuclear factor of activated T-cells, cytoplasmic 3 OS=Homo sapiens OX=9606 GN=NFATC3 PE=1 SV=1	0	85.323	21	16	294	16	1075	115.5	6.37	134.1	16	0	2.29107	2.15403	2.31201	1.82131	2.01876	1.74348	3.06282	3.35904	2.71691
P31943	HNRNPH1	0.621887	1.93612	0.0115846	0.102609	-0.685277			-4.41177		HNRPH HNRPH1	Heterogeneous nuclear ribonucleoprotein H OS=Homo sapiens OX=9606 GN=HNRNPH1 PE=1 SV=4	0	84.98	45	14	1052	7	449	49.2	6.3	508.13	14	7	5.57014	5.54219	5.8862	5.47944	5.47009	5.79325	6.44979	6.47147	6.13309
P28799	GRN	0.563474	1.81359	0.0153606	0.106034	-0.82758			-4.05906	+		Progranulin OS=Homo sapiens OX=9606 GN=GRN PE=1 SV=2	0	84.82	23	14	474	14	593	63.5	6.83	230.2	14	0	4.42041	4.11131	4.4554	5.08189	4.90057	5.27948	5.41615	5.22263	4.83108
P14923	JUP	1.22813	0.726102	0.187888	0.375551	0.296461			1.58616		CTNNG DP3	Junction plakoglobin OS=Homo sapiens OX=9606 GN=JUP PE=1 SV=3	0	84.798	29	16	458	15	745	81.7	6.14	243	16	1	3.68101	3.49693	3.3691	3.84344	3.97714	4.01944	3.44941	2.90294	3.30531
O00308	WWP2	1.1337	0.32925	0.468544	0.690697	0.181034			0.799968			NEDD4-like E3 ubiquitin-protein ligase WWP2 OS=Homo sapiens OX=9606 GN=WWP2 PE=1 SV=2	0	84.777	30	22	299	20	870	98.9	7.12	147.66	22	1	3.12931	2.91808	2.92398	2.8437	2.7849	2.51568	3.06839	2.38182	2.97804
O95340	PAPSS2	0.985615	0.0360794	0.920281	0.963401	-0.0209045			-0.106543		ATPSK2	Bifunctional 3'-phosphoadenosine 5'-phosphosulfate synthase 2 OS=Homo sapiens OX=9606 GN=PAPSS2 PE=1 SV=2	0	84.757	36	18	319	17	614	69.5	8.03	113.55	18	1	2.73483	2.60039	2.67124	2.84914	2.71617	2.69133	3.0712	2.45622	2.54176
O75592	MYCBP2	0.986665	0.046601	0.898254	0.953429	-0.0193681			-0.136185		KIAA0916 PAM	E3 ubiquitin-protein ligase MYCBP2 OS=Homo sapiens OX=9606 GN=MYCBP2 PE=1 SV=4	0	84.67	6	24	205	24	4678	513.3	7.02	56.27	24	0	0.181833	0.450249	0.519091	0.58355	0.358434	0.39766	0.599412	0.300756	0.309109
O43242	PSMD3	0.919637	0.735455	0.183885	0.371098	-0.120864			-1.60444			26S proteasome non-ATPase regulatory subunit 3 OS=Homo sapiens OX=9606 GN=PSMD3 PE=1 SV=2	0	84.357	37	20	290	20	534	60.9	8.44	125.59	20	0	2.89591	3.02526	2.8406	2.81086	3.22424	2.84653	3.11546	3.06718	2.94173
Q9H0A0	NAT10	1.22688	0.638001	0.230144	0.430707	0.294992			1.41442		ALP KIAA1709	RNA cytidine acetyltransferase OS=Homo sapiens OX=9606 GN=NAT10 PE=1 SV=2	0	84.037	24	20	347	20	1025	115.7	8.27	144.2	20	0	3.04877	3.05257	2.9545	2.23227	2.02925	2.4613	2.98291	2.31652	2.87144
Q7L014	DDX46	1.11482	1.34734	0.0449432	0.147224	0.156811			2.88154		KIAA0801	Probable ATP-dependent RNA helicase DDX46 OS=Homo sapiens OX=9606 GN=DDX46 PE=1 SV=2	0	83.827	20	20	443	20	1031	117.3	9.29	213.47	20	0	3.40688	3.35775	3.53401	3.30788	3.21038	3.26821	3.26329	3.30455	3.26035
Q9BUJ2	HNRNPUL1	1.3019	1.54473	0.0285278	0.117585	0.380622			3.35155		E1BAP5 HNRPUL1	Heterogeneous nuclear ribonucleoprotein U-like protein 1 OS=Homo sapiens OX=9606 GN=HNRNPUL1 PE=1 SV=2	0	83.798	27	18	303	18	856	95.7	6.92	118.4	18	0	4.38487	4.05155	4.23879	3.64741	3.96668	3.89991	3.90121	3.90749	3.72464
O60610	DIAPH1	1.20264	0.622668	0.238414	0.440258	0.2662			1.38455		DIAP1	Protein diaphanous homolog 1 OS=Homo sapiens OX=9606 GN=DIAPH1 PE=1 SV=2	0	83.695	18	17	306	17	1272	141.3	5.41	134.83	17	0	3.52172	3.63797	3.31859	3.07962	2.80169	3.16878	3.40692	2.89068	3.38208
P04920	SLC4A2	2.2051	2.16585	0.00682582	0.0892739	1.14084			5.13268	+	AE2 EPB3L1 HKB3 MPB3L	Anion exchange protein 2 OS=Homo sapiens OX=9606 GN=SLC4A2 PE=1 SV=4	0	83.621	20	19	337	19	1241	136.9	6.29	120.53	19	0	2.73846	2.38084	2.62901	1.96484	1.97042	2.10209	1.70268	1.05927	1.56383
Q9HCC0	MCCC2	0.873808	0.703401	0.19797	0.389449	-0.194611			-1.54185		MCCB	Methylcrotonoyl-CoA carboxylase beta chain, mitochondrial OS=Homo sapiens OX=9606 GN=MCCC2 PE=1 SV=1	0	83.399	34	17	206	17	563	61.3	7.68	64.26	17	0	1.80173	1.95579	1.60147	2.22111	2.37305	2.4439	1.91965	1.89578	2.12741
P31689	DNAJA1	1.00436	0.00817347	0.981356	0.990987	0.00628169			0.024862		DNAJ2 HDJ2 HSJ2 HSPF4	DnaJ homolog subfamily A member 1 OS=Homo sapiens OX=9606 GN=DNAJA1 PE=1 SV=2	0	83.28	44	16	302	16	397	44.8	7.08	133.5	16	0	3.46997	3.324	3.74091	3.31496	2.8933	3.45882	3.6645	3.06833	3.78321
P17858	PFKL	1.03167	0.142939	0.71955	0.869657	0.0449863			0.385413			ATP-dependent 6-phosphofructokinase, liver type OS=Homo sapiens OX=9606 GN=PFKL PE=1 SV=6	0	83.152	30	17	357	15	780	85	7.5	148.83	17	1	2.82643	2.63177	2.60852	3.30421	3.57003	3.12426	2.56375	2.83143	2.53659
Q15654	TRIP6	0.546152	2.25171	0.00560133	0.0894118	-0.872625			-5.42421	+	OIP1	Thyroid receptor-interacting protein 6 OS=Homo sapiens OX=9606 GN=TRIP6 PE=1 SV=3	0	82.937	43	13	247	13	476	50.3	7.37	90.17	13	0	1.70665	1.70031	2.11688	1.03215	1.43961	1.43124	2.75095	2.83552	2.55525
Q9NVI7	ATAD3A	1.01526	0.0930483	0.807145	0.908073	0.0218554			0.260769			ATPase family AAA domain-containing protein 3A OS=Homo sapiens OX=9606 GN=ATAD3A PE=1 SV=2	0	82.651	30	18	551	9	634	71.3	8.98	269.21	18	8	4.84066	4.72153	4.79571	3.55385	3.19993	3.90766	4.89766	4.63348	4.76119
Q15029	EFTUD2	1.24105	1.56736	0.0270794	0.116493	0.311566			3.40791		KIAA0031 SNRP116	116 kDa U5 small nuclear ribonucleoprotein component OS=Homo sapiens OX=9606 GN=EFTUD2 PE=1 SV=1	0	82.477	30	20	385	20	972	109.4	5	148.54	20	0	2.89815	3.0262	3.06521	3.1257	2.9553	3.01479	2.82871	2.56906	2.65709
P23246	SFPQ	1.42779	1.93695	0.0115625	0.103498	0.513789			4.41424		PSF	Splicing factor, proline- and glutamine-rich OS=Homo sapiens OX=9606 GN=SFPQ PE=1 SV=2	0	82.468	30	15	467	14	707	76.1	9.44	163.72	15	1	5.03413	5.31097	5.18385	4.31794	4.29162	4.44063	4.78228	4.49928	4.70601
Q10567	AP1B1	1.05454	0.227252	0.592581	0.798949	0.0766135			0.580711		ADTB1 BAM22 CLAPB2	AP-1 complex subunit beta-1 OS=Homo sapiens OX=9606 GN=AP1B1 PE=1 SV=3	0	82.396	24	18	261	7	949	104.5	5.06	103	18	0	-2.30503	-2.59686	-2.17912	-2.82492	-2.20438	-2.41723	-2.46118	-2.34831	-2.50137
P12814	ACTN1	1.15693	0.650678	0.223523	0.421525	0.210296			1.43911			Alpha-actinin-1 OS=Homo sapiens OX=9606 GN=ACTN1 PE=1 SV=2	0	82.23	24	19	485	8	892	103	5.41	251.37	19	0	-0.01082	0.41775	0.36317	-0.00636468	0.349709	0.337555	0.11637	-0.065845	0.088687
Q9Y2W1	THRAP3	1.19075	1.94967	0.0112286	0.105	0.251868			4.45209		BCLAF2 TRAP150	Thyroid hormone receptor-associated protein 3 OS=Homo sapiens OX=9606 GN=THRAP3 PE=1 SV=2	0	82.049	18	18	378	17	955	108.6	10.15	185.95	18	0	2.09888	1.93597	2.05905	2.49284	2.23609	2.16359	1.74376	1.83514	1.75939
O00443	PIK3C2A	1.1615	0.631898	0.233401	0.433566	0.215987			1.40253			Phosphatidylinositol 4-phosphate 3-kinase C2 domain-containing subunit alpha OS=Homo sapiens OX=9606 GN=PIK3C2A PE=1 SV=2	0	82.007	17	24	240	24	1686	190.6	8.02	82.18	24	0	0.860926	0.731621	1.05585	0.52713	1.11354	1.0591	0.796023	0.423367	0.781048
P50454	SERPINH1	0.99141	0.0409268	0.910067	0.95773	-0.0124464			-0.120272		CBP1 CBP2 HSP47 SERPINH2	Serpin H1 OS=Homo sapiens OX=9606 GN=SERPINH1 PE=1 SV=2	0	81.864	42	15	367	15	418	46.4	8.69	137.07	15	0	4.09787	4.28964	3.95476	4.69013	4.78049	4.71359	4.18604	4.13198	4.06158
Q5T9A4	ATAD3B	0.962247	0.223928	0.597134	0.801045	-0.0555211			-0.573298		KIAA1273 TOB3	ATPase family AAA domain-containing protein 3B OS=Homo sapiens OX=9606 GN=ATAD3B PE=1 SV=1	0	81.833	26	16	556	7	648	72.5	9.2	251.69	16	0	1.89685	2.17166	2.11065	0.466108	0.629407	0.847346	2.14726	2.01835	2.18011
Q08378	GOLGA3	0.610832	1.51629	0.0304587	0.11777	-0.711153			-3.28147			Golgin subfamily A member 3 OS=Homo sapiens OX=9606 GN=GOLGA3 PE=1 SV=2	0	81.784	17	21	83	21	1498	167.3	5.44	28.21	21	0	1.73188	1.3021	1.63662	1.93677	2.04404	1.91933	2.61347	2.07407	2.11653
P50570	DNM2	3.60859	3.07209	0.000847048	0.0803529	1.85144			8.9911	+	DYN2	Dynamin-2 OS=Homo sapiens OX=9606 GN=DNM2 PE=1 SV=2	0	81.51	28	21	294	16	870	98	7.44	102.35	21	3	2.64383	2.99365	2.73848	2.70721	2.9708	2.93643	0.990046	0.611458	1.22016
Q1KMD3	HNRNPUL2	0.692585	1.79812	0.0159175	0.104157	-0.529937			-4.01597		HNRPUL2	Heterogeneous nuclear ribonucleoprotein U-like protein 2 OS=Homo sapiens OX=9606 GN=HNRNPUL2 PE=1 SV=1	0	81.442	25	18	274	18	747	85.1	4.91	113.48	18	0	2.05309	2.06476	2.30851	2.27866	2.24107	2.29133	2.48703	2.84048	2.68867
P35606	COPB2	1.02559	0.0951129	0.803317	0.906107	0.0364583			0.266097			Coatomer subunit beta' OS=Homo sapiens OX=9606 GN=COPB2 PE=1 SV=2	0	81.073	24	17	319	17	906	102.4	5.27	141.86	17	0	2.74259	2.83311	2.73007	3.17022	3.28695	3.24252	2.87859	2.46637	2.85143
Q9UPN4	CEP131	0.893566	0.319961	0.478673	0.701425	-0.162355			-0.780558		AZI1 KIAA1118	Centrosomal protein of 131 kDa OS=Homo sapiens OX=9606 GN=CEP131 PE=1 SV=3	0	81.014	25	24	124	24	1083	122.1	8.69	36.15	24	0	0.167826	0.505201	-0.162389	-0.568389	-0.442708	0.00544758	0.421613	0.399486	0.176602
P30101	PDIA3	1.06249	0.223565	0.597633	0.801025	0.0874449			0.572487		ERP57 ERP60 GRP58	Protein disulfide-isomerase A3 OS=Homo sapiens OX=9606 GN=PDIA3 PE=1 SV=4	0	80.521	34	16	293	16	505	56.7	6.35	131.03	16	0	2.54564	2.89363	2.48964	3.70707	3.42585	3.70515	2.57769	2.39707	2.69182
P02533	KRT14	0.943139	0.0817047	0.828505	0.922415	-0.0844575			-0.231199			Keratin, type I cytoskeletal 14 OS=Homo sapiens OX=9606 GN=KRT14 PE=1 SV=4	0	80.477	35	18	375	4	472	51.5	5.16	174.58	18	8	2.32765	2.03041	2.87733	-2.59564	-4.32001	-1.83897	2.06187	2.98583	2.44107
Q9Y490	TLN1	1.06971	0.0635974	0.863779	0.938605	0.0972158			0.182892		KIAA1027 TLN	Talin-1 OS=Homo sapiens OX=9606 GN=TLN1 PE=1 SV=3	0	80.249	11	21	138	21	2541	269.6	6.07	38.9	21	0	-2.10882	-0.51874	-0.655126	-1.10301	-0.553545	-0.367817	-0.989558	-1.4933	-1.09147
Q96AQ6	PBXIP1	1.21239	0.516417	0.304497	0.535452	0.277857			1.17687		HPIP	Pre-B-cell leukemia transcription factor-interacting protein 1 OS=Homo sapiens OX=9606 GN=PBXIP1 PE=1 SV=1	0	80.225	29	19	260	19	731	80.6	5.33	112.11	19	0	2.0704	1.32414	1.43705	2.72253	2.6169	2.79769	1.30785	1.27462	1.41555
P78332	RBM6	0.848553	0.29618	0.505615	0.722492	-0.236924			-0.730416		DEF3	RNA-binding protein 6 OS=Homo sapiens OX=9606 GN=RBM6 PE=1 SV=5	0	79.852	23	21	262	20	1123	128.6	6.32	86.62	21	1	0.346813	0.403229	0.971144	0.50104	0.313382	0.675738	0.59821	1.32004	0.513703
P33993	MCM7	0.834076	2.61739	0.00241327	0.0776111	-0.261749			-6.82248		CDC47 MCM2	DNA replication licensing factor MCM7 OS=Homo sapiens OX=9606 GN=MCM7 PE=1 SV=4	0	79.778	32	19	410	19	719	81.3	6.46	178.46	19	0	2.59851	2.58081	2.63722	2.74001	2.78096	2.68103	2.86861	2.80674	2.92644
Q9Y5B9	SUPT16H	1.26483	0.683188	0.207401	0.403039	0.338939			1.50244		FACT140 FACTP140	FACT complex subunit SPT16 OS=Homo sapiens OX=9606 GN=SUPT16H PE=1 SV=1	0	79.589	25	21	307	21	1047	119.8	5.66	129.03	21	0	3.75971	3.76917	3.7407	3.53923	3.09478	3.21509	3.72914	2.97956	3.54407
Q14C86	GAPVD1	1.28467	0.985439	0.10341	0.241947	0.361403			2.10208		GAPEX5 KIAA1521 RAP6	GTPase-activating protein and VPS9 domain-containing protein 1 OS=Homo sapiens OX=9606 GN=GAPVD1 PE=1 SV=2	0	79.543	18	20	276	20	1478	164.9	5.22	111.96	20	0	1.88967	2.02712	1.95131	2.14999	2.21835	2.09855	1.53008	1.91118	1.34264
Q9P0K7	RAI14	0.994821	0.0138005	0.968723	0.982529	-0.00749119			-0.0417182		KIAA1334 NORPEG	Ankycorbin OS=Homo sapiens OX=9606 GN=RAI14 PE=1 SV=2	0	79.507	23	18	223	18	980	110	6.21	84.74	18	0	2.11851	2.65547	2.23479	0.963855	1.05168	1.02895	2.3133	2.23155	2.48638
P57678	GEMIN4	0.907089	0.46468	0.34302	0.579366	-0.140684			-1.07469			Gem-associated protein 4 OS=Homo sapiens OX=9606 GN=GEMIN4 PE=1 SV=2	0	79.354	20	19	333	19	1058	120	6.04	139.93	19	0	2.19339	2.01489	2.32023	1.43967	1.72411	1.91474	2.4899	2.30397	2.15669
Q9UHB9	SRP68	1.09682	0.336208	0.461097	0.684073	0.133325			0.814448			Signal recognition particle subunit SRP68 OS=Homo sapiens OX=9606 GN=SRP68 PE=1 SV=2	0	79.315	31	20	302	20	627	70.7	8.56	132.74	20	0	2.63648	2.82328	2.72004	2.09211	1.9027	2.16013	2.79902	2.29068	2.69011
Q9Y678	COPG1	0.946182	0.248501	0.564286	0.770356	-0.0798109			-0.627645		COPG	Coatomer subunit gamma-1 OS=Homo sapiens OX=9606 GN=COPG1 PE=1 SV=1	0	79.21	30	17	338	17	874	97.7	5.47	132.96	17	0	2.84791	2.90459	2.49958	2.9985	3.03955	3.14741	2.85237	2.82695	2.8122
O76094	SRP72	1.18722	0.638957	0.229637	0.430196	0.247585			1.41628			Signal recognition particle subunit SRP72 OS=Homo sapiens OX=9606 GN=SRP72 PE=1 SV=3	0	79.084	38	18	278	18	671	74.6	9.26	115.2	18	0	2.77144	2.92079	2.65885	2.19161	2.45599	2.3456	2.744	2.22722	2.6371
P09651	HNRNPA1	1.21029	0.59839	0.252122	0.459641	0.275348			1.33724		HNRPA1	Heterogeneous nuclear ribonucleoprotein A1 OS=Homo sapiens OX=9606 GN=HNRNPA1 PE=1 SV=5	0	78.996	50	15	341	14	372	38.7	9.13	141.9	15	1	4.30379	4.31761	4.30446	3.3529	3.1888	3.2191	4.40813	3.69839	3.99328
O15230	LAMA5	0.873464	0.535586	0.291349	0.514862	-0.19518			-1.2145		KIAA0533 KIAA1907	Laminin subunit alpha-5 OS=Homo sapiens OX=9606 GN=LAMA5 PE=1 SV=8	0	78.903	7	20	169	20	3695	399.5	7.02	55.56	20	0	0.828022	0.484935	0.362135	1.17712	1.37443	1.26359	0.854797	0.595749	0.810086
P18124	RPL7	1.06877	0.193265	0.640818	0.829913	0.0959541			0.503901			Large ribosomal subunit protein uL30 OS=Homo sapiens OX=9606 GN=RPL7 PE=1 SV=1	0	78.83	48	13	645	13	248	29.2	10.65	331.23	13	0	5.76309	5.59471	5.47758	5.49628	5.43493	5.38765	5.77198	5.19034	5.5852
Q86VP1	TAX1BP1	0.962709	0.157998	0.695027	0.857217	-0.054829			-0.421541		T6BP	Tax1-binding protein 1 OS=Homo sapiens OX=9606 GN=TAX1BP1 PE=1 SV=2	0	78.636	24	20	402	20	789	90.8	5.43	199.45	20	0	3.30037	3.33644	3.16139	3.48952	3.32236	3.63789	3.51495	3.10569	3.34205
P62917	RPL8	1.12809	0.234981	0.582129	0.790031	0.173884			0.597871			Large ribosomal subunit protein uL2 OS=Homo sapiens OX=9606 GN=RPL8 PE=1 SV=2	0	78.534	37	15	896	15	257	28	11.03	443.25	15	0	6.54322	6.39554	6.26111	6.35952	5.92922	6.33631	6.7015	5.73473	6.24199
P39023	RPL3	0.937259	0.192908	0.641346	0.830078	-0.0934798			-0.503081			Large ribosomal subunit protein uL3 OS=Homo sapiens OX=9606 GN=RPL3 PE=1 SV=2	0	78.528	35	14	515	14	403	46.1	10.18	219.95	14	0	5.74079	5.73961	5.62353	5.69745	5.39886	5.35924	6.04861	5.44266	5.89309
Q9UKK3	PARP4	0.529329	2.00649	0.00985158	0.11	-0.917762			-4.62398	+	ADPRTL1 KIAA0177 PARPL	Protein mono-ADP-ribosyltransferase PARP4 OS=Homo sapiens OX=9606 GN=PARP4 PE=1 SV=3	0	78.414	14	20	269	20	1724	192.5	5.66	100.28	20	0	1.22665	1.00858	1.54987	1.39438	1.42693	1.20553	2.08161	2.4203	2.03649
Q8N1F7	NUP93	1.3447	0.821705	0.150763	0.321234	0.427287			1.77384		KIAA0095	Nuclear pore complex protein Nup93 OS=Homo sapiens OX=9606 GN=NUP93 PE=1 SV=2	0	78.404	33	22	439	22	819	93.4	5.72	196.7	22	0	4.05985	3.72455	3.76172	4.35298	4.08794	4.34177	3.81893	3.07509	3.37023
Q9NRH3	TUBG2	0.831704	2.02491	0.00944266	0.111032	-0.265857			-4.68072			Tubulin gamma-2 chain OS=Homo sapiens OX=9606 GN=TUBG2 PE=2 SV=1	0	78.398	40	16	309	16	451	51.1	5.8	102.09	16	0	2.82365	2.76855	2.74599	2.67496	2.52506	2.54136	3.13857	2.95921	3.03797
P46781	RPS9	1.14255	0.452019	0.353167	0.591283	0.192262			1.04951			Small ribosomal subunit protein uS4 OS=Homo sapiens OX=9606 GN=RPS9 PE=1 SV=3	0	78.379	59	16	1332	16	194	22.6	10.65	704.99	16	0	7.3773	7.17147	7.17216	7.0258	6.80879	7.07103	7.33641	6.74817	7.05957
Q9Y608	LRRFIP2	1.35532	0.561714	0.274338	0.493567	0.438638			1.26565			Leucine-rich repeat flightless-interacting protein 2 OS=Homo sapiens OX=9606 GN=LRRFIP2 PE=1 SV=1	0	78.357	22	16	354	16	721	82.1	6.95	176.13	16	0	4.07715	4.06231	3.86585	4.34847	4.13359	4.35741	4.02972	2.90188	3.75779
P52597	HNRNPF	0.63634	1.93372	0.0116489	0.102513	-0.652131			-4.40466		HNRPF	Heterogeneous nuclear ribonucleoprotein F OS=Homo sapiens OX=9606 GN=HNRNPF PE=1 SV=3	0	77.843	31	9	747	7	415	45.6	5.58	319.88	9	0	5.15135	5.19572	5.39919	5.28114	5.39792	5.23792	5.68479	6.12414	5.89372
Q6PEY2	TUBA3E	0.783195	1.45947	0.0347162	0.128048	-0.352557			-3.14393			Tubulin alpha-3E chain OS=Homo sapiens OX=9606 GN=TUBA3E PE=1 SV=2	0	77.81	32	11	821	0	450	49.8	5.14	420.55	11	0	7.37618	7.28295	7.34422	7.38987	7.32447	7.54657	7.88832	7.51503	7.65767
Q09666	AHNAK	1.2398	1.54823	0.028299	0.117907	0.310106			3.36022		PM227	Neuroblast differentiation-associated protein AHNAK OS=Homo sapiens OX=9606 GN=AHNAK PE=1 SV=2	0	77.749	8	21	177	21	5890	628.7	6.15	61.5	21	0	1.74928	1.73663	1.88936	0.3053	0.452424	0.755833	1.53748	1.32713	1.58034
Q13772	NCOA4	0.952724	0.334645	0.462759	0.68554	-0.0698694			-0.811199		ARA70 ELE1 RFG	Nuclear receptor coactivator 4 OS=Homo sapiens OX=9606 GN=NCOA4 PE=1 SV=1	0	77.591	32	14	359	14	614	69.7	6.01	185.36	14	0	3.83147	3.87225	3.72987	3.82635	3.77168	3.90387	3.90684	3.74019	3.99617
P62906	RPL10A	1.19919	0.477837	0.332784	0.567608	0.262059			1.10077		NEDD6	Large ribosomal subunit protein uL1 OS=Homo sapiens OX=9606 GN=RPL10A PE=1 SV=2	0	77.578	47	13	780	13	217	24.8	9.94	340.53	13	0	7.10454	6.79781	6.84725	6.63146	6.46814	6.63247	6.92159	6.22193	6.81991
O75676	RPS6KA4	1.22931	0.838768	0.144955	0.310063	0.297855			1.80758		MSK2	Ribosomal protein S6 kinase alpha-4 OS=Homo sapiens OX=9606 GN=RPS6KA4 PE=1 SV=1	0	77.369	27	17	201	17	772	85.6	8.28	78.29	17	0	1.63025	1.78766	1.46112	0.579502	1.08103	1.03013	1.3887	1.07019	1.52657
O43823	AKAP8	0.604448	1.80034	0.0158365	0.104845	-0.72631			-4.02213		AKAP95	A-kinase anchor protein 8 OS=Homo sapiens OX=9606 GN=AKAP8 PE=1 SV=1	0	77.328	33	18	333	18	692	76.1	5.15	132.72	18	0	2.9605	2.81874	3.21038	3.40122	3.21257	3.69499	3.84656	3.87785	3.44413
P49588	AARS1	1.1865	0.698245	0.200334	0.393059	0.246715			1.53179		AARS	Alanine--tRNA ligase, cytoplasmic OS=Homo sapiens OX=9606 GN=AARS1 PE=1 SV=2	0	77.068	23	17	341	17	968	106.7	5.53	175.59	17	0	3.41276	3.62461	3.32317	3.14354	3.0907	3.29108	3.38689	2.94488	3.28862
O15269	SPTLC1	1.03004	0.0686303	0.853827	0.934465	0.0426942			0.196462		LCB1	Serine palmitoyltransferase 1 OS=Homo sapiens OX=9606 GN=SPTLC1 PE=1 SV=1	0	77.008	44	17	419	17	473	52.7	6.01	226.49	17	0	4.14256	3.93298	3.87313	3.66878	3.825	3.45029	4.27639	3.58003	3.96416
Q15021	NCAPD2	1.35563	1.07672	0.0838061	0.209754	0.438961			2.29055		CAPD2 CNAP1 KIAA0159	Condensin complex subunit 1 OS=Homo sapiens OX=9606 GN=NCAPD2 PE=1 SV=3	0	76.886	19	20	210	20	1401	157.1	6.61	73.43	20	0	2.1315	1.86728	2.17102	2.04971	1.75048	1.48028	1.85257	1.29643	1.70391
P10809	HSPD1	1.10027	0.178446	0.663062	0.845406	0.137854			0.469652		HSP60	60 kDa heat shock protein, mitochondrial OS=Homo sapiens OX=9606 GN=HSPD1 PE=1 SV=2	0	76.697	35	17	306	17	573	61	5.87	104.47	17	0	2.34945	3.12834	3.07803	2.42474	2.62601	2.6347	2.41635	2.81848	2.90742
P08651	NFIC	0.714354	1.52136	0.0301049	0.118022	-0.485289			-3.29391		NFI	Nuclear factor 1 C-type OS=Homo sapiens OX=9606 GN=NFIC PE=1 SV=2	0	76.66	44	17	248	14	508	55.6	8.38	103.34	17	3	3.3881	3.07635	3.48244	2.70522	2.52382	2.55038	3.70195	3.96268	3.73813
O00567	NOP56	1.14121	0.682433	0.207762	0.402781	0.19056			1.50097		NOL5A	Nucleolar protein 56 OS=Homo sapiens OX=9606 GN=NOP56 PE=1 SV=4	0	76.634	36	19	280	19	594	66	9.19	117.4	19	0	3.0131	2.8152	2.92283	2.26924	2.31642	2.28957	2.91555	2.52365	2.74023
Q9P2J5	LARS1	0.694026	3.61186	0.000244423	0.0512727	-0.526938			-12.3834	+	KIAA1352 LARS	Leucine--tRNA ligase, cytoplasmic OS=Homo sapiens OX=9606 GN=LARS1 PE=1 SV=2	0	76.572	18	19	277	19	1176	134.4	7.3	133.82	19	0	3.0735	3.0323	3.14456	2.71995	2.72022	2.76933	3.63856	3.63645	3.55615
P01130	LDLR	1.04168	0.152777	0.703434	0.862239	0.0589176			0.409084			Low-density lipoprotein receptor OS=Homo sapiens OX=9606 GN=LDLR PE=1 SV=1	0	76.448	33	18	300	18	860	95.3	5.05	127.52	18	0	2.41497	1.98309	2.32029	2.51155	2.6023	2.58678	2.29509	2.09401	2.1525
P62495	ETF1	0.723123	1.41374	0.0385707	0.136809	-0.467686			-3.03553		ERF1 RF1 SUP45L1	Eukaryotic peptide chain release factor subunit 1 OS=Homo sapiens OX=9606 GN=ETF1 PE=1 SV=3	0	76.437	48	17	247	17	437	49	5.71	107.97	17	0	3.21206	3.29287	3.63527	2.99612	3.24226	3.14592	3.71157	3.99846	3.83324
O95714	HERC2	0.836036	0.946601	0.113083	0.258783	-0.258364			-2.02321			E3 ubiquitin-protein ligase HERC2 OS=Homo sapiens OX=9606 GN=HERC2 PE=1 SV=2	0	76.387	6	23	163	23	4834	526.9	6.28	43.65	23	0	-0.988383	-1.07605	-1.16725	-1.5058	-0.941654	-2.49079	-0.897004	-0.589152	-0.970429
Q14258	TRIM25	0.984449	0.12864	0.743636	0.883386	-0.0226111			-0.35051		EFP RNF147 ZNF147	E3 ubiquitin/ISG15 ligase TRIM25 OS=Homo sapiens OX=9606 GN=TRIM25 PE=1 SV=2	0	76.187	30	16	320	16	630	70.9	8.09	118.56	16	0	3.34704	3.28775	3.41669	2.1317	2.41818	2.37908	3.38591	3.27617	3.45724
O94906	PRPF6	1.41143	0.662987	0.217276	0.416232	0.497159			1.46308		C20orf14	Pre-mRNA-processing factor 6 OS=Homo sapiens OX=9606 GN=PRPF6 PE=1 SV=1	0	76.045	21	18	365	18	941	106.9	8.25	171.51	18	0	2.60142	2.50752	2.56517	2.31745	1.99016	2.36453	2.47124	1.38895	2.32246
Q8WXH0	SYNE2	0.695946	1.21068	0.0615627	0.174109	-0.522952			-2.57637		KIAA1011 NUA	Nesprin-2 OS=Homo sapiens OX=9606 GN=SYNE2 PE=1 SV=3	0	75.931	5	24	197	24	6885	795.9	5.36	58.64	24	0	0.0774593	0.36029	0.595093	0.662275	0.759583	0.647523	0.593022	1.00983	0.998845
P51532	SMARCA4	0.880889	0.358739	0.437785	0.665207	-0.182968			-0.861008		BAF190A BRG1 SNF2B SNF2L4	Transcription activator BRG1 OS=Homo sapiens OX=9606 GN=SMARCA4 PE=1 SV=2	0	75.719	14	20	224	20	1647	184.5	7.88	92.12	20	0	1.02961	0.580346	0.832082	-0.264753	-0.0590379	0.0934492	1.22852	0.670117	1.09231
Q14160	SCRIB	0.582698	2.53125	0.00294274	0.0909398	-0.77918			-6.46839	+	CRIB1 KIAA0147 LAP4 SCRB1 VARTUL	Protein scribble homolog OS=Homo sapiens OX=9606 GN=SCRIB PE=1 SV=5	0	75.38	16	19	223	19	1630	174.8	5.07	83.14	19	0	1.33666	1.12547	1.4975	1.35195	1.82473	1.43424	2.09734	2.19328	2.00654
O15031	PLXNB2	1.23311	0.357685	0.438849	0.66544	0.302307			0.85884		KIAA0315	Plexin-B2 OS=Homo sapiens OX=9606 GN=PLXNB2 PE=1 SV=3	0	75.279	13	19	243	19	1838	205	6.24	90.86	19	0	1.72709	1.51608	1.4265	2.23385	2.30826	2.42351	1.66722	0.578751	1.51677
Q9UHI6	DDX20	0.960594	0.208831	0.618257	0.816707	-0.0580018			-0.539364		DP103 GEMIN3	Probable ATP-dependent RNA helicase DDX20 OS=Homo sapiens OX=9606 GN=DDX20 PE=1 SV=2	0	75.076	25	15	230	15	824	92.2	6.95	87.19	15	0	2.80623	2.63865	2.59119	1.80043	1.71935	1.76845	2.90595	2.631	2.67313
O76021	RSL1D1	1.42938	1.89825	0.0126402	0.103467	0.515387			4.30054		CATX11 CSIG PBK1	Ribosomal L1 domain-containing protein 1 OS=Homo sapiens OX=9606 GN=RSL1D1 PE=1 SV=3	0	75.054	35	18	357	18	490	54.9	10.13	158	18	0	3.03601	2.99418	2.81009	3.16042	2.86765	2.94333	2.4666	2.2473	2.58022
Q96I24	FUBP3	0.974439	0.138746	0.726531	0.874499	-0.0373565			-0.375241		FBP3	Far upstream element-binding protein 3 OS=Homo sapiens OX=9606 GN=FUBP3 PE=1 SV=2	0	75.053	40	17	217	16	572	61.6	8.38	84.2	17	0	2.67066	2.71179	2.97338	2.33242	2.04091	2.03922	2.87532	2.82259	2.76999
Q9UPQ9	TNRC6B	0.513223	1.48099	0.0330376	0.125625	-0.962342			-3.19565		KIAA1093	Trinucleotide repeat-containing gene 6B protein OS=Homo sapiens OX=9606 GN=TNRC6B PE=1 SV=4	0	74.963	13	17	132	17	1833	193.9	6.76	48.99	17	0	0.823612	0.558638	1.40851	-0.373558	-0.0499912	0.196591	1.75164	2.22395	1.70219
Q8NE71	ABCF1	1.07296	0.434576	0.367641	0.603958	0.10159			1.01469		ABC50	ATP-binding cassette sub-family F member 1 OS=Homo sapiens OX=9606 GN=ABCF1 PE=1 SV=2	0	74.823	27	19	321	18	845	95.9	6.8	146.37	19	0	2.88958	2.89689	2.73945	2.76869	2.84095	2.58875	2.82449	2.56845	2.82822
P30291	WEE1	0.621435	2.3386	0.00458563	0.0885263	-0.686325			-5.73262	+		Wee1-like protein kinase OS=Homo sapiens OX=9606 GN=WEE1 PE=1 SV=2	0	74.6	26	14	257	14	646	71.6	6.77	91.51	14	0	2.83238	2.84177	3.03339	1.13093	1.40224	1.00395	3.46824	3.78779	3.51048
P09543	CNP	1.3022	0.798147	0.159167	0.330898	0.380956			1.72739			2',3'-cyclic-nucleotide 3'-phosphodiesterase OS=Homo sapiens OX=9606 GN=CNP PE=1 SV=2	0	74.585	46	18	202	18	421	47.5	9.07	76.32	18	0	2.94135	3.02306	2.58239	3.32362	3.19365	3.37746	2.73337	2.14	2.53056
P39019	RPS19	1.18144	0.571541	0.2682	0.481714	0.240552			1.28485			Small ribosomal subunit protein eS19 OS=Homo sapiens OX=9606 GN=RPS19 PE=1 SV=2	0	74.116	63	14	799	14	145	16.1	10.32	380.88	14	0	6.51981	6.42372	6.34527	6.02811	5.78325	5.98383	6.51369	5.89083	6.16263
Q8WX93	PALLD	0.53376	1.79743	0.0159432	0.103817	-0.905736			-4.01403	+	KIAA0992	Palladin OS=Homo sapiens OX=9606 GN=PALLD PE=1 SV=3	0	74.1	12	18	224	18	1383	150.5	7.09	90.71	18	0	0.978231	0.955344	1.21079	0.53336	0.890205	0.726655	1.72912	2.37426	1.7582
A5A3E0	POTEF	0.966476	0.0460971	0.899296	0.953565	-0.049194			-0.134779		A26C1B	POTE ankyrin domain family member F OS=Homo sapiens OX=9606 GN=POTEF PE=1 SV=2	0	73.849	6	6	1634	0	1075	121.4	6.2	806.3	6	0	9.94308	9.7839	9.68506	10.3614	9.94535	10.5195	10.4113	9.18797	9.9604
Q9H6S0	YTHDC2	1.16772	0.678155	0.209819	0.405544	0.223689			1.49263			3'-5' RNA helicase YTHDC2 OS=Homo sapiens OX=9606 GN=YTHDC2 PE=1 SV=2	0	73.683	17	20	288	20	1430	160.1	8.4	101.43	20	0	2.09295	1.97164	2.27861	1.65709	1.8509	1.82559	2.13061	1.75316	1.78836
P04843	RPN1	1.04193	0.222462	0.599154	0.802116	0.0592628			0.57002			Dolichyl-diphosphooligosaccharide--protein glycosyltransferase subunit 1 OS=Homo sapiens OX=9606 GN=RPN1 PE=1 SV=1	0	73.368	38	17	412	17	607	68.5	6.38	185.35	17	0	3.5234	3.51986	3.49191	4.30723	4.22314	4.42136	3.52257	3.24876	3.58606
P17812	CTPS1	0.959618	0.290984	0.5117	0.727034	-0.0594674			-0.71937		CTPS	CTP synthase 1 OS=Homo sapiens OX=9606 GN=CTPS1 PE=1 SV=2	0	73.226	29	17	334	15	591	66.6	6.46	154.47	17	2	3.08319	3.29519	3.26868	3.38213	3.54532	3.56342	3.30947	3.17878	3.33722
Q14694	USP10	1.04397	0.352831	0.443781	0.670181	0.0620842			0.848846		KIAA0190	Ubiquitin carboxyl-terminal hydrolase 10 OS=Homo sapiens OX=9606 GN=USP10 PE=1 SV=2	0	73.136	27	14	334	14	798	87.1	5.31	150.23	14	0	3.65892	3.84354	3.86908	2.70473	2.598	2.57441	3.70457	3.69066	3.79007
P46459	NSF	0.924978	0.250022	0.562313	0.768003	-0.112509			-0.630976			Vesicle-fusing ATPase OS=Homo sapiens OX=9606 GN=NSF PE=1 SV=3	0	72.822	25	17	270	17	744	82.5	6.95	111.47	17	0	2.82331	2.83496	3.04434	3.0608	3.12184	3.04007	3.20664	2.68894	3.14456
P61978	HNRNPK	0.508476	2.2228	0.00598692	0.0897183	-0.975748			-5.32461	+	HNRPK	Heterogeneous nuclear ribonucleoprotein K OS=Homo sapiens OX=9606 GN=HNRNPK PE=1 SV=1	0	72.65	38	16	1265	16	463	50.9	5.54	583.27	16	0	5.96424	5.94731	6.29616	5.95841	6.13886	6.19577	7.02004	7.30562	6.8093
P27797	CALR	1.11747	0.773193	0.16858	0.344422	0.160233			1.67835		CRTC	Calreticulin OS=Homo sapiens OX=9606 GN=CALR PE=1 SV=1	0	72.6	40	13	396	13	417	48.1	4.44	202.24	13	0	3.66545	3.83747	3.8089	4.50732	4.39435	4.49432	3.56593	3.50082	3.76437
Q13283	G3BP1	1.34526	1.06182	0.0867315	0.21522	0.427888			2.25947		G3BP	Ras GTPase-activating protein-binding protein 1 OS=Homo sapiens OX=9606 GN=G3BP1 PE=1 SV=1	0	72.417	52	15	502	14	466	52.1	5.52	196.53	15	1	4.55836	4.76867	4.72009	2.84585	2.69143	2.76731	4.53689	3.92447	4.3021
Q9H089	LSG1	0.721417	1.43644	0.0366065	0.13098	-0.471095			-3.08909			Large subunit GTPase 1 homolog OS=Homo sapiens OX=9606 GN=LSG1 PE=1 SV=2	0	72.407	30	17	351	17	658	75.2	6.38	141.25	17	0	2.91274	2.79725	2.98499	2.19708	2.33218	2.36634	3.18184	3.64873	3.2777
Q9BZF9	UACA	1.05977	0.241133	0.57394	0.781574	0.0837491			0.611458		KIAA1561	Uveal autoantigen with coiled-coil domains and ankyrin repeats OS=Homo sapiens OX=9606 GN=UACA PE=1 SV=2	0	72.267	17	20	226	20	1416	162.4	7.03	96.91	20	0	1.59832	1.87278	1.83464	0.599392	0.881456	0.923064	1.79697	1.47147	1.78607
Q5T1M5	FKBP15	1.03385	0.216348	0.607648	0.808565	0.0480317			0.556314		KIAA0674	FK506-binding protein 15 OS=Homo sapiens OX=9606 GN=FKBP15 PE=1 SV=2	0	72.166	22	16	185	16	1219	133.5	5.2	77.76	16	0	1.12769	1.16178	1.4011	2.07372	1.49853	1.52279	1.17315	1.19683	1.17649
Q16891	IMMT	1.22145	1.05702	0.0876951	0.216432	0.288592			2.24949		HMP MIC60 MINOS2	MICOS complex subunit MIC60 OS=Homo sapiens OX=9606 GN=IMMT PE=1 SV=1	0	72.157	25	16	229	16	758	83.6	6.48	96.87	16	0	1.96303	2.11035	2.0662	2.97229	2.94742	3.22439	1.99921	1.63664	1.63796
Q9Y383	LUC7L2	1.21192	2.51132	0.00308094	0.0857727	0.277295			6.38875			Putative RNA-binding protein Luc7-like 2 OS=Homo sapiens OX=9606 GN=LUC7L2 PE=1 SV=2	0	72.146	33	14	299	8	392	46.5	10.01	129.42	14	5	2.93557	2.89655	2.9541	2.70721	2.49874	2.19705	2.70949	2.66998	2.57486
O00411	POLRMT	1.13148	1.94912	0.0112429	0.104533	0.178205			4.45044			DNA-directed RNA polymerase, mitochondrial OS=Homo sapiens OX=9606 GN=POLRMT PE=1 SV=2	0	72.111	24	17	152	17	1230	138.5	8.98	52.58	17	0	1.32994	1.3369	1.30214	1.51914	1.8496	1.84088	1.22008	1.0923	1.12199
Q86XI2	NCAPG2	1.57172	2.15352	0.00702229	0.0883436	0.652345			5.09187	+	LUZP5	Condensin-2 complex subunit G2 OS=Homo sapiens OX=9606 GN=NCAPG2 PE=1 SV=1	0	71.929	18	19	272	19	1143	130.9	6.87	99.05	19	0	2.33839	2.10804	2.26552	1.27244	0.745212	1.48033	1.70677	1.36834	1.67981
Q06481	APLP2	0.732389	2.24293	0.00571574	0.0888696	-0.449317			-5.39381		APPL2	Amyloid beta precursor like protein 2 OS=Homo sapiens OX=9606 GN=APLP2 PE=1 SV=2	0	71.744	27	17	392	17	763	86.9	4.79	213.38	17	0	3.97324	3.89518	3.99134	4.42422	4.35829	4.29908	4.32309	4.55836	4.32625
P67809	YBX1	0.96891	0.188722	0.647556	0.836312	-0.0455661			-0.493455		NSEP1 YB1	Y-box-binding protein 1 OS=Homo sapiens OX=9606 GN=YBX1 PE=1 SV=3	0	71.713	47	12	249	8	324	35.9	9.88	124.81	12	3	4.63483	4.47908	4.64735	3.8326	3.71488	3.56023	4.77872	4.53147	4.58777
P61247	RPS3A	1.10153	0.366494	0.430037	0.664919	0.139513			0.876927		FTE1 MFTL	Small ribosomal subunit protein eS1 OS=Homo sapiens OX=9606 GN=RPS3A PE=1 SV=2	0	71.691	44	14	444	14	264	29.9	9.73	206.82	14	0	4.22081	3.98113	3.9284	4.08679	3.43905	3.43543	4.10999	3.6602	3.94161
Q9HAW4	CLSPN	0.559724	1.92625	0.011851	0.102639	-0.837214			-4.38259	+		Claspin OS=Homo sapiens OX=9606 GN=CLSPN PE=1 SV=3	0	71.646	15	18	205	18	1339	151	4.82	88.3	18	0	2.45001	2.23948	2.56084	1.44905	1.58791	1.77302	3.10345	3.58585	3.07268
P46939	UTRN	1.517	1.59373	0.0254843	0.114297	0.60122			3.47428		DMDL DRP1	Utrophin OS=Homo sapiens OX=9606 GN=UTRN PE=1 SV=2	0	71.627	8	21	94	21	3433	394.2	5.33	24.14	21	0	-0.328238	-0.216612	-0.0380586	-0.43584	-0.665888	-0.473129	-0.674273	-0.616591	-1.0957
Q15393	SF3B3	1.43054	0.867478	0.135682	0.291503	0.516557			1.86456		KIAA0017 SAP130	Splicing factor 3B subunit 3 OS=Homo sapiens OX=9606 GN=SF3B3 PE=1 SV=4	0	71.598	18	20	323	20	1217	135.5	5.26	136.03	20	0	2.89697	3.22593	2.93818	3.07005	3.02153	2.98599	2.93445	2.0455	2.53147
P48444	ARCN1	0.914941	1.30102	0.0500009	0.161093	-0.128249			-2.77643		COPD	Coatomer subunit delta OS=Homo sapiens OX=9606 GN=ARCN1 PE=1 SV=1	0	71.597	33	16	409	16	511	57.2	6.21	205.15	16	0	3.19565	3.27861	3.32347	3.20449	3.16421	3.31276	3.3611	3.44778	3.3736
P00338	LDHA	1.04899	0.160267	0.691406	0.856346	0.0690051			0.426931			L-lactate dehydrogenase A chain OS=Homo sapiens OX=9606 GN=LDHA PE=1 SV=2	0	71.246	43	15	366	14	332	36.7	8.27	192.74	15	0	3.21141	3.59715	3.58669	3.1415	3.4212	3.50766	3.22032	3.56711	3.40079
P25205	MCM3	1.10187	1.26703	0.0540714	0.166498	0.139951			2.70041			DNA replication licensing factor MCM3 OS=Homo sapiens OX=9606 GN=MCM3 PE=1 SV=3	0	71.227	29	19	279	19	808	90.9	5.77	117.92	19	0	2.03075	2.093	2.06405	1.84008	1.89662	1.80243	1.96313	1.82587	1.97895
P51116	FXR2	1.27299	1.2689	0.0538396	0.166716	0.348221			2.70456		FMR1L2	RNA-binding protein FXR2 OS=Homo sapiens OX=9606 GN=FXR2 PE=1 SV=2	0	71.198	29	15	374	14	673	74.2	6.23	147.8	15	0	2.78976	2.5642	2.9553	1.63565	1.68248	1.82144	2.43371	2.31017	2.52071
Q14444	CAPRIN1	1.30973	1.47862	0.0332184	0.124587	0.389265			3.18993		GPIAP1 GPIP137 M11S1 RNG105	Caprin-1 OS=Homo sapiens OX=9606 GN=CAPRIN1 PE=1 SV=2	0	71.137	24	15	498	15	709	78.3	5.25	224.73	15	0	4.48082	4.58815	4.58352	2.82614	2.9986	3.19884	4.32011	3.9335	4.23108
Q02543	RPL18A	1.12487	0.400213	0.397912	0.630527	0.169755			0.945565			Large ribosomal subunit protein eL20 OS=Homo sapiens OX=9606 GN=RPL18A PE=1 SV=2	0	71.137	47	14	519	14	176	20.7	10.71	273.13	14	0	5.82047	5.64799	5.52081	5.75045	5.49074	5.73504	5.75831	5.21451	5.50718
O14980	XPO1	1.19449	1.86286	0.0137132	0.101212	0.25639			4.19842		CRM1	Exportin-1 OS=Homo sapiens OX=9606 GN=XPO1 PE=1 SV=1	0	70.857	19	15	264	15	1071	123.3	6.06	91.19	15	0	2.17975	2.20639	2.27129	2.49096	2.74032	2.67468	2.02691	1.85397	2.00738
O14617	AP3D1	0.883019	1.15922	0.0693073	0.188017	-0.179483			-2.46514			AP-3 complex subunit delta-1 OS=Homo sapiens OX=9606 GN=AP3D1 PE=1 SV=1	0	70.806	20	16	233	16	1153	130.1	8.48	86.24	16	0	2.59616	2.64772	2.71902	2.59467	2.88754	2.54855	2.74832	2.95788	2.79515
Q9P258	RCC2	1.32386	1.02907	0.0935253	0.225979	0.404754			2.1916		KIAA1470 TD60	Protein RCC2 OS=Homo sapiens OX=9606 GN=RCC2 PE=1 SV=2	0	70.695	38	15	258	15	522	56	8.78	106.38	15	0	3.86498	4.09638	3.97316	0.779616	1.39664	1.28856	3.79205	3.23373	3.69448
Q96GQ7	DDX27	1.08603	0.303174	0.497538	0.714489	0.119062			0.745232		cPERP-F RHLP	Probable ATP-dependent RNA helicase DDX27 OS=Homo sapiens OX=9606 GN=DDX27 PE=1 SV=2	0	70.584	23	18	333	18	796	89.8	9.28	156.26	18	0	3.18715	2.92812	3.06826	3.29759	3.07832	3.1828	3.19809	2.71107	2.91719
P26373	RPL13	1.12252	0.241887	0.572945	0.780605	0.166744			0.613119		BBC1	Large ribosomal subunit protein eL13 OS=Homo sapiens OX=9606 GN=RPL13 PE=1 SV=4	0	70.52	45	14	972	14	211	24.2	11.65	529.14	14	0	7.21494	6.94822	7.01111	6.89468	6.68903	6.96828	7.3218	6.42417	6.92807
Q03169	TNFAIP2	1.01497	0.0552234	0.880596	0.944336	0.021431			0.160054			Tumor necrosis factor alpha-induced protein 2 OS=Homo sapiens OX=9606 GN=TNFAIP2 PE=1 SV=2	0	70.406	30	17	328	17	654	72.6	6.46	131.87	17	0	2.79033	2.69716	2.5566	2.13461	2.30662	2.39341	2.80268	2.43153	2.74558
P46087	NOP2	1.28335	0.719359	0.190827	0.379395	0.359917			1.57299		NOL1 NSUN1	Probable 28S rRNA (cytosine(4447)-C(5))-methyltransferase OS=Homo sapiens OX=9606 GN=NOP2 PE=1 SV=2	0	70.327	26	18	287	18	812	89.2	9.23	126.13	18	0	2.76115	2.49405	2.31319	2.69906	2.6454	2.63967	2.48427	1.83246	2.17191
Q96RQ3	MCCC1	0.990089	0.111489	0.77359	0.890176	-0.0143694			-0.307808		MCCA	Methylcrotonoyl-CoA carboxylase subunit alpha, mitochondrial OS=Homo sapiens OX=9606 GN=MCCC1 PE=1 SV=3	0	70.304	28	14	290	14	725	80.4	7.78	125.17	14	0	2.85537	2.89941	2.75973	3.41585	3.44188	3.43295	2.81171	2.88666	2.85925
Q6P1N0	CC2D1A	1.60138	2.20831	0.00618998	0.089958	0.679317			5.27527	+	AKI1	Coiled-coil and C2 domain-containing protein 1A OS=Homo sapiens OX=9606 GN=CC2D1A PE=1 SV=1	0	69.679	24	17	316	17	951	104	8.09	149.91	17	0	2.63865	2.53144	2.92586	2.45669	2.57865	2.59053	2.12049	1.94679	1.99074
Q7L576	CYFIP1	1.45206	2.26724	0.0054046	0.0901212	0.538099			5.47832	+	KIAA0068	Cytoplasmic FMR1-interacting protein 1 OS=Homo sapiens OX=9606 GN=CYFIP1 PE=1 SV=1	0	69.546	15	17	222	11	1253	145.1	6.9	93.47	17	4	1.91545	1.97041	2.00554	1.82499	1.92666	1.71486	1.60519	1.2838	1.38812
P30153	PPP2R1A	1.39416	0.773284	0.168545	0.344716	0.479396			1.67853			Serine/threonine-protein phosphatase 2A 65 kDa regulatory subunit A alpha isoform OS=Homo sapiens OX=9606 GN=PPP2R1A PE=1 SV=4	0	69.482	29	14	254	10	589	65.3	5.11	89.62	14	3	3.19054	3.3568	2.77532	3.06476	3.10112	3.42317	2.74153	2.19019	2.95276
P42345	MTOR	1.31255	1.63832	0.0229974	0.112292	0.39237			3.58826		FRAP FRAP1 FRAP2 RAFT1 RAPT1	Serine/threonine-protein kinase mTOR OS=Homo sapiens OX=9606 GN=MTOR PE=1 SV=1	0	69.33	10	18	204	18	2549	288.7	7.17	63.81	18	0	0.548351	0.757427	0.635965	0.990664	0.676908	0.924567	0.13171	0.200401	0.432521
P08779	KRT16	1.92082	0.449993	0.354819	0.591755	0.941725			1.04547		KRT16A	Keratin, type I cytoskeletal 16 OS=Homo sapiens OX=9606 GN=KRT16 PE=1 SV=4	0	69.077	30	16	333	4	473	51.2	5.05	154.29	16	0	-0.285139	-1.0381	-0.306645	-2.07616	-3.92226	-5.16617	-3.12996	-0.192425	-1.13268
Q96SN8	CDK5RAP2	0.333117	1.22524	0.059533	0.170733	-1.5859			-2.60819		CEP215 KIAA1633	CDK5 regulatory subunit-associated protein 2 OS=Homo sapiens OX=9606 GN=CDK5RAP2 PE=1 SV=5	0	69.031	12	20	94	18	1893	214.9	5.58	31.26	20	2	0.266914	0.182313	-1.25109	0.200351	0.034272	-0.913535	1.48386	1.83681	0.635164
P22102	GART	0.97908	0.0595466	0.871873	0.940137	-0.030502			-0.171885		PGFT PRGS	Trifunctional purine biosynthetic protein adenosine-3 OS=Homo sapiens OX=9606 GN=GART PE=1 SV=1	0	68.933	23	18	314	18	1010	107.7	6.7	141.6	18	0	2.55365	2.74823	2.31893	2.70899	2.61648	2.70925	2.7962	2.55881	2.35731
Q99832	CCT7	1.22584	1.86565	0.0136253	0.102332	0.293766			4.20642		CCTH NIP7-1	T-complex protein 1 subunit eta OS=Homo sapiens OX=9606 GN=CCT7 PE=1 SV=2	0	68.507	37	16	274	16	543	59.3	7.65	117.84	16	0	2.83141	2.8797	2.88248	2.62269	2.50004	2.45596	2.62048	2.43657	2.65524
P26599	PTBP1	2.23536	2.47682	0.00333563	0.0831064	1.16051			6.2529	+	PTB	Polypyrimidine tract-binding protein 1 OS=Homo sapiens OX=9606 GN=PTBP1 PE=1 SV=2	0	68.369	33	12	401	11	557	59.6	9.16	175.34	12	1	5.04059	5.01465	4.91949	4.07806	4.5412	3.99302	4.04574	3.46936	3.97811
Q96F86	EDC3	4.13395	3.97666	0.00010552	0.0525714	2.04752	+	C33A_C-IgG	15.3338	+	LSM16 YJDC YJEFN2	Enhancer of mRNA-decapping protein 3 OS=Homo sapiens OX=9606 GN=EDC3 PE=1 SV=1	0	68.331	44	16	243	16	508	56	7.11	107.91	16	0	3.47813	3.24517	3.29329	3.21162	3.41023	3.0751	1.49871	1.10946	1.26586
P33991	MCM4	0.684329	1.8743	0.0133567	0.101414	-0.547238			-4.23125		CDC21	DNA replication licensing factor MCM4 OS=Homo sapiens OX=9606 GN=MCM4 PE=1 SV=5	0	68.043	23	14	236	14	863	96.5	6.74	91.55	14	0	1.0853	1.3112	1.51189	1.52856	1.66256	1.4804	1.77192	1.88162	1.89656
P35998	PSMC2	0.930792	0.399364	0.39869	0.630848	-0.103469			-0.943847		MSS1	26S proteasome regulatory subunit 7 OS=Homo sapiens OX=9606 GN=PSMC2 PE=1 SV=3	0	67.901	37	16	227	16	433	48.6	5.95	95.11	16	0	2.3171	2.51145	2.53059	2.39885	2.45882	2.5343	2.65977	2.38613	2.62365
A0A2R8Y4L2	HNRNPA1L3	1.11873	0.40965	0.389359	0.620424	0.161863			0.964623		HNRNPA1P48	Heterogeneous nuclear ribonucleoprotein A1-like 3 OS=Homo sapiens OX=9606 GN=HNRNPA1L3 PE=4 SV=2	0	67.646	49	13	273	12	320	34.3	9	116.22	13	0	3.35795	3.50741	3.49432	2.65729	2.67036	2.54411	3.58034	3.02445	3.26931
P41091	EIF2S3	1.19885	0.57233	0.267714	0.48223	0.261654			1.28639		EIF2G	Eukaryotic translation initiation factor 2 subunit 3 OS=Homo sapiens OX=9606 GN=EIF2S3 PE=1 SV=3	0	67.516	34	14	320	14	472	51.1	8.4	155.22	14	0	4.23819	4.33363	4.45266	4.18406	3.88811	3.90465	4.39426	3.72661	4.11865
Q2VIR3	EIF2S3B	1.19885	0.57233	0.267714	0.48191	0.261654			1.28639			Eukaryotic translation initiation factor 2 subunit 3B OS=Homo sapiens OX=9606 GN=EIF2S3B PE=2 SV=2	0	67.516	34	14	320	14	472	51.2	8.4	155.22	14	0	4.23819	4.33363	4.45266	4.18406	3.88811	3.90465	4.39426	3.72661	4.11865
P15170	GSPT1	0.915487	0.663754	0.216893	0.416425	-0.127389			-1.46458		ERF3A	Eukaryotic peptide chain release factor GTP-binding subunit ERF3A OS=Homo sapiens OX=9606 GN=GSPT1 PE=1 SV=1	0	67.508	39	16	245	16	499	55.7	5.62	99.57	16	0	2.65753	2.76351	2.67351	2.56654	2.55401	2.59469	2.97434	2.69796	2.80441
P12956	XRCC6	1.02591	0.121917	0.755236	0.887398	0.0369013			0.333886		G22P1	X-ray repair cross-complementing protein 6 OS=Homo sapiens OX=9606 GN=XRCC6 PE=1 SV=2	0	67.499	31	17	313	17	609	69.8	6.64	118.84	17	0	2.88435	2.83688	2.97722	3.63621	3.46182	3.53264	3.01469	2.66738	2.90568
P05067	APP	0.864532	1.00245	0.0994382	0.234329	-0.210009			-2.13686		A4 AD1	Amyloid-beta precursor protein OS=Homo sapiens OX=9606 GN=APP PE=1 SV=3	0	67.486	19	13	419	13	770	86.9	4.82	174.88	13	0	3.87494	3.91149	3.6082	4.43747	4.34463	4.40051	4.05368	3.98926	3.98171
Q12873	CHD3	1.07325	0.125378	0.749242	0.885028	0.101992			0.342462			Chromodomain-helicase-DNA-binding protein 3 OS=Homo sapiens OX=9606 GN=CHD3 PE=1 SV=3	0	67.339	13	16	152	12	2000	226.5	7.3	42.84	16	2	0.612637	-0.130332	-0.146548	-0.646659	-0.380632	-1.07199	-0.249805	0.305298	-0.025713
Q15025	TNIP1	0.650833	2.40217	0.00396122	0.0884314	-0.61964			-5.96723	+	KIAA0113 NAF1	TNFAIP3-interacting protein 1 OS=Homo sapiens OX=9606 GN=TNIP1 PE=1 SV=2	0	67.337	30	15	264	15	636	71.8	6.62	108.55	15	0	2.29354	2.19681	2.37787	2.22181	2.31299	2.12881	2.97226	3.02285	2.73204
O00468	AGRN	1.14184	0.410507	0.388591	0.619281	0.191363			0.966351		AGRIN	Agrin OS=Homo sapiens OX=9606 GN=AGRN PE=1 SV=6	0	67.308	14	16	189	16	2068	217.2	6.39	60.33	16	0	0.73868	0.54537	0.464804	0.715751	0.851792	0.291999	0.732052	0.116975	0.325738
P06744	GPI	1.10409	0.283559	0.520525	0.73301	0.142863			0.703521			Glucose-6-phosphate isomerase OS=Homo sapiens OX=9606 GN=GPI PE=1 SV=4	0	67.197	31	12	239	12	558	63.1	8.32	90.9	12	0	4.1193	4.08996	3.94958	4.41076	4.3728	4.3259	4.19352	3.53336	4.00337
Q8IZH2	XRN1	1.33287	1.15434	0.0700909	0.188485	0.414541			2.45469		SEP1	5'-3' exoribonuclease 1 OS=Homo sapiens OX=9606 GN=XRN1 PE=1 SV=1	0	67.077	11	18	182	18	1706	194	7.21	69.56	18	0	1.09509	1.11133	1.25948	-0.0890806	-0.168297	-0.171803	0.490816	1.04037	0.691091
P47756	CAPZB	1.31005	1.16527	0.0683484	0.186749	0.389618			2.47812			F-actin-capping protein subunit beta OS=Homo sapiens OX=9606 GN=CAPZB PE=1 SV=5	0	66.998	51	13	300	13	272	30.6	6	117.03	13	0	3.46308	3.68451	3.43841	2.30952	2.72704	2.23581	3.05219	2.95858	3.40638
P28340	POLD1	0.524036	2.0334	0.00925975	0.0945106	-0.932261			-4.70707	+	POLD	DNA polymerase delta catalytic subunit OS=Homo sapiens OX=9606 GN=POLD1 PE=1 SV=2	0	66.945	19	16	200	16	1107	123.6	7.03	73.24	16	0	-0.0222664	0.119347	-0.285445	-0.20879	-0.38798	0.292385	1.14189	0.592464	0.874067
P43490	NAMPT	0.961028	0.203599	0.625751	0.818735	-0.0573491			-0.527499		PBEF PBEF1	Nicotinamide phosphoribosyltransferase OS=Homo sapiens OX=9606 GN=NAMPT PE=1 SV=1	0	66.896	41	16	323	16	491	55.5	7.15	154.26	16	0	4.0063	4.13317	4.01399	3.63713	3.7902	3.80074	4.23032	3.90878	4.1864
P60174	TPI1	1.0991	0.205974	0.622337	0.817647	0.136329			0.532894		TPI	Triosephosphate isomerase OS=Homo sapiens OX=9606 GN=TPI1 PE=1 SV=4	0	66.791	71	13	249	13	249	26.7	6.9	101.39	13	0	2.85673	3.34158	2.63361	3.23487	2.92986	3.2789	2.99444	2.51636	2.91214
Q9UP95	SLC12A4	0.873783	0.969098	0.107375	0.246785	-0.194653			-2.06881		KCC1	Solute carrier family 12 member 4 OS=Homo sapiens OX=9606 GN=SLC12A4 PE=1 SV=2	0	66.748	16	16	247	16	1085	120.6	6.44	97.18	16	0	1.53778	1.41151	1.32286	1.94859	2.12765	2.1762	1.75894	1.53659	1.56059
Q96J02	ITCH	1.24238	0.450078	0.35475	0.592236	0.313108			1.04564			E3 ubiquitin-protein ligase Itchy homolog OS=Homo sapiens OX=9606 GN=ITCH PE=1 SV=2	0	66.587	23	15	320	12	903	102.7	6.3	151.06	15	0	2.54922	2.40854	2.22326	2.31604	2.29941	2.53687	2.47552	1.52915	2.23703
O43175	PHGDH	1.00184	0.0063656	0.98545	0.992599	0.00265471			0.0194021		PGDH3	D-3-phosphoglycerate dehydrogenase OS=Homo sapiens OX=9606 GN=PHGDH PE=1 SV=4	0	66.416	29	12	418	12	533	56.6	6.71	195.91	12	0	4.4969	4.62049	4.27268	4.82801	4.67478	4.93129	4.59034	4.2842	4.50756
Q6P2E9	EDC4	0.990025	0.009292	0.978832	0.989884	-0.0144639			-0.0282291		HEDLS	Enhancer of mRNA-decapping protein 4 OS=Homo sapiens OX=9606 GN=EDC4 PE=1 SV=1	0	66.223	16	15	207	15	1401	151.6	5.86	82.06	15	0	0.705637	0.208246	1.50022	2.81141	2.63157	2.75314	0.131722	1.07076	1.25501
P53396	ACLY	1.04303	0.134922	0.732956	0.877857	0.0607869			0.36592			ATP-citrate synthase OS=Homo sapiens OX=9606 GN=ACLY PE=1 SV=3	0	66.128	20	18	169	18	1101	120.8	7.33	73.8	18	0	1.09638	1.61486	1.23627	1.56278	1.65569	1.70769	1.33675	1.13785	1.29055
P30622	CLIP1	0.712778	1.08502	0.0822212	0.205852	-0.488475			-2.30791		CYLN1 RSN	CAP-Gly domain-containing linker protein 1 OS=Homo sapiens OX=9606 GN=CLIP1 PE=1 SV=2	0	66.031	13	17	150	17	1438	162.1	5.36	67.88	17	0	1.4111	1.11024	1.03916	1.93675	1.49154	1.51658	1.48866	2.03184	1.50542
P17987	TCP1	1.12759	0.552343	0.280322	0.501968	0.173249			1.24732		CCT1 CCTA	T-complex protein 1 subunit alpha OS=Homo sapiens OX=9606 GN=TCP1 PE=1 SV=1	0	65.987	39	15	268	15	556	60.3	6.11	119.83	15	0	3.3525	3.29908	3.27261	3.32137	3.14854	3.22229	3.31312	2.86573	3.2256
P55060	CSE1L	0.90843	0.337537	0.459688	0.682954	-0.138553			-0.817207		CAS XPO2	Exportin-2 OS=Homo sapiens OX=9606 GN=CSE1L PE=1 SV=3	0	65.881	23	18	209	18	971	110.3	5.77	99.63	18	0	1.40977	1.85141	1.90965	1.77063	2.12266	2.00617	1.80983	1.79106	1.98561
Q14974	KPNB1	1.17632	0.755768	0.175482	0.356413	0.234275			1.64419		NTF97	Importin subunit beta-1 OS=Homo sapiens OX=9606 GN=KPNB1 PE=1 SV=2	0	65.863	18	14	311	14	876	97.1	4.78	143.12	14	0	2.91276	2.97352	2.84479	2.88659	3.173	3.14325	2.78445	2.40292	2.84088
O95163	ELP1	1.21624	0.5859	0.259478	0.469178	0.28243			1.31288		IKAP IKBKAP	Elongator complex protein 1 OS=Homo sapiens OX=9606 GN=ELP1 PE=1 SV=3	0	65.787	14	17	343	17	1332	150.2	5.94	143.08	17	0	1.77144	2.20691	2.20176	1.48489	1.57788	1.94626	1.86461	1.46825	1.99997
Q96EV2	RBM33	0.714687	1.53124	0.0294282	0.117964	-0.484616			-3.31819		PRR8	RNA-binding protein 33 OS=Homo sapiens OX=9606 GN=RBM33 PE=1 SV=3	0	65.473	16	13	220	13	1170	129.9	6.93	96.61	13	0	1.99654	2.09168	2.36538	0.55006	0.417058	0.702743	2.6145	2.81074	2.4822
Q99650	OSMR	1.23537	0.515046	0.30546	0.536398	0.304941			1.17417		OSMRB	Oncostatin-M-specific receptor subunit beta OS=Homo sapiens OX=9606 GN=OSMR PE=1 SV=1	0	65.326	21	13	188	13	979	110.4	5.82	83.85	13	0	2.39861	2.24574	2.03344	2.57925	2.64223	2.49812	2.24749	1.45981	2.05568
P35221	CTNNA1	0.812201	1.89672	0.0126847	0.102661	-0.300092			-4.2961			Catenin alpha-1 OS=Homo sapiens OX=9606 GN=CTNNA1 PE=1 SV=1	0	65.298	22	14	187	12	906	100	6.29	70.85	14	1	1.42189	1.64256	1.53367	1.41243	1.6942	1.42668	1.82268	1.88671	1.78901
Q96EY1	DNAJA3	1.10367	0.631187	0.233783	0.434164	0.142307			1.40115		HCA57 TID1	DnaJ homolog subfamily A member 3, mitochondrial OS=Homo sapiens OX=9606 GN=DNAJA3 PE=1 SV=2	0	65.281	25	12	236	12	480	52.5	9.26	94.6	12	0	2.33221	2.56415	2.56347	1.84679	2.2417	2.00013	2.35629	2.22447	2.45214
O75976	CPD	1.14501	0.478522	0.33226	0.567326	0.195359			1.10213			Carboxypeptidase D OS=Homo sapiens OX=9606 GN=CPD PE=1 SV=2	0	65.238	14	16	319	16	1380	152.8	6.05	133.51	16	0	2.58211	2.44596	2.32088	2.71326	2.71182	2.96559	2.52806	1.97257	2.26223
Q8N4C8	MINK1	1.05126	0.324111	0.474121	0.696591	0.0721262			0.78924		B55 MAP4K6 MINK YSK2 ZC3	Misshapen-like kinase 1 OS=Homo sapiens OX=9606 GN=MINK1 PE=1 SV=2	0	65.157	14	17	201	10	1332	149.7	7.85	80.64	17	5	1.4304	1.26966	1.48773	1.19535	0.699995	0.90988	1.26346	1.25628	1.45167
Q9H3U1	UNC45A	1.13255	0.584388	0.260382	0.470184	0.179579			1.30993		SMAP1	Protein unc-45 homolog A OS=Homo sapiens OX=9606 GN=UNC45A PE=1 SV=1	0	65.125	21	16	321	16	944	103	6.07	146.27	16	0	2.60127	2.35549	2.29925	2.67285	2.80518	2.59929	2.41716	2.06758	2.23254
O60231	DHX16	0.853523	0.93168	0.117036	0.265008	-0.228498			-1.99309		DBP2 DDX16 KIAA0577 PRP2	Pre-mRNA-splicing factor ATP-dependent RNA helicase DHX16 OS=Homo sapiens OX=9606 GN=DHX16 PE=1 SV=2	0	65.095	20	16	201	16	1041	119.2	6.8	71.7	16	0	0.988899	1.33492	1.26971	0.351674	0.274604	0.0636844	1.43066	1.49908	1.34928
O94986	CEP152	0.372934	1.53784	0.0289842	0.116018	-1.42301			-3.33449		KIAA0912	Centrosomal protein of 152 kDa OS=Homo sapiens OX=9606 GN=CEP152 PE=1 SV=4	0	64.948	13	18	89	18	1710	195.5	5.6	24.58	18	0	-1.13226	-0.599316	-0.36978	-2.04592	-1.89712	-1.72504	0.62392	1.3932	0.150549
P20042	EIF2S2	1.12365	0.374336	0.422342	0.655974	0.168188			0.892969		EIF2B	Eukaryotic translation initiation factor 2 subunit 2 OS=Homo sapiens OX=9606 GN=EIF2S2 PE=1 SV=2	0	64.94	45	14	274	14	333	38.4	5.8	131.12	14	0	4.04921	4.077	4.18495	3.96364	4.06177	3.84384	4.24707	3.61097	3.94856
Q8IWZ3	ANKHD1	1.48984	0.893354	0.127834	0.28078	0.575159			1.91617		KIAA1085 MASK VBARP	Ankyrin repeat and KH domain-containing protein 1 OS=Homo sapiens OX=9606 GN=ANKHD1 PE=1 SV=1	0	64.934	9	17	295	9	2542	269.3	5.73	118.15	17	4	2.30796	2.10327	1.79883	2.29648	1.77491	2.05104	1.93855	1.03425	1.51179
Q96QK1	VPS35	1.20274	1.10713	0.078139	0.201549	0.266327			2.3544		MEM3	Vacuolar protein sorting-associated protein 35 OS=Homo sapiens OX=9606 GN=VPS35 PE=1 SV=2	0	64.91	24	16	200	16	796	91.6	5.49	94.37	16	0	1.14252	1.08253	1.2732	0.635473	1.22401	1.36378	0.835028	0.77168	1.09256
P38646	HSPA9	1.84139	3.34928	0.000447424	0.11075	0.880797			10.6055	+	GRP75 HSPA9B mt-HSP70	Stress-70 protein, mitochondrial OS=Homo sapiens OX=9606 GN=HSPA9 PE=1 SV=2	0	64.871	25	16	310	16	679	73.6	6.16	162.65	16	0	4.04329	3.98381	4.25636	3.63501	3.58117	3.83049	3.22749	3.21044	3.20314
P05141	SLC25A5	1.05973	0.28206	0.522324	0.734561	0.0837029			0.700314		AAC2 ANT2	ADP/ATP translocase 2 OS=Homo sapiens OX=9606 GN=SLC25A5 PE=1 SV=7	0	64.865	47	15	651	6	298	32.8	9.69	348.24	15	7	7.17448	7.12908	7.13688	6.65697	6.78211	6.76839	7.27638	6.86618	7.04678
Q14145	KEAP1	1.10408	0.241156	0.573911	0.781809	0.142846			0.611508		INRF2 KIAA0132 KLHL19	Kelch-like ECH-associated protein 1 OS=Homo sapiens OX=9606 GN=KEAP1 PE=1 SV=2	0	64.713	29	15	248	15	624	69.6	6.44	125.85	15	0	2.61217	2.52752	2.3755	2.90552	2.74811	2.81895	2.66072	1.92575	2.50018
Q9UJS0	SLC25A13	0.96121	0.462877	0.344447	0.58135	-0.057076			-1.07111			Electrogenic aspartate/glutamate antiporter SLC25A13, mitochondrial OS=Homo sapiens OX=9606 GN=SLC25A13 PE=1 SV=2	0	64.679	28	16	237	11	675	74.1	8.62	117.99	16	5	2.33413	2.38982	2.36577	1.51644	1.88197	1.667	2.5063	2.33049	2.42415
Q8NC51	SERBP1	1.32725	1.77409	0.0168234	0.102962	0.408437			3.94962		PAIRBP1	SERPINE1 mRNA-binding protein 1 OS=Homo sapiens OX=9606 GN=SERBP1 PE=1 SV=2	0	64.647	35	15	325	15	408	44.9	8.65	144.1	15	0	3.46553	3.37941	3.37155	2.99457	2.47555	2.62112	3.17601	2.83446	2.98071
P04899	GNAI2	1.2691	0.702669	0.198304	0.390105	0.343807			1.54042		GNAI2B	Guanine nucleotide-binding protein G(i) subunit alpha-2 OS=Homo sapiens OX=9606 GN=GNAI2 PE=1 SV=3	0	64.494	41	12	272	10	355	40.4	5.54	114.64	12	2	3.37863	3.44951	3.16918	3.14359	3.38387	3.38323	3.29515	2.5951	3.07564
P48634	PRRC2A	1.48245	1.95852	0.0110022	0.10611	0.567987			4.47854		BAT2 G2	Protein PRRC2A OS=Homo sapiens OX=9606 GN=PRRC2A PE=1 SV=3	0	64.383	11	16	172	16	2157	228.7	9.45	53.31	16	0	1.62844	1.62705	1.98491	0.824769	0.843803	0.908894	1.11101	1.2605	1.16493
Q15233	NONO	1.34405	1.5007	0.0315718	0.121709	0.426589			3.24341		NRB54	Non-POU domain-containing octamer-binding protein OS=Homo sapiens OX=9606 GN=NONO PE=1 SV=4	0	64.254	26	12	290	11	471	54.2	8.95	135.11	12	0	3.83684	4.01224	3.76029	3.4053	3.22313	3.44884	3.64327	3.27113	3.4152
P21127	CDK11B	0.824347	2.63102	0.00233871	0.0821765	-0.278677			-6.88001		CDC2L1 CDK11 PITSLREA PK58	Cyclin-dependent kinase 11B OS=Homo sapiens OX=9606 GN=CDK11B PE=1 SV=4	0	64.158	19	17	384	2	795	92.6	5.54	165.1	17	11	2.68357	2.64936	2.69678	2.6822	2.76202	2.5937	3.01979	2.9576	2.88835
Q86VP6	CAND1	0.886385	0.261427	0.547738	0.755384	-0.173995			-0.655834		KIAA0829 TIP120 TIP120A	Cullin-associated NEDD8-dissociated protein 1 OS=Homo sapiens OX=9606 GN=CAND1 PE=1 SV=2	0	64.112	17	16	252	16	1230	136.3	5.78	90.28	16	0	1.21998	0.918954	0.664112	1.44324	1.5569	1.58614	1.45263	1.14795	0.724456
Q9BUQ8	DDX23	0.840655	0.418062	0.381889	0.61183	-0.250415			-0.981564			Probable ATP-dependent RNA helicase DDX23 OS=Homo sapiens OX=9606 GN=DDX23 PE=1 SV=3	0	64.107	21	15	320	15	820	95.5	9.55	127.39	15	0	5.06417	4.64757	5.33419	4.99936	5.30335	5.46781	5.3969	4.94974	5.45053
Q8NDV7	TNRC6A	0.455556	1.90783	0.0123643	0.104498	-1.1343			-4.3285	+	CAGH26 KIAA1460 TNRC6	Trinucleotide repeat-containing gene 6A protein OS=Homo sapiens OX=9606 GN=TNRC6A PE=1 SV=2	0	64.084	12	15	140	14	1962	210.2	7.01	55.98	15	1	0.51149	0.455243	0.88838	-0.911397	-0.652596	-0.385331	1.69999	2.16432	1.3937
P62136	PPP1CA	0.87149	0.981988	0.104235	0.242516	-0.198444			-2.09505		PPP1A	Serine/threonine-protein phosphatase PP1-alpha catalytic subunit OS=Homo sapiens OX=9606 GN=PPP1CA PE=1 SV=1	0	64.061	50	12	307	3	330	37.5	6.33	117.81	12	8	2.79894	2.52478	2.7636	2.48596	2.72151	3.06067	2.94103	2.92586	2.81575
Q6ZW31	SYDE1	0.923401	0.42698	0.374128	0.605663	-0.11497			-0.999472			Rho GTPase-activating protein SYDE1 OS=Homo sapiens OX=9606 GN=SYDE1 PE=1 SV=1	0	63.741	29	16	205	16	735	79.7	8.43	66.69	16	0	1.23809	0.961997	1.23445	1.34507	1.19224	1.5171	1.26469	1.37821	1.13655
Q8IY17	PNPLA6	1.15686	1.11266	0.0771516	0.201211	0.210212			2.36606		NTE	Patatin-like phospholipase domain-containing protein 6 OS=Homo sapiens OX=9606 GN=PNPLA6 PE=1 SV=3	0	63.733	18	19	274	19	1375	150.9	7.74	114.4	19	0	2.45636	2.40565	2.36912	2.45864	2.50446	2.50134	2.03471	2.31795	2.24784
Q14137	BOP1	1.40158	1.52467	0.0298763	0.118265	0.487056			3.30204		KIAA0124	Ribosome biogenesis protein BOP1 OS=Homo sapiens OX=9606 GN=BOP1 PE=1 SV=2	0	63.589	27	13	243	13	746	83.6	6.19	97.51	13	0	2.68826	2.50883	2.37835	1.98716	2.45274	2.04568	2.26572	1.87739	1.97116
Q9UG63	ABCF2	1.11463	0.308938	0.490978	0.710037	0.156559			0.757399			ATP-binding cassette sub-family F member 2 OS=Homo sapiens OX=9606 GN=ABCF2 PE=1 SV=2	0	63.582	28	16	317	16	623	71.2	7.37	153.58	16	0	3.19583	3.0843	3.09272	2.60406	2.01182	2.64062	3.22306	2.56541	3.1147
Q9NW13	RBM28	1.02478	0.0756686	0.840101	0.92534	0.0353166			0.215252			RNA-binding protein 28 OS=Homo sapiens OX=9606 GN=RBM28 PE=1 SV=3	0	63.556	23	16	258	16	759	85.7	9.22	99.12	16	0	1.69065	1.5326	1.82346	1.68767	1.49473	1.63341	1.65885	1.39714	1.88478
Q13637	RAB32	0.965731	0.565152	0.272175	0.489924	-0.0503074			-1.27237			Ras-related protein Rab-32 OS=Homo sapiens OX=9606 GN=RAB32 PE=1 SV=3	0	63.493	73	14	438	12	225	25	6.54	219.18	14	1	3.47248	3.46583	3.51521	3.39243	3.51486	3.72911	3.46216	3.56757	3.57471
Q96PU5	NEDD4L	0.971926	0.0512276	0.888735	0.948401	-0.0410812			-0.149039		KIAA0439 NEDL3	E3 ubiquitin-protein ligase NEDD4-like OS=Homo sapiens OX=9606 GN=NEDD4L PE=1 SV=2	0	63.287	20	17	312	13	975	111.9	5.82	144.93	17	3	2.14235	1.95855	1.89251	1.7943	1.82462	2.07505	2.36394	1.51314	2.23958
P55795	HNRNPH2	0.658569	0.763802	0.172265	0.351203	-0.602593			-1.65993		FTP3 HNRPH2	Heterogeneous nuclear ribonucleoprotein H2 OS=Homo sapiens OX=9606 GN=HNRNPH2 PE=1 SV=1	0	63.224	32	11	744	5	449	49.2	6.3	389.4	11	0	0.0472946	-0.0304334	0.617225	-1.83864	-0.493632	-1.28941	0.463991	1.41137	0.566509
P05388	RPLP0	1.13424	0.388469	0.408819	0.638603	0.181729			0.921758			Large ribosomal subunit protein uL10 OS=Homo sapiens OX=9606 GN=RPLP0 PE=1 SV=1	0	63.207	45	11	673	11	317	34.3	5.97	295.29	11	0	6.42484	6.19475	6.21015	5.96658	5.79828	6.03235	6.33329	5.736	6.21527
P14649	MYL6B	1.36929	0.554217	0.279115	0.5013	0.453423			1.25099		MLC1SA	Myosin light chain 6B OS=Homo sapiens OX=9606 GN=MYL6B PE=1 SV=1	0	63.152	63	10	820	7	208	22.8	5.73	443.48	10	0	1.81855	1.38147	1.18366	1.948	1.97404	2.05033	1.41895	0.399999	1.20445
Q9Y3I0	RTCB	0.733773	2.5491	0.00282424	0.08465	-0.446594			-6.54043		C22orf28	RNA-splicing ligase RtcB homolog OS=Homo sapiens OX=9606 GN=RTCB PE=1 SV=1	0	63.125	36	15	304	15	505	55.2	7.23	130.03	15	0	3.04612	3.04661	3.23401	3.675	3.79509	3.69024	3.60286	3.55567	3.508
Q86UE4	MTDH	1.11989	0.805475	0.156504	0.327576	0.163351			1.74182		AEG1 LYRIC	Protein LYRIC OS=Homo sapiens OX=9606 GN=MTDH PE=1 SV=2	0	63.078	38	15	179	15	582	63.8	9.32	68.4	15	0	1.95357	2.00396	2.16035	0.79195	0.702959	0.647453	1.9192	1.73875	1.96988
P62753	RPS6	1.07097	0.176456	0.666108	0.845097	0.0989119			0.465014			Small ribosomal subunit protein eS6 OS=Homo sapiens OX=9606 GN=RPS6 PE=1 SV=1	0	63.029	42	13	656	13	249	28.7	10.84	359.04	13	0	6.35799	6.15167	6.30367	6.01195	5.77754	5.89529	6.48884	5.7923	6.23546
Q13823	GNL2	1.21111	0.742853	0.180779	0.366056	0.276333			1.61891		NGP1	Nucleolar GTP-binding protein 2 OS=Homo sapiens OX=9606 GN=GNL2 PE=1 SV=1	0	62.193	19	14	208	14	731	83.6	9.25	79.22	14	0	2.71809	2.56129	2.65408	2.33334	2.21687	2.37774	2.5294	2.03915	2.53591
O75420	GIGYF1	0.199549	1.67988	0.0208988	0.107658	-2.32519			-3.69653	+	CDS2 PERQ1	GRB10-interacting GYF protein 1 OS=Homo sapiens OX=9606 GN=GIGYF1 PE=1 SV=2	0	61.946	17	13	248	13	1035	114.5	5.39	110.19	13	0	1.14668	1.01359	1.78677	0.462693	0.485157	0.548443	2.52303	4.48077	3.9188
Q9P265	DIP2B	1.0094	0.0349526	0.922672	0.962903	0.0134967			0.103333		KIAA1463	Disco-interacting protein 2 homolog B OS=Homo sapiens OX=9606 GN=DIP2B PE=1 SV=3	0	61.919	14	17	232	15	1576	171.4	8.09	84.69	17	2	1.09393	1.28234	1.10697	1.59097	1.66309	1.92053	1.24929	0.916864	1.27659
P38935	IGHMBP2	1.79655	0.545554	0.284738	0.5075	0.845231			1.23403		SMBP2 SMUBP2	DNA-binding protein SMUBP-2 OS=Homo sapiens OX=9606 GN=IGHMBP2 PE=1 SV=3	0	61.904	23	15	186	15	993	109.1	8.97	58.48	15	0	0.666223	0.892787	0.853417	0.448184	0.389338	0.871404	0.802979	-1.38963	0.463384
Q86TB9	PATL1	0.533279	1.89465	0.0127453	0.101869	-0.907037			-4.29009	+		Protein PAT1 homolog 1 OS=Homo sapiens OX=9606 GN=PATL1 PE=1 SV=2	0	61.837	19	13	266	13	770	86.8	6.67	123.62	13	0	2.57838	2.54263	2.91416	2.25497	2.08148	2.24482	3.4539	3.93247	3.36991
Q9UJM3	ERRFI1	0.487089	1.43161	0.0370163	0.133602	-1.03774			-3.07765		MIG6	ERBB receptor feedback inhibitor 1 OS=Homo sapiens OX=9606 GN=ERRFI1 PE=1 SV=1	0	61.821	32	12	179	12	462	50.5	8.1	42.88	12	0	1.67926	1.47313	1.16211	-2.95563	-4.13368	-5.07087	2.58931	2.93269	1.90573
P55072	VCP	0.930729	0.122287	0.754594	0.887343	-0.103566			-0.334804		HEL-220 HEL-S-70	Transitional endoplasmic reticulum ATPase OS=Homo sapiens OX=9606 GN=VCP PE=1 SV=4	0	61.433	29	16	189	16	806	89.3	5.26	68.24	16	0	1.3806	2.05203	2.06765	2.07738	2.04447	1.89558	1.75623	2.35709	1.69767
P08195	SLC3A2	1.32829	1.19995	0.0631034	0.176946	0.409569			2.55301		MDU1	Amino acid transporter heavy chain SLC3A2 OS=Homo sapiens OX=9606 GN=SLC3A2 PE=1 SV=3	0	61.252	24	14	328	14	630	68	5.01	154.17	14	0	4.21028	3.88047	3.75838	4.38009	4.16187	4.34667	3.68396	3.38427	3.55219
P30050	RPL12	1.19224	0.371613	0.424998	0.659297	0.253675			0.887405			Large ribosomal subunit protein uL11 OS=Homo sapiens OX=9606 GN=RPL12 PE=1 SV=1	0	60.971	70	9	717	9	165	17.8	9.42	341.37	9	0	7.4701	7.2276	7.23693	7.0293	6.7877	6.98683	7.45292	6.52985	7.19082
Q9Y450	HBS1L	0.674322	1.31503	0.0484144	0.15899	-0.568489			-2.80802		HBS1 KIAA1038	HBS1-like protein OS=Homo sapiens OX=9606 GN=HBS1L PE=1 SV=1	0	60.964	29	14	307	14	684	75.4	6.61	135.21	14	0	2.43725	2.59155	2.90544	2.08385	2.30054	2.076	2.98903	3.49368	3.157
Q6P996	PDXDC1	1.14887	0.527794	0.296624	0.52295	0.200213			1.19922		KIAA0251	Pyridoxal-dependent decarboxylase domain-containing protein 1 OS=Homo sapiens OX=9606 GN=PDXDC1 PE=1 SV=2	0	60.806	22	15	172	15	788	86.7	5.38	59.24	15	0	1.2278	1.30047	1.15241	1.59505	1.68627	1.28231	1.1219	0.711975	1.24617
Q27J81	INF2	1.27872	0.668058	0.214754	0.411646	0.354704			1.47296		C14orf151 C14orf173	Inverted formin-2 OS=Homo sapiens OX=9606 GN=INF2 PE=1 SV=2	0	60.8	17	14	126	14	1249	135.5	5.38	54.8	14	0	-0.822018	-0.828224	-1.52344	-0.191965	-0.363449	-1.41502	-1.5291	-1.3894	-1.3193
P46060	RANGAP1	0.705412	2.70445	0.00197494	0.0772881	-0.503461			-7.19728	+	KIAA1835 SD	Ran GTPase-activating protein 1 OS=Homo sapiens OX=9606 GN=RANGAP1 PE=1 SV=1	0	60.795	29	14	208	14	587	63.5	4.68	77.04	14	0	1.62299	1.82152	1.79542	1.65095	1.78077	1.17816	2.25572	2.30222	2.19236
O94973	AP2A2	2.76181	2.23153	0.00586768	0.0898705	1.46562			5.35456	+	ADTAB CLAPA2 HIP9 HYPJ KIAA0899	AP-2 complex subunit alpha-2 OS=Homo sapiens OX=9606 GN=AP2A2 PE=1 SV=2	0	60.629	21	12	322	6	939	103.9	6.96	170.9	12	0	1.03199	0.903253	0.817511	0.534493	1.07096	0.632793	-0.112572	-1.032	-0.499521
P38919	EIF4A3	1.31668	2.22977	0.00589162	0.0892286	0.3969			5.34849		DDX48 KIAA0111	Eukaryotic initiation factor 4A-III OS=Homo sapiens OX=9606 GN=EIF4A3 PE=1 SV=4	0	60.51	29	13	271	12	411	46.8	6.73	136.36	13	1	2.10264	2.20887	2.32356	2.13111	1.94859	2.08516	1.88703	1.7587	1.79864
P26639	TARS1	1.20902	0.673053	0.212298	0.407107	0.273832			1.48269		TARS	Threonine--tRNA ligase 1, cytoplasmic OS=Homo sapiens OX=9606 GN=TARS1 PE=1 SV=3	0	60.321	27	15	268	15	723	83.4	6.67	121.38	15	0	2.49677	2.93352	2.71595	2.69229	2.50243	2.6142	2.51542	2.17983	2.62949
Q53EZ4	CEP55	1.24337	0.605791	0.247861	0.454235	0.314261			1.35167		C10orf3 URCC6	Centrosomal protein of 55 kDa OS=Homo sapiens OX=9606 GN=CEP55 PE=1 SV=3	0	60.268	32	13	151	13	464	54.1	7.01	61.12	13	0	1.58312	1.12915	1.34801	-0.677524	-0.635249	-0.126841	1.23811	0.655194	1.22419
Q9Y4P3	TBL2	1.08291	0.233863	0.583629	0.791595	0.114911			0.595396		WBSCR13	Transducin beta-like protein 2 OS=Homo sapiens OX=9606 GN=TBL2 PE=1 SV=1	0	60.052	31	15	247	15	447	49.8	9.44	104.59	15	0	2.03	2.18034	2.17002	0.808667	0.833801	0.635158	2.31506	1.6712	2.04938
Q8TDM6	DLG5	1.02793	0.130668	0.740171	0.881706	0.0397386			0.355498		KIAA0583 PDLG	Disks large homolog 5 OS=Homo sapiens OX=9606 GN=DLG5 PE=1 SV=4	0	59.969	12	19	98	19	1919	213.7	7.42	31.88	19	0	0.216742	0.257023	0.264492	-0.206952	-0.563469	-0.332622	0.295587	-0.013925	0.337379
Q9Y4X5	ARIH1	0.465342	2.15265	0.00703635	0.0878049	-1.10364			-5.089	+	ARI MOP6 UBCH7BP	E3 ubiquitin-protein ligase ARIH1 OS=Homo sapiens OX=9606 GN=ARIH1 PE=1 SV=2	0	59.772	23	13	252	13	557	64.1	5.08	127.22	13	0	2.76935	3.11325	3.31656	3.03027	3.16749	3.30046	3.92886	4.43541	4.1458
P08243	ASNS	0.983624	0.0792197	0.83326	0.92379	-0.0238211			-0.224652		TS11	Asparagine synthetase [glutamine-hydrolyzing] OS=Homo sapiens OX=9606 GN=ASNS PE=1 SV=4	0	59.728	30	15	238	15	561	64.3	6.86	106.85	15	0	2.3147	2.55305	2.40004	1.91461	1.95431	2.24233	2.52352	2.28667	2.52907
Q92945	KHSRP	0.591945	1.53752	0.0290053	0.115757	-0.756464			-3.3337		FUBP2	Far upstream element-binding protein 2 OS=Homo sapiens OX=9606 GN=KHSRP PE=1 SV=4	0	59.698	28	14	193	14	711	73.1	7.3	74.19	14	0	1.43834	1.32442	1.70928	1.49131	1.66426	1.82556	2.09457	2.63636	2.0105
Q9Y224	RTRAF	1.0313	0.12037	0.757932	0.888293	0.0444579			0.330039		C14orf166	RNA transcription, translation and transport factor protein OS=Homo sapiens OX=9606 GN=RTRAF PE=1 SV=1	0	59.666	51	14	229	14	244	28.1	6.65	112.68	14	0	2.77364	2.47168	2.89235	3.01998	3.42892	3.14146	2.69337	2.73864	2.57228
O95905	ECD	1.65562	1.58752	0.0258512	0.114064	0.727374			3.45858			Protein ecdysoneless homolog OS=Homo sapiens OX=9606 GN=ECD PE=1 SV=1	0	59.635	25	13	187	13	644	72.7	4.87	67.97	13	0	1.8273	1.99399	1.61283	1.33637	1.66343	1.80714	1.35218	0.744384	1.15544
Q6DD88	ATL3	1.35883	1.18759	0.0649242	0.180011	0.442369			2.52624			Atlastin-3 OS=Homo sapiens OX=9606 GN=ATL3 PE=1 SV=1	0	59.593	31	13	117	13	541	60.5	5.66	45.17	13	0	1.60853	1.35649	1.34075	1.00056	1.81411	1.47832	0.718708	1.01582	1.24413
P62913	RPL11	1.2107	0.469687	0.339089	0.5754	0.275836			1.08462			Large ribosomal subunit protein uL5 OS=Homo sapiens OX=9606 GN=RPL11 PE=1 SV=2	0	59.527	57	11	380	11	178	20.2	9.6	174.2	11	0	5.92296	5.59631	5.55591	5.50573	5.2449	5.40807	5.72643	4.97568	5.54558
P08237	PFKM	0.885297	0.761683	0.173108	0.352111	-0.175766			-1.65578		PFKX	ATP-dependent 6-phosphofructokinase, muscle type OS=Homo sapiens OX=9606 GN=PFKM PE=1 SV=2	0	59.519	18	14	294	12	780	85.1	7.99	134.22	14	0	1.13567	1.31053	1.40961	1.67437	1.74204	1.71704	1.58547	1.34447	1.45318
P27824	CANX	1.05945	0.266436	0.541457	0.750188	0.0833218			0.666689			Calnexin OS=Homo sapiens OX=9606 GN=CANX PE=1 SV=2	0	59.506	25	14	248	14	592	67.5	4.6	118.87	14	0	3.23844	3.40845	3.04683	4.02114	3.94205	3.8832	3.24201	3.01434	3.1874
Q99715	COL12A1	0.453043	1.66859	0.021449	0.110667	-1.14228			-3.66693	+	COL12A1L	Collagen alpha-1(XII) chain OS=Homo sapiens OX=9606 GN=COL12A1 PE=1 SV=2	0	59.46	6	16	137	16	3063	332.9	5.53	53.46	16	0	3.79148	3.49469	4.21868	3.53171	4.20496	4.00985	4.6228	5.4083	4.90059
Q9NTJ5	SACM1L	0.944862	0.50162	0.31505	0.548469	-0.0818245			-1.14775		KIAA0851 SAC1	Phosphatidylinositol-3-phosphatase SAC1 OS=Homo sapiens OX=9606 GN=SACM1L PE=1 SV=2	0	59.441	28	15	233	15	587	66.9	7.12	98.8	15	0	2.02091	2.00547	2.18284	2.44505	2.58852	2.59533	2.13188	2.08858	2.23423
Q13428	TCOF1	1.35327	1.73042	0.0186029	0.105814	0.436445			3.83095			Treacle protein OS=Homo sapiens OX=9606 GN=TCOF1 PE=1 SV=3	0	59.336	14	15	137	15	1488	152	9.04	45.74	15	0	2.24929	2.17049	2.10681	2.22119	1.69957	1.94379	1.9507	1.64939	1.61717
Q9UPT8	ZC3H4	0.782578	0.799595	0.158637	0.330039	-0.353693			-1.73025		C19orf7 KIAA1064	Zinc finger CCCH domain-containing protein 4 OS=Homo sapiens OX=9606 GN=ZC3H4 PE=1 SV=3	0	59.292	16	12	198	12	1303	140.2	6.27	99.97	12	0	2.19734	1.92589	2.39202	1.79955	1.32324	1.41512	2.60038	2.74554	2.23041
Q9UHD2	TBK1	0.66553	1.58106	0.0262386	0.115101	-0.587425			-3.44229		NAK	Serine/threonine-protein kinase TBK1 OS=Homo sapiens OX=9606 GN=TBK1 PE=1 SV=1	0	59.265	26	14	270	14	729	83.6	6.79	123.7	14	0	2.24715	2.42973	2.38373	2.24817	2.58321	2.64581	3.07074	3.13243	2.61973
Q07020	RPL18	1.01934	0.0340421	0.924609	0.96366	0.0276345			0.100734			Large ribosomal subunit protein eL18 OS=Homo sapiens OX=9606 GN=RPL18 PE=1 SV=2	0	59.232	45	10	978	10	188	21.6	11.72	463.87	10	0	7.27967	7.0155	7.15988	6.81857	6.79394	7.13477	7.50001	6.61628	7.25586
Q04721	NOTCH2	0.889205	0.572609	0.267542	0.482085	-0.169412			-1.28694			Neurogenic locus notch homolog protein 2 OS=Homo sapiens OX=9606 GN=NOTCH2 PE=1 SV=3	0	59.145	10	15	166	13	2471	265.2	5.14	55.09	15	1	1.07114	1.00138	1.21415	1.19728	1.44327	1.36242	1.46483	1.06373	1.26634
Q9UDY2	TJP2	0.79301	0.939684	0.114899	0.262046	-0.334588			-2.00924		X104 ZO2	Tight junction protein ZO-2 OS=Homo sapiens OX=9606 GN=TJP2 PE=1 SV=2	0	58.992	17	16	150	16	1190	133.9	7.4	58.38	16	0	-0.209026	0.0238113	0.303753	-0.239466	-0.885479	-0.437917	0.419633	0.476701	0.22597
P04844	RPN2	1.10118	0.52377	0.299385	0.526314	0.139045			1.19132			Dolichyl-diphosphooligosaccharide--protein glycosyltransferase subunit 2 OS=Homo sapiens OX=9606 GN=RPN2 PE=1 SV=3	0	58.879	29	12	299	12	631	69.2	5.69	125.87	12	0	3.2798	3.31411	3.03241	3.53644	3.68808	3.83264	3.22135	2.9917	2.99614
P08708	RPS17	1.3229	1.39158	0.0405898	0.141842	0.403707			2.98371		RPS17L	Small ribosomal subunit protein eS17 OS=Homo sapiens OX=9606 GN=RPS17 PE=1 SV=2	0	58.762	59	11	319	11	135	15.5	9.85	151.69	11	0	2.68549	2.65508	2.6968	2.24293	1.75636	1.97435	2.00686	2.42876	2.39062
Q14257	RCN2	0.674803	1.56773	0.0270565	0.11677	-0.567462			-3.40883		ERC55	Reticulocalbin-2 OS=Homo sapiens OX=9606 GN=RCN2 PE=1 SV=1	0	58.71	43	10	263	10	317	36.9	4.4	109.42	10	0	4.46077	4.2982	4.47606	3.99871	4.08812	4.39159	4.94063	5.26729	4.7295
Q13425	SNTB2	1.51298	0.875557	0.133181	0.288795	0.597394			1.88065		D16S2531E SNT2B2 SNTL	Beta-2-syntrophin OS=Homo sapiens OX=9606 GN=SNTB2 PE=1 SV=1	0	58.683	33	13	170	13	540	57.9	8.82	53.75	13	0	0.944704	0.297183	-0.117053	1.0327	-0.0721128	0.26133	-0.0759651	-0.311502	-0.279882
Q2NL82	TSR1	1.10344	0.333173	0.46433	0.687583	0.142011			0.808138		KIAA1401	Pre-rRNA-processing protein TSR1 homolog OS=Homo sapiens OX=9606 GN=TSR1 PE=1 SV=1	0	58.632	21	14	269	14	804	91.8	7.42	126.56	14	0	3.03488	2.98394	2.82932	2.92953	2.83375	2.65946	2.78579	2.53385	3.10246
O76031	CLPX	1.27724	1.00917	0.0979112	0.23205	0.353028			2.15064			ATP-dependent Clp protease ATP-binding subunit clpX-like, mitochondrial OS=Homo sapiens OX=9606 GN=CLPX PE=1 SV=2	0	58.627	25	14	224	14	633	69.2	7.58	77.73	14	0	1.99167	2.12987	1.58909	1.69213	1.62561	2.10823	1.56437	1.50168	1.58549
Q9NUQ8	ABCF3	0.742933	2.16453	0.00684659	0.0887089	-0.428696			-5.1283			ATP-binding cassette sub-family F member 3 OS=Homo sapiens OX=9606 GN=ABCF3 PE=1 SV=2	0	58.602	24	13	206	13	709	79.7	6.34	79.98	13	0	1.20316	1.14855	1.3978	1.18732	0.538388	1.28852	1.7007	1.72603	1.60888
Q92888	ARHGEF1	1.17505	0.405674	0.39294	0.625955	0.232717			0.9566			Rho guanine nucleotide exchange factor 1 OS=Homo sapiens OX=9606 GN=ARHGEF1 PE=1 SV=2	0	58.502	17	15	170	15	912	102.4	5.66	62.06	15	0	0.233154	0.311249	0.203051	0.20073	-0.158019	-0.0580289	0.188523	0.320543	-0.459761
Q9ULH0	KIDINS220	1.30204	0.641315	0.228394	0.428506	0.380772			1.42087		ARMS KIAA1250	Kinase D-interacting substrate of 220 kDa OS=Homo sapiens OX=9606 GN=KIDINS220 PE=1 SV=3	0	58.498	11	16	144	16	1771	196.4	6.62	51.52	16	0	0.890688	0.60071	0.523063	1.61013	1.58619	1.73062	0.397805	-0.174291	0.648633
Q8TEX9	IPO4	1.20914	0.560948	0.274822	0.494689	0.273984			1.26415		IMP4B RANBP4	Importin-4 OS=Homo sapiens OX=9606 GN=IPO4 PE=1 SV=2	0	58.471	17	14	192	14	1081	118.6	4.96	79.98	14	0	2.92844	3.01852	2.99669	2.90502	2.9833	3.02246	2.96498	2.28022	2.8765
Q12774	ARHGEF5	0.775544	1.0151	0.0965827	0.230338	-0.366719			-2.16283		TIM	Rho guanine nucleotide exchange factor 5 OS=Homo sapiens OX=9606 GN=ARHGEF5 PE=1 SV=3	0	58.446	12	16	125	14	1597	176.7	5.53	36.73	16	1	0.562351	0.280535	0.78374	0.70837	0.557439	0.716811	1.07791	0.859415	0.789461
P27635	RPL10	1.12736	0.272775	0.533611	0.744138	0.172947			0.680373		DXS648E QM	Large ribosomal subunit protein uL16 OS=Homo sapiens OX=9606 GN=RPL10 PE=1 SV=5	0	58.428	44	13	571	8	214	24.6	10.08	334.85	13	4	5.97449	5.66639	5.59136	5.51924	5.19147	5.35112	5.93719	5.1598	5.61642
Q2TAY7	SMU1	0.919562	0.250835	0.561261	0.768401	-0.120982			-0.632755			WD40 repeat-containing protein SMU1 OS=Homo sapiens OX=9606 GN=SMU1 PE=1 SV=2	0	58.411	29	10	161	10	513	57.5	7.18	56.52	10	0	1.4457	1.84354	1.91202	1.35916	1.17155	1.0584	1.60692	1.99307	1.96422
P08758	ANXA5	0.992098	0.0226805	0.949116	0.975757	-0.0114454			-0.0679099		ANX5 ENX2 PP4	Annexin A5 OS=Homo sapiens OX=9606 GN=ANXA5 PE=1 SV=2	0	58.406	42	13	197	13	320	35.9	5.05	99.72	13	0	0.615305	0.889462	1.03896	1.56503	1.75886	1.66276	0.643893	0.902033	1.03214
Q12905	ILF2	0.866455	0.709108	0.195385	0.386063	-0.206803			-1.55298		NF45	Interleukin enhancer-binding factor 2 OS=Homo sapiens OX=9606 GN=ILF2 PE=1 SV=2	0	58.4	43	13	335	13	390	43	5.26	150.24	13	0	3.00061	3.15623	3.31162	2.99403	2.83083	2.8435	3.55693	3.23771	3.29423
P27348	YWHAQ	0.87175	1.25695	0.0553414	0.166706	-0.198014			-2.67804			14-3-3 protein theta OS=Homo sapiens OX=9606 GN=YWHAQ PE=1 SV=1	0	58.39	61	12	230	9	245	27.7	4.78	109.7	12	1	2.68915	2.87559	2.84626	2.89197	2.9915	3.06876	3.0691	2.91373	3.02221
P62249	RPS16	1.05372	0.205438	0.623105	0.818173	0.0754859			0.531678			Small ribosomal subunit protein uS9 OS=Homo sapiens OX=9606 GN=RPS16 PE=1 SV=2	0	58.341	54	11	607	11	146	16.4	10.21	349.69	11	0	6.11522	6.08891	6.07846	5.70946	5.49309	5.72689	6.26682	5.77657	6.01274
P14868	DARS1	0.734446	1.90999	0.012303	0.103887	-0.445273			-4.33481		DARS	Aspartate--tRNA ligase, cytoplasmic OS=Homo sapiens OX=9606 GN=DARS1 PE=1 SV=2	0	58.261	34	15	286	15	501	57.1	6.55	133.67	15	0	2.94463	2.63328	2.77484	2.7433	2.43774	2.44629	3.32811	3.18813	3.17232
P05387	RPLP2	1.12845	0.614292	0.243057	0.446558	0.174342			1.36824		D11S2243E RPP2	Large ribosomal subunit protein P2 OS=Homo sapiens OX=9606 GN=RPLP2 PE=1 SV=1	0	58.255	53	9	404	9	115	11.7	4.54	174.01	9	0	5.93475	5.69355	5.79321	5.4406	5.56658	5.76043	5.79945	5.43464	5.66439
Q8N684	CPSF7	1.13401	0.792695	0.161178	0.335204	0.181429			1.71667			Cleavage and polyadenylation specificity factor subunit 7 OS=Homo sapiens OX=9606 GN=CPSF7 PE=1 SV=1	0	58.163	33	12	300	12	471	52	8	138.98	12	0	3.13657	2.99839	3.32634	2.76033	2.77114	2.56842	3.02711	3.00938	2.88053
Q14008	CKAP5	1.10881	0.492414	0.3218	0.557143	0.149013			1.12959		KIAA0097	Cytoskeleton-associated protein 5 OS=Homo sapiens OX=9606 GN=CKAP5 PE=1 SV=3	0	58.093	9	16	142	16	2032	225.4	7.8	45.33	16	0	1.05098	1.44511	1.35974	-0.415414	-0.464114	0.0924958	1.07211	1.09006	1.24662
Q5SRE5	NUP188	0.86024	0.534229	0.292261	0.515703	-0.217189			-1.21184		KIAA0169	Nucleoporin NUP188 OS=Homo sapiens OX=9606 GN=NUP188 PE=1 SV=1	0	57.822	11	15	164	15	1749	195.9	6.73	60.21	15	0	-0.301031	0.196662	0.225268	-0.021972	-0.0509244	0.136402	0.365502	0.19827	0.208693
P53999	SUB1	1.1007	0.201861	0.628259	0.821326	0.138419			0.523547		PC4 RPO2TC1	Activated RNA polymerase II transcriptional coactivator p15 OS=Homo sapiens OX=9606 GN=SUB1 PE=1 SV=3	0	57.768	64	11	438	11	127	14.4	9.6	195.95	11	0	4.82306	4.48139	4.50867	4.87674	4.53926	4.69091	4.79539	3.99751	4.60496
P63244	RACK1	1.23262	0.919253	0.120433	0.268715	0.301727			1.96809		GNB2L1	Small ribosomal subunit protein RACK1 OS=Homo sapiens OX=9606 GN=RACK1 PE=1 SV=3	0	57.726	46	12	358	12	317	35.1	7.69	174.02	12	0	3.81095	4.20395	4.02048	3.14826	3.38327	3.7918	3.50403	3.81502	3.81115
Q6KC79	NIPBL	1.25306	0.905789	0.124225	0.273569	0.325457			1.94106		IDN3 SCC2	Nipped-B-like protein OS=Homo sapiens OX=9606 GN=NIPBL PE=1 SV=2	0	57.697	6	16	179	16	2804	315.9	7.91	61.95	16	0	1.11328	0.909758	1.12961	-0.507605	0.148373	0.148894	0.80146	0.432462	0.942361
O95819	MAP4K4	1.21727	0.540626	0.287988	0.510006	0.283647			1.22438		HGK KIAA0687 NIK	Mitogen-activated protein kinase kinase kinase kinase 4 OS=Homo sapiens OX=9606 GN=MAP4K4 PE=1 SV=2	0	57.655	15	16	153	9	1239	142	7.46	61.08	16	0	-5.05761	-5.36767	-5.8501	-5.60797	-5.47521	-5.17525	-5.68283	-5.75363	-5.68987
P15924	DSP	0.804376	0.610054	0.24544	0.450406	-0.314059			-1.35998			Desmoplakin OS=Homo sapiens OX=9606 GN=DSP PE=1 SV=3	0	57.553	7	17	80	17	2871	331.6	6.81	23.29	17	0	-0.134817	0.218661	0.527077	-0.270374	0.216675	-0.550499	0.423719	0.773652	0.355726
P53675	CLTCL1	1.4125	0.54945	0.282196	0.504039	0.498249			1.24166		CLH22 CLTCL CLTD	Clathrin heavy chain 2 OS=Homo sapiens OX=9606 GN=CLTCL1 PE=1 SV=2	0	57.551	8	13	192	13	1640	186.9	5.85	94.05	13	0	2.9142	2.78348	2.70955	2.73842	3.20714	3.20272	2.46552	1.55058	2.89639
A3KMH1	VWA8	1.33806	1.24698	0.0566264	0.168502	0.420147			2.65599		KIAA0564	von Willebrand factor A domain-containing protein 8 OS=Homo sapiens OX=9606 GN=VWA8 PE=1 SV=2	0	57.445	12	17	176	17	1905	214.7	7.4	54.63	17	0	0.91877	0.925038	0.667226	0.803617	0.922142	0.646135	0.356117	0.222133	0.672344
P62263	RPS14	0.995219	0.0115682	0.973715	0.986204	-0.00691398			-0.0350558			Small ribosomal subunit protein uS11 OS=Homo sapiens OX=9606 GN=RPS14 PE=1 SV=3	0	57.436	41	8	451	8	151	16.3	10.05	199.53	8	0	5.92292	5.83017	5.78406	5.53133	5.26826	5.43055	6.18296	5.51468	5.86025
P42224	STAT1	1.22526	1.2231	0.0598278	0.171201	0.293083			2.60349			Signal transducer and activator of transcription 1-alpha/beta OS=Homo sapiens OX=9606 GN=STAT1 PE=1 SV=2	0	57.323	23	14	280	14	750	87.3	6.05	146.44	14	0	2.05621	2.30141	2.17762	2.46536	2.70844	2.4811	1.76029	1.84174	2.05396
P62081	RPS7	1.36619	1.42828	0.0373007	0.134268	0.450161			3.06979			Small ribosomal subunit protein eS7 OS=Homo sapiens OX=9606 GN=RPS7 PE=1 SV=1	0	57.322	55	10	663	10	194	22.1	10.1	334.92	10	0	5.96539	5.84789	5.71885	5.0037	4.90913	4.91842	5.55431	5.14046	5.48689
P04792	HSPB1	1.0954	0.4586	0.347857	0.58434	0.131459			1.06261		HSP27 HSP28	Heat shock protein beta-1 OS=Homo sapiens OX=9606 GN=HSPB1 PE=1 SV=2	0	57.221	48	10	378	10	205	22.8	6.4	191.05	10	0	4.53062	4.47303	4.44222	4.61372	4.52648	4.49667	4.51876	4.11581	4.41693
Q8IWR0	ZC3H7A	1.26172	1.69197	0.020325	0.108748	0.335395			3.72841		ZC3H7 ZC3HDC7	Zinc finger CCCH domain-containing protein 7A OS=Homo sapiens OX=9606 GN=ZC3H7A PE=1 SV=1	0	57.206	21	16	143	15	971	110.5	7.3	54.54	16	0	0.649103	0.670403	0.759167	-1.77997	-0.380908	-0.606191	0.375967	0.204689	0.491833
P43246	MSH2	0.994838	0.0242188	0.94576	0.975195	-0.00746699			-0.0723983			DNA mismatch repair protein Msh2 OS=Homo sapiens OX=9606 GN=MSH2 PE=1 SV=1	0	57.019	17	14	201	14	934	104.7	5.77	94.42	14	0	1.94723	1.83092	1.92191	1.98226	1.81767	2.00747	2.08061	1.74548	1.89637
Q13616	CUL1	1.07454	0.250371	0.561861	0.768066	0.103715			0.63174			Cullin-1 OS=Homo sapiens OX=9606 GN=CUL1 PE=1 SV=2	0	57.004	23	15	143	15	776	89.6	8	54.72	15	0	1.69901	1.42966	1.61198	1.09644	1.34104	1.3276	1.66735	1.19494	1.56723
Q7Z417	NUFIP2	1.25111	1.18746	0.0649444	0.179753	0.323211			2.52594		KIAA1321	FMR1-interacting protein NUFIP2 OS=Homo sapiens OX=9606 GN=NUFIP2 PE=1 SV=1	0	56.991	23	11	196	11	695	76.1	8.7	88.09	11	0	2.35317	2.23848	2.37918	-0.32193	-0.164915	0.306053	2.16729	1.76654	2.06736
O43896	KIF1C	1.10962	0.355472	0.44109	0.668844	0.150061			0.854287		KIAA0706	Kinesin-like protein KIF1C OS=Homo sapiens OX=9606 GN=KIF1C PE=1 SV=3	0	56.982	17	16	220	12	1103	122.9	6.9	95.92	16	3	0.461212	0.777282	0.992851	0.972305	1.092	1.24026	0.74415	0.454533	0.582478
O95573	ACSL3	0.925487	1.72022	0.0190449	0.106555	-0.111716			-3.80358		ACS3 FACL3 LACS3	Fatty acid CoA ligase Acsl3 OS=Homo sapiens OX=9606 GN=ACSL3 PE=1 SV=3	0	56.815	19	13	265	12	720	80.4	8.38	123.49	13	1	1.74998	1.84096	1.79103	2.00059	2.12562	2.12344	1.92529	1.88093	1.91089
Q9Y287	ITM2B	1.43807	0.673101	0.212275	0.407414	0.524136			1.48278		BRI BRI2	Integral membrane protein 2B OS=Homo sapiens OX=9606 GN=ITM2B PE=1 SV=1	0	56.804	42	11	264	11	266	30.3	5.14	110.05	11	0	4.84121	4.31828	4.48329	5.08172	5.24742	5.0438	4.21528	3.40239	4.4527
Q14151	SAFB2	1.03615	0.0835035	0.825081	0.920392	0.051228			0.235922		KIAA0138	Scaffold attachment factor B2 OS=Homo sapiens OX=9606 GN=SAFB2 PE=1 SV=1	0	56.715	16	14	144	6	953	107.4	6.16	57.46	14	4	0.29896	-0.114717	0.460679	0.720384	0.584515	0.589584	0.0324434	0.43054	0.0282546
O95817	BAG3	0.408976	0.83009	0.14788	0.313892	-1.28991			-1.79041		BIS	BAG family molecular chaperone regulator 3 OS=Homo sapiens OX=9606 GN=BAG3 PE=1 SV=3	0	56.67	30	11	150	11	575	61.6	6.95	45.22	11	0	-2.2404	-0.281968	-0.091006	0.340529	0.454528	-0.397421	0.0136531	0.758361	0.48435
Q15645	TRIP13	0.858487	1.44809	0.0356378	0.128881	-0.220132			-3.11677		PCH2	Pachytene checkpoint protein 2 homolog OS=Homo sapiens OX=9606 GN=TRIP13 PE=1 SV=2	0	56.657	33	10	306	10	432	48.5	6.09	139	10	0	3.08567	3.0337	3.15783	2.95335	2.99392	3.17646	3.41713	3.20663	3.31384
P21980	TGM2	1.88127	3.54298	0.000286429	0.0673846	0.911704			11.8914	+		Protein-glutamine gamma-glutamyltransferase 2 OS=Homo sapiens OX=9606 GN=TGM2 PE=1 SV=2	0	56.533	29	13	235	13	687	77.3	5.22	74.36	13	0	1.72559	1.83995	1.97363	2.02974	2.19172	2.28354	0.8998	0.915924	0.988336
O60524	NEMF	1.098	0.519634	0.30225	0.53085	0.134883			1.18319		SDCCAG1	Ribosome quality control complex subunit NEMF OS=Homo sapiens OX=9606 GN=NEMF PE=1 SV=4	0	56.445	18	14	149	14	1076	122.9	6.35	65.68	14	0	1.04823	0.791593	1.12062	1.04303	0.723647	0.203395	0.957543	0.826115	0.772137
Q16822	PCK2	1.11381	1.05561	0.0879816	0.216904	0.155507			2.24654		PEPCK2	Phosphoenolpyruvate carboxykinase [GTP], mitochondrial OS=Homo sapiens OX=9606 GN=PCK2 PE=1 SV=4	0	56.38	26	14	262	14	640	70.7	7.62	114.38	14	0	2.71305	2.63831	2.79155	2.66332	2.7229	2.76139	2.60238	2.62114	2.45287
P62241	RPS8	1.11316	0.346956	0.449825	0.6773	0.154657			0.83672			Small ribosomal subunit protein eS8 OS=Homo sapiens OX=9606 GN=RPS8 PE=1 SV=2	0	56.377	48	11	742	11	208	24.2	10.32	357	11	0	6.68921	6.51712	6.49919	6.30163	6.13924	6.33943	6.72332	6.11891	6.39932
P40227	CCT6A	1.45338	0.933912	0.116436	0.264905	0.539409			1.99759		CCT6 CCTZ	T-complex protein 1 subunit zeta OS=Homo sapiens OX=9606 GN=CCT6A PE=1 SV=3	0	56.192	28	12	211	9	531	58	6.68	90.76	12	2	2.99681	2.90822	2.95471	2.89663	2.86792	2.73296	2.6587	1.87689	2.70591
Q9Y4W6	AFG3L2	0.943777	0.14793	0.711328	0.865482	-0.0834827			-0.397456			AFG3-like protein 2 OS=Homo sapiens OX=9606 GN=AFG3L2 PE=1 SV=2	0	56.151	21	15	215	15	797	88.5	8.66	84.69	15	0	1.19712	1.73575	1.58852	0.558375	0.731806	0.744491	1.33501	1.79492	1.64192
Q9NZN4	EHD2	1.11832	0.412761	0.38658	0.61754	0.161335			0.970893		PAST2	EH domain-containing protein 2 OS=Homo sapiens OX=9606 GN=EHD2 PE=1 SV=2	0	56.039	33	14	238	12	543	61.1	6.46	84.48	14	2	2.28238	2.23549	2.06161	2.55129	2.29953	2.34585	1.78624	1.99945	2.30978
O75179	ANKRD17	1.16885	1.34811	0.0448629	0.147264	0.225091			2.88332		GTAR KIAA0697	Ankyrin repeat domain-containing protein 17 OS=Homo sapiens OX=9606 GN=ANKRD17 PE=1 SV=3	0	55.965	6	14	235	6	2603	274.1	6.52	106.81	14	0	-0.93774	-0.707231	-0.701681	-2.17877	-1.9017	-1.58099	-1.0027	-0.998706	-1.02052
Q9H2U1	DHX36	1.66614	1.68812	0.0205059	0.107899	0.736509			3.71825		DDX36 KIAA1488 MLEL1 RHAU	ATP-dependent DNA/RNA helicase DHX36 OS=Homo sapiens OX=9606 GN=DHX36 PE=1 SV=2	0	55.938	18	12	114	12	1008	114.7	7.68	40.43	12	0	0.804169	0.633124	0.218107	0.516436	0.382523	-0.119178	-0.2753	-0.283374	0.00454549
P62750	RPL23A	1.02137	0.0497122	0.891842	0.950026	0.0305112			0.144841			Large ribosomal subunit protein uL23 OS=Homo sapiens OX=9606 GN=RPL23A PE=1 SV=1	0	55.899	45	9	505	9	156	17.7	10.45	216.15	9	0	6.17673	5.91913	6.02967	5.79239	5.5436	5.76849	6.33683	5.65633	6.04082
Q96S55	WRNIP1	0.89874	0.269397	0.537778	0.746238	-0.154024			-0.673088		WHIP	ATPase WRNIP1 OS=Homo sapiens OX=9606 GN=WRNIP1 PE=1 SV=2	0	55.895	24	12	199	12	665	72.1	6.1	88.64	12	0	2.5675	1.94958	2.12183	2.52562	2.31883	2.34311	2.45795	2.0997	2.54333
P05787	KRT8	0.772232	0.387091	0.410118	0.640585	-0.372894			-0.918958		CYK8	Keratin, type II cytoskeletal 8 OS=Homo sapiens OX=9606 GN=KRT8 PE=1 SV=7	0	55.754	24	15	329	9	483	53.7	5.59	155.63	15	0	1.02944	1.65248	1.08581	1.13305	0.979967	1.12597	1.18825	2.32831	1.36985
Q9NSE4	IARS2	1.03267	0.167258	0.680365	0.850151	0.046376			0.443458			Isoleucine--tRNA ligase, mitochondrial OS=Homo sapiens OX=9606 GN=IARS2 PE=1 SV=2	0	55.745	19	14	183	14	1012	113.7	7.2	63.73	14	0	0.363043	0.567308	0.528378	0.189111	0.391976	0.188491	0.392996	0.32402	0.602584
Q9Y4B5	MTCL1	0.817871	0.179217	0.661885	0.845641	-0.290056			-0.471448		CCDC165 KIAA0802 SOGA2	Microtubule cross-linking factor 1 OS=Homo sapiens OX=9606 GN=MTCL1 PE=1 SV=5	0	55.671	12	17	127	15	1905	209.4	6.43	35.05	17	0	-2.19439	-3.81199	-1.95893	-2.72019	-2.12736	-2.23705	-2.03946	-2.33183	-2.72385
P01889	HLA-B	1.0533	0.124413	0.750909	0.885772	0.0749184			0.340074		HLAB	HLA class I histocompatibility antigen, B alpha chain OS=Homo sapiens OX=9606 GN=HLA-B PE=1 SV=3	0	55.373	36	11	414	6	362	40.4	5.85	195.46	11	4	4.98313	4.74006	4.58251	5.43075	5.27534	5.53427	4.9847	4.34482	4.75142
Q5VYK3	ECPAS	2.63371	0.469387	0.339323	0.575444	1.3971			1.08403		ECM29 KIAA0368	Proteasome adapter and scaffold protein ECM29 OS=Homo sapiens OX=9606 GN=ECPAS PE=1 SV=2	0	55.369	11	15	151	15	1845	204.2	7.12	60.09	15	0	-1.29755	0.140301	-0.345873	0.603522	0.25985	0.21765	-4.29673	-0.333915	-1.06377
O15371	EIF3D	1.03697	0.147199	0.712527	0.866005	0.0523765			0.395696		EIF3S7	Eukaryotic translation initiation factor 3 subunit D OS=Homo sapiens OX=9606 GN=EIF3D PE=1 SV=1	0	55.349	37	12	272	12	548	63.9	6.05	133.93	12	0	3.02151	2.81164	3.18324	3.00955	3.12729	2.82193	2.92629	3.09804	2.83492
P36873	PPP1CC	0.803583	0.644137	0.226915	0.425447	-0.31548			-1.42637			Serine/threonine-protein phosphatase PP1-gamma catalytic subunit OS=Homo sapiens OX=9606 GN=PPP1CC PE=1 SV=1	0	55.281	43	10	260	1	323	37	6.54	96.66	10	0	-1.11027	-0.741889	-0.384876	-0.574269	-0.521715	-0.430394	-0.492954	-0.28816	-0.509478
Q2M389	WASHC4	0.870812	0.499938	0.316273	0.55031	-0.199567			-1.14443		KIAA1033	WASH complex subunit 4 OS=Homo sapiens OX=9606 GN=WASHC4 PE=1 SV=2	0	55.198	15	16	164	16	1173	136.3	7.44	52.06	16	0	0.335295	0.62236	0.829408	0.802734	0.741687	0.839649	0.993082	0.678919	0.713761
Q9BRZ2	TRIM56	0.722518	1.29511	0.0506863	0.161633	-0.468894			-2.76314		RNF109	E3 ubiquitin-protein ligase TRIM56 OS=Homo sapiens OX=9606 GN=TRIM56 PE=1 SV=3	0	55.187	29	14	175	14	755	81.4	7.74	60.42	14	0	2.56149	2.41529	2.69499	2.02648	1.94508	2.35801	3.29694	2.78202	2.9995
Q86XX4	FRAS1	0.975183	0.109593	0.776974	0.8914	-0.0362547			-0.303028		KIAA1500	Extracellular matrix organizing protein FRAS1 OS=Homo sapiens OX=9606 GN=FRAS1 PE=1 SV=2	0	55.117	5	15	116	15	4008	442.9	5.57	37.6	15	0	0.719871	0.52196	0.537841	0.816272	1.02409	1.06663	0.768137	0.431971	0.688328
Q12789	GTF3C1	0.938293	0.0192288	0.95669	0.978626	-0.0918899			-0.057787			General transcription factor 3C polypeptide 1 OS=Homo sapiens OX=9606 GN=GTF3C1 PE=1 SV=4	0	54.815	10	15	115	15	2109	238.7	7.3	29.37	15	0	-2.13903	1.13057	1.0277	2.32422	2.24749	2.65693	1.35934	-2.24634	1.18191
Q96AG4	LRRC59	1.14027	0.447977	0.35647	0.5928	0.189373			1.04145			Leucine-rich repeat-containing protein 59 OS=Homo sapiens OX=9606 GN=LRRC59 PE=1 SV=1	0	54.813	49	12	236	12	307	34.9	9.57	107.54	12	0	3.57438	3.83552	3.63173	2.81109	2.5056	2.62542	3.81245	3.2763	3.38476
P13010	XRCC5	1.05668	0.145176	0.715853	0.868357	0.0795342			0.39082		G22P2	X-ray repair cross-complementing protein 5 OS=Homo sapiens OX=9606 GN=XRCC5 PE=1 SV=3	0	54.767	21	14	240	14	732	82.7	5.81	104.82	14	0	2.14614	2.26092	2.36172	3.15949	2.598	2.76773	2.56152	1.94487	2.02378
Q9HD20	ATP13A1	1.16351	0.272888	0.533472	0.744274	0.218484			0.680616		ATP13A KIAA1825	Endoplasmic reticulum transmembrane helix translocase OS=Homo sapiens OX=9606 GN=ATP13A1 PE=1 SV=2	0	54.716	14	13	148	13	1204	132.9	8.13	46.29	13	0	-0.437962	-0.900525	-0.884086	-0.370571	0.057676	-0.159064	-1.52521	-0.686925	-0.665894
Q969V3	NCLN	1.08182	0.326425	0.471601	0.694547	0.113456			0.794075			BOS complex subunit NCLN OS=Homo sapiens OX=9606 GN=NCLN PE=1 SV=2	0	54.665	23	10	218	10	563	62.9	6.89	76.94	10	0	1.28961	1.3244	1.38913	1.93375	1.83333	1.63486	1.40355	0.946098	1.31313
P08581	MET	1.05791	0.10387	0.787281	0.897082	0.0812202			0.288522			Hepatocyte growth factor receptor OS=Homo sapiens OX=9606 GN=MET PE=1 SV=4	0	54.557	13	14	186	14	1390	155.4	7.33	76.33	14	0	1.30137	1.05902	0.534563	1.26722	1.22738	1.45996	1.18722	0.609391	0.854684
Q9NZV1	CRIM1	0.58535	1.70263	0.0198323	0.107516	-0.772628			-3.75666		S52	Cysteine-rich motor neuron 1 protein OS=Homo sapiens OX=9606 GN=CRIM1 PE=1 SV=1	0	54.493	15	14	153	14	1036	113.7	5.21	77.06	14	0	1.4585	1.35562	1.8967	1.23542	1.19053	1.63117	2.41892	2.5049	2.10489
P54652	HSPA2	0.976063	0.080643	0.830533	0.922261	-0.0349545			-0.228405			Heat shock-related 70 kDa protein 2 OS=Homo sapiens OX=9606 GN=HSPA2 PE=1 SV=1	0	54.428	16	11	491	6	639	70	5.74	213.81	11	0	5.85007	5.86193	5.69738	5.86768	5.7252	6.08997	6.08106	5.58407	5.84912
P63104	YWHAZ	0.942728	0.577234	0.264707	0.476768	-0.0850866			-1.29597			14-3-3 protein zeta/delta OS=Homo sapiens OX=9606 GN=YWHAZ PE=1 SV=1	0	54.374	58	13	246	10	245	27.7	4.79	121.11	13	1	3.27133	3.19062	3.37967	3.06263	3.27887	3.45063	3.37905	3.29729	3.42055
Q9UKV8	AGO2	1.01949	0.0674658	0.856119	0.935961	0.027853			0.193332		EIF2C2	Protein argonaute-2 OS=Homo sapiens OX=9606 GN=AGO2 PE=1 SV=3	0	54.237	19	12	229	7	859	97.1	9.19	89.91	12	2	1.93188	1.75022	2.10423	0.834501	1.13857	0.617087	1.95852	2.04077	1.70348
P22626	HNRNPA2B1	1.06218	0.496926	0.318474	0.554114	0.0870253			1.13849		HNRPA2B1	Heterogeneous nuclear ribonucleoproteins A2/B1 OS=Homo sapiens OX=9606 GN=HNRNPA2B1 PE=1 SV=2	0	54.192	41	13	399	12	353	37.4	8.95	209.66	13	0	4.5331	4.53788	4.59945	4.4786	4.47365	4.65215	4.6106	4.36348	4.43528
P15880	RPS2	1.18345	0.621457	0.23908	0.440498	0.243003			1.3822		RPS4	Small ribosomal subunit protein uS5 OS=Homo sapiens OX=9606 GN=RPS2 PE=1 SV=2	0	54.15	40	11	594	11	293	31.3	10.24	308.38	11	0	6.41662	6.34447	6.24055	5.82423	5.74063	5.54008	6.2065	5.75945	6.30668
Q9UKV3	ACIN1	1.81719	1.92655	0.0118426	0.103508	0.861706			4.38348	+	ACINUS KIAA0670	Apoptotic chromatin condensation inducer in the nucleus OS=Homo sapiens OX=9606 GN=ACIN1 PE=1 SV=2	0	54.026	14	14	186	14	1341	151.8	6.43	64.34	14	0	1.08965	1.24693	1.35441	1.56923	1.26234	1.16195	0.729047	0.160657	0.216162
Q15386	UBE3C	0.97119	0.229627	0.58935	0.794921	-0.042175			-0.585995		KIAA0010 KIAA10	Ubiquitin-protein ligase E3C OS=Homo sapiens OX=9606 GN=UBE3C PE=1 SV=3	0	54.018	14	14	191	14	1083	123.8	6.71	81.43	14	0	0.788719	0.669264	0.861715	0.803913	1.31651	1.07528	0.763659	0.777312	0.905251
O75083	WDR1	1.51131	0.728214	0.186976	0.374587	0.595798			1.59029			WD repeat-containing protein 1 OS=Homo sapiens OX=9606 GN=WDR1 PE=1 SV=4	0	53.994	32	12	173	12	606	66.2	6.65	67.34	12	0	0.705437	1.60814	0.801903	1.37863	1.24979	1.41576	0.228282	0.174525	0.925274
Q9ULX3	NOB1	0.634446	2.14834	0.00710657	0.087903	-0.65643			-5.07479	+	ART4 NOB1P PSMD8BP1	RNA-binding protein NOB1 OS=Homo sapiens OX=9606 GN=NOB1 PE=1 SV=1	0	53.562	25	11	285	11	412	46.6	7.18	142.77	11	0	2.93838	3.15654	3.17256	2.20251	2.01175	2.08747	3.78216	3.90641	3.5482
P06493	CDK1	1.10215	0.527522	0.29681	0.522833	0.140318			1.19868		CDC2 CDC28A CDKN1 P34CDC2	Cyclin-dependent kinase 1 OS=Homo sapiens OX=9606 GN=CDK1 PE=1 SV=3	0	53.347	48	10	315	9	297	34.1	8.4	139.92	10	1	3.742	3.70965	3.5161	3.47371	3.74237	3.69851	3.68562	3.36347	3.4977
Q86SQ0	PHLDB2	0.625478	1.08657	0.0819267	0.205774	-0.676968			-2.31117		LL5B	Pleckstrin homology-like domain family B member 2 OS=Homo sapiens OX=9606 GN=PHLDB2 PE=1 SV=2	0	53.342	14	15	131	15	1253	142.1	7.43	40.81	15	0	0.193699	0.2904	0.885293	-2.75016	-1.10279	-0.814459	1.0827	1.49821	0.819385
P33176	KIF5B	1.33753	1.7255	0.0188147	0.106275	0.419571			3.81774		KNS KNS1	Kinesin-1 heavy chain OS=Homo sapiens OX=9606 GN=KIF5B PE=1 SV=1	0	53.274	21	15	114	15	963	109.6	6.51	40.35	15	0	0.347259	0.583569	0.336081	0.541594	-0.541481	-0.62573	0.11329	0.0342321	-0.139326
P62140	PPP1CB	0.765066	1.0199	0.0955203	0.227617	-0.386343			-2.17271			Serine/threonine-protein phosphatase PP1-beta catalytic subunit OS=Homo sapiens OX=9606 GN=PPP1CB PE=1 SV=3	0	53.065	42	10	214	3	327	37.2	6.19	76.65	10	0	-1.47995	-1.76633	-1.18679	-2.00496	-1.31013	-0.936492	-1.05264	-1.2095	-1.01191
Q9H5V8	CDCP1	1.20017	0.540788	0.287881	0.510264	0.263234			1.2247		TRASK	CUB domain-containing protein 1 OS=Homo sapiens OX=9606 GN=CDCP1 PE=1 SV=3	0	53.061	15	13	270	13	836	92.9	7.96	129.93	13	0	2.22836	1.87126	1.90802	2.49499	2.47025	2.23274	2.02573	1.39992	1.79229
P08865	RPSA	1.19221	0.990364	0.102244	0.240558	0.253633			2.11214		LAMBR LAMR1	Small ribosomal subunit protein uS2 OS=Homo sapiens OX=9606 GN=RPSA PE=1 SV=4	0	52.851	43	9	355	9	295	32.8	4.87	177.06	9	0	4.51062	4.85961	4.66551	4.37664	4.06588	4.36823	4.55485	4.35495	4.36504
P98175	RBM10	0.855112	1.22644	0.0593689	0.170441	-0.225815			-2.61082		DXS8237E GPATC9 GPATCH9 KIAA0122	RNA-binding protein 10 OS=Homo sapiens OX=9606 GN=RBM10 PE=1 SV=3	0	52.839	17	13	196	10	930	103.5	5.97	82.71	13	1	1.67153	1.45938	1.65939	1.25842	1.14911	1.33117	1.75476	1.92577	1.78721
Q8WUQ7	CACTIN	30.4559	1.69757	0.0200648	0.108194	4.92865			3.74322	+	C19orf29	Splicing factor Cactin OS=Homo sapiens OX=9606 GN=CACTIN PE=1 SV=3	0	52.801	23	13	95	13	758	88.6	9.14	32.55	13	0	1.42287	1.39597	1.74192	0.984855	0.722532	0.860021	-2.09717	-2.09565	-6.03238
P12236	SLC25A6	1.20721	1.16196	0.0688712	0.187921	0.271675			2.47102		AAC3 ANT3	ADP/ATP translocase 3 OS=Homo sapiens OX=9606 GN=SLC25A6 PE=1 SV=4	0	52.758	42	12	500	3	298	32.8	9.74	272.33	12	1	2.8043	2.77998	2.6554	2.20055	2.26385	2.20097	2.55259	2.2768	2.59527
Q15417	CNN3	0.44009	1.96582	0.0108189	0.108038	-1.18413			-4.50044	+		Calponin-3 OS=Homo sapiens OX=9606 GN=CNN3 PE=1 SV=1	0	52.743	36	11	237	10	329	36.4	6.05	111.64	11	0	2.29098	2.33584	2.74139	1.97508	2.64093	2.4615	3.29454	4.05076	3.57529
P46776	RPL27A	1.13698	0.323017	0.475317	0.696788	0.185206			0.786953			Large ribosomal subunit protein uL15 OS=Homo sapiens OX=9606 GN=RPL27A PE=1 SV=2	0	52.667	33	8	783	8	148	16.6	11	389.65	8	0	7.11598	7.01077	6.98371	6.77369	6.63923	6.90941	7.23598	6.43476	6.8841
Q9H4M9	EHD1	1.29529	1.79089	0.0161848	0.104261	0.373272			3.99593		PAST PAST1	EH domain-containing protein 1 OS=Homo sapiens OX=9606 GN=EHD1 PE=1 SV=2	0	52.664	33	13	127	11	534	60.6	6.83	47.16	13	2	1.89755	1.7551	1.71703	2.13503	2.29145	2.38393	1.34933	1.3331	1.56743
Q96GA3	LTV1	0.855342	0.204563	0.624362	0.817409	-0.225427			-0.529691		C6orf93	Protein LTV1 homolog OS=Homo sapiens OX=9606 GN=LTV1 PE=1 SV=1	0	52.394	26	12	166	12	475	54.8	4.91	67.51	12	0	5.64791	5.21892	6.06057	5.44791	6.043	6.43398	6.18416	5.17011	6.24941
Q96HS1	PGAM5	1.07707	0.253723	0.557541	0.763909	0.107107			0.639066			Serine/threonine-protein phosphatase PGAM5, mitochondrial OS=Homo sapiens OX=9606 GN=PGAM5 PE=1 SV=2	0	52.335	37	10	279	10	289	32	8.68	123.35	10	0	3.84632	3.69595	3.67385	3.12488	2.87863	3.11699	3.83613	3.31936	3.7393
Q8IWX8	CHERP	1.5992	2.02897	0.00935468	0.0950899	0.677352			4.69332	+	DAN26 SCAF6	Calcium homeostasis endoplasmic reticulum protein OS=Homo sapiens OX=9606 GN=CHERP PE=1 SV=3	0	52.312	16	11	162	11	916	103.6	9.04	52	11	0	1.35391	1.05643	1.43722	1.1041	0.708616	1.20719	0.499587	0.776505	0.539411
P18621	RPL17	1.04953	0.102731	0.789348	0.898297	0.0697374			0.285621			Large ribosomal subunit protein uL22 OS=Homo sapiens OX=9606 GN=RPL17 PE=1 SV=3	0	52.285	39	10	351	10	184	21.4	10.17	217.05	10	0	5.9061	5.63428	5.57269	5.52469	5.28693	5.31096	5.9513	5.20766	5.74489
Q00653	NFKB2	0.670932	3.16994	0.000676177	0.0819259	-0.575761			-9.53281	+	LYT10	Nuclear factor NF-kappa-B p100 subunit OS=Homo sapiens OX=9606 GN=NFKB2 PE=1 SV=4	0	52.229	20	13	140	13	900	96.7	6.25	44.57	13	0	0.473873	0.571548	0.597166	0.905365	0.311868	0.471607	1.18784	1.03114	1.15089
O95425	SVIL	1.05427	0.0498168	0.891627	0.949931	0.0762395			0.145131			Supervillin OS=Homo sapiens OX=9606 GN=SVIL PE=1 SV=2	0	52.189	10	13	78	13	2214	247.6	6.98	27.7	13	0	-1.73902	-0.035688	-1.30346	-3.50264	-1.71235	-1.84084	-1.14209	-0.873514	-1.29129
O43172	PRPF4	0.901755	0.370084	0.426497	0.659447	-0.149192			-0.884278		PRP4	U4/U6 small nuclear ribonucleoprotein Prp4 OS=Homo sapiens OX=9606 GN=PRPF4 PE=1 SV=2	0	52.113	34	13	191	13	522	58.4	7.42	68.48	13	0	0.624195	0.632409	1.10442	1.07145	0.918277	0.369437	1.03807	0.930361	0.840166
Q6PGP7	SKIC3	1.17085	0.316598	0.482394	0.704242	0.227552			0.773507		KIAA0372 TTC37	Superkiller complex protein 3 OS=Homo sapiens OX=9606 GN=SKIC3 PE=1 SV=1	0	52.098	11	14	118	14	1564	175.4	7.53	36.37	14	0	0.735041	0.694462	0.300277	1.0307	0.534517	0.76201	0.751543	-0.135846	0.431426
P06576	ATP5F1B	0.912581	1.62983	0.0234517	0.112402	-0.131976			-3.56637		ATP5B ATPMB ATPSB	ATP synthase subunit beta, mitochondrial OS=Homo sapiens OX=9606 GN=ATP5F1B PE=1 SV=3	0	52.097	33	11	235	11	529	56.5	5.4	101.12	11	0	3.30745	3.33644	3.22628	3.1608	3.13802	3.23101	3.42449	3.39177	3.44984
Q96II8	LRCH3	0.858795	1.92306	0.0119383	0.102733	-0.219614			-4.37319			DISP complex protein LRCH3 OS=Homo sapiens OX=9606 GN=LRCH3 PE=1 SV=2	0	52.046	29	15	115	14	777	86	6.71	44.58	15	1	0.537556	0.605783	0.437589	0.229026	0.163804	-0.0895914	0.725524	0.765869	0.748376
P11388	TOP2A	0.837005	2.26913	0.00538107	0.0899237	-0.256692			-5.48495		TOP2	DNA topoisomerase 2-alpha OS=Homo sapiens OX=9606 GN=TOP2A PE=1 SV=3	0	52.022	10	13	199	13	1531	174.3	8.72	78.41	13	0	1.17724	1.12151	1.15086	0.379802	0.942919	0.301262	1.45981	1.31938	1.4405
P35222	CTNNB1	1.13324	0.130235	0.740909	0.881906	0.180454			0.354435		CTNNB	Catenin beta-1 OS=Homo sapiens OX=9606 GN=CTNNB1 PE=1 SV=1	0	51.982	20	11	192	10	781	85.4	5.86	80.09	11	0	1.18782	-0.200399	-0.142339	0.176109	-0.170168	-0.0297334	0.351457	-0.361582	0.313844
Q12802	AKAP13	1.02782	0.102279	0.790171	0.898184	0.0395917			0.284469		BRX HT31 LBC	A-kinase anchor protein 13 OS=Homo sapiens OX=9606 GN=AKAP13 PE=1 SV=2	0	51.776	6	14	136	14	2813	307.4	5.24	52.49	14	0	0.520968	0.284844	0.44618	0.895318	0.620196	0.887522	0.614579	0.220866	0.297772
P04049	RAF1	0.970746	0.108146	0.779568	0.893948	-0.0428348			-0.29937		RAF	RAF proto-oncogene serine/threonine-protein kinase OS=Homo sapiens OX=9606 GN=RAF1 PE=1 SV=1	0	51.766	26	12	205	9	648	73	9.2	91.11	12	3	1.17993	1.23256	0.932377	1.50789	1.20601	1.31281	0.956042	1.18657	1.33076
Q86UP2	KTN1	1.00589	0.0191516	0.95686	0.978529	0.00847844			0.0575598		CG1 KIAA0004	Kinectin OS=Homo sapiens OX=9606 GN=KTN1 PE=1 SV=1	0	51.562	13	14	112	14	1357	156.2	5.64	33.61	14	0	0.960569	0.787106	0.850761	0.273557	-0.1281	-0.00890903	1.00943	0.581496	0.982071
O60271	SPAG9	0.118027	1.79991	0.0158521	0.1045	-3.08281			-4.02094	+	HSS KIAA0516 MAPK8IP4 SYD1	C-Jun-amino-terminal kinase-interacting protein 4 OS=Homo sapiens OX=9606 GN=SPAG9 PE=1 SV=4	0	51.514	13	14	61	14	1321	146.1	5.15	20.44	14	0	-4.1924	-2.62085	-1.81246	-3.72138	-1.72649	-2.75098	-0.287097	0.794551	0.11527
Q9BZF1	OSBPL8	1.09885	0.791645	0.161568	0.335329	0.135996			1.7146		KIAA1451 ORP8 OSBP10	Oxysterol-binding protein-related protein 8 OS=Homo sapiens OX=9606 GN=OSBPL8 PE=1 SV=3	0	51.433	15	12	168	10	889	101.1	6.96	67.78	12	1	1.2702	1.11461	1.15005	1.23045	0.860647	1.49648	1.07775	0.918353	1.13077
P56192	MARS1	0.841397	1.98571	0.0103345	0.108433	-0.249141			-4.56056		MARS	Methionine--tRNA ligase, cytoplasmic OS=Homo sapiens OX=9606 GN=MARS1 PE=1 SV=2	0	51.43	18	11	129	11	900	101.1	6.16	49.05	11	0	1.05205	1.05551	1.08757	0.907368	1.47486	1.29674	1.41408	1.2972	1.23128
Q06787	FMR1	1.41922	1.95317	0.0111385	0.105303	0.505096			4.46254			Fragile X messenger ribonucleoprotein 1 OS=Homo sapiens OX=9606 GN=FMR1 PE=1 SV=1	0	51.428	24	12	198	11	632	71.1	7.42	85.37	12	0	1.39739	1.2724	1.5491	0.48211	0.380443	0.331302	0.880316	0.774149	1.04914
P07237	P4HB	0.908692	0.792333	0.161312	0.335338	-0.138136			-1.71595		ERBA2L PDI PDIA1 PO4DB	Protein disulfide-isomerase OS=Homo sapiens OX=9606 GN=P4HB PE=1 SV=3	0	51.423	29	13	231	13	508	57.1	4.87	105.52	13	0	1.53994	1.72092	1.78209	2.43556	2.45853	2.67318	1.86295	1.84351	1.75089
O75330	HMMR	0.650857	1.07259	0.0846086	0.210428	-0.619589			-2.28191		IHABP RHAMM	Hyaluronan mediated motility receptor OS=Homo sapiens OX=9606 GN=HMMR PE=1 SV=2	0	51.406	22	15	109	15	724	84	5.83	42.08	15	0	0.982676	1.4772	1.56453	0.0249935	0.591009	-0.00399165	1.88148	2.34431	1.65738
Q16513	PKN2	1.30803	0.43663	0.365906	0.601844	0.387397			1.0188		PRK2 PRKCL2	Serine/threonine-protein kinase N2 OS=Homo sapiens OX=9606 GN=PKN2 PE=1 SV=1	0	51.292	18	14	145	14	984	112	6.3	52.24	14	0	0.0587902	0.941773	0.38204	-0.326516	-0.502475	-0.32096	0.570615	0.0458723	-0.396074
P62280	RPS11	1.22406	0.345192	0.451656	0.6774	0.29167			0.833072			Small ribosomal subunit protein uS17 OS=Homo sapiens OX=9606 GN=RPS11 PE=1 SV=3	0	51.214	33	9	357	9	158	18.4	10.3	175.97	9	0	5.87138	5.758	5.15381	4.98272	4.81931	5.78677	5.27644	4.84851	5.78322
Q13610	PWP1	1.25501	0.659193	0.219183	0.41885	0.327698			1.45569			Periodic tryptophan protein 1 homolog OS=Homo sapiens OX=9606 GN=PWP1 PE=1 SV=1	0	51.09	33	10	204	10	501	55.8	4.77	83.92	10	0	2.19512	1.86905	2.22102	2.4396	2.52511	2.66823	1.43652	1.75542	2.11015
Q9ULV4	CORO1C	1.57415	0.530102	0.295051	0.520812	0.654571			1.20375		CRN2 CRNN4	Coronin-1C OS=Homo sapiens OX=9606 GN=CORO1C PE=1 SV=1	0	51.084	22	11	93	11	474	53.2	7.08	39.53	11	0	0.517971	1.97675	0.460431	0.0679396	0.280977	0.573066	-0.070402	0.698635	0.363205
Q9UK22	FBXO2	1.40394	0.757106	0.174942	0.357156	0.489477			1.64681		FBX2	F-box only protein 2 OS=Homo sapiens OX=9606 GN=FBXO2 PE=1 SV=2	0	50.964	53	9	171	9	296	33.3	4.37	74.41	9	0	2.30816	2.45188	2.21568	2.12085	2.29825	2.33407	2.31736	1.31763	1.8723
Q9BTV4	TMEM43	1.07093	0.268867	0.538434	0.746271	0.0988607			0.671944			Transmembrane protein 43 OS=Homo sapiens OX=9606 GN=TMEM43 PE=1 SV=1	0	50.912	37	9	203	9	400	44.8	8.13	69.94	9	0	2.40714	2.45039	2.10807	3.1455	3.28607	3.38912	2.25665	2.03489	2.37747
O00541	PES1	1.20739	0.97528	0.105857	0.24413	0.271887			2.08138			Pescadillo homolog OS=Homo sapiens OX=9606 GN=PES1 PE=1 SV=1	0	50.855	23	13	259	13	588	68	7.33	114.15	13	0	1.96928	1.89722	1.84093	1.56684	1.68693	1.60631	1.64684	1.406	1.83892
Q6PD62	CTR9	1.23837	1.356	0.0440552	0.147405	0.308446			2.90142		KIAA0155 SH2BP1	RNA polymerase-associated protein CTR9 homolog OS=Homo sapiens OX=9606 GN=CTR9 PE=1 SV=1	0	50.789	15	14	148	14	1173	133.4	6.77	51.64	14	0	1.03355	1.10944	0.910256	0.906926	0.91845	0.518811	0.879926	0.579669	0.668306
Q13049	TRIM32	1.50382	2.03716	0.00918001	0.095016	0.588628			4.71876		HT2A	E3 ubiquitin-protein ligase TRIM32 OS=Homo sapiens OX=9606 GN=TRIM32 PE=1 SV=2	0	50.783	32	14	107	14	653	71.9	6.98	35.18	14	0	0.147615	0.0530357	0.435075	0.416376	0.740363	0.15224	-0.39015	-0.453417	-0.286591
O00560	SDCBP	1.37738	0.541316	0.28753	0.510206	0.46193			1.22573		MDA9 SYCL	Syntenin-1 OS=Homo sapiens OX=9606 GN=SDCBP PE=1 SV=1	0	50.773	48	9	283	9	298	32.4	7.53	100.85	9	0	4.63921	4.38255	4.13965	4.86372	4.60991	4.65787	4.27079	3.22887	4.27595
Q15424	SAFB	0.878669	0.207192	0.620595	0.817887	-0.186608			-0.535653		HAP HET SAFB1	Scaffold attachment factor B1 OS=Homo sapiens OX=9606 GN=SAFB PE=1 SV=4	0	50.695	14	11	140	3	915	102.6	5.47	55.91	11	0	-0.755897	-1.3172	-0.193024	0.227437	-0.629407	-0.079386	-0.366182	-0.538273	-0.801848
P18669	PGAM1	1.1072	0.280199	0.524568	0.736718	0.146911			0.696325		PGAMA	Phosphoglycerate mutase 1 OS=Homo sapiens OX=9606 GN=PGAM1 PE=1 SV=2	0	50.627	57	10	188	10	254	28.8	7.18	71.91	10	0	2.32091	2.53061	1.95117	2.9854	2.79523	2.72408	2.3107	1.88288	2.16837
Q9BZH6	WDR11	1.99413	0.801611	0.157902	0.329553	0.99576			1.73421		BRWD2 KIAA1351 WDR15	WD repeat-containing protein 11 OS=Homo sapiens OX=9606 GN=WDR11 PE=1 SV=1	0	50.625	15	13	138	13	1224	136.6	6.92	50.15	13	0	-1.00649	-1.82218	-0.374568	-0.46607	0.242751	0.0145899	-2.71918	-2.10974	-1.3616
Q14527	HLTF	1.2505	1.71546	0.0192548	0.107347	0.322504			3.79085		HIP116A RNF80 SMARCA3 SNF2L3 ZBU1	Helicase-like transcription factor OS=Homo sapiens OX=9606 GN=HLTF PE=1 SV=2	0	50.597	16	13	173	13	1009	113.9	8.6	73.52	13	0	0.668882	0.68541	0.585162	0.526285	0.344459	0.525658	0.417393	0.166461	0.38809
P46531	NOTCH1	0.890623	0.11732	0.763273	0.888085	-0.167113			-0.322434		TAN1	Neurogenic locus notch homolog protein 1 OS=Homo sapiens OX=9606 GN=NOTCH1 PE=1 SV=4	0	50.567	6	11	129	11	2555	272.3	5.12	38.92	11	0	-0.893188	-1.18582	-2.30317	-2.02516	-0.967777	-2.49559	-0.715006	-1.61583	-1.55001
Q8NB90	AFG2A	1.17526	0.208884	0.618181	0.816884	0.232977			0.539484		SPAF SPATA5	ATPase family gene 2 protein homolog A OS=Homo sapiens OX=9606 GN=AFG2A PE=1 SV=3	0	50.421	18	13	218	13	893	97.8	5.66	98.67	13	0	0.142322	0.406903	-0.417562	-0.67885	0.417346	0.2853	0.13118	-0.901812	0.203365
Q9NQ29	LUC7L	0.830979	0.57221	0.267788	0.481682	-0.267115			-1.28616		LUC7L1	Putative RNA-binding protein Luc7-like 1 OS=Homo sapiens OX=9606 GN=LUC7L PE=1 SV=1	0	50.358	27	10	208	4	371	43.7	9.92	91.41	10	0	0.756813	0.823213	0.991351	0.485165	0.502109	0.121391	0.813313	1.48532	1.07409
Q10471	GALNT2	1.11645	0.181809	0.657947	0.843012	0.158915			0.477469			Polypeptide N-acetylgalactosaminyltransferase 2 OS=Homo sapiens OX=9606 GN=GALNT2 PE=1 SV=1	0	50.309	27	12	156	12	571	64.7	8.35	55.67	12	0	-0.540978	0.417099	0.331831	1.43721	1.12347	1.36761	-0.0313224	-0.339221	0.101751
P07195	LDHB	1.10093	0.508336	0.310216	0.542878	0.138716			1.16097			L-lactate dehydrogenase B chain OS=Homo sapiens OX=9606 GN=LDHB PE=1 SV=2	0	50.3	34	11	216	10	334	36.6	6.05	109.05	11	0	2.13659	2.26408	2.01014	1.74407	2.0276	2.01988	1.95333	1.86193	2.1794
P04075	ALDOA	1.20102	0.0945658	0.80433	0.907108	0.264261			0.264687		ALDA	Fructose-bisphosphate aldolase A OS=Homo sapiens OX=9606 GN=ALDOA PE=1 SV=2	0	50.259	39	10	147	9	364	39.4	8.09	54.25	10	1	-0.726039	2.31587	0.433885	0.731641	0.611639	0.0397767	-0.139227	1.32314	0.0470187
Q99661	KIF2C	1.13521	0.541866	0.287166	0.510018	0.182954			1.22681		KNSL6	Kinesin-like protein KIF2C OS=Homo sapiens OX=9606 GN=KIF2C PE=1 SV=2	0	50.245	22	13	122	12	725	81.3	7.83	45.98	13	0	0.447578	0.666095	0.763878	-1.95397	-1.51246	-1.8457	0.63163	0.465909	0.231151
Q3KQU3	MAP7D1	1.0508	0.092029	0.809042	0.908344	0.0714912			0.258133		KIAA1187 PARCC1 RPRC1	MAP7 domain-containing protein 1 OS=Homo sapiens OX=9606 GN=MAP7D1 PE=1 SV=1	0	50.238	18	11	159	11	841	92.8	10.11	67.37	11	0	1.38242	1.34215	1.22742	1.76127	1.65999	1.81483	1.67361	0.738008	1.3259
P55265	ADAR	0.97154	0.0742915	0.842769	0.927583	-0.0416548			-0.211592		ADAR1 DSRAD G1P1 IFI4	Double-stranded RNA-specific adenosine deaminase OS=Homo sapiens OX=9606 GN=ADAR PE=1 SV=4	0	50.236	12	13	135	13	1226	136	8.65	44.21	13	0	0.709932	0.569494	1.14887	1.26577	1.09689	1.3497	0.786997	1.03092	0.735347
Q9NZJ4	SACS	1.0805	0.154889	0.700021	0.861294	0.111694			0.414133		KIAA0730	Sacsin OS=Homo sapiens OX=9606 GN=SACS PE=1 SV=2	0	50.169	4	16	79	16	4579	520.8	7.05	22.5	16	0	0.384844	-0.0341141	0.472387	0.278505	0.858882	0.772636	0.233554	-0.248481	0.502962
Q02241	KIF23	1.24511	1.43	0.0371539	0.133934	0.31627			3.07383		KNSL5 MKLP1	Kinesin-like protein KIF23 OS=Homo sapiens OX=9606 GN=KIF23 PE=1 SV=3	0	50.154	16	13	176	13	960	110	8.51	65.98	13	0	1.49947	1.49931	1.35631	0.141196	0.555132	0.134308	1.02466	1.31624	1.06537
Q08945	SSRP1	1.15568	1.46422	0.0343381	0.12741	0.208736			3.15532		FACT80	FACT complex subunit SSRP1 OS=Homo sapiens OX=9606 GN=SSRP1 PE=1 SV=1	0	50.099	19	12	250	12	709	81	6.87	110.41	12	0	3.22146	3.16146	3.30415	2.91125	2.70499	2.93861	3.12237	2.98264	2.95585
O00203	AP3B1	1.05615	0.692016	0.203228	0.395319	0.0788095			1.51965		ADTB3A	AP-3 complex subunit beta-1 OS=Homo sapiens OX=9606 GN=AP3B1 PE=1 SV=3	0	50.043	12	12	236	12	1094	121.2	6.04	111.77	12	0	2.16526	2.19548	2.15873	2.12986	1.8416	2.28891	2.15072	1.99335	2.13896
Q8IZL8	PELP1	0.813489	1.22383	0.0597271	0.171542	-0.297806			-2.60509		HMX3 MNAR	Proline-, glutamic acid- and leucine-rich protein 1 OS=Homo sapiens OX=9606 GN=PELP1 PE=1 SV=2	0	49.756	14	10	140	10	1130	119.6	4.34	72.22	10	0	2.19069	2.18822	2.47676	2.52772	2.55006	2.73077	2.69671	2.57088	2.4815
P46783	RPS10	1.44237	1.62446	0.0237433	0.113018	0.52844			3.55259			Small ribosomal subunit protein eS10 OS=Homo sapiens OX=9606 GN=RPS10 PE=1 SV=1	0	49.736	56	10	505	10	165	18.9	10.15	218.14	10	0	5.17331	5.28622	5.11619	4.79886	4.81922	4.90637	4.91188	4.42697	4.65153
Q9Y265	RUVBL1	1.47069	2.25571	0.00554994	0.0900741	0.556489			5.43812	+	INO80H NMP238 TIP49 TIP49A	RuvB-like 1 OS=Homo sapiens OX=9606 GN=RUVBL1 PE=1 SV=1	0	49.732	33	11	323	11	456	50.2	6.42	158.03	11	0	3.48047	3.50089	3.71546	3.37367	3.19724	3.29061	3.11772	2.87983	3.0298
Q53EP0	FNDC3B	0.716134	1.37557	0.0421143	0.145146	-0.481699			-2.94653		FAD104 NS5ABP37	Fibronectin type III domain-containing protein 3B OS=Homo sapiens OX=9606 GN=FNDC3B PE=1 SV=2	0	49.684	15	13	170	13	1204	132.8	5.95	58.98	13	0	1.01891	1.26709	1.29231	0.933697	0.745746	1.01821	1.58165	1.94646	1.4953
Q9P270	SLAIN2	0.519282	1.90318	0.0124973	0.104285	-0.945409			-4.31493	+	KIAA1458	SLAIN motif-containing protein 2 OS=Homo sapiens OX=9606 GN=SLAIN2 PE=1 SV=2	0	49.664	25	11	220	11	581	62.5	9.45	103.35	11	0	2.22094	2.21639	2.68608	1.08925	1.15154	1.15501	3.32291	3.58515	3.05156
Q9UKM7	MAN1B1	1.37423	1.22155	0.0600414	0.171246	0.458627			2.60011			Endoplasmic reticulum mannosyl-oligosaccharide 1,2-alpha-mannosidase OS=Homo sapiens OX=9606 GN=MAN1B1 PE=1 SV=2	0	49.638	18	10	129	10	699	79.5	7.72	35.67	10	0	0.77696	0.933048	0.790776	1.43841	1.10771	0.99733	0.138985	0.282946	0.702973
P19784	CSNK2A2	1.29734	2.86299	0.00137093	0.0787273	0.375554			7.92688		CK2A2	Casein kinase II subunit alpha' OS=Homo sapiens OX=9606 GN=CSNK2A2 PE=1 SV=1	0	49.632	33	10	237	10	350	41.2	8.56	93.92	10	0	2.38386	2.35602	2.28384	2.35968	2.5348	2.32338	2.02277	1.97745	1.89683
P49736	MCM2	0.670574	1.60214	0.0249955	0.114553	-0.576532			-3.4956		BM28 CCNL1 CDCL1 KIAA0030	DNA replication licensing factor MCM2 OS=Homo sapiens OX=9606 GN=MCM2 PE=1 SV=4	0	49.604	13	11	116	11	904	101.8	5.52	41.4	11	0	0.11117	0.00836085	-0.10432	0.428585	0.0784455	0.111065	0.444749	0.88655	0.413507
P13489	RNH1	0.954622	0.0737342	0.843851	0.927825	-0.0669981			-0.210109		PRI RNH	Ribonuclease inhibitor OS=Homo sapiens OX=9606 GN=RNH1 PE=1 SV=2	0	49.516	39	11	149	11	461	49.9	4.82	53.72	11	0	0.839706	1.76898	1.0709	0.474522	0.757102	1.0342	0.986046	1.45614	1.4384
P11274	BCR	0.457258	2.37457	0.00422118	0.0902056	-1.12892			-5.86439	+	BCR1 D22S11	Breakpoint cluster region protein OS=Homo sapiens OX=9606 GN=BCR PE=1 SV=2	0	49.486	11	14	169	14	1271	142.7	7.03	58.76	14	0	0.613628	0.074878	0.530856	0.621229	0.392209	0.17233	1.51519	1.70886	1.38207
Q9BSJ8	ESYT1	1.27341	0.616273	0.241951	0.444492	0.348692			1.3721		FAM62A KIAA0747 MBC2	Extended synaptotagmin-1 OS=Homo sapiens OX=9606 GN=ESYT1 PE=1 SV=1	0	49.474	15	13	168	13	1104	122.8	5.83	49.53	13	0	0.181345	0.703605	0.775773	0.720035	0.806865	1.2336	0.379284	-0.138673	0.374036
Q14839	CHD4	1.01084	0.154561	0.70055	0.86195	0.0155536			0.41335			Chromodomain-helicase-DNA-binding protein 4 OS=Homo sapiens OX=9606 GN=CHD4 PE=1 SV=2	0	49.367	9	13	130	9	1912	217.9	5.86	49.93	13	0	1.16715	1.16148	1.24896	0.452853	0.432221	0.293401	1.21928	1.17839	1.13326
Q9BQ39	DDX50	1.21764	0.428926	0.372455	0.603794	0.284086			1.00337			ATP-dependent RNA helicase DDX50 OS=Homo sapiens OX=9606 GN=DDX50 PE=1 SV=1	0	49.292	19	11	183	9	737	82.5	9.17	81.91	11	0	1.19235	0.757695	0.745982	1.0282	1.17064	0.935059	0.911207	0.134939	0.797618
P62805	H4C1; H4C2; H4C3; H4C4; H4C5; H4C6; H4C8; H4C9; H4C11; H4C12; H4C13; H4C14; H4C15; H4C16	0.943428	0.321773	0.47668	0.699454	-0.0840163			-0.784351		H4/A H4FA HIST1H4A; H4/I H4FI HIST1H4B; H4/G H4FG HIST1H4C; H4/B H4FB HIST1H4D; H4/J H4FJ HIST1H4E; H4/C H4FC HIST1H4F; H4/H H4FH HIST1H4H; H4/M H4FM HIST1H4I; H4/E H4FE HIST1H4J; H4/D H4FD HIST1H4K; H4/K H4FK HIST1H4L; H4/N H4F2 H4FN HIST2H4 HIST2H4A; H4/O H4FO HIST2H4B; H4-16 HIST4H4	Histone H4 OS=Homo sapiens OX=9606 GN=H4C1 PE=1 SV=2	0	49.254	52	9	519	9	103	11.4	11.36	266.7	9	0	5.43512	5.4753	5.59696	4.94218	4.82973	4.96278	5.75924	5.42985	5.57034
P62269	RPS18	1.06375	0.188042	0.648572	0.836292	0.089156			0.491886		D6S218E	Small ribosomal subunit protein uS13 OS=Homo sapiens OX=9606 GN=RPS18 PE=1 SV=3	0	49.25	45	10	406	10	152	17.7	10.99	227.77	10	0	5.31216	5.0863	5.09675	4.74292	4.62526	4.8179	5.3644	4.79066	5.07268
P32969	RPL9; RPL9P7; RPL9P8; RPL9P9	1.23252	0.4503	0.354568	0.593103	0.301616			1.04609		; ; ;	Large ribosomal subunit protein uL6 OS=Homo sapiens OX=9606 GN=RPL9 PE=1 SV=1	0	49.211	41	8	414	8	192	21.9	9.95	186.31	8	0	6.00321	5.68999	5.76972	5.62764	5.62641	5.60201	5.74418	4.97684	5.83706
P82094	TMF1	1.2419	0.907796	0.123653	0.273239	0.312554			1.94509		ARA160	TATA element modulatory factor OS=Homo sapiens OX=9606 GN=TMF1 PE=1 SV=2	0	49.119	13	12	109	12	1093	122.8	4.92	29.73	12	0	0.311838	0.551433	0.462994	0.793228	0.977189	0.799152	0.377428	-0.123623	0.134797
Q9UH99	SUN2	1.69014	0.931356	0.117124	0.265238	0.757143			1.99244		FRIGG KIAA0668 RAB5IP UNC84B	SUN domain-containing protein 2 OS=Homo sapiens OX=9606 GN=SUN2 PE=1 SV=3	0	49.118	25	10	110	10	717	80.3	6.73	30.19	10	0	1.38328	1.05124	0.929219	-0.0965999	-0.426908	0.0236016	0.775461	-0.342665	0.659507
Q9ULW0	TPX2	0.448131	2.271	0.00535795	0.0913178	-1.15801			-5.4915	+	C20orf1 C20orf2 DIL2 HCA519	Targeting protein for Xklp2 OS=Homo sapiens OX=9606 GN=TPX2 PE=1 SV=2	0	49.115	22	13	109	13	747	85.6	9.23	39.65	13	0	0.249908	0.95609	0.465668	-4.79425	-2.901	-3.17869	1.7721	1.69088	1.68271
P10586	PTPRF	0.856109	0.393867	0.403769	0.635384	-0.224133			-0.932713		LAR	Receptor-type tyrosine-protein phosphatase F OS=Homo sapiens OX=9606 GN=PTPRF PE=1 SV=2	0	49.037	10	14	108	12	1907	212.7	6.3	31.54	14	1	0.213629	0.13933	-0.13572	-0.294132	0.19876	-1.19455	0.675071	-0.0713362	0.285903
A0FGR8	ESYT2	1.14722	0.67824	0.209778	0.405765	0.198145			1.4928		FAM62B KIAA1228	Extended synaptotagmin-2 OS=Homo sapiens OX=9606 GN=ESYT2 PE=1 SV=1	0	49.01	18	13	186	13	921	102.3	9.26	70.31	13	0	0.944456	1.09773	1.15111	0.830349	1.18154	0.449035	0.939214	0.636538	1.0231
Q92598	HSPH1	1.35537	1.49451	0.0320253	0.121392	0.438689			3.22836		HSP105 HSP110 KIAA0201	Heat shock protein 105 kDa OS=Homo sapiens OX=9606 GN=HSPH1 PE=1 SV=1	0	48.979	20	14	134	12	858	96.8	5.39	59.84	14	2	3.61326	3.63639	3.71214	3.8321	3.87477	3.59384	3.46813	3.01983	3.15777
Q96PC5	MIA2	1.39303	0.343905	0.452997	0.67769	0.478223			0.830409		CTAGE5 MEA11 MEA6 MGEA11 MGEA6	Melanoma inhibitory activity protein 2 OS=Homo sapiens OX=9606 GN=MIA2 PE=1 SV=4	0	48.898	11	14	109	14	1412	159.7	4.69	43.2	14	0	1.09342	0.430132	0.50097	-1.50563	-1.82664	-0.999906	0.939141	-0.844552	0.495266
O00461	GOLIM4	0.668456	1.70706	0.019631	0.106817	-0.581096			-3.76844		GIMPC GOLPH4 GPP130	Golgi integral membrane protein 4 OS=Homo sapiens OX=9606 GN=GOLIM4 PE=1 SV=1	0	48.882	18	10	160	10	696	81.8	4.77	50.02	10	0	0.26413	0.328917	0.27974	1.05829	1.36552	1.31545	1.1285	0.888206	0.59937
Q9BTU6	PI4K2A	1.33224	0.724593	0.188542	0.376549	0.413859			1.58321			Phosphatidylinositol 4-kinase type 2-alpha OS=Homo sapiens OX=9606 GN=PI4K2A PE=1 SV=1	0	48.859	27	12	186	12	479	54	8.29	73.21	12	0	1.00227	1.09152	1.19377	0.959044	1.51847	1.29185	0.944603	0.171099	0.93029
Q14157	UBAP2L	0.531659	1.91917	0.0120457	0.102897	-0.911427			-4.36174	+	KIAA0144 NICE4	Ubiquitin-associated protein 2-like OS=Homo sapiens OX=9606 GN=UBAP2L PE=1 SV=2	0	48.832	8	7	150	7	1087	114.5	7.11	74.22	7	0	2.72827	2.56827	3.12518	-0.144847	-0.20285	-0.403775	3.67573	3.95784	3.52243
Q5K651	SAMD9	0.717221	0.321442	0.477044	0.699177	-0.479511			-0.783658		C7orf5 DRIF1 KIAA2004 OEF1	Sterile alpha motif domain-containing protein 9 OS=Homo sapiens OX=9606 GN=SAMD9 PE=1 SV=1	0	48.812	12	15	82	15	1589	184.2	7.83	27.72	15	0	-3.15211	-4.94208	-3.54993	-3.24301	-1.74236	-2.48951	-3.09085	-3.96638	-3.14836
Q13347	EIF3I	1.93321	1.93674	0.0115682	0.103052	0.951001			4.41361	+	EIF3S2 TRIP1	Eukaryotic translation initiation factor 3 subunit I OS=Homo sapiens OX=9606 GN=EIF3I PE=1 SV=1	0	48.728	36	9	174	9	325	36.5	5.64	70.11	9	0	2.2275	2.05248	2.4831	2.78916	2.68752	2.52262	1.29245	1.61261	1.00501
Q13085	ACACA	0.671872	1.51966	0.0302232	0.117278	-0.573743			-3.28973		ACAC ACC1 ACCA	Acetyl-CoA carboxylase 1 OS=Homo sapiens OX=9606 GN=ACACA PE=1 SV=2	0	48.689	6	14	107	14	2346	265.4	6.37	39.42	14	0	-0.675617	-0.564094	-1.05953	-0.970629	-0.448561	-0.767693	-0.360306	-0.0576091	-0.160103
Q7L2J0	MEPCE	1.17361	0.914687	0.121706	0.267844	0.230959			1.95891		BCDIN3	7SK snRNA methylphosphate capping enzyme OS=Homo sapiens OX=9606 GN=MEPCE PE=1 SV=1	0	48.647	23	11	170	11	689	74.3	9.57	54.83	11	0	1.55784	1.43889	1.19937	1.57737	0.631252	1.32244	1.26829	1.14544	1.0895
P31946	YWHAB	0.939812	0.262789	0.546024	0.754123	-0.0895563			-0.658788			14-3-3 protein beta/alpha OS=Homo sapiens OX=9606 GN=YWHAB PE=1 SV=3	0	48.621	52	11	173	7	246	28.1	4.83	94.18	11	0	1.63786	1.81194	1.54559	1.68325	2.08447	1.83115	1.87711	1.53252	1.85442
Q01780	EXOSC10	1.2443	0.378828	0.417996	0.649911	0.315329			0.902137		PMSCL PMSCL2 RRP6	Exosome complex component 10 OS=Homo sapiens OX=9606 GN=EXOSC10 PE=1 SV=2	0	48.589	20	12	119	12	885	100.8	8.46	39.21	12	0	1.4884	1.75828	1.78506	1.57804	1.51429	1.3144	1.92362	0.760183	1.40194
O95218	ZRANB2	0.890358	0.597691	0.252528	0.460833	-0.167542			-1.33588		ZIS ZNF265	Zinc finger Ran-binding domain-containing protein 2 OS=Homo sapiens OX=9606 GN=ZRANB2 PE=1 SV=2	0	48.577	29	10	62	10	330	37.4	10.01	24.32	10	0	1.1313	0.965196	1.33186	0.491889	0.396439	0.555388	1.23626	1.44413	1.25058
P22090	RPS4Y1	1.13208	0.35856	0.437965	0.665031	0.178981			0.860641		RPS4Y	Small ribosomal subunit protein eS4, Y isoform 1 OS=Homo sapiens OX=9606 GN=RPS4Y1 PE=1 SV=2	0	48.563	22	7	342	7	263	29.4	10.24	156.7	7	0	5.0153	4.84838	4.84208	4.7099	4.42408	4.6603	5.06513	4.37219	4.73149
P52907	CAPZA1	0.991337	0.0509266	0.889351	0.948624	-0.0125526			-0.148206			F-actin-capping protein subunit alpha-1 OS=Homo sapiens OX=9606 GN=CAPZA1 PE=1 SV=3	0	48.479	44	9	181	7	286	32.9	5.69	70.04	9	2	2.75746	2.98022	2.90106	1.99485	1.96068	2.0734	2.94551	2.784	2.94688
Q14203	DCTN1	1.5355	1.02144	0.0951832	0.228177	0.618713			2.17587			Dynactin subunit 1 OS=Homo sapiens OX=9606 GN=DCTN1 PE=1 SV=3	0	48.386	16	13	102	13	1278	141.6	5.81	32.47	13	0	-1.21426	-0.369728	-0.676275	-0.0922716	-0.979934	-0.960958	-1.10434	-1.58357	-1.42849
P38159	RBMX	0.748467	0.830951	0.147587	0.314174	-0.417989			-1.79211		HNRPG RBMXP1	RNA-binding motif protein, X chromosome OS=Homo sapiens OX=9606 GN=RBMX PE=1 SV=3	0	48.324	29	12	190	3	391	42.3	10.05	98.03	12	7	1.4182	1.22761	1.7703	2.21276	2.03838	1.93862	2.17495	1.91039	1.58474
P78371	CCT2	1.11509	0.593445	0.255009	0.465474	0.157158			1.3276		99D8.1 CCTB	T-complex protein 1 subunit beta OS=Homo sapiens OX=9606 GN=CCT2 PE=1 SV=4	0	48.308	29	12	148	12	535	57.5	6.46	55.24	12	0	2.08881	2.23716	1.95978	2.08605	2.10562	2.04918	2.1109	1.8323	1.87108
Q5JTV8	TOR1AIP1	0.652411	0.888689	0.129214	0.283437	-0.616147			-1.90685		LAP1	Torsin-1A-interacting protein 1 OS=Homo sapiens OX=9606 GN=TOR1AIP1 PE=1 SV=2	0	48.281	28	10	106	10	583	66.2	8.18	34.47	10	0	-1.40636	-0.305168	-0.780909	0.174464	-0.504376	-0.763662	-0.126389	-0.307378	-0.210224
P83731	RPL24	1.10571	0.493638	0.320894	0.556913	0.144979			1.13201			Large ribosomal subunit protein eL24 OS=Homo sapiens OX=9606 GN=RPL24 PE=1 SV=1	0	48.177	39	9	527	9	157	17.8	11.25	270.52	9	0	4.47421	4.37596	4.31922	3.84867	3.9265	3.85465	4.38453	4.00638	4.34354
Q9Y613	FHOD1	1.2693	0.362709	0.433801	0.660954	0.344029			0.869165		FHOS FHOS1	FH1/FH2 domain-containing protein 1 OS=Homo sapiens OX=9606 GN=FHOD1 PE=1 SV=3	0	48.172	17	14	118	14	1164	126.5	6.39	35.77	14	0	0.0826149	0.378773	-0.369841	-0.847393	0.0811955	-1.35566	-0.217716	-0.92797	0.205145
Q86V81	ALYREF	1.46629	1.59841	0.0252111	0.114576	0.552169			3.48613		ALY BEF THOC4	THO complex subunit 4 OS=Homo sapiens OX=9606 GN=ALYREF PE=1 SV=3	0	48.131	44	7	286	7	257	26.9	11.15	117.93	7	0	2.7697	2.72462	2.55549	3.1003	3.23231	2.49609	2.35735	1.86268	2.17326
P34932	HSPA4	1.23882	0.404767	0.393762	0.625204	0.308963			0.954769		APG2	Heat shock 70 kDa protein 4 OS=Homo sapiens OX=9606 GN=HSPA4 PE=1 SV=4	0	48.054	17	11	175	10	840	94.3	5.19	64.66	11	0	0.43074	1.4034	0.650464	0.713921	0.933433	0.238124	0.474117	0.312858	0.770741
P07099	EPHX1	1.45846	0.79466	0.16045	0.334671	0.54445			1.72053		EPHX EPOX	Epoxide hydrolase 1 OS=Homo sapiens OX=9606 GN=EPHX1 PE=1 SV=1	0	47.958	29	10	178	10	455	52.9	7.25	77.32	10	0	1.5601	2.53926	2.18363	1.80586	1.9228	2.25947	1.3091	1.56418	1.77637
Q8NI35	PATJ	0.490448	1.0078	0.0982207	0.2323	-1.02783			-2.14783		CIPP INADL	InaD-like protein OS=Homo sapiens OX=9606 GN=PATJ PE=1 SV=3	0	47.937	10	14	112	14	1801	196.2	4.94	35.24	14	0	-1.68428	-1.86951	-0.691377	-2.532	-1.7656	-1.26014	-0.503795	0.195904	-0.853785
Q14161	GIT2	0.767131	0.854018	0.139953	0.299708	-0.382455			-1.83781		KIAA0148	ARF GTPase-activating protein GIT2 OS=Homo sapiens OX=9606 GN=GIT2 PE=1 SV=2	0	47.862	21	13	126	10	759	84.5	7.23	41.95	13	2	0.916571	0.502443	0.844079	1.1371	1.28327	1.0064	1.06483	1.45052	0.895102
O15355	PPM1G	0.523153	2.4186	0.0038142	0.08756	-0.934694			-6.02913	+	PPM1C	Protein phosphatase 1G OS=Homo sapiens OX=9606 GN=PPM1G PE=1 SV=1	0	47.796	26	10	187	10	546	59.2	4.36	81.6	10	0	0.77223	0.712886	1.13405	0.810723	1.02485	0.740358	1.77442	1.96334	1.68549
Q8WUA2	PPIL4	0.583022	2.1341	0.0073435	0.0891905	-0.778378			-5.02806	+		Peptidyl-prolyl cis-trans isomerase-like 4 OS=Homo sapiens OX=9606 GN=PPIL4 PE=1 SV=1	0	47.578	24	11	198	11	492	57.2	5.92	86.77	11	0	2.14695	2.10736	2.24766	1.16234	1.0015	1.39233	2.87655	3.23143	2.72912
P49757	NUMB	1.54267	1.37496	0.0421732	0.145292	0.625425			2.94513		C14orf41	Protein numb homolog OS=Homo sapiens OX=9606 GN=NUMB PE=1 SV=2	0	47.483	20	11	175	10	651	70.8	8.51	66.75	11	1	1.36983	1.44296	1.29794	0.298852	-0.0675247	0.406747	1.07842	0.362232	0.793793
P42356	PI4KA	1.53793	0.980341	0.104631	0.24361	0.620985			2.09169		PIK4 PIK4CA	Phosphatidylinositol 4-kinase alpha OS=Homo sapiens OX=9606 GN=PI4KA PE=1 SV=4	0	47.459	9	14	79	14	2102	236.7	7.06	20.42	14	0	-1.59628	-1.76472	-1.50938	-1.36847	-1.42101	-1.08111	-1.68927	-2.39397	-2.65008
P46782	RPS5	0.775658	1.71102	0.0194526	0.107343	-0.366508			-3.779			Small ribosomal subunit protein uS7 OS=Homo sapiens OX=9606 GN=RPS5 PE=1 SV=4	0	47.28	53	9	228	9	204	22.9	9.72	114.84	9	0	3.72091	3.64293	3.7133	3.47615	3.5689	3.35845	4.13397	3.87254	4.17014
Q07955	SRSF1	1.27751	1.23975	0.057577	0.169346	0.353331			2.64006		ASF SF2 SF2P33 SFRS1	Serine/arginine-rich splicing factor 1 OS=Homo sapiens OX=9606 GN=SRSF1 PE=1 SV=2	0	47.277	38	10	449	9	248	27.7	10.36	223.35	10	1	4.94319	4.84341	4.95566	4.97787	4.80886	4.91064	4.79303	4.34723	4.542
O75691	UTP20	1.17031	0.215987	0.608153	0.808391	0.226891			0.555503		DRIM	Small subunit processome component 20 homolog OS=Homo sapiens OX=9606 GN=UTP20 PE=1 SV=3	0	47.275	6	13	93	13	2785	318.2	7.39	25.62	13	0	1.2606	0.586278	1.14408	1.0013	1.19289	1.12573	1.22816	0.0793248	1.0028
Q9UN37	VPS4A	1.09871	0.734758	0.18418	0.371414	0.135812			1.60308		VPS4	Vacuolar protein sorting-associated protein 4A OS=Homo sapiens OX=9606 GN=VPS4A PE=1 SV=1	0	47.253	26	10	216	6	437	48.9	7.8	82.11	10	3	2.22393	2.16565	2.00359	2.7842	2.60026	2.67911	2.0675	2.02682	1.89143
Q9Y230	RUVBL2	1.1758	0.809727	0.154979	0.32576	0.233645			1.75021		INO80J TIP48 TIP49B	RuvB-like 2 OS=Homo sapiens OX=9606 GN=RUVBL2 PE=1 SV=3	0	47.217	27	11	286	11	463	51.1	5.64	145.38	11	0	3.16927	3.02032	3.38356	3.15591	3.09335	3.04844	3.11075	2.9306	2.83087
P50993	ATP1A2	1.27837	0.480199	0.33098	0.566952	0.354301			1.10545		KIAA0778	Sodium/potassium-transporting ATPase subunit alpha-2 OS=Homo sapiens OX=9606 GN=ATP1A2 PE=1 SV=1	0	47.14	14	11	297	2	1020	112.2	5.66	140.37	11	0	1.31006	1.77893	1.71005	2.12359	1.76026	1.32764	1.78428	0.813866	1.13799
O75955	FLOT1	1.42138	0.693058	0.202741	0.395002	0.507293			1.52168			Flotillin-1 OS=Homo sapiens OX=9606 GN=FLOT1 PE=1 SV=3	0	47.055	26	9	120	9	427	47.3	7.49	39.06	9	0	1.06971	1.22557	1.36151	2.04252	1.84703	2.25301	0.839464	0.100142	1.1953
P29401	TKT	1.36123	0.906791	0.123939	0.273473	0.444912			1.94307			Transketolase OS=Homo sapiens OX=9606 GN=TKT PE=1 SV=3	0	47.025	25	11	79	11	623	67.8	7.66	22.4	11	0	2.07442	2.4542	1.76877	2.35122	1.84711	1.8346	1.65671	1.45454	1.85139
P22695	UQCRC2	0.903964	0.467015	0.341181	0.577314	-0.145663			-1.07932			Cytochrome b-c1 complex subunit 2, mitochondrial OS=Homo sapiens OX=9606 GN=UQCRC2 PE=1 SV=3	0	47.025	31	11	191	11	453	48.4	8.63	86.83	11	0	1.65711	1.69714	1.48754	1.55615	1.5078	1.35404	1.63136	1.65072	1.9967
P61313	RPL15	1.14282	0.327601	0.470326	0.692488	0.192602			0.79653		EC45	Large ribosomal subunit protein eL15 OS=Homo sapiens OX=9606 GN=RPL15 PE=1 SV=2	0	47.017	48	11	639	11	204	24.1	11.62	353.3	11	0	6.49706	6.32741	6.33663	6.08748	6.04389	6.17659	6.55415	5.75141	6.27773
Q9ULG6	CCPG1	0.844126	0.441822	0.361558	0.600411	-0.244469			-1.02917		CCP8 CPR8 KIAA1254	Cell cycle progression protein 1 OS=Homo sapiens OX=9606 GN=CCPG1 PE=1 SV=3	0	46.948	15	12	119	12	757	87.3	5.95	53.67	12	0	6.87244	6.49594	6.76996	7.14792	6.90654	7.05188	7.2082	6.54168	7.12186
P07355	ANXA2	1.48934	1.12818	0.0744432	0.194667	0.574673			2.39892		ANX2 ANX2L4 CAL1H LPC2D	Annexin A2 OS=Homo sapiens OX=9606 GN=ANXA2 PE=1 SV=2	0	46.825	29	9	133	9	339	38.6	7.75	54.88	9	0	2.14899	2.64534	2.46439	1.9458	2.22029	1.40346	1.54758	2.20035	1.78676
P31939	ATIC	1.19262	0.500204	0.316079	0.549908	0.254132			1.14496		PURH	Bifunctional purine biosynthesis protein ATIC OS=Homo sapiens OX=9606 GN=ATIC PE=1 SV=3	0	46.812	27	11	188	11	592	64.6	6.71	64.79	11	0	1.12039	1.543	1.16129	1.39669	0.856819	1.61342	1.14089	0.673222	1.24817
P12235	SLC25A4	0.824831	1.78508	0.0164029	0.103421	-0.277829			-3.97987		AAC1 ANT1	ADP/ATP translocase 1 OS=Homo sapiens OX=9606 GN=SLC25A4 PE=1 SV=4	0	46.779	44	11	355	3	298	33	9.76	176.59	11	0	-0.0213289	-0.160147	-0.100797	-0.943667	-0.139156	-0.187155	0.282475	0.0848044	0.183937
Q9Y6M7	SLC4A7	1.92047	1.38129	0.0415629	0.143933	0.94146			2.95979		BT NBC2 NBC2B NBC3 NBCn1 SBC2 SLC4A6	Sodium bicarbonate cotransporter 3 OS=Homo sapiens OX=9606 GN=SLC4A7 PE=1 SV=2	0	46.736	15	13	120	13	1214	136	6.71	40.41	13	0	0.577768	0.291349	0.0783532	0.202575	0.578968	0.421542	-0.244516	-1.17922	-0.453171
Q7RTP6	MICAL3	2.88886	0.492886	0.321451	0.557449	1.5305			1.13052		KIAA0819 KIAA1364	[F-actin]-monooxygenase MICAL3 OS=Homo sapiens OX=9606 GN=MICAL3 PE=1 SV=2	0	46.645	7	13	128	13	2002	224.2	5.55	40.83	13	0	4.00986	0.0233719	0.166135	-0.0720115	0.148704	-0.655281	-0.827964	0.0790383	0.356786
Q06210	GFPT1	0.870243	0.675253	0.211226	0.406294	-0.200511			-1.48698		GFAT GFPT	Glutamine--fructose-6-phosphate aminotransferase [isomerizing] 1 OS=Homo sapiens OX=9606 GN=GFPT1 PE=1 SV=3	0	46.641	19	11	173	8	699	78.8	7.11	67.06	11	3	1.5878	1.49608	1.39518	1.81185	1.82014	1.71202	1.93751	1.54661	1.59647
P55011	SLC12A2	1.07961	0.173764	0.670249	0.845744	0.11051			0.458726		NKCC1	Solute carrier family 12 member 2 OS=Homo sapiens OX=9606 GN=SLC12A2 PE=1 SV=1	0	46.516	12	12	168	12	1212	131.4	6.4	70.09	12	0	1.2298	1.27016	0.827098	1.5094	1.4248	1.23205	1.32947	0.654314	1.01174
O60762	DPM1	1.32854	1.74829	0.0178528	0.107046	0.409841			3.87924			Dolichol-phosphate mannosyltransferase subunit 1 OS=Homo sapiens OX=9606 GN=DPM1 PE=1 SV=1	0	46.471	45	12	210	12	260	29.6	9.57	105.65	12	0	4.22818	4.08157	3.92347	3.78521	3.88801	3.86564	3.75998	3.55938	3.68434
Q8TDD1	DDX54	1.17732	0.326272	0.471768	0.69452	0.235503			0.793755			ATP-dependent RNA helicase DDX54 OS=Homo sapiens OX=9606 GN=DDX54 PE=1 SV=2	0	46.467	19	13	122	13	881	98.5	10.02	47.94	13	0	-0.427857	-0.0094625	-1.00428	-0.36888	-0.209733	-0.372963	-0.598375	-0.710045	-0.839689
P61224	RAP1B	1.00872	0.0245778	0.944979	0.974824	0.0125244			0.0734437			Ras-related protein Rap-1b OS=Homo sapiens OX=9606 GN=RAP1B PE=1 SV=1	0	46.462	57	10	279	1	184	20.8	5.78	139.56	10	6	2.91332	2.82383	2.78819	3.18852	3.19101	3.51368	2.98685	2.49657	3.00435
Q53GQ0	HSD17B12	1.02414	0.106158	0.783144	0.894687	0.0344072			0.294335		SDR12C1	Very-long-chain 3-oxoacyl-CoA reductase OS=Homo sapiens OX=9606 GN=HSD17B12 PE=1 SV=2	0	46.453	26	10	184	10	312	34.3	9.32	77.55	10	0	2.26356	2.04855	2.07265	2.24869	2.31594	2.60753	2.25865	1.92929	2.09361
Q9HAN9	NMNAT1	5.80069	2.9073	0.00123793	0.079122	2.53622			8.14235	+	NMNAT	Nicotinamide/nicotinic acid mononucleotide adenylyltransferase 1 OS=Homo sapiens OX=9606 GN=NMNAT1 PE=1 SV=1	0	46.387	40	11	147	11	279	31.9	8.87	62.38	11	0	2.67929	2.03963	3.10181	1.72659	2.12117	2.59165	0.124696	-0.0101213	0.0974821
Q9H0U9	TSPYL1	0.873696	0.27018	0.53681	0.74542	-0.194796			-0.674777		TSPYL	Testis-specific Y-encoded-like protein 1 OS=Homo sapiens OX=9606 GN=TSPYL1 PE=1 SV=3	0	46.374	32	10	98	10	437	49.2	5.45	30.34	10	0	0.854698	1.80454	1.42556	1.78812	0.603242	1.71086	1.68155	1.3956	1.59204
P04439	HLA-A	1.00071	0.00159661	0.99633	0.998146	0.00102504			0.0048928		HLAA	HLA class I histocompatibility antigen, A alpha chain OS=Homo sapiens OX=9606 GN=HLA-A PE=1 SV=2	0	46.325	37	9	381	2	365	40.8	6	168.17	9	2	4.03786	3.9154	3.68863	4.53405	4.14168	4.46956	4.09745	3.51636	4.02501
O00629	KPNA4	1.07115	0.176474	0.666079	0.845635	0.0991555			0.465058		QIP1	Importin subunit alpha-3 OS=Homo sapiens OX=9606 GN=KPNA4 PE=1 SV=1	0	46.245	31	10	132	7	521	57.9	4.96	58.66	10	2	1.22676	1.67604	1.43806	1.33774	1.94638	1.8359	1.1131	1.25408	1.6762
O00410	IPO5	0.913951	1.05521	0.0880626	0.217139	-0.129811			-2.24571		KPNB3 RANBP5	Importin-5 OS=Homo sapiens OX=9606 GN=IPO5 PE=1 SV=4	0	46.239	16	11	123	11	1097	123.6	4.94	51.86	11	0	0.878729	1.01891	0.939943	0.462226	1.02782	1.06403	1.10911	0.993791	1.12411
P62191	PSMC1	0.932831	0.163177	0.686789	0.852463	-0.100313			-0.433825			26S proteasome regulatory subunit 4 OS=Homo sapiens OX=9606 GN=PSMC1 PE=1 SV=1	0	46.234	29	11	279	11	440	49.2	6.21	108.57	11	0	2.40492	2.54418	2.45372	2.5921	2.583	2.47219	2.71502	2.1213	2.86744
Q9H307	PNN	1.19865	1.26215	0.0546829	0.167458	0.261412			2.68956		DRS MEMA	Pinin OS=Homo sapiens OX=9606 GN=PNN PE=1 SV=5	0	46.233	20	13	132	13	717	81.6	7.14	38.16	13	0	1.14852	1.09231	1.26052	1.60211	1.56918	1.21969	1.07204	0.806498	0.838581
Q9Y5Q8	GTF3C5	0.759051	1.02017	0.0954618	0.227866	-0.397731			-2.17326			General transcription factor 3C polypeptide 5 OS=Homo sapiens OX=9606 GN=GTF3C5 PE=1 SV=2	0	46.146	23	11	177	11	519	59.5	6.9	73.56	11	0	1.26925	1.2034	1.40765	0.938708	1.04766	0.851314	1.41306	2.00799	1.65243
Q9H7N4	SCAF1	0.810469	0.37544	0.42127	0.65509	-0.303171			-0.895224		SFRS19 SRA1	Splicing factor, arginine/serine-rich 19 OS=Homo sapiens OX=9606 GN=SCAF1 PE=1 SV=3	0	46.054	13	10	78	10	1312	139.2	9.25	24.97	10	0	-0.436287	-1.46582	-0.916045	-0.00400393	-0.890593	0.068432	-0.471091	-0.477497	-0.960054
Q13123	IK	0.733676	3.22983	0.000589079	0.0824348	-0.446786			-9.87916	+	RED RER	Protein Red OS=Homo sapiens OX=9606 GN=IK PE=1 SV=3	0	46.009	21	11	180	11	557	65.6	6.64	84.81	11	0	1.41799	1.44264	1.33709	0.782714	1.00454	0.710018	1.78731	1.89777	1.85299
P06748	NPM1	1.06311	0.180856	0.659393	0.843607	0.0882942			0.475256		NPM	Nucleophosmin OS=Homo sapiens OX=9606 GN=NPM1 PE=1 SV=2	0	45.949	27	8	260	8	294	32.6	4.78	131.29	8	0	5.44656	5.2579	5.50284	4.79473	4.73665	4.91462	5.49023	4.97345	5.47874
P62834	RAP1A	1.17344	0.426703	0.374366	0.605336	0.230747			0.998917		KREV1	Ras-related protein Rap-1A OS=Homo sapiens OX=9606 GN=RAP1A PE=1 SV=1	0	45.947	57	10	280	1	184	21	6.67	134.79	10	0	-2.00498	-1.61604	-2.30279	-4.33078	-1.72402	-1.45046	-2.2966	-2.34744	-1.97202
P50990	CCT8	1.2288	1.22354	0.0597664	0.171459	0.297248			2.60447		C21orf112 CCTQ KIAA0002	T-complex protein 1 subunit theta OS=Homo sapiens OX=9606 GN=CCT8 PE=1 SV=4	0	45.936	24	11	228	11	548	59.6	5.6	96.68	11	0	1.93403	2.08028	2.07987	1.76962	2.23993	2.06653	1.54883	1.74798	1.90562
Q7L0Y3	TRMT10C	0.99052	0.0240079	0.94622	0.974901	-0.0137424			-0.0717837		MRPP1 RG9MTD1	tRNA methyltransferase 10 homolog C OS=Homo sapiens OX=9606 GN=TRMT10C PE=1 SV=2	0	45.868	32	10	117	10	403	47.3	9.36	55.65	10	0	1.34767	1.27118	0.80703	1.23022	1.63284	1.42108	1.02002	1.32624	1.12085
Q5QJE6	DNTTIP2	1.17252	1.14699	0.0712875	0.189891	0.229608			2.43897		ERBP TDIF2	Deoxynucleotidyltransferase terminal-interacting protein 2 OS=Homo sapiens OX=9606 GN=DNTTIP2 PE=1 SV=2	0	45.789	21	11	114	11	756	84.4	6.16	40.18	11	0	0.957924	0.743985	0.992734	-0.52627	-0.483051	-1.76575	0.760926	0.667754	0.577141
Q8TEQ6	GEMIN5	2.95436	1.96287	0.0108925	0.107033	1.56284			4.49159	+		Gem-associated protein 5 OS=Homo sapiens OX=9606 GN=GEMIN5 PE=1 SV=3	0	45.743	12	13	70	13	1508	168.5	6.62	24.94	13	0	-0.779374	-1.03074	-0.958495	-1.74389	-1.70675	-3.59435	-2.73973	-2.90466	-1.81275
Q96SB4	SRPK1	1.20144	0.843635	0.143339	0.306938	0.264759			1.81722			SRSF protein kinase 1 OS=Homo sapiens OX=9606 GN=SRPK1 PE=1 SV=2	0	45.616	22	11	116	10	655	74.3	6.16	49.34	11	0	1.08831	1.04876	1.5038	0.786306	0.694391	0.790825	0.946223	0.938676	0.961688
P09429	HMGB1	1.4867	1.96029	0.0109575	0.107093	0.572116			4.48384		HMG1	High mobility group protein B1 OS=Homo sapiens OX=9606 GN=HMGB1 PE=1 SV=3	0	45.611	35	8	260	6	215	24.9	5.74	108.19	8	1	2.72369	2.48291	2.89403	3.0692	2.80801	2.50388	2.03865	2.1597	2.18593
O43290	SART1	0.948905	0.22554	0.594921	0.801588	-0.0756638			-0.576896			U4/U6.U5 tri-snRNP-associated protein 1 OS=Homo sapiens OX=9606 GN=SART1 PE=1 SV=1	0	45.38	18	12	131	12	800	90.2	6.13	47.84	12	0	-0.00222472	-0.0619592	0.277533	-1.10021	-0.24349	-0.343776	0.0406641	0.301391	0.0982851
P21359	NF1	0.469106	0.603963	0.248907	0.455364	-1.09201			-1.34811			Neurofibromin OS=Homo sapiens OX=9606 GN=NF1 PE=1 SV=2	0	45.347	7	15	82	15	2839	319.2	7.39	20.39	15	0	-2.43697	-0.918403	-2.28425	-2.8053	-2.96062	-2.5599	-0.407666	0.0994961	-2.05541
P62266	RPS23	1.09068	0.21174	0.614129	0.813382	0.125234			0.545937			Small ribosomal subunit protein uS12 OS=Homo sapiens OX=9606 GN=RPS23 PE=1 SV=3	0	45.306	50	6	437	6	143	15.8	10.49	183.67	6	0	5.88046	5.82911	5.71572	5.1839	5.10362	5.16699	5.96904	5.24115	5.8394
Q96CW5	TUBGCP3	0.989742	0.0165107	0.962696	0.980318	-0.0148757			-0.0497639		GCP3	Gamma-tubulin complex component 3 OS=Homo sapiens OX=9606 GN=TUBGCP3 PE=1 SV=2	0	45.299	20	12	114	12	907	103.5	8.12	43.33	12	0	-0.760727	-0.278382	0.273211	-0.170978	-0.273085	-0.173029	-0.219944	-0.240687	-0.260641
P61254	RPL26	1.14336	0.270359	0.536588	0.745387	0.193279			0.675165			Large ribosomal subunit protein uL24 OS=Homo sapiens OX=9606 GN=RPL26 PE=1 SV=1	0	45.283	52	11	627	3	145	17.2	10.55	299.87	11	7	6.39385	6.18248	6.16041	6.1381	5.84183	6.03153	6.52764	5.57013	6.05914
Q7L7X3	TAOK1	1.06868	0.117494	0.762968	0.888089	0.0958261			0.322868		KIAA1361 MAP3K16 MARKK	Serine/threonine-protein kinase TAO1 OS=Homo sapiens OX=9606 GN=TAOK1 PE=1 SV=1	0	45.268	17	13	103	11	1001	116	7.65	31.25	13	0	-0.436128	-0.106345	-0.206788	-0.159002	-0.436324	-0.0148062	-0.217454	-0.882273	0.0629875
Q32P51	HNRNPA1L2	1.20994	0.791931	0.161462	0.335479	0.274931			1.71516		HNRNPA1L	Heterogeneous nuclear ribonucleoprotein A1-like 2 OS=Homo sapiens OX=9606 GN=HNRNPA1L2 PE=2 SV=2	0	45.246	33	8	198	7	320	34.2	9	90.79	8	0	2.88494	3.14772	3.11785	2.31642	2.27048	2.20737	3.02378	2.5507	2.75124
O60313	OPA1	1.33568	1.94025	0.0114749	0.103563	0.417576			4.42403		KIAA0567	Dynamin-like 120 kDa protein, mitochondrial OS=Homo sapiens OX=9606 GN=OPA1 PE=1 SV=3	0	45.205	15	13	116	13	960	111.6	7.87	41.58	13	0	0.520229	0.449721	0.337224	0.807104	0.835551	0.8295	0.022462	-0.118893	0.150875
O43865	AHCYL1	0.86178	0.0951039	0.803334	0.905781	-0.214608			-0.266074		DCAL IRBIT XPVKONA	S-adenosylhomocysteine hydrolase-like protein 1 OS=Homo sapiens OX=9606 GN=AHCYL1 PE=1 SV=2	0	45.139	26	12	104	2	530	58.9	6.89	34.02	12	4	-0.263289	-0.303786	-2.21582	0.417635	0.155297	0.254279	-0.911513	0.209114	-1.43667
P61981	YWHAG	2.42633	1.97405	0.0106157	0.106104	1.27878			4.52526	+		14-3-3 protein gamma OS=Homo sapiens OX=9606 GN=YWHAG PE=1 SV=2	0	45.129	44	9	147	7	247	28.3	4.89	74.67	9	0	1.43073	1.23968	0.619118	0.549401	2.15053	0.0453159	0.0953438	-0.362472	-0.279684
P61421	ATP6V0D1	1.22684	0.509752	0.309206	0.541564	0.294948			1.16376		ATP6D VPATPD	V-type proton ATPase subunit d 1 OS=Homo sapiens OX=9606 GN=ATP6V0D1 PE=1 SV=1	0	45.119	33	12	152	12	351	40.3	5	70.45	12	0	1.41672	1.25355	1.07482	2.80386	2.82986	2.93125	1.17267	0.486852	1.20072
Q86YQ8	CPNE8	2.34374	1.73641	0.0183482	0.106817	1.22882			3.84708	+		Copine-8 OS=Homo sapiens OX=9606 GN=CPNE8 PE=1 SV=2	0	45.093	26	11	158	11	564	63.1	5.96	55.8	11	0	1.37578	1.79319	1.36535	1.58151	1.48528	0.962979	0.403669	-0.263207	0.707411
Q9H9T3	ELP3	0.922716	0.292165	0.510311	0.726858	-0.116041			-0.721884			Elongator complex protein 3 OS=Homo sapiens OX=9606 GN=ELP3 PE=1 SV=2	0	44.963	24	12	182	12	547	62.2	8.88	87.69	12	0	1.11996	1.23974	1.0669	0.193623	0.246445	0.438885	1.45085	0.957346	1.36653
Q14254	FLOT2	1.05175	0.0823494	0.827276	0.921559	0.0727935			0.232893		ESA1 M17S1	Flotillin-2 OS=Homo sapiens OX=9606 GN=FLOT2 PE=1 SV=2	0	44.926	29	11	165	11	428	47	5.25	71.43	11	0	0.794045	1.22673	1.66425	1.89626	2.20939	2.24633	0.975502	0.963685	1.52745
Q9NX63	CHCHD3	1.13581	0.401829	0.396434	0.628673	0.183726			0.948832		MIC19 MINOS3	MICOS complex subunit MIC19 OS=Homo sapiens OX=9606 GN=CHCHD3 PE=1 SV=1	0	44.917	40	10	142	10	227	26.1	8.28	65.88	10	0	1.89624	1.78764	1.66336	2.77264	2.46784	2.71254	1.93806	1.31709	1.54092
P35268	RPL22	1.29381	0.923526	0.119254	0.267886	0.371627			1.97668			Large ribosomal subunit protein eL22 OS=Homo sapiens OX=9606 GN=RPL22 PE=1 SV=2	0	44.852	59	6	355	5	128	14.8	9.19	199.62	6	1	6.63146	6.4874	6.53378	6.13361	5.90769	6.20636	6.46747	5.83936	6.23093
Q9ULT8	HECTD1	0.986735	0.0268606	0.940025	0.97442	-0.0192661			-0.0800735		KIAA1131	E3 ubiquitin-protein ligase HECTD1 OS=Homo sapiens OX=9606 GN=HECTD1 PE=1 SV=4	0	44.847	6	14	101	14	2610	289.2	5.35	31.99	14	0	0.25631	0.302867	0.577774	-0.445583	0.288806	0.186116	0.398518	0.776919	0.0193116
Q96CW1	AP2M1	1.13022	0.437488	0.365184	0.604652	0.176605			1.02051		CLAPM1 KIAA0109	AP-2 complex subunit mu OS=Homo sapiens OX=9606 GN=AP2M1 PE=1 SV=2	0	44.837	28	11	241	11	435	49.6	9.54	144.31	11	0	2.78803	2.66788	2.87154	2.67283	2.50518	2.62274	2.88748	2.32454	2.58561
Q9UNQ2	DIMT1	1.14787	0.564641	0.272495	0.490025	0.198956			1.27137		DIMT1L	Probable dimethyladenosine transferase OS=Homo sapiens OX=9606 GN=DIMT1 PE=1 SV=1	0	44.805	43	11	184	11	313	35.2	9.99	75.55	11	0	1.59083	1.54277	1.54984	1.00911	0.236245	1.0252	1.66643	1.26813	1.15201
Q5T6F2	UBAP2	0.297824	1.83548	0.0146058	0.10421	-1.74747			-4.12056	+	KIAA1491	Ubiquitin-associated protein 2 OS=Homo sapiens OX=9606 GN=UBAP2 PE=1 SV=1	0	44.799	15	10	105	10	1119	117	7.34	39.68	10	0	-0.398953	-0.32441	0.387605	-0.984049	-1.69458	-1.2646	1.53067	2.27345	1.10253
Q9NUL7	DDX28	1.42526	1.40681	0.039191	0.137283	0.511223			3.01928		MDDX28	Probable ATP-dependent RNA helicase DDX28 OS=Homo sapiens OX=9606 GN=DDX28 PE=1 SV=2	0	44.778	25	9	188	9	540	59.5	10.42	73.34	9	0	2.60373	2.46749	2.29408	2.04829	1.93494	2.45671	1.96756	1.68405	2.18003
P10398	ARAF	1.42779	0.864099	0.136742	0.293439	0.513779			1.85784		ARAF1 PKS PKS2	Serine/threonine-protein kinase A-Raf OS=Homo sapiens OX=9606 GN=ARAF PE=1 SV=2	0	44.776	20	10	142	7	606	67.5	9.01	61.29	10	0	0.183903	-0.172782	0.501181	0.000101103	0.622902	-0.0368357	-0.180985	-0.733957	-0.114094
Q86V48	LUZP1	0.955337	0.0632195	0.864531	0.938571	-0.0659183			-0.181868			Leucine zipper protein 1 OS=Homo sapiens OX=9606 GN=LUZP1 PE=1 SV=2	0	44.731	13	12	111	12	1076	120.2	8.5	33.31	12	0	-0.639361	-0.312343	-0.277168	-0.65802	-0.24133	-0.0825748	0.338146	-0.610283	-0.75898
O60306	AQR	1.14075	0.120225	0.758185	0.888191	0.189988			0.329678		KIAA0560	RNA helicase aquarius OS=Homo sapiens OX=9606 GN=AQR PE=1 SV=4	0	44.628	9	11	93	11	1485	171.2	6.37	23.53	11	0	-2.30478	-0.81847	-0.631243	-2.15746	-0.776096	-1.03914	-0.998418	-1.75392	-1.57212
Q6Y7W6	GIGYF2	0.624559	1.84829	0.0141811	0.105114	-0.67909			-4.15687		KIAA0642 PERQ2 TNRC15	GRB10-interacting GYF protein 2 OS=Homo sapiens OX=9606 GN=GIGYF2 PE=1 SV=1	0	44.605	10	11	186	11	1299	150	5.54	77.27	11	0	1.95785	1.82329	2.12176	0.936044	0.826481	0.616052	2.64061	2.88998	2.40958
Q13247	SRSF6	1.12525	1.17635	0.0666268	0.184285	0.170243			2.50196		SFRS6 SRP55	Serine/arginine-rich splicing factor 6 OS=Homo sapiens OX=9606 GN=SRSF6 PE=1 SV=2	0	44.54	27	11	265	8	344	39.6	11.43	108.29	11	2	2.72019	2.74618	2.93285	2.39888	2.09694	2.09866	2.60772	2.64913	2.63164
P48643	CCT5	1.01789	0.0317441	0.929514	0.967824	0.0255798			0.0941548		CCTE KIAA0098	T-complex protein 1 subunit epsilon OS=Homo sapiens OX=9606 GN=CCT5 PE=1 SV=1	0	44.511	20	10	132	10	541	59.6	5.66	55.45	10	0	1.48449	1.192	1.54417	1.34624	1.2504	1.6825	1.78591	0.927753	1.43027
Q08379	GOLGA2	1.47254	1.00481	0.0988995	0.233508	0.558307			2.14169			Golgin subfamily A member 2 OS=Homo sapiens OX=9606 GN=GOLGA2 PE=1 SV=3	0	44.456	13	11	160	11	1002	113	5.02	71.67	11	0	0.627354	0.975681	0.808364	0.473996	0.26344	-0.654809	0.726441	-0.00109714	0.0111332
Q9H814	PHAX	0.788076	1.06563	0.0859737	0.213162	-0.343594			-2.26741		RNUXA	Phosphorylated adapter RNA export protein OS=Homo sapiens OX=9606 GN=PHAX PE=1 SV=1	0	44.376	28	11	125	11	394	44.4	5.4	58.98	11	0	1.60911	1.51914	1.91074	1.25844	1.42435	1.25654	1.87583	2.19953	1.99442
P33992	MCM5	0.940117	0.534335	0.29219	0.515718	-0.0890882			-1.21205		CDC46	DNA replication licensing factor MCM5 OS=Homo sapiens OX=9606 GN=MCM5 PE=1 SV=5	0	44.312	20	11	185	11	734	82.2	8.37	82.05	11	0	2.06171	2.03211	2.11999	2.54515	2.28143	2.20348	2.26579	2.18426	2.03102
P02768	ALB	0.374044	3.14368	0.000718326	0.0802667	-1.41872			-9.38453	+		Albumin OS=Homo sapiens OX=9606 GN=ALB PE=1 SV=2	0	44.102	12	9	139	9	609	69.3	6.28	71.25	9	0	4.63111	4.66469	5.04336	4.56266	4.69042	4.82721	6.16636	6.33849	6.09047
P15121	AKR1B1	0.99679	0.00910143	0.979261	0.989748	-0.00463907			-0.0276561		ALDR1 ALR2	Aldo-keto reductase family 1 member B1 OS=Homo sapiens OX=9606 GN=AKR1B1 PE=1 SV=3	0	43.986	48	11	249	11	316	35.8	6.98	105.6	11	0	4.10356	4.28373	4.00277	4.23459	4.30156	4.53604	4.38101	3.87497	4.14801
Q96EB6	SIRT1	1.03077	0.0724908	0.846271	0.928746	0.0437183			0.206795		SIR2L1	NAD-dependent protein deacetylase sirtuin-1 OS=Homo sapiens OX=9606 GN=SIRT1 PE=1 SV=2	0	43.865	18	10	100	10	747	81.6	4.67	24.26	10	0	3.47549	3.45678	3.45347	3.86526	3.87968	4.05058	3.74238	3.02133	3.49089
Q58FF8	HSP90AB2P	0.973444	0.0929508	0.807327	0.908017	-0.0388307			-0.260517		HSP90BB	Putative heat shock protein HSP 90-beta 2 OS=Homo sapiens OX=9606 GN=HSP90AB2P PE=1 SV=2	0	43.836	17	10	319	2	381	44.3	4.84	158.21	10	0	2.3182	2.55325	2.61899	2.29807	2.68252	2.82636	2.73046	2.32344	2.55304
Q9NXF1	TEX10	0.747544	0.364991	0.431528	0.658018	-0.41977			-0.873845			Testis-expressed protein 10 OS=Homo sapiens OX=9606 GN=TEX10 PE=1 SV=2	0	43.821	15	13	106	13	929	105.6	9.36	30.89	13	0	-1.0635	-1.29272	0.238831	-0.801113	-0.470964	0.0132758	-0.287895	-0.384542	-0.185644
P62277	RPS13	1.16037	0.298516	0.502903	0.718777	0.214584			0.735372			Small ribosomal subunit protein uS15 OS=Homo sapiens OX=9606 GN=RPS13 PE=1 SV=2	0	43.82	40	8	428	8	151	17.2	10.54	190.93	8	0	6.84256	6.54637	6.55412	6.98787	6.67973	7.07857	6.82654	5.90343	6.56933
P35241	RDX	0.96491	0.0555978	0.879837	0.944242	-0.0515338			-0.161082			Radixin OS=Homo sapiens OX=9606 GN=RDX PE=1 SV=1	0	43.812	15	11	225	4	583	68.5	6.37	111.68	11	0	-0.0458738	0.974364	0.362022	-0.157579	-0.0237271	0.339193	0.530925	0.660882	0.253306
P60842	EIF4A1	0.960107	0.198076	0.633759	0.826631	-0.0587329			-0.514915		DDX2A EIF4A	Eukaryotic initiation factor 4A-I OS=Homo sapiens OX=9606 GN=EIF4A1 PE=1 SV=1	0	43.728	31	10	272	4	406	46.1	5.48	150.65	10	3	2.86582	2.86554	3.03091	2.7922	2.96298	3.15131	3.05237	2.78197	3.10413
O94874	UFL1	0.961501	0.275542	0.530222	0.740591	-0.0566392			-0.686329		KIAA0776 MAXER NLBP RCAD	E3 UFM1-protein ligase 1 OS=Homo sapiens OX=9606 GN=UFL1 PE=1 SV=2	0	43.688	18	12	143	12	794	89.5	6.79	53.42	12	0	2.02497	2.05907	2.00168	1.76791	1.8674	1.74995	2.24298	1.97583	2.03683
Q13155	AIMP2	0.693112	2.52852	0.00296131	0.0898571	-0.528839			-6.45742	+	JTV1	Aminoacyl tRNA synthase complex-interacting multifunctional protein 2 OS=Homo sapiens OX=9606 GN=AIMP2 PE=1 SV=2	0	43.68	31	8	236	8	320	35.3	8.22	78.39	8	0	2.15679	1.99316	2.00759	2.0267	1.62531	1.74237	2.70679	2.52923	2.50803
P04181	OAT	0.99321	0.0174934	0.96052	0.978382	-0.0098294			-0.0526698			Ornithine aminotransferase, mitochondrial OS=Homo sapiens OX=9606 GN=OAT PE=1 SV=1	0	43.676	26	8	146	8	439	48.5	7.03	55.42	8	0	0.443464	0.567474	0.425297	0.0387073	0.751207	0.441244	0.422128	0.83032	0.213275
P19367	HK1	1.17452	0.532283	0.293573	0.5182	0.23207			1.20802			Hexokinase-1 OS=Homo sapiens OX=9606 GN=HK1 PE=1 SV=3	0	43.585	15	11	105	10	917	102.4	6.8	44.9	11	0	-0.286451	0.331331	0.209571	0.430124	0.616245	0.856358	-0.0818744	-0.159364	-0.200521
Q16531	DDB1	1.10078	0.396313	0.401501	0.634551	0.138526			0.93767		XAP1	DNA damage-binding protein 1 OS=Homo sapiens OX=9606 GN=DDB1 PE=1 SV=1	0	43.544	11	11	127	11	1140	126.9	5.26	30.94	11	0	0.149794	-0.125011	0.154032	0.293009	0.447265	0.399958	0.114792	-0.0673054	-0.28425
P00966	ASS1	1.13207	0.626302	0.236428	0.438048	0.17896			1.39163		ASS	Argininosuccinate synthase OS=Homo sapiens OX=9606 GN=ASS1 PE=1 SV=2	0	43.531	25	10	208	10	412	46.5	8.02	103.7	10	0	2.63214	2.93455	2.60837	2.63263	2.49086	2.62347	2.61192	2.39785	2.62841
O75694	NUP155	0.911612	0.148494	0.710405	0.864905	-0.133509			-0.398812		KIAA0791	Nuclear pore complex protein Nup155 OS=Homo sapiens OX=9606 GN=NUP155 PE=1 SV=1	0	43.495	11	12	117	12	1391	155.1	6.16	42.83	12	0	-0.862916	-0.213317	0.248061	0.0621938	0.18462	0.0632106	-0.29134	-0.158052	0.0217457
P29597	TYK2	1.47486	0.271768	0.53485	0.744532	0.560581			0.678202			Non-receptor tyrosine-protein kinase TYK2 OS=Homo sapiens OX=9606 GN=TYK2 PE=1 SV=3	0	43.468	12	11	116	9	1187	133.6	7.15	29.99	11	0	-1.80121	-1.83112	-1.79672	-1.98881	-1.61271	-2.01586	-1.08235	-3.91159	-2.11686
O75746	SLC25A12	0.882256	1.01593	0.0963974	0.230384	-0.180731			-2.16454		AGC1 ARALAR1	Electrogenic aspartate/glutamate antiporter SLC25A12, mitochondrial OS=Homo sapiens OX=9606 GN=SLC25A12 PE=1 SV=2	0	43.449	21	13	167	8	678	74.7	8.38	84.07	13	0	0.0983295	0.0881312	0.216893	-0.106759	-0.6983	-0.0406839	0.185931	0.322695	0.436922
Q8IVT2	MISP	0.589844	1.65004	0.0223851	0.111853	-0.761596			-3.61859		C19orf21	Mitotic interactor and substrate of PLK1 OS=Homo sapiens OX=9606 GN=MISP PE=1 SV=1	0	43.434	18	9	104	9	679	75.3	6.83	30.75	9	0	-0.581486	-0.554896	-0.789032	-1.34495	-2.12644	-2.80536	-0.0100038	0.506901	-0.137524
Q8WXX5	DNAJC9	1.38263	0.987687	0.102876	0.241135	0.467414			2.10667			DnaJ homolog subfamily C member 9 OS=Homo sapiens OX=9606 GN=DNAJC9 PE=1 SV=1	0	43.423	37	9	146	9	260	29.9	5.73	70.11	9	0	2.28329	2.0278	1.96975	-0.504252	0.419713	-0.0625607	1.84183	1.22686	1.8099
Q08AF3	SLFN5	2.5976	2.50136	0.00315236	0.0862022	1.37718			6.3493	+		Schlafen family member 5 OS=Homo sapiens OX=9606 GN=SLFN5 PE=1 SV=1	0	43.422	16	9	123	9	891	101	8.22	36.19	9	0	0.886835	0.878163	0.778915	0.616105	1.02762	0.562149	-0.198514	-0.458913	-0.930193
Q12899	TRIM26	0.970781	0.145217	0.715785	0.868596	-0.0427817			-0.390919		RNF95 ZNF173	Tripartite motif-containing protein 26 OS=Homo sapiens OX=9606 GN=TRIM26 PE=1 SV=1	0	43.404	23	11	173	11	539	62.1	5.03	73.17	11	0	1.62858	1.44741	1.50097	0.981742	1.34654	1.5226	1.60287	1.71364	1.3888
Q8NI27	THOC2	0.936357	0.336904	0.460359	0.683679	-0.0948699			-0.815893		CXorf3	THO complex subunit 2 OS=Homo sapiens OX=9606 GN=THOC2 PE=1 SV=2	0	43.388	9	13	130	13	1593	182.7	8.44	50.2	13	0	0.840166	0.590288	0.863701	1.00498	1.13567	0.940698	0.999386	0.735414	0.843964
Q8TD19	NEK9	0.936277	0.174707	0.668795	0.845172	-0.0949929			-0.460932		KIAA1995 NEK8 NERCC	Serine/threonine-protein kinase Nek9 OS=Homo sapiens OX=9606 GN=NEK9 PE=1 SV=2	0	43.361	15	11	129	11	979	107.1	5.74	37.65	11	0	-0.269522	-0.125825	0.1028	0.211174	0.357816	-0.524864	-0.287442	0.31679	-0.0369167
O14974	PPP1R12A	0.436618	0.498495	0.317326	0.552202	-1.19556			-1.14159		MBS MYPT1	Protein phosphatase 1 regulatory subunit 12A OS=Homo sapiens OX=9606 GN=PPP1R12A PE=1 SV=1	0	43.317	15	12	46	12	1030	115.2	5.4	12	12	0	-4.34475	-0.8303	-2.08301	-1.88759	-4.85419	-1.94922	-1.38495	-0.829846	-1.45659
Q9UMS4	PRPF19	1.34869	1.11605	0.0765513	0.19991	0.431555			2.37323		NMP200 PRP19 SNEV	Pre-mRNA-processing factor 19 OS=Homo sapiens OX=9606 GN=PRPF19 PE=1 SV=1	0	43.304	31	10	165	10	504	55.1	6.61	55.04	10	0	2.34715	2.21187	2.36238	2.15758	2.18139	2.06542	2.16512	1.55916	1.90246
Q6ZVM7	TOM1L2	3.14588	1.13188	0.0738105	0.193746	1.65347			2.4068			TOM1-like protein 2 OS=Homo sapiens OX=9606 GN=TOM1L2 PE=1 SV=1	0	43.3	23	9	141	9	507	55.5	4.79	63.88	9	0	2.5103	2.22225	2.07365	1.99601	1.99524	1.98652	1.65035	-0.652652	0.84811
Q86UU1	PHLDB1	0.220712	0.791572	0.161595	0.335127	-2.17976			-1.71446		KIAA0638 LL5A	Pleckstrin homology-like domain family B member 1 OS=Homo sapiens OX=9606 GN=PHLDB1 PE=1 SV=1	0	43.255	11	13	85	13	1377	151.1	8.63	27.07	13	0	-4.73792	-1.47027	-1.0319	-2.2226	-2.63518	-4.46814	-0.210397	0.61982	-1.11022
Q6P158	DHX57	1.05103	0.032343	0.928233	0.966723	0.0718007			0.0958726			Putative ATP-dependent RNA helicase DHX57 OS=Homo sapiens OX=9606 GN=DHX57 PE=1 SV=2	0	43.149	12	14	112	13	1386	155.5	7.71	40.69	14	0	-3.0286	-2.55823	-3.12867	-3.97919	-2.56625	-2.80286	-2.99935	-1.70503	-4.22652
Q8IY81	FTSJ3	1.88033	0.502189	0.314638	0.54812	0.910987			1.14887			pre-rRNA 2'-O-ribose RNA methyltransferase FTSJ3 OS=Homo sapiens OX=9606 GN=FTSJ3 PE=1 SV=2	0	43.13	16	10	163	10	847	96.5	8.4	68.16	10	0	2.37696	2.08479	0.00140909	0.0610989	0.158505	-0.28429	0.332532	1.10303	0.294631
Q9UBX3	SLC25A10	1.11704	1.17321	0.0671106	0.185849	0.159681			2.49519		DIC	Mitochondrial dicarboxylate carrier OS=Homo sapiens OX=9606 GN=SLC25A10 PE=1 SV=2	0	43.055	40	9	165	9	287	31.3	9.54	76.25	9	0	2.38502	2.21009	2.25312	1.34729	1.68289	1.66378	2.16644	2.05071	2.15204
O00139	KIF2A	1.2421	1.30157	0.0499383	0.161362	0.312781			2.77765		KIF2 KNS2	Kinesin-like protein KIF2A OS=Homo sapiens OX=9606 GN=KIF2A PE=1 SV=3	0	42.991	17	12	214	11	706	79.9	6.68	106.96	12	0	1.96905	1.90891	2.15792	1.96845	2.13207	1.84086	1.70371	1.55151	1.84233
P11498	PC	0.823887	0.448892	0.35572	0.591771	-0.279482			-1.04328			Pyruvate carboxylase, mitochondrial OS=Homo sapiens OX=9606 GN=PC PE=1 SV=2	0	42.983	12	11	124	11	1178	129.6	6.84	48.47	11	0	0.366142	0.595125	-0.260449	0.770904	0.773924	0.766145	0.442016	0.672431	0.424819
Q9NVP1	DDX18	1.3552	1.97468	0.0106003	0.106038	0.438505			4.52715		cPERP-D	ATP-dependent RNA helicase DDX18 OS=Homo sapiens OX=9606 GN=DDX18 PE=1 SV=2	0	42.975	25	12	127	12	670	75.4	9.5	43.34	12	0	1.49114	1.24687	1.47693	0.26392	-0.0130654	0.608154	1.07808	0.912838	0.908514
Q8ND56	LSM14A	0.452166	1.46079	0.0346104	0.127791	-1.14508			-3.1471		C19orf13 FAM61A RAP55 RAP55A	Protein LSM14 homolog A OS=Homo sapiens OX=9606 GN=LSM14A PE=1 SV=3	0	42.924	21	10	92	10	463	50.5	9.52	34.67	10	0	-0.173307	-0.77468	0.0801746	-0.458636	0.150573	-0.207018	0.458594	1.34776	0.761068
Q9H2G2	SLK	2.62758	0.632754	0.232941	0.433551	1.39374			1.4042		KIAA0204 STK2	STE20-like serine/threonine-protein kinase OS=Homo sapiens OX=9606 GN=SLK PE=1 SV=1	0	42.805	13	12	84	11	1235	142.6	5.15	23.82	12	0	-2.3375	-0.858515	-1.36861	-0.703614	-0.976931	-1.37868	-2.30355	-1.76841	-4.67387
P04406	GAPDH	1.44718	0.938055	0.115331	0.262241	0.533241			2.00595		GAPD	Glyceraldehyde-3-phosphate dehydrogenase OS=Homo sapiens OX=9606 GN=GAPDH PE=1 SV=3	0	42.793	26	7	207	7	335	36	8.46	84.57	7	0	3.01171	3.83305	3.07268	3.16333	3.18012	3.20557	2.82406	2.72242	2.77123
P01024	C3	1.40776	1.86911	0.0135174	0.100955	0.493399			4.21632		CPAMD1	Complement C3 OS=Homo sapiens OX=9606 GN=C3 PE=1 SV=2	0	42.719	8	12	113	12	1663	187	6.4	46.54	12	0	2.03608	1.71724	2.08421	2.20415	2.37129	2.21552	1.42257	1.49268	1.44209
Q16658	FSCN1	6.65302	3.20029	0.000630531	0.08064	2.73401			9.70692	+	FAN1 HSN SNL	Fascin OS=Homo sapiens OX=9606 GN=FSCN1 PE=1 SV=3	0	42.625	31	11	78	11	493	54.5	7.24	23.42	11	0	-1.63966	-1.66055	-1.72932	-1.59297	-1.30646	-1.11479	-4.20904	-4.0581	-4.9644
Q8WV44	TRIM41	1.22319	0.282302	0.522033	0.734665	0.290649			0.700832		RINCK	E3 ubiquitin-protein ligase TRIM41 OS=Homo sapiens OX=9606 GN=TRIM41 PE=1 SV=3	0	42.601	21	11	84	11	630	71.6	5.06	26.51	11	0	1.10648	0.774102	0.015099	-1.34267	-2.41898	0.013463	0.437457	0.735957	-0.149673
Q9H6S1	AZI2	0.59628	2.33898	0.00458158	0.0893097	-0.745939			-5.73401	+	NAP1 TBKBP2	5-azacytidine-induced protein 2 OS=Homo sapiens OX=9606 GN=AZI2 PE=1 SV=1	0	42.559	26	10	138	10	392	44.9	6.6	74.71	10	0	0.766437	0.654385	0.846557	0.37525	0.628525	0.680733	1.59803	1.63932	1.26785
Q96PK6	RBM14	0.996784	0.0156846	0.964529	0.981073	-0.00464678			-0.0473163		SIP	RNA-binding protein 14 OS=Homo sapiens OX=9606 GN=RBM14 PE=1 SV=2	0	42.485	15	9	225	9	669	69.4	9.67	103.37	9	0	2.53933	2.41904	2.35204	2.57174	2.23664	2.3418	2.35003	2.60403	2.3703
Q13573	SNW1	0.572187	3.32866	0.000469182	0.0984444	-0.805441			-10.4766	+	SKIIP SKIP	SNW domain-containing protein 1 OS=Homo sapiens OX=9606 GN=SNW1 PE=1 SV=1	0	42.463	19	10	211	10	536	61.5	9.52	83.7	10	0	1.86102	1.94089	2.00691	1.65078	1.67809	1.7645	2.84711	2.75276	2.62527
Q9H4L5	OSBPL3	0.742111	1.24697	0.0566276	0.168241	-0.430293			-2.65597		KIAA0704 ORP3 OSBP3	Oxysterol-binding protein-related protein 3 OS=Homo sapiens OX=9606 GN=OSBPL3 PE=1 SV=1	0	42.441	15	12	120	11	887	101.2	6.87	32.53	12	1	-0.608739	-0.860452	-0.51595	-0.325152	-0.162361	-0.391964	-0.459823	-0.205767	-0.0286732
Q8NHW5	RPLP0P6	1.10263	0.282935	0.521273	0.734122	0.140947			0.702187			Putative ribosomal protein uL10-like OS=Homo sapiens OX=9606 GN=RPLP0P6 PE=5 SV=1	0	42.384	27	7	537	7	317	34.3	5.55	225.94	7	0	5.77214	5.63939	5.60141	5.39962	5.16999	5.49654	5.84368	5.17558	5.57084
P36507	MAP2K2	0.884296	1.109	0.0778037	0.201638	-0.177398			-2.35834		MEK2 MKK2 PRKMK2	Dual specificity mitogen-activated protein kinase kinase 2 OS=Homo sapiens OX=9606 GN=MAP2K2 PE=1 SV=1	0	42.332	26	10	138	5	400	44.4	6.55	58.4	10	0	0.0324574	0.261046	0.063604	0.304336	0.198568	0.496704	0.326345	0.312075	0.250882
Q9Y2W2	WBP11	0.852493	1.66332	0.0217109	0.111646	-0.23024			-3.65316		NPWBP SIPP1 SNP70	WW domain-binding protein 11 OS=Homo sapiens OX=9606 GN=WBP11 PE=1 SV=1	0	42.319	15	11	143	11	641	70	8.38	51.72	11	0	0.538956	0.405862	0.586726	-1.82241	-1.20947	-1.57259	0.765113	0.67674	0.78041
Q92973	TNPO1	1.13611	0.695285	0.201704	0.392778	0.184107			1.52602		KPNB2 MIP1 TRN	Transportin-1 OS=Homo sapiens OX=9606 GN=TNPO1 PE=1 SV=2	0	42.269	13	11	172	11	898	102.3	4.98	86.8	11	0	1.83053	1.91752	1.60284	1.91295	1.82526	2.08476	1.65835	1.44901	1.69121
P78344	EIF4G2	0.906995	0.452226	0.353	0.591312	-0.140834			-1.04992		DAP5	Eukaryotic translation initiation factor 4 gamma 2 OS=Homo sapiens OX=9606 GN=EIF4G2 PE=1 SV=1	0	42.253	14	12	109	12	907	102.3	7.14	45.37	12	0	1.46495	1.60561	1.86137	0.180872	0.370789	0.900459	1.6572	1.88568	1.81156
P26641	EEF1G	0.872893	1.10393	0.0787179	0.203143	-0.196123			-2.34764		EF1G	Elongation factor 1-gamma OS=Homo sapiens OX=9606 GN=EEF1G PE=1 SV=3	0	42.23	21	9	242	9	437	50.1	6.67	122.98	9	0	3.34973	3.5676	3.5743	3.37971	3.39457	3.33864	3.76685	3.68024	3.63292
A0A8I5KQE6	RPSA2	1.08867	0.401573	0.396668	0.628823	0.122561			0.948315		RPSA RPSAP58	Small ribosomal subunit protein uS2B OS=Homo sapiens OX=9606 GN=RPSA2 PE=3 SV=1	0	42.217	29	7	268	7	295	32.9	4.87	140.12	7	0	4.1939	4.55979	4.49864	4.10437	3.84497	4.11599	4.41838	4.21709	4.24918
O00429	DNM1L	1.1871	0.571866	0.268	0.481859	0.247447			1.28549		DLP1 DRP1	Dynamin-1-like protein OS=Homo sapiens OX=9606 GN=DNM1L PE=1 SV=2	0	42.176	16	10	149	10	736	81.8	6.81	68.3	10	0	1.21411	1.51482	1.17451	1.36545	1.52884	1.76572	1.13334	0.745984	1.28178
Q9H8H2	DDX31	1.30247	1.53189	0.0293843	0.118493	0.381248			3.31979			Probable ATP-dependent RNA helicase DDX31 OS=Homo sapiens OX=9606 GN=DDX31 PE=1 SV=2	0	42.128	16	11	135	11	851	94	9.99	41.89	11	0	0.74621	0.617192	0.789335	0.594753	0.697471	0.535801	0.538391	0.204954	0.265648
Q99459	CDC5L	1.0245	0.162978	0.687104	0.852567	0.0349172			0.433353		KIAA0432 PCDC5RP	Cell division cycle 5-like protein OS=Homo sapiens OX=9606 GN=CDC5L PE=1 SV=2	0	42.112	22	12	87	12	802	92.2	8.18	37.72	12	0	0.453583	0.393018	0.318205	0.303541	0.549465	-0.285247	0.452686	0.217212	0.390157
O60488	ACSL4	1.33708	0.40574	0.39288	0.626073	0.419088			0.956734		ACS4 FACL4 LACS4	Long-chain-fatty-acid--CoA ligase 4 OS=Homo sapiens OX=9606 GN=ACSL4 PE=1 SV=2	0	42.029	15	9	175	8	711	79.1	8.38	73.29	9	0	-0.221029	0.622458	0.563738	0.909387	0.885965	1.0143	-0.388962	-0.490149	0.587013
O15042	U2SURP	1.65462	1.97233	0.0106578	0.105604	0.726496			4.52007	+	KIAA0332 SR140	U2 snRNP-associated SURP motif-containing protein OS=Homo sapiens OX=9606 GN=U2SURP PE=1 SV=2	0	42.01	11	9	154	9	1029	118.2	8.47	66.02	9	0	0.942223	0.869498	0.619576	0.513143	1.06811	0.532882	-0.139915	0.302048	0.0896764
Q92538	GBF1	0.984121	0.100343	0.793702	0.900435	-0.023092			-0.279523		KIAA0248	Golgi-specific brefeldin A-resistance guanine nucleotide exchange factor 1 OS=Homo sapiens OX=9606 GN=GBF1 PE=1 SV=3	0	41.938	9	13	92	13	1860	206.4	5.73	25.11	13	0	0.509768	0.358858	0.429021	0.610197	0.110252	0.509074	0.594129	0.366712	0.406081
Q9H4H8	FAM83D	0.69573	1.85887	0.0138398	0.100331	-0.5234			-4.18701		C20orf129	Protein FAM83D OS=Homo sapiens OX=9606 GN=FAM83D PE=1 SV=3	0	41.909	29	11	141	11	585	64.4	6.54	53.97	11	0	0.599365	0.686844	0.886867	-0.140477	0.326417	0.427918	1.09114	1.4083	1.24384
Q9H9C1	VIPAS39	0.92292	0.331792	0.465809	0.688363	-0.115722			-0.805264		C14orf133 SPE39 VIPAR	Spermatogenesis-defective protein 39 homolog OS=Homo sapiens OX=9606 GN=VIPAS39 PE=1 SV=1	0	41.906	34	12	97	12	493	57	7.4	27.92	12	0	-0.956193	-0.932987	-1.18005	-1.66069	-1.04173	-1.6109	-1.09984	-0.686402	-0.935818
O00622	CCN1	0.742629	1.36292	0.0433589	0.145506	-0.429287			-2.91733		CYR61 GIG1 IGFBP10	CCN family member 1 OS=Homo sapiens OX=9606 GN=CCN1 PE=1 SV=1	0	41.796	31	10	238	10	381	42	8.21	125.88	10	0	2.84852	2.65687	3.0068	2.54539	2.46904	2.66764	3.39363	3.3521	3.05432
P23528	CFL1	1.03192	0.0580469	0.874889	0.941194	0.0453329			0.167791		CFL	Cofilin-1 OS=Homo sapiens OX=9606 GN=CFL1 PE=1 SV=3	0	41.795	54	7	99	5	166	18.5	8.09	39.27	7	2	2.43477	3.32782	3.05381	3.35617	3.369	3.75981	2.90382	2.98624	2.79035
Q9Y4W2	LAS1L	1.0385	0.11427	0.768653	0.889479	0.0545073			0.314797			Ribosomal biogenesis protein LAS1L OS=Homo sapiens OX=9606 GN=LAS1L PE=1 SV=2	0	41.763	21	11	138	11	734	83	4.73	60.31	11	0	0.477547	0.815831	0.696374	0.902075	1.05896	1.27412	0.880665	0.401682	0.543883
Q6NZI2	CAVIN1	0.983442	0.0610075	0.868945	0.940515	-0.0240878			-0.175863		PTRF	Caveolae-associated protein 1 OS=Homo sapiens OX=9606 GN=CAVIN1 PE=1 SV=1	0	41.724	26	10	172	10	390	43.5	5.6	72.16	10	0	3.11159	2.89124	3.1389	3.25417	3.13212	3.10424	3.29594	2.95644	2.96161
P53985	SLC16A1	1.07738	0.745491	0.179684	0.364162	0.107526			1.62407		MCT1	Monocarboxylate transporter 1 OS=Homo sapiens OX=9606 GN=SLC16A1 PE=1 SV=3	0	41.647	16	6	87	6	500	53.9	8.66	38.38	6	0	2.5914	2.43971	2.44787	2.5968	2.60428	2.3696	2.36995	2.31779	2.46867
Q92621	NUP205	0.87564	0.430866	0.370795	0.604015	-0.191591			-1.00726		C7orf14 KIAA0225	Nuclear pore complex protein Nup205 OS=Homo sapiens OX=9606 GN=NUP205 PE=1 SV=3	0	41.645	7	11	56	11	2012	227.8	6.19	17.13	11	0	-0.916982	-1.3251	-0.988683	-1.29442	-0.64229	-1.03742	-1.01073	-1.04459	-0.60067
P30876	POLR2B	1.0546	0.640453	0.228848	0.429357	0.0766908			1.41919			DNA-directed RNA polymerase II subunit RPB2 OS=Homo sapiens OX=9606 GN=POLR2B PE=1 SV=1	0	41.598	10	9	110	9	1174	133.8	6.87	33.31	9	0	1.28445	1.36291	1.33532	1.31301	1.15652	0.986456	1.28105	1.1552	1.31637
Q5VYS8	TUT7	1.58392	0.467105	0.34111	0.57759	0.663503			1.0795		HS2 KIAA1711 ZCCHC6	Terminal uridylyltransferase 7 OS=Homo sapiens OX=9606 GN=TUT7 PE=1 SV=1	0	41.506	10	12	92	12	1495	171.1	6.83	25.87	12	0	-3.30376	-1.45331	-1.48196	-2.37425	-3.40689	-3.03363	-2.643	-2.75057	-2.83597
Q99569	PKP4	0.923696	0.119278	0.75984	0.88912	-0.114509			-0.327319			Plakophilin-4 OS=Homo sapiens OX=9606 GN=PKP4 PE=1 SV=2	0	41.367	11	11	140	11	1192	131.8	8.94	43.6	11	0	-1.02646	-0.97974	-0.0979989	-0.914149	-2.79289	-1.28751	-0.359631	-0.466395	-0.934645
Q9NR31	SAR1A	1.13101	0.652673	0.222498	0.421376	0.177614			1.44299		SAR1 SARA SARA1	GTP-binding protein SAR1a OS=Homo sapiens OX=9606 GN=SAR1A PE=1 SV=1	0	41.359	32	10	364	8	198	22.4	6.68	130.48	10	2	3.58839	3.69552	3.46839	3.38603	3.6124	3.7061	3.57374	3.21534	3.43039
P50281	MMP14	1.0672	0.182501	0.6569	0.843153	0.0938268			0.479073			Matrix metalloproteinase-14 OS=Homo sapiens OX=9606 GN=MMP14 PE=1 SV=3	0	41.353	16	11	270	11	582	65.9	7.77	137.41	11	0	2.98737	2.69963	2.58466	3.80701	3.76512	3.98168	2.88424	2.36466	2.74128
Q9C0D5	TANC1	0.596038	1.3514	0.0445246	0.147085	-0.746525			-2.89086		KIAA1728	Protein TANC1 OS=Homo sapiens OX=9606 GN=TANC1 PE=1 SV=3	0	41.269	9	12	73	12	1861	202.1	8.32	15.95	12	0	-1.69709	-2.11969	-1.36661	-3.56935	-3.21539	-5.58644	-1.13983	-1.09874	-0.705238
Q9BZE4	GTPBP4	1.15372	0.42461	0.376175	0.606917	0.206295			0.994716		CRFG NOG1	GTP-binding protein 4 OS=Homo sapiens OX=9606 GN=GTPBP4 PE=1 SV=3	0	41.241	17	10	206	10	634	73.9	9.5	93.84	10	0	1.73281	1.58102	1.14634	1.23256	0.792096	0.241362	1.49499	1.21617	1.13013
P78347	GTF2I	0.768593	1.8918	0.0128293	0.101088	-0.379708			-4.2818		BAP135 WBSCR6	General transcription factor II-I OS=Homo sapiens OX=9606 GN=GTF2I PE=1 SV=2	0	41.211	12	11	107	11	998	112.3	6.39	31.74	11	0	0.251623	0.253198	0.34999	0.694998	0.468936	0.24634	0.604726	0.827739	0.56147
Q9UKD2	MRTO4	1.06876	0.218201	0.605061	0.806264	0.0959403			0.560475		C1orf33 MRT4	mRNA turnover protein 4 homolog OS=Homo sapiens OX=9606 GN=MRTO4 PE=1 SV=2	0	41.186	36	9	208	9	239	27.5	8.29	117.25	9	0	3.39633	3.24771	3.22109	3.03292	2.92571	3.08897	3.38865	2.87047	3.31819
Q9H361	PABPC3	1.19512	1.39191	0.0405594	0.142109	0.257158			2.98446		PABP3 PABPL3	Polyadenylate-binding protein 3 OS=Homo sapiens OX=9606 GN=PABPC3 PE=1 SV=2	0	41.172	12	8	296	6	631	70	9.67	120.87	8	0	4.66914	4.73691	4.84145	3.70491	3.6037	3.71123	4.62306	4.38338	4.46959
Q5JWF2	GNAS	1.87875	0.95128	0.111872	0.256114	0.909776			2.03267		GNAS1	Guanine nucleotide-binding protein G(s) subunit alpha isoforms XLas OS=Homo sapiens OX=9606 GN=GNAS PE=1 SV=2	0	41.15	11	10	289	10	1037	111	5.03	151.93	10	0	3.30688	3.29562	2.90849	3.2459	3.37038	2.91555	2.67714	1.40468	2.69985
P63092	GNAS	1.87875	0.95128	0.111872	0.255844	0.909776			2.03267		GNAS1 GSP	Guanine nucleotide-binding protein G(s) subunit alpha isoforms short OS=Homo sapiens OX=9606 GN=GNAS PE=1 SV=1	0	41.15	29	10	289	10	394	45.6	5.82	151.93	10	0	3.30688	3.29562	2.90849	3.2459	3.37038	2.91555	2.67714	1.40468	2.69985
Q9NSI2	SLX9	1.03486	0.0999348	0.794448	0.901077	0.04944			0.278479		C21orf70 FAM207A	Ribosome biogenesis protein SLX9 homolog OS=Homo sapiens OX=9606 GN=SLX9 PE=1 SV=2	0	41.068	43	10	179	10	230	25.4	11.08	76.55	10	0	0.803038	0.950683	0.809941	0.395058	0.260841	0.417194	1.12391	0.538997	0.75243
Q92552	MRPS27	1.16417	0.489814	0.323733	0.558556	0.219298			1.12445		KIAA0264	Small ribosomal subunit protein mS27 OS=Homo sapiens OX=9606 GN=MRPS27 PE=1 SV=3	0	40.99	33	11	151	11	414	47.6	6.18	70.94	11	0	1.92169	1.56961	1.84812	1.00383	1.33247	0.986368	1.70338	1.23549	1.74267
Q15717	ELAVL1	0.909363	0.370397	0.42619	0.659358	-0.137071			-0.884918		HUR	ELAV-like protein 1 OS=Homo sapiens OX=9606 GN=ELAVL1 PE=1 SV=2	0	40.978	33	8	258	8	326	36.1	9.17	111.28	8	0	2.09642	2.11365	2.40717	1.49036	1.58023	1.67075	2.34129	2.54724	2.13993
Q8N9T8	KRI1	0.693992	1.05204	0.088707	0.217434	-0.527009			-2.23913			Protein KRI1 homolog OS=Homo sapiens OX=9606 GN=KRI1 PE=1 SV=3	0	40.974	16	9	108	9	703	82.5	5.14	55.58	9	0	0.964195	0.929565	1.47323	0.878281	0.480375	1.02704	1.49083	1.96246	1.49472
P61158	ACTR3	2.12191	1.69031	0.0204028	0.10818	1.08536			3.72403	+	ARP3	Actin-related protein 3 OS=Homo sapiens OX=9606 GN=ACTR3 PE=1 SV=3	0	40.968	28	10	133	10	418	47.3	5.88	48.61	10	0	0.809153	1.37548	1.18281	1.45188	1.42352	1.49553	-0.0644071	-0.317311	0.49308
Q00688	FKBP3	2.84331	0.874535	0.133495	0.28753	1.50757			1.87861		FKBP25	Peptidyl-prolyl cis-trans isomerase FKBP3 OS=Homo sapiens OX=9606 GN=FKBP3 PE=1 SV=1	0	40.955	47	9	75	9	224	25.2	9.28	33.03	9	0	0.0507889	2.06351	0.305509	-1.36279	-0.576632	0.298162	-0.318793	-1.68032	-0.1038
O94905	ERLIN2	0.984411	0.0880367	0.816513	0.913964	-0.0226676			-0.247767		C8orf2 SPFH2	Erlin-2 OS=Homo sapiens OX=9606 GN=ERLIN2 PE=1 SV=1	0	40.949	33	11	116	8	339	37.8	5.62	48.83	11	3	1.20187	1.23744	1.1562	2.52169	2.44574	2.62403	1.398	1.1332	1.13232
Q05639	EEF1A2	1.11176	0.403827	0.394614	0.626172	0.152842			0.952871		EEF1AL STN	Elongation factor 1-alpha 2 OS=Homo sapiens OX=9606 GN=EEF1A2 PE=1 SV=1	0	40.862	25	8	428	2	463	50.4	9.03	203.4	8	0	-1.89774	-2.23972	-1.75349	-2.59642	-2.31425	-5.79669	-2.25363	-2.02116	-2.07468
Q9UN86	G3BP2	1.03831	0.172	0.672977	0.847681	0.0542306			0.454597		KIAA0660	Ras GTPase-activating protein-binding protein 2 OS=Homo sapiens OX=9606 GN=G3BP2 PE=1 SV=2	0	40.813	21	8	145	7	482	54.1	5.55	58.01	8	0	2.36549	2.39425	2.64367	1.20153	0.0793727	0.303321	2.56919	2.3022	2.36933
Q86X29	LSR	0.908271	0.342501	0.454463	0.680215	-0.138806			-0.827502		ILDR3 LISCH	Lipolysis-stimulated lipoprotein receptor OS=Homo sapiens OX=9606 GN=LSR PE=1 SV=4	0	40.792	18	9	101	9	649	71.4	7.97	40.89	9	0	1.36322	0.979332	1.12786	1.23358	1.20179	1.09234	1.40998	1.04573	1.43111
Q6P2H3	CEP85	0.646935	1.47544	0.0334627	0.125328	-0.628308			-3.18226		CCDC21	Centrosomal protein of 85 kDa OS=Homo sapiens OX=9606 GN=CEP85 PE=1 SV=1	0	40.755	14	11	145	11	762	85.6	6	55.6	11	0	0.639345	0.398612	0.886015	-0.79218	-0.174634	-0.140119	1.30524	1.48974	1.01391
Q14134	TRIM29	0.673972	1.09701	0.0799815	0.206079	-0.569239			-2.33308		ATDC	Tripartite motif-containing protein 29 OS=Homo sapiens OX=9606 GN=TRIM29 PE=1 SV=2	0	40.755	24	12	155	12	588	65.8	7.15	50.7	12	0	0.358097	1.06675	0.439454	-0.256322	-1.20873	-1.03313	1.30651	0.998064	1.26744
P83111	LACTB	1.2709	0.424268	0.376471	0.606679	0.345855			0.994031		MRPL56	Serine beta-lactamase-like protein LACTB, mitochondrial OS=Homo sapiens OX=9606 GN=LACTB PE=1 SV=2	0	40.743	22	10	98	10	547	60.7	8.53	26.4	10	0	-0.94214	-0.811767	-1.04202	0.0365536	-0.6252	0.108725	-0.66843	-1.31549	-1.84957
P23921	RRM1	0.978436	0.224499	0.596349	0.801923	-0.0314508			-0.574572		RR1	Ribonucleoside-diphosphate reductase large subunit OS=Homo sapiens OX=9606 GN=RRM1 PE=1 SV=1	0	40.72	15	9	113	9	792	90	7.15	48.7	9	0	0.69273	0.855355	0.75605	0.798133	1.17938	1.13201	0.845762	0.802124	0.750601
Q9Y2A7	NCKAP1	1.35554	1.78605	0.0163662	0.103832	0.438868			3.98255		HEM2 KIAA0587 NAP1	Nck-associated protein 1 OS=Homo sapiens OX=9606 GN=NCKAP1 PE=1 SV=1	0	40.713	10	10	167	10	1128	128.7	6.62	58.79	10	0	0.449101	0.313422	0.4918	0.396636	1.12572	0.10163	-0.120244	-0.113611	0.171574
P49756	RBM25	1.05345	0.137027	0.729413	0.875637	0.0751172			0.371055		RNPC7	RNA-binding protein 25 OS=Homo sapiens OX=9606 GN=RBM25 PE=1 SV=3	0	40.68	16	10	94	10	843	100.1	6.32	37.82	10	0	0.870878	0.627267	1.01639	1.19039	1.12421	1.27613	0.441061	1.00486	0.843267
Q641Q2	WASHC2A	0.72908	0.588577	0.257883	0.467424	-0.455851			-1.3181		FAM21A FAM21B	WASH complex subunit 2A OS=Homo sapiens OX=9606 GN=WASHC2A PE=1 SV=3	0	40.672	13	11	58	11	1341	147.1	4.81	10.12	11	0	0.13772	-0.0876595	-0.268027	0.773601	-0.030816	0.0947945	1.01845	0.187343	-0.0562019
Q9UL03	INTS6	1.01514	0.0523372	0.886467	0.947327	0.0216845			0.152106		DBI1 DDX26 DDX26A	Integrator complex subunit 6 OS=Homo sapiens OX=9606 GN=INTS6 PE=1 SV=1	0	40.61	21	12	83	12	887	100.3	8.62	24.45	12	0	-0.6425	-0.418428	-0.679853	-0.0707557	-0.259831	-0.181122	-0.830566	-0.529824	-0.445444
Q92896	GLG1	0.983256	0.0138095	0.968703	0.982852	-0.0243612			-0.041745		CFR1 ESL1 MG160	Golgi apparatus protein 1 OS=Homo sapiens OX=9606 GN=GLG1 PE=1 SV=2	0	40.559	10	10	178	10	1179	134.5	6.9	85.54	10	0	0.0901108	1.22864	0.289937	1.54995	1.75559	1.59021	1.16478	-0.356592	0.873575
Q5H9R7	PPP6R3	0.817168	0.133192	0.735882	0.88017	-0.291295			-0.361687		C11orf23 KIAA1558 PP6R3 SAPL SAPS3	Serine/threonine-protein phosphatase 6 regulatory subunit 3 OS=Homo sapiens OX=9606 GN=PPP6R3 PE=1 SV=2	0	40.476	15	9	89	9	873	97.6	4.6	31.25	9	0	-1.55624	-2.58149	-0.738938	-1.1692	-0.254336	-1.88639	-2.53285	-0.608123	-0.861815
Q9H8Y5	ANKZF1	1.16832	0.68688	0.205646	0.399173	0.224437			1.50963		ZNF744	tRNA endonuclease ANKZF1 OS=Homo sapiens OX=9606 GN=ANKZF1 PE=1 SV=1	0	40.459	18	10	116	10	726	80.9	8.41	46.71	10	0	0.357471	0.209647	0.201689	0.691005	0.676193	0.549244	0.148085	-0.246463	0.193877
Q8IX01	SUGP2	1.05518	0.0806725	0.830477	0.922561	0.0774838			0.228482		KIAA0365 SFRS14	SURP and G-patch domain-containing protein 2 OS=Homo sapiens OX=9606 GN=SUGP2 PE=1 SV=2	0	40.424	13	10	70	10	1082	120.1	7.28	19.03	10	0	0.130571	0.180231	0.644294	0.947003	1.09181	0.94807	0.0487324	0.823819	-0.149906
P40763	STAT3	0.938192	0.600316	0.251006	0.45826	-0.0920453			-1.341		APRF	Signal transducer and activator of transcription 3 OS=Homo sapiens OX=9606 GN=STAT3 PE=1 SV=2	0	40.23	18	10	89	10	770	88	6.3	28.35	10	0	-0.170131	-0.0579283	-0.167331	0.193008	0.664307	0.296222	0.0322077	-0.154192	0.00272998
Q16630	CPSF6	1.17437	1.2097	0.0617025	0.173627	0.231892			2.57423		CFIM68	Cleavage and polyadenylation specificity factor subunit 6 OS=Homo sapiens OX=9606 GN=CPSF6 PE=1 SV=2	0	40.176	20	9	149	9	551	59.2	7.15	61.2	9	0	2.13855	2.10246	2.02779	1.84039	1.88631	1.82677	1.69931	1.98522	1.8886
Q96PY5	FMNL2	0.936174	0.0886029	0.81545	0.91306	-0.0951517			-0.249241		FHOD2 KIAA1902	Formin-like protein 2 OS=Homo sapiens OX=9606 GN=FMNL2 PE=1 SV=3	0	40.157	12	12	56	9	1086	123.2	7.4	14.71	12	0	-1.88983	-1.7918	-2.28864	-4.67383	-2.14393	-2.68506	-1.25533	-2.46204	-1.96744
P62195	PSMC5	0.995501	0.00506503	0.988405	0.994203	-0.00650561			-0.0154607		SUG1	26S proteasome regulatory subunit 8 OS=Homo sapiens OX=9606 GN=PSMC5 PE=1 SV=1	0	40.017	28	9	155	9	406	45.6	7.55	49.25	9	0	0.763418	0.821924	-0.395924	-0.462493	-0.418789	0.687697	0.39222	0.65191	0.164806
P13674	P4HA1	1.76324	2.61348	0.00243514	0.0765479	0.818225			6.80602	+	P4HA	Prolyl 4-hydroxylase subunit alpha-1 OS=Homo sapiens OX=9606 GN=P4HA1 PE=1 SV=2	0	39.997	21	8	125	8	534	61	6.01	45.76	8	0	0.0864372	0.4295	0.17886	0.994718	1.17464	0.815651	-0.480916	-0.580582	-0.69838
Q9BXS4	TMEM59	1.22229	0.47034	0.338579	0.575183	0.289591			1.08592		C1orf8	Transmembrane protein 59 OS=Homo sapiens OX=9606 GN=TMEM59 PE=1 SV=1	0	39.971	28	7	232	7	323	36.2	5.1	112.5	7	0	3.52015	3.16627	3.20811	3.59423	3.62331	3.62427	3.34136	2.5374	3.14702
Q9Y4F5	CEP170B	1.10497	0.203778	0.625493	0.818515	0.144008			0.527906		FAM68C KIAA0284	Centrosomal protein of 170 kDa protein B OS=Homo sapiens OX=9606 GN=CEP170B PE=1 SV=4	0	39.915	10	13	71	13	1589	171.6	6.84	15.08	13	0	-1.65118	-1.39308	-1.6103	-3.07457	-3.89879	-2.25183	-1.18783	-2.05274	-1.84601
P18085	ARF4	0.763382	1.70765	0.0196043	0.106767	-0.389523			-3.77001		ARF2	ADP-ribosylation factor 4 OS=Homo sapiens OX=9606 GN=ARF4 PE=1 SV=3	0	39.913	44	8	333	3	180	20.5	7.14	145.38	8	0	3.13895	3.20954	3.44316	3.36225	3.61307	3.63764	3.68616	3.56041	3.71365
Q14166	TTLL12	1.27951	1.50482	0.0312738	0.12127	0.355593			3.25344		KIAA0153	Tubulin--tyrosine ligase-like protein 12 OS=Homo sapiens OX=9606 GN=TTLL12 PE=1 SV=2	0	39.85	22	9	123	9	644	74.4	5.53	36.76	9	0	0.812481	0.854832	0.863457	0.472641	0.740292	0.266136	0.481234	0.304137	0.678619
Q9NUQ6	SPATS2L	1.3816	1.37072	0.0425872	0.144699	0.466338			2.93532		DNAPTP6	SPATS2-like protein OS=Homo sapiens OX=9606 GN=SPATS2L PE=1 SV=2	0	39.696	21	10	202	10	558	61.7	9.64	65.43	10	0	1.33137	1.38278	1.3712	0.934495	0.967483	1.02098	1.11578	0.588855	0.98171
Q9H0H5	RACGAP1	1.09488	0.621647	0.238975	0.440478	0.130772			1.38257		KIAA1478 MGCRACGAP	Rac GTPase-activating protein 1 OS=Homo sapiens OX=9606 GN=RACGAP1 PE=1 SV=1	0	39.676	23	11	128	11	632	71	8.88	61.93	11	0	2.23263	2.12262	2.2327	0.755872	0.990548	0.807938	2.18604	1.89593	2.11367
Q14155	ARHGEF7	0.507911	1.66535	0.0216096	0.111914	-0.977354			-3.65846		COOL1 KIAA0142 P85SPR PAK3BP PIXB	Rho guanine nucleotide exchange factor 7 OS=Homo sapiens OX=9606 GN=ARHGEF7 PE=1 SV=2	0	39.571	13	10	149	10	803	90	7.09	62.43	10	0	0.737742	0.918239	1.48665	1.20651	0.925145	1.10414	1.9682	2.29602	1.81046
Q9H553	ALG2	1.19149	0.626393	0.236378	0.438201	0.252763			1.39181			Alpha-1,3/1,6-mannosyltransferase ALG2 OS=Homo sapiens OX=9606 GN=ALG2 PE=1 SV=1	0	39.543	28	9	157	9	416	47.1	7.05	65.04	9	0	1.4644	1.5521	1.13758	1.68622	1.99918	1.81019	1.38159	0.940208	1.07398
Q15262	PTPRK	1.06697	0.0566833	0.877641	0.941941	0.0935204			0.164059		PTPK	Receptor-type tyrosine-protein phosphatase kappa OS=Homo sapiens OX=9606 GN=PTPRK PE=1 SV=2	0	39.456	11	10	93	10	1439	162	5.9	25.58	10	0	-3.22384	-3.88535	-2.63197	-1.80818	-1.92719	-1.6206	-3.63024	-3.91599	-2.47549
Q9NUU7	DDX19A	0.993503	0.0315032	0.93003	0.968118	-0.00940323			-0.0934634		DDX19L	ATP-dependent RNA helicase DDX19A OS=Homo sapiens OX=9606 GN=DDX19A PE=1 SV=1	0	39.435	23	9	173	9	478	53.9	6.58	62.41	9	0	1.92455	2.0765	1.9632	1.63676	1.99629	2.0359	2.02465	1.83036	2.13745
Q86VM9	ZC3H18	1.2964	2.45576	0.00350137	0.0858333	0.374513			6.17117		NHN1	Zinc finger CCCH domain-containing protein 18 OS=Homo sapiens OX=9606 GN=ZC3H18 PE=1 SV=2	0	39.406	13	9	84	9	953	106.3	8.32	31.86	9	0	0.350422	0.285548	0.213316	0.213649	0.11219	0.161072	-0.0186616	-0.176528	-0.0790634
P00558	PGK1	1.58263	0.783116	0.164772	0.340579	0.662325			1.69784		PGKA	Phosphoglycerate kinase 1 OS=Homo sapiens OX=9606 GN=PGK1 PE=1 SV=3	0	39.392	29	9	177	9	417	44.6	8.1	71.07	9	0	1.2145	2.36192	1.43074	1.68037	1.69027	1.33303	0.703058	1.2836	1.03352
P98194	ATP2C1	1.6607	1.49855	0.0317286	0.121697	0.731787			3.23818		KIAA1347 PMR1L	Calcium-transporting ATPase type 2C member 1 OS=Homo sapiens OX=9606 GN=ATP2C1 PE=1 SV=3	0	39.35	15	9	115	9	919	100.5	6.74	43.05	9	0	0.536177	0.340315	0.265541	0.81636	0.701463	1.02353	-0.126208	-0.772983	-0.154139
Q14568	HSP90AA2P	0.933536	0.230863	0.587674	0.794944	-0.0992228			-0.588742		HSP90AA2 HSPCAL3	Heat shock protein HSP 90-alpha A2 OS=Homo sapiens OX=9606 GN=HSP90AA2P PE=1 SV=2	0	39.343	23	8	567	2	343	39.3	4.65	253.45	8	0	5.36982	5.77215	5.57835	5.64276	5.4543	5.76369	5.81311	5.42944	5.77545
Q8IXT5	RBM12B	0.995115	0.00896518	0.979569	0.989799	-0.00706455			-0.0272462			RNA-binding protein 12B OS=Homo sapiens OX=9606 GN=RBM12B PE=1 SV=2	0	39.338	13	11	139	11	1001	118	6.81	52.05	11	0	0.0925312	-0.202627	0.196246	-0.273589	-0.262416	-0.168488	-0.198034	0.49599	-0.190613
Q01970	PLCB3	1.97686	1.05544	0.0880148	0.217101	0.983208			2.2462			1-phosphatidylinositol 4,5-bisphosphate phosphodiesterase beta-3 OS=Homo sapiens OX=9606 GN=PLCB3 PE=1 SV=2	0	39.314	12	11	66	11	1234	138.7	5.9	18.4	11	0	-1.63127	-0.79285	-1.10708	-2.64926	-1.58938	-1.70455	-1.4342	-2.52255	-2.52407
P62937	PPIA	1.28302	0.976072	0.105664	0.245464	0.359546			2.083		CYPA	Peptidyl-prolyl cis-trans isomerase A OS=Homo sapiens OX=9606 GN=PPIA PE=1 SV=2	0	39.289	62	8	196	8	165	18	7.81	68.54	8	0	2.8692	3.10189	2.79302	2.95377	3.13975	3.16693	2.63042	2.28265	2.77239
P49674	CSNK1E	1.13895	0.225448	0.595048	0.801455	0.187701			0.576689			Casein kinase I isoform epsilon OS=Homo sapiens OX=9606 GN=CSNK1E PE=1 SV=1	0	39.271	25	9	207	3	416	47.3	9.66	84.57	9	4	0.347172	0.732186	0.339921	0.573311	0.821862	0.63963	0.780297	-0.25146	0.32734
O15084	ANKRD28	1.20381	0.799708	0.158596	0.330126	0.267606			1.73047		KIAA0379	Serine/threonine-protein phosphatase 6 regulatory ankyrin repeat subunit A OS=Homo sapiens OX=9606 GN=ANKRD28 PE=1 SV=5	0	39.221	12	9	89	8	1053	112.9	6.25	25.39	9	1	1.02123	0.991305	1.23114	0.791462	1.04812	0.992777	0.566913	1.03193	0.842014
O60264	SMARCA5	1.11408	0.128228	0.744341	0.882948	0.155849			0.349496		SNF2H WCRF135	SWI/SNF-related matrix-associated actin-dependent regulator of chromatin subfamily A member 5 OS=Homo sapiens OX=9606 GN=SMARCA5 PE=1 SV=1	0	39.207	11	11	66	11	1052	121.8	8.09	21.78	11	0	6.95634	6.51469	6.98809	7.21697	7.28076	7.53868	7.21225	5.84106	6.93827
Q8IXB1	DNAJC10	2.10569	1.26122	0.0548006	0.166396	1.07429			2.68749		ERDJ5	DnaJ homolog subfamily C member 10 OS=Homo sapiens OX=9606 GN=DNAJC10 PE=1 SV=2	0	39.2	21	11	87	11	793	91	7.18	27.06	11	0	-0.530613	-0.408823	-0.29524	-3.68272	-1.67396	-0.850225	-0.69822	-1.89529	-1.86404
Q15058	KIF14	2.21911	2.7099	0.00195032	0.0772414	1.14998			7.22133	+	KIAA0042	Kinesin-like protein KIF14 OS=Homo sapiens OX=9606 GN=KIF14 PE=1 SV=1	0	39.19	8	11	76	11	1648	186.4	7.91	25.3	11	0	1.04473	0.930425	1.02492	-0.195828	-0.176643	-0.0642315	-0.453628	-0.0545829	0.0583344
Q9NX58	LYAR	2.19963	0.628137	0.235431	0.436659	1.13726			1.39521			Cell growth-regulating nucleolar protein OS=Homo sapiens OX=9606 GN=LYAR PE=1 SV=3	0	39.145	28	8	65	8	379	43.6	9.57	21.43	8	0	0.565443	0.519921	-1.89355	-0.300077	-1.56148	-0.780093	-1.30099	-1.38226	-1.53673
P19525	EIF2AK2	1.01254	0.108124	0.779607	0.893666	0.0179727			0.299316		PKR PRKR	Interferon-induced, double-stranded RNA-activated protein kinase OS=Homo sapiens OX=9606 GN=EIF2AK2 PE=1 SV=2	0	39.055	24	10	105	10	551	62.1	8.4	41.58	10	0	0.897354	0.716032	0.867101	-1.4594	-1.07723	0.409159	0.76641	0.82465	0.835509
P35232	PHB1	1.15981	0.286357	0.517181	0.731051	0.213889			0.709503		PHB	Prohibitin 1 OS=Homo sapiens OX=9606 GN=PHB1 PE=1 SV=1	0	39.044	45	8	148	8	272	29.8	5.76	52.42	8	0	0.78198	1.79388	1.27017	1.84489	1.82928	1.72572	0.928663	1.09353	1.18217
Q8NHQ9	DDX55	1.63405	1.42947	0.0371989	0.133821	0.708453			3.07259		KIAA1595	ATP-dependent RNA helicase DDX55 OS=Homo sapiens OX=9606 GN=DDX55 PE=1 SV=3	0	39.025	19	10	118	10	600	68.5	9.25	41.15	10	0	0.321796	0.197616	-0.231794	-0.277	-0.231367	-1.09043	-0.767651	-0.29614	-0.773949
P22681	CBL	0.571297	1.32334	0.0474967	0.158164	-0.807688			-2.82685		CBL2 RNF55	E3 ubiquitin-protein ligase CBL OS=Homo sapiens OX=9606 GN=CBL PE=1 SV=2	0	38.928	14	10	118	10	906	99.6	6.54	38.95	10	0	-0.776272	-0.519151	0.0505515	-0.829246	-0.492909	-0.381772	0.154858	0.6647	0.358634
O00178	GTPBP1	1.41785	0.715131	0.192694	0.382763	0.503707			1.56474			GTP-binding protein 1 OS=Homo sapiens OX=9606 GN=GTPBP1 PE=1 SV=3	0	38.577	17	8	150	8	669	72.4	8.34	65.28	8	0	2.03109	2.13813	1.92405	1.25404	1.32672	1.30306	2.04091	0.951805	1.58944
Q9BWF3	RBM4	0.672673	1.95497	0.0110926	0.105782	-0.572022			-4.4679		RBM4A	RNA-binding protein 4 OS=Homo sapiens OX=9606 GN=RBM4 PE=1 SV=1	0	38.531	32	9	110	3	364	40.3	7.08	49.73	9	5	1.41747	1.55905	1.70155	1.18341	1.42421	1.58913	2.10924	2.31166	1.97324
P84085	ARF5	0.694952	1.75585	0.0175447	0.105813	-0.525014			-3.89978			ADP-ribosylation factor 5 OS=Homo sapiens OX=9606 GN=ARF5 PE=1 SV=2	0	38.523	45	8	225	2	180	20.5	6.79	77.23	8	0	-0.818132	-0.887319	-0.462383	-1.0576	-0.635845	-1.19048	-0.221611	-0.229801	-0.14138
P61204	ARF3	0.961794	0.132455	0.737131	0.880178	-0.0561998			-0.359884			ADP-ribosylation factor 3 OS=Homo sapiens OX=9606 GN=ARF3 PE=1 SV=2	0	38.466	44	8	233	2	181	20.6	7.43	78.77	8	6	3.04841	3.20336	3.16434	3.03033	3.26649	3.37576	3.29616	2.90143	3.38712
P84077	ARF1	0.961794	0.132455	0.737131	0.879844	-0.0561998			-0.359884			ADP-ribosylation factor 1 OS=Homo sapiens OX=9606 GN=ARF1 PE=1 SV=2	0	38.466	44	8	233	2	181	20.7	6.8	78.77	8	0	3.04841	3.20336	3.16434	3.03033	3.26649	3.37576	3.29616	2.90143	3.38712
P51151	RAB9A	1.11293	0.307781	0.492287	0.709025	0.154359			0.75496		RAB9	Ras-related protein Rab-9A OS=Homo sapiens OX=9606 GN=RAB9A PE=1 SV=1	0	38.407	49	7	253	7	201	22.8	5.47	127.57	7	0	3.3312	3.22773	3.10808	3.42999	3.42817	3.65051	3.34289	2.69333	3.16772
Q7Z4V5	HDGFL2	0.641832	1.16095	0.0690313	0.18752	-0.639733			-2.46886		HDGF2 HDGFRP2 HRP2	Hepatoma-derived growth factor-related protein 2 OS=Homo sapiens OX=9606 GN=HDGFL2 PE=1 SV=1	0	38.386	18	9	122	9	671	74.3	7.49	35.08	9	0	-0.594432	-0.242843	0.240465	-1.42656	-1.49725	-4.24592	0.544527	0.256071	0.521792
P04083	ANXA1	1.53	1.07307	0.0845141	0.210535	0.613531			2.28292		ANX1 LPC1	Annexin A1 OS=Homo sapiens OX=9606 GN=ANXA1 PE=1 SV=2	0	38.37	33	9	141	9	346	38.7	7.02	57.96	9	0	1.92272	2.57364	1.6894	1.87986	2.12393	2.1535	1.39107	1.54194	1.41215
Q66K74	MAP1S	1.39731	0.895173	0.1273	0.280521	0.482654			1.91981		BPY2IP1 C19orf5 MAP8 VCY2IP1	Microtubule-associated protein 1S OS=Homo sapiens OX=9606 GN=MAP1S PE=1 SV=2	0	38.359	13	9	82	9	1059	112.1	7.3	28.06	9	0	0.948414	1.30258	0.471965	-0.0401423	-0.569947	0.291911	0.563891	0.393264	0.317842
Q9UHD8	SEPTIN9	0.991335	0.0349496	0.922679	0.962579	-0.0125552			-0.103324		KIAA0991 MSF SEPT9	Septin-9 OS=Homo sapiens OX=9606 GN=SEPTIN9 PE=1 SV=2	0	38.294	19	9	148	9	586	65.4	8.97	70.79	9	0	1.69599	1.89447	1.89993	1.31538	1.43438	1.38557	2.00474	1.65631	1.86701
Q7Z2T5	TRMT1L	0.988482	0.0540408	0.882997	0.945529	-0.0167137			-0.156802		C1orf25 TRM1L	TRMT1-like protein OS=Homo sapiens OX=9606 GN=TRMT1L PE=1 SV=2	0	38.261	18	9	121	9	733	81.7	7.88	45.88	9	0	1.4496	1.16325	1.45585	1.26112	1.42278	1.16756	1.31953	1.33638	1.46293
Q5SW79	CEP170	1.09321	0.348875	0.447842	0.674423	0.128565			0.840684		FAM68A KAB KIAA0470	Centrosomal protein of 170 kDa OS=Homo sapiens OX=9606 GN=CEP170 PE=1 SV=1	0	38.21	8	9	78	9	1584	175.2	7.11	31.35	9	0	0.157595	0.422015	0.509267	-0.250474	-0.0485704	-0.173384	0.455324	0.119448	0.128409
P08621	SNRNP70	1.04839	0.308588	0.491374	0.710341	0.0681698			0.756661		RNPU1Z RPU1 SNRP70 U1AP1	U1 small nuclear ribonucleoprotein 70 kDa OS=Homo sapiens OX=9606 GN=SNRNP70 PE=1 SV=2	0	38.187	20	8	193	8	437	51.5	9.94	87.46	8	0	2.93306	3.0236	3.17915	2.99695	2.93563	3.05636	3.04228	3.01983	2.86919
Q9Y2R4	DDX52	2.06929	1.76144	0.0173205	0.104616	1.04914			3.91501	+	ROK1	Probable ATP-dependent RNA helicase DDX52 OS=Homo sapiens OX=9606 GN=DDX52 PE=1 SV=4	0	38.183	22	9	82	9	599	67.4	9.67	17.44	9	0	-0.966404	-0.750826	-1.29164	-2.96	-2.51965	-1.49303	-2.02918	-1.68815	-2.43894
Q99570	PIK3R4	1.48923	1.56585	0.0271736	0.116217	0.574568			3.40414		VPS15	Phosphoinositide 3-kinase regulatory subunit 4 OS=Homo sapiens OX=9606 GN=PIK3R4 PE=1 SV=3	0	38.137	9	10	76	10	1358	153	7.17	24.45	10	0	0.0995026	-0.0556826	-0.402527	0.0247799	0.104259	0.430244	-0.62816	-0.600118	-0.854134
Q9NW82	WDR70	0.898803	0.249706	0.562722	0.767868	-0.153924			-0.630285			WD repeat-containing protein 70 OS=Homo sapiens OX=9606 GN=WDR70 PE=1 SV=1	0	38.129	15	10	88	10	654	73.2	6.33	38.03	10	0	0.510792	0.0938743	0.812075	0.0531231	-0.0069993	-0.266103	0.480416	0.880485	0.517611
Q9H223	EHD4	1.21899	0.650742	0.22349	0.421834	0.28569			1.43923		HCA10 HCA11 PAST4	EH domain-containing protein 4 OS=Homo sapiens OX=9606 GN=EHD4 PE=1 SV=1	0	38.122	19	10	154	6	541	61.1	6.76	59.94	10	0	1.04445	0.431681	0.877445	1.07796	1.25589	1.12024	0.581527	0.344655	0.570328
Q9NSD9	FARSB	1.38395	0.831024	0.147563	0.314348	0.468796			1.79226		FARSLB FRSB	Phenylalanine--tRNA ligase beta subunit OS=Homo sapiens OX=9606 GN=FARSB PE=1 SV=3	0	38.039	18	9	164	9	589	66.1	6.84	63.8	9	0	1.42836	1.23358	1.07935	0.959381	0.313274	0.477004	1.2507	0.45669	0.627521
A4D1E9	GTPBP10	1.48592	0.708471	0.195672	0.3866	0.57136			1.55174		OBGH2	GTP-binding protein 10 OS=Homo sapiens OX=9606 GN=GTPBP10 PE=1 SV=1	0	38.032	35	10	111	10	387	42.9	9.03	39.69	10	0	1.53353	1.53678	1.06425	1.59761	1.66224	1.50096	1.1597	0.141087	1.11969
P23526	AHCY	1.16611	0.385593	0.411535	0.642103	0.221701			0.915913		SAHH	Adenosylhomocysteinase OS=Homo sapiens OX=9606 GN=AHCY PE=1 SV=4	0	37.918	28	10	115	10	432	47.7	6.34	49.68	10	0	0.29376	0.863103	0.139886	-0.0221418	0.194365	0.0209636	0.259908	0.0161671	0.355572
Q14562	DHX8	2.18254	2.25	0.00562339	0.0887591	1.12601			5.41829	+	DDX8	ATP-dependent RNA helicase DHX8 OS=Homo sapiens OX=9606 GN=DHX8 PE=1 SV=1	0	37.873	13	11	58	11	1220	139.2	8.32	20.82	11	0	-1.09599	-0.879451	-0.401024	-0.935437	-0.825523	-1.13406	-1.86358	-1.97492	-1.91599
P61586	RHOA	1.36348	1.05883	0.0873306	0.215878	0.447295			2.25325		ARH12 ARHA RHO12	Transforming protein RhoA OS=Homo sapiens OX=9606 GN=RHOA PE=1 SV=1	0	37.832	40	7	188	2	193	21.8	6.1	72.04	7	5	3.6178	3.02606	3.19687	3.21469	3.62205	3.54341	2.88201	2.65459	2.96224
Q14181	POLA2	1.02155	0.0289491	0.935515	0.972032	0.0307598			0.0861125			DNA polymerase alpha subunit B OS=Homo sapiens OX=9606 GN=POLA2 PE=1 SV=2	0	37.826	20	8	104	8	598	65.9	5.24	32.64	8	0	0.287023	-0.407221	0.644311	-1.13897	-1.5172	-1.19166	-0.106504	0.49244	0.0458987
Q5T280	SPOUT1	1.13086	0.20198	0.628087	0.82144	0.177424			0.523819		C9orf114	Putative methyltransferase C9orf114 OS=Homo sapiens OX=9606 GN=SPOUT1 PE=1 SV=3	0	37.823	33	9	121	9	376	42	7.43	47.29	9	0	1.23042	1.20179	1.32016	-0.810881	-2.50027	-1.70102	1.39102	0.400061	1.42902
Q15003	NCAPH	0.781191	1.33712	0.0460128	0.152583	-0.356253			-2.8582		BRRN BRRN1 CAPH KIAA0074	Condensin complex subunit 2 OS=Homo sapiens OX=9606 GN=NCAPH PE=1 SV=3	0	37.798	14	8	108	8	741	82.5	5.06	50.73	8	0	0.284761	0.234934	0.518444	-0.0590951	0.168695	-0.707835	0.87566	0.649603	0.581634
Q9Y2H5	PLEKHA6	0.617051	1.46911	0.0339538	0.12633	-0.696537			-3.16705		KIAA0969 PEPP3	Pleckstrin homology domain-containing family A member 6 OS=Homo sapiens OX=9606 GN=PLEKHA6 PE=1 SV=4	0	37.779	11	11	112	11	1048	117.1	9.1	35.33	11	0	-0.0650413	0.262296	0.294727	-0.985925	-1.12096	-0.84561	0.849598	1.19068	0.54132
P51812	RPS6KA3	1.37156	2.27083	0.00536007	0.0906154	0.455815			5.4909		ISPK1 MAPKAPK1B RSK2	Ribosomal protein S6 kinase alpha-3 OS=Homo sapiens OX=9606 GN=RPS6KA3 PE=1 SV=1	0	37.779	16	9	101	7	740	83.7	6.89	39.23	9	0	0.828594	0.705395	0.695984	0.692406	0.810853	0.914992	0.420358	0.265374	0.176796
Q9Y4E8	USP15	0.340172	0.396511	0.401319	0.634252	-1.55567			-0.93807		KIAA0529	Ubiquitin carboxyl-terminal hydrolase 15 OS=Homo sapiens OX=9606 GN=USP15 PE=1 SV=3	0	37.741	13	10	106	9	981	112.3	5.22	39.99	10	0	-3.36263	-5.30326	-0.00869613	-5.17379	0.517196	-3.77396	-1.4183	-0.259811	-2.32949
P52294	KPNA1	0.711228	1.41296	0.0386399	0.136546	-0.491615			-3.0337		RCH2	Importin subunit alpha-5 OS=Homo sapiens OX=9606 GN=KPNA1 PE=1 SV=3	0	37.726	20	9	206	6	538	60.2	5.01	101	9	2	1.68557	1.62958	1.80108	0.932518	1.57794	0.875832	1.95595	2.48353	2.1516
Q13131	PRKAA1	1.09942	0.579099	0.263573	0.474891	0.136747			1.29961		AMPK1	5'-AMP-activated protein kinase catalytic subunit alpha-1 OS=Homo sapiens OX=9606 GN=PRKAA1 PE=1 SV=4	0	37.688	14	9	208	9	559	64	8.12	78.67	9	0	1.4013	1.49284	1.16995	1.68155	1.77377	1.05749	1.23782	1.28029	1.13572
Q8TDN6	BRIX1	1.38587	0.906098	0.124137	0.273738	0.47079			1.94168		BRIX BXDC2	Ribosome biogenesis protein BRX1 homolog OS=Homo sapiens OX=9606 GN=BRIX1 PE=1 SV=2	0	37.687	32	9	131	9	353	41.4	9.92	46.02	9	0	1.40824	1.48322	1.29977	1.68988	1.72317	1.53817	1.39926	0.680791	0.698802
Q13443	ADAM9	0.738708	0.942891	0.114054	0.260574	-0.436923			-2.01571		KIAA0021 MCMP MDC9 MLTNG	Disintegrin and metalloproteinase domain-containing protein 9 OS=Homo sapiens OX=9606 GN=ADAM9 PE=1 SV=1	0	37.668	16	10	69	10	819	90.5	7.52	22.54	10	0	-0.392763	-0.664786	0.011844	-0.137784	0.145133	0.140522	0.171509	-0.0940946	0.18765
P62873	GNB1	0.967183	0.0877098	0.817128	0.914241	-0.0481387			-0.246916			Guanine nucleotide-binding protein G(I)/G(S)/G(T) subunit beta-1 OS=Homo sapiens OX=9606 GN=GNB1 PE=1 SV=3	0	37.655	32	9	291	4	340	37.4	6	152.24	9	5	3.71034	3.70051	3.88018	3.60203	3.68566	3.8294	4.04433	3.44401	3.9471
Q8N6T3	ARFGAP1	0.424254	1.68552	0.0206289	0.107346	-1.237			-3.7114	+	ARF1GAP	ADP-ribosylation factor GTPase-activating protein 1 OS=Homo sapiens OX=9606 GN=ARFGAP1 PE=1 SV=2	0	37.616	34	9	65	9	406	44.6	5.66	30.99	9	0	-0.88014	-1.45314	-0.416902	-0.623608	-0.371521	-0.25628	0.204866	0.609966	0.145984
Q15008	PSMD6	1.05041	0.10782	0.780154	0.893584	0.0709551			0.298545		KIAA0107 PFAAP4	26S proteasome non-ATPase regulatory subunit 6 OS=Homo sapiens OX=9606 GN=PSMD6 PE=1 SV=1	0	37.61	28	10	62	10	389	45.5	5.62	18.05	10	0	-1.0829	-0.868712	-0.837553	-0.980465	-0.474215	-0.604768	-1.0209	-1.37956	-0.601576
P47813	EIF1AX	1.22378	0.388065	0.409199	0.639014	0.291342			0.920938		EIF1A EIF4C	Eukaryotic translation initiation factor 1A, X-chromosomal OS=Homo sapiens OX=9606 GN=EIF1AX PE=1 SV=2	0	37.596	65	8	116	8	144	16.5	5.24	43.08	8	0	2.08909	1.45512	2.13612	1.44338	1.43713	1.45816	1.18031	1.96186	1.66414
Q6NUK1	SLC25A24	0.936358	1.0309	0.0931318	0.224786	-0.0948677			-2.19537		APC1 MCSC1 SCAMC1	Mitochondrial adenyl nucleotide antiporter SLC25A24 OS=Homo sapiens OX=9606 GN=SLC25A24 PE=1 SV=2	0	37.586	23	9	152	9	477	53.3	6.33	61.15	9	0	1.89803	1.87695	1.86247	1.85512	2.27046	2.09581	2.05362	1.91119	1.95724
P28288	ABCD3	1.13515	1.3712	0.0425406	0.144973	0.182877			2.93642		PMP70 PXMP1	ATP-binding cassette sub-family D member 3 OS=Homo sapiens OX=9606 GN=ABCD3 PE=1 SV=1	0	37.501	18	10	155	10	659	75.4	9.36	59.21	10	0	0.714251	0.763842	0.795014	0.911359	0.907374	0.860127	0.682638	0.556405	0.485432
P56182	RRP1	0.757255	1.42709	0.0374031	0.134969	-0.401149			-3.06698		D21S2056E NNP1 NOP52 RRP1A	Ribosomal RNA processing protein 1 homolog A OS=Homo sapiens OX=9606 GN=RRP1 PE=1 SV=1	0	37.457	17	8	126	8	461	52.8	9.33	52.88	8	0	2.15455	2.37863	2.59535	2.48283	2.05266	2.32307	2.71743	2.80002	2.81453
Q9Y2X3	NOP58	1.08728	0.217654	0.605823	0.806933	0.120719			0.559249		NOL5 NOP5	Nucleolar protein 58 OS=Homo sapiens OX=9606 GN=NOP58 PE=1 SV=1	0	37.439	24	9	107	9	529	59.5	8.92	43.69	9	0	1.1715	0.8709	1.11056	0.227664	0.384359	0.445611	1.09592	0.540921	1.15396
P26368	U2AF2	1.20928	0.721071	0.190077	0.378184	0.27415			1.57634		U2AF65	Splicing factor U2AF 65 kDa subunit OS=Homo sapiens OX=9606 GN=U2AF2 PE=1 SV=4	0	37.428	13	7	137	7	475	53.5	9.09	64.54	7	0	1.88025	1.88586	2.30072	1.65139	1.64062	1.49832	1.62064	1.66907	1.95467
P07996	THBS1	0.627368	1.59837	0.0252135	0.11429	-0.672615			-3.48603		TSP TSP1	Thrombospondin-1 OS=Homo sapiens OX=9606 GN=THBS1 PE=1 SV=2	0	37.394	10	9	101	9	1170	129.3	4.94	38.95	9	0	-0.42114	-0.820716	-0.209638	-1.30575	-1.15888	-0.447732	0.111851	0.331861	0.12264
Q9UI10	EIF2B4	1.76485	1.15733	0.0696094	0.187823	0.819548			2.4611		EIF2BD	Translation initiation factor eIF2B subunit delta OS=Homo sapiens OX=9606 GN=EIF2B4 PE=1 SV=2	0	37.392	23	9	165	9	523	57.5	9.38	51.48	9	0	1.28805	1.25889	1.31843	1.2487	1.38345	1.5496	1.12083	0.0287786	0.257122
P50991	CCT4	1.10969	0.441009	0.362236	0.600958	0.150156			1.02755		CCTD SRB	T-complex protein 1 subunit delta OS=Homo sapiens OX=9606 GN=CCT4 PE=1 SV=4	0	37.381	18	9	234	9	539	57.9	7.83	116.49	9	0	3.09504	2.9199	3.03565	2.78227	2.7553	2.86344	2.99112	2.5935	3.01549
P13667	PDIA4	0.693016	1.33084	0.0466826	0.15649	-0.529039			-2.84391		ERP70 ERP72	Protein disulfide-isomerase A4 OS=Homo sapiens OX=9606 GN=PDIA4 PE=1 SV=2	0	37.351	19	10	105	10	645	72.9	5.07	37.05	10	0	-0.00466269	0.535104	0.381316	1.00914	1.15338	1.13186	0.715856	1.0188	0.764222
Q8N6R0	METTL13	0.958015	0.314087	0.485191	0.706737	-0.0618797			-0.768234		EEF1AKNMT FEAT KIAA0859	eEF1A lysine and N-terminal methyltransferase OS=Homo sapiens OX=9606 GN=METTL13 PE=1 SV=1	0	37.34	16	10	135	10	699	78.7	6.73	50.33	10	0	0.378071	0.562163	0.373816	0.0796122	-0.473015	-0.225702	0.447183	0.449989	0.602517
P00533	EGFR	1.02861	0.07318	0.844929	0.927835	0.0406893			0.208632		ERBB ERBB1 HER1	Epidermal growth factor receptor OS=Homo sapiens OX=9606 GN=EGFR PE=1 SV=2	0	37.332	9	10	152	9	1210	134.2	6.68	61.19	10	1	1.53889	1.32086	1.32596	1.9642	2.02429	2.15843	1.56577	0.993664	1.50421
P14314	PRKCSH	0.653773	1.54694	0.0283829	0.117875	-0.613137			-3.35703		G19P1	Glucosidase 2 subunit beta OS=Homo sapiens OX=9606 GN=PRKCSH PE=1 SV=2	0	37.31	20	8	148	8	528	59.4	4.41	62.92	8	0	-0.237234	-0.845181	-0.548311	0.665264	1.04736	0.45807	0.0815818	0.150442	-0.0233383
Q96T37	RBM15	1.11433	0.984777	0.103567	0.241687	0.156172			2.10073		OTT OTT1	RNA-binding protein 15 OS=Homo sapiens OX=9606 GN=RBM15 PE=1 SV=2	0	37.289	12	9	88	8	977	107.1	10.08	29.31	9	1	0.420864	0.279667	0.426471	0.283965	0.453016	0.562582	0.201752	0.131291	0.325444
Q9Y2X7	GIT1	0.357385	1.53791	0.0289797	0.116544	-1.48445			-3.33465	+		ARF GTPase-activating protein GIT1 OS=Homo sapiens OX=9606 GN=GIT1 PE=1 SV=2	0	37.284	15	9	113	6	761	84.3	6.8	47.37	9	0	-2.06128	-1.01034	-0.810585	-0.657548	-0.894547	-1.09402	-0.211183	0.539888	0.242429
Q86U38	NOP9	0.597713	2.66475	0.00216395	0.0766875	-0.742475			-7.0242	+	C14orf21 KIAA2021	Nucleolar protein 9 OS=Homo sapiens OX=9606 GN=NOP9 PE=1 SV=1	0	37.279	22	8	92	8	636	69.4	7.28	35.11	8	0	-1.29331	-1.30638	-1.16706	-1.96314	-1.44877	-1.80503	-0.451797	-0.386354	-0.701181
Q9BS26	ERP44	1.19965	0.933098	0.116655	0.264707	0.262618			1.99595		KIAA0573 TXNDC4	Endoplasmic reticulum resident protein 44 OS=Homo sapiens OX=9606 GN=ERP44 PE=1 SV=1	0	37.182	22	8	146	8	406	46.9	5.26	53.47	8	0	1.14948	1.47885	1.32878	1.6887	1.88137	1.92858	1.09449	0.883579	1.19119
Q9UBF2	COPG2	1.08014	0.125115	0.749695	0.885175	0.111221			0.341812			Coatomer subunit gamma-2 OS=Homo sapiens OX=9606 GN=COPG2 PE=1 SV=1	0	37.127	17	10	75	10	871	97.6	5.81	25.62	10	0	0.03442	0.404967	0.357687	0.619159	0.66714	0.676338	0.456138	-0.453204	0.460476
P26358	DNMT1	1.71098	1.54667	0.028401	0.11733	0.774823			3.35634		AIM CXXC9 DNMT	DNA (cytosine-5)-methyltransferase 1 OS=Homo sapiens OX=9606 GN=DNMT1 PE=1 SV=2	0	37.054	10	12	73	12	1616	183.1	7.75	18.59	12	0	-0.835236	-0.192514	-0.342344	-4.17656	-3.70258	-3.81976	-1.38529	-1.32513	-0.98415
Q13488	TCIRG1	0.887749	0.781351	0.165443	0.341611	-0.171776			-1.69437		ATP6N1C ATP6V0A3	V-type proton ATPase 116 kDa subunit a 3 OS=Homo sapiens OX=9606 GN=TCIRG1 PE=1 SV=3	0	37	15	11	102	11	830	92.9	7.12	34.98	11	0	2.07304	2.15132	2.19514	3.00161	3.04415	3.23559	2.49908	2.19242	2.24332
Q96KP1	EXOC2	1.13915	0.572014	0.267908	0.481575	0.187964			1.28578		SEC5 SEC5L1	Exocyst complex component 2 OS=Homo sapiens OX=9606 GN=EXOC2 PE=1 SV=1	0	36.971	14	11	96	11	924	104	6.9	30.53	11	0	0.159151	0.358277	0.2177	0.379437	0.546607	0.500534	0.160726	-0.208243	0.218754
Q9Y4L1	HYOU1	0.656069	0.224324	0.596591	0.801846	-0.608082			-0.57418		GRP170 ORP150	Hypoxia up-regulated protein 1 OS=Homo sapiens OX=9606 GN=HYOU1 PE=1 SV=1	0	36.97	11	9	68	9	999	111.3	5.22	18.57	9	0	-0.607454	0.536863	-0.138144	-0.0199299	0.882636	0.398978	-0.278196	-0.644868	2.53857
Q14566	MCM6	0.614242	0.619691	0.240054	0.441165	-0.703121			-1.37876			DNA replication licensing factor MCM6 OS=Homo sapiens OX=9606 GN=MCM6 PE=1 SV=1	0	36.965	14	11	104	11	821	92.8	5.41	40.47	11	0	0.358341	-0.901164	0.3733	0.0929884	-0.186513	-0.769681	0.808819	1.0402	0.0908214
P40939	HADHA	1.06655	0.275714	0.530013	0.740714	0.0929469			0.686697		HADH	Trifunctional enzyme subunit alpha, mitochondrial OS=Homo sapiens OX=9606 GN=HADHA PE=1 SV=2	0	36.904	22	11	139	11	763	82.9	9.04	67.25	11	0	1.09532	1.22045	1.43105	1.10488	0.924382	0.975083	1.34111	1.0417	1.08517
P22087	FBL	1.18456	0.677519	0.210127	0.403845	0.244353			1.49139		FIB1 FLRN	rRNA 2'-O-methyltransferase fibrillarin OS=Homo sapiens OX=9606 GN=FBL PE=1 SV=2	0	36.866	31	8	286	8	321	33.8	10.18	110.06	8	0	3.41467	3.3087	3.26347	3.11464	3.09414	3.10218	3.30854	2.78054	3.1647
Q13535	ATR	1.58014	2.51357	0.00306498	0.0877674	0.660053			6.39772	+	FRP1	Serine/threonine-protein kinase ATR OS=Homo sapiens OX=9606 GN=ATR PE=1 SV=3	0	36.854	4	10	87	10	2644	301.2	7.43	23.72	10	0	-0.573709	-0.725851	-0.551425	-0.439483	-0.617026	-0.690222	-1.359	-1.3698	-1.10234
P83881	RPL36A	0.980106	0.0522879	0.886568	0.947232	-0.0289899			-0.151969		RPL44	Large ribosomal subunit protein eL42 OS=Homo sapiens OX=9606 GN=RPL36A PE=1 SV=2	0	36.849	41	7	270	2	106	12.4	10.58	147.83	7	5	4.0785	4.01694	4.11105	3.74452	3.38158	3.6975	4.42965	3.77601	4.08781
P42285	MTREX	1.73436	1.42129	0.0379058	0.135853	0.794406			3.0533		DOB1 KIAA0052 MTR4 SKIV2L2	Exosome RNA helicase MTR4 OS=Homo sapiens OX=9606 GN=MTREX PE=1 SV=3	0	36.786	10	9	106	9	1042	117.7	6.52	42.97	9	0	1.58227	0.989869	1.43385	0.335539	1.05304	0.879554	0.706047	0.754361	0.162356
Q8NFW8	CMAS	1.21087	0.289432	0.513533	0.728373	0.276048			0.716062			N-acylneuraminate cytidylyltransferase OS=Homo sapiens OX=9606 GN=CMAS PE=1 SV=2	0	36.782	24	8	111	8	434	48.3	7.93	45.45	8	0	-0.56723	0.471025	0.599737	1.48291	1.49614	0.903885	0.0629915	-0.314119	-0.0734844
P25054	APC	0.660929	0.645305	0.226305	0.425273	-0.597434			-1.42864		DP2.5	Adenomatous polyposis coli protein OS=Homo sapiens OX=9606 GN=APC PE=1 SV=2	0	36.747	5	10	79	10	2843	311.5	7.8	20.49	10	0	-2.12339	-1.64804	-1.37914	-3.7763	-2.4154	-4.03279	-1.15175	-0.485348	-1.72117
O43615	TIMM44	1.14094	1.06254	0.0865875	0.215452	0.190219			2.26097		MIMT44 TIM44	Mitochondrial import inner membrane translocase subunit TIM44 OS=Homo sapiens OX=9606 GN=TIMM44 PE=1 SV=2	0	36.722	25	10	100	10	452	51.3	8.32	30.38	10	0	0.175154	0.433384	0.297343	-0.0336001	0.16008	0.0850653	0.187164	0.0572576	0.0908003
Q9UNX3	RPL26L1	1.05304	0.17257	0.672094	0.846941	0.0745624			0.455933		RPL26P1	Ribosomal protein uL24-like OS=Homo sapiens OX=9606 GN=RPL26L1 PE=1 SV=1	0	36.657	45	9	476	1	145	17.2	10.55	243.64	9	0	1.42569	1.0626	1.25489	0.880603	0.96469	0.839986	1.39886	0.965276	1.15536
Q86XP3	DDX42	1.03905	0.0447708	0.902047	0.953724	0.0552689			0.131071			ATP-dependent RNA helicase DDX42 OS=Homo sapiens OX=9606 GN=DDX42 PE=1 SV=1	0	36.652	14	10	98	10	938	102.9	7.02	32.64	10	0	0.0495529	-1.17052	-0.90332	-0.898188	-0.998146	-0.808485	-1.07846	-0.379619	-0.732016
O95613	PCNT	1.47432	0.151521	0.70547	0.862236	0.560053			0.406078		KIAA0402 PCNT2	Pericentrin OS=Homo sapiens OX=9606 GN=PCNT PE=1 SV=4	0	36.626	4	13	69	13	3336	377.8	5.55	18.26	13	0	-0.398769	-0.413387	-3.05237	0.46118	-3.29653	-3.36595	0.265908	-2.76443	-3.04617
O94925	GLS	0.940949	0.115277	0.766873	0.889343	-0.0878113			-0.317322		GLS1 KIAA0838	Glutaminase kidney isoform, mitochondrial OS=Homo sapiens OX=9606 GN=GLS PE=1 SV=1	0	36.615	16	8	75	8	669	73.4	7.77	28.13	8	0	0.144262	1.07734	0.479697	0.751908	0.651992	0.780788	0.57536	0.654707	0.734665
P61221	ABCE1	1.31491	0.925382	0.118746	0.267185	0.394968			1.98041		RLI RNASEL1 RNASELI RNS4I	ATP-binding cassette sub-family E member 1 OS=Homo sapiens OX=9606 GN=ABCE1 PE=1 SV=1	0	36.602	15	9	148	9	599	67.3	8.34	50.02	9	0	1.35907	0.92833	0.882859	1.17401	1.08018	1.22954	0.89003	0.441884	0.653444
Q68E01	INTS3	1.62316	1.10427	0.078655	0.203225	0.698806			2.34837		C1orf193 C1orf60	Integrator complex subunit 3 OS=Homo sapiens OX=9606 GN=INTS3 PE=1 SV=1	0	36.598	13	8	106	8	1043	118	5.8	31.05	8	0	-0.203449	-0.358292	-0.465639	-0.53669	-0.0684522	-0.312258	-0.845795	-1.60763	-0.670372
Q15418	RPS6KA1	1.08518	1.06991	0.0851316	0.211852	0.117932			2.27632		MAPKAPK1A RSK1	Ribosomal protein S6 kinase alpha-1 OS=Homo sapiens OX=9606 GN=RPS6KA1 PE=1 SV=2	0	36.476	15	9	72	7	735	82.7	7.83	24.23	9	2	1.30239	1.23087	1.19515	1.44487	2.84523	1.45033	1.14901	1.04473	1.18086
Q5JTW2	CEP78	2.09714	2.55914	0.00275969	0.0847089	1.06843			6.58126	+	C9orf81	Centrosomal protein of 78 kDa OS=Homo sapiens OX=9606 GN=CEP78 PE=1 SV=1	0	36.339	15	9	93	9	689	76.3	8.18	29.85	9	0	-0.696664	-0.728792	-0.965446	-3.08879	-0.882706	-2.13074	-2.14013	-1.75816	-1.69789
Q7Z4F1	LRP10	1.28515	0.289986	0.512878	0.727891	0.361937			0.717243			Low-density lipoprotein receptor-related protein 10 OS=Homo sapiens OX=9606 GN=LRP10 PE=1 SV=2	0	36.33	22	8	170	8	713	76.1	5.52	65.44	8	0	2.69992	1.97798	1.80918	2.78918	2.16861	2.35043	2.18645	0.952947	2.26187
Q63ZY3	KANK2	1.01578	0.0457986	0.899915	0.952965	0.0225821			0.133945		ANKRD25 KIAA1518 MXRA3 SIP	KN motif and ankyrin repeat domain-containing protein 2 OS=Homo sapiens OX=9606 GN=KANK2 PE=1 SV=1	0	36.268	13	9	127	9	851	91.1	5.63	53.96	9	0	0.300724	0.482447	0.282681	0.271037	0.135609	0.316055	0.502914	0.474161	0.021031
O00231	PSMD11	1.02493	0.0506174	0.889985	0.948843	0.0355217			0.14735			26S proteasome non-ATPase regulatory subunit 11 OS=Homo sapiens OX=9606 GN=PSMD11 PE=1 SV=3	0	36.266	24	9	147	9	422	47.4	6.48	56.36	9	0	0.770588	1.19864	0.735655	0.698807	1.07904	1.18356	0.540495	0.860501	1.19732
Q15678	PTPN14	0.750845	0.863202	0.137024	0.293796	-0.413414			-1.85606		PEZ PTPD2	Tyrosine-protein phosphatase non-receptor type 14 OS=Homo sapiens OX=9606 GN=PTPN14 PE=1 SV=2	0	36.246	13	10	94	10	1187	135.2	8.31	25.05	10	0	0.112755	-0.604015	-0.27939	0.125484	-0.295675	-0.652854	-0.00285545	0.205184	0.267262
P51149	RAB7A	1.1042	0.313799	0.485513	0.706105	0.143			0.767628		RAB7	Ras-related protein Rab-7a OS=Homo sapiens OX=9606 GN=RAB7A PE=1 SV=1	0	36.23	48	9	221	9	207	23.5	6.7	98.16	9	0	3.39424	3.35065	3.19582	3.67212	3.76981	3.66976	3.47267	2.86209	3.17694
O14981	BTAF1	1.61977	1.15549	0.0699058	0.18774	0.695791			2.45714		TAF172	TATA-binding protein-associated factor 172 OS=Homo sapiens OX=9606 GN=BTAF1 PE=1 SV=2	0	36.211	7	11	96	11	1849	206.8	6.52	26.54	11	0	-0.970037	-1.61391	-1.90525	-1.76444	-1.71376	-1.89917	-2.12526	-2.13518	-2.31613
O43824	GTPBP6	1.1734	0.325994	0.47207	0.694806	0.230694			0.793175		PGPL	Putative GTP-binding protein 6 OS=Homo sapiens OX=9606 GN=GTPBP6 PE=1 SV=4	0	36.145	22	10	133	10	516	56.9	9.42	50.02	10	0	2.07854	1.93832	1.65871	1.2695	1.32654	1.69748	2.17474	1.30301	1.50573
Q99439	CNN2	0.512918	2.34202	0.00454969	0.0901071	-0.9632			-5.74504	+		Calponin-2 OS=Homo sapiens OX=9606 GN=CNN2 PE=1 SV=4	0	36.123	28	8	201	7	309	33.7	7.33	99.74	8	0	1.7462	1.76392	1.9432	0.767951	1.47505	1.60037	2.67559	3.08689	2.58045
P00387	CYB5R3	1.58912	0.601255	0.250464	0.457834	0.668231			1.34283		DIA1	NADH-cytochrome b5 reductase 3 OS=Homo sapiens OX=9606 GN=CYB5R3 PE=1 SV=3	0	36.121	34	8	125	8	301	34.2	7.59	29.34	8	0	3.48729	2.24947	2.87045	3.50206	2.6935	2.38004	2.71975	1.54401	2.33876
P48729	CSNK1A1	1.06219	0.187285	0.649702	0.836777	0.0870358			0.490141			Casein kinase I isoform alpha OS=Homo sapiens OX=9606 GN=CSNK1A1 PE=1 SV=2	0	36.055	22	8	120	8	337	38.9	9.57	49.14	8	0	2.64973	2.30951	2.51115	2.79835	2.82878	2.76244	2.61254	2.11829	2.47843
Q9NXW2	DNAJB12	1.17327	1.35178	0.0444856	0.147346	0.23054			2.89173			DnaJ homolog subfamily B member 12 OS=Homo sapiens OX=9606 GN=DNAJB12 PE=1 SV=5	0	36.036	29	9	159	9	375	41.8	8.69	54.12	9	0	-0.0846988	-0.0262636	-0.11749	0.0403975	-0.255289	0.0402427	-0.340822	-0.162902	-0.416347
Q01105	SET	0.60725	0.832989	0.146896	0.313748	-0.719638			-1.79614			Protein SET OS=Homo sapiens OX=9606 GN=SET PE=1 SV=3	0	36.03	31	9	145	9	290	33.5	4.32	67.09	9	0	2.43681	2.53572	3.34818	3.21695	3.10894	3.04624	3.17375	4.04659	3.25928
Q8TB52	FBXO30	1.11121	0.176457	0.666106	0.845435	0.152132			0.465017		FBX30	F-box only protein 30 OS=Homo sapiens OX=9606 GN=FBXO30 PE=1 SV=3	0	36.009	18	9	139	9	745	82.3	5.4	58.07	9	0	1.57929	0.747759	1.48904	0.884721	0.949158	1.20684	1.47262	0.803528	1.08354
Q8N1G4	LRRC47	2.10166	0.926622	0.118407	0.266591	1.07153			1.98291		KIAA1185	Leucine-rich repeat-containing protein 47 OS=Homo sapiens OX=9606 GN=LRRC47 PE=1 SV=1	0	36.007	20	10	145	10	583	63.4	8.28	60.74	10	0	0.959801	1.28007	0.874517	1.06119	0.944457	1.26976	0.647087	-1.06864	0.32136
Q14596	NBR1	1.43269	1.01663	0.0962431	0.229899	0.518731			2.16597		1A13B KIAA0049 M17S2	Next to BRCA1 gene 1 protein OS=Homo sapiens OX=9606 GN=NBR1 PE=1 SV=3	0	35.947	9	8	150	8	966	107.3	5.12	53.25	8	0	1.87775	1.66307	1.41072	2.01072	1.46628	1.54595	1.44735	0.767277	1.18073
P26640	VARS1	0.829101	0.881241	0.13145	0.285979	-0.27038			-1.89198		G7A VARS VARS2	Valine--tRNA ligase OS=Homo sapiens OX=9606 GN=VARS1 PE=1 SV=4	0	35.934	9	10	105	10	1264	140.4	7.59	43.08	10	0	-0.223951	-0.189383	-0.308137	-0.305316	-0.159468	-0.565166	0.0142848	0.27718	-0.201797
Q08AM6	VAC14	0.848973	0.247876	0.565099	0.770693	-0.23621			-0.626275		TAX1BP2 TRX	Protein VAC14 homolog OS=Homo sapiens OX=9606 GN=VAC14 PE=1 SV=1	0	35.926	17	10	81	10	782	87.9	6.13	30.11	10	0	-1.14064	-1.39006	-0.451807	-0.792533	-0.297949	-0.298275	-0.268447	-0.898416	-1.10701
P15559	NQO1	1.13589	0.975959	0.105692	0.244662	0.183829			2.08277		DIA4 NMOR1	NAD(P)H dehydrogenase [quinone] 1 OS=Homo sapiens OX=9606 GN=NQO1 PE=1 SV=1	0	35.884	28	8	153	8	274	30.8	8.88	71.21	8	0	2.82248	3.12237	2.95885	2.40519	2.48943	2.46759	2.81161	2.75427	2.78633
P40429	RPL13A	1.13672	0.346178	0.450632	0.677113	0.184874			0.835111			Large ribosomal subunit protein uL13 OS=Homo sapiens OX=9606 GN=RPL13A PE=1 SV=2	0	35.878	31	7	696	7	203	23.6	10.93	375.28	7	0	6.64597	6.37061	6.43765	6.35237	6.12587	6.34016	6.6435	5.93353	6.32258
P11387	TOP1	1.14576	1.04471	0.0902167	0.220717	0.196299			2.22394			DNA topoisomerase 1 OS=Homo sapiens OX=9606 GN=TOP1 PE=1 SV=2	0	35.868	13	9	137	9	765	90.7	9.31	62.39	9	0	1.56258	1.63784	1.59563	1.20943	1.38186	1.68764	1.565	1.27507	1.36708
P62258	YWHAE	1.01648	0.205246	0.623381	0.818147	0.0235883			0.531242			14-3-3 protein epsilon OS=Homo sapiens OX=9606 GN=YWHAE PE=1 SV=1	0	35.75	33	8	143	7	255	29.2	4.74	82.3	8	0	2.75147	2.64484	2.67194	2.76896	2.79803	2.97298	2.72438	2.62006	2.65305
Q9BVQ7	AFG2B	0.920456	0.536367	0.290826	0.514325	-0.119579			-1.21603		SPATA5L1	ATPase family gene 2 protein homolog B OS=Homo sapiens OX=9606 GN=AFG2B PE=1 SV=2	0	35.713	16	9	123	9	753	80.7	8.09	44.28	9	0	-0.729389	-0.587356	-0.622446	0.440515	0.445843	-0.589723	-0.415283	-0.463396	-0.701775
Q03468	ERCC6	1.59481	0.938715	0.115156	0.262031	0.673382			2.00728		CSB	DNA excision repair protein ERCC-6 OS=Homo sapiens OX=9606 GN=ERCC6 PE=1 SV=1	0	35.71	7	10	123	10	1493	168.3	8.09	39.94	10	0	0.28027	-0.0837732	-0.501736	-0.0650781	-1.20672	-0.0461284	-0.516675	-1.27096	-0.537754
Q969Q0	RPL36AL	1.21387	0.542651	0.286648	0.509452	0.279611			1.22835			Ribosomal protein eL42-like OS=Homo sapiens OX=9606 GN=RPL36AL PE=1 SV=3	0	35.677	41	7	166	2	106	12.5	10.65	91.2	7	0	0.955116	0.604957	0.784771	0.883817	0.450205	0.10847	0.852052	0.145629	0.508332
Q13151	HNRNPA0	0.847874	1.0218	0.095105	0.228709	-0.238078			-2.1766		HNRPA0	Heterogeneous nuclear ribonucleoprotein A0 OS=Homo sapiens OX=9606 GN=HNRNPA0 PE=1 SV=1	0	35.618	34	8	166	8	305	30.8	9.29	82.94	8	0	2.16409	2.07933	2.28159	2.3575	2.43449	2.33099	2.55653	2.44206	2.24065
P40222	TXLNA	1.08245	0.198758	0.632765	0.825966	0.114302			0.516473		TXLN	Alpha-taxilin OS=Homo sapiens OX=9606 GN=TXLNA PE=1 SV=3	0	35.613	16	7	141	6	546	61.9	6.52	60.64	7	0	0.849606	0.894447	1.14446	0.804319	0.757859	0.876171	1.10679	0.45169	0.987132
P49642	PRIM1	0.363753	2.1414	0.00722098	0.0890299	-1.45897			-5.05199	+		DNA primase small subunit OS=Homo sapiens OX=9606 GN=PRIM1 PE=1 SV=1	0	35.547	27	9	79	9	420	49.9	8.21	25.15	9	0	2.77356	2.46709	3.38263	2.86649	3.07548	2.73161	4.23568	4.54304	4.22146
Q13206	DDX10	1.8129	0.701442	0.198865	0.390033	0.858298			1.53803			Probable ATP-dependent RNA helicase DDX10 OS=Homo sapiens OX=9606 GN=DDX10 PE=1 SV=2	0	35.521	12	10	97	10	875	100.8	8.63	31.26	10	0	-0.59575	-0.284347	-0.402502	-1.19002	-0.519177	-0.812013	-0.288066	-2.18832	-1.38111
Q6P1J9	CDC73	0.786612	1.13557	0.0731868	0.192525	-0.346276			-2.41463		C1orf28 HRPT2	Parafibromin OS=Homo sapiens OX=9606 GN=CDC73 PE=1 SV=1	0	35.517	19	9	106	9	531	60.5	9.61	34.19	9	0	0.633861	0.778217	0.506646	0.0893525	0.265091	0.351347	0.779984	1.19578	0.981785
Q29RF7	PDS5A	0.500199	0.697681	0.200594	0.393179	-0.999425			-1.53069		KIAA0648 PDS5	Sister chromatid cohesion protein PDS5 homolog A OS=Homo sapiens OX=9606 GN=PDS5A PE=1 SV=1	0	35.449	12	11	44	11	1337	150.7	7.91	11.67	11	0	-1.07122	-2.40023	-3.18334	-0.88598	-2.50895	-5.98593	-1.5471	-1.29557	-0.813845
O00299	CLIC1	1.2086	1.15414	0.0701224	0.187967	0.273342			2.45427		G6 NCC27	Chloride intracellular channel protein 1 OS=Homo sapiens OX=9606 GN=CLIC1 PE=1 SV=4	0	35.258	53	8	145	8	241	26.9	5.17	72.47	8	0	1.84959	2.04095	1.7606	1.94484	2.06688	2.10377	1.70271	1.46273	1.66567
Q7Z333	SETX	1.70005	0.851932	0.140627	0.301228	0.765581			1.83367		ALS4 KIAA0625 SCAR1	Probable helicase senataxin OS=Homo sapiens OX=9606 GN=SETX PE=1 SV=4	0	35.233	5	12	85	12	2677	302.7	7.17	22.5	12	0	-1.45824	-2.48203	-1.51055	-1.85848	-1.4891	-1.95808	-2.20129	-2.48766	-3.05862
O15541	RNF113A	0.462752	1.75145	0.0177236	0.106255	-1.11169			-3.8878	+	RNF113 ZNF183	E3 ubiquitin-protein ligase RNF113A OS=Homo sapiens OX=9606 GN=RNF113A PE=1 SV=1	0	35.214	36	8	110	8	343	38.8	5.69	42.38	8	0	0.6945	0.629382	0.609052	-1.79124	-0.400651	-1.14094	1.54115	2.32024	1.40661
Q96P11	NSUN5	1.17738	0.316567	0.482429	0.703637	0.235582			0.773442		NSUN5A WBSCR20 WBSCR20A	28S rRNA (cytosine-C(5))-methyltransferase OS=Homo sapiens OX=9606 GN=NSUN5 PE=1 SV=2	0	35.206	24	9	71	9	429	46.7	8.62	28.32	9	0	-0.552631	0.22185	-0.197094	-2.78308	-3.0292	-1.57423	-0.088412	-0.350116	-0.796093
Q14126	DSG2	1.56029	0.724279	0.188678	0.376723	0.641811			1.5826		CDHF5	Desmoglein-2 OS=Homo sapiens OX=9606 GN=DSG2 PE=1 SV=2	0	35.191	11	8	162	8	1118	122.2	5.24	70.63	8	0	2.19868	2.10384	1.91306	2.54642	2.64091	2.73077	2.1001	0.726916	1.46313
Q6IAN0	DHRS7B	1.12737	0.402569	0.395759	0.628078	0.172964			0.950329		SDR32C1	Dehydrogenase/reductase SDR family member 7B OS=Homo sapiens OX=9606 GN=DHRS7B PE=1 SV=2	0	35.18	27	8	58	8	325	35.1	9.55	18.35	8	0	-0.214908	-0.047579	-0.128095	-0.308211	-0.925433	-0.555582	0	-0.607856	-0.301619
Q13043	STK4	0.827876	0.83093	0.147594	0.313887	-0.272513			-1.79207		KRS2 MST1	Serine/threonine-protein kinase 4 OS=Homo sapiens OX=9606 GN=STK4 PE=1 SV=2	0	35.121	17	8	122	8	487	55.6	5.07	49.86	8	0	1.5321	1.51046	1.66789	1.42602	1.45672	1.55826	1.84526	2.09054	1.5922
Q9Y6M4	CSNK1G3	1.10238	0.248611	0.564142	0.770353	0.140618			0.627887			Casein kinase I isoform gamma-3 OS=Homo sapiens OX=9606 GN=CSNK1G3 PE=1 SV=2	0	35.038	21	9	153	2	447	51.4	9.22	61.83	9	3	1.46583	1.14767	1.29064	1.48294	1.33495	1.63696	1.46502	0.772744	1.24453
Q13243	SRSF5	1.28386	1.80292	0.0157428	0.106247	0.360486			4.02929		HRS SFRS5 SRP40	Serine/arginine-rich splicing factor 5 OS=Homo sapiens OX=9606 GN=SRSF5 PE=1 SV=1	0	35.036	28	9	209	8	272	31.2	11.59	84.07	9	0	2.73279	2.48807	2.64995	2.22397	2.28955	2.21692	2.36967	2.20746	2.21222
Q92541	RTF1	0.968289	0.243914	0.570277	0.777614	-0.0464902			-0.617578		KIAA0252	RNA polymerase-associated protein RTF1 homolog OS=Homo sapiens OX=9606 GN=RTF1 PE=1 SV=4	0	35.033	14	9	113	9	710	80.3	8.15	33.63	9	0	-0.561972	-0.562534	-0.419325	0.0093988	-0.258353	-0.12031	-0.505609	-0.353789	-0.544962
Q96SZ6	CDK5RAP1	1.02848	0.27627	0.529335	0.740987	0.040513			0.687892		C20orf34	Mitochondrial tRNA methylthiotransferase CDK5RAP1 OS=Homo sapiens OX=9606 GN=CDK5RAP1 PE=1 SV=2	0	35.011	16	8	96	8	601	67.6	8.21	32.76	8	0	0.00968933	0.148515	-0.0334725	-0.241012	-0.70863	-0.30815	0.00702062	0.0346452	-0.0384731
Q13242	SRSF9	0.93179	0.41654	0.383231	0.614039	-0.101923			-0.978501		SFRS9 SRP30C	Serine/arginine-rich splicing factor 9 OS=Homo sapiens OX=9606 GN=SRSF9 PE=1 SV=1	0	34.998	41	9	194	8	221	25.5	8.65	102.85	9	0	3.48556	3.40115	3.58482	3.73668	3.61163	3.73037	3.73714	3.61168	3.42847
Q9UII4	HERC5	1.33418	1.83169	0.0147335	0.104544	0.415956			4.10989		CEB1 CEBP1	E3 ISG15--protein ligase HERC5 OS=Homo sapiens OX=9606 GN=HERC5 PE=1 SV=2	0	34.927	15	11	98	11	1024	116.8	7.65	27.2	11	0	-0.190306	-0.123273	-0.0570494	-0.469198	-0.61279	-0.818394	-0.723901	-0.47535	-0.419245
O00303	EIF3F	1.7615	2.69715	0.0020084	0.0735484	0.816802			7.16519	+	EIF3S5	Eukaryotic translation initiation factor 3 subunit F OS=Homo sapiens OX=9606 GN=EIF3F PE=1 SV=1	0	34.884	32	8	174	8	357	37.5	5.45	86.45	8	0	2.76122	2.52161	2.90015	2.96853	3.26912	2.85707	1.86573	1.96152	1.90532
Q5TC82	RC3H1	0.723825	0.479255	0.331699	0.567062	-0.466288			-1.10358		KIAA2025 RNF198	Roquin-1 OS=Homo sapiens OX=9606 GN=RC3H1 PE=1 SV=1	0	34.869	13	8	61	7	1133	125.7	7.27	18.75	8	0	-0.277963	0.0722205	0.405726	-4.22904	-1.2115	-0.598136	0.135343	1.27959	0.183914
P62244	RPS15A	1.13312	0.528669	0.296027	0.522199	0.180306			1.20093			Small ribosomal subunit protein uS8 OS=Homo sapiens OX=9606 GN=RPS15A PE=1 SV=2	0	34.798	40	7	494	7	130	14.8	10.13	209.22	7	0	6.03805	6.04906	5.87168	5.66732	5.42333	5.75135	6.01838	5.54514	5.85436
P25490	YY1	1.69698	0.638983	0.229624	0.430507	0.762973			1.41633		INO80S	Transcriptional repressor protein YY1 OS=Homo sapiens OX=9606 GN=YY1 PE=1 SV=2	0	34.732	25	9	107	9	414	44.7	6.25	37.68	9	0	-0.658903	0.0775316	-0.158	-0.232672	-0.50701	-0.146723	-0.474511	-1.99419	-0.559586
Q53H12	AGK	1.0421	0.0408504	0.910227	0.957851	0.0594915			0.120057		MULK	Acylglycerol kinase, mitochondrial OS=Homo sapiens OX=9606 GN=AGK PE=1 SV=2	0	34.716	33	9	116	9	422	47.1	8.09	59.59	9	0	2.05533	2.05953	1.5354	1.3598	-0.15141	1.89819	1.14674	2.71194	1.6131
P54920	NAPA	0.970255	0.0828113	0.826397	0.921238	-0.0435639			-0.234106		SNAPA	Alpha-soluble NSF attachment protein OS=Homo sapiens OX=9606 GN=NAPA PE=1 SV=3	0	34.624	38	7	91	7	295	33.2	5.36	32.11	7	0	0.607966	0.620645	0.369322	0.495924	0.583467	0.692806	0.763031	0.242669	0.722925
Q9UJV9	DDX41	1.52351	2.54643	0.00284166	0.0868642	0.607397			6.52961	+	ABS	Probable ATP-dependent RNA helicase DDX41 OS=Homo sapiens OX=9606 GN=DDX41 PE=1 SV=2	0	34.571	18	9	126	9	622	69.8	6.84	45.76	9	0	1.28384	1.17803	1.26751	1.50205	1.56447	1.4887	0.77133	0.473461	0.662391
Q9UNM6	PSMD13	1.20174	1.19823	0.0633536	0.17563	0.265121			2.54928			26S proteasome non-ATPase regulatory subunit 13 OS=Homo sapiens OX=9606 GN=PSMD13 PE=1 SV=2	0	34.552	28	9	95	9	376	42.9	5.81	39.85	9	0	1.03151	1.26622	1.1545	1.00818	1.34741	1.13285	0.762772	1.03275	0.861341
P39656	DDOST	1.0982	0.637232	0.230551	0.43056	0.135144			1.41292		KIAA0115 OST48	Dolichyl-diphosphooligosaccharide--protein glycosyltransferase 48 kDa subunit OS=Homo sapiens OX=9606 GN=DDOST PE=1 SV=4	0	34.532	24	8	177	8	456	50.8	6.55	81.83	8	0	2.3556	2.53956	2.45195	2.87588	3.02873	2.98648	2.16114	2.35181	2.42873
P62910	RPL32	1.22246	0.37939	0.417455	0.648995	0.289788			0.903283			Large ribosomal subunit protein eL32 OS=Homo sapiens OX=9606 GN=RPL32 PE=1 SV=2	0	34.53	47	8	288	8	135	15.9	11.33	140.99	8	0	5.15934	4.97519	5.00975	4.90065	4.64822	4.90641	5.15267	4.13387	4.98838
P50416	CPT1A	1.11858	0.60168	0.250219	0.457654	0.161672			1.34366		CPT1	Carnitine O-palmitoyltransferase 1, liver isoform OS=Homo sapiens OX=9606 GN=CPT1A PE=1 SV=2	0	34.528	13	9	131	9	773	88.3	8.65	52.68	9	0	1.01943	0.882069	1.07667	0.430347	0.383337	0.537544	0.961365	0.622045	0.909751
Q99848	EBNA1BP2	1.26325	1.21605	0.0608063	0.172345	0.337135			2.58809		EBP2	Probable rRNA-processing protein EBP2 OS=Homo sapiens OX=9606 GN=EBNA1BP2 PE=1 SV=2	0	34.43	28	7	113	7	306	34.8	10.1	44.06	7	0	2.01003	1.70213	1.74969	1.6444	1.52751	1.75777	1.54499	1.30921	1.59625
Q12797	ASPH	0.956133	0.0818244	0.828277	0.92242	-0.0647174			-0.231513		BAH	Aspartyl/asparaginyl beta-hydroxylase OS=Homo sapiens OX=9606 GN=ASPH PE=1 SV=3	0	34.4	14	10	172	10	758	85.8	5.01	88.09	10	0	1.04674	1.66924	1.63933	1.38047	1.53794	1.3639	1.79035	1.14521	1.61391
Q9UHX1	PUF60	1.17328	1.15128	0.070586	0.188952	0.230543			2.44815		FIR ROBPI SIAHBP1	Poly(U)-binding-splicing factor PUF60 OS=Homo sapiens OX=9606 GN=PUF60 PE=1 SV=1	0	34.354	21	9	135	9	559	59.8	5.29	55.95	9	0	2.128	1.90301	2.09293	1.74389	1.92679	1.64497	1.83017	1.90909	1.69305
Q99700	ATXN2	0.973076	0.144894	0.716318	0.868432	-0.0393756			-0.390139		ATX2 SCA2 TNRC13	Ataxin-2 OS=Homo sapiens OX=9606 GN=ATXN2 PE=1 SV=2	0	34.287	9	9	134	9	1313	140.2	9.57	41.16	9	0	0.119022	-0.0347498	0.197723	-0.480156	-1.55588	-0.539359	0.249665	0.155451	-0.00499344
O95373	IPO7	1.17777	0.729308	0.186506	0.373968	0.236056			1.59243		RANBP7	Importin-7 OS=Homo sapiens OX=9606 GN=IPO7 PE=1 SV=1	0	34.226	9	7	198	7	1038	119.4	4.82	96.04	7	0	3.12674	2.97215	2.83051	3.21111	3.28503	3.339	2.89447	2.50161	2.82516
Q04864	REL	0.388256	2.1719	0.00673124	0.0876923	-1.36492			-5.15284	+		Proto-oncogene c-Rel OS=Homo sapiens OX=9606 GN=REL PE=1 SV=1	0	34.191	21	10	83	10	619	68.5	5.86	29.63	10	0	-0.696099	-1.00574	-0.809481	-0.869199	-0.839823	-1.1209	0.152323	0.998768	0.432344
Q7Z3C6	ATG9A	0.96488	0.0635721	0.863829	0.938384	-0.0515778			-0.182823		APG9L1	Autophagy-related protein 9A OS=Homo sapiens OX=9606 GN=ATG9A PE=1 SV=3	0	34.173	13	7	76	7	839	94.4	6.67	20.44	7	0	-0.871087	-0.589214	-0.716003	-0.156678	-0.0197675	0.262059	-1.16951	-0.612014	-0.240047
P16871	IL7R	1.4341	0.454382	0.351252	0.588364	0.520149			1.05421			Interleukin-7 receptor subunit alpha OS=Homo sapiens OX=9606 GN=IL7R PE=1 SV=3	0	34.167	27	8	97	8	459	51.5	5.44	34.65	8	0	-0.209172	-0.0199204	0.410483	-0.18306	-0.197066	-0.236519	0.45552	-0.953215	-0.881363
Q96T51	RUFY1	1.02741	0.15785	0.695265	0.857111	0.0390102			0.421188		RABIP4 ZFYVE12	RUN and FYVE domain-containing protein 1 OS=Homo sapiens OX=9606 GN=RUFY1 PE=1 SV=2	0	34.143	15	9	98	8	708	79.8	5.74	39.08	9	1	-0.0264622	0.152945	0.28821	0.148384	0.569767	0.625021	0.0773813	0.131596	0.088685
P61353	RPL27	1.23433	0.550863	0.281279	0.502496	0.303729			1.24443			Large ribosomal subunit protein eL27 OS=Homo sapiens OX=9606 GN=RPL27 PE=1 SV=2	0	34.137	43	5	111	5	136	15.8	10.56	54.4	5	0	3.28514	3.05675	2.87692	2.98688	2.74494	2.8508	3.08304	2.36132	2.86327
P08134	RHOC	4.31142	0.951497	0.111816	0.256305	2.10816			2.03311		ARH9 ARHC	Rho-related GTP-binding protein RhoC OS=Homo sapiens OX=9606 GN=RHOC PE=1 SV=1	0	34.104	35	6	166	1	193	22	6.58	64.26	6	0	-0.163238	-0.22328	-0.215491	-0.652737	0.343513	-1.82326	-4.37723	-1.40033	-1.14894
Q9NVN8	GNL3L	1.15799	0.441007	0.362237	0.600621	0.211625			1.02755			Guanine nucleotide-binding protein-like 3-like protein OS=Homo sapiens OX=9606 GN=GNL3L PE=1 SV=1	0	34.104	19	8	143	8	582	65.5	8.44	60.34	8	0	1.50361	1.30569	1.24026	0.845888	0.680654	0.827802	1.42308	0.777647	1.21397
O60832	DKC1	1.40109	1.88765	0.0129525	0.10076	0.486548			4.26977		NOLA4	H/ACA ribonucleoprotein complex subunit DKC1 OS=Homo sapiens OX=9606 GN=DKC1 PE=1 SV=3	0	34.097	19	7	72	7	514	57.6	9.42	16.88	7	0	-0.586548	-0.703626	-0.633924	-1.38467	-0.875185	-1.10783	-0.913526	-1.20325	-1.26697
P57764	GSDMD	0.910351	0.278848	0.526202	0.738394	-0.135505			-0.693429		DFNA5L GSDMDC1	Gasdermin-D OS=Homo sapiens OX=9606 GN=GSDMD PE=1 SV=1	0	34	24	8	96	8	484	52.8	5.08	42.18	8	0	0.950727	0.976448	0.654869	0.965444	0.818716	1.16651	0.907205	0.763755	1.3176
Q96A49	SYAP1	0.778682	1.15051	0.0707123	0.189383	-0.360894			-2.44649			Synapse-associated protein 1 OS=Homo sapiens OX=9606 GN=SYAP1 PE=1 SV=1	0	33.996	32	7	80	7	352	39.9	4.53	23.1	7	0	-0.449897	-0.244228	-0.632063	-0.443735	-0.309445	-0.194345	-0.0329388	0.0556128	-0.26618
Q9BV44	THUMPD3	0.865733	0.813109	0.153777	0.323508	-0.208005			-1.75687			tRNA (guanine(6)-N2)-methyltransferase THUMP3 OS=Homo sapiens OX=9606 GN=THUMPD3 PE=1 SV=1	0	33.99	24	10	80	10	507	57	6.37	31.67	10	0	-0.208964	-0.499828	-0.199165	-0.263849	-0.24899	-0.397189	-0.223313	-0.0516076	-0.00902176
O00469	PLOD2	1.22338	1.38251	0.0414472	0.143309	0.290867			2.9626			Procollagen-lysine,2-oxoglutarate 5-dioxygenase 2 OS=Homo sapiens OX=9606 GN=PLOD2 PE=1 SV=2	0	33.965	14	8	120	8	737	84.6	6.71	52.11	8	0	0.668755	0.7445	0.423294	1.03161	0.987709	1.11423	0.351364	0.31313	0.299455
P09884	POLA1	1.114	0.105295	0.784702	0.896055	0.155754			0.292145		POLA	DNA polymerase alpha catalytic subunit OS=Homo sapiens OX=9606 GN=POLA1 PE=1 SV=2	0	33.964	9	11	104	11	1462	165.8	5.85	33.78	11	0	-0.837755	-0.9174	-0.137528	-3.37772	-3.34587	-3.94512	-1.62708	0.00615501	-0.739016
Q96SI9	STRBP	0.845251	0.576479	0.265168	0.477718	-0.242549			-1.2945		SPNR	Spermatid perinuclear RNA-binding protein OS=Homo sapiens OX=9606 GN=STRBP PE=1 SV=1	0	33.954	8	6	171	3	672	73.6	8.72	65.35	6	0	0.0661259	0.511017	0.505407	0.504471	0.501273	-0.0664964	0.482015	0.834728	0.493454
Q8NBJ5	COLGALT1	1.07005	0.612505	0.244059	0.448159	0.0976829			1.36475		GLT25D1	Procollagen galactosyltransferase 1 OS=Homo sapiens OX=9606 GN=COLGALT1 PE=1 SV=1	0	33.935	16	9	137	9	622	71.6	7.31	56.3	9	0	0.919052	1.01354	0.955717	1.98776	1.98194	2.09932	0.738407	0.895807	0.961046
Q8NF37	LPCAT1	1.02119	0.11529	0.766848	0.889673	0.0302457			0.317356		AYTL2 PFAAP3	Lysophosphatidylcholine acyltransferase 1 OS=Homo sapiens OX=9606 GN=LPCAT1 PE=1 SV=2	0	33.912	17	8	152	8	534	59.1	6.02	56.61	8	0	0.974007	0.696212	0.966773	1.14494	1.02989	1.15242	0.9012	0.833258	0.811796
Q8NBS9	TXNDC5	1.35841	0.60555	0.247999	0.454417	0.441917			1.3512		TLP46	Thioredoxin domain-containing protein 5 OS=Homo sapiens OX=9606 GN=TXNDC5 PE=1 SV=2	0	33.899	25	8	91	8	432	47.6	5.97	39.72	8	0	0.164661	0.537052	-0.481085	1.12868	1.08559	1.42623	-0.285339	-0.634271	-0.185512
Q99733	NAP1L4	1.76316	3.43427	0.000367897	0.102857	0.818165			11.1526	+	NAP2	Nucleosome assembly protein 1-like 4 OS=Homo sapiens OX=9606 GN=NAP1L4 PE=1 SV=1	0	33.854	21	7	156	5	375	42.8	4.69	74.53	7	1	0.689177	0.586159	0.73524	1.3885	0.735781	1.14264	-0.234501	-0.0361258	-0.173292
Q9Y6N5	SQOR	0.855878	0.305344	0.495058	0.712054	-0.224523			-0.749818		SQRDL	Sulfide:quinone oxidoreductase, mitochondrial OS=Homo sapiens OX=9606 GN=SQOR PE=1 SV=1	0	33.841	21	8	123	8	450	49.9	9.11	45	8	0	5.88538	5.54787	6.22489	5.66999	6.18902	6.42061	6.30317	5.65849	6.37004
Q16204	CCDC6	0.564638	2.01925	0.00956647	0.109875	-0.824602			-4.66323	+	D10S170 TST1	Coiled-coil domain-containing protein 6 OS=Homo sapiens OX=9606 GN=CCDC6 PE=1 SV=2	0	33.835	22	8	85	8	474	53.3	7.34	38.66	8	0	-0.248746	-0.210466	0.189265	0.427015	0.703935	0.598826	0.628291	0.950503	0.625066
Q01085	TIAL1	0.688449	1.07761	0.0836349	0.209448	-0.538578			-2.29241			Nucleolysin TIAR OS=Homo sapiens OX=9606 GN=TIAL1 PE=1 SV=1	0	33.828	22	6	171	4	375	41.6	7.74	83.21	6	2	1.13452	1.32237	1.76213	0.192337	0.770537	1.00428	1.82843	2.23043	1.7759
P30041	PRDX6	1.03229	0.165983	0.682366	0.85132	0.0458509			0.440451		AOP2 KIAA0106	Peroxiredoxin-6 OS=Homo sapiens OX=9606 GN=PRDX6 PE=1 SV=3	0	33.796	37	8	160	8	224	25	6.38	70.33	8	0	1.64326	1.82229	1.80368	1.78645	2.22488	2.18032	1.69143	1.56997	1.87028
Q8NCA5	FAM98A	0.829335	0.444515	0.359323	0.596487	-0.269973			-1.03455			Protein FAM98A OS=Homo sapiens OX=9606 GN=FAM98A PE=1 SV=2	0	33.772	19	7	140	7	518	55.2	8.95	62.63	7	0	1.15834	0.629038	0.885155	0.632194	0.954984	0.759914	0.982237	1.58224	0.917977
P21580	TNFAIP3	0.791721	1.66345	0.0217043	0.111946	-0.336936			-3.6535		OTUD7C	Tumor necrosis factor alpha-induced protein 3 OS=Homo sapiens OX=9606 GN=TNFAIP3 PE=1 SV=1	0	33.771	15	10	94	10	790	89.6	8.22	41.91	10	0	-0.093786	0.0657797	-0.235627	0.291452	-0.0712729	0.425625	0.266617	0.290737	0.189819
Q13895	BYSL	0.785946	1.36334	0.0433169	0.145307	-0.347498			-2.9183		ENP1	Bystin OS=Homo sapiens OX=9606 GN=BYSL PE=1 SV=3	0	33.738	22	8	59	8	437	49.6	8.12	19.25	8	0	-0.569106	-0.363558	-0.308083	-1.31022	-1.30102	-1.4889	0.0933039	-0.0781515	-0.213406
P48735	IDH2	1.12363	0.450393	0.354492	0.593315	0.16817			1.04627			Isocitrate dehydrogenase [NADP], mitochondrial OS=Homo sapiens OX=9606 GN=IDH2 PE=1 SV=2	0	33.688	22	9	76	8	452	50.9	8.69	26.04	9	1	0.894732	0.815167	0.67722	1.21524	1.3211	1.2071	0.870301	0.360578	0.651728
O60684	KPNA6	2.70645	0.487998	0.325089	0.558298	1.4364			1.12087		IPOA7	Importin subunit alpha-7 OS=Homo sapiens OX=9606 GN=KPNA6 PE=1 SV=1	0	33.678	19	8	192	5	536	60	4.98	83.11	8	0	0.718529	0.625476	0.171172	-0.167146	0.4733	-0.218952	0.299552	-3.47154	0.377965
Q14147	DHX34	1.56089	0.365099	0.43142	0.658224	0.642366			0.874067		DDX34 KIAA0134	Probable ATP-dependent RNA helicase DHX34 OS=Homo sapiens OX=9606 GN=DHX34 PE=1 SV=2	0	33.655	14	10	81	10	1143	128	7.56	20.48	10	0	-1.80936	-1.40106	-1.1642	-2.49833	-1.99008	-3.19376	-3.37317	-2.01124	-0.917313
Q9NQX7	ITM2C	1.17329	0.385164	0.411942	0.642328	0.230563			0.91504		BRI3	Integral membrane protein 2C OS=Homo sapiens OX=9606 GN=ITM2C PE=1 SV=1	0	33.637	30	7	94	7	267	30.2	8	39.33	7	0	1.67159	1.71587	1.48622	2.44224	2.60659	2.62712	1.60245	0.911574	1.66797
Q9H9B4	SFXN1	0.976703	0.159012	0.693407	0.856563	-0.0340081			-0.42395			Sideroflexin-1 OS=Homo sapiens OX=9606 GN=SFXN1 PE=1 SV=4	0	33.582	28	8	240	8	322	35.6	9.07	114.09	8	0	2.45105	2.42255	2.33705	2.94139	2.72917	2.81476	2.56849	2.31799	2.4262
Q9Y2T2	AP3M1	1.15485	0.954556	0.111031	0.25455	0.207711			2.03931			AP-3 complex subunit mu-1 OS=Homo sapiens OX=9606 GN=AP3M1 PE=1 SV=1	0	33.573	32	9	124	8	418	46.9	6.93	59.58	9	0	0.573788	0.452948	0.423602	0.318632	0.308325	0.265457	0.455356	0.210175	0.161672
Q6NYC1	JMJD6	2.43144	1.69169	0.0203381	0.108441	1.28181			3.72767	+	KIAA0585 PSR PTDSR	Bifunctional arginine demethylase and lysyl-hydroxylase JMJD6 OS=Homo sapiens OX=9606 GN=JMJD6 PE=1 SV=1	0	33.417	27	7	111	7	403	46.4	8.69	36.92	7	0	0.614855	0.289621	0.831953	0.848137	0.42862	0.867506	-0.193836	-1.25047	-0.66469
Q9H078	CLPB	2.58514	0.962683	0.108973	0.249766	1.37024			2.05578		SKD3	Mitochondrial disaggregase OS=Homo sapiens OX=9606 GN=CLPB PE=1 SV=1	0	33.413	19	8	100	8	707	78.7	9.01	32.22	8	0	1.9235	1.79416	1.13162	1.70103	1.29095	1.38019	0.847313	-0.993168	0.884395
O15460	P4HA2	0.635466	1.30881	0.0491121	0.160343	-0.654113			-2.79398			Prolyl 4-hydroxylase subunit alpha-2 OS=Homo sapiens OX=9606 GN=P4HA2 PE=1 SV=1	0	33.321	20	7	65	7	535	60.9	5.71	21.84	7	0	-0.919574	-1.40891	-0.765407	-0.0182715	0.639783	0.0572327	-0.521713	-0.115509	-0.494333
O15143	ARPC1B	1.3055	0.994819	0.1012	0.238217	0.384602			2.12125		ARC41	Actin-related protein 2/3 complex subunit 1B OS=Homo sapiens OX=9606 GN=ARPC1B PE=1 SV=3	0	33.315	30	7	85	7	372	40.9	8.35	28.74	7	0	0.487589	1.04548	0.80948	0.998001	1.1322	1.17981	0.335542	0.294581	0.558622
P08240	SRPRA	1.28297	0.839455	0.144726	0.310172	0.359485			1.80894		SRPR	Signal recognition particle receptor subunit alpha OS=Homo sapiens OX=9606 GN=SRPRA PE=1 SV=2	0	33.312	16	9	92	9	638	69.8	8.95	38.21	9	0	0.916237	1.27193	0.878242	-2.40211	-2.48414	-1.81889	0.915136	0.383092	0.689729
Q7L2H7	EIF3M	2.96326	2.79721	0.0015951	0.077	1.56719			7.61655	+	HFLB5 PCID1	Eukaryotic translation initiation factor 3 subunit M OS=Homo sapiens OX=9606 GN=EIF3M PE=1 SV=1	0	33.291	22	8	105	8	374	42.5	5.63	43.06	8	0	1.66671	1.22288	1.69141	1.92918	2.28949	2.02864	0.0670494	-0.31486	0.127254
P84098	RPL19	1.15786	0.317226	0.481697	0.703867	0.211465			0.774825			Large ribosomal subunit protein eL19 OS=Homo sapiens OX=9606 GN=RPL19 PE=1 SV=1	0	33.287	28	6	185	6	196	23.5	11.47	86.2	6	0	2.92747	2.74207	2.70929	2.36414	2.31838	2.43906	2.98169	2.08223	2.68053
Q9ULX6	AKAP8L	0.899742	0.661221	0.218162	0.417393	-0.152417			-1.45964		NAKAP NAKAP95	A-kinase anchor protein 8-like OS=Homo sapiens OX=9606 GN=AKAP8L PE=1 SV=4	0	33.261	13	7	139	7	646	71.6	5.05	65.93	7	0	3.13862	3.13228	3.28529	3.43635	3.15582	3.3037	3.34159	3.49469	3.17716
Q00325	SLC25A3	0.89307	1.24199	0.0572808	0.169593	-0.163154			-2.64499		PHC	Solute carrier family 25 member 3 OS=Homo sapiens OX=9606 GN=SLC25A3 PE=1 SV=2	0	33.238	20	9	194	9	362	40.1	9.38	79.34	9	0	3.68519	3.69437	3.82023	3.37379	3.82001	3.7836	3.85735	3.8483	3.9836
Q15046	KARS1	1.02219	0.0346221	0.923374	0.962962	0.0316687			0.10239		KARS KIAA0070	Lysine--tRNA ligase OS=Homo sapiens OX=9606 GN=KARS1 PE=1 SV=3	0	33.236	17	10	147	10	597	68	6.35	60.79	10	0	0.415379	0.593647	0.628405	0.146327	-0.0201199	0.0757709	1.01115	-0.0321278	0.563404
Q9H0S4	DDX47	1.13944	0.875168	0.133301	0.288241	0.188324			1.87987			Probable ATP-dependent RNA helicase DDX47 OS=Homo sapiens OX=9606 GN=DDX47 PE=1 SV=1	0	33.222	20	8	151	8	455	50.6	9.1	70.31	8	0	2.55115	2.37089	2.51389	1.44769	1.69311	1.17068	2.45085	2.16851	2.2516
Q04917	YWHAH	1.05912	0.174312	0.669403	0.84487	0.0828715			0.46001		YWHA1	14-3-3 protein eta OS=Homo sapiens OX=9606 GN=YWHAH PE=1 SV=4	0	33.181	48	8	100	6	246	28.2	4.84	53.14	8	0	0.150419	0.179676	-0.0909468	0.40478	0.366219	0.263289	0.311836	-0.190496	-0.130806
P84103	SRSF3	1.09029	0.520244	0.301826	0.530907	0.124716			1.18439		SFRS3 SRP20	Serine/arginine-rich splicing factor 3 OS=Homo sapiens OX=9606 GN=SRSF3 PE=1 SV=1	0	33.18	43	6	392	6	164	19.3	11.65	202.63	6	0	4.56868	4.44355	4.69361	4.74692	4.50971	4.68844	4.57927	4.43856	4.31386
Q9H5Z1	DHX35	1.84409	0.813967	0.153473	0.323338	0.882905			1.75857		C20orf15 DDX35	Probable ATP-dependent RNA helicase DHX35 OS=Homo sapiens OX=9606 GN=DHX35 PE=1 SV=2	0	33.177	17	9	68	9	703	78.9	8.59	20.47	9	0	-0.81584	-1.16826	-1.23939	-1.23068	-1.62092	-1.69218	-2.15059	-1.03815	-2.68346
P31947	SFN	2.12075	1.16091	0.0690388	0.187259	1.08457			2.46876		HME1	14-3-3 protein sigma OS=Homo sapiens OX=9606 GN=SFN PE=1 SV=1	0	33.166	41	8	98	7	248	27.8	4.74	42.53	8	0	-0.170591	-0.01584	-0.207164	-1.06575	-1.53008	-0.104152	-2.02289	-1.09524	-0.529181
P04150	NR3C1	1.03462	0.112445	0.77189	0.890256	0.0490993			0.310213		GRL	Glucocorticoid receptor OS=Homo sapiens OX=9606 GN=NR3C1 PE=1 SV=1	0	33.157	14	8	92	8	777	85.6	6.38	28.88	8	0	-0.480926	-0.480342	-0.920061	-0.816371	-0.736119	-2.59445	-0.627297	-0.795502	-0.605827
O00116	AGPS	1.08364	0.4414	0.361909	0.601124	0.115881			1.02833			Alkyldihydroxyacetonephosphate synthase, peroxisomal OS=Homo sapiens OX=9606 GN=AGPS PE=1 SV=1	0	33.107	20	9	94	9	658	72.9	7.34	32.03	9	0	-1.01421	-0.708424	-0.742429	-1.23852	-1.01296	-1.21766	-1.01982	-0.966686	-0.826195
P26196	DDX6	1.52696	1.54275	0.0286584	0.117062	0.610658			3.34663		HLR2 RCK	Probable ATP-dependent RNA helicase DDX6 OS=Homo sapiens OX=9606 GN=DDX6 PE=1 SV=2	0	33.105	23	9	143	9	483	54.4	8.66	59	9	0	0.814568	0.939659	0.785068	0.779316	-0.0987425	0.454292	0.338243	-0.107478	0.476556
Q9BQ67	GRWD1	0.981711	0.078395	0.834843	0.923945	-0.0266303			-0.222473		GRWD KIAA1942 WDR28	Glutamate-rich WD repeat-containing protein 1 OS=Homo sapiens OX=9606 GN=GRWD1 PE=1 SV=1	0	33.095	20	7	144	7	446	49.4	4.92	56.85	7	0	1.26973	0.883102	0.954144	0.79601	0.947948	0.876534	1.07395	1.03344	1.07948
P48047	ATP5PO	0.846086	0.20458	0.624338	0.817747	-0.241124			-0.529729		ATP5O ATPO	ATP synthase subunit O, mitochondrial OS=Homo sapiens OX=9606 GN=ATP5PO PE=1 SV=1	0	33.09	45	7	190	7	213	23.3	9.96	86.28	7	0	2.40818	2.78259	2.4373	2.10204	2.20316	2.3949	3.66012	2.29811	2.3932
P14866	HNRNPL	0.949285	0.480126	0.331035	0.566907	-0.0750875			-1.1053		HNRPL	Heterogeneous nuclear ribonucleoprotein L OS=Homo sapiens OX=9606 GN=HNRNPL PE=1 SV=2	0	33.068	15	7	173	7	589	64.1	8.22	76.27	7	0	2.9573	2.87689	3.06217	3.01256	2.85061	3.01193	3.11875	3.02645	2.97642
Q96D71	REPS1	1.26863	0.912712	0.122261	0.268804	0.343266			1.95495			RalBP1-associated Eps domain-containing protein 1 OS=Homo sapiens OX=9606 GN=REPS1 PE=1 SV=3	0	33.016	17	8	48	8	796	86.6	5.69	15.66	8	0	-0.53907	-0.801182	-0.819003	-1.27582	-0.537796	-0.782665	-0.958747	-1.35964	-0.870663
Q8IWF2	FOXRED2	1.03288	0.063186	0.864597	0.938284	0.046679			0.181777		ERFAD	FAD-dependent oxidoreductase domain-containing protein 2 OS=Homo sapiens OX=9606 GN=FOXRED2 PE=1 SV=1	0	33.013	13	7	99	7	684	77.7	7.72	30.96	7	0	-0.00263201	0.384935	0.7976	0.106656	-0.154242	0.838241	0.565915	0.196798	0.277152
P24928	POLR2A	0.589929	2.28404	0.00519948	0.0937561	-0.761386			-5.53735	+	POLR2	DNA-directed RNA polymerase II subunit RPB1 OS=Homo sapiens OX=9606 GN=POLR2A PE=1 SV=2	0	32.987	6	10	100	10	1970	217	7.37	35.92	10	0	-1.11953	-0.720454	-1.11402	-1.07713	-1.56778	-2.49126	-0.195108	-0.298674	-0.176073
Q8N5A5	ZGPAT	0.776028	0.901265	0.125527	0.277213	-0.36582			-1.932		GPATC6 GPATCH6 KIAA1847 ZC3H9 ZC3HDC9 ZIP	Zinc finger CCCH-type with G patch domain-containing protein OS=Homo sapiens OX=9606 GN=ZGPAT PE=1 SV=3	0	32.961	17	8	110	8	531	57.3	5.43	38.26	8	0	0.417271	0.296383	0.609922	-0.0561313	0.172069	0.388817	1.13496	0.686488	0.599584
Q96B67	ARRDC3	0.594483	0.425774	0.375168	0.605838	-0.750294			-0.997052		KIAA1376	Arrestin domain-containing protein 3 OS=Homo sapiens OX=9606 GN=ARRDC3 PE=1 SV=1	0	32.943	34	8	80	8	414	46.4	6.6	23.81	8	0	0.299545	-0.86622	-0.189169	0.072432	0.201936	0.687994	1.23565	-0.844165	1.10356
Q52LJ0	FAM98B	0.794512	1.39103	0.0406412	0.141311	-0.331858			-2.98243			Protein FAM98B OS=Homo sapiens OX=9606 GN=FAM98B PE=1 SV=2	0	32.929	24	7	144	7	433	45.5	8.69	73.98	7	0	1.15048	1.23332	1.48278	2.6317	2.7377	2.64819	1.53967	1.70919	1.61329
Q8WVV9	HNRNPLL	0.77984	0.228312	0.591137	0.796932	-0.35875			-0.583071		HNRPLL SRRF	Heterogeneous nuclear ribonucleoprotein L-like OS=Homo sapiens OX=9606 GN=HNRNPLL PE=1 SV=1	0	32.904	18	7	75	7	542	60	7.72	16.1	7	0	-0.841025	-1.97516	-1.91841	-0.423334	-1.0737	-1.72819	-0.679764	-2.20265	-0.775929
Q92696	RABGGTA	0.915663	0.0901364	0.812575	0.911382	-0.127112			-0.253226			Geranylgeranyl transferase type-2 subunit alpha OS=Homo sapiens OX=9606 GN=RABGGTA PE=1 SV=2	0	32.885	23	10	106	10	567	65	5.67	28.82	10	0	-2.82404	-1.49463	-1.46021	-1.63764	-1.19152	-2.28913	-1.37004	-1.89956	-2.12793
Q9Y617	PSAT1	1.30558	0.506213	0.311736	0.544361	0.384687			1.15679		PSA	Phosphoserine aminotransferase OS=Homo sapiens OX=9606 GN=PSAT1 PE=1 SV=2	0	32.852	25	9	136	9	370	40.4	7.66	62.94	9	0	0.256828	1.29127	0.717836	0.317079	0.912483	1.00776	0.513194	0.518301	0.0803818
Q9BY44	EIF2A	2.20146	2.32573	0.00472356	0.0882712	1.13846			5.68606	+		Eukaryotic translation initiation factor 2A OS=Homo sapiens OX=9606 GN=EIF2A PE=1 SV=3	0	32.805	19	8	120	8	585	64.9	8.87	47.43	8	0	1.32506	1.46419	1.30612	0.701446	0.470265	0.246982	0.183184	-0.0853629	0.582161
Q9Y305	ACOT9	1.15904	0.221349	0.600691	0.803138	0.212926			0.56753			Acyl-coenzyme A thioesterase 9, mitochondrial OS=Homo sapiens OX=9606 GN=ACOT9 PE=1 SV=2	0	32.798	19	9	72	9	439	49.9	8.6	34.38	9	0	0.873953	0.902794	0.0156532	0.225432	0.294362	1.60271	0.856934	0.177092	0.119597
Q6ZS17	RIPOR1	0.921384	0.310897	0.488768	0.708352	-0.118125			-0.761526		FAM65A KIAA1930	Rho family-interacting cell polarization regulator 1 OS=Homo sapiens OX=9606 GN=RIPOR1 PE=1 SV=1	0	32.679	9	10	99	10	1223	132.2	6.28	25.07	10	0	-0.581259	-0.84863	-0.932292	-1.0532	-0.736499	-0.909953	-0.663988	-0.475583	-0.868235
P63173	RPL38	1.14079	0.236283	0.580385	0.788474	0.19003			0.600754			Large ribosomal subunit protein eL38 OS=Homo sapiens OX=9606 GN=RPL38 PE=1 SV=2	0	32.666	53	6	190	6	70	8.2	10.1	75.21	6	0	3.02729	3.16687	2.92283	1.84858	1.46945	1.84389	3.45223	2.43671	2.65796
P07947	YES1	1.1548	0.230231	0.58853	0.794979	0.207639			0.587338		YES	Tyrosine-protein kinase Yes OS=Homo sapiens OX=9606 GN=YES1 PE=1 SV=3	0	32.608	14	8	135	6	543	60.8	6.74	70.82	8	2	1.78785	2.0806	1.08163	1.7721	2.00323	2.39314	1.50484	1.0821	1.74022
Q8WUF5	PPP1R13L	1.04448	0.0477607	0.895858	0.952714	0.0627879			0.139417		IASPP NKIP1 PPP1R13BL RAI	RelA-associated inhibitor OS=Homo sapiens OX=9606 GN=PPP1R13L PE=1 SV=4	0	32.599	16	9	75	9	828	89	6.81	20.07	9	0	-2.99068	-2.07516	-2.13248	-1.42789	-1.72375	-1.65845	-3.10301	-2.33553	-1.94813
Q96A19	CCDC102A	1.14678	0.274804	0.531124	0.741723	0.197594			0.684741			Coiled-coil domain-containing protein 102A OS=Homo sapiens OX=9606 GN=CCDC102A PE=1 SV=2	0	32.531	19	8	96	8	550	62.6	5.58	35.42	8	0	-0.6693	-0.401367	-0.593368	-0.0138324	-0.0569314	-0.124242	-0.344866	-1.28195	-0.630003
O75122	CLASP2	1.36408	0.613192	0.243673	0.447994	0.447929			1.36609		KIAA0627	CLIP-associating protein 2 OS=Homo sapiens OX=9606 GN=CLASP2 PE=1 SV=3	0	32.52	10	11	66	11	1294	141	8.4	20.34	11	0	-0.98361	-0.666372	-0.834838	-1.79361	-2.76573	-3.09434	-1.81406	-1.29078	-0.723768
O00425	IGF2BP3	1.15752	0.541733	0.287255	0.509849	0.211043			1.22655		IMP3 KOC1 VICKZ3	Insulin-like growth factor 2 mRNA-binding protein 3 OS=Homo sapiens OX=9606 GN=IGF2BP3 PE=1 SV=2	0	32.5	14	8	124	7	579	63.7	8.87	49.61	8	1	0.508755	0.125682	0.434977	1.76377	1.1678	0.741038	0.0909195	-0.0401075	0.385473
Q99985	SEMA3C	1.12941	0.277965	0.527273	0.740089	0.175569			0.691533		SEMAE	Semaphorin-3C OS=Homo sapiens OX=9606 GN=SEMA3C PE=2 SV=2	0	32.477	14	9	78	9	751	85.2	8.69	24.05	9	0	0.337105	0.203322	-0.109811	0.609756	0.424109	0.625393	0.29731	-0.440436	0.047036
P78316	NOP14	1.36773	1.86376	0.0136848	0.101956	0.451781			4.201		C4orf9 NOL14	Nucleolar protein 14 OS=Homo sapiens OX=9606 GN=NOP14 PE=1 SV=3	0	32.448	13	9	86	9	857	97.6	7.58	30.68	9	0	0.786123	0.605814	0.434375	0.3052	0.463073	0.231089	0.0921592	0.164808	0.214001
Q9H6R7	WDCP	0.661348	0.986508	0.103155	0.241858	-0.59652			-2.10427		C2orf44	WD repeat and coiled-coil-containing protein OS=Homo sapiens OX=9606 GN=WDCP PE=1 SV=1	0	32.383	14	7	129	7	721	79.1	6.7	46.19	7	0	1.01933	0.764904	1.19359	0.0487013	1.05933	0.12346	1.64704	1.99845	1.12189
P33527	ABCC1	1.1383	0.432031	0.369802	0.604587	0.186877			1.00959		MRP MRP1	Multidrug resistance-associated protein 1 OS=Homo sapiens OX=9606 GN=ABCC1 PE=1 SV=3	0	32.371	9	10	36	10	1531	171.5	7.11	12.98	10	0	-2.08018	-2.32069	-2.61297	-1.36753	-1.57222	-1.64941	-2.47287	-2.72277	-2.37883
Q9Y3Z3	SAMHD1	0.721085	1.41264	0.0386689	0.136284	-0.471759			-3.03294		MOP5	Deoxynucleoside triphosphate triphosphohydrolase SAMHD1 OS=Homo sapiens OX=9606 GN=SAMHD1 PE=1 SV=2	0	32.367	16	9	140	9	626	72.2	7.14	57.85	9	0	0.0410042	-0.378222	0.0162604	-0.0840404	0.939221	0.760341	0.506554	0.340535	0.24723
P29590	PML	1.46325	0.765166	0.171725	0.350256	0.549173			1.66261		MYL PP8675 RNF71 TRIM19	Protein PML OS=Homo sapiens OX=9606 GN=PML PE=1 SV=3	0	32.326	13	9	95	9	882	97.5	6.21	31.99	9	0	-0.181683	0.209457	-0.177867	1.00065	0.801638	0.583343	-0.115698	-0.522409	-1.15951
Q9Y6C9	MTCH2	1.37592	1.12366	0.0752215	0.196334	0.460396			2.38934		MIMP	Mitochondrial carrier homolog 2 OS=Homo sapiens OX=9606 GN=MTCH2 PE=1 SV=1	0	32.304	27	6	98	6	303	33.3	7.97	38.48	6	0	1.07318	1.14226	0.572744	1.53471	1.07349	1.63312	0.597844	0.356183	0.45297
Q9H6F5	CCDC86	0.917414	0.780197	0.165883	0.342594	-0.124355			-1.6921		CYCLON	Coiled-coil domain-containing protein 86 OS=Homo sapiens OX=9606 GN=CCDC86 PE=1 SV=1	0	32.29	21	6	128	6	360	40.2	10.33	54.41	6	0	1.67688	1.73151	1.73378	1.87425	1.3241	1.56011	1.87885	1.70013	1.93626
Q9UBU9	NXF1	2.93307	3.20356	0.000625801	0.084	1.55241			9.72585	+	TAP	Nuclear RNA export factor 1 OS=Homo sapiens OX=9606 GN=NXF1 PE=1 SV=1	0	32.22	23	9	93	9	619	70.1	8.51	26.83	9	0	-0.0774195	0.105458	-0.0700057	-0.114765	-0.116453	-0.866723	-1.58404	-1.81348	-1.30168
Q5T3I0	GPATCH4	1.23527	1.44615	0.0357972	0.128871	0.304822			3.11215		GPATC4	G patch domain-containing protein 4 OS=Homo sapiens OX=9606 GN=GPATCH4 PE=1 SV=2	0	32.181	25	8	69	8	446	50.4	9.63	22.28	8	0	0.238993	0.101251	-0.0879927	-0.555019	-1.03588	-1.23359	-0.225357	-0.26101	-0.175848
Q9NRF8	CTPS2	0.906266	0.211894	0.613912	0.813357	-0.141994			-0.546284			CTP synthase 2 OS=Homo sapiens OX=9606 GN=CTPS2 PE=1 SV=1	0	32.159	18	9	103	7	586	65.6	6.9	40.27	9	0	-1.01353	-1.63629	-0.867184	-0.467242	-0.279774	-0.392074	-1.23407	-0.997486	-0.859476
P55209	NAP1L1	1.02156	0.0428886	0.905965	0.956108	0.0307776			0.125793		NRP	Nucleosome assembly protein 1-like 1 OS=Homo sapiens OX=9606 GN=NAP1L1 PE=1 SV=1	0	32.154	22	7	115	5	391	45.3	4.46	53.54	7	0	0.699968	1.02101	0.831481	1.31428	1.56232	1.35298	0.74472	0.471325	1.24408
P61513	RPL37A	1.13938	0.345942	0.450877	0.676833	0.188246			0.834624			Large ribosomal subunit protein eL43 OS=Homo sapiens OX=9606 GN=RPL37A PE=1 SV=2	0	32.148	66	7	390	7	92	10.3	10.43	213.36	7	0	5.46088	5.34562	5.22002	5.21696	4.95464	5.16252	5.4616	4.74105	5.25915
Q8IWT6	LRRC8A	2.26158	1.83071	0.0147668	0.104181	1.17733			4.10712	+	KIAA1437 LRRC8 SWELL1	Volume-regulated anion channel subunit LRRC8A OS=Homo sapiens OX=9606 GN=LRRC8A PE=1 SV=1	0	32.144	14	9	152	9	810	94.1	7.94	47.04	9	0	0.760017	0.41186	0.152698	0.725594	0.597111	0.298967	-0.658119	-1.16081	-0.388491
P29323	EPHB2	1.2617	0.463465	0.343982	0.58079	0.335366			1.07227		DRT EPHT3 EPTH3 ERK HEK5 TYRO5	Ephrin type-B receptor 2 OS=Homo sapiens OX=9606 GN=EPHB2 PE=1 SV=5	0	32.126	11	9	128	8	1055	117.4	6.55	65.06	9	0	-0.159089	-0.542941	-0.838239	0.322257	0.366749	0.265855	-0.40655	-1.24545	-0.894371
P34897	SHMT2	1.111	0.286706	0.516766	0.731182	0.151857			0.710247			Serine hydroxymethyltransferase, mitochondrial OS=Homo sapiens OX=9606 GN=SHMT2 PE=1 SV=3	0	32.118	26	10	155	10	504	56	8.53	64.46	10	0	0.8192	1.50335	0.998406	0.810395	1.0151	0.966713	0.925108	0.867136	1.07314
Q8NCD3	HJURP	1.21661	0.767587	0.170771	0.348445	0.282862			1.66736		FAKTS FLEG1 URLC9	Holliday junction recognition protein OS=Homo sapiens OX=9606 GN=HJURP PE=1 SV=2	0	32.104	17	9	65	9	748	83.5	9.31	20.4	9	0	-0.330717	-0.0845345	-0.338637	-0.857569	-0.725655	-0.561085	-0.827176	-0.354895	-0.420403
Q9UL25	RAB21	0.996675	0.0127384	0.971095	0.983458	-0.00480551			-0.0385523		KIAA0118	Ras-related protein Rab-21 OS=Homo sapiens OX=9606 GN=RAB21 PE=1 SV=3	0	32.096	25	6	162	6	225	24.3	7.94	68.42	6	0	-0.093419	0.0314913	0.0798285	0.285131	0.388412	0.231458	0.0164831	-0.18854	0.204374
Q9HC36	MRM3	0.794122	0.280457	0.524255	0.736964	-0.332568			-0.696879		RNMTL1	rRNA methyltransferase 3, mitochondrial OS=Homo sapiens OX=9606 GN=MRM3 PE=1 SV=2	0	32.094	17	7	139	7	420	47	8.73	55.24	7	0	1.33691	0.485033	1.53149	1.22033	0.146151	0.169078	0.749588	1.87239	1.72915
P43686	PSMC4	0.872813	0.397055	0.400816	0.634046	-0.196256			-0.939172		MIP224 TBP7	26S proteasome regulatory subunit 6B OS=Homo sapiens OX=9606 GN=PSMC4 PE=1 SV=2	0	32.078	22	7	135	7	418	47.3	5.21	45.39	7	0	0.259626	0.898292	0.765399	0.737261	0.699772	0.355436	0.685288	0.90356	0.923237
Q9UMR2	DDX19B	0.913792	1.30321	0.0497493	0.161333	-0.130062			-2.78136		DBP5 DDX19 TDBP	ATP-dependent RNA helicase DDX19B OS=Homo sapiens OX=9606 GN=DDX19B PE=1 SV=1	0	32.061	18	8	160	8	479	53.9	6.3	57.9	8	0	1.68306	1.78932	1.70845	1.32652	1.75117	1.8158	1.81603	1.83036	1.92463
Q15084	PDIA6	0.602176	0.455112	0.350662	0.587904	-0.731742			-1.05567		ERP5 P5 TXNDC7	Protein disulfide-isomerase A6 OS=Homo sapiens OX=9606 GN=PDIA6 PE=1 SV=1	0	32.06	19	6	102	6	440	48.1	5.08	40.57	6	0	-0.802132	0.68046	1.01683	-1.07611	-0.163854	-0.920685	0.214007	1.36598	1.5104
Q15036	SNX17	1.16999	0.307912	0.492139	0.709057	0.226496			0.755237		KIAA0064	Sorting nexin-17 OS=Homo sapiens OX=9606 GN=SNX17 PE=1 SV=1	0	32.028	23	9	126	9	470	52.9	7.46	44.53	9	0	-0.909142	-1.25382	-1.35757	-0.946369	-0.451861	-0.502074	-1.03573	-1.92154	-1.24276
Q02880	TOP2B	1.68423	1.74023	0.0181875	0.107015	0.752088			3.8574			DNA topoisomerase 2-beta OS=Homo sapiens OX=9606 GN=TOP2B PE=1 SV=3	0	32.018	8	9	68	9	1626	183.2	8	16.87	9	0	-0.575405	-1.16049	-0.867825	-1.40482	-0.641473	-1.46393	-1.73911	-1.69393	-1.42694
Q01546	KRT76	0.835625	0.155384	0.699223	0.86066	-0.259073			-0.415315		KRT2B KRT2P	Keratin, type II cytoskeletal 2 oral OS=Homo sapiens OX=9606 GN=KRT76 PE=1 SV=2	0	32.013	9	8	170	2	638	65.8	8.12	89.89	8	0	3.24453	2.22183	3.96209	0.338641	1.03222	0.684882	2.80352	4.06708	3.33507
O14983	ATP2A1	1.00253	0.0106022	0.975883	0.987666	0.00364284			0.0321628			Sarcoplasmic/endoplasmic reticulum calcium ATPase 1 OS=Homo sapiens OX=9606 GN=ATP2A1 PE=1 SV=1	0	31.978	13	9	143	9	1001	110.2	5.16	67.42	9	0	1.8425	1.69372	1.68405	2.30265	2.5339	2.32458	1.65357	1.61837	1.9374
Q8N201	INTS1	1.03297	0.0857192	0.820882	0.916023	0.0468018			0.241722		KIAA1440	Integrator complex subunit 1 OS=Homo sapiens OX=9606 GN=INTS1 PE=1 SV=2	0	31.956	6	10	51	10	2190	244.1	6.13	11.37	10	0	-0.67946	-0.219575	-0.381047	-0.126738	-0.235917	-0.0808351	-0.298589	-0.748256	-0.373642
Q9P0V3	SH3BP4	0.775801	0.669077	0.214251	0.411543	-0.366241			-1.47494		BOG25 EHB10 TTP	SH3 domain-binding protein 4 OS=Homo sapiens OX=9606 GN=SH3BP4 PE=1 SV=1	0	31.923	12	9	67	9	963	107.4	7.71	21.68	9	0	-0.693528	-0.928307	-0.29518	0.423196	-1.28696	-0.355916	-0.447374	-0.429719	0.0587993
O15013	ARHGEF10	0.818786	0.269837	0.537233	0.745395	-0.288442			-0.674038		KIAA0294	Rho guanine nucleotide exchange factor 10 OS=Homo sapiens OX=9606 GN=ARHGEF10 PE=1 SV=4	0	31.919	11	10	47	10	1369	151.5	5.68	9.61	10	0	-1.46287	-0.679431	-1.35705	-1.56045	-1.06782	-1.09623	-1.36935	-0.199179	-1.0655
O75569	PRKRA	1.23106	1.03966	0.0912719	0.223149	0.299902			2.21348		PACT RAX	Interferon-inducible double-stranded RNA-dependent protein kinase activator A OS=Homo sapiens OX=9606 GN=PRKRA PE=1 SV=1	0	31.895	30	7	95	7	313	34.4	8.41	31.75	7	0	1.69429	1.43972	1.62121	1.21599	1.47255	1.12287	1.50727	1.20401	1.14423
O94804	STK10	1.5937	0.778932	0.166367	0.342554	0.672383			1.68962		LOK	Serine/threonine-protein kinase 10 OS=Homo sapiens OX=9606 GN=STK10 PE=1 SV=1	0	31.884	12	9	72	8	968	112.1	6.95	22.42	9	0	-1.00569	-1.04191	-2.20438	-0.0577382	-0.000396151	0.0619959	-2.03257	-2.20615	-2.03041
O14734	ACOT8	0.721253	1.91593	0.0121359	0.102057	-0.471423			-4.35222		ACTEIII PTE1	Acyl-coenzyme A thioesterase 8 OS=Homo sapiens OX=9606 GN=ACOT8 PE=1 SV=1	0	31.873	31	6	72	6	319	35.9	7.56	22.07	6	0	0.473736	0.377183	0.586399	0.987961	0.764002	0.4767	0.78359	0.976271	1.09173
Q15436	SEC23A	1.18002	0.567316	0.270822	0.486034	0.238808			1.2766			Protein transport protein Sec23A OS=Homo sapiens OX=9606 GN=SEC23A PE=1 SV=2	0	31.857	13	7	124	5	765	86.1	7.08	34.71	7	2	0.757334	0.646205	1.08883	0.769368	0.700731	0.896027	0.851038	0.502729	0.422183
Q9NSV4	DIAPH3	0.636455	1.61016	0.024538	0.113804	-0.651869			-3.51602		DIAP3	Protein diaphanous homolog 3 OS=Homo sapiens OX=9606 GN=DIAPH3 PE=1 SV=4	0	31.825	9	9	87	9	1193	136.8	7.03	38.73	9	0	0.477278	0.272245	0.5004	-0.257826	0.0331697	-0.452833	0.762689	1.35258	1.09026
P13807	GYS1	0.81525	0.951074	0.111925	0.255954	-0.294686			-2.03226		GYS	Glycogen [starch] synthase, muscle OS=Homo sapiens OX=9606 GN=GYS1 PE=1 SV=2	0	31.792	12	6	133	6	737	83.7	6.18	38.05	6	0	-0.424308	-0.195652	-0.186826	0.693029	0.0755986	-0.449022	-0.217096	0.120374	0.173993
P17655	CAPN2	1.10501	1.11201	0.0772658	0.201361	0.144063			2.3647		CANPL2	Calpain-2 catalytic subunit OS=Homo sapiens OX=9606 GN=CAPN2 PE=1 SV=6	0	31.783	17	8	164	8	700	79.9	4.98	79.75	8	0	1.35763	1.50534	1.43305	1.53557	1.60284	1.57317	1.37412	1.25537	1.23435
P07948	LYN	1.06007	0.112995	0.770912	0.890204	0.0841544			0.311597		JTK8	Tyrosine-protein kinase Lyn OS=Homo sapiens OX=9606 GN=LYN PE=1 SV=3	0	31.712	20	8	81	6	512	58.5	7.11	34.39	8	0	0.0230522	0.237076	-0.0542653	0.436017	0.410407	0.599748	0.349393	-0.508101	0.112108
Q32P28	P3H1	0.970799	0.0380194	0.91618	0.961485	-0.0427548			-0.112053		GROS1 LEPRE1	Prolyl 3-hydroxylase 1 OS=Homo sapiens OX=9606 GN=P3H1 PE=1 SV=2	0	31.709	13	7	117	7	736	83.3	5.14	42.65	7	0	-0.362089	0.293105	-0.959909	0.151838	0.651653	0.571424	-0.144811	-0.21708	-0.538738
P61163	ACTR1A	1.4485	0.968896	0.107425	0.246252	0.534558			2.0684		CTRN1	Alpha-centractin OS=Homo sapiens OX=9606 GN=ACTR1A PE=1 SV=1	0	31.707	26	6	88	6	376	42.6	6.64	28.46	6	0	0.726099	-0.01639	0.324385	0.864474	0.87534	0.861195	0.0321899	-0.459827	-0.141943
O00743	PPP6C	1.05084	0.170746	0.674923	0.847549	0.0715437			0.451656		PPP6	Serine/threonine-protein phosphatase 6 catalytic subunit OS=Homo sapiens OX=9606 GN=PPP6C PE=1 SV=1	0	31.699	33	8	134	8	305	35.1	5.69	57.21	8	0	2.63125	2.18651	2.24331	2.26719	2.61217	2.62996	2.39851	2.14314	2.30479
P49643	PRIM2	0.940943	0.0647772	0.861436	0.938458	-0.0878203			-0.186083		PRIM2A	DNA primase large subunit OS=Homo sapiens OX=9606 GN=PRIM2 PE=1 SV=2	0	31.692	16	8	80	8	509	58.8	7.91	27.75	8	0	-1.04333	0.20256	0.309917	-1.63071	-1.88878	-2.55586	-0.288305	0.279895	-0.258978
P27694	RPA1	0.206129	2.64167	0.0022821	0.0797612	-2.27838			-6.92522	+	REPA1 RPA70	Replication protein A 70 kDa DNA-binding subunit OS=Homo sapiens OX=9606 GN=RPA1 PE=1 SV=2	0	31.675	17	8	82	8	616	68.1	7.21	34.33	8	0	-1.85017	-1.2349	-1.61718	0.500223	0.63072	-0.686826	0.635916	1.22178	0.275206
Q9UQ80	PA2G4	1.66885	0.731257	0.18567	0.373095	0.738853			1.59624		EBP1	Proliferation-associated protein 2G4 OS=Homo sapiens OX=9606 GN=PA2G4 PE=1 SV=3	0	31.657	23	8	115	8	394	43.8	6.55	53.36	8	0	1.74376	2.50682	1.93474	0.155751	0.621304	0.967749	1.66589	0.521466	1.78141
P57088	TMEM33	0.974761	0.135694	0.731655	0.87683	-0.0368796			-0.367804		DB83	Transmembrane protein 33 OS=Homo sapiens OX=9606 GN=TMEM33 PE=1 SV=2	0	31.655	27	8	229	8	247	28	9.7	117.01	8	0	3.4155	3.27468	3.51852	3.35554	3.56537	3.45636	3.51239	3.29753	3.50942
O14545	TRAFD1	0.683063	0.7592	0.1741	0.355284	-0.549908			-1.65092		FLN29	TRAF-type zinc finger domain-containing protein 1 OS=Homo sapiens OX=9606 GN=TRAFD1 PE=1 SV=1	0	31.631	19	8	108	8	582	64.8	5.29	29.53	8	0	-0.0741708	-0.689668	-1.17366	-0.128755	-0.233889	-0.914039	-0.17575	0.100235	-0.212259
P35249	RFC4	1.18394	0.779105	0.166301	0.342742	0.243598			1.68996			Replication factor C subunit 4 OS=Homo sapiens OX=9606 GN=RFC4 PE=1 SV=2	0	31.615	23	9	144	9	363	39.7	8.02	67.34	9	0	1.77463	1.76048	2.07872	1.5379	1.61768	1.42873	1.6205	1.80438	1.45816
Q15477	SKIC2	0.810188	0.456302	0.349702	0.586226	-0.303671			-1.05804		DDX13 SKI2W SKIV2 SKIV2L W	Superkiller complex protein 2 OS=Homo sapiens OX=9606 GN=SKIC2 PE=1 SV=3	0	31.6	11	9	82	9	1246	137.7	6.06	18.82	9	0	-2.36741	-1.55113	-1.53128	-1.6738	-1.36905	-1.93163	-1.46891	-1.66928	-1.40063
Q6ZRP7	QSOX2	1.06057	0.299657	0.501583	0.71784	0.0848374			0.73779		QSCN6L1 SOXN	Sulfhydryl oxidase 2 OS=Homo sapiens OX=9606 GN=QSOX2 PE=1 SV=3	0	31.533	17	9	59	9	698	77.5	7.72	16.12	9	0	-0.505728	-0.514336	-0.626949	-0.198948	-0.156253	-0.148468	-0.566638	-0.845502	-0.489386
Q9HAU5	UPF2	1.1513	0.391393	0.406075	0.637249	0.203259			0.927695		KIAA1408 RENT2	Regulator of nonsense transcripts 2 OS=Homo sapiens OX=9606 GN=UPF2 PE=1 SV=1	0	31.517	8	10	68	10	1272	147.7	5.69	23.03	10	0	-2.38606	-2.55256	-2.34901	-2.65573	-5.06969	-3.44972	-2.99864	-2.62743	-2.27134
Q9NPQ8	RIC8A	1.07804	0.920894	0.119979	0.268461	0.108416			1.97138			Synembryn-A OS=Homo sapiens OX=9606 GN=RIC8A PE=1 SV=3	0	31.513	19	9	191	9	531	59.7	5.33	81.54	9	0	0.733383	0.833558	0.768748	0.609838	0.974095	0.92794	0.596988	0.756508	0.656944
O15321	TM9SF1	1.52466	1.09097	0.0811023	0.20514	0.608488			2.32039			Transmembrane 9 superfamily member 1 OS=Homo sapiens OX=9606 GN=TM9SF1 PE=2 SV=2	0	31.51	15	6	87	6	606	68.8	7.17	34.19	6	0	0.138746	0.138417	0.135776	0.0227597	0.564092	0.0571723	-0.132411	-0.293072	-0.987042
P16435	POR	1.38505	1.14084	0.072304	0.191304	0.469933			2.42585		CYPOR	NADPH--cytochrome P450 reductase OS=Homo sapiens OX=9606 GN=POR PE=1 SV=2	0	31.496	19	10	93	10	677	76.6	5.58	38.05	10	0	-0.0999241	0.308833	-0.316617	0.476563	0.475406	0.546076	-0.421659	-0.627897	-0.467953
Q9HD45	TM9SF3	1.06864	0.478031	0.332636	0.568019	0.0957734			1.10116		SMBP	Transmembrane 9 superfamily member 3 OS=Homo sapiens OX=9606 GN=TM9SF3 PE=1 SV=2	0	31.481	14	7	119	7	589	67.8	7.21	49.69	7	0	0.850735	0.697896	0.734537	1.06414	0.925816	1.20114	0.764893	0.521217	0.709738
O14965	AURKA	0.811932	0.372061	0.42456	0.658928	-0.300569			-0.88832		AIK AIRK1 ARK1 AURA AYK1 BTAK IAK1 STK15 STK6	Aurora kinase A OS=Homo sapiens OX=9606 GN=AURKA PE=1 SV=3	0	31.445	23	7	94	7	403	45.8	9.39	28.73	7	0	-0.439063	-0.681272	-0.516996	-1.59731	-1.76901	-4.20301	0.414823	-0.53729	-0.613155
Q6PJG6	BRAT1	1.05489	0.0498407	0.891578	0.950217	0.0770952			0.145197		BAAT1 C7orf27	BRCA1-associated ATM activator 1 OS=Homo sapiens OX=9606 GN=BRAT1 PE=1 SV=2	0	31.372	14	9	56	9	821	88.1	5.27	16.93	9	0	-2.62119	-2.57893	-1.5338	-2.59448	-1.20918	-2.15438	-2.69919	-2.7326	-1.53341
Q9Y285	FARSA	1.10532	0.514716	0.305692	0.536482	0.144468			1.17353		FARS FARSL FARSLA	Phenylalanine--tRNA ligase alpha subunit OS=Homo sapiens OX=9606 GN=FARSA PE=1 SV=3	0	31.265	26	9	159	9	508	57.5	7.8	93.61	9	0	2.65861	2.52525	2.64122	2.15359	2.2805	2.30997	2.68791	2.30119	2.40257
Q99729	HNRNPAB	0.908677	0.758053	0.174561	0.35649	-0.138161			-1.64867		ABBP1 HNRPAB	Heterogeneous nuclear ribonucleoprotein A/B OS=Homo sapiens OX=9606 GN=HNRNPAB PE=1 SV=2	0	31.261	18	7	267	6	332	36.2	8.21	143.54	7	0	2.01737	1.9858	2.09381	2.12145	2.46705	2.26468	2.02084	2.27978	2.21084
Q99653	CHP1	1.19431	0.473786	0.335903	0.571744	0.256175			1.09275		CHP	Calcineurin B homologous protein 1 OS=Homo sapiens OX=9606 GN=CHP1 PE=1 SV=3	0	31.259	36	7	79	7	195	22.4	5.1	20.31	7	0	0.579601	0.404031	0.241844	0.695295	0.745076	0.665032	0.518262	-0.220135	0.158825
P62888	RPL30	1.1913	0.496386	0.31887	0.55373	0.25254			1.13743			Large ribosomal subunit protein eL30 OS=Homo sapiens OX=9606 GN=RPL30 PE=1 SV=2	0	31.173	59	7	465	7	115	12.8	9.63	255.77	7	0	6.12686	5.86552	5.97144	5.69009	5.54066	5.65756	6.07774	5.35756	5.77091
P36542	ATP5F1C	1.01154	0.0697623	0.851604	0.932808	0.0165563			0.199498		ATP5C ATP5C1 ATP5CL1	ATP synthase subunit gamma, mitochondrial OS=Homo sapiens OX=9606 GN=ATP5F1C PE=1 SV=1	0	31.171	23	7	298	7	298	33	9.22	148.6	7	0	3.22179	3.06714	3.15104	2.54551	2.72117	2.86836	3.24271	3.00198	3.14562
Q96DI7	SNRNP40	1.30807	1.59723	0.0252794	0.114204	0.387438			3.48316		PRP8BP SFP38 WDR57	U5 small nuclear ribonucleoprotein 40 kDa protein OS=Homo sapiens OX=9606 GN=SNRNP40 PE=1 SV=1	0	31.145	29	7	98	7	357	39.3	8.1	40.97	7	0	0.580605	0.693415	0.926246	0.86372	0.66467	0.895138	0.276137	0.429809	0.332005
O75815	BCAR3	0.576094	2.112	0.00772688	0.0877029	-0.795624			-4.95622	+	NSP2 SH2D3B	Breast cancer anti-estrogen resistance protein 3 OS=Homo sapiens OX=9606 GN=BCAR3 PE=1 SV=1	0	31.132	11	8	98	8	825	92.5	7.96	42.77	8	0	0.130169	0.395244	0.546462	0.167721	0.370795	0.509144	1.13928	1.34074	0.978719
P16152	CBR1	1.12975	0.457592	0.348664	0.586152	0.176006			1.0606		CBR CRN SDR21C1	Carbonyl reductase [NADPH] 1 OS=Homo sapiens OX=9606 GN=CBR1 PE=1 SV=3	0	31.125	35	7	107	5	277	30.4	8.32	49.03	7	2	0.519459	1.00097	0.512244	0.591974	0.772462	0.634625	0.568304	0.496723	0.439631
Q12907	LMAN2	1.08687	0.424487	0.376282	0.606707	0.120173			0.99447		C5orf8	Vesicular integral-membrane protein VIP36 OS=Homo sapiens OX=9606 GN=LMAN2 PE=1 SV=1	0	31.094	17	7	95	7	356	40.2	6.95	32.51	7	0	-0.465668	-0.283422	-0.496274	0.0662494	0.0246515	0.181437	-0.68134	-0.582972	-0.341572
P24844	MYL9	1.02208	0.0269592	0.939812	0.974538	0.0315029			0.080359		MLC2 MRLC1 MYRL2	Myosin regulatory light polypeptide 9 OS=Homo sapiens OX=9606 GN=MYL9 PE=1 SV=4	0	31.048	32	5	764	5	172	19.8	4.92	421.95	5	0	7.36258	6.85754	7.02357	7.8004	7.76565	7.93591	7.57043	6.35183	7.22692
P05783	KRT18	1.08071	0.123987	0.751645	0.885746	0.111978			0.339021		CYK18	Keratin, type I cytoskeletal 18 OS=Homo sapiens OX=9606 GN=KRT18 PE=1 SV=2	0	30.959	20	9	123	7	430	48	5.45	54.71	9	1	0.432785	1.41522	0.435421	-0.259623	-0.174963	0.488939	0.651611	0.728087	0.567794
Q9Y4K0	LOXL2	0.717404	0.825458	0.149466	0.317432	-0.479141			-1.78125			Lysyl oxidase homolog 2 OS=Homo sapiens OX=9606 GN=LOXL2 PE=1 SV=1	0	30.955	14	7	39	7	774	86.7	6.38	8.18	7	0	-0.670397	-0.874218	-0.979977	-0.711723	-1.05832	-0.261871	0.118537	-0.465592	-0.740112
O14979	HNRNPDL	0.721343	1.4614	0.0345618	0.127887	-0.471243			-3.14856		HNRPDL JKTBP	Heterogeneous nuclear ribonucleoprotein D-like OS=Homo sapiens OX=9606 GN=HNRNPDL PE=1 SV=3	0	30.91	13	8	316	6	420	46.4	9.57	164.42	8	2	4.24184	4.2001	4.4137	4.53691	4.42466	4.82284	4.86135	4.91879	4.48922
P26583	HMGB2	1.49437	1.43742	0.0365242	0.130719	0.579541			3.09141		HMG2	High mobility group protein B2 OS=Homo sapiens OX=9606 GN=HMGB2 PE=1 SV=2	0	30.908	37	8	89	6	209	24	7.81	32.14	8	0	-0.430335	-0.583788	-0.161065	-0.913427	-0.769228	-3.05188	-1.2498	-0.793822	-0.870192
Q9BYJ9	YTHDF1	1.12972	0.451556	0.353544	0.591765	0.175959			1.04859		C20orf21	YTH domain-containing family protein 1 OS=Homo sapiens OX=9606 GN=YTHDF1 PE=1 SV=1	0	30.9	14	6	85	2	559	60.8	8.79	30.55	6	3	0.42597	0.699927	0.631633	-1.45756	-1.41278	-1.56373	0.176052	0.678895	0.374705
Q14978	NOLC1	1.59406	1.28223	0.0522115	0.164786	0.672702			2.73429		KIAA0035 NS5ATP13	Nucleolar and coiled-body phosphoprotein 1 OS=Homo sapiens OX=9606 GN=NOLC1 PE=1 SV=2	0	30.858	12	7	70	7	699	73.6	9.47	20.41	7	0	0.47221	0.51398	0.294678	-0.945577	-0.951611	-1.29343	0.226989	-0.502505	-0.461721
Q6P1M0	SLC27A4	1.07761	0.152028	0.704648	0.861392	0.107836			0.407292		ACSVL4 FATP4	Long-chain fatty acid transport protein 4 OS=Homo sapiens OX=9606 GN=SLC27A4 PE=1 SV=1	0	30.818	14	8	178	8	643	72	8.47	63.11	8	0	-0.0208889	-0.0299747	0.514487	0.17394	0.169958	0.586451	-0.327797	0.322948	0.144964
O14602	EIF1AY	1.16007	0.285618	0.518062	0.732169	0.214207			0.707923			Eukaryotic translation initiation factor 1A, Y-chromosomal OS=Homo sapiens OX=9606 GN=EIF1AY PE=1 SV=4	0	30.814	57	6	88	6	144	16.4	5.24	33.85	6	0	1.97915	1.30156	1.98646	1.44338	1.21056	1.45816	1.18031	1.87083	1.57341
Q6RFH5	WDR74	1.0609	0.156878	0.696822	0.85811	0.0852858			0.418874		NSA1	WD repeat-containing protein 74 OS=Homo sapiens OX=9606 GN=WDR74 PE=1 SV=1	0	30.794	21	8	81	8	385	42.4	8.32	34.95	8	0	-0.0897592	0.250509	-0.116551	-1.67862	-1.10004	-1.41025	0.0980847	-0.402191	0.0924467
Q9NZN5	ARHGEF12	0.807496	0.961772	0.109201	0.250036	-0.308474			-2.05394		KIAA0382 LARG	Rho guanine nucleotide exchange factor 12 OS=Homo sapiens OX=9606 GN=ARHGEF12 PE=1 SV=1	0	30.782	7	9	83	9	1544	173.1	5.74	22.25	9	0	-0.234556	-0.677522	-0.375552	-0.707059	-0.541094	-0.693144	0.00846435	-0.24806	-0.122614
P49207	RPL34	1.11834	0.206274	0.621907	0.81751	0.161364			0.533574			Large ribosomal subunit protein eL34 OS=Homo sapiens OX=9606 GN=RPL34 PE=1 SV=3	0	30.773	38	7	410	7	117	13.3	11.47	198.28	7	0	5.80936	5.81348	5.53922	5.42495	5.05645	5.36345	5.97754	5.00598	5.69444
Q6ZNB6	NFXL1	1.24169	0.361114	0.435398	0.661959	0.312307			0.865889		OZFP	NF-X1-type zinc finger protein NFXL1 OS=Homo sapiens OX=9606 GN=NFXL1 PE=1 SV=2	0	30.721	14	7	105	7	911	101.3	8.41	42.61	7	0	1.19292	0.999021	1.18275	-0.317804	0.475529	0.550149	1.22681	0.105809	1.10515
Q09161	NCBP1	1.15647	0.508475	0.310117	0.543136	0.209723			1.16125		CBP80 NCBP	Nuclear cap-binding protein subunit 1 OS=Homo sapiens OX=9606 GN=NCBP1 PE=1 SV=1	0	30.663	11	8	85	8	790	91.8	6.43	32.82	8	0	0.0321732	-0.145051	-0.147356	-0.131845	0.864876	0.0710174	0.0255079	-0.554884	-0.360027
Q96N66	MBOAT7	1.45069	0.581786	0.261948	0.472317	0.536735			1.30485		BB1 LENG4 OACT7	Lysophospholipid acyltransferase 7 OS=Homo sapiens OX=9606 GN=MBOAT7 PE=1 SV=2	0	30.604	15	6	137	6	472	52.7	8.97	66.95	6	0	2.24995	1.93351	1.90221	2.76373	3.0775	3.02849	1.82851	0.702535	1.94442
Q9Y4E1	WASHC2C	0.72908	0.588577	0.257883	0.467107	-0.455851			-1.3181		FAM21C KIAA0592 VPEF	WASH complex subunit 2C OS=Homo sapiens OX=9606 GN=WASHC2C PE=1 SV=5	0	30.602	10	8	46	8	1341	147.1	4.81	8.69	8	0	0.13772	-0.0876595	-0.268027	0.773601	-0.030816	0.0947945	1.01845	0.187343	-0.0562019
Q9H4B6	SAV1	0.680976	0.411589	0.387625	0.618705	-0.554325			-0.968532		WW45	Protein salvador homolog 1 OS=Homo sapiens OX=9606 GN=SAV1 PE=1 SV=2	0	30.585	19	6	147	6	383	44.6	9.09	72.57	6	0	0.572222	0.821745	1.77686	0.243094	0.421051	0.308613	1.18133	2.4894	1.16307
Q99623	PHB2	0.904327	0.374603	0.422082	0.655896	-0.145084			-0.893515		BAP REA	Prohibitin-2 OS=Homo sapiens OX=9606 GN=PHB2 PE=1 SV=2	0	30.479	30	7	152	7	299	33.3	9.83	67.24	7	0	1.82636	2.09986	1.63723	2.40982	1.99473	2.55179	1.88447	1.9344	2.17984
Q9BVP2	GNL3	1.09769	0.207154	0.620648	0.817654	0.134472			0.535568		E2IG3 NS	Guanine nucleotide-binding protein-like 3 OS=Homo sapiens OX=9606 GN=GNL3 PE=1 SV=2	0	30.452	16	7	115	7	549	62	9.16	36.77	7	0	0.642057	0.687991	0.722806	0.273122	0.318381	0.416237	0.631899	0.0816469	0.935892
P63241	EIF5A	1.39435	1.49806	0.0317643	0.121707	0.479592			3.23699			Eukaryotic translation initiation factor 5A-1 OS=Homo sapiens OX=9606 GN=EIF5A PE=1 SV=2	0	30.449	34	4	177	4	154	16.8	5.24	75.4	4	0	2.50767	2.86372	2.77729	2.13549	2.62912	2.5608	2.43718	2.17101	2.10172
P16402	H1-3	1.10468	0.591671	0.256052	0.467373	0.14363			1.32414		H1F3 HIST1H1D	Histone H1.3 OS=Homo sapiens OX=9606 GN=H1-3 PE=1 SV=2	0	30.413	15	5	234	5	221	22.3	11.02	119.56	5	0	3.24378	3.28846	3.16215	3.60866	3.2641	2.68396	3.2766	2.9266	3.06031
P10412	H1-4	1.10468	0.591671	0.256052	0.467053	0.14363			1.32414		H1F4 HIST1H1E	Histone H1.4 OS=Homo sapiens OX=9606 GN=H1-4 PE=1 SV=2	0	30.413	16	5	234	5	219	21.9	11.03	119.56	5	0	3.24378	3.28846	3.16215	3.60866	3.2641	2.68396	3.2766	2.9266	3.06031
P16403	H1-2	1.10468	0.591671	0.256052	0.466734	0.14363			1.32414		H1F2 HIST1H1C	Histone H1.2 OS=Homo sapiens OX=9606 GN=H1-2 PE=1 SV=2	0	30.413	16	5	234	5	213	21.4	10.93	119.56	5	0	3.24378	3.28846	3.16215	3.60866	3.2641	2.68396	3.2766	2.9266	3.06031
Q07954	LRP1	0.786724	0.689665	0.204331	0.396916	-0.34607			-1.51506		A2MR APR	Prolow-density lipoprotein receptor-related protein 1 OS=Homo sapiens OX=9606 GN=LRP1 PE=1 SV=2	0	30.406	2	10	59	10	4544	504.3	5.39	15.07	10	0	-1.50173	-2.23245	-2.01525	-1.00739	-0.721682	-0.825819	-1.69895	-1.44844	-1.56383
P62979	RPS27A	1.20078	0.442049	0.361369	0.599897	0.263974			1.02963		UBA80 UBCEP1	Ubiquitin-ribosomal protein eS31 fusion protein OS=Homo sapiens OX=9606 GN=RPS27A PE=1 SV=2	0	30.404	47	7	162	7	156	18	9.64	65.69	7	0	2.31398	1.58293	1.68296	2.27017	1.71158	1.10823	1.45137	1.51208	1.82451
Q9P246	STIM2	0.621913	0.543248	0.286255	0.508904	-0.685216			-1.22952		KIAA1482	Stromal interaction molecule 2 OS=Homo sapiens OX=9606 GN=STIM2 PE=1 SV=2	0	30.368	17	9	71	9	746	83.9	6.76	26.19	9	0	-1.69104	-0.0742974	-1.20196	-2.30931	-2.22779	-2.09361	-0.401093	0.231788	-0.742346
P51398	DAP3	1.06448	1.06372	0.086353	0.215124	0.090155			2.26342		MRPS29	Small ribosomal subunit protein mS29 OS=Homo sapiens OX=9606 GN=DAP3 PE=1 SV=1	0	30.363	30	8	68	8	398	45.5	8.88	13.48	8	0	0.856739	0.96086	0.985524	0.631011	0.754646	0.495991	0.853884	0.83526	0.843515
Q9NNW5	WDR6	1.44337	0.549765	0.281991	0.503941	0.529437			1.24228			tRNA (34-2'-O)-methyltransferase regulator WDR6 OS=Homo sapiens OX=9606 GN=WDR6 PE=1 SV=1	0	30.323	10	8	69	8	1121	121.6	6.87	21.75	8	0	0.130388	-0.0453465	-0.0690296	0.449172	0.0394294	-0.179399	0.291206	-1.11745	-0.746052
Q02818	NUCB1	0.339001	2.19648	0.00636086	0.0894324	-1.56064			-5.23525	+	NUC	Nucleobindin-1 OS=Homo sapiens OX=9606 GN=NUCB1 PE=1 SV=4	0	30.305	18	7	96	7	461	53.8	5.25	39.49	7	0	0.117596	-0.174699	0.466107	0.346071	0.559718	0.442311	1.22989	1.93752	1.92351
Q96C92	ENTR1	0.422075	2.0186	0.0095807	0.109306	-1.24443			-4.66124	+	SDCCAG3	Endosome-associated-trafficking regulator 1 OS=Homo sapiens OX=9606 GN=ENTR1 PE=1 SV=3	0	30.276	24	8	108	8	435	47.9	5.14	38.56	8	0	0.582153	-0.108849	-0.00581323	0.118135	0.210571	0.0403246	1.19047	1.70972	1.30059
Q9NTK5	OLA1	1.54858	1.46687	0.0341297	0.126947	0.630946			3.16166		GTPBP9	Obg-like ATPase 1 OS=Homo sapiens OX=9606 GN=OLA1 PE=1 SV=2	0	30.254	32	8	71	8	396	44.7	7.81	19.91	8	0	-0.713161	-0.215	-0.743283	-1.25066	-0.887595	-0.677791	-1.06625	-1.10649	-1.39154
Q9BYW2	SETD2	0.714357	0.299235	0.50207	0.718228	-0.485282			-0.736896		HIF1 HYPB KIAA1732 KMT3A SET2	Histone-lysine N-methyltransferase SETD2 OS=Homo sapiens OX=9606 GN=SETD2 PE=1 SV=3	0	30.206	5	9	37	9	2564	287.4	6.14	11.65	9	0	-3.50155	-3.2383	-1.84121	-4.05409	-5.0919	-3.57936	-3.00991	-1.60767	-2.50763
Q99590	SCAF11	0.89638	0.146321	0.713968	0.8673	-0.157818			-0.393582		CASP11 SFRS2IP SIP1 SRSF2IP	Protein SCAF11 OS=Homo sapiens OX=9606 GN=SCAF11 PE=1 SV=2	0	30.202	8	8	67	8	1463	164.6	8.41	17.67	8	0	1.25027	0.393384	1.39263	0.490368	0.249392	0.969714	0.849859	1.66663	0.993243
Q8TBB5	KLHDC4	0.961279	0.0876995	0.817148	0.913951	-0.0569731			-0.246889			Kelch domain-containing protein 4 OS=Homo sapiens OX=9606 GN=KLHDC4 PE=1 SV=1	0	30.155	16	7	86	7	520	57.9	5.72	33.48	7	0	1.81442	1.87429	1.87516	0.854369	0.999318	1.01111	2.12066	1.45243	2.1617
O14776	TCERG1	1.45933	0.512182	0.30748	0.538892	0.545309			1.16854		CA150 TAF2S	Transcription elongation regulator 1 OS=Homo sapiens OX=9606 GN=TCERG1 PE=1 SV=2	0	30.147	9	8	105	8	1098	123.8	8.65	40.19	8	0	-0.459639	-0.345537	-0.187199	-0.672988	-0.514105	-0.510192	-0.449881	-1.79514	-0.383278
Q9BZL6	PRKD2	1.58532	0.757888	0.174627	0.35659	0.664776			1.64834		PKD2	Serine/threonine-protein kinase D2 OS=Homo sapiens OX=9606 GN=PRKD2 PE=1 SV=3	0	30.145	12	8	76	8	878	96.7	6.84	33.49	8	0	-1.01442	-2.24052	-1.05531	-1.74119	-0.553383	-1.71609	-2.12583	-2.03883	-2.13991
Q58FG0	HSP90AA5P	0.904184	0.418266	0.38171	0.612142	-0.145311			-0.981974		HSP90AE	Putative heat shock protein HSP 90-alpha A5 OS=Homo sapiens OX=9606 GN=HSP90AA5P PE=2 SV=1	0	30.138	14	6	128	4	334	38.7	6.57	62.11	6	0	2.01144	2.43341	2.42532	1.97197	1.25335	2.45879	2.33837	2.50388	2.46387
Q9BU23	LMF2	0.743453	0.490791	0.323005	0.558254	-0.427687			-1.12638		TMEM112B TMEM153	Lipase maturation factor 2 OS=Homo sapiens OX=9606 GN=LMF2 PE=1 SV=2	0	30.11	13	7	89	7	707	79.6	10.1	32.28	7	0	0.990683	0.612305	-0.270435	0.682272	1.28246	0.120578	0.740165	0.964204	0.911244
A6NIZ1	RAP1BL	0.940699	0.113298	0.770375	0.890328	-0.088195			-0.312357			Ras-related protein Rap-1b-like protein OS=Homo sapiens OX=9606 GN=RAP1BL PE=2 SV=1	0	30.11	51	7	186	1	184	20.9	5.48	95.03	7	0	1.58418	1.29782	1.52558	1.82816	1.95451	2.27524	1.67504	1.0448	1.95233
Q93050	ATP6V0A1	1.66735	2.04684	0.00897767	0.0936559	0.737557			4.74898	+	ATP6N1 ATP6N1A VPP1	V-type proton ATPase 116 kDa subunit a 1 OS=Homo sapiens OX=9606 GN=ATP6V0A1 PE=1 SV=3	0	30.106	11	7	119	7	837	96.4	6.43	52.5	7	0	0.69669	0.859147	0.415866	2.37068	2.65598	2.52066	0.0063948	-0.251862	0.00449938
Q5JTZ9	AARS2	0.996448	0.00445935	0.989785	0.994135	-0.00513391			-0.0136212		AARSL KIAA1270	Alanine--tRNA ligase, mitochondrial OS=Homo sapiens OX=9606 GN=AARS2 PE=1 SV=1	0	30.069	10	9	40	9	985	107.3	6.27	9.22	9	0	-1.04814	-0.655583	-1.41143	-0.906528	-0.991889	-1.83151	-0.615009	-1.63235	-0.85239
P60228	EIF3E	2.63118	2.26577	0.00542288	0.0894436	1.39571			5.47319	+	EIF3S6 INT6	Eukaryotic translation initiation factor 3 subunit E OS=Homo sapiens OX=9606 GN=EIF3E PE=1 SV=1	0	30.031	16	6	115	6	445	52.2	6.04	60.18	6	0	1.91947	1.92021	2.46659	2.28444	2.55264	2.65304	0.43915	0.635334	1.04465
P31040	SDHA	1.13708	0.186746	0.65051	0.837405	0.185331			0.488896		SDH2 SDHF	Succinate dehydrogenase [ubiquinone] flavoprotein subunit, mitochondrial OS=Homo sapiens OX=9606 GN=SDHA PE=1 SV=2	0	30.019	17	8	63	8	664	72.6	7.39	20.6	8	0	-1.78811	-2.14631	-1.85663	-3.07967	-1.97376	-1.95977	-1.70214	-2.83888	-1.80604
P52789	HK2	0.430384	0.50828	0.310256	0.542545	-1.2163			-1.16086			Hexokinase-2 OS=Homo sapiens OX=9606 GN=HK2 PE=1 SV=2	0	30.012	12	9	65	8	917	102.3	6.05	19.65	9	0	-4.30014	-1.49802	-1.69298	-4.02392	-1.34662	-1.35504	-0.717012	-2.34183	-0.783382
P37173	TGFBR2	1.21117	0.313565	0.485775	0.706171	0.276403			0.767137			TGF-beta receptor type-2 OS=Homo sapiens OX=9606 GN=TGFBR2 PE=1 SV=2	0	29.979	13	7	116	7	567	64.5	5.9	37.32	7	0	1.32584	1.03881	0.481189	1.60971	0.542518	1.62874	0.351815	0.474621	1.19019
P62714	PPP2CB	0.786235	1.51997	0.0302018	0.11779	-0.346967			-3.29048			Serine/threonine-protein phosphatase 2A catalytic subunit beta isoform OS=Homo sapiens OX=9606 GN=PPP2CB PE=1 SV=1	0	29.96	24	6	151	4	309	35.6	5.43	79.05	6	2	1.39154	1.46439	1.47822	1.57209	1.6487	1.59345	1.65477	1.99102	1.72926
P67775	PPP2CA	0.786235	1.51997	0.0302018	0.117534	-0.346967			-3.29048			Serine/threonine-protein phosphatase 2A catalytic subunit alpha isoform OS=Homo sapiens OX=9606 GN=PPP2CA PE=1 SV=1	0	29.96	24	6	151	4	309	35.6	5.54	79.05	6	0	1.39154	1.46439	1.47822	1.57209	1.6487	1.59345	1.65477	1.99102	1.72926
Q8IV08	PLD3	1.42342	0.412754	0.386586	0.617209	0.50936			0.97088			5'-3' exonuclease PLD3 OS=Homo sapiens OX=9606 GN=PLD3 PE=1 SV=1	0	29.96	16	7	98	7	490	54.7	6.47	43.59	7	0	0.983202	0.305985	0.435113	1.28401	1.26931	1.02714	0.524925	-0.897894	0.569189
Q9H6Y2	WDR55	0.657542	0.436709	0.36584	0.601979	-0.604846			-1.01895			WD repeat-containing protein 55 OS=Homo sapiens OX=9606 GN=WDR55 PE=1 SV=2	0	29.958	23	6	50	6	383	42	4.92	17.34	6	0	-1.53996	-0.687253	-2.10224	-0.160382	-0.599557	-0.593599	-1.69419	-0.400939	-0.419785
P06737	PYGL	0.454191	0.951445	0.111829	0.256165	-1.13863			-2.03301			Glycogen phosphorylase, liver form OS=Homo sapiens OX=9606 GN=PYGL PE=1 SV=4	0	29.942	12	9	133	7	847	97.1	7.17	54.37	9	1	0.844475	0.830702	1.15948	3.13766	2.86247	3.05124	2.83382	1.01249	2.40424
O15226	NKRF	0.378287	0.621388	0.239118	0.440274	-1.40245			-1.38206		ITBA4 NRF	NF-kappa-B-repressing factor OS=Homo sapiens OX=9606 GN=NKRF PE=1 SV=2	0	29.91	12	8	132	8	690	77.6	8.79	47.25	8	0	-4.07184	-1.1711	-4.3407	-0.96574	-1.3207	-3.52723	-1.80992	-1.7931	-1.77327
Q58EX7	PLEKHG4	0.890645	0.460893	0.346025	0.581247	-0.167078			-1.06716		PRTPHN1	Puratrophin-1 OS=Homo sapiens OX=9606 GN=PLEKHG4 PE=1 SV=1	0	29.902	10	8	70	8	1191	130.7	5.64	28.63	8	0	0.0636482	-0.283019	0.0021108	-1.00547	-0.189813	-0.438808	0.0692556	0.304441	-0.0897217
Q4G0J3	LARP7	0.976165	0.0568974	0.877208	0.941847	-0.0348025			-0.164646			La-related protein 7 OS=Homo sapiens OX=9606 GN=LARP7 PE=1 SV=1	0	29.895	23	9	56	9	582	66.9	9.55	11.89	9	0	4.27725	4.16416	4.13831	3.72705	3.57171	3.80607	4.57737	3.86087	4.24589
O14893	GEMIN2	1.12847	0.810287	0.154779	0.325232	0.174374			1.75131		SIP1	Gem-associated protein 2 OS=Homo sapiens OX=9606 GN=GEMIN2 PE=1 SV=1	0	29.832	22	6	68	6	280	31.6	5.58	27.42	6	0	0.737742	0.604793	0.503281	-0.65008	-0.584507	-0.564948	0.475143	0.546399	0.301153
Q9BTW9	TBCD	0.88244	0.287845	0.515412	0.730254	-0.180431			-0.712679		KIAA0988 SSD1 TFCD	Tubulin-specific chaperone D OS=Homo sapiens OX=9606 GN=TBCD PE=1 SV=2	0	29.829	9	7	66	7	1192	132.5	6.19	20.21	7	0	-1.15487	-0.581965	-0.569345	-0.344538	-0.807565	-0.374667	-0.785389	-0.71621	-0.263288
Q66K14	TBC1D9B	1.05025	0.0459189	0.899665	0.953251	0.0707274			0.134281		KIAA0676	TBC1 domain family member 9B OS=Homo sapiens OX=9606 GN=TBC1D9B PE=1 SV=3	0	29.82	8	8	63	8	1250	140.4	5.25	23.06	8	0	-1.54883	-1.24422	-0.632739	-0.436535	-0.357608	-0.297297	-0.759538	-2.11791	-0.760519
Q01581	HMGCS1	1.1219	0.495858	0.319258	0.55395	0.165947			1.13638		HMGCS	Hydroxymethylglutaryl-CoA synthase, cytoplasmic OS=Homo sapiens OX=9606 GN=HMGCS1 PE=1 SV=2	0	29.81	18	8	155	8	520	57.3	5.41	60.61	8	0	1.16281	1.42239	1.2319	0.875799	1.29924	1.18065	0.860267	1.20805	1.25093
Q9NY93	DDX56	0.896736	0.311258	0.488362	0.708321	-0.157245			-0.762284		DDX21 NOH61	Probable ATP-dependent RNA helicase DDX56 OS=Homo sapiens OX=9606 GN=DDX56 PE=1 SV=1	0	29.718	19	8	76	8	547	61.6	9.26	31.52	8	0	-0.154128	-0.203682	-0.670629	-1.20517	-0.669609	-1.18493	-0.0528803	-0.0695924	-0.434231
P36915	GNL1	0.754229	2.41392	0.0038555	0.0874851	-0.406925			-6.01145		HSR1	Guanine nucleotide-binding protein-like 1 OS=Homo sapiens OX=9606 GN=GNL1 PE=1 SV=2	0	29.706	19	9	86	9	607	68.6	5.8	34.81	9	0	-0.0347675	-0.0877622	0.0628077	-0.298222	-0.0900615	-0.0546556	0.311549	0.485096	0.364407
P31942	HNRNPH3	0.617168	1.73415	0.0184437	0.106545	-0.696265			-3.841		HNRPH3	Heterogeneous nuclear ribonucleoprotein H3 OS=Homo sapiens OX=9606 GN=HNRNPH3 PE=1 SV=2	0	29.702	24	7	281	6	346	36.9	6.87	140.94	7	0	3.38445	3.26292	3.59186	3.87917	3.92443	4.22418	4.13643	4.36105	3.83054
P42566	EPS15	1.06565	0.0974225	0.799057	0.903215	0.0917389			0.272039		AF1P	Epidermal growth factor receptor substrate 15 OS=Homo sapiens OX=9606 GN=EPS15 PE=1 SV=2	0	29.695	11	8	62	8	896	98.6	4.64	25.62	8	0	-0.672845	-0.31003	-0.171652	-0.215964	-0.181921	-0.734886	0.127064	-0.808052	-0.748756
P16989	YBX3	1.41093	1.2114	0.0614608	0.173926	0.496643			2.57794		CSDA DBPA	Y-box-binding protein 3 OS=Homo sapiens OX=9606 GN=YBX3 PE=1 SV=4	0	29.691	16	6	192	2	372	40.1	9.77	92.98	6	0	-0.913121	-1.04323	-0.929158	-0.83403	-1.50125	-1.34047	-1.16732	-1.81077	-1.39735
O00148	DDX39A	0.849433	1.29282	0.0509536	0.161492	-0.235428			-2.75801		DDX39	ATP-dependent RNA helicase DDX39A OS=Homo sapiens OX=9606 GN=DDX39A PE=1 SV=2	0	29.66	15	6	176	2	427	49.1	5.68	83.76	6	4	2.41192	2.51803	2.62561	2.18097	2.36041	2.4697	2.84088	2.77959	2.64138
Q9H0U3	MAGT1	1.14212	0.422274	0.378204	0.608531	0.191709			0.990028		IAG2	Magnesium transporter protein 1 OS=Homo sapiens OX=9606 GN=MAGT1 PE=1 SV=1	0	29.61	16	7	126	7	335	38	9.63	56.38	7	0	2.67206	2.63492	2.37209	2.38328	2.24804	2.38951	2.66091	2.07525	2.36779
P20839	IMPDH1	1.02128	0.0597088	0.871548	0.941518	0.0303833			0.172328		IMPD1	Inosine-5'-monophosphate dehydrogenase 1 OS=Homo sapiens OX=9606 GN=IMPDH1 PE=1 SV=2	0	29.566	19	8	125	6	514	55.4	6.9	58.11	8	0	-1.257	-1.25772	-0.869763	-1.29698	-2.12674	-1.35037	-1.3018	-1.25362	-0.920221
Q9UJU6	DBNL	0.701167	2.62705	0.00236022	0.0798286	-0.51217			-6.86318	+	CMAP SH3P7	Drebrin-like protein OS=Homo sapiens OX=9606 GN=DBNL PE=1 SV=1	0	29.566	21	8	61	8	430	48.2	5.05	25.47	8	0	0.581738	0.435247	0.681774	0.812583	1.24943	0.865178	1.06305	1.05211	1.12011
P62879	GNB2	0.996917	0.0129441	0.970635	0.983597	-0.00445404			-0.0391659			Guanine nucleotide-binding protein G(I)/G(S)/G(T) subunit beta-2 OS=Homo sapiens OX=9606 GN=GNB2 PE=1 SV=3	0	29.562	20	7	275	2	340	37.3	6	143.41	7	0	0.316349	0.494244	0.265294	0.414068	0.473637	0.519325	0.542194	0.256428	0.290627
Q8IYB3	SRRM1	1.20011	0.125971	0.74822	0.884771	0.263169			0.343927		SRM160	Serine/arginine repetitive matrix protein 1 OS=Homo sapiens OX=9606 GN=SRRM1 PE=1 SV=2	0	29.47	9	7	58	7	904	102.3	11.84	14.09	7	0	-0.530826	-0.658295	-2.41493	-3.045	-3.71225	-3.34892	-1.20058	-0.824696	-2.36828
P78362	SRPK2	1.04944	0.404967	0.39358	0.625633	0.0696244			0.955173			SRSF protein kinase 2 OS=Homo sapiens OX=9606 GN=SRPK2 PE=1 SV=3	0	29.446	15	8	69	7	688	77.5	4.97	20.7	8	0	-0.584698	-0.695515	-0.564367	-0.613551	-0.454947	-0.744924	-0.704164	-0.571363	-0.777926
P07384	CAPN1	2.09151	0.762428	0.172811	0.352216	1.06455			1.65724		CANPL1	Calpain-1 catalytic subunit OS=Homo sapiens OX=9606 GN=CAPN1 PE=1 SV=1	0	29.349	13	8	93	8	714	81.8	5.67	36.49	8	0	0.193924	0.669026	0.976301	0.00750454	0.659637	0.467289	-1.65	0.0761524	0.219461
P45974	USP5	1.60721	1.78981	0.0162251	0.103922	0.68456			3.99294		ISOT	Ubiquitin carboxyl-terminal hydrolase 5 OS=Homo sapiens OX=9606 GN=USP5 PE=1 SV=2	0	29.252	13	7	86	7	858	95.7	5.03	38.25	7	0	0.532076	1.07884	0.727529	-0.395791	-0.812216	-0.725182	0.0263219	0.0404281	0.21802
Q6IBW4	NCAPH2	1.25055	0.897867	0.126512	0.27947	0.322557			1.9252		CAPH2	Condensin-2 complex subunit H2 OS=Homo sapiens OX=9606 GN=NCAPH2 PE=1 SV=1	0	29.244	11	7	76	7	605	68.2	4.74	30.64	7	0	0.895756	1.21613	1.28294	0.570044	0.515081	0.763486	0.920006	0.574288	0.932866
P09661	SNRPA1	0.931347	0.110865	0.774703	0.890491	-0.10261			-0.306235			U2 small nuclear ribonucleoprotein A' OS=Homo sapiens OX=9606 GN=SNRPA1 PE=1 SV=2	0	29.222	36	8	108	8	255	28.4	8.62	44.94	8	0	0.166092	0.306254	1.0455	0.23981	0.617761	0.198211	0.420249	0.997616	0.407814
Q9H4A4	RNPEP	0.676208	0.193281	0.640794	0.830221	-0.564462			-0.503938		APB	Aminopeptidase B OS=Homo sapiens OX=9606 GN=RNPEP PE=1 SV=2	0	29.221	16	8	91	8	650	72.5	5.74	34.12	8	0	-2.90478	0.628001	0.14918	-3.03164	-1.85079	-1.80765	0.0606625	-0.491341	-0.00353432
P82912	MRPS11	0.866702	0.297916	0.503598	0.719699	-0.206392			-0.7341		RPMS11	Small ribosomal subunit protein uS11m OS=Homo sapiens OX=9606 GN=MRPS11 PE=1 SV=2	0	29.212	29	4	68	4	194	20.6	10.81	21.92	4	0	0.231358	0.78432	0.846878	-1.16031	-1.28782	-1.02794	1.21677	0.539859	0.725101
Q96RT1	ERBIN	0.55034	0.43717	0.365452	0.604853	-0.861605			-1.01988		ERBB2IP KIAA1225 LAP2	Erbin OS=Homo sapiens OX=9606 GN=ERBIN PE=1 SV=2	0	29.192	9	9	81	9	1412	158.2	5.5	25.69	9	0	-0.79648	-2.4485	-2.19737	-0.853414	-0.625838	-1.07031	-0.348565	-2.29136	-0.217613
O15357	INPPL1	0.471277	1.3679	0.0428652	0.144608	-1.08535			-2.9288		SHIP2	Phosphatidylinositol 3,4,5-trisphosphate 5-phosphatase 2 OS=Homo sapiens OX=9606 GN=INPPL1 PE=1 SV=2	0	29.108	10	10	89	10	1258	138.5	6.54	21.6	10	0	-0.985149	-1.00049	0.0938021	-0.0408332	-0.831305	-0.0602491	0.534961	0.530888	0.298363
P49792	RANBP2	0.872585	0.337826	0.459382	0.683526	-0.196633			-0.817809		NUP358	E3 SUMO-protein ligase RanBP2 OS=Homo sapiens OX=9606 GN=RANBP2 PE=1 SV=2	0	29.098	4	9	42	9	3224	358	6.2	11.78	9	0	-1.99892	-1.54703	-1.32319	-0.898864	-1.67859	-1.75546	-1.52074	-1.59895	-1.15955
Q9NZI8	IGF2BP1	0.983313	0.067262	0.856521	0.935499	-0.0242779			-0.192784		CRDBP VICKZ1 ZBP1	Insulin-like growth factor 2 mRNA-binding protein 1 OS=Homo sapiens OX=9606 GN=IGF2BP1 PE=1 SV=2	0	29.058	15	7	79	6	577	63.4	9.2	26.28	7	0	-0.173876	-0.416891	-0.595719	0.211335	0.245527	-0.152536	-0.329038	-0.35473	-0.429884
P23634	ATP2B4	1.14313	0.47241	0.336969	0.57254	0.192993			1.09002		ATP2B2 MXRA1	Plasma membrane calcium-transporting ATPase 4 OS=Homo sapiens OX=9606 GN=ATP2B4 PE=1 SV=2	0	29.057	10	10	66	5	1241	137.8	6.6	22.93	10	2	-0.454484	-0.888697	-0.781614	0.0574439	0.14539	0.0433623	-0.735681	-1.13342	-0.834673
Q8TD47	RPS4Y2	1.12412	0.229962	0.588895	0.794658	0.168794			0.58674		RPS4Y2P	Small ribosomal subunit protein eS4, Y isoform 2 OS=Homo sapiens OX=9606 GN=RPS4Y2 PE=2 SV=3	0	29.024	24	7	313	7	263	29.3	10.08	165.02	7	0	5.55257	5.39254	5.30573	5.15633	4.90176	5.11898	5.7668	4.81316	5.1645
Q12986	NFX1	1.93349	0.75663	0.175134	0.356973	0.951207			1.64588		NFX2	Transcriptional repressor NF-X1 OS=Homo sapiens OX=9606 GN=NFX1 PE=1 SV=2	0	28.971	9	8	50	8	1120	124.3	8.24	17.33	8	0	-2.87497	-3.51678	-2.1419	-3.27578	-4.56076	-2.10193	-4.6345	-3.34266	-3.41011
Q9BT67	NDFIP1	0.888216	0.289445	0.513518	0.728703	-0.171017			-0.716089		N4WBP5	NEDD4 family-interacting protein 1 OS=Homo sapiens OX=9606 GN=NDFIP1 PE=1 SV=1	0	28.938	30	6	128	6	221	24.9	4.68	60.89	6	0	1.81449	1.50253	2.16495	0.909392	1.49248	1.4299	1.98997	1.75508	2.24997
P50402	EMD	0.721884	1.24113	0.0573947	0.169492	-0.47016			-2.64309		EDMD STA	Emerin OS=Homo sapiens OX=9606 GN=EMD PE=1 SV=1	0	28.906	32	7	146	7	254	29	5.5	56.26	7	0	-1.7345	-1.35939	-1.26206	-2.07087	-2.40187	-2.13772	-1.17806	-0.945493	-0.821932
O60678	PRMT3	0.830064	1.37428	0.0422399	0.144757	-0.268706			-2.94354		HRMT1L3	Protein arginine N-methyltransferase 3 OS=Homo sapiens OX=9606 GN=PRMT3 PE=1 SV=4	0	28.863	15	7	112	7	531	59.9	5.35	38.22	7	0	1.11173	0.854193	1.12829	0.987167	1.10487	1.03267	1.33284	1.30771	1.25978
P00367	GLUD1	1.77252	1.02098	0.0952848	0.227647	0.825798			2.17491		GLUD	Glutamate dehydrogenase 1, mitochondrial OS=Homo sapiens OX=9606 GN=GLUD1 PE=1 SV=2	0	28.848	18	8	82	8	558	61.4	7.8	37.08	8	0	-0.177004	-0.0217626	-0.0395248	-0.231384	-1.05951	-1.94335	-0.475442	-1.6556	-0.584639
Q96G74	OTUD5	0.472901	2.19323	0.00640872	0.0876556	-1.08039			-5.22427	+		OTU domain-containing protein 5 OS=Homo sapiens OX=9606 GN=OTUD5 PE=1 SV=1	0	28.795	14	6	44	6	571	60.6	6.54	26.55	6	0	0.900679	0.658312	1.09523	-0.212699	0.32705	0.0809026	1.74453	2.28492	1.86593
P41273	TNFSF9	1.43167	0.716187	0.192227	0.381907	0.5177			1.5668			Tumor necrosis factor ligand superfamily member 9 OS=Homo sapiens OX=9606 GN=TNFSF9 PE=1 SV=1	0	28.779	39	7	109	7	254	26.6	7.02	47.34	7	0	1.25253	1.17077	0.749443	1.85234	1.81738	1.75673	1.03831	0.0292791	0.552058
Q92673	SORL1	0.828693	0.173879	0.670071	0.845754	-0.271091			-0.458997		C11orf32	Sortilin-related receptor OS=Homo sapiens OX=9606 GN=SORL1 PE=1 SV=2	0	28.756	5	9	59	9	2214	248.3	5.55	14.85	9	0	-1.10281	-2.12252	-2.0195	-2.06738	-1.93805	-2.23652	-2.07594	-1.85786	-0.497746
P13797	PLS3	0.865214	0.0594843	0.871998	0.939931	-0.208872			-0.171716			Plastin-3 OS=Homo sapiens OX=9606 GN=PLS3 PE=1 SV=4	0	28.67	14	8	77	7	630	70.8	5.6	25.09	8	0	-0.454058	0.0239151	-3.63007	-0.455762	-0.307996	-0.0749901	-1.73602	-1.3303	-0.367279
O00712	NFIB	0.914021	0.346097	0.450716	0.67689	-0.129701			-0.834943			Nuclear factor 1 B-type OS=Homo sapiens OX=9606 GN=NFIB PE=1 SV=2	0	28.606	22	7	116	5	420	47.4	8.87	51.4	7	0	0.0360241	0.122427	0.508968	-0.376846	-0.487172	-0.483759	0.381627	0.42864	0.246256
Q92562	FIG4	1.11157	0.682782	0.207595	0.402789	0.152601			1.50165		KIAA0274 SAC3	Polyphosphoinositide phosphatase OS=Homo sapiens OX=9606 GN=FIG4 PE=1 SV=1	0	28.576	11	9	84	9	907	103.6	6.92	28.9	9	0	0.190405	0.188124	0.451296	0.244287	0.444582	0.28895	0.0792825	0.0651728	0.227566
P05362	ICAM1	0.922693	0.461549	0.345503	0.581046	-0.116077			-1.06847			Intercellular adhesion molecule 1 OS=Homo sapiens OX=9606 GN=ICAM1 PE=1 SV=2	0	28.562	17	8	106	8	532	57.8	7.99	53.58	8	0	0.471453	0.42031	0.267066	1.34192	1.31083	1.43966	0.330205	0.545199	0.631656
P61026	RAB10	1.20138	0.339527	0.457586	0.681934	0.264694			0.821338			Ras-related protein Rab-10 OS=Homo sapiens OX=9606 GN=RAB10 PE=1 SV=1	0	28.488	32	6	96	6	200	22.5	8.38	46.07	6	0	-0.0851579	0.789198	0.546393	0.99447	1.09673	1.10826	0.529842	-0.0659376	-0.0075531
Q9Y2U8	LEMD3	0.927742	0.245169	0.568632	0.775333	-0.108205			-0.620336		MAN1	Inner nuclear membrane protein Man1 OS=Homo sapiens OX=9606 GN=LEMD3 PE=1 SV=2	0	28.488	11	8	60	8	911	99.9	7.55	16.4	8	0	-1.22025	-0.951324	-1.28449	-1.4616	-2.84427	-2.42989	-1.04863	-0.796425	-1.2864
Q96CV9	OPTN	1.79632	0.427119	0.374008	0.605821	0.845047			0.99975		FIP2 GLC1E HIP7 HYPL NRP	Optineurin OS=Homo sapiens OX=9606 GN=OPTN PE=1 SV=3	0	28.469	13	8	74	8	577	65.9	5.17	18.94	8	0	-1.19694	-1.65929	-1.54726	-0.816612	-1.04264	-1.10042	-1.45962	-3.98014	-1.49887
Q8TDW0	LRRC8C	1.35612	0.781885	0.16524	0.340792	0.439487			1.69542		AD158 FAD158	Volume-regulated anion channel subunit LRRC8C OS=Homo sapiens OX=9606 GN=LRRC8C PE=1 SV=2	0	28.457	12	8	60	8	803	92.4	7.62	16.51	8	0	-1.35144	-0.962515	-0.780549	-1.27621	-0.916423	-1.39785	-1.55761	-1.76071	-1.09465
O95758	PTBP3	1.57017	1.08103	0.0829785	0.208355	0.650919			2.29957		ROD1	Polypyrimidine tract-binding protein 3 OS=Homo sapiens OX=9606 GN=PTBP3 PE=1 SV=2	0	28.451	17	7	101	6	552	59.7	9.04	42.36	7	0	0.516251	0.63619	0.776299	0.552385	0.695324	0.387125	-0.551079	0.216248	0.310813
Q14103	HNRNPD	1.12155	0.396885	0.400973	0.634095	0.165498			0.938828		AUF1 HNRPD	Heterogeneous nuclear ribonucleoprotein D0 OS=Homo sapiens OX=9606 GN=HNRNPD PE=1 SV=1	0	28.413	20	7	111	6	355	38.4	7.81	42.39	7	0	0.850826	0.93177	0.604475	0.661905	0.319591	0.325944	0.362393	0.865962	0.662222
Q96CS3	FAF2	1.28741	0.500803	0.315644	0.549038	0.364466			1.14614		ETEA KIAA0887 UBXD8 UBXN3B	FAS-associated factor 2 OS=Homo sapiens OX=9606 GN=FAF2 PE=1 SV=2	0	28.396	15	5	108	5	445	52.6	5.62	45.54	5	0	4.79239	4.57176	4.92094	1.02075	4.9788	5.17702	4.7926	3.80592	4.59316
P19438	TNFRSF1A	1.57837	1.34623	0.0450574	0.147108	0.658435			2.87902		TNFAR TNFR1	Tumor necrosis factor receptor superfamily member 1A OS=Homo sapiens OX=9606 GN=TNFRSF1A PE=1 SV=1	0	28.393	23	8	70	8	455	50.5	6.64	23.22	8	0	0.616043	0.483262	0.107884	0.0610302	0.447976	0.308435	-0.120843	-0.0520798	-0.595192
Q7Z5K2	WAPL	0.628096	1.45181	0.0353341	0.129256	-0.670942			-3.12563		FOE KIAA0261 WAPAL	Wings apart-like protein homolog OS=Homo sapiens OX=9606 GN=WAPL PE=1 SV=1	0	28.384	9	8	109	8	1190	132.9	5.44	39.36	8	0	-0.339041	-0.64692	-0.147222	-1.30332	-1.7421	-0.978405	0.0933911	0.604646	0.181606
Q15691	MAPRE1	0.971096	0.0636801	0.863615	0.938713	-0.0423141			-0.183115			Microtubule-associated protein RP/EB family member 1 OS=Homo sapiens OX=9606 GN=MAPRE1 PE=1 SV=3	0	28.354	38	7	98	6	268	30	5.14	38.86	7	1	1.41655	2.01009	2.01888	1.35899	0.984115	1.0264	1.70565	2.08737	1.77944
Q9UGP4	LIMD1	0.982369	0.0398104	0.912409	0.959661	-0.0256626			-0.117121			LIM domain-containing protein 1 OS=Homo sapiens OX=9606 GN=LIMD1 PE=1 SV=1	0	28.331	18	8	54	8	676	72.1	6.65	24.54	8	0	2.90043	3.33331	3.20686	3.15537	3.14588	3.27301	3.51088	2.9105	3.09621
O95757	HSPA4L	2.43167	0.616296	0.241938	0.444804	1.28195			1.37214		APG1 OSP94	Heat shock 70 kDa protein 4L OS=Homo sapiens OX=9606 GN=HSPA4L PE=1 SV=3	0	28.322	11	7	77	5	839	94.5	5.88	27.12	7	0	-2.21493	-0.843246	-1.09352	-1.14024	-1.45544	-1.00761	-1.37148	-2.40285	-4.22319
Q9NRX1	PNO1	0.985038	0.0674298	0.85619	0.935633	-0.0217483			-0.193235			RNA-binding protein PNO1 OS=Homo sapiens OX=9606 GN=PNO1 PE=1 SV=1	0	28.32	41	7	94	7	252	27.9	9.73	40.15	7	0	1.08271	1.15922	1.25129	0.106805	0.161564	0.199533	1.38849	1.07188	1.0981
P51531	SMARCA2	0.935118	0.169145	0.677416	0.84846	-0.0967792			-0.447896		BAF190B BRM SNF2A SNF2L2	Probable global transcription activator SNF2L2 OS=Homo sapiens OX=9606 GN=SMARCA2 PE=1 SV=2	0	28.234	5	7	136	7	1590	181.2	7.2	62.1	7	0	0.631222	0.313257	0.398861	-0.752182	-0.480666	-0.2036	0.787733	0.16097	0.684974
Q9NZ01	TECR	1.05679	0.195103	0.638113	0.829493	0.0796856			0.508114		GPSN2 SC2	Very-long-chain enoyl-CoA reductase OS=Homo sapiens OX=9606 GN=TECR PE=1 SV=1	0	28.233	17	6	183	6	308	36	9.45	98.12	6	0	3.20636	2.94573	3.27106	2.6631	2.7885	2.75009	3.24134	2.83055	3.11221
Q9NXR1	NDE1	0.708059	1.47537	0.0334682	0.12507	-0.498058			-3.18209		NUDE	Nuclear distribution protein nudE homolog 1 OS=Homo sapiens OX=9606 GN=NDE1 PE=1 SV=3	0	28.215	26	7	59	5	335	37.7	5.15	24.32	7	2	0.690237	0.70022	1.10719	0.518368	0.60294	0.742495	1.23202	1.47793	1.28188
P62826	RAN	0.937753	0.356223	0.440328	0.667353	-0.09272			-0.855834		ARA24	GTP-binding nuclear protein Ran OS=Homo sapiens OX=9606 GN=RAN PE=1 SV=3	0	28.209	31	7	188	7	216	24.4	7.49	106.24	7	0	2.97148	3.13343	2.94948	2.71575	2.79909	2.94666	3.25178	2.93927	3.1415
Q92508	PIEZO1	0.603586	1.35088	0.0445777	0.146784	-0.728368			-2.88967		FAM38A KIAA0233	Piezo-type mechanosensitive ion channel component 1 OS=Homo sapiens OX=9606 GN=PIEZO1 PE=1 SV=4	0	28.188	4	8	49	8	2521	286.6	7.47	9.97	8	0	-1.63109	-1.83988	-1.22563	-0.25315	-0.411222	-0.632433	-1.06407	-0.490396	-0.957033
P46977	STT3A	0.965096	0.146828	0.713136	0.866145	-0.0512553			-0.394803		ITM1 TMC	Dolichyl-diphosphooligosaccharide--protein glycosyltransferase subunit STT3A OS=Homo sapiens OX=9606 GN=STT3A PE=1 SV=2	0	28.182	14	8	68	8	705	80.5	8.07	26.6	8	0	1.17877	1.13381	0.873504	1.11685	1.39282	1.38554	0.941137	1.16506	1.23365
Q9HBD1	RC3H2	0.795468	0.431238	0.370477	0.605162	-0.330125			-1.00801		MNAB RNF164	Roquin-2 OS=Homo sapiens OX=9606 GN=RC3H2 PE=1 SV=2	0	28.155	9	8	56	7	1191	131.6	6.89	18.13	8	0	-1.42975	-1.60197	-0.813022	-0.832543	-0.833385	-1.58339	-1.38086	-0.629944	-0.843563
Q9HAU0	PLEKHA5	0.872366	0.5152	0.305351	0.53673	-0.196995			-1.17448		KIAA1686 PEPP2	Pleckstrin homology domain-containing family A member 5 OS=Homo sapiens OX=9606 GN=PLEKHA5 PE=1 SV=1	0	28.131	8	8	80	8	1116	127.4	7.53	28.96	8	0	-0.363599	-0.362	-0.0871036	-0.603325	-0.52578	-0.928093	0.064463	0.0683415	-0.354523
Q9BVI4	NOC4L	1.89337	2.87165	0.00134386	0.0778605	0.920959			7.96858	+		Nucleolar complex protein 4 homolog OS=Homo sapiens OX=9606 GN=NOC4L PE=1 SV=1	0	28.113	17	6	47	6	516	58.4	7.49	16.48	6	0	-2.06095	-1.71921	-1.93596	-2.59732	-2.50837	-2.21878	-2.89468	-2.71049	-2.87383
Q96MU7	YTHDC1	1.06101	0.0432535	0.905204	0.955864	0.0854395			0.126818		KIAA1966 YT521	YTH domain-containing protein 1 OS=Homo sapiens OX=9606 GN=YTHDC1 PE=1 SV=3	0	28.067	13	8	50	8	727	84.6	6.23	15.91	8	0	-0.94512	-2.3873	-1.06031	-0.710571	-1.73604	-2.37488	-2.47994	-0.81939	-1.34971
Q8IYD1	GSPT2	1.03959	0.136562	0.730193	0.875736	0.0560108			0.369924		ERF3B	Eukaryotic peptide chain release factor GTP-binding subunit ERF3B OS=Homo sapiens OX=9606 GN=GSPT2 PE=1 SV=2	0	28.062	12	6	105	6	628	68.8	5.43	40.94	6	0	1.22241	1.42868	1.37265	1.52601	1.30482	1.09386	1.56183	1.14225	1.15163
P10644	PRKAR1A	1.313	0.609533	0.245735	0.450786	0.392869			1.35896		PKR1 PRKAR1 TSE1	cAMP-dependent protein kinase type I-alpha regulatory subunit OS=Homo sapiens OX=9606 GN=PRKAR1A PE=1 SV=1	0	28.054	18	6	140	6	381	43	5.35	59.94	6	0	0.927128	1.037	0.502331	0.982509	1.02587	0.858469	0.461684	0.000524702	0.825648
P47895	ALDH1A3	0.794656	0.190922	0.644286	0.831562	-0.331598			-0.498518		ALDH6	Retinaldehyde dehydrogenase 3 OS=Homo sapiens OX=9606 GN=ALDH1A3 PE=1 SV=2	0	28.041	16	7	116	7	512	56.1	7.25	42.15	7	0	-1.61338	0.0238962	-0.226981	-2.03313	-2.83701	-1.63543	-1.12372	0.240836	0.0612142
Q12874	SF3A3	2.21793	3.15742	0.000695952	0.079	1.14922			9.46185	+	SAP61	Splicing factor 3A subunit 3 OS=Homo sapiens OX=9606 GN=SF3A3 PE=1 SV=1	0	28.006	12	6	83	6	501	58.8	5.38	37.41	6	0	0.51758	0.69194	0.874839	1.22353	0.742947	0.952182	-0.327904	-0.499395	-0.535992
P41743	PRKCI	1.28622	0.368446	0.428109	0.661808	0.363137			0.880924		DXS1179E	Protein kinase C iota type OS=Homo sapiens OX=9606 GN=PRKCI PE=1 SV=2	0	27.963	20	7	74	7	596	68.2	5.85	28.37	7	0	-1.36442	-0.273765	-1.30787	-0.0261992	-0.0765619	-0.304354	-0.973394	-1.70165	-1.36042
Q2TAZ0	ATG2A	0.942591	0.199874	0.631141	0.82428	-0.0852963			-0.519019		KIAA0404	Autophagy-related protein 2 homolog A OS=Homo sapiens OX=9606 GN=ATG2A PE=1 SV=3	0	27.958	6	8	44	8	1938	212.7	5.88	11.3	8	0	-1.32369	-1.46445	-0.986047	-1.26956	-0.983534	-1.13411	-1.10353	-1.3377	-1.07708
Q9H0G5	NSRP1	0.712981	1.44028	0.0362845	0.128992	-0.488065			-3.0982		CCDC55 NSRP70	Nuclear speckle splicing regulatory protein 1 OS=Homo sapiens OX=9606 GN=NSRP1 PE=1 SV=1	0	27.909	14	7	55	7	558	66.4	8.84	17.85	7	0	-0.798236	-0.990021	-0.881439	-1.12452	-1.30077	-1.21522	-0.675087	-0.169293	-0.361122
Q01804	OTUD4	0.917685	0.558712	0.276241	0.497063	-0.123929			-1.25978		HIN-1 KIAA1046	OTU domain-containing protein 4 OS=Homo sapiens OX=9606 GN=OTUD4 PE=1 SV=4	0	27.897	10	8	65	8	1114	124	6.71	17.16	8	0	0.0492516	0.0744197	0.259566	-1.03469	-0.429742	-0.323394	0.10911	0.347401	0.298513
O43809	NUDT21	0.848683	0.433544	0.368516	0.603796	-0.236702			-1.01262		CFIM25 CPSF25 CPSF5	Cleavage and polyadenylation specificity factor subunit 5 OS=Homo sapiens OX=9606 GN=NUDT21 PE=1 SV=1	0	27.894	28	5	158	5	227	26.2	8.82	65.88	5	0	1.95655	1.68062	2.1983	1.72373	1.84242	1.6654	2.04872	2.53744	1.95942
Q10469	MGAT2	0.899518	0.292098	0.51039	0.726582	-0.152775			-0.721739			Alpha-1,6-mannosyl-glycoprotein 2-beta-N-acetylglucosaminyltransferase OS=Homo sapiens OX=9606 GN=MGAT2 PE=1 SV=1	0	27.877	19	7	108	7	447	51.5	8.76	35.3	7	0	-1.70551	-1.73944	-1.62785	-1.27207	-1.29417	-1.32924	-1.92997	-1.21573	-1.46877
O00165	HAX1	1.56756	1.31315	0.0486235	0.159391	0.648516			2.80379		HS1BP1	HCLS1-associated protein X-1 OS=Homo sapiens OX=9606 GN=HAX1 PE=1 SV=2	0	27.854	36	7	58	7	279	31.6	4.92	16.97	7	0	-0.546111	-0.600102	-0.735863	-0.938077	-0.892718	-0.988728	-0.941754	-1.70219	-1.18368
Q7KZI7	MARK2	0.966204	0.153513	0.702242	0.862776	-0.0496007			-0.410846		EMK1	Serine/threonine-protein kinase MARK2 OS=Homo sapiens OX=9606 GN=MARK2 PE=1 SV=2	0	27.834	12	8	93	6	788	87.9	9.72	38.99	8	2	1.00074	0.910482	1.15154	0.0981771	0.455807	0.261905	1.26603	0.957737	0.9878
O00154	ACOT7	1.01181	0.0551663	0.880712	0.944037	0.0169373			0.159897		BACH	Cytosolic acyl coenzyme A thioester hydrolase OS=Homo sapiens OX=9606 GN=ACOT7 PE=1 SV=3	0	27.829	16	6	89	6	380	41.8	8.54	25.96	6	0	-1.39636	-1.14231	-1.12585	-1.67562	-1.13851	-0.702711	-1.234	-1.34386	-1.13748
O60884	DNAJA2	0.88167	0.624492	0.237415	0.439918	-0.18169			-1.38811		CPR3 HIRIP4	DnaJ homolog subfamily A member 2 OS=Homo sapiens OX=9606 GN=DNAJA2 PE=1 SV=1	0	27.824	21	7	200	7	412	45.7	6.48	83.38	7	0	2.23399	2.45467	2.58988	2.22195	2.2347	2.39184	2.76331	2.4985	2.5618
O15372	EIF3H	2.95144	3.14824	0.000710823	0.0830345	1.56142			9.41012	+	EIF3S3	Eukaryotic translation initiation factor 3 subunit H OS=Homo sapiens OX=9606 GN=EIF3H PE=1 SV=1	0	27.775	15	6	123	6	352	39.9	6.54	45.78	6	0	1.05887	0.843425	1.18197	1.54497	1.47142	1.31879	-0.457174	-0.792507	-0.350309
Q5RKV6	EXOSC6	1.18505	0.52574	0.29803	0.524197	0.244942			1.19519		MTR3	Exosome complex component MTR3 OS=Homo sapiens OX=9606 GN=EXOSC6 PE=1 SV=1	0	27.767	29	6	87	6	272	28.2	6.28	35.1	6	0	0.741139	0.570516	0.768671	-0.0891761	0.138894	-0.57905	0.742989	0.0789118	0.523598
P42696	RBM34	1.42279	0.698444	0.200242	0.393257	0.508718			1.53218		KIAA0117	RNA-binding protein 34 OS=Homo sapiens OX=9606 GN=RBM34 PE=1 SV=2	0	27.7	22	8	65	8	430	48.5	10.11	25.25	8	0	-0.20566	0.376361	0.0290387	0.538843	0.222994	0.851992	0.118976	-0.816693	-0.628698
Q9NXH8	TOR4A	1.22663	0.854541	0.139785	0.29931	0.294698			1.83885		C9orf167	Torsin-4A OS=Homo sapiens OX=9606 GN=TOR4A PE=1 SV=2	0	27.699	21	7	102	7	423	46.9	9.94	45.35	7	0	0.324182	0.475014	0.481532	1.50676	1.05038	0.813846	0.321822	-0.167928	0.242742
Q14192	FHL2	0.5688	1.95145	0.0111828	0.105387	-0.814007			-4.45739	+	DRAL SLIM3	Four and a half LIM domains protein 2 OS=Homo sapiens OX=9606 GN=FHL2 PE=1 SV=3	0	27.689	34	8	138	8	279	32.2	7.55	55.53	8	0	0.573221	0.374414	0.505163	1.07241	1.12613	1.24677	1.19432	1.63615	1.06435
Q05519	SRSF11	1.3137	0.769817	0.169896	0.346986	0.393641			1.67173		SFRS11	Serine/arginine-rich splicing factor 11 OS=Homo sapiens OX=9606 GN=SRSF11 PE=1 SV=1	0	27.683	14	4	120	4	484	53.5	10.52	48.17	4	0	1.51896	1.15607	1.24693	0.640635	1.07611	0.956495	1.24878	0.961668	0.530579
P42338	PIK3CB	0.856522	0.767364	0.170858	0.348451	-0.223437			-1.66692		PIK3C1	Phosphatidylinositol 4,5-bisphosphate 3-kinase catalytic subunit beta isoform OS=Homo sapiens OX=9606 GN=PIK3CB PE=1 SV=1	0	27.675	10	8	51	8	1070	122.7	7.09	12.47	8	0	-1.00551	-0.60624	-0.673172	-0.471488	-0.00263783	-0.122828	-0.544055	-0.444988	-0.625567
Q14689	DIP2A	2.7055	1.58949	0.025734	0.114272	1.4359			3.46356	+	C21orf106 DIP2 KIAA0184	Disco-interacting protein 2 homolog A OS=Homo sapiens OX=9606 GN=DIP2A PE=1 SV=2	0	27.665	7	9	53	7	1571	170.3	8.03	16.25	9	0	-2.38085	-2.10804	-2.19013	-2.03762	-1.71157	-1.67229	-3.1072	-4.45451	-3.425
Q96P70	IPO9	1.62505	4.4343	3.67874e-05	0.062	0.700488	+	C33A_C-IgG	20.0131	+	IMP9 KIAA1192 RANBP9	Importin-9 OS=Homo sapiens OX=9606 GN=IPO9 PE=1 SV=3	0	27.664	10	7	70	7	1041	115.9	4.81	24.01	7	0	1.12072	1.15254	1.07971	0.924922	1.3511	0.674033	0.471512	0.401259	0.378722
P16401	H1-5	1.12155	0.563551	0.27318	0.491926	0.165494			1.26924		H1F5 HIST1H1B	Histone H1.5 OS=Homo sapiens OX=9606 GN=H1-5 PE=1 SV=3	0	27.661	15	5	159	5	226	22.6	10.92	68.46	5	0	3.05044	2.93234	2.9443	2.67164	2.38573	2.49001	3.01549	2.58439	2.83072
Q15554	TERF2	1.07173	0.517786	0.303538	0.533369	0.0999449			1.17956		TRBF2 TRF2	Telomeric repeat-binding factor 2 OS=Homo sapiens OX=9606 GN=TERF2 PE=1 SV=3	0	27.644	15	7	73	7	542	59.6	9.35	31.3	7	0	1.24939	1.19343	1.43335	0.752987	0.617215	0.619162	1.25164	1.21824	1.10645
Q93084	ATP2A3	0.972555	0.149736	0.708376	0.863681	-0.0401482			-0.401797			Sarcoplasmic/endoplasmic reticulum calcium ATPase 3 OS=Homo sapiens OX=9606 GN=ATP2A3 PE=1 SV=3	0	27.642	11	7	154	7	999	109.2	5.52	73.55	7	0	1.81296	1.55108	1.53437	2.29455	2.48429	2.45209	1.74928	1.66902	1.60056
Q9BVS4	RIOK2	0.930171	0.153109	0.702896	0.862261	-0.104432			-0.409879		RIO2	Serine/threonine-protein kinase RIO2 OS=Homo sapiens OX=9606 GN=RIOK2 PE=1 SV=2	0	27.627	15	5	84	5	552	63.2	5.94	32.97	5	0	0.0932808	0.044788	0.157839	-1.13187	-2.51092	-0.418132	-0.241262	0.633704	0.216762
P28331	NDUFS1	1.07127	0.854905	0.139667	0.299493	0.0993227			1.83957			NADH-ubiquinone oxidoreductase 75 kDa subunit, mitochondrial OS=Homo sapiens OX=9606 GN=NDUFS1 PE=1 SV=3	0	27.624	16	8	51	8	727	79.4	6.23	16.9	8	0	-0.698266	-0.622137	-0.658102	-0.90867	-0.738985	-0.992231	-0.661741	-0.792325	-0.822407
Q9NUP9	LIN7C	0.796358	1.01683	0.0961989	0.230164	-0.328511			-2.16638		MALS3 VELI3	Protein lin-7 homolog C OS=Homo sapiens OX=9606 GN=LIN7C PE=1 SV=1	0	27.514	38	5	82	5	197	21.8	8.43	28.63	5	0	0.355633	0.313306	0.440884	0.689628	0.688969	0.664846	0.660527	0.96977	0.46506
Q8IY37	DHX37	1.2157	1.35227	0.0444356	0.147872	0.281786			2.89285		DDX37 KIAA1517	Probable ATP-dependent RNA helicase DHX37 OS=Homo sapiens OX=9606 GN=DHX37 PE=1 SV=1	0	27.503	7	7	84	7	1157	129.5	8.1	37.55	7	0	-0.0406271	-0.0709021	-0.124	-1.14994	-0.822984	-0.195142	-0.183321	-0.505295	-0.392273
Q12768	WASHC5	1.40965	0.590322	0.256849	0.466839	0.495333			1.32151		KIAA0196	WASH complex subunit 5 OS=Homo sapiens OX=9606 GN=WASHC5 PE=1 SV=1	0	27.491	10	8	50	8	1159	134.2	6.98	15.33	8	0	-1.21184	-1.22532	-0.774335	-1.28844	-1.41553	-0.820181	-1.26073	-1.18375	-2.25302
P28838	LAP3	0.937943	0.259019	0.550784	0.758195	-0.0924281			-0.650602		LAPEP PEPS	Cytosol aminopeptidase OS=Homo sapiens OX=9606 GN=LAP3 PE=1 SV=3	0	27.408	16	7	59	7	519	56.1	7.93	17.77	7	0	-2.68195	-2.55899	-2.99016	-2.08537	-2.22488	-2.17448	-2.52977	-2.70027	-2.72378
P45880	VDAC2	0.911577	0.330905	0.466762	0.689693	-0.133564			-0.803416			Voltage-dependent anion-selective channel protein 2 OS=Homo sapiens OX=9606 GN=VDAC2 PE=1 SV=2	0	27.341	34	7	94	7	294	31.5	7.56	34.74	7	0	0.437248	0.399548	0.622886	1.35918	1.4686	1.57675	0.665814	0.338334	0.856225
Q15366	PCBP2	1.01833	0.190229	0.645314	0.832046	0.0262063			0.496924			Poly(rC)-binding protein 2 OS=Homo sapiens OX=9606 GN=PCBP2 PE=1 SV=1	0	27.332	20	5	233	3	365	38.6	6.79	114.28	5	2	4.0238	4.17416	4.09125	3.72558	3.71758	3.90251	4.1004	4.01051	4.09968
Q13114	TRAF3	0.908549	0.120159	0.758299	0.88786	-0.138363			-0.329515		CAP-1 CRAF1 TRAFAMN	TNF receptor-associated factor 3 OS=Homo sapiens OX=9606 GN=TRAF3 PE=1 SV=2	0	27.32	17	8	49	8	568	64.4	7.91	14.13	8	0	-2.18022	-1.54759	-1.30917	-1.53012	-0.837731	-0.829445	-1.24921	-2.19881	-1.17387
Q8N766	EMC1	0.773338	0.220844	0.60139	0.803789	-0.37083			-0.5664		KIAA0090	ER membrane protein complex subunit 1 OS=Homo sapiens OX=9606 GN=EMC1 PE=1 SV=1	0	27.288	11	6	56	6	993	111.7	7.66	14.4	6	0	-2.08694	-1.38609	-2.0695	-1.28203	-1.17664	-1.12888	-2.12644	-2.05155	-0.252049
O95816	BAG2	0.988051	0.0368857	0.918574	0.963817	-0.017343			-0.108835			BAG family molecular chaperone regulator 2 OS=Homo sapiens OX=9606 GN=BAG2 PE=1 SV=1	0	27.225	37	7	224	7	211	23.8	6.7	97.31	7	0	1.77801	1.48869	1.62896	2.23575	2.11672	2.09759	1.81213	1.37979	1.75579
Q96A65	EXOC4	1.13594	0.199773	0.631287	0.823845	0.183881			0.51879		KIAA1699 SEC8 SEC8L1	Exocyst complex component 4 OS=Homo sapiens OX=9606 GN=EXOC4 PE=1 SV=1	0	27.213	9	7	84	7	974	110.4	6.49	26.12	7	0	-2.94815	-2.25513	-1.92348	-3.2867	-2.2441	-1.9813	-2.83975	-2.63051	-2.20814
Q9UGY1	NOL12	1.28936	0.535397	0.291476	0.514984	0.366661			1.21413			Nucleolar protein 12 OS=Homo sapiens OX=9606 GN=NOL12 PE=1 SV=1	0	27.173	49	7	43	7	213	24.6	10.23	10.58	7	0	-0.764374	-1.43898	-1.74851	-1.71947	-1.57191	-1.51285	-1.56844	-1.84346	-1.63995
P82650	MRPS22	0.924561	0.176954	0.665344	0.845334	-0.11316			-0.466176		C3orf5 RPMS22	Small ribosomal subunit protein mS22 OS=Homo sapiens OX=9606 GN=MRPS22 PE=1 SV=1	0	27.107	22	6	166	6	360	41.3	7.9	65.41	6	0	1.22466	0.59717	1.19503	-1.21118	0.382944	-0.00685267	0.987262	0.988445	1.38064
Q9Y5L0	TNPO3	0.37148	0.576437	0.265193	0.477399	-1.42864			-1.29441		IPO12	Transportin-3 OS=Homo sapiens OX=9606 GN=TNPO3 PE=1 SV=3	0	27.093	11	6	63	6	923	104.1	5.57	12.27	6	0	-5.46955	-2.0556	-2.52406	-1.12777	-1.72484	-1.87414	-2.31521	-2.06004	-1.38803
P61619	SEC61A1	0.936015	0.239065	0.57668	0.783282	-0.0953958			-0.606899		SEC61A	Protein transport protein Sec61 subunit alpha isoform 1 OS=Homo sapiens OX=9606 GN=SEC61A1 PE=1 SV=2	0	27.012	21	8	83	7	476	52.2	8.06	32.84	8	0	0.595131	1.06824	0.770676	0.428186	0.949406	0.531137	0.756829	0.989924	0.97348
P40937	RFC5	1.36613	0.884015	0.130613	0.283861	0.450092			1.89752			Replication factor C subunit 5 OS=Homo sapiens OX=9606 GN=RFC5 PE=1 SV=1	0	27.011	27	8	97	8	340	38.5	7.2	47.48	8	0	1.13647	1.10382	0.874468	0.856828	0.874135	0.859881	0.859744	0.147264	0.757473
Q9UPP1	PHF8	0.975476	0.131955	0.737981	0.880702	-0.0358218			-0.358657		KIAA1111 ZNF422	Histone lysine demethylase PHF8 OS=Homo sapiens OX=9606 GN=PHF8 PE=1 SV=3	0	26.974	8	8	94	8	1060	117.8	8.72	31.33	8	0	-0.245584	-0.0250018	0.0489154	-0.802342	-2.80699	-1.03067	-0.126735	0.0298299	-0.0172996
Q8N7H5	PAF1	1.03035	0.115132	0.767128	0.888997	0.043139			0.316959		PD2	RNA polymerase II-associated factor 1 homolog OS=Homo sapiens OX=9606 GN=PAF1 PE=1 SV=2	0	26.932	12	7	100	7	531	59.9	4.63	30.2	7	0	0.0655689	0.154281	0.40628	-0.0823114	0.282027	-0.133019	0.339069	0.0369598	0.120684
O43592	XPOT	1.04369	0.176952	0.665347	0.844996	0.0616889			0.466171			Exportin-T OS=Homo sapiens OX=9606 GN=XPOT PE=1 SV=2	0	26.897	11	8	68	8	962	109.9	5.39	29.59	8	0	0.0951462	-0.275539	0.00823138	-0.526772	0.380313	0.220947	-0.193066	0.0220691	-0.186232
P49959	MRE11	0.866209	0.633446	0.23257	0.433181	-0.207212			-1.40555		HNGS1 MRE11A	Double-strand break repair protein MRE11 OS=Homo sapiens OX=9606 GN=MRE11 PE=1 SV=3	0	26.883	11	7	80	7	708	80.5	5.9	23.07	7	0	0.623245	0.880601	0.852715	0.969461	1.04002	0.338619	1.21814	0.795461	0.9646
Q16629	SRSF7	1.12535	0.908466	0.123462	0.272949	0.170371			1.94643		SFRS7	Serine/arginine-rich splicing factor 7 OS=Homo sapiens OX=9606 GN=SRSF7 PE=1 SV=1	0	26.855	29	7	144	7	238	27.4	11.82	76.95	7	0	3.43853	3.32814	3.56407	3.72709	3.44205	3.5411	3.33371	3.32236	3.16356
P20339	RAB5A	0.88752	0.590746	0.256598	0.466739	-0.172149			-1.32234		RAB5	Ras-related protein Rab-5A OS=Homo sapiens OX=9606 GN=RAB5A PE=1 SV=2	0	26.786	34	6	231	4	215	23.6	8.15	106.43	6	2	2.4692	2.19803	2.43448	2.54838	2.69928	2.69868	2.64187	2.34257	2.63372
P46777	RPL5	1.80327	1.5116	0.0307893	0.119801	0.850617			3.27			Large ribosomal subunit protein uL18 OS=Homo sapiens OX=9606 GN=RPL5 PE=1 SV=3	0	26.732	21	6	255	6	297	34.3	9.72	121.04	6	0	3.86543	3.88725	3.93386	4.14113	3.95187	3.80244	3.36152	2.53079	3.24237
P49257	LMAN1	1.31926	0.640058	0.229056	0.429157	0.39973			1.41843		ERGIC53 F5F8D	Protein ERGIC-53 OS=Homo sapiens OX=9606 GN=LMAN1 PE=1 SV=2	0	26.72	18	7	76	7	510	57.5	6.77	25.42	7	0	-0.290597	0.477004	-0.0014701	1.10637	1.00377	0.8649	-0.0129176	-0.593749	-0.407585
P35659	DEK	1.44803	1.15727	0.0696192	0.187563	0.534087			2.46096			Protein DEK OS=Homo sapiens OX=9606 GN=DEK PE=1 SV=1	0	26.708	22	6	102	6	375	42.6	8.56	46.2	6	0	1.46803	1.43512	1.41293	0.781335	0.877388	0.614921	1.26664	0.518095	0.929091
Q9BWE0	REPIN1	0.677362	0.496211	0.318999	0.553794	-0.562001			-1.13708		RIP60 ZNF464	Replication initiator 1 OS=Homo sapiens OX=9606 GN=REPIN1 PE=1 SV=1	0	26.657	15	7	76	7	567	63.5	9.98	27.28	7	0	-1.76558	-2.08506	-0.761635	-1.10912	-1.90029	-2.17396	-1.3345	-0.396837	-1.19494
P04114	APOB	1.07145	0.419634	0.38051	0.611399	0.0995594			0.984722			Apolipoprotein B-100 OS=Homo sapiens OX=9606 GN=APOB PE=1 SV=3	0	26.647	1	7	149	7	4563	515.2	7.05	83.55	7	0	2.33195	2.26788	2.3491	2.27533	2.15216	2.44089	2.35269	2.02641	2.27115
Q00577	PURA	0.580003	0.364182	0.432333	0.659021	-0.785868			-0.872185		PUR1	Transcriptional activator protein Pur-alpha OS=Homo sapiens OX=9606 GN=PURA PE=1 SV=2	0	26.64	30	6	75	5	322	34.9	6.44	22.46	6	0	-1.60761	-3.14624	-2.71374	-2.4799	-2.248	-3.07957	-3.22001	-1.22902	-0.660959
P13995	MTHFD2	1.67344	0.392899	0.40467	0.63568	0.742816			0.93075		NMDMC	Bifunctional methylenetetrahydrofolate dehydrogenase/cyclohydrolase, mitochondrial OS=Homo sapiens OX=9606 GN=MTHFD2 PE=1 SV=2	0	26.618	25	6	92	6	350	37.9	8.73	33.86	6	0	-0.608234	-0.273037	-0.041724	-0.682301	-1.2093	-0.82163	-0.145255	-2.60541	-0.400778
Q96CB9	NSUN4	1.10266	0.344298	0.452587	0.67787	0.14099			0.831222			5-methylcytosine rRNA methyltransferase NSUN4 OS=Homo sapiens OX=9606 GN=NSUN4 PE=1 SV=2	0	26.591	18	7	178	7	384	43.1	8.18	79.81	7	0	1.54157	1.61314	1.40669	2.46072	2.1727	2.47236	1.6568	1.108	1.37363
Q8NC67	NETO2	1.13188	0.114211	0.768756	0.889241	0.178722			0.314651		BTCL2	Neuropilin and tolloid-like protein 2 OS=Homo sapiens OX=9606 GN=NETO2 PE=1 SV=1	0	26.565	17	6	75	6	525	59.4	6.81	33.02	6	0	-0.873287	-1.22755	-0.018149	-0.677251	-0.654816	-1.18213	-1.01435	-1.57456	-0.0662289
O15427	SLC16A3	0.79604	1.27109	0.0535685	0.166985	-0.329088			-2.70944		MCT3 MCT4	Monocarboxylate transporter 4 OS=Homo sapiens OX=9606 GN=SLC16A3 PE=1 SV=1	0	26.546	14	6	98	6	465	49.4	7.96	47.12	6	0	2.1923	1.94998	2.29173	2.46979	2.75992	2.74094	2.43017	2.38632	2.60479
P54619	PRKAG1	0.882265	1.29025	0.0512568	0.162263	-0.180716			-2.75223			5'-AMP-activated protein kinase subunit gamma-1 OS=Homo sapiens OX=9606 GN=PRKAG1 PE=1 SV=1	0	26.521	26	6	74	6	331	37.6	6.92	24.12	6	0	-1.86171	-1.77276	-1.97941	-1.30909	-1.36127	-1.41398	-1.6399	-1.6997	-1.73213
P00505	GOT2	1.68435	0.933233	0.116618	0.264981	0.75219			1.99622		KYAT4	Aspartate aminotransferase, mitochondrial OS=Homo sapiens OX=9606 GN=GOT2 PE=1 SV=3	0	26.518	20	7	77	7	430	47.5	9.01	32.22	7	0	0.0586185	1.24519	0.418516	-0.441061	-0.52988	-0.220513	-0.446189	-0.000514059	-0.0875416
O60493	SNX3	1.19239	0.485179	0.327206	0.561722	0.253852			1.1153			Sorting nexin-3 OS=Homo sapiens OX=9606 GN=SNX3 PE=1 SV=3	0	26.505	36	7	130	5	162	18.8	8.66	66.92	7	1	1.52183	1.38858	1.31934	1.61821	1.55092	1.62062	1.51325	0.755792	1.19915
Q96KA5	CLPTM1L	1.34313	0.27959	0.525303	0.737613	0.425604			0.69502		CRR9	Lipid scramblase CLPTM1L OS=Homo sapiens OX=9606 GN=CLPTM1L PE=1 SV=1	0	26.503	14	6	123	6	538	62.2	8.56	58.63	6	0	-0.816993	-1.0404	-2.35865	-0.223956	-0.433138	-0.437353	-1.09946	-2.36872	-2.02467
P17612	PRKACA	0.962719	0.191458	0.64349	0.83202	-0.0548136			-0.499751		PKACA	cAMP-dependent protein kinase catalytic subunit alpha OS=Homo sapiens OX=9606 GN=PRKACA PE=1 SV=2	0	26.497	30	8	101	8	351	40.6	8.79	40.39	8	0	1.22909	1.2747	1.19327	0.75537	1.20524	1.64667	1.23225	1.13529	1.49397
Q86X10	RALGAPB	2.48943	2.27863	0.0052646	0.0915238	1.31582			5.51831	+	KIAA1219	Ral GTPase-activating protein subunit beta OS=Homo sapiens OX=9606 GN=RALGAPB PE=1 SV=1	0	26.482	8	7	42	7	1494	166.7	6.79	10.29	7	0	-0.891726	-1.52331	-1.02077	-1.21399	-1.61713	-1.15528	-2.2984	-2.74085	-2.34401
Q9H0D6	XRN2	0.972756	0.099147	0.79589	0.901772	-0.0398508			-0.276462			5'-3' exoribonuclease 2 OS=Homo sapiens OX=9606 GN=XRN2 PE=1 SV=1	0	26.473	10	7	96	7	950	108.5	7.47	36.74	7	0	0.0359344	0.264101	0.434307	0.119312	0.341234	0.434174	0.336423	0.401449	0.116023
P08174	CD55	0.967925	0.0734185	0.844465	0.927766	-0.0470323			-0.209268		CR DAF	Complement decay-accelerating factor OS=Homo sapiens OX=9606 GN=CD55 PE=1 SV=4	0	26.42	25	7	94	7	381	41.4	7.59	34.13	7	0	0.0921593	0.637929	0.256449	0.526302	0.474076	0.674745	0.530155	0.0636117	0.533868
Q9BW92	TARS2	1.41786	0.302662	0.498125	0.714538	0.503715			0.74415		TARSL1	Threonine--tRNA ligase, mitochondrial OS=Homo sapiens OX=9606 GN=TARS2 PE=1 SV=1	0	26.415	11	8	117	8	718	81	7.3	36.03	8	0	-0.45518	-0.496709	-0.658501	-1.34516	-1.38836	-2.46696	-2.38862	-0.366074	-0.366844
Q07960	ARHGAP1	1.40736	1.08943	0.0813904	0.205431	0.492987			2.31715		CDC42GAP RHOGAP1	Rho GTPase-activating protein 1 OS=Homo sapiens OX=9606 GN=ARHGAP1 PE=1 SV=1	0	26.415	18	7	93	7	439	50.4	6.29	36.37	7	0	0.184343	0.44867	0.175592	0.662984	0.682017	0.637388	-0.0329466	-0.609375	-0.0280342
P46779	RPL28	0.98226	0.0358127	0.920847	0.963415	-0.0258228			-0.105784			Large ribosomal subunit protein eL28 OS=Homo sapiens OX=9606 GN=RPL28 PE=1 SV=3	0	26.403	28	6	365	6	137	15.7	12.02	173.37	6	0	5.083	4.81679	5.01975	4.65026	4.55577	4.4798	5.37184	4.5777	5.04747
P06756	ITGAV	0.622513	0.335434	0.461919	0.684414	-0.683825			-0.81284		MSK8 VNRA VTNR	Integrin alpha-V OS=Homo sapiens OX=9606 GN=ITGAV PE=1 SV=2	0	26.385	9	8	38	8	1048	116	5.68	11.35	8	0	-2.89181	-3.91294	-1.57942	-0.189085	-0.434136	-0.764806	-2.14435	-2.96251	-1.22583
Q9NVI1	FANCI	2.27597	2.20624	0.00621959	0.0895724	1.18648			5.26824	+	KIAA1794	Fanconi anemia group I protein OS=Homo sapiens OX=9606 GN=FANCI PE=1 SV=4	0	26.337	7	7	38	7	1328	149.2	6.74	9.79	7	0	1.06168	1.20087	0.695131	0.0626974	0.267583	-0.300761	-0.21399	-0.483339	0.0955571
Q6PJT7	ZC3H14	0.561133	2.20546	0.00623072	0.0889589	-0.833586			-5.2656	+		Zinc finger CCCH domain-containing protein 14 OS=Homo sapiens OX=9606 GN=ZC3H14 PE=1 SV=1	0	26.305	11	7	73	7	736	82.8	7.31	23.92	7	0	-0.811173	-0.847219	-0.626657	-1.94201	-1.21286	-0.756135	-0.0846268	0.357071	-0.056736
P47755	CAPZA2	1.6838	0.254596	0.556421	0.762806	0.751724			0.64097			F-actin-capping protein subunit alpha-2 OS=Homo sapiens OX=9606 GN=CAPZA2 PE=1 SV=3	0	26.303	28	5	145	3	286	32.9	5.85	55.89	5	0	-2.01059	-1.71656	-0.515302	-3.72236	-0.748957	-5.18068	-4.31949	-1.23124	-0.946899
Q96RE7	NACC1	0.357383	1.19744	0.0634693	0.175937	-1.48446			-2.54756		BTBD14B NAC1	Nucleus accumbens-associated protein 1 OS=Homo sapiens OX=9606 GN=NACC1 PE=1 SV=1	0	26.287	19	7	57	7	527	57.2	5.74	18.74	7	0	-2.14349	-3.10034	-1.7308	-3.79145	-2.87322	-1.74436	-1.33717	-0.00898786	-1.1751
O95625	ZBTB11	1.47455	0.956899	0.110434	0.252882	0.560277			2.04405			Zinc finger and BTB domain-containing protein 11 OS=Homo sapiens OX=9606 GN=ZBTB11 PE=1 SV=2	0	26.244	8	7	69	7	1053	119.3	8.66	28.76	7	0	-0.613965	-0.831202	-1.00546	-0.630254	-0.588516	-0.55459	-0.887792	-1.5363	-1.70737
P63208	SKP1	1.15523	1.18011	0.0660523	0.182486	0.208185			2.51007		EMC19 OCP2 SKP1A TCEB1L	S-phase kinase-associated protein 1 OS=Homo sapiens OX=9606 GN=SKP1 PE=1 SV=2	0	26.162	35	8	165	8	163	18.6	4.54	83.44	8	0	2.58434	2.37771	2.51403	2.138	2.38463	1.99559	2.30685	2.17641	2.36827
P62829	RPL23	0.991232	0.0185326	0.958225	0.977872	-0.0127056			-0.0557365			Large ribosomal subunit protein uL14 OS=Homo sapiens OX=9606 GN=RPL23 PE=1 SV=1	0	26.143	52	5	278	5	140	14.9	10.51	105.96	5	0	5.05837	5.02921	4.95398	4.09139	3.65598	4.08035	5.42391	4.64192	5.01385
P56945	BCAR1	0.635867	2.1261	0.00747996	0.0888235	-0.653203			-5.00198	+	CAS CASS1 CRKAS	Breast cancer anti-estrogen resistance protein 1 OS=Homo sapiens OX=9606 GN=BCAR1 PE=1 SV=2	0	26.133	10	6	74	6	870	93.3	5.67	27.07	6	0	-0.538862	-0.399541	-0.506723	-0.679667	-0.779619	-0.582632	0.0545054	0.418598	0.0413782
O95232	LUC7L3	0.927177	0.0913349	0.810336	0.908744	-0.109083			-0.256335		CREAP1 CROP O48	Luc7-like protein 3 OS=Homo sapiens OX=9606 GN=LUC7L3 PE=1 SV=2	0	26.126	20	7	68	7	432	51.4	9.79	26.17	7	0	-1.11352	-0.490501	-0.99746	-0.888232	-3.54666	-0.683911	-0.0988495	-0.759714	-1.41567
P24539	ATP5PB	1.12419	0.358755	0.437769	0.665537	0.168884			0.861042		ATP5F1	ATP synthase F(0) complex subunit B1, mitochondrial OS=Homo sapiens OX=9606 GN=ATP5PB PE=1 SV=2	0	26.105	19	5	99	5	256	28.9	9.36	44.92	5	0	0.516651	0.848682	0.7611	0.510326	-0.139504	0.391475	0.849727	0.267479	0.502576
Q8IVS2	MCAT	1.82328	1.11441	0.0768396	0.200631	0.866533			2.36978		MT	Malonyl-CoA-acyl carrier protein transacylase, mitochondrial OS=Homo sapiens OX=9606 GN=MCAT PE=1 SV=2	0	26.085	23	6	90	6	390	42.9	8.72	30.32	6	0	0.253693	-0.714545	0.316874	-0.40819	-0.826584	0.155006	-1.05996	-1.06773	-0.615883
Q9NRZ9	HELLS	1.05043	0.247946	0.565007	0.770791	0.0709733			0.62643		PASG SMARCA6	Lymphoid-specific helicase OS=Homo sapiens OX=9606 GN=HELLS PE=1 SV=1	0	26.081	7	7	126	7	838	97	7.93	54.08	7	0	1.23766	1.30208	1.17801	0.96365	0.688712	0.800059	1.29381	0.95438	1.25663
Q02809	PLOD1	0.896197	0.640394	0.228879	0.429135	-0.158113			-1.41908		LLH PLOD	Procollagen-lysine,2-oxoglutarate 5-dioxygenase 1 OS=Homo sapiens OX=9606 GN=PLOD1 PE=1 SV=2	0	26.04	13	8	67	8	727	83.5	6.95	23.8	8	0	-0.332588	-0.566127	-0.261307	-0.558633	0.299159	0.104286	-0.269237	-0.105369	-0.311077
Q12933	TRAF2	1.79314	0.321096	0.477423	0.699208	0.842485			0.782935		TRAP3	TNF receptor-associated factor 2 OS=Homo sapiens OX=9606 GN=TRAF2 PE=1 SV=2	0	26.037	14	6	101	6	501	55.8	7.53	31.85	6	0	-0.612956	-1.05099	-1.34507	-0.541873	-0.481222	-0.563264	-1.11964	-3.92389	-0.492945
Q9NZT2	OGFR	0.807873	0.317332	0.481579	0.704083	-0.307799			-0.775047			Opioid growth factor receptor OS=Homo sapiens OX=9606 GN=OGFR PE=1 SV=3	0	26.025	13	7	57	7	677	73.3	4.84	21.73	7	0	-0.0347867	0.194765	0.163379	0.774898	0.574701	0.695841	0.46834	1.06417	-0.285753
Q06265	EXOSC9	1.09406	0.464403	0.343239	0.57906	0.129692			1.07414		PMSCL1	Exosome complex component RRP45 OS=Homo sapiens OX=9606 GN=EXOSC9 PE=1 SV=3	0	26.019	21	6	79	6	439	48.9	5.29	27.24	6	0	-0.0994938	-0.162147	-0.0235552	-0.444313	-0.304288	-0.601845	-0.0332462	-0.427334	-0.213692
Q92688	ANP32B	0.34712	0.978607	0.105049	0.244039	-1.52649			-2.08816		APRIL PHAPI2	Acidic leucine-rich nuclear phosphoprotein 32 family member B OS=Homo sapiens OX=9606 GN=ANP32B PE=1 SV=1	0	25.981	25	5	131	5	251	28.8	4.06	59.23	5	0	1.26503	1.62066	3.48083	3.34863	3.01229	3.10734	3.29463	4.13081	3.52056
P55084	HADHB	1.04381	0.093364	0.806559	0.908134	0.0618524			0.261585			Trifunctional enzyme subunit beta, mitochondrial OS=Homo sapiens OX=9606 GN=HADHB PE=1 SV=3	0	25.938	19	7	69	7	474	51.3	9.41	33.76	7	0	-0.176938	-0.198494	0.222646	-0.818016	-0.481649	-0.208903	0.211611	-0.0945379	-0.455416
Q96C36	PYCR2	0.950851	0.118909	0.760486	0.887713	-0.0727084			-0.3264			Pyrroline-5-carboxylate reductase 2 OS=Homo sapiens OX=9606 GN=PYCR2 PE=1 SV=1	0	25.922	21	6	146	5	320	33.6	7.77	47.63	6	1	1.52545	1.49233	1.89088	1.91362	1.80876	1.72499	1.68866	1.4034	2.03473
Q86UK7	ZNF598	1.40542	0.858751	0.138436	0.297312	0.491005			1.84721			E3 ubiquitin-protein ligase ZNF598 OS=Homo sapiens OX=9606 GN=ZNF598 PE=1 SV=1	0	25.905	9	8	69	8	904	98.6	8.4	23.95	8	0	-0.652435	-0.56075	-0.480297	-2.22555	-1.43861	-0.831317	-1.33815	-1.29447	-0.533876
Q969S3	ZNF622	1.15126	1.94863	0.0112555	0.104071	0.203219			4.44899		ZPR9	Cytoplasmic 60S subunit biogenesis factor ZNF622 OS=Homo sapiens OX=9606 GN=ZNF622 PE=1 SV=1	0	25.895	16	6	80	6	477	54.2	6.15	39.24	6	0	1.1537	1.06651	1.10308	0.649347	0.88593	0.554189	0.85261	0.978673	0.882345
Q9Y5A9	YTHDF2	0.996242	0.0217233	0.951211	0.976612	-0.00543205			-0.06511		HGRG8	YTH domain-containing family protein 2 OS=Homo sapiens OX=9606 GN=YTHDF2 PE=1 SV=2	0	25.877	13	6	74	5	579	62.3	8.79	35.07	6	1	1.05512	1.14493	1.30665	0.212737	-0.000957999	0.140869	1.10224	1.2375	1.18326
Q15758	SLC1A5	0.948171	0.170883	0.67471	0.847614	-0.076781			-0.451978		ASCT2 M7V1 RDR RDRC	Neutral amino acid transporter B(0) OS=Homo sapiens OX=9606 GN=SLC1A5 PE=1 SV=2	0	25.852	12	6	157	6	541	56.6	5.48	91.81	6	0	1.82377	1.74467	2.2534	2.4151	2.69849	2.5754	1.92077	2.13377	1.99766
Q9BSF8	BTBD10	31.1107	1.91179	0.012252	0.102931	4.95934			4.3401	+	GMRP1	BTB/POZ domain-containing protein 10 OS=Homo sapiens OX=9606 GN=BTBD10 PE=1 SV=2	0	25.842	15	6	76	6	475	53.7	7.77	24.3	6	0	-0.321428	-0.400255	-0.127486	-0.774624	-0.961677	-0.959784	-6.39352	-2.96283	-6.37083
P51148	RAB5C	1.15031	0.637398	0.230463	0.430726	0.202024			1.41325		RABL	Ras-related protein Rab-5C OS=Homo sapiens OX=9606 GN=RAB5C PE=1 SV=2	0	25.806	29	5	167	3	216	23.5	8.41	86.25	5	0	0.78052	0.634416	0.609173	0.92142	0.880795	0.884034	0.589976	0.20805	0.620012
P43353	ALDH3B1	1.05143	0.138311	0.727259	0.875054	0.072348			0.374182		ALDH7	Aldehyde dehydrogenase family 3 member B1 OS=Homo sapiens OX=9606 GN=ALDH3B1 PE=1 SV=1	0	25.736	15	6	92	5	468	51.8	7.62	30.85	6	0	-0.595245	-0.561694	-1.02824	-0.0586428	0.0581601	-0.330404	-0.558207	-0.939984	-0.904032
P23919	DTYMK	1.0563	0.161062	0.690141	0.85489	0.0790131			0.428817		CDC8 TMPK TYMK	Thymidylate kinase OS=Homo sapiens OX=9606 GN=DTYMK PE=1 SV=4	0	25.728	32	7	94	7	212	23.8	8.27	31.7	7	0	-0.189176	-0.399825	-0.540187	-0.236949	-0.152844	-2.13585	-0.371854	-0.752928	-0.241446
Q6DN90	IQSEC1	1.06361	0.140044	0.724363	0.873366	0.0889667			0.378395		ARFGEP100 BRAG2 KIAA0763	IQ motif and SEC7 domain-containing protein 1 OS=Homo sapiens OX=9606 GN=IQSEC1 PE=1 SV=1	0	25.728	11	8	61	6	963	108.2	6.93	20.64	8	2	-0.516066	-0.613818	-1.08899	-1.1964	-0.978816	-0.975492	-0.552479	-1.08801	-0.845293
P11310	ACADM	0.984616	0.0646756	0.861637	0.938143	-0.022367			-0.185808			Medium-chain specific acyl-CoA dehydrogenase, mitochondrial OS=Homo sapiens OX=9606 GN=ACADM PE=1 SV=1	0	25.682	14	5	114	5	421	46.6	8.37	51.18	5	0	0.748692	0.865264	0.905856	1.18281	1.33151	1.37529	0.654712	1.03314	0.89906
Q06830	PRDX1	0.617345	0.480057	0.331088	0.566737	-0.695851			-1.10517		PAGA PAGB TDPX2	Peroxiredoxin-1 OS=Homo sapiens OX=9606 GN=PRDX1 PE=1 SV=1	0	25.668	43	6	86	4	199	22.1	8.13	33.89	6	1	0.264715	2.11459	2.15817	1.93663	2.29751	2.40706	2.33791	2.05115	2.23597
Q9Y5Q9	GTF3C3	0.739623	0.435844	0.36657	0.602656	-0.435139			-1.01722			General transcription factor 3C polypeptide 3 OS=Homo sapiens OX=9606 GN=GTF3C3 PE=1 SV=1	0	25.661	11	8	55	8	886	101.2	5.07	14.57	8	0	-2.32153	-0.997472	-1.09943	-2.21157	-2.37117	-1.02118	-0.979009	-1.12647	-1.00753
O60784	TOM1	1.31363	0.905616	0.124275	0.273448	0.39356			1.94072			Target of Myb1 membrane trafficking protein OS=Homo sapiens OX=9606 GN=TOM1 PE=1 SV=2	0	25.637	19	6	100	6	492	53.8	4.7	49.54	6	0	1.19151	0.939959	1.02068	0.900259	1.08616	1.06131	0.796416	0.283668	0.89139
Q9Y6G9	DYNC1LI1	1.0065	0.0251179	0.943805	0.97469	0.00934386			0.0750149		DNCLI1	Cytoplasmic dynein 1 light intermediate chain 1 OS=Homo sapiens OX=9606 GN=DYNC1LI1 PE=1 SV=3	0	25.611	20	7	76	6	523	56.5	6.42	23.81	7	1	-0.57431	-0.386377	-0.373242	-0.504659	0.00662463	-0.39031	-0.351452	-0.666522	-0.343986
P49585	PCYT1A	0.982688	0.0807309	0.830365	0.923112	-0.0251954			-0.228636		CTPCT PCYT1	Choline-phosphate cytidylyltransferase A OS=Homo sapiens OX=9606 GN=PCYT1A PE=1 SV=2	0	25.596	25	7	56	7	367	41.7	7.25	21.76	7	0	-0.52	-0.589176	-0.264073	-0.493439	-0.386477	-0.466619	-0.425515	-0.520126	-0.352022
O75874	IDH1	0.801047	0.291379	0.511236	0.727022	-0.320041			-0.720209		PICD	Isocitrate dehydrogenase [NADP] cytoplasmic OS=Homo sapiens OX=9606 GN=IDH1 PE=1 SV=2	0	25.588	20	7	100	6	414	46.6	7.01	42.26	7	0	-1.48043	0.000297996	-0.436492	-0.22671	-0.126266	0.0908287	-0.260317	-0.452854	-0.24333
Q92995	USP13	0.235254	0.769536	0.170006	0.346882	-2.08771			-1.67118		ISOT3	Ubiquitin carboxyl-terminal hydrolase 13 OS=Homo sapiens OX=9606 GN=USP13 PE=1 SV=2	0	25.576	12	6	58	6	863	97.3	5.53	18.47	6	0	-2.45397	-2.19269	-5.99368	-2.30718	-2.42369	-2.82318	-1.76774	-0.984096	-1.62539
Q99829	CPNE1	2.87495	1.10947	0.0777196	0.201305	1.52354			2.35933		CPN1	Copine-1 OS=Homo sapiens OX=9606 GN=CPNE1 PE=1 SV=1	0	25.574	16	6	62	6	537	59	5.83	28.03	6	0	1.26001	1.22418	0.7193	0.385896	0.212627	0.552001	-0.0559186	-1.67525	0.364046
Q9BT22	ALG1	0.995651	0.0185382	0.958212	0.978195	-0.00628818			-0.0557528		HMAT1 HMT1	Chitobiosyldiphosphodolichol beta-mannosyltransferase OS=Homo sapiens OX=9606 GN=ALG1 PE=1 SV=2	0	25.573	17	6	109	6	464	52.5	7.23	37.87	6	0	-0.386919	-0.391481	-0.545285	-0.0332223	-0.357848	-0.249326	-0.340221	-0.634969	-0.329632
Q14498	RBM39	1.48014	1.91353	0.012203	0.10335	0.565738			4.3452		HCC1 RNPC2	RNA-binding protein 39 OS=Homo sapiens OX=9606 GN=RBM39 PE=1 SV=2	0	25.541	14	6	118	6	530	59.3	10.1	46.2	6	0	2.17978	1.82635	1.83193	1.98728	2.1875	1.848	1.27164	1.46637	1.40283
Q6P474	PDXDC2P	1.03789	0.213103	0.612205	0.81316	0.0536484			0.549011		PDXDC2	Putative pyridoxal-dependent decarboxylase domain-containing protein 2 OS=Homo sapiens OX=9606 GN=PDXDC2P PE=5 SV=3	0	25.54	17	6	97	6	469	51.8	5.96	39.66	6	0	0.142294	0.280699	0.187807	0.67306	0.72498	0.425307	0.227143	-0.0272143	0.249925
P20700	LMNB1	1.00293	0.00524265	0.988001	0.99422	0.00421377			0.0159996		LMN2 LMNB	Lamin-B1 OS=Homo sapiens OX=9606 GN=LMNB1 PE=1 SV=2	0	25.533	15	8	93	7	586	66.4	5.16	39.93	8	0	-2.33612	-1.91918	-2.65986	-2.24403	-2.77426	-2.80715	-2.32429	-2.03711	-2.56641
Q9Y2R9	MRPS7	0.867806	0.656543	0.220524	0.420694	-0.204555			-1.45053			Small ribosomal subunit protein uS7m OS=Homo sapiens OX=9606 GN=MRPS7 PE=1 SV=2	0	25.518	26	6	128	6	242	28.1	9.99	56.2	6	0	1.63335	1.41928	1.62474	1.5876	1.35861	1.54829	1.9531	1.80337	1.53456
Q9Y3U8	RPL36	1.1657	0.485063	0.327293	0.561345	0.221201			1.11507			Large ribosomal subunit protein eL36 OS=Homo sapiens OX=9606 GN=RPL36 PE=1 SV=3	0	25.463	37	5	154	5	105	12.2	11.59	54.93	5	0	4.02384	3.94875	3.83076	3.66435	3.69909	3.69397	4.01364	3.36079	3.76531
Q969X6	UTP4	1.16759	1.259	0.0550814	0.165881	0.223536			2.68257		CIRH1A cPERP-E KIAA1988	U3 small nucleolar RNA-associated protein 4 homolog OS=Homo sapiens OX=9606 GN=UTP4 PE=1 SV=1	0	25.444	13	6	74	6	686	76.8	8.85	28.83	6	0	0.382839	0.240686	0.0989808	-0.264417	-0.250975	0.0612102	0.0354853	-0.0127534	0.0291653
Q9NUQ3	TXLNG	1.16814	0.364575	0.431942	0.658471	0.224209			0.872992		CXorf15 ELRG LSR5	Gamma-taxilin OS=Homo sapiens OX=9606 GN=TXLNG PE=1 SV=2	0	25.443	19	8	75	7	528	60.5	7.52	27.13	8	1	0.504658	0.625666	0.885092	0.355502	0.438983	0.173757	0.819511	0.0242312	0.499047
Q9HCK8	CHD8	0.638625	0.846019	0.142555	0.304645	-0.646959			-1.82195		HELSNF1 KIAA1564	Chromodomain-helicase-DNA-binding protein 8 OS=Homo sapiens OX=9606 GN=CHD8 PE=1 SV=5	0	25.403	3	8	37	7	2581	290.3	6.47	11.09	8	0	-2.27484	-1.56413	-1.13947	-3.58235	-2.59898	-1.84315	-1.23082	-0.787419	-1.01932
O96019	ACTL6A	1.0165	0.064749	0.861491	0.938158	0.0236156			0.186007		BAF53 BAF53A INO80K	Actin-like protein 6A OS=Homo sapiens OX=9606 GN=ACTL6A PE=1 SV=1	0	25.395	21	6	91	3	429	47.4	5.6	33.92	6	2	1.04452	0.821055	0.873165	0.216665	0.407188	-0.902485	1.06405	0.693367	0.910481
Q8IZP0	ABI1	1.01085	0.0240977	0.946024	0.975053	0.0155676			0.0720452		SSH3BP1	Abl interactor 1 OS=Homo sapiens OX=9606 GN=ABI1 PE=1 SV=4	0	25.391	13	6	72	6	508	55	7.06	24.47	6	0	-0.175605	0.274993	0.556416	0.533545	-0.238048	0.0626394	0.139347	0.260985	0.20877
P42766	RPL35	1.02288	0.0596365	0.871693	0.941191	0.0326408			0.17213			Large ribosomal subunit protein uL29 OS=Homo sapiens OX=9606 GN=RPL35 PE=1 SV=2	0	25.37	28	5	313	5	123	14.5	11.05	179.78	5	0	5.98682	5.73301	5.79624	5.43175	5.48328	5.72486	6.05393	5.47155	5.89267
P27105	STOM	0.870454	0.690445	0.203965	0.396491	-0.20016			-1.51658		BND7 EPB72	Stomatin OS=Homo sapiens OX=9606 GN=STOM PE=1 SV=3	0	25.365	20	5	34	5	288	31.7	7.88	15.56	5	0	-1.26834	-1.60791	-1.18387	0.612973	0.600935	0.629944	-1.12377	-1.13285	-1.20302
Q9NRA8	EIF4ENIF1	0.907156	0.268318	0.539116	0.746843	-0.140578			-0.670757			Eukaryotic translation initiation factor 4E transporter OS=Homo sapiens OX=9606 GN=EIF4ENIF1 PE=1 SV=2	0	25.365	10	7	26	7	985	108.1	8.32	11.74	7	0	-2.53719	-2.76313	-2.34117	-3.28775	-3.53197	-3.18198	-2.18266	-2.29589	-2.74121
Q8NEM2	SHCBP1	0.941015	0.186533	0.65083	0.837685	-0.0877101			-0.488403			SHC SH2 domain-binding protein 1 OS=Homo sapiens OX=9606 GN=SHCBP1 PE=1 SV=3	0	25.303	12	8	44	8	672	75.6	4.75	14.23	8	0	-0.246986	-0.212027	0.0424733	-0.300268	-0.28289	-0.631219	0.255873	-0.171501	-0.237782
P29692	EEF1D	0.636288	2.15672	0.00697083	0.088375	-0.652248			-5.10242	+	EF1D	Elongation factor 1-delta OS=Homo sapiens OX=9606 GN=EEF1D PE=1 SV=5	0	25.255	22	7	248	5	281	31.1	5.01	129.4	7	2	3.57912	3.29278	3.56667	3.67521	3.58492	3.12852	4.18574	4.24847	3.96111
Q8TEU7	RAPGEF6	0.937472	0.0596134	0.871739	0.940947	-0.093153			-0.172068		PDZGEF2	Rap guanine nucleotide exchange factor 6 OS=Homo sapiens OX=9606 GN=RAPGEF6 PE=1 SV=2	0	25.246	6	8	41	7	1601	179.3	6.4	8.81	8	0	-2.93641	-1.8202	-1.46364	-2.1505	-2.49708	-2.19343	-1.46768	-1.93348	-2.53963
P09497	CLTB	1.34637	0.722122	0.189617	0.37778	0.429073			1.57839			Clathrin light chain B OS=Homo sapiens OX=9606 GN=CLTB PE=1 SV=1	0	25.236	18	6	114	6	229	25.2	4.64	50.55	6	0	1.9774	1.65725	1.62651	2.12607	1.86244	1.76636	1.4902	0.837666	1.64607
Q9NP58	ABCB6	0.930978	0.644839	0.226549	0.425538	-0.103181			-1.42774		MTABC3 PRP UMAT	ATP-binding cassette sub-family B member 6 OS=Homo sapiens OX=9606 GN=ABCB6 PE=1 SV=1	0	25.222	9	6	70	6	842	93.8	8.48	26.03	6	0	-0.622289	-0.714421	-0.823445	-0.360613	-0.584046	-0.582971	-0.649592	-0.669254	-0.531767
Q5SSJ5	HP1BP3	0.885231	0.551838	0.280648	0.501529	-0.175874			-1.24633			Heterochromatin protein 1-binding protein 3 OS=Homo sapiens OX=9606 GN=HP1BP3 PE=1 SV=1	0	25.176	13	7	81	7	553	61.2	9.67	39.47	7	0	2.02441	1.92516	2.11248	2.36911	2.1867	2.21088	2.4064	1.95773	2.22556
P25398	RPS12	1.71883	2.83634	0.00145766	0.0769778	0.781424			7.79984	+		Small ribosomal subunit protein eS12 OS=Homo sapiens OX=9606 GN=RPS12 PE=1 SV=3	0	25.151	25	5	231	5	132	14.5	7.21	107.78	5	0	4.49514	4.58299	4.5032	3.75786	3.56982	4.15927	3.90434	3.57216	3.76055
Q92615	LARP4B	1.14094	0.75599	0.175392	0.356467	0.19022			1.64463		KIAA0217 LARP5	La-related protein 4B OS=Homo sapiens OX=9606 GN=LARP4B PE=1 SV=3	0	25.15	9	7	78	7	738	80.5	6.92	23.88	7	0	0.103352	-0.108762	0.177495	-1.28523	-1.05683	-1.22242	-0.0961108	-0.281801	-0.0206642
P20908	COL5A1	0.674793	0.191355	0.643643	0.831471	-0.567482			-0.499514			Collagen alpha-1(V) chain OS=Homo sapiens OX=9606 GN=COL5A1 PE=1 SV=3	0	25.133	6	7	32	7	1838	183.4	5.06	9.33	7	0	-4.91659	-1.88382	-3.24389	-0.986059	-0.870602	-1.86938	-3.8962	-3.01719	-1.42847
P51617	IRAK1	3.53607	0.696453	0.201162	0.392759	1.82215			1.5283		IRAK	Interleukin-1 receptor-associated kinase 1 OS=Homo sapiens OX=9606 GN=IRAK1 PE=1 SV=2	0	25.123	13	6	81	6	712	76.5	6.62	29.96	6	0	-0.54389	-0.0894522	-1.06841	-0.550387	-0.127802	-2.07143	-0.904322	-1.59231	-4.67156
Q8WYP5	AHCTF1	2.00158	0.428182	0.373094	0.604247	1.00114			1.00188		ELYS TMBS62	Protein ELYS OS=Homo sapiens OX=9606 GN=AHCTF1 PE=1 SV=3	0	25.119	4	8	31	8	2266	252.3	6.6	7.69	8	0	-1.93889	-1.91372	-2.05775	-4.53064	-2.63309	-2.59987	-2.03844	-4.96641	-1.90894
Q01081	U2AF1	1.21734	1.20618	0.0622043	0.174143	0.283733			2.56657		U2AF35 U2AFBP	Splicing factor U2AF 35 kDa subunit OS=Homo sapiens OX=9606 GN=U2AF1 PE=1 SV=3	0	25.118	33	6	131	6	240	27.9	8.81	67.74	6	0	3.3758	3.33176	3.49233	3.17539	2.83673	2.78979	3.31337	3.04283	2.9925
Q9NR12	PDLIM7	1.02847	0.153435	0.702369	0.862541	0.040494			0.410658		ENIGMA	PDZ and LIM domain protein 7 OS=Homo sapiens OX=9606 GN=PDLIM7 PE=1 SV=1	0	25.11	18	7	80	7	457	49.8	8.41	31.02	7	0	-0.18303	0.0701572	-0.0844242	0.0553818	0.0237448	-0.0633244	-0.227238	-0.0894336	-0.00210762
P84095	RHOG	1.09381	0.277385	0.527977	0.740566	0.12936			0.690288		ARHG	Rho-related GTP-binding protein RhoG OS=Homo sapiens OX=9606 GN=RHOG PE=1 SV=1	0	25.07	30	5	126	5	191	21.3	8.12	49.04	5	0	1.24885	1.35702	0.802357	1.61499	1.10953	1.10284	1.08748	0.847961	1.08471
P00568	AK1	0.82082	0.450241	0.354617	0.592845	-0.284862			-1.04597			Adenylate kinase isoenzyme 1 OS=Homo sapiens OX=9606 GN=AK1 PE=1 SV=3	0	25.034	48	8	99	8	194	21.6	8.63	29.96	8	0	-1.53749	-0.855214	-0.715827	-1.39798	-1.57642	-1.25693	-0.947671	-0.637274	-0.669003
P29992	GNA11	1.05162	0.220313	0.602126	0.803877	0.0726195			0.56521		GA11	Guanine nucleotide-binding protein subunit alpha-11 OS=Homo sapiens OX=9606 GN=GNA11 PE=1 SV=2	0	25.031	20	7	110	5	359	42.1	5.69	51.67	7	2	0.698736	0.79071	0.712869	0.758842	0.756282	1.11558	0.875423	0.441631	0.667403
Q15020	SART3	1.20402	0.433641	0.368434	0.603865	0.267861			1.01282		KIAA0156 TIP110	Squamous cell carcinoma antigen recognized by T-cells 3 OS=Homo sapiens OX=9606 GN=SART3 PE=1 SV=1	0	24.987	9	7	103	7	963	109.9	5.57	36.35	7	0	1.32538	1.47356	0.717314	1.35091	1.42493	1.59408	1.08099	0.655218	0.976456
O75477	ERLIN1	1.40241	0.0979575	0.798073	0.902875	0.487908			0.273412		C10orf69 KE04 KEO4 SPFH1	Erlin-1 OS=Homo sapiens OX=9606 GN=ERLIN1 PE=1 SV=2	0	24.976	21	7	95	4	348	39.1	7.87	45.36	7	0	-1.95467	-6.52846	-5.94246	-0.136563	-2.2188	-2.23125	-3.18246	-6.44029	-6.26656
Q8TC12	RDH11	1.14703	0.739789	0.182059	0.368514	0.197897			1.61292		ARSDR1 PSDR1 SDR7C1	Retinol dehydrogenase 11 OS=Homo sapiens OX=9606 GN=RDH11 PE=1 SV=2	0	24.967	23	6	81	6	318	35.4	8.82	39	6	0	1.39768	1.53396	1.24181	1.63492	1.74888	1.81467	1.30134	1.01661	1.26181
Q13765	NACA	1.45852	0.914901	0.121646	0.268381	0.544507			1.95934			Nascent polypeptide-associated complex subunit alpha OS=Homo sapiens OX=9606 GN=NACA PE=1 SV=1	0	24.951	20	4	112	3	215	23.4	4.56	60.49	4	0	3.14202	3.29603	3.33845	2.21578	2.39477	2.39099	3.08965	2.18703	2.86631
E9PAV3	NACA	1.45852	0.914901	0.121646	0.268112	0.544507			1.95934			Nascent polypeptide-associated complex subunit alpha, muscle-specific form OS=Homo sapiens OX=9606 GN=NACA PE=1 SV=1	0	24.951	2	4	112	3	2078	205.3	9.58	60.49	4	1	3.14202	3.29603	3.33845	2.21578	2.39477	2.39099	3.08965	2.18703	2.86631
P78318	IGBP1	0.541782	1.61345	0.0243528	0.114066	-0.884217			-3.52442		IBP1	Immunoglobulin-binding protein 1 OS=Homo sapiens OX=9606 GN=IGBP1 PE=1 SV=1	0	24.946	22	6	61	6	339	39.2	5.38	20.38	6	0	-1.04179	-1.17749	-1.05089	-1.3822	-1.32599	-2.27837	-0.484086	0.286846	-0.420281
P20020	ATP2B1	4.62622	0.658185	0.219692	0.419489	2.20984			1.45373		PMCA1	Plasma membrane calcium-transporting ATPase 1 OS=Homo sapiens OX=9606 GN=ATP2B1 PE=1 SV=4	0	24.917	6	8	98	2	1220	134.6	5.91	38.04	8	1	-1.37812	-0.140354	-0.923119	-1.37764	-0.74959	-1.3363	-1.24961	-5.95519	-1.8663
Q9NYU2	UGGT1	5.7963	1.23081	0.0587749	0.170128	2.53513			2.6204		GT UGCGL1 UGGT UGT1 UGTR	UDP-glucose:glycoprotein glucosyltransferase 1 OS=Homo sapiens OX=9606 GN=UGGT1 PE=1 SV=3	0	24.916	7	7	44	7	1555	177.1	5.63	8.4	7	0	-1.69465	-0.656009	-1.97893	-0.885833	-2.16704	-0.634492	-5.41331	-2.37845	-4.14323
P54760	EPHB4	1.1244	0.174427	0.669226	0.844971	0.169162			0.460279		HTK MYK1 TYRO11	Ephrin type-B receptor 4 OS=Homo sapiens OX=9606 GN=EPHB4 PE=1 SV=2	0	24.903	10	8	79	7	987	108.2	6.9	41.2	8	0	-1.15723	-1.30165	-0.48382	-1.13733	-0.539934	-0.648957	-0.796356	-1.67455	-0.97928
Q5TA45	INTS11	0.996138	0.022728	0.949013	0.976279	-0.00558197			-0.0680488		CPSF3L RC68	Integrator complex subunit 11 OS=Homo sapiens OX=9606 GN=INTS11 PE=1 SV=2	0	24.895	11	6	72	6	600	67.6	8.06	23.56	6	0	0.295143	0.267487	0.29043	-1.02625	0.300721	-0.0359044	0.438168	0.156763	0.274875
P61764	STXBP1	0.938297	0.346304	0.450501	0.67735	-0.0918831			-0.835372		UNC18A	Syntaxin-binding protein 1 OS=Homo sapiens OX=9606 GN=STXBP1 PE=1 SV=1	0	24.865	12	7	72	7	594	67.5	6.96	35.89	7	0	0.26181	0.1679	0.246595	0.672528	0.643321	0.704286	0.464365	0.111371	0.376219
A1L0T0	ILVBL	1.21654	0.530533	0.294759	0.520188	0.282786			1.20459		AHAS HACL2	2-hydroxyacyl-CoA lyase 2 OS=Homo sapiens OX=9606 GN=ILVBL PE=1 SV=2	0	24.842	17	6	62	6	632	67.8	8.15	16.31	6	0	0.0455589	0.312333	0.0745231	-0.0742596	-4.7366	-0.394007	-0.0738488	-0.546223	0.204128
P34896	SHMT1	1.1737	0.212885	0.612513	0.812985	0.231063			0.548518			Serine hydroxymethyltransferase, cytosolic OS=Homo sapiens OX=9606 GN=SHMT1 PE=1 SV=1	0	24.828	17	7	50	7	483	53	7.71	20.08	7	0	-1.79709	-1.11406	-1.01635	-1.3941	-0.715437	-1.11061	-0.862945	-1.79296	-1.96477
O75822	EIF3J	1.50351	0.804592	0.156822	0.328203	0.588332			1.74009		EIF3S1	Eukaryotic translation initiation factor 3 subunit J OS=Homo sapiens OX=9606 GN=EIF3J PE=1 SV=2	0	24.825	21	7	78	7	258	29	4.83	36.49	7	0	1.90692	1.47684	2.29411	2.34422	2.36185	2.16141	1.06855	1.7884	1.05592
Q96TA1	NIBAN2	0.47658	0.286628	0.516859	0.730899	-1.06921			-0.710081		C9orf88 FAM129B	Protein Niban 2 OS=Homo sapiens OX=9606 GN=NIBAN2 PE=1 SV=3	0	24.801	12	7	46	7	746	84.1	6.19	13.81	7	0	-5.0094	-0.391912	-3.01705	-4.00545	-1.16657	-1.16932	-1.11444	-3.11943	-0.97687
Q96QR8	PURB	0.986699	0.0237445	0.946794	0.974932	-0.0193187			-0.0710159			Transcriptional activator protein Pur-beta OS=Homo sapiens OX=9606 GN=PURB PE=1 SV=3	0	24.796	26	7	71	6	312	33.2	5.43	26.23	7	0	-0.477871	-1.3026	-0.83653	-0.37792	-0.746761	-1.2843	-0.619973	-1.07088	-0.868191
P00450	CP	0.343751	2.11055	0.00775265	0.0872045	-1.54056			-4.95155	+		Ceruloplasmin OS=Homo sapiens OX=9606 GN=CP PE=1 SV=2	0	24.784	7	6	44	6	1065	122.1	5.72	13.82	6	0	-3.41794	-3.61644	-3.11802	-4.43565	-3.17482	-2.9532	-2.09477	-1.29357	-2.14236
Q5F1R6	DNAJC21	0.700481	1.00831	0.0981058	0.232351	-0.513581			-2.14887		DNAJA5	DnaJ homolog subfamily C member 21 OS=Homo sapiens OX=9606 GN=DNAJC21 PE=1 SV=2	0	24.76	15	6	29	6	531	62	5.47	11.31	6	0	-0.91737	-1.03444	-0.654589	-5.276	-1.62553	-1.93944	-0.674079	0.0435186	-0.435099
Q9Y512	SAMM50	1.98644	0.561401	0.274536	0.493831	0.990186			1.26504		SAM50	Sorting and assembly machinery component 50 homolog OS=Homo sapiens OX=9606 GN=SAMM50 PE=1 SV=3	0	24.753	18	6	89	6	469	51.9	6.9	41.16	6	0	1.18067	0.603511	0.656986	1.37206	1.3141	1.6755	0.982067	0.0984746	-1.60993
Q04206	RELA	0.709575	1.09747	0.0798969	0.206049	-0.494972			-2.33405		NFKB3	Transcription factor p65 OS=Homo sapiens OX=9606 GN=RELA PE=1 SV=2	0	24.743	14	7	84	7	551	60.2	5.68	31.1	7	0	-0.75009	-0.323493	-0.157558	-0.561118	-0.224098	-0.444753	0.0345783	0.308606	-0.0894089
P07910	HNRNPC	1.01562	0.0640956	0.862789	0.938475	0.0223547			0.18424		HNRPC	Heterogeneous nuclear ribonucleoproteins C1/C2 OS=Homo sapiens OX=9606 GN=HNRNPC PE=1 SV=4	0	24.741	16	6	350	5	306	33.7	5.08	206.22	6	1	2.7338	2.69296	2.95741	3.43548	3.45969	3.24368	2.79289	2.91568	2.60853
Q86W92	PPFIBP1	1.11177	0.210977	0.615209	0.814524	0.152861			0.544216		KIAA1230	Liprin-beta-1 OS=Homo sapiens OX=9606 GN=PPFIBP1 PE=1 SV=2	0	24.734	10	7	47	7	1011	114	5.55	11.68	7	0	-1.42502	-1.75915	-2.03652	-1.52023	-0.802222	-1.35043	-2.32898	-1.65426	-1.69603
Q5T0D9	TPRG1L	0.950747	0.17558	0.667451	0.844932	-0.0728669			-0.462972		FAM79A MOVER	Tumor protein p63-regulated gene 1-like protein OS=Homo sapiens OX=9606 GN=TPRG1L PE=1 SV=1	0	24.732	38	7	71	7	272	30.2	7.34	24.74	7	0	-0.522769	-0.394051	-0.631371	-1.00311	-0.7841	-0.749145	-0.163146	-0.546091	-0.620354
Q9NX20	MRPL16	0.8323	1.52821	0.0296339	0.117929	-0.264825			-3.31074			Large ribosomal subunit protein uL16m OS=Homo sapiens OX=9606 GN=MRPL16 PE=1 SV=1	0	24.719	30	6	101	6	251	28.4	10.13	36.86	6	0	0.893393	0.861941	0.74877	1.32881	1.11978	1.11595	1.23137	1.05291	1.01429
Q9BYG3	NIFK	1.28424	0.893854	0.127687	0.280754	0.360912			1.91717		MKI67IP NOPP34	MKI67 FHA domain-interacting nucleolar phosphoprotein OS=Homo sapiens OX=9606 GN=NIFK PE=1 SV=1	0	24.689	21	5	48	5	293	34.2	9.88	14.55	5	0	-1.70904	-1.7856	-1.95319	-2.30419	-2.06776	-2.0744	-2.40243	-1.83481	-2.29332
P51648	ALDH3A2	1.16169	1.20931	0.061758	0.173554	0.216231			2.57338		ALDH10 FALDH	Aldehyde dehydrogenase family 3 member A2 OS=Homo sapiens OX=9606 GN=ALDH3A2 PE=1 SV=1	0	24.617	18	7	109	6	485	54.8	7.88	37.94	7	0	-0.0636542	0.0686333	-0.202483	0.342973	0.31421	0.246176	-0.221027	-0.309865	-0.315306
O94808	GFPT2	1.07606	0.274034	0.532066	0.742718	0.105762			0.683084			Glutamine--fructose-6-phosphate aminotransferase [isomerizing] 2 OS=Homo sapiens OX=9606 GN=GFPT2 PE=1 SV=3	0	24.611	12	7	63	4	682	76.9	7.37	28.08	7	0	-1.74664	-2.13481	-1.69954	-4.27467	-2.08251	-2.25239	-2.0795	-1.98159	-1.83719
P27448	MARK3	1.02192	0.100733	0.792989	0.900864	0.0312791			0.28052		CTAK1 EMK2	MAP/microtubule affinity-regulating kinase 3 OS=Homo sapiens OX=9606 GN=MARK3 PE=1 SV=5	0	24.603	9	7	78	5	753	84.4	9.57	33.17	7	0	-2.14766	-2.01995	-2.31977	-3.00086	-2.93876	-2.97918	-2.19861	-2.31232	-2.07029
Q07021	C1QBP	1.1675	0.179183	0.661937	0.845301	0.223427			0.471368		GC1QBP HABP1 SF2P32	Complement component 1 Q subcomponent-binding protein, mitochondrial OS=Homo sapiens OX=9606 GN=C1QBP PE=1 SV=1	0	24.595	30	4	106	4	282	31.3	4.84	44.31	4	0	1.42439	1.94515	1.89736	1.08606	1.35306	1.39689	1.4568	2.33599	0.803814
P40938	RFC3	1.76305	1.253	0.0558471	0.168257	0.818076			2.66929			Replication factor C subunit 3 OS=Homo sapiens OX=9606 GN=RFC3 PE=1 SV=2	0	24.584	25	6	76	6	356	40.5	8.34	30.19	6	0	0.179333	0.947754	0.532777	-0.0762921	0.141711	0.278817	0.100792	-0.63092	-0.264236
P62899	RPL31	1.07112	0.163518	0.68625	0.85275	0.0991226			0.434631			Large ribosomal subunit protein eL31 OS=Homo sapiens OX=9606 GN=RPL31 PE=1 SV=1	0	24.567	41	6	112	6	125	14.5	10.54	51.85	6	0	3.83763	3.46342	3.48067	3.56179	3.19064	3.2368	3.65979	3.11063	3.71393
O43719	HTATSF1	0.553836	1.00597	0.0986356	0.232717	-0.852469			-2.14407			17S U2 SnRNP complex component HTATSF1 OS=Homo sapiens OX=9606 GN=HTATSF1 PE=1 SV=1	0	24.548	12	7	56	7	755	85.8	4.4	16.15	7	0	-1.90644	-2.14993	-0.950069	-1.321	-2.30399	-1.04209	-1.10779	-0.579673	-0.761576
O43837	IDH3B	1.16278	0.603113	0.249395	0.456343	0.217573			1.34645			Isocitrate dehydrogenase [NAD] subunit beta, mitochondrial OS=Homo sapiens OX=9606 GN=IDH3B PE=1 SV=2	0	24.538	12	5	63	5	385	42.2	8.46	23.63	5	0	0.505251	0.57048	0.857731	0.587977	0.687953	0.650114	0.620359	0.453074	0.20731
Q6IAA8	LAMTOR1	1.04729	0.160125	0.691631	0.856152	0.0666617			0.426595		C11orf59 PDRO	Ragulator complex protein LAMTOR1 OS=Homo sapiens OX=9606 GN=LAMTOR1 PE=1 SV=2	0	24.515	31	5	66	5	161	17.7	5.15	29.72	5	0	1.17585	1.16921	1.12256	1.53249	1.22121	1.57088	1.31061	0.789704	1.16732
Q70UQ0	IKBIP	1.78074	0.742646	0.180865	0.365906	0.832475			1.6185		IKIP	Inhibitor of nuclear factor kappa-B kinase-interacting protein OS=Homo sapiens OX=9606 GN=IKBIP PE=1 SV=1	0	24.505	23	7	70	7	350	39.3	9.17	22.63	7	0	-2.16841	-1.28201	-1.82908	0.890269	1.13417	1.11188	-2.0951	-3.47984	-2.20199
Q12805	EFEMP1	0.558031	1.86667	0.0135934	0.102281	-0.841584			-4.20934	+	FBLN3 FBNL	EGF-containing fibulin-like extracellular matrix protein 1 OS=Homo sapiens OX=9606 GN=EFEMP1 PE=1 SV=2	0	24.503	14	5	192	5	493	54.6	5.07	96.47	5	0	1.90019	1.64815	2.06917	1.64159	2.07892	2.14269	2.68756	3.0003	2.4544
P17097	ZNF7	2.80235	1.64222	0.0227916	0.111791	1.48664			3.59835	+	KOX4	Zinc finger protein 7 OS=Homo sapiens OX=9606 GN=ZNF7 PE=1 SV=1	0	24.461	10	7	117	2	686	77.8	8.29	37	7	3	-2.54395	-3.8854	-2.79063	-3.04724	-6.09254	-3.39359	-4.60731	-4.56025	-4.51235
Q9Y3D9	MRPS23	0.813902	1.14508	0.0716015	0.190507	-0.297073			-2.4349			Small ribosomal subunit protein mS23 OS=Homo sapiens OX=9606 GN=MRPS23 PE=1 SV=2	0	24.431	36	6	119	6	190	21.8	8.9	63.1	6	0	1.3643	1.3565	1.58513	0.87388	0.884759	0.308808	1.58519	1.91349	1.69847
P61006	RAB8A	1.13012	0.428734	0.37262	0.603641	0.176471			1.00299		MEL RAB8	Ras-related protein Rab-8A OS=Homo sapiens OX=9606 GN=RAB8A PE=1 SV=1	0	24.426	24	5	68	5	207	23.7	9.07	34.12	5	0	-0.171144	-0.123089	-0.230806	-0.532352	1.1907	-0.315592	-0.0753251	-0.67056	-0.308565
Q9BRD0	BUD13	1.03466	0.0932686	0.806736	0.908065	0.04915			0.261338			BUD13 homolog OS=Homo sapiens OX=9606 GN=BUD13 PE=1 SV=1	0	24.423	15	7	57	7	619	70.5	9.86	21.14	7	0	-2.65762	-2.38726	-2.56321	-2.86324	-2.67968	-2.53294	-2.3987	-2.43103	-2.92581
Q99460	PSMD1	1.25921	1.26032	0.0549141	0.166256	0.332514			2.6855			26S proteasome non-ATPase regulatory subunit 1 OS=Homo sapiens OX=9606 GN=PSMD1 PE=1 SV=2	0	24.416	9	7	48	7	953	105.8	5.39	9.58	7	0	-0.460648	-0.470632	-0.206405	-0.407475	-0.148757	-0.230035	-0.870551	-0.700546	-0.564131
P21796	VDAC1	1.09336	0.276533	0.529013	0.740818	0.128772			0.688459		VDAC	Voltage-dependent anion-selective channel protein 1 OS=Homo sapiens OX=9606 GN=VDAC1 PE=1 SV=2	0	24.402	28	6	96	6	283	30.8	8.54	38.07	6	0	0.311787	0.391428	-0.20516	0.752615	1.29729	1.20302	0.0371291	0.0308923	0.0437162
O43237	DYNC1LI2	1.04163	0.110513	0.77533	0.890818	0.0588397			0.305349		DNCLI2 LIC2	Cytoplasmic dynein 1 light intermediate chain 2 OS=Homo sapiens OX=9606 GN=DYNC1LI2 PE=1 SV=1	0	24.365	18	6	98	5	492	54.1	6.38	38.95	6	0	-0.129527	-0.132745	-0.0949698	-0.407791	-0.449346	-0.248795	-0.480336	-0.232542	0.179116
P27144	AK4	0.932049	1.40692	0.0391815	0.137544	-0.101523			-3.01953		AK3 AK3L1	Adenylate kinase 4, mitochondrial OS=Homo sapiens OX=9606 GN=AK4 PE=1 SV=1	0	24.358	33	6	67	6	223	25.3	8.4	22.59	6	0	0.757956	0.849493	0.795678	1.7478	1.68734	1.53704	0.942866	0.874877	0.889951
P35240	NF2	1.00678	0.0342079	0.924256	0.963409	0.00975414			0.101208		SCH	Merlin OS=Homo sapiens OX=9606 GN=NF2 PE=1 SV=1	0	24.32	14	8	59	8	595	69.6	6.47	26.48	8	0	-1.66851	-1.49839	-1.37216	-1.56755	-1.44333	-1.83732	-1.48639	-1.60993	-1.472
Q9Y2K1	ZBTB1	1.24307	0.750451	0.177643	0.361038	0.31391			1.63378		KIAA0997	Zinc finger and BTB domain-containing protein 1 OS=Homo sapiens OX=9606 GN=ZBTB1 PE=1 SV=3	0	24.316	10	6	31	6	713	82	6.39	4.98	6	0	-1.64804	-1.89696	-1.64896	-1.54387	-1.7901	-1.80382	-1.80979	-2.3834	-1.9425
P24941	CDK2	1.4484	0.744098	0.180261	0.365542	0.534464			1.62135		CDKN2	Cyclin-dependent kinase 2 OS=Homo sapiens OX=9606 GN=CDK2 PE=1 SV=2	0	24.287	27	7	104	6	298	33.9	8.68	36.87	7	0	-0.648319	-1.56882	-1.64097	-0.565798	-0.568979	-0.663294	-1.98105	-1.75886	-1.7216
Q9HCP0	CSNK1G1	1.10117	0.159702	0.692306	0.856258	0.139038			0.42559			Casein kinase I isoform gamma-1 OS=Homo sapiens OX=9606 GN=CSNK1G1 PE=1 SV=1	0	24.285	14	6	117	2	422	48.5	9.01	52.88	6	0	-2.76339	-2.56437	-3.56479	-2.69057	-2.03968	-2.15327	-3.24773	-2.87579	-3.18615
Q9Y295	DRG1	0.844759	0.149772	0.708318	0.864014	-0.243388			-0.401882		NEDD3	Developmentally-regulated GTP-binding protein 1 OS=Homo sapiens OX=9606 GN=DRG1 PE=1 SV=1	0	24.17	24	7	74	7	367	40.5	8.9	24.12	7	0	-1.87992	-0.436156	-0.323784	-0.643567	-1.34975	-0.815178	0.0250504	-0.829842	-1.10491
Q0PNE2	ELP6	0.442122	1.2617	0.0547391	0.166925	-1.17748			-2.68857		ATP1 C3orf75 TMEM103	Elongator complex protein 6 OS=Homo sapiens OX=9606 GN=ELP6 PE=1 SV=1	0	24.138	27	7	111	7	266	29.8	6.84	42.99	7	0	-1.08507	-1.93187	-0.638514	-1.78894	-2.06184	-0.934678	-0.164074	0.384562	-0.343502
P07741	APRT	1.14419	0.611861	0.244422	0.448572	0.194332			1.3635			Adenine phosphoribosyltransferase OS=Homo sapiens OX=9606 GN=APRT PE=1 SV=2	0	24.134	34	4	137	4	180	19.6	6.02	61.06	4	0	2.18261	1.97881	1.81383	2.47125	2.59881	2.52354	1.84908	1.61407	1.92911
[truncated: 1,670 more rows]

## Sheet: FC>1.5,FDR<0.05
Accession	Gene Names (primary)	Fold_Change C33A_C-IgG	-Log Student's T-test p-value C33A_C-IgG	p value	Student's T-test q-value C33A_C-IgG	Student's T-test Difference C33A_C-IgG	Student's T-test Significant C33A_C-IgG	Student's T-test significant	Student's T-test Test statistic C33A_C-IgG	FDR<0.05, S0=0.1, Significant	Gene Names (synonym)	Description	Exp. q-value: Combined	Sum PEP Score	Coverage [%]	# Peptides	# PSMs	# Unique Peptides	# AAs	MW [kDa]	calc. pI	Score CHIMERYS Identification: CHIMERYS Identification	# Peptides (by Search Engine): CHIMERYS Identification	# Razor Peptides	Abundance: C33A_1	Abundance: C33A_2	Abundance: C33A_3	Abundance: C93_1	Abundance: C93_2	Abundance: C93_3	Abundance: C-IgG_1	Abundance: C-IgG_2	Abundance: C-IgG_3
[truncated: 100 more rows]

[truncated: 1 more sheets: FC>1.5, p<0.05]
