# Supplementary material for: RCN1 couple KIF14 and promotes the malignant progression of cervical cancer via the PI3K-mTOR pathway
Source: Research Square preprint supplement (doi:10.21203/rs.3.rs-6303169/v1), 2025-05-05
Supplement: Supplementary file 4 [file f8886c5752240323e75c665a.xlsx]

## Sheet: co_existed riched proteins
Protein ID	Reviewed	Gene Names (primary)	Gene Names (synonym)	Entry Name	Protein names	Organism	Length	Catalytic activity	Interacts with	Gene Ontology (biological process)	Gene Ontology (cellular component)	Gene Ontology (molecular function)	Gene Ontology IDs	Gene Ontology (GO)	Intramembrane	Subcellular location [CC]	Transmembrane	PubMed ID	Domain [FT]	Motif	Protein families
O14578	reviewed	CIT	CRIK KIAA0949 STK21	CTRO_HUMAN	Citron Rho-interacting kinase (CRIK) (EC 2.7.11.1) (Serine/threonine-protein kinase 21)	Homo sapiens (Human)	2027	CATALYTIC ACTIVITY: Reaction=ATP + L-seryl-[protein] = ADP + H(+) + O-phospho-L-seryl-[protein]; Xref=Rhea:RHEA:17989, Rhea:RHEA-COMP:9863, Rhea:RHEA-COMP:11604, ChEBI:CHEBI:15378, ChEBI:CHEBI:29999, ChEBI:CHEBI:30616, ChEBI:CHEBI:83421, ChEBI:CHEBI:456216; EC=2.7.11.1; CATALYTIC ACTIVITY: Reaction=ATP + L-threonyl-[protein] = ADP + H(+) + O-phospho-L-threonyl-[protein]; Xref=Rhea:RHEA:46608, Rhe…		generation of neurons [GO:0048699]; mitotic cell cycle [GO:0000278]; mitotic cytokinesis [GO:0000281]; negative regulation of hippo signaling [GO:0035331]; neuron apoptotic process [GO:0051402]; phosphorylation [GO:0016310]; positive regulation of cytokinesis [GO:0032467]	cytosol [GO:0005829]; membrane [GO:0016020]	ATP binding [GO:0005524]; metal ion binding [GO:0046872]; PDZ domain binding [GO:0030165]; protein kinase binding [GO:0019901]; protein serine kinase activity [GO:0106310]; protein serine/threonine kinase activity [GO:0004674]; protein serine/threonine kinase inhibitor activity [GO:0030291]; scaffold protein binding [GO:0097110]; SH3 domain binding [GO:0017124]; transcription coactivator binding …	GO:0000278; GO:0000281; GO:0001223; GO:0004674; GO:0005524; GO:0005829; GO:0016020; GO:0016310; GO:0017124; GO:0019901; GO:0030165; GO:0030291; GO:0032467; GO:0035331; GO:0046872; GO:0048699; GO:0051402; GO:0097110; GO:0106310	cytosol [GO:0005829]; membrane [GO:0016020]; ATP binding [GO:0005524]; metal ion binding [GO:0046872]; PDZ domain binding [GO:0030165]; protein kinase binding [GO:0019901]; protein serine kinase activity [GO:0106310]; protein serine/threonine kinase activity [GO:0004674]; protein serine/threonine kinase inhibitor activity [GO:0030291]; scaffold protein binding [GO:0097110]; SH3 domain binding [GO…		SUBCELLULAR LOCATION: Cytoplasm {ECO:0000250}.		15983625; 10231032; 16541075; 16431929; 16236794; 17488780; 18669648; 19413330; 19690332; 19608861; 20068231; 21269460; 21457715; 21406692; 22814378; 23186163; 27453578; 27453579; 27503289; 27519304; 17344846	DOMAIN 97..360; /note="Protein kinase"; /evidence="ECO:0000255|PROSITE-ProRule:PRU00159"; DOMAIN 361..431; /note="AGC-kinase C-terminal"; /evidence="ECO:0000255|PROSITE-ProRule:PRU00618"; DOMAIN 1443..1563; /note="PH"; /evidence="ECO:0000255|PROSITE-ProRule:PRU00145"; DOMAIN 1591..1881; /note="CNH"; /evidence="ECO:0000255|PROSITE-ProRule:PRU00795"	MOTIF 1953..1958; /note="SH3-binding"; /evidence="ECO:0000255"	Protein kinase superfamily, AGC Ser/Thr protein kinase family
P42695	reviewed	NCAPD3	CAPD3 KIAA0056	CNDD3_HUMAN	Condensin-2 complex subunit D3 (Non-SMC condensin II complex subunit D3) (hCAP-D3)	Homo sapiens (Human)	1498		P07814; P04406; Q6IBW4	cell division [GO:0051301]; meiotic chromosome condensation [GO:0010032]; mitotic chromosome condensation [GO:0007076]; positive regulation of chromosome condensation [GO:1905821]; positive regulation of chromosome segregation [GO:0051984]; positive regulation of chromosome separation [GO:1905820]	condensed chromosome, centromeric region [GO:0000779]; condensed nuclear chromosome [GO:0000794]; condensin complex [GO:0000796]; membrane [GO:0016020]; nucleoplasm [GO:0005654]; pericentric heterochromatin [GO:0005721]	histone binding [GO:0042393]; methylated histone binding [GO:0035064]	GO:0000779; GO:0000794; GO:0000796; GO:0005654; GO:0005721; GO:0007076; GO:0010032; GO:0016020; GO:0035064; GO:0042393; GO:0051301; GO:0051984; GO:1905820; GO:1905821	condensed chromosome, centromeric region [GO:0000779]; condensed nuclear chromosome [GO:0000794]; condensin complex [GO:0000796]; membrane [GO:0016020]; nucleoplasm [GO:0005654]; pericentric heterochromatin [GO:0005721]; histone binding [GO:0042393]; methylated histone binding [GO:0035064]; cell division [GO:0051301]; meiotic chromosome condensation [GO:0010032]; mitotic chromosome condensation […		SUBCELLULAR LOCATION: Nucleus {ECO:0000269|PubMed:14532007}.		7584044; 16554811; 15489334; 14532007; 17081983; 18220336; 18691976; 18669648; 19690332; 20068231; 21269460; 21406692; 23186163; 23728299; 27737959
Q86XI2	reviewed	NCAPG2	LUZP5	CNDG2_HUMAN	Condensin-2 complex subunit G2 (Chromosome-associated protein G2) (CAP-G2) (hCAP-G2) (Leucine zipper protein 5) (Non-SMC condensin II complex subunit G2)	Homo sapiens (Human)	1143		Q6IBW4	cell division [GO:0051301]; chromosome condensation [GO:0030261]; erythrocyte differentiation [GO:0030218]; inner cell mass cell proliferation [GO:0001833]; mitotic sister chromatid segregation [GO:0000070]; positive regulation of chromosome condensation [GO:1905821]; positive regulation of chromosome segregation [GO:0051984]; positive regulation of chromosome separation [GO:1905820]; transcripti…	condensed nuclear chromosome [GO:0000794]; condensin complex [GO:0000796]; membrane [GO:0016020]; nuclear speck [GO:0016607]; nucleoplasm [GO:0005654]; nucleus [GO:0005634]	bHLH transcription factor binding [GO:0043425]; methylated histone binding [GO:0035064]	GO:0000070; GO:0000794; GO:0000796; GO:0001833; GO:0005634; GO:0005654; GO:0006366; GO:0016020; GO:0016607; GO:0030218; GO:0030261; GO:0035064; GO:0043425; GO:0051301; GO:0051984; GO:1905820; GO:1905821	condensed nuclear chromosome [GO:0000794]; condensin complex [GO:0000796]; membrane [GO:0016020]; nuclear speck [GO:0016607]; nucleoplasm [GO:0005654]; nucleus [GO:0005634]; bHLH transcription factor binding [GO:0043425]; methylated histone binding [GO:0035064]; cell division [GO:0051301]; chromosome condensation [GO:0030261]; erythrocyte differentiation [GO:0030218]; inner cell mass cell prolife…		SUBCELLULAR LOCATION: Nucleus {ECO:0000269|PubMed:14532007}.		17974005; 12690205; 15489334; 14702039; 14532007; 18691976; 18669648; 20068231; 21269460; 23186163; 30609410
P26599	reviewed	PTBP1	PTB	PTBP1_HUMAN	Polypyrimidine tract-binding protein 1 (PTB) (57 kDa RNA-binding protein PPTB-1) (Heterogeneous nuclear ribonucleoprotein I) (hnRNP I)	Homo sapiens (Human)	557		Q15365; Q96PU8; P98175; P23246; P09012; Q7ZYE9; PRO_0000037940 [P29991]; PRO_0000308465 [P29991]; P98175; Q13148	IRES-dependent viral translational initiation [GO:0075522]; mRNA processing [GO:0006397]; negative regulation of mRNA splicing, via spliceosome [GO:0048025]; negative regulation of muscle cell differentiation [GO:0051148]; negative regulation of neuron differentiation [GO:0045665]; negative regulation of RNA splicing [GO:0033119]; neurogenesis [GO:0022008]; positive regulation of calcineurin-NFAT…	extracellular exosome [GO:0070062]; membrane [GO:0016020]; nucleolus [GO:0005730]; nucleoplasm [GO:0005654]; nucleus [GO:0005634]	DNA binding [GO:0003677]; mRNA binding [GO:0003729]; poly-pyrimidine tract binding [GO:0008187]; pre-mRNA binding [GO:0036002]; RNA binding [GO:0003723]	GO:0000381; GO:0003677; GO:0003723; GO:0003729; GO:0005634; GO:0005654; GO:0005730; GO:0006397; GO:0008187; GO:0008380; GO:0016020; GO:0022008; GO:0033119; GO:0035307; GO:0036002; GO:0043484; GO:0045595; GO:0045665; GO:0045944; GO:0048025; GO:0051148; GO:0070062; GO:0070886; GO:0075522	extracellular exosome [GO:0070062]; membrane [GO:0016020]; nucleolus [GO:0005730]; nucleoplasm [GO:0005654]; nucleus [GO:0005634]; DNA binding [GO:0003677]; mRNA binding [GO:0003729]; poly-pyrimidine tract binding [GO:0008187]; pre-mRNA binding [GO:0036002]; RNA binding [GO:0003723]; IRES-dependent viral translational initiation [GO:0075522]; mRNA processing [GO:0006397]; negative regulation of m…		SUBCELLULAR LOCATION: Nucleus.		1906035; 1906036; 1641332; 15057824; 15489334; 1286667; 10653975; 11003644; 15009664; 14966131; 16260624; 17081983; 17924679; 18669648; 19413330; 20010808; 20068231; 21269460; 21518792; 21518806; 21406692; 22223895; 22814378; 23186163; 24275569; 25944712; 28112733; 10856256; 15341728; 16179478; 16362043	DOMAIN 59..143; /note="RRM 1"; /evidence="ECO:0000255|PROSITE-ProRule:PRU00176"; DOMAIN 184..260; /note="RRM 2"; /evidence="ECO:0000255|PROSITE-ProRule:PRU00176"; DOMAIN 363..437; /note="RRM 3"; /evidence="ECO:0000255|PROSITE-ProRule:PRU00176"; DOMAIN 480..555; /note="RRM 4"; /evidence="ECO:0000255|PROSITE-ProRule:PRU00176"
Q8WUQ7	reviewed	CACTIN	C19orf29	CATIN_HUMAN	Splicing factor Cactin (Renal carcinoma antigen NY-REN-24)	Homo sapiens (Human)	758		P49760	cellular response to interleukin-1 [GO:0071347]; cellular response to lipopolysaccharide [GO:0071222]; cellular response to tumor necrosis factor [GO:0071356]; innate immune response [GO:0045087]; mRNA cis splicing, via spliceosome [GO:0045292]; mRNA splicing, via spliceosome [GO:0000398]; negative regulation of canonical NF-kappaB signal transduction [GO:0043124]; negative regulation of innate i…	catalytic step 2 spliceosome [GO:0071013]; cytoplasm [GO:0005737]; cytosol [GO:0005829]; nuclear speck [GO:0016607]; nucleoplasm [GO:0005654]; nucleus [GO:0005634]; spliceosomal complex [GO:0005681]	RNA binding [GO:0003723]	GO:0000398; GO:0001933; GO:0003723; GO:0005634; GO:0005654; GO:0005681; GO:0005737; GO:0005829; GO:0016607; GO:0031665; GO:0032088; GO:0032688; GO:0032717; GO:0032720; GO:0034122; GO:0043124; GO:0045087; GO:0045292; GO:0045824; GO:0060339; GO:0071013; GO:0071222; GO:0071347; GO:0071356	catalytic step 2 spliceosome [GO:0071013]; cytoplasm [GO:0005737]; cytosol [GO:0005829]; nuclear speck [GO:0016607]; nucleoplasm [GO:0005654]; nucleus [GO:0005634]; spliceosomal complex [GO:0005681]; RNA binding [GO:0003723]; cellular response to interleukin-1 [GO:0071347]; cellular response to lipopolysaccharide [GO:0071222]; cellular response to tumor necrosis factor [GO:0071356]; innate immune…		SUBCELLULAR LOCATION: Nucleus {ECO:0000269|PubMed:20829348, ECO:0000269|PubMed:26363554, ECO:0000269|PubMed:28062851}. Cytoplasm, cytosol {ECO:0000269|PubMed:26363554}. Note=Nuclear localization with a speckled expression pattern in some cells. Colocalizes with NFKBIL1 in the nucleus. {ECO:0000269|PubMed:20829348}.		15057824; 15489334; 10508479; 11991638; 20829348; 23186163; 24275569; 26363554; 28062851; 28112733; 34365507			CACTIN family
P49757	reviewed	NUMB	C14orf41	NUMB_HUMAN	Protein numb homolog (h-Numb) (Protein S171)	Homo sapiens (Human)	651		P35222; P00533; P42566; Q00987; Q96D71; P04637; Q05513; P35222; P05067	adherens junction organization [GO:0034332]; axonogenesis [GO:0007409]; lateral ventricle development [GO:0021670]; negative regulation of protein localization to plasma membrane [GO:1903077]; neuroblast division in subventricular zone [GO:0021849]; positive regulation of cell migration [GO:0030335]; positive regulation of neurogenesis [GO:0050769]; regulation of postsynaptic neurotransmitter rec…	apical part of cell [GO:0045177]; basolateral plasma membrane [GO:0016323]; clathrin-coated pit [GO:0005905]; clathrin-coated vesicle [GO:0030136]; cytoplasm [GO:0005737]; cytoplasmic vesicle [GO:0031410]; early endosome [GO:0005769]; endosome membrane [GO:0010008]; focal adhesion [GO:0005925]; glutamatergic synapse [GO:0098978]; plasma membrane [GO:0005886]	alpha-catenin binding [GO:0045294]; beta-catenin binding [GO:0008013]; cadherin binding [GO:0045296]	GO:0005737; GO:0005769; GO:0005886; GO:0005905; GO:0005925; GO:0007409; GO:0008013; GO:0010008; GO:0016323; GO:0021670; GO:0021849; GO:0030136; GO:0030335; GO:0031410; GO:0034332; GO:0045177; GO:0045294; GO:0045296; GO:0050769; GO:0098978; GO:0099149; GO:1903077	apical part of cell [GO:0045177]; basolateral plasma membrane [GO:0016323]; clathrin-coated pit [GO:0005905]; clathrin-coated vesicle [GO:0030136]; cytoplasm [GO:0005737]; cytoplasmic vesicle [GO:0031410]; early endosome [GO:0005769]; endosome membrane [GO:0010008]; focal adhesion [GO:0005925]; glutamatergic synapse [GO:0098978]; plasma membrane [GO:0005886]; alpha-catenin binding [GO:0045294]; b…		SUBCELLULAR LOCATION: Cell membrane {ECO:0000269|PubMed:18657069}; Peripheral membrane protein {ECO:0000305|PubMed:18657069}; Cytoplasmic side {ECO:0000305|PubMed:18657069}. Endosome membrane {ECO:0000269|PubMed:18657069}; Peripheral membrane protein {ECO:0000305|PubMed:18657069}; Cytoplasmic side {ECO:0000305|PubMed:18657069}. Note=Localizes to perinuclear endosomes in an AAK1-dependent manner. …		9303539; 10468633; 21486681; 14702039; 12508121; 15489334; 7596406; 11752454; 12775724; 14670962; 17081983; 16964243; 18669648; 18657069; 19690332; 20068231; 21269460; 21406692; 23186163; 24275569	DOMAIN 33..193; /note="PID"; /evidence="ECO:0000255|PROSITE-ProRule:PRU00148"
Q15058	reviewed	KIF14	KIAA0042	KIF14_HUMAN	Kinesin-like protein KIF14	Homo sapiens (Human)	1648		O46385	activation of protein kinase activity [GO:0032147]; cell division [GO:0051301]; cell proliferation in forebrain [GO:0021846]; cerebellar cortex development [GO:0021695]; cerebellar granular layer structural organization [GO:0021685]; cerebellar Purkinje cell layer structural organization [GO:0021693]; cerebral cortex development [GO:0021987]; establishment of protein localization [GO:0045184]; hi…	cytosol [GO:0005829]; Flemming body [GO:0090543]; kinesin complex [GO:0005871]; membrane [GO:0016020]; microtubule [GO:0005874]; midbody [GO:0030496]; nucleus [GO:0005634]; spindle midzone [GO:0051233]	ATP binding [GO:0005524]; ATP hydrolysis activity [GO:0016887]; microtubule binding [GO:0008017]; microtubule motor activity [GO:0003777]; PDZ domain binding [GO:0030165]; plus-end-directed microtubule motor activity [GO:0008574]; protein kinase binding [GO:0019901]; tubulin binding [GO:0015631]	GO:0001558; GO:0003777; GO:0005524; GO:0005634; GO:0005829; GO:0005871; GO:0005874; GO:0007018; GO:0007080; GO:0008017; GO:0008284; GO:0008574; GO:0010389; GO:0015631; GO:0016020; GO:0016887; GO:0019901; GO:0021685; GO:0021693; GO:0021695; GO:0021766; GO:0021772; GO:0021846; GO:0021987; GO:0030155; GO:0030165; GO:0030334; GO:0030496; GO:0031146; GO:0031641; GO:0032147; GO:0032467; GO:0032487; GO:…	cytosol [GO:0005829]; Flemming body [GO:0090543]; kinesin complex [GO:0005871]; membrane [GO:0016020]; microtubule [GO:0005874]; midbody [GO:0030496]; nucleus [GO:0005634]; spindle midzone [GO:0051233]; ATP binding [GO:0005524]; ATP hydrolysis activity [GO:0016887]; microtubule binding [GO:0008017]; microtubule motor activity [GO:0003777]; PDZ domain binding [GO:0030165]; plus-end-directed microt…		SUBCELLULAR LOCATION: Nucleus {ECO:0000269|PubMed:16431929}. Cytoplasm {ECO:0000269|PubMed:16648480}. Cytoplasm, cytoskeleton, spindle {ECO:0000269|PubMed:16431929}. Midbody {ECO:0000269|PubMed:16431929, ECO:0000269|PubMed:20309963, ECO:0000269|PubMed:28892560}. Note=Nuclear localization observed during interphase (PubMed:16431929). Nuclear localization triggered by entry into mitosis (PubMed:166…		7584044; 16710414; 15489334; 15843429; 17081983; 16431929; 16820410; 16648480; 18669648; 20309963; 20068231; 21269460; 23209302; 23186163; 24854087; 24784001; 24128419; 28892560; 29343805	DOMAIN 358..701; /note="Kinesin motor"; /evidence="ECO:0000255|PROSITE-ProRule:PRU00283"; DOMAIN 825..891; /note="FHA"		TRAFAC class myosin-kinesin ATPase superfamily, Kinesin family
Q9Y2R4	reviewed	DDX52	ROK1	DDX52_HUMAN	Probable ATP-dependent RNA helicase DDX52 (EC 3.6.4.13) (ATP-dependent RNA helicase ROK1-like) (DEAD box protein 52)	Homo sapiens (Human)	599	CATALYTIC ACTIVITY: Reaction=ATP + H2O = ADP + H(+) + phosphate; Xref=Rhea:RHEA:13065, ChEBI:CHEBI:15377, ChEBI:CHEBI:15378, ChEBI:CHEBI:30616, ChEBI:CHEBI:43474, ChEBI:CHEBI:456216; EC=3.6.4.13;		maturation of SSU-rRNA [GO:0030490]	membrane [GO:0016020]; nucleolus [GO:0005730]; nucleoplasm [GO:0005654]	ATP binding [GO:0005524]; ATP hydrolysis activity [GO:0016887]; RNA binding [GO:0003723]; RNA helicase activity [GO:0003724]	GO:0003723; GO:0003724; GO:0005524; GO:0005654; GO:0005730; GO:0016020; GO:0016887; GO:0030490	membrane [GO:0016020]; nucleolus [GO:0005730]; nucleoplasm [GO:0005654]; ATP binding [GO:0005524]; ATP hydrolysis activity [GO:0016887]; RNA binding [GO:0003723]; RNA helicase activity [GO:0003724]; maturation of SSU-rRNA [GO:0030490]		SUBCELLULAR LOCATION: Nucleus, nucleolus {ECO:0000269|PubMed:12429849}.		14702039; 16625196; 15489334; 11124703; 12429849; 17525332; 18669648; 19608861; 21269460; 20941364	DOMAIN 196..374; /note="Helicase ATP-binding"; /evidence="ECO:0000255|PROSITE-ProRule:PRU00541"; DOMAIN 385..546; /note="Helicase C-terminal"; /evidence="ECO:0000255|PROSITE-ProRule:PRU00542"	MOTIF 165..193; /note="Q motif"; MOTIF 318..321; /note="DEAD box"	DEAD box helicase family, DDX52/ROK1 subfamily
P26358	reviewed	DNMT1	AIM CXXC9 DNMT	DNMT1_HUMAN	DNA (cytosine-5)-methyltransferase 1 (Dnmt1) (EC 2.1.1.37) (CXXC-type zinc finger protein 9) (DNA methyltransferase HsaI) (DNA MTase HsaI) (M.HsaI) (MCMT)	Homo sapiens (Human)	1616	CATALYTIC ACTIVITY: Reaction=a 2'-deoxycytidine in DNA + S-adenosyl-L-methionine = a 5-methyl-2'-deoxycytidine in DNA + H(+) + S-adenosyl-L-homocysteine; Xref=Rhea:RHEA:13681, Rhea:RHEA-COMP:11369, Rhea:RHEA-COMP:11370, ChEBI:CHEBI:15378, ChEBI:CHEBI:57856, ChEBI:CHEBI:59789, ChEBI:CHEBI:85452, ChEBI:CHEBI:85454; EC=2.1.1.37; Evidence={ECO:0000255|PROSITE-ProRule:PRU10018};	P31749; P35222; Q96JK2; O75530; Q15910; Q96JM7; P48552; P09874; Q9NRD5; Q8WTS6; Q96EB6; Q96T88; Q77UV9; Q9QR71	cellular response to amino acid stimulus [GO:0071230]; cellular response to bisphenol A [GO:1903926]; DNA methylation on cytosine within a CG sequence [GO:0010424]; DNA methylation-dependent heterochromatin formation [GO:0006346]; DNA-templated transcription [GO:0006351]; negative regulation of gene expression [GO:0010629]; negative regulation of gene expression via CpG island methylation [GO:004…	female germ cell nucleus [GO:0001674]; nucleoplasm [GO:0005654]; nucleus [GO:0005634]; pericentric heterochromatin [GO:0005721]; replication fork [GO:0005657]	DNA (cytosine-5-)-methyltransferase activity [GO:0003886]; DNA binding [GO:0003677]; DNA-methyltransferase activity [GO:0009008]; methyl-CpG binding [GO:0008327]; promoter-specific chromatin binding [GO:1990841]; RNA binding [GO:0003723]; zinc ion binding [GO:0008270]	GO:0000122; GO:0001674; GO:0003677; GO:0003723; GO:0003886; GO:0005634; GO:0005654; GO:0005657; GO:0005721; GO:0006346; GO:0006351; GO:0008270; GO:0008327; GO:0009008; GO:0010424; GO:0010628; GO:0010629; GO:0043045; GO:0044027; GO:0071230; GO:1903926; GO:1904707; GO:1905460; GO:1905931; GO:1990841	female germ cell nucleus [GO:0001674]; nucleoplasm [GO:0005654]; nucleus [GO:0005634]; pericentric heterochromatin [GO:0005721]; replication fork [GO:0005657]; DNA (cytosine-5-)-methyltransferase activity [GO:0003886]; DNA binding [GO:0003677]; DNA-methyltransferase activity [GO:0009008]; methyl-CpG binding [GO:0008327]; promoter-specific chromatin binding [GO:1990841]; RNA binding [GO:0003723]; …		SUBCELLULAR LOCATION: Nucleus {ECO:0000269|PubMed:12145218, ECO:0000269|PubMed:24492612}. Note=Localized to the perinucleolar region. {ECO:0000269|PubMed:24492612}.		1594447; 8940105; 15057824; 15489334; 10449766; 10753866; 9302295; 10947852; 10888872; 10888886; 10325416; 12145218; 17081983; 16357870; 17200670; 18754681; 18413740; 18220336; 18438403; 18669648; 19413330; 19450230; 19173286; 19690332; 19608861; 20068231; 21269460; 21565170; 21947282; 21151116; 21745816; 21406692; 23186163; 24623306; 24492612; 24275569; 25772364; 28112733; 29691401; 32051553; 21…	DOMAIN 16..109; /note="DMAP1-binding"; /evidence="ECO:0000255|PROSITE-ProRule:PRU01260"; DOMAIN 755..880; /note="BAH 1"; /evidence="ECO:0000255|PROSITE-ProRule:PRU00370"; DOMAIN 972..1100; /note="BAH 2"; /evidence="ECO:0000255|PROSITE-ProRule:PRU00370"; DOMAIN 1139..1599; /note="SAM-dependent MTase C5-type"; /evidence="ECO:0000255|PROSITE-ProRule:PRU01016"	MOTIF 177..205; /note="Nuclear localization signal"; /evidence="ECO:0000255"	Class I-like SAM-binding methyltransferase superfamily, C5-methyltransferase family
Q9BY44	reviewed	EIF2A		EIF2A_HUMAN	Eukaryotic translation initiation factor 2A (eIF-2A) (65 kDa eukaryotic translation initiation factor 2A) [Cleaved into: Eukaryotic translation initiation factor 2A, N-terminally processed]	Homo sapiens (Human)	585			positive regulation of signal transduction [GO:0009967]; regulation of translation [GO:0006417]; response to amino acid starvation [GO:1990928]; ribosome assembly [GO:0042255]; SREBP signaling pathway [GO:0032933]; translational initiation [GO:0006413]	blood microparticle [GO:0072562]; cytoplasm [GO:0005737]; cytosolic small ribosomal subunit [GO:0022627]; eukaryotic translation initiation factor 2 complex [GO:0005850]; extracellular space [GO:0005615]	cadherin binding [GO:0045296]; mRNA binding [GO:0003729]; ribosome binding [GO:0043022]; translation initiation factor activity [GO:0003743]; tRNA binding [GO:0000049]	GO:0000049; GO:0003729; GO:0003743; GO:0005615; GO:0005737; GO:0005850; GO:0006413; GO:0006417; GO:0009967; GO:0022627; GO:0032933; GO:0042255; GO:0043022; GO:0045296; GO:0072562; GO:1990928	blood microparticle [GO:0072562]; cytoplasm [GO:0005737]; cytosolic small ribosomal subunit [GO:0022627]; eukaryotic translation initiation factor 2 complex [GO:0005850]; extracellular space [GO:0005615]; cadherin binding [GO:0045296]; mRNA binding [GO:0003729]; ribosome binding [GO:0043022]; translation initiation factor activity [GO:0003743]; tRNA binding [GO:0000049]; positive regulation of si…				12133843; 14702039; 16641997; 15489334; 17081983; 18669648; 19413330; 19690332; 20068231; 21269460; 21406692; 22814378; 23186163; 24275569			WD repeat EIF2A family
P45974	reviewed	USP5	ISOT	UBP5_HUMAN	Ubiquitin carboxyl-terminal hydrolase 5 (EC 3.4.19.12) (Deubiquitinating enzyme 5) (Isopeptidase T) (Ubiquitin thioesterase 5) (Ubiquitin-specific-processing protease 5)	Homo sapiens (Human)	858	CATALYTIC ACTIVITY: Reaction=Thiol-dependent hydrolysis of ester, thioester, amide, peptide and isopeptide bonds formed by the C-terminal Gly of ubiquitin (a 76-residue protein attached to proteins as an intracellular targeting signal).; EC=3.4.19.12;	Q15038; P54727; O75528; Q8WW34; Q9NWF9; Q8N0X7; Q8WW34-2; O14773; Q9BZR9; P0CG47	positive regulation of proteasomal ubiquitin-dependent protein catabolic process [GO:0032436]; protein deubiquitination [GO:0016579]; protein K48-linked deubiquitination [GO:0071108]; protein ubiquitination [GO:0016567]; proteolysis [GO:0006508]	cytosol [GO:0005829]; lysosome [GO:0005764]; nucleus [GO:0005634]	cysteine-type deubiquitinase activity [GO:0004843]; cysteine-type endopeptidase activity [GO:0004197]; ubiquitin binding [GO:0043130]; zinc ion binding [GO:0008270]	GO:0004197; GO:0004843; GO:0005634; GO:0005764; GO:0005829; GO:0006508; GO:0008270; GO:0016567; GO:0016579; GO:0032436; GO:0043130; GO:0071108	cytosol [GO:0005829]; lysosome [GO:0005764]; nucleus [GO:0005634]; cysteine-type deubiquitinase activity [GO:0004843]; cysteine-type endopeptidase activity [GO:0004197]; ubiquitin binding [GO:0043130]; zinc ion binding [GO:0008270]; positive regulation of proteasomal ubiquitin-dependent protein catabolic process [GO:0032436]; protein deubiquitination [GO:0016579]; protein K48-linked deubiquitinat…				7498549; 8723724; 9074930; 15489334; 7851534; 16964243; 18482987; 18669648; 19413330; 19098288; 19690332; 20068231; 21269460; 22216260; 22223895; 22814378; 23186163; 24275569; 16564012	DOMAIN 326..856; /note="USP"; DOMAIN 654..695; /note="UBA 1"; /evidence="ECO:0000255|PROSITE-ProRule:PRU00212"; DOMAIN 722..762; /note="UBA 2"; /evidence="ECO:0000255|PROSITE-ProRule:PRU00212"		Peptidase C19 family
Q9NVI1	reviewed	FANCI	KIAA1794	FANCI_HUMAN	Fanconi anemia group I protein (Protein FACI)	Homo sapiens (Human)	1328		Q9Y5B0; Q9BXW9	cell cycle [GO:0007049]; interstrand cross-link repair [GO:0036297]; positive regulation of protein ubiquitination [GO:0031398]	chromatin [GO:0000785]; cytoplasm [GO:0005737]; cytosol [GO:0005829]; DNA repair complex [GO:1990391]; membrane [GO:0016020]; nucleoplasm [GO:0005654]	DNA binding [GO:0003677]; DNA polymerase binding [GO:0070182]	GO:0000785; GO:0003677; GO:0005654; GO:0005737; GO:0005829; GO:0007049; GO:0016020; GO:0031398; GO:0036297; GO:0070182; GO:1990391	chromatin [GO:0000785]; cytoplasm [GO:0005737]; cytosol [GO:0005829]; DNA repair complex [GO:1990391]; membrane [GO:0016020]; nucleoplasm [GO:0005654]; DNA binding [GO:0003677]; DNA polymerase binding [GO:0070182]; cell cycle [GO:0007049]; interstrand cross-link repair [GO:0036297]; positive regulation of protein ubiquitination [GO:0031398]		SUBCELLULAR LOCATION: Nucleus {ECO:0000269|PubMed:17412408, ECO:0000269|PubMed:17460694, ECO:0000269|PubMed:19465922}. Cytoplasm {ECO:0000269|PubMed:18445686}. Note=Observed in spots localized in pairs on the sister chromatids of mitotic chromosome arms and not centromeres, one on each chromatids. These foci coincide with common fragile sites. They are frequently interlinked through BLM-associate…		17412408; 17460694; 16572171; 15489334; 14702039; 11347906; 16964243; 17452773; 17525332; 18445686; 18691976; 19111657; 18669648; 19589784; 19465922; 20603015; 19995904; 20068231; 21269460; 21775430; 23186163; 25862789
Q9BSF8	reviewed	BTBD10	GMRP1	BTBDA_HUMAN	BTB/POZ domain-containing protein 10 (Glucose metabolism-related protein 1)	Homo sapiens (Human)	475		Q13618	phosphatidylinositol 3-kinase/protein kinase B signal transduction [GO:0043491]; positive regulation of phosphorylation [GO:0042327]; type B pancreatic cell proliferation [GO:0044342]	cytoplasm [GO:0005737]; fibrillar center [GO:0001650]; nucleoplasm [GO:0005654]		GO:0001650; GO:0005654; GO:0005737; GO:0042327; GO:0043491; GO:0044342	cytoplasm [GO:0005737]; fibrillar center [GO:0001650]; nucleoplasm [GO:0005654]; phosphatidylinositol 3-kinase/protein kinase B signal transduction [GO:0043491]; positive regulation of phosphorylation [GO:0042327]; type B pancreatic cell proliferation [GO:0044342]		SUBCELLULAR LOCATION: Nucleus {ECO:0000269|PubMed:15556295}. Cytoplasm {ECO:0000250|UniProtKB:Q80X66}. Note=Colocalizes with KCTD20 in filamentous structures. {ECO:0000250|UniProtKB:Q80X66}.		15556295; 14702039; 17974005; 16554811; 15489334; 21267538; 21406692	DOMAIN 167..241; /note="BTB"
P25398	reviewed	RPS12		RS12_HUMAN	Small ribosomal subunit protein eS12 (40S ribosomal protein S12)	Homo sapiens (Human)	132		P42858	cytoplasmic translation [GO:0002181]; positive regulation of canonical Wnt signaling pathway [GO:0090263]; ribosomal small subunit biogenesis [GO:0042274]; translation [GO:0006412]	cytoplasm [GO:0005737]; cytosol [GO:0005829]; cytosolic ribosome [GO:0022626]; cytosolic small ribosomal subunit [GO:0022627]; Golgi apparatus [GO:0005794]; intracellular membrane-bounded organelle [GO:0043231]; membrane [GO:0016020]; nucleolus [GO:0005730]; nucleoplasm [GO:0005654]; small-subunit processome [GO:0032040]	RNA binding [GO:0003723]; structural constituent of ribosome [GO:0003735]	GO:0002181; GO:0003723; GO:0003735; GO:0005654; GO:0005730; GO:0005737; GO:0005794; GO:0005829; GO:0006412; GO:0016020; GO:0022626; GO:0022627; GO:0032040; GO:0042274; GO:0043231; GO:0090263	cytoplasm [GO:0005737]; cytosol [GO:0005829]; cytosolic ribosome [GO:0022626]; cytosolic small ribosomal subunit [GO:0022627]; Golgi apparatus [GO:0005794]; intracellular membrane-bounded organelle [GO:0043231]; membrane [GO:0016020]; nucleolus [GO:0005730]; nucleoplasm [GO:0005654]; small-subunit processome [GO:0032040]; RNA binding [GO:0003723]; structural constituent of ribosome [GO:0003735]; …		SUBCELLULAR LOCATION: Nucleus, nucleolus {ECO:0000269|PubMed:34516797}.		1861993; 11875025; 14702039; 14574404; 15489334; 8706699; 9582194; 14654843; 19413330; 20068231; 21269460; 22223895; 22814378; 24524803; 24275569; 25944712; 23636399; 34516797			Eukaryotic ribosomal protein eS12 family
Q13627	reviewed	DYRK1A	DYRK MNB MNBH	DYR1A_HUMAN	Dual specificity tyrosine-phosphorylation-regulated kinase 1A (EC 2.7.11.23) (EC 2.7.12.1) (Dual specificity YAK1-related kinase) (HP86) (Protein kinase minibrain homolog) (MNBH) (hMNB)	Homo sapiens (Human)	763	CATALYTIC ACTIVITY: Reaction=ATP + L-seryl-[protein] = ADP + H(+) + O-phospho-L-seryl-[protein]; Xref=Rhea:RHEA:17989, Rhea:RHEA-COMP:9863, Rhea:RHEA-COMP:11604, ChEBI:CHEBI:15378, ChEBI:CHEBI:29999, ChEBI:CHEBI:30616, ChEBI:CHEBI:83421, ChEBI:CHEBI:456216; EC=2.7.12.1; Evidence={ECO:0000269|PubMed:20981014, ECO:0000269|PubMed:22998443, ECO:0000269|PubMed:23665168, ECO:0000269|PubMed:24239188, EC…	P61962; Q5T749; Q9BRK4; P06400; P28749; Q12933; Q12815; Q13627-1; P31946	amyloid-beta formation [GO:0034205]; circadian rhythm [GO:0007623]; negative regulation of DNA damage response, signal transduction by p53 class mediator [GO:0043518]; negative regulation of DNA methylation-dependent heterochromatin formation [GO:0090310]; negative regulation of microtubule polymerization [GO:0031115]; negative regulation of mRNA splicing, via spliceosome [GO:0048025]; nervous sy…	axon [GO:0030424]; cytoplasm [GO:0005737]; cytoskeleton [GO:0005856]; dendrite [GO:0030425]; nuclear speck [GO:0016607]; nucleoplasm [GO:0005654]; nucleus [GO:0005634]; ribonucleoprotein complex [GO:1990904]	actin binding [GO:0003779]; ATP binding [GO:0005524]; cytoskeletal protein binding [GO:0008092]; histone H3T45 kinase activity [GO:0140857]; identical protein binding [GO:0042802]; non-membrane spanning protein tyrosine kinase activity [GO:0004715]; protein kinase activity [GO:0004672]; protein self-association [GO:0043621]; protein serine kinase activity [GO:0106310]; protein serine/threonine ki…	GO:0003713; GO:0003779; GO:0004672; GO:0004674; GO:0004712; GO:0004713; GO:0004715; GO:0005524; GO:0005634; GO:0005654; GO:0005737; GO:0005856; GO:0006468; GO:0007399; GO:0007623; GO:0008092; GO:0008353; GO:0015631; GO:0016607; GO:0018105; GO:0018107; GO:0018108; GO:0030424; GO:0030425; GO:0031115; GO:0033120; GO:0034205; GO:0036289; GO:0038083; GO:0042802; GO:0043518; GO:0043621; GO:0045893; GO:…	axon [GO:0030424]; cytoplasm [GO:0005737]; cytoskeleton [GO:0005856]; dendrite [GO:0030425]; nuclear speck [GO:0016607]; nucleoplasm [GO:0005654]; nucleus [GO:0005634]; ribonucleoprotein complex [GO:1990904]; actin binding [GO:0003779]; ATP binding [GO:0005524]; cytoskeletal protein binding [GO:0008092]; histone H3T45 kinase activity [GO:0140857]; identical protein binding [GO:0042802]; non-membr…		SUBCELLULAR LOCATION: Nucleus {ECO:0000269|PubMed:20167603, ECO:0000269|PubMed:23415227, ECO:0000269|PubMed:25620562}. Nucleus speckle {ECO:0000250|UniProtKB:Q61214}.		8975710; 8872470; 8769099; 9037601; 10329007; 9503011; 14500717; 14593110; 15592455; 18691976; 19266028; 19690332; 20167603; 21294719; 21127067; 23160955; 23415227; 23186163; 23864635; 24275569; 31024071; 30773093; 20981014; 22998443; 24239188; 25620562; 29849146; 23665168; 17344846	DOMAIN 159..479; /note="Protein kinase"; /evidence="ECO:0000255|PROSITE-ProRule:PRU00159"	MOTIF 117..134; /note="Bipartite nuclear localization signal"; /evidence="ECO:0000255"	Protein kinase superfamily, CMGC Ser/Thr protein kinase family, MNB/DYRK subfamily
Q9H5V9	reviewed	STEEP1	CXorf56	STEEP_HUMAN	STING ER exit protein (STEEP)	Homo sapiens (Human)	222		O14929; Q9HAQ2; Q4G0R1; Q9NQG5	endoplasmic reticulum membrane organization [GO:0090158]; endoplasmic reticulum to Golgi vesicle-mediated transport [GO:0006888]	cell body [GO:0044297]; centrosome [GO:0005813]; cytoplasm [GO:0005737]; nucleoplasm [GO:0005654]; nucleus [GO:0005634]		GO:0005634; GO:0005654; GO:0005737; GO:0005813; GO:0006888; GO:0044297; GO:0090158	cell body [GO:0044297]; centrosome [GO:0005813]; cytoplasm [GO:0005737]; nucleoplasm [GO:0005654]; nucleus [GO:0005634]; endoplasmic reticulum membrane organization [GO:0090158]; endoplasmic reticulum to Golgi vesicle-mediated transport [GO:0006888]		SUBCELLULAR LOCATION: Nucleus {ECO:0000269|PubMed:29374277, ECO:0000269|PubMed:32690950}. Cytoplasm {ECO:0000269|PubMed:32690950}. Note=Detected in the nucleus and cell soma of various neuronal types. {ECO:0000250|UniProtKB:Q8VDP2}.		14702039; 15772651; 15489334; 21269460; 29374277; 32690950; 32929276			STEEP1 family
Q9UN81	reviewed	L1RE1	LRE1	LORF1_HUMAN	LINE-1 retrotransposable element ORF1 protein (L1ORF1p) (LINE retrotransposable element 1) (LINE1 retrotransposable element 1)	Homo sapiens (Human)	338		Q9UN81; Q92900; Q8TE30	retrotransposition [GO:0032197]	cytoplasm [GO:0005737]; cytoplasmic ribonucleoprotein granule [GO:0036464]; cytoplasmic stress granule [GO:0010494]; nucleolus [GO:0005730]; ribonucleoprotein complex [GO:1990904]	identical protein binding [GO:0042802]; nucleotide binding [GO:0000166]; single-stranded DNA binding [GO:0003697]; single-stranded RNA binding [GO:0003727]	GO:0000166; GO:0003697; GO:0003727; GO:0005730; GO:0005737; GO:0010494; GO:0032197; GO:0036464; GO:0042802; GO:1990904	cytoplasm [GO:0005737]; cytoplasmic ribonucleoprotein granule [GO:0036464]; cytoplasmic stress granule [GO:0010494]; nucleolus [GO:0005730]; ribonucleoprotein complex [GO:1990904]; identical protein binding [GO:0042802]; nucleotide binding [GO:0000166]; single-stranded DNA binding [GO:0003697]; single-stranded RNA binding [GO:0003727]; retrotransposition [GO:0032197]		SUBCELLULAR LOCATION: Nucleus, nucleolus {ECO:0000269|PubMed:17562864}. Cytoplasm {ECO:0000269|PubMed:27428332}. Cytoplasm, Cytoplasmic ribonucleoprotein granule {ECO:0000269|PubMed:16183655, ECO:0000269|PubMed:30122351}. Cytoplasm, Stress granule {ECO:0000269|PubMed:17562864, ECO:0000269|PubMed:23093941}. Note=Colocalizes with its encoding RNA in cytoplasmic ribonucleoprotein particle (PubMed:16…		10401005; 10655552; 8945518; 11158327; 16183655; 17562864; 21937507; 23093941; 28806172; 30122351; 19139409; 21822284; 27428332			Transposase 22 family
Q9Y463	reviewed	DYRK1B	MIRK	DYR1B_HUMAN	Dual specificity tyrosine-phosphorylation-regulated kinase 1B (EC 2.7.12.1) (Minibrain-related kinase) (Mirk protein kinase)	Homo sapiens (Human)	629	CATALYTIC ACTIVITY: Reaction=ATP + L-seryl-[protein] = ADP + H(+) + O-phospho-L-seryl-[protein]; Xref=Rhea:RHEA:17989, Rhea:RHEA-COMP:9863, Rhea:RHEA-COMP:11604, ChEBI:CHEBI:15378, ChEBI:CHEBI:29999, ChEBI:CHEBI:30616, ChEBI:CHEBI:83421, ChEBI:CHEBI:456216; EC=2.7.12.1; Evidence={ECO:0000269|PubMed:22998443}; CATALYTIC ACTIVITY: Reaction=ATP + L-threonyl-[protein] = ADP + H(+) + O-phospho-L-threo…	P61962; O15499; P20823; P08238; Q9BRK4; P46734; Q9H0N5; Q96S59; P06400; P28749; Q12815; P62258	adipose tissue development [GO:0060612]; DNA repair [GO:0006281]; myoblast fusion [GO:0007520]; positive regulation of DNA-templated transcription [GO:0045893]; protein phosphorylation [GO:0006468]	chromosome [GO:0005694]; nucleolus [GO:0005730]; nucleoplasm [GO:0005654]; nucleus [GO:0005634]	ATP binding [GO:0005524]; protein kinase activity [GO:0004672]; protein serine kinase activity [GO:0106310]; protein serine/threonine kinase activity [GO:0004674]; protein serine/threonine/tyrosine kinase activity [GO:0004712]; protein tyrosine kinase activity [GO:0004713]; transcription coactivator activity [GO:0003713]	GO:0003713; GO:0004672; GO:0004674; GO:0004712; GO:0004713; GO:0005524; GO:0005634; GO:0005654; GO:0005694; GO:0005730; GO:0006281; GO:0006468; GO:0007520; GO:0045893; GO:0060612; GO:0106310	chromosome [GO:0005694]; nucleolus [GO:0005730]; nucleoplasm [GO:0005654]; nucleus [GO:0005634]; ATP binding [GO:0005524]; protein kinase activity [GO:0004672]; protein serine kinase activity [GO:0106310]; protein serine/threonine kinase activity [GO:0004674]; protein serine/threonine/tyrosine kinase activity [GO:0004712]; protein tyrosine kinase activity [GO:0004713]; transcription coactivator a…		SUBCELLULAR LOCATION: Nucleus {ECO:0000269|PubMed:32611815, ECO:0000269|PubMed:33469661}. Nucleus, nucleolus {ECO:0000269|PubMed:33469661}. Chromosome {ECO:0000269|PubMed:32611815}. Note=Localizes to sites of double-strand breaks (DSBs) following DNA damage. {ECO:0000269|PubMed:32611815}.		9918863; 10910078; 15057824; 15489334; 11980910; 14500717; 14593110; 22998443; 24827035; 33469661; 32611815; 17344846	DOMAIN 111..431; /note="Protein kinase"; /evidence="ECO:0000255|PROSITE-ProRule:PRU00159"	MOTIF 69..86; /note="Bipartite nuclear localization signal"; /evidence="ECO:0000255"	Protein kinase superfamily, CMGC Ser/Thr protein kinase family, MNB/DYRK subfamily
Q7LGA3	reviewed	HS2ST1	HS2ST KIAA0448	HS2ST_HUMAN	Heparan sulfate 2-O-sulfotransferase 1 (2-O-sulfotransferase) (2OST) (EC 2.8.2.-)	Homo sapiens (Human)	356		O14908-2; Q92876	gene expression [GO:0010467]; heparan sulfate proteoglycan biosynthetic process, enzymatic modification [GO:0015015]; heparan sulfate proteoglycan biosynthetic process, polysaccharide chain biosynthetic process [GO:0015014]; heparin metabolic process [GO:0030202]; ureteric bud formation [GO:0060676]	Golgi membrane [GO:0000139]; membrane [GO:0016020]	heparan sulfate 2-O-sulfotransferase activity [GO:0004394]	GO:0000139; GO:0004394; GO:0010467; GO:0015014; GO:0015015; GO:0016020; GO:0030202; GO:0060676	Golgi membrane [GO:0000139]; membrane [GO:0016020]; heparan sulfate 2-O-sulfotransferase activity [GO:0004394]; gene expression [GO:0010467]; heparan sulfate proteoglycan biosynthetic process, enzymatic modification [GO:0015015]; heparan sulfate proteoglycan biosynthetic process, polysaccharide chain biosynthetic process [GO:0015014]; heparin metabolic process [GO:0030202]; ureteric bud formation…		SUBCELLULAR LOCATION: Golgi apparatus membrane {ECO:0000250}; Single-pass type II membrane protein {ECO:0000250}.	TRANSMEM 12..28; /note="Helical; Signal-anchor for type II membrane protein"; /evidence="ECO:0000255"	9455484; 14702039; 16710414; 15489334; 21269460; 33159882			Sulfotransferase 3 family
P13612	reviewed	ITGA4	CD49D	ITA4_HUMAN	Integrin alpha-4 (CD49 antigen-like family member D) (Integrin alpha-IV) (VLA-4 subunit alpha) (CD antigen CD49d)	Homo sapiens (Human)	1032		Q8IZP0-2; P05556; P26010; P49023; P84092	axonogenesis involved in innervation [GO:0060385]; B cell differentiation [GO:0030183]; cell adhesion mediated by integrin [GO:0033627]; cell-cell adhesion [GO:0098609]; cell-cell adhesion in response to extracellular stimulus [GO:0140039]; cell-cell adhesion mediated by integrin [GO:0033631]; cell-matrix adhesion [GO:0007160]; cell-matrix adhesion involved in ameboidal cell migration [GO:0003366…	cell surface [GO:0009986]; external side of plasma membrane [GO:0009897]; extracellular exosome [GO:0070062]; focal adhesion [GO:0005925]; growth cone [GO:0030426]; integrin alpha4-beta1 complex [GO:0034668]; integrin alpha4-beta7 complex [GO:0034669]; integrin complex [GO:0008305]; membrane [GO:0016020]; neuronal cell body [GO:0043025]; plasma membrane [GO:0005886]	cell adhesion molecule binding [GO:0050839]; coreceptor activity [GO:0015026]; fibronectin binding [GO:0001968]; integrin binding [GO:0005178]; metal ion binding [GO:0046872]; protein antigen binding [GO:1990405]	GO:0001968; GO:0002387; GO:0003366; GO:0005178; GO:0005886; GO:0005925; GO:0007159; GO:0007160; GO:0007229; GO:0008305; GO:0009897; GO:0009986; GO:0015026; GO:0016020; GO:0030183; GO:0030426; GO:0033627; GO:0033631; GO:0034113; GO:0034446; GO:0034668; GO:0034669; GO:0035987; GO:0043025; GO:0043113; GO:0045906; GO:0046872; GO:0050839; GO:0050901; GO:0050904; GO:0060385; GO:0070062; GO:0071345; GO:…	cell surface [GO:0009986]; external side of plasma membrane [GO:0009897]; extracellular exosome [GO:0070062]; focal adhesion [GO:0005925]; growth cone [GO:0030426]; integrin alpha4-beta1 complex [GO:0034668]; integrin alpha4-beta7 complex [GO:0034669]; integrin complex [GO:0008305]; membrane [GO:0016020]; neuronal cell body [GO:0043025]; plasma membrane [GO:0005886]; cell adhesion molecule bindin…		SUBCELLULAR LOCATION: Membrane {ECO:0000255}; Single-pass type I membrane protein {ECO:0000255}.	TRANSMEM 978..1001; /note="Helical"; /evidence="ECO:0000255"	2788572; 1551405; 8643114; 15815621; 15489334; 2034655; 3033641; 1730718; 9488735; 10604475; 11533025; 15466886; 18635536; 19064666; 19349973; 19690332; 23125415; 24275569; 25398877; 25944712; 35802072		MOTIF 606..616; /note="SG1"; MOTIF 1003..1007; /note="GFFKR motif"	Integrin alpha chain family
