# Supplementary material for: RCN1 couple KIF14 and promotes the malignant progression of cervical cancer via the PI3K-mTOR pathway
Source: Research Square preprint supplement (doi:10.21203/rs.3.rs-6303169/v1), 2025-05-05
Supplement: Supplementary file 5 [file fadba1d3198bcba32f98415e.xlsx]

## Sheet: T-tests_C93_vs_C33A
Protein ID	Gene Names (primary)	Fold_Change C33A_C93	-Log Student's T-test p-value C33A_C93	p value	Student's T-test q-value C33A_C93	Student's T-test Significant C33A_C93	Student's T-test significant	Student's T-test Difference C33A_C93	Student's T-test Test statistic C33A_C93	Significant，FDR<0.05, S0=0.1	Gene Names (synonym)	Description	Exp. q-value: Combined	Sum PEP Score	Coverage [%]	# Peptides	# PSMs	# Unique Peptides	# AAs	MW [kDa]	calc. pI	Score CHIMERYS Identification: CHIMERYS Identification	# Peptides (by Search Engine): CHIMERYS Identification	# Razor Peptides	Abundance: C33A_1	Abundance: C33A_2	Abundance: C33A_3	Abundance: C93_1	Abundance: C93_2	Abundance: C93_3	Abundance: C-IgG_1	Abundance: C-IgG_2	Abundance: C-IgG_3
P35579	MYH9	0.699689	0.957777	0.110211	0.151678			-0.515215	-2.04583			Myosin-9 OS=Homo sapiens OX=9606 GN=MYH9 PE=1 SV=4	0	1858.92	75	232	23677	200	1960	226.4	5.6	10458.8	232	33	12.7754	12.2813	12.1333	12.9939	12.6022	13.1395	12.78	11.1938	12.3193
P35580	MYH10	0.907056	0.318975	0.479762	0.598101			-0.140737	-0.778491			Myosin-10 OS=Homo sapiens OX=9606 GN=MYH10 PE=1 SV=3	0	800.407	63	141	6158	107	1976	228.9	5.54	2653.49	141	10	7.54031	7.19774	6.99805	7.45575	7.21273	7.48982	7.33838	6.302	7.112
Q14204	DYNC1H1	0.813058	2.04816	0.0089503	0.0316882	+	C33A_C93	-0.29857	-4.75313		DHC1 DNCH1 DNCL DNECL DYHC KIAA0325	Cytoplasmic dynein 1 heavy chain 1 OS=Homo sapiens OX=9606 GN=DYNC1H1 PE=1 SV=5	0	482.193	31	114	1842	114	4646	532.1	6.4	791.41	114	0	5.45726	5.38582	5.41482	5.60598	5.73981	5.80783	5.66956	5.31147	5.57787
O00159	MYO1C	1.09186	0.669763	0.213913	0.269335			0.126786	1.47628			Unconventional myosin-Ic OS=Homo sapiens OX=9606 GN=MYO1C PE=1 SV=4	0	398.208	62	68	2526	67	1063	121.6	9.41	1131.7	68	0	8.0643	7.89635	7.77755	7.74478	7.81646	7.79659	8.05186	7.13918	7.88006
O43795	MYO1B	1.07085	0.355905	0.440651	0.556281			0.0987562	0.855179			Unconventional myosin-Ib OS=Homo sapiens OX=9606 GN=MYO1B PE=1 SV=3	0	335.129	53	65	3046	64	1136	131.9	9.38	1504.51	65	1	8.2725	8.03218	7.96784	7.99709	7.8704	8.10876	8.2727	7.21969	8.06522
P78527	PRKDC	0.967202	0.300468	0.500648	0.624091			-0.0481105	-0.739507		HYRC HYRC1	DNA-dependent protein kinase catalytic subunit OS=Homo sapiens OX=9606 GN=PRKDC PE=1 SV=3	0	328.234	24	79	1384	79	4128	468.8	7.12	643.68	79	0	5.29947	5.1356	5.21891	5.28397	5.18138	5.33296	5.3165	4.88706	5.17511
Q00610	CLTC	0.802594	1.58762	0.025845	0.0563411			-0.317259	-3.45884		CLH17 CLTCL2 KIAA0034	Clathrin heavy chain 1 OS=Homo sapiens OX=9606 GN=CLTC PE=1 SV=5	0	323.881	47	65	1285	65	1675	191.5	5.69	550.19	65	0	6.22459	6.02488	5.93093	6.34434	6.34999	6.43784	5.80711	5.06948	6.01137
P53621	COPA	0.788319	1.90488	0.0124485	0.0362879	+	C33A_C93	-0.343148	-4.31989			Coatomer subunit alpha OS=Homo sapiens OX=9606 GN=COPA PE=1 SV=2	0	321.257	52	63	2091	63	1224	138.3	7.66	967.2	63	0	6.7493	6.65895	6.63455	7.03972	6.89342	7.13912	7.03178	6.3223	6.75352
Q92616	GCN1	0.699037	2.91302	0.00122173	0.0148095	+	C33A_C93	-0.516559	-8.17054	+	GCN1L1 KIAA0219	Stalled ribosome sensor GCN1 OS=Homo sapiens OX=9606 GN=GCN1 PE=1 SV=7	0	315.567	34	74	1146	74	2671	292.5	7.43	472.93	74	0	4.29768	4.40103	4.19035	4.7893	4.80292	4.84652	4.22844	3.87026	4.19876
Q9UM54	MYO6	1.0121	0.0404715	0.911021	0.960083			0.0173546	0.118988		KIAA0389	Unconventional myosin-VI OS=Homo sapiens OX=9606 GN=MYO6 PE=1 SV=4	0	275.056	45	57	1624	57	1294	149.6	8.53	785.69	57	0	6.69181	6.39876	6.33163	6.41737	6.31522	6.63754	6.68866	5.31513	6.45422
Q14980	NUMA1	0.862195	1.11167	0.0773266	0.116192			-0.213913	-2.36398		NMP22 NUMA	Nuclear mitotic apparatus protein 1 OS=Homo sapiens OX=9606 GN=NUMA1 PE=1 SV=2	0	274.45	33	63	928	63	2115	238.1	5.78	384.13	63	0	4.64234	4.46942	4.5232	4.82968	4.60959	4.83742	4.51785	3.80361	4.22152
P60709	ACTB	0.712371	1.3775	0.0419279	0.074854			-0.4893	-2.951			Actin, cytoplasmic 1 OS=Homo sapiens OX=9606 GN=ACTB PE=1 SV=1	0	255.414	70	28	3674	9	375	41.7	5.48	1826.02	28	25	10.7973	10.5809	10.5383	11.1985	10.849	11.3368	11.2774	10.0252	10.8748
P63261	ACTG1	0.712371	1.3775	0.0419279	0.0747726			-0.4893	-2.951		ACTG	Actin, cytoplasmic 2 OS=Homo sapiens OX=9606 GN=ACTG1 PE=1 SV=1	0	255.414	70	28	3674	9	375	41.8	5.48	1826.02	28	0	10.7973	10.5809	10.5383	11.1985	10.849	11.3368	11.2774	10.0252	10.8748
Q5JSZ5	PRRC2B	1.6298	2.06091	0.00869133	0.0319095	+	C33A_C93	0.704697	4.79318	+	BAT2L BAT2L1 KIAA0515	Protein PRRC2B OS=Homo sapiens OX=9606 GN=PRRC2B PE=1 SV=2	0	249.557	31	52	794	51	2229	242.8	8.34	315.2	52	1	4.27761	4.03559	4.47937	3.54997	3.44013	3.68837	4.90503	4.92128	4.48957
P49327	FASN	1.01586	0.0600613	0.870841	0.94009			0.0227044	0.173288		FAS	Fatty acid synthase OS=Homo sapiens OX=9606 GN=FASN PE=1 SV=3	0	246.239	28	51	1127	51	2511	273.3	6.44	507.64	51	0	5.44787	5.67211	5.24556	5.44336	5.35031	5.50375	5.35504	4.83529	5.38333
Q92614	MYO18A	0.780998	1.14721	0.0712504	0.109622			-0.356609	-2.43945		CD245 KIAA0216 MYSPDZ TIAF1	Unconventional myosin-XVIIIa OS=Homo sapiens OX=9606 GN=MYO18A PE=1 SV=3	0	245.951	32	55	892	55	2054	233	6.3	355.48	55	0	4.02349	4.24687	4.36439	4.42345	4.50488	4.77624	4.88944	4.89952	5.01485
Q14517	FAT1	0.714762	1.82377	0.0150048	0.0405417	+	C33A_C93	-0.484464	-4.08759	+	CDHF7 FAT	Protocadherin Fat 1 OS=Homo sapiens OX=9606 GN=FAT1 PE=1 SV=2	0	245.258	16	59	805	58	4588	506	5	293.98	59	1	3.80827	3.67587	3.94084	4.15559	4.25906	4.46372	4.4568	4.20161	4.19748
O94832	MYO1D	1.27255	1.49224	0.032193	0.0664938			0.347722	3.22286		KIAA0727	Unconventional myosin-Id OS=Homo sapiens OX=9606 GN=MYO1D PE=1 SV=2	0	244.397	49	51	1483	51	1006	116.1	9.39	703.59	51	0	6.34657	6.11916	6.06485	5.79742	5.73623	5.95375	6.33974	5.41021	6.1597
O95071	UBR5	1.06279	0.253581	0.557723	0.686161			0.0878593	0.638755		EDD EDD1 HYD KIAA0896	E3 ubiquitin-protein ligase UBR5 OS=Homo sapiens OX=9606 GN=UBR5 PE=1 SV=2	0	243.571	26	56	869	56	2799	309.2	5.85	360.06	56	0	4.60581	4.63355	4.99512	4.76846	4.58511	4.61734	2.67028	1.94002	2.51873
Q9Y5S2	CDC42BPB	0.926788	0.821465	0.150846	0.194062			-0.109688	-1.77337		KIAA1124	Serine/threonine-protein kinase MRCK beta OS=Homo sapiens OX=9606 GN=CDC42BPB PE=1 SV=2	0	228.535	32	50	1022	44	1711	194.2	6.37	446.32	50	5	4.90071	4.77671	4.72232	4.96872	4.85776	4.90233	4.76874	4.14672	4.67224
Q15149	PLEC	0.988862	0.0130072	0.970494	0.987094			-0.0161592	-0.0393541		PLEC1	Plectin OS=Homo sapiens OX=9606 GN=PLEC PE=1 SV=3	0	228.172	17	66	606	63	4684	531.5	5.96	201.88	66	0	2.19464	3.13371	2.15668	2.25607	2.25053	3.0269	3.58722	2.82774	2.55481
Q12965	MYO1E	0.828799	0.845239	0.142811	0.185463			-0.270906	-1.8204		MYO1C	Unconventional myosin-Ie OS=Homo sapiens OX=9606 GN=MYO1E PE=1 SV=2	0	223.949	44	46	1593	45	1108	127	8.92	774.48	46	0	6.79213	6.45361	6.45767	6.82273	6.67787	7.01552	6.91958	5.6138	6.65801
P07900	HSP90AA1	0.940709	0.248766	0.563942	0.692412			-0.088179	-0.628226		HSP90A HSPC1 HSPCA	Heat shock protein HSP 90-alpha OS=Homo sapiens OX=9606 GN=HSP90AA1 PE=1 SV=5	0	223.466	54	45	1588	30	732	84.6	5.02	714.49	45	13	6.27483	6.61877	6.37377	6.50222	6.34841	6.68128	6.61961	6.22759	6.54252
Q13045	FLII	0.904822	0.372635	0.423999	0.533679			-0.144295	-0.889495		FLIL	Protein flightless-1 homolog OS=Homo sapiens OX=9606 GN=FLII PE=1 SV=2	0	220.229	46	45	1072	45	1269	144.7	6.05	455.05	45	0	5.33308	5.24052	4.82986	5.20025	5.26724	5.36885	5.0004	3.87624	4.82693
Q63HN8	RNF213	0.733272	1.37378	0.0422885	0.0747792			-0.44758	-2.94239		ALO17 C17orf27 KIAA1554 KIAA1618 MYSTR	E3 ubiquitin-protein ligase RNF213 OS=Homo sapiens OX=9606 GN=RNF213 PE=1 SV=3	0	214.743	14	55	524	55	5207	591	6.48	147.23	55	0	1.96319	1.49226	1.81679	2.31214	2.09929	2.20355	1.99055	1.03869	2.03376
Q9NZM1	MYOF	0.807973	1.87968	0.0131924	0.0371963	+	C33A_C93	-0.307621	-4.24674		FER1L3 KIAA1207	Myoferlin OS=Homo sapiens OX=9606 GN=MYOF PE=1 SV=1	0	212.291	29	50	892	50	2061	234.6	6.18	432.45	50	0	4.32616	4.23189	4.11572	4.45801	4.5469	4.59171	4.28363	3.78857	4.14739
O15027	SEC16A	1.47383	1.97007	0.0107135	0.0353714	+	C33A_C93	0.559575	4.51324	+	KIAA0310 SEC16 SEC16L	Protein transport protein Sec16A OS=Homo sapiens OX=9606 GN=SEC16A PE=1 SV=4	0	211.987	28	47	716	47	2357	251.7	5.8	300.29	47	0	4.38889	4.20423	4.54856	3.88046	3.6739	3.9086	5.00166	5.27151	4.78404
Q9Y4I1	MYO5A	1.00272	0.011911	0.972947	0.988319			0.00391563	0.0360809		MYH12	Unconventional myosin-Va OS=Homo sapiens OX=9606 GN=MYO5A PE=1 SV=2	0	203.27	28	47	980	43	1855	215.3	8.48	441.62	47	3	4.85184	4.64069	4.5344	4.60849	4.62444	4.78225	4.75206	3.77453	4.59619
Q07157	TJP1	2.21876	2.38465	0.00412429	0.02265	+	C33A_C93	1.14976	5.90179	+	ZO1	Tight junction protein ZO-1 OS=Homo sapiens OX=9606 GN=TJP1 PE=1 SV=3	0	201.78	32	42	778	42	1748	195.3	6.7	346.75	42	0	4.66537	4.47903	4.93719	3.51025	3.31626	3.80581	5.01793	5.20694	4.80584
O00571	DDX3X	1.07103	0.388374	0.408909	0.516545			0.0989952	0.921565		DBX DDX3	ATP-dependent RNA helicase DDX3X OS=Homo sapiens OX=9606 GN=DDX3X PE=1 SV=3	0	201.724	53	35	1850	34	662	73.2	7.18	909.05	35	1	7.34684	7.15409	7.41703	7.16383	7.1074	7.34975	7.79116	7.74976	7.60757
P07437	TUBB	0.898114	0.642194	0.227932	0.283808			-0.15503	-1.42259		TUBB5	Tubulin beta chain OS=Homo sapiens OX=9606 GN=TUBB PE=1 SV=2	0	201.513	64	24	2936	5	444	49.6	4.89	1272.31	24	24	9.0475	8.81026	8.94136	9.13749	8.9231	9.20362	9.54756	9.45787	9.42676
P35908	KRT2	4.3017	1.89519	0.0127296	0.0361651	+	C33A_C93	2.10491	4.29164	+	KRT2A KRT2E	Keratin, type II cytoskeletal 2 epidermal OS=Homo sapiens OX=9606 GN=KRT2 PE=1 SV=2	0	199.255	67	40	686	31	639	65.4	8	307.77	40	7	5.24843	4.29371	5.83034	2.62532	3.1579	3.27453	4.93435	5.96612	5.2113
P04264	KRT1	9.92044	2.19654	0.00635999	0.027936	+	C33A_C93	3.3104	5.23545	+	KRTA	Keratin, type II cytoskeletal 1 OS=Homo sapiens OX=9606 GN=KRT1 PE=1 SV=6	0	187.832	44	35	762	30	644	66	8.12	355.55	35	2	5.85026	5.44609	6.51948	1.54871	2.99033	3.34558	5.90309	6.81302	5.97681
P68371	TUBB4B	1.10688	1.18928	0.0646729	0.102989			0.146496	2.52988		TUBB2C	Tubulin beta-4B chain OS=Homo sapiens OX=9606 GN=TUBB4B PE=1 SV=1	0	187.624	58	22	2969	1	445	49.8	4.89	1357.25	22	2	7.24815	7.22018	7.25968	7.06891	7.01447	7.20514	7.76676	7.68869	7.59226
O75643	SNRNP200	0.927204	1.04636	0.0898759	0.130437			-0.109042	-2.22734		ASCC3L1 BRR2 HELIC2 KIAA0788	U5 small nuclear ribonucleoprotein 200 kDa helicase OS=Homo sapiens OX=9606 GN=SNRNP200 PE=1 SV=2	0	186.513	26	45	721	45	2136	244.4	6.06	321.02	45	0	3.86787	3.77808	3.87139	3.96908	4.00146	3.87394	3.69074	3.40164	3.71787
Q14152	EIF3A	0.793364	1.20264	0.0627128	0.101205			-0.333945	-2.55887		EIF3S10 KIAA0139	Eukaryotic translation initiation factor 3 subunit A OS=Homo sapiens OX=9606 GN=EIF3A PE=1 SV=1	0	185.772	30	47	900	47	1382	166.5	6.79	418.14	47	0	4.95936	4.73135	5.15101	5.37378	5.25781	5.21196	4.48602	4.52686	4.21542
P67936	TPM4	0.70384	1.42228	0.0378199	0.0703705			-0.506681	-3.05562			Tropomyosin alpha-4 chain OS=Homo sapiens OX=9606 GN=TPM4 PE=1 SV=3	0	180.549	83	32	1691	18	248	28.5	4.69	830.7	32	13	7.65404	7.30354	7.2223	7.92032	7.71794	8.06167	7.64321	6.27107	7.37179
P68133	ACTA1	0.307535	2.24671	0.00566616	0.0265556	+	C33A_C93	-1.70118	-5.40689	+	ACTA	Actin, alpha skeletal muscle OS=Homo sapiens OX=9606 GN=ACTA1 PE=1 SV=1	0	180.494	52	23	2477	7	377	42	5.39	1262.62	23	0	-3.2898	-2.50989	-3.29516	-1.65927	-1.2743	-1.05775	-3.40191	-4.7381	-2.94456
O75165	DNAJC13	1.01826	0.0892382	0.814258	0.905922			0.0261008	0.250893		KIAA0678 RME8	DnaJ homolog subfamily C member 13 OS=Homo sapiens OX=9606 GN=DNAJC13 PE=1 SV=5	0	179.404	23	43	529	43	2243	254.3	6.74	194.67	43	0	3.43902	3.24189	3.30426	3.38169	3.12997	3.39521	2.93528	2.78594	3.03063
P68032	ACTC1	0.307535	2.24671	0.00566616	0.026482	+	C33A_C93	-1.70118	-5.40689	+	ACTC	Actin, alpha cardiac muscle 1 OS=Homo sapiens OX=9606 GN=ACTC1 PE=1 SV=1	0	178.337	46	22	2474	6	377	42	5.39	1261.97	22	0	-3.2898	-2.50989	-3.29516	-1.65927	-1.2743	-1.05775	-3.40191	-3.65417	-2.94456
Q13885	TUBB2A	0.575499	2.12725	0.00746013	0.0294915	+	C33A_C93	-0.797116	-5.00573	+	TUBB2	Tubulin beta-2A chain OS=Homo sapiens OX=9606 GN=TUBB2A PE=1 SV=1	0	176.749	56	21	1909	1	445	49.9	4.89	827.32	21	2	1.10026	1.54136	1.57408	2.18648	2.28682	2.13375	1.79283	2.27194	1.88207
Q9BVA1	TUBB2B	1.16572	0.7939	0.160731	0.20537			0.221217	1.71904			Tubulin beta-2B chain OS=Homo sapiens OX=9606 GN=TUBB2B PE=1 SV=1	0	176.697	56	21	1958	1	445	49.9	4.89	848.23	21	0	2.03703	1.71228	2.08202	1.65638	1.68018	1.83112	2.63071	2.536	2.34746
Q9P2E9	RRBP1	1.26907	1.32358	0.0474697	0.0815868			0.343772	2.82741		KIAA1398	Ribosome-binding protein 1 OS=Homo sapiens OX=9606 GN=RRBP1 PE=1 SV=5	0	173.643	32	36	624	35	1410	152.4	8.6	283.47	36	1	4.82886	4.71216	4.74662	4.57773	4.19163	4.48695	4.95042	4.36838	4.80228
P08238	HSP90AB1	0.85933	1.29329	0.0508993	0.0840159			-0.218716	-2.75905		HSP90B HSPC2 HSPCB	Heat shock protein HSP 90-beta OS=Homo sapiens OX=9606 GN=HSP90AB1 PE=1 SV=4	0	173.64	39	35	1482	10	724	83.2	5.03	699.99	35	9	5.37811	5.49328	5.35691	5.5413	5.58321	5.75994	5.61281	5.33263	5.44304
Q08211	DHX9	1.19404	1.80806	0.0155577	0.0422222	+	C33A_C93	0.255845	4.0436		DDX9 LKP NDH2	ATP-dependent RNA helicase A OS=Homo sapiens OX=9606 GN=DHX9 PE=1 SV=4	0	171.15	33	36	1129	36	1270	140.9	6.84	538.51	36	0	5.79953	5.73297	5.84331	5.61775	5.43264	5.55788	5.86846	5.70122	5.71512
Q5T4S7	UBR4	0.907684	0.427624	0.373573	0.470235			-0.139737	-1.00076		KIAA0462 KIAA1307 RBAF600 ZUBR1	E3 ubiquitin-protein ligase UBR4 OS=Homo sapiens OX=9606 GN=UBR4 PE=1 SV=1	0	170.502	11	43	492	43	5183	573.5	6.04	166.76	43	0	2.43546	2.9051	2.65106	2.73878	2.82738	2.84467	2.58699	2.22832	2.72231
P27708	CAD	0.798723	2.46605	0.00341939	0.0231972	+	C33A_C93	-0.324232	-6.21099	+		Multifunctional protein CAD OS=Homo sapiens OX=9606 GN=CAD PE=1 SV=3	0	169.403	23	37	514	37	2225	242.8	6.46	214.53	37	0	3.04882	3.06239	3.1125	3.45827	3.30275	3.43538	3.28595	3.25076	3.19828
P11142	HSPA8	0.928981	0.436839	0.365731	0.458285			-0.106279	-1.01921		HSC70 HSP73 HSPA10	Heat shock cognate 71 kDa protein OS=Homo sapiens OX=9606 GN=HSPA8 PE=1 SV=1	0	169.273	54	32	1243	27	646	70.9	5.52	514.22	32	3	6.79308	6.73187	6.64607	6.7959	6.68481	7.00914	7.04827	6.45682	6.77543
P49750	YLPM1	0.829496	0.767732	0.170713	0.218632			-0.269693	-1.66764		C14orf170 ZAP3	YLP motif-containing protein 1 OS=Homo sapiens OX=9606 GN=YLPM1 PE=1 SV=4	0	169.164	19	37	745	37	2146	241.5	6.55	369.35	37	0	3.62794	3.47034	3.89337	3.82734	3.83086	4.14254	4.54113	4.82272	4.37067
Q13509	TUBB3	0.592262	3.94458	0.000113611	0.008	+	C33A_C93	-0.755693	-15.0492	+	TUBB4	Tubulin beta-3 chain OS=Homo sapiens OX=9606 GN=TUBB3 PE=1 SV=2	0	168.869	59	22	1912	7	450	50.4	4.93	848.27	22	1	5.07152	5.02374	4.91962	5.80298	5.72576	5.75322	5.13918	5.21549	5.11332
P46940	IQGAP1	1.56379	2.37278	0.00423853	0.0224396	+	C33A_C93	0.64505	5.85781	+	KIAA0051	Ras GTPase-activating-like protein IQGAP1 OS=Homo sapiens OX=9606 GN=IQGAP1 PE=1 SV=1	0	168.571	32	39	587	37	1657	189.1	6.48	271.34	39	2	4.06817	4.06916	4.27153	3.51712	3.62715	3.32945	4.55132	4.24145	4.22328
Q6P2Q9	PRPF8	1.06554	0.291904	0.510618	0.63592			0.0915903	0.721328		PRPC8	Pre-mRNA-processing-splicing factor 8 OS=Homo sapiens OX=9606 GN=PRPF8 PE=1 SV=2	0	168.316	22	48	587	48	2335	273.4	8.84	254.16	48	0	3.89118	3.76105	4.11737	3.71843	3.80913	3.96727	3.85326	4.16409	4.04641
Q8N3C0	ASCC3	1.1925	1.32702	0.0470959	0.0818017			0.253986	2.8352		HELIC1 RQT2	Activating signal cointegrator 1 complex subunit 3 OS=Homo sapiens OX=9606 GN=ASCC3 PE=1 SV=3	0	168.135	24	38	539	38	2202	251.3	7.09	199.89	38	0	2.72803	2.89962	3.02742	2.62624	2.59485	2.67203	2.46904	2.06907	2.7448
P62736	ACTA2	0.307535	2.24671	0.00566616	0.0264088	+	C33A_C93	-1.70118	-5.40689	+	ACTSA ACTVS	Actin, aortic smooth muscle OS=Homo sapiens OX=9606 GN=ACTA2 PE=1 SV=1	0	167.272	43	21	2218	6	377	42	5.39	1170.36	21	0	-3.2898	-2.50989	-3.29516	-1.65927	-1.2743	-1.05775	-3.40191	-3.61922	-2.94456
P36578	RPL4	1.21606	1.01509	0.0965847	0.138377			0.282218	2.16281		RPL1	Large ribosomal subunit protein uL4 OS=Homo sapiens OX=9606 GN=RPL4 PE=1 SV=5	0	166.118	50	27	1567	27	427	47.7	11.06	670.99	27	0	7.92263	7.63745	7.62934	7.61471	7.31679	7.41127	7.87187	6.97221	7.52043
Q14683	SMC1A	1.16948	0.854528	0.139789	0.182156			0.225864	1.83883		DXS423E KIAA0178 SB1.8 SMC1 SMC1L1	Structural maintenance of chromosomes protein 1A OS=Homo sapiens OX=9606 GN=SMC1A PE=1 SV=2	0	164.769	31	40	711	40	1233	143.1	7.64	324.58	40	0	4.19081	4.11041	4.19851	3.9094	3.75108	4.16167	4.33194	3.91897	4.11374
P07951	TPM2	0.618941	1.60143	0.025036	0.055514			-0.692127	-3.49382	+	TMSB	Tropomyosin beta chain OS=Homo sapiens OX=9606 GN=TPM2 PE=1 SV=1	0	164.495	65	28	1355	12	284	32.8	4.7	664.16	28	4	4.40379	4.00404	3.81221	4.94061	4.61764	4.73817	4.25308	2.80892	3.89943
Q9NTJ3	SMC4	1.41741	4.0578	8.75396e-05	0.006875	+	C33A_C93	0.503256	16.0771	+	CAPC SMC4L1	Structural maintenance of chromosomes protein 4 OS=Homo sapiens OX=9606 GN=SMC4 PE=1 SV=2	0	164.056	26	37	517	37	1288	147.1	6.79	241.77	37	0	4.16818	4.07797	4.168	3.65039	3.61994	3.63406	4.34253	4.06298	4.24245
P04350	TUBB4A	0.721972	1.55055	0.028148	0.0637477			-0.469986	-3.36599		TUBB4 TUBB5	Tubulin beta-4A chain OS=Homo sapiens OX=9606 GN=TUBB4A PE=1 SV=2	0	160.783	53	20	2373	1	444	49.6	4.88	1008.44	20	2	2.00236	2.05765	1.74804	2.43771	2.2156	2.5647	2.04449	1.47694	1.61969
P06396	GSN	0.480667	2.15396	0.00701525	0.02791	+	C33A_C93	-1.05689	-5.09331	+		Gelsolin OS=Homo sapiens OX=9606 GN=GSN PE=1 SV=1	0	160.51	39	25	902	25	782	85.6	6.28	406.62	25	0	6.11959	5.64496	5.53814	6.98171	6.62403	6.86762	5.93155	4.76136	5.61405
Q9UPQ0	LIMCH1	1.46689	1.88088	0.0131558	0.0371176	+	C33A_C93	0.552757	4.25021	+	KIAA1102	LIM and calponin homology domains-containing protein 1 OS=Homo sapiens OX=9606 GN=LIMCH1 PE=1 SV=4	0	159.048	37	36	684	36	1083	121.8	6.47	301.62	36	0	3.9588	4.30412	4.03284	3.44389	3.49733	3.69627	4.43331	4.42317	4.25134
O43852	CALU	0.873496	1.09213	0.0808862	0.121331			-0.195127	-2.32282			Calumenin OS=Homo sapiens OX=9606 GN=CALU PE=1 SV=2	0	158.756	71	20	1514	20	315	37.1	4.64	693.2	20	0	6.88097	6.92048	6.73393	7.15725	7.01698	6.94653	7.64683	7.88344	7.53467
Q7L2E3	DHX30	1.24687	1.62112	0.0239264	0.0529659			0.318311	3.54404		DDX30 KIAA0890	ATP-dependent RNA helicase DHX30 OS=Homo sapiens OX=9606 GN=DHX30 PE=1 SV=1	0	158.049	32	31	749	31	1194	133.9	8.78	370.67	31	0	4.74663	4.68944	4.69884	4.40282	4.23629	4.54087	4.86367	4.67882	4.62021
Q13813	SPTAN1	1.9219	0.874237	0.133587	0.176271			0.942535	1.87802		NEAS SPTA2	Spectrin alpha chain, non-erythrocytic 1 OS=Homo sapiens OX=9606 GN=SPTAN1 PE=1 SV=3	0	155.728	20	41	289	41	2472	284.4	5.35	94.78	41	0	1.30881	2.87817	1.96447	0.687083	1.27932	1.35744	1.67094	1.90443	2.12419
P11717	IGF2R	0.6344	3.36287	0.000433636	0.0171183	+	C33A_C93	-0.656534	-10.6912	+	MPRI	Cation-independent mannose-6-phosphate receptor OS=Homo sapiens OX=9606 GN=IGF2R PE=1 SV=3	0	153.446	20	36	426	36	2491	274.2	5.94	162.65	36	0	2.48728	2.54518	2.36725	3.1825	3.07267	3.11414	2.47103	1.68242	2.14775
P13645	KRT10	8.71756	1.80003	0.0158478	0.0422576	+	C33A_C93	3.12392	4.02127	+	KPP	Keratin, type I cytoskeletal 10 OS=Homo sapiens OX=9606 GN=KRT10 PE=1 SV=6	0	152.778	41	28	839	24	584	58.8	5.21	419.85	28	4	6.25229	5.60012	7.05769	1.8777	3.74962	3.91101	6.05299	7.13582	6.52585
O15523	DDX3Y	1.06295	0.309686	0.490133	0.609914			0.0880706	0.758975		DBY	ATP-dependent RNA helicase DDX3Y OS=Homo sapiens OX=9606 GN=DDX3Y PE=1 SV=2	0	152.778	39	25	1226	24	660	73.1	7.55	622.61	25	0	6.84234	6.6681	6.95462	6.71497	6.60404	6.88183	7.39223	7.25047	7.13183
P23458	JAK1	0.805638	1.17483	0.0668601	0.104777			-0.311797	-2.49869		JAK1A JAK1B	Tyrosine-protein kinase JAK1 OS=Homo sapiens OX=9606 GN=JAK1 PE=1 SV=2	0	152.657	35	35	636	33	1154	133.2	7.55	270.17	35	2	4.10938	3.80459	3.72203	4.16247	4.13738	4.27155	4.07363	2.98313	3.78302
Q00839	HNRNPU	0.792643	1.14033	0.0723878	0.109964			-0.335257	-2.42478		C1orf199 HNRPU SAFA U21.1	Heterogeneous nuclear ribonucleoprotein U OS=Homo sapiens OX=9606 GN=HNRNPU PE=1 SV=6	0	151.419	37	28	703	28	825	90.5	6	343.05	28	0	5.85885	5.46211	5.56384	6.10329	5.87829	5.90899	5.95127	5.79594	5.7637
O75369	FLNB	0.83684	0.555198	0.278485	0.345793			-0.256976	-1.25291		FLN1L FLN3 TABP TAP	Filamin-B OS=Homo sapiens OX=9606 GN=FLNB PE=1 SV=2	0	150.898	20	39	502	37	2602	278	5.73	170.42	39	1	2.00594	2.6433	2.10312	2.4115	2.5193	2.59248	1.94857	2.06092	2.2345
Q9UQE7	SMC3	1.18347	1.27412	0.0531965	0.0872646			0.243019	2.71618		BAM BMH CSPG6 SMC3L1	Structural maintenance of chromosomes protein 3 OS=Homo sapiens OX=9606 GN=SMC3 PE=1 SV=2	0	148.951	26	33	635	33	1217	141.5	7.18	304.6	33	0	3.68141	3.53401	3.77182	3.52067	3.32501	3.41251	3.74258	3.43488	3.71466
Q9NR30	DDX21	1.45372	2.07138	0.00848438	0.0316538	+	C33A_C93	0.539754	4.82625	+		Nucleolar RNA helicase 2 OS=Homo sapiens OX=9606 GN=DDX21 PE=1 SV=5	0	148.56	44	33	654	31	783	87.3	9.28	283.89	33	2	4.39083	4.37326	4.22605	3.95072	3.60992	3.81025	4.33311	3.84557	4.29244
Q92841	DDX17	1.05981	0.477671	0.332912	0.416632			0.0838097	1.10044			Probable ATP-dependent RNA helicase DDX17 OS=Homo sapiens OX=9606 GN=DDX17 PE=1 SV=2	0	147.423	40	33	1512	23	729	80.2	8.27	727.41	33	9	6.75044	6.755	6.83114	6.69986	6.56884	6.81645	6.77246	6.35614	6.58162
P17844	DDX5	1.27127	2.54854	0.00282788	0.0225669	+	C33A_C93	0.346273	6.53817	+	G17P1 HELR HLR1	Probable ATP-dependent RNA helicase DDX5 OS=Homo sapiens OX=9606 GN=DDX5 PE=1 SV=1	0	146.903	50	30	1572	20	614	69.1	8.92	807.19	30	0	5.64009	5.61127	5.66956	5.30742	5.20114	5.37355	5.7187	5.44525	5.51604
O95347	SMC2	1.78273	2.80665	0.0015608	0.0184216	+	C33A_C93	0.834088	7.66041	+	CAPE SMC2L1	Structural maintenance of chromosomes protein 2 OS=Homo sapiens OX=9606 GN=SMC2 PE=1 SV=2	0	142.942	29	32	542	32	1197	135.6	8.43	218.48	32	0	3.74162	3.80477	3.91755	2.88317	2.8996	3.17891	3.66339	3.23549	3.55709
Q7Z406	MYH14	0.202259	2.51329	0.00306697	0.0226617	+	C33A_C93	-2.30572	-6.3966	+	KIAA2034	Myosin-14 OS=Homo sapiens OX=9606 GN=MYH14 PE=1 SV=2	0	141.292	17	30	1593	17	1995	227.7	5.6	775.44	30	0	-1.99811	-1.22121	-0.801701	0.92575	1.12705	0.843345	0.149653	-0.35002	-1.29765
P13639	EEF2	0.93404	0.376898	0.419857	0.528152			-0.0984441	-0.898201		EF2	Elongation factor 2 OS=Homo sapiens OX=9606 GN=EEF2 PE=1 SV=4	0	141.105	44	29	652	29	858	95.3	6.83	303.24	29	0	4.76117	5.0314	4.68062	4.89814	4.89254	4.97785	4.72222	4.14724	4.69344
Q6WCQ1	MPRIP	3.5689	3.01202	0.000972697	0.0143129	+	C33A_C93	1.83548	8.67276	+	KIAA0864 MRIP RHOIP3	Myosin phosphatase Rho-interacting protein OS=Homo sapiens OX=9606 GN=MPRIP PE=1 SV=3	0	140.806	40	34	369	34	1025	116.5	6.21	155.16	34	0	2.52468	3.0064	2.35115	0.660069	0.935833	0.779883	2.67662	2.64701	2.75305
P52701	MSH6	1.38382	1.31798	0.0480865	0.0821896			0.468652	2.8147		GTBP	DNA mismatch repair protein Msh6 OS=Homo sapiens OX=9606 GN=MSH6 PE=1 SV=2	0	140.697	24	30	705	30	1360	152.7	6.9	339.38	30	0	4.45103	4.25976	4.69981	3.91518	3.87477	4.2147	4.82423	4.91296	4.07014
P68363	TUBA1B	0.906118	0.628798	0.235073	0.292237			-0.14223	-1.39649			Tubulin alpha-1B chain OS=Homo sapiens OX=9606 GN=TUBA1B PE=1 SV=1	0	140.478	57	21	1438	1	451	50.1	5.06	735.95	21	22	8.00558	7.86751	7.95546	8.0475	7.94521	8.26254	8.5762	8.17523	8.31829
Q92900	UPF1	2.0982	2.93931	0.00114997	0.01555	+	C33A_C93	1.06915	8.30126	+	KIAA0221 RENT1	Regulator of nonsense transcripts 1 OS=Homo sapiens OX=9606 GN=UPF1 PE=1 SV=2	0	140.143	30	28	498	28	1129	124.3	6.61	225.44	28	0	3.61789	3.66753	3.89451	2.46425	2.75147	2.75675	3.80925	3.77739	3.78392
Q9C0C2	TNKS1BP1	1.06817	0.536195	0.290941	0.360216			0.0951366	1.2157		KIAA1741 TAB182	182 kDa tankyrase-1-binding protein OS=Homo sapiens OX=9606 GN=TNKS1BP1 PE=1 SV=4	0	139.896	22	29	392	29	1729	181.7	4.86	167.45	29	0	2.86721	2.97073	2.91541	2.68379	2.92713	2.85701	3.50809	3.70813	3.45252
Q01082	SPTBN1	1.18618	0.30593	0.49439	0.614567			0.246319	0.751055		SPTB2	Spectrin beta chain, non-erythrocytic 1 OS=Homo sapiens OX=9606 GN=SPTBN1 PE=1 SV=2	0	139.84	18	35	345	35	2364	274.4	5.57	120.5	35	0	2.43538	3.48769	2.86946	2.47266	2.69374	2.88717	3.04261	3.18725	2.87135
Q9ULV0	MYO5B	1.05435	0.125427	0.749157	0.852825			0.0763481	0.342584		KIAA1119	Unconventional myosin-Vb OS=Homo sapiens OX=9606 GN=MYO5B PE=1 SV=3	0	137.462	22	36	607	32	1848	213.5	7.2	271.55	36	0	2.79095	2.77833	2.13157	2.58304	2.46394	2.42483	2.54427	1.64257	2.22912
O60716	CTNND1	0.983306	0.0425018	0.906772	0.956992			-0.0242877	-0.124706		KIAA0384	Catenin delta-1 OS=Homo sapiens OX=9606 GN=CTNND1 PE=1 SV=1	0	136.956	32	26	1045	26	968	108.1	6.23	431.82	26	0	4.50069	4.54886	5.09644	4.75775	4.79407	4.66703	5.55864	5.65965	5.47426
O60506	SYNCRIP	0.834672	0.784237	0.164347	0.209317			-0.260719	-1.70004		HNRPQ NSAP1	Heterogeneous nuclear ribonucleoprotein Q OS=Homo sapiens OX=9606 GN=SYNCRIP PE=1 SV=2	0	136.221	43	27	809	18	623	69.6	8.59	355.71	27	8	4.88652	4.64502	4.99333	5.25293	5.17439	4.87971	5.32264	5.56006	5.21856
Q5VT25	CDC42BPA	0.867872	1.94446	0.0113642	0.0361434	+	C33A_C93	-0.204446	-4.43655		KIAA0451	Serine/threonine-protein kinase MRCK alpha OS=Homo sapiens OX=9606 GN=CDC42BPA PE=1 SV=1	0	136.171	23	33	378	28	1732	197.2	6.58	162.98	33	0	2.08791	2.06981	2.0494	2.33825	2.18768	2.29452	2.11145	1.55143	1.72156
Q9BQE3	TUBA1C	1.07096	0.184604	0.653727	0.778142			0.0989088	0.483945		TUBA6	Tubulin alpha-1C chain OS=Homo sapiens OX=9606 GN=TUBA1C PE=1 SV=1	0	135.884	51	20	1414	2	449	49.9	5.1	727.61	20	0	1.28042	1.46257	1.45239	0.976569	1.65235	1.26972	1.67821	1.99477	1.56734
O14578	CIT	5.3364	4.188	6.48639e-05	0.00956522	+	C33A_C93	2.41587	17.3439	+	CRIK KIAA0949 STK21	Citron Rho-interacting kinase OS=Homo sapiens OX=9606 GN=CIT PE=1 SV=2	0	135.628	20	33	365	33	2027	231.3	6.57	142.96	33	0	3.74729	3.54495	3.94177	1.17562	1.44056	1.37024	1.65196	1.74508	1.60424
P07814	EPRS1	1.17608	1.46662	0.0341492	0.0690439			0.233987	3.16106		EPRS GLNS PARS QARS QPRS	Bifunctional glutamate/proline--tRNA ligase OS=Homo sapiens OX=9606 GN=EPRS1 PE=1 SV=5	0	134.086	25	29	502	29	1512	170.5	7.33	228.96	29	0	3.84454	3.745	3.85242	3.61556	3.67133	3.45311	4.39684	4.20573	4.10221
Q71U36	TUBA1A	0.908458	0.596052	0.253483	0.31461			-0.138508	-1.33268		TUBA3	Tubulin alpha-1A chain OS=Homo sapiens OX=9606 GN=TUBA1A PE=1 SV=1	0	131.065	54	20	1375	1	451	50.1	5.06	702.62	20	0	7.98627	7.85056	7.93978	8.02402	7.92142	8.24668	8.5651	8.17003	8.30547
O75533	SF3B1	0.909557	0.909309	0.123223	0.163194			-0.136765	-1.94812		SAP155	Splicing factor 3B subunit 1 OS=Homo sapiens OX=9606 GN=SF3B1 PE=1 SV=3	0	129.96	30	28	384	28	1304	145.7	7.09	162.79	28	0	3.26787	3.27857	3.39592	3.53966	3.46837	3.34463	2.85284	2.92893	2.91992
P21333	FLNA	0.961548	0.183846	0.654869	0.778503			-0.0565694	-0.48219		FLN FLN1	Filamin-A OS=Homo sapiens OX=9606 GN=FLNA PE=1 SV=4	0	129.716	15	32	383	30	2647	280.6	6.06	160.42	32	0	1.73531	2.06986	1.82369	1.87287	1.87045	2.05523	1.70656	1.41112	1.98675
P05023	ATP1A1	0.759807	1.90706	0.0123863	0.0366348	+	C33A_C93	-0.396296	-4.32624	+		Sodium/potassium-transporting ATPase subunit alpha-1 OS=Homo sapiens OX=9606 GN=ATP1A1 PE=1 SV=1	0	129.345	33	31	876	20	1023	112.8	5.49	414.62	31	7	4.30925	4.44392	4.35315	4.90598	4.62002	4.7692	4.45236	4.00459	4.28471
Q14697	GANAB	0.797499	0.705396	0.197062	0.248093			-0.326445	-1.54574		G2AN KIAA0088	Neutral alpha-glucosidase AB OS=Homo sapiens OX=9606 GN=GANAB PE=1 SV=3	0	128.067	34	24	496	24	944	106.8	6.14	208.81	24	0	3.71559	4.10729	3.55502	3.98857	3.98351	4.38515	3.7757	3.637	3.70904
P29317	EPHA2	0.811578	1.1248	0.0750244	0.113946			-0.301199	-2.39176		ECK	Ephrin type-A receptor 2 OS=Homo sapiens OX=9606 GN=EPHA2 PE=1 SV=2	0	127.89	33	26	893	25	976	108.2	6.23	419.2	26	1	5.46189	5.2632	5.15529	5.57485	5.4526	5.75653	5.58	4.72166	5.20552
Q01813	PFKP	0.729654	2.00515	0.0098822	0.0342393	+	C33A_C93	-0.454715	-4.61985	+	PFKF	ATP-dependent 6-phosphofructokinase, platelet type OS=Homo sapiens OX=9606 GN=PFKP PE=1 SV=2	0	127.237	41	28	661	27	784	85.5	7.55	295.41	28	1	4.46719	4.41948	4.22497	4.82714	4.71208	4.93655	4.6902	4.0743	4.35545
Q13501	SQSTM1	1.12442	0.552456	0.280249	0.347312			0.169177	1.24754		ORCA OSIL	Sequestosome-1 OS=Homo sapiens OX=9606 GN=SQSTM1 PE=1 SV=1	0	126.84	52	16	1174	16	440	47.7	5.22	415.13	16	0	7.78122	7.76137	7.48046	7.54799	7.32408	7.64345	7.83035	7.10565	7.66042
Q92499	DDX1	0.620549	3.10447	0.000786192	0.0157143	+	C33A_C93	-0.688384	-9.16712	+		ATP-dependent RNA helicase DDX1 OS=Homo sapiens OX=9606 GN=DDX1 PE=1 SV=2	0	126.781	41	24	582	24	740	82.4	7.23	230.34	24	0	3.95189	3.90632	4.10288	4.6705	4.75732	4.59842	4.2001	4.17557	3.95129
P02786	TFRC	0.666442	2.00821	0.00981265	0.0344602	+	C33A_C93	-0.585449	-4.62926	+		Transferrin receptor protein 1 OS=Homo sapiens OX=9606 GN=TFRC PE=1 SV=2	0	124.833	35	26	823	26	760	84.8	6.61	428.42	26	0	6.04886	5.90057	5.77085	6.48932	6.32446	6.66284	6.23975	5.46054	5.96674
O95782	AP2A1	0.982462	0.511645	0.307861	0.382486			-0.0255268	-1.16749		ADTAA CLAPA1	AP-2 complex subunit alpha-1 OS=Homo sapiens OX=9606 GN=AP2A1 PE=1 SV=3	0	123.679	36	28	632	22	977	107.5	7.03	307.84	28	5	4.40924	4.47025	4.47291	4.47529	4.48852	4.46517	4.28537	3.30463	4.29523
P14625	HSP90B1	0.667147	2.2756	0.00530151	0.0257241	+	C33A_C93	-0.583923	-5.50764	+	GRP94 TRA1	Endoplasmin OS=Homo sapiens OX=9606 GN=HSP90B1 PE=1 SV=1	0	122.467	35	26	660	24	803	92.4	4.84	323.96	26	0	3.59974	3.94378	3.67505	4.35119	4.28869	4.33045	3.68219	3.4792	3.68154
O95793	STAU1	1.084	0.819271	0.15161	0.194619			0.116361	1.76903		STAU	Double-stranded RNA-binding protein Staufen homolog 1 OS=Homo sapiens OX=9606 GN=STAU1 PE=1 SV=2	0	122.306	37	21	562	19	577	63.1	9.44	261.74	21	2	5.2394	5.13362	5.14794	5.00077	5.00017	5.17094	5.26245	4.76115	5.05704
Q9GZR7	DDX24	0.850116	1.49606	0.0319107	0.0663509			-0.234269	-3.23214			ATP-dependent RNA helicase DDX24 OS=Homo sapiens OX=9606 GN=DDX24 PE=1 SV=1	0	122.299	37	24	439	24	859	96.3	9.06	213.4	24	0	3.25322	3.08337	3.15859	3.45621	3.29285	3.44892	3.1858	2.92137	3.19984
P63010	AP2B1	0.765217	1.91205	0.0122448	0.0365374	+	C33A_C93	-0.386059	-4.34084		ADTB2 CLAPB1	AP-2 complex subunit beta OS=Homo sapiens OX=9606 GN=AP2B1 PE=1 SV=1	0	121.97	35	27	370	16	937	104.5	5.38	160.95	27	9	3.5438	3.43339	3.37364	3.73616	3.97997	3.79288	3.08714	1.85685	3.26742
P23588	EIF4B	1.24575	0.803814	0.157104	0.201088			0.317019	1.73855			Eukaryotic translation initiation factor 4B OS=Homo sapiens OX=9606 GN=EIF4B PE=1 SV=2	0	119.737	41	24	475	24	611	69.1	5.73	184.98	24	0	3.65138	3.60971	4.07255	3.61811	3.50733	3.25714	3.63815	3.76831	3.38792
Q9BUF5	TUBB6	0.352521	1.4963	0.0318934	0.0664341			-1.50422	-3.23271	+		Tubulin beta-6 chain OS=Homo sapiens OX=9606 GN=TUBB6 PE=1 SV=1	0	119.622	48	19	1170	6	446	49.8	4.88	570.25	19	0	4.3058	2.94351	2.88793	4.94734	4.89112	4.81143	2.93675	2.43476	3.20614
Q99996	AKAP9	1.13171	0.238505	0.577424	0.705945			0.178509	0.605663		AKAP350 AKAP450 KIAA0803	A-kinase anchor protein 9 OS=Homo sapiens OX=9606 GN=AKAP9 PE=1 SV=4	0	119.504	11	36	209	36	3907	452.7	4.98	58.2	36	0	-0.255756	0.0204485	0.48128	-0.495668	0.152703	0.0534112	1.14617	1.5836	0.873938
Q9Y5X1	SNX9	1.04059	0.172173	0.672708	0.793691			0.0574045	0.455003		SH3PX1 SH3PXD3A	Sorting nexin-9 OS=Homo sapiens OX=9606 GN=SNX9 PE=1 SV=1	0	119.294	37	24	791	24	595	66.6	5.58	324.95	24	0	4.4306	4.40064	4.70049	4.34805	4.39533	4.61613	5.41177	5.61223	5.13778
P19474	TRIM21	0.619277	2.02301	0.00948393	0.0344242	+	C33A_C93	-0.691344	-4.67486	+	RNF81 RO52 SSA1	E3 ubiquitin-protein ligase TRIM21 OS=Homo sapiens OX=9606 GN=TRIM21 PE=1 SV=1	0	118.952	51	25	925	25	475	54.1	6.38	430.56	25	0	5.20505	5.06032	5.42963	5.80508	5.83862	6.12533	6.96234	7.3727	7.12847
Q15154	PCM1	1.13772	1.00211	0.0995149	0.141879			0.186141	2.13617			Pericentriolar material 1 protein OS=Homo sapiens OX=9606 GN=PCM1 PE=1 SV=6	0	118.918	15	27	335	27	2024	228.4	5.02	118.24	27	0	2.03377	2.17053	2.26856	2.07956	1.92805	1.90683	2.76444	2.49298	2.36149
P68366	TUBA4A	1.27473	0.363936	0.432577	0.547031			0.350193	0.871682		TUBA1	Tubulin alpha-4A chain OS=Homo sapiens OX=9606 GN=TUBA4A PE=1 SV=1	0	117.536	45	18	1086	5	448	49.9	5.06	544.71	18	0	0.33349	0.56318	-0.129507	-0.617868	-0.225518	0.55997	0.47074	0.569536	0.402475
P35527	KRT9	3.21422	2.63316	0.00232721	0.0212017	+	C33A_C93	1.68447	6.88908	+		Keratin, type I cytoskeletal 9 OS=Homo sapiens OX=9606 GN=KRT9 PE=1 SV=3	0	117.434	45	19	463	19	623	62	5.24	207.04	19	0	5.57909	5.17543	5.91029	3.74786	3.75109	4.11245	5.63456	5.9858	5.52467
P0DMV9	HSPA1B	1.04752	0.287331	0.516023	0.642894			0.066984	0.711581		HSP72	Heat shock 70 kDa protein 1B OS=Homo sapiens OX=9606 GN=HSPA1B PE=1 SV=1	0	116.203	49	24	680	14	641	70	5.66	308.32	24	4	4.85568	4.77815	4.59053	4.73091	4.57136	4.72113	4.79457	4.53135	4.70671
Q02878	RPL6	1.17798	0.781908	0.165231	0.210424			0.236316	1.69546		TXREB1	Large ribosomal subunit protein eL6 OS=Homo sapiens OX=9606 GN=RPL6 PE=1 SV=3	0	115.31	47	22	1203	22	288	32.7	10.58	643.5	22	0	7.90448	7.66154	7.68172	7.57917	7.28794	7.67169	8.02055	7.10444	7.72132
P14618	PKM	0.809925	0.880951	0.131537	0.173302			-0.30414	-1.8914		OIP3 PK2 PK3 PKM2	Pyruvate kinase PKM OS=Homo sapiens OX=9606 GN=PKM PE=1 SV=4	0	113.397	42	20	641	20	531	57.9	7.84	276.59	20	0	5.00063	5.31468	4.83379	5.43176	5.19913	5.43063	5.11054	4.82897	4.91945
Q7Z6Z7	HUWE1	0.877378	1.29268	0.0509705	0.0839683			-0.18873	-2.75769		KIAA0312 KIAA1578 UREB1	E3 ubiquitin-protein ligase HUWE1 OS=Homo sapiens OX=9606 GN=HUWE1 PE=1 SV=3	0	113.177	9	30	336	30	4374	481.6	5.22	113.73	30	0	1.51013	1.66288	1.59887	1.8685	1.6878	1.78177	1.56268	1.11905	1.45945
Q9HCE1	MOV10	1.40706	2.45078	0.00354178	0.0227958	+	C33A_C93	0.49268	6.15196	+	KIAA1631	Helicase MOV-10 OS=Homo sapiens OX=9606 GN=MOV10 PE=1 SV=2	0	112.981	31	25	550	25	1003	113.6	8.82	219.39	25	0	3.85883	3.71868	3.9433	3.35347	3.42428	3.26501	3.59488	3.65462	3.69255
O75962	TRIO	1.37614	2.33248	0.00465072	0.0252613	+	C33A_C93	0.460629	5.71044	+		Triple functional domain protein OS=Homo sapiens OX=9606 GN=TRIO PE=1 SV=2	0	112.845	13	30	256	30	3097	346.7	6.37	91.48	30	0	2.03846	2.21383	2.2703	1.74581	1.76168	1.63322	2.05599	1.37766	1.9772
P09874	PARP1	0.863804	0.70825	0.195772	0.247289			-0.211223	-1.55131		ADPRT PPOL	Poly [ADP-ribose] polymerase 1 OS=Homo sapiens OX=9606 GN=PARP1 PE=1 SV=4	0	112.688	29	25	390	25	1014	113	8.88	159.22	25	0	3.57962	3.7802	3.541	4.01871	3.62962	3.88615	3.40178	3.06192	3.31345
Q9BQG0	MYBBP1A	1.00163	0.00762732	0.982591	0.99188			0.00234493	0.0232149		P160	Myb-binding protein 1A OS=Homo sapiens OX=9606 GN=MYBBP1A PE=1 SV=2	0	112.573	26	27	318	27	1328	148.8	9.28	131.92	27	0	2.40414	2.37363	2.22625	2.18324	2.4768	2.33695	2.03082	1.92748	2.2869
Q92878	RAD50	0.800204	1.24612	0.0567382	0.0933117			-0.321561	-2.6541			DNA repair protein RAD50 OS=Homo sapiens OX=9606 GN=RAD50 PE=1 SV=1	0	111.138	27	30	338	30	1312	153.8	6.89	129.2	30	0	1.39531	0.993617	1.195	1.50327	1.58243	1.4629	1.57359	1.51279	1.11103
Q15293	RCN1	1.39627	1.3978	0.0400131	0.0724072			0.481581	2.9982		RCN	Reticulocalbin-1 OS=Homo sapiens OX=9606 GN=RCN1 PE=1 SV=1	0	110.975	66	19	666	19	331	38.9	5	317.24	19	0	6.46855	6.38229	6.73802	5.88362	5.97962	6.28088	3.07376	4.50116	3.26656
Q9Y446	PKP3	1.20172	0.940847	0.114592	0.154374			0.265101	2.01158			Plakophilin-3 OS=Homo sapiens OX=9606 GN=PKP3 PE=1 SV=1	0	110.792	32	22	443	22	797	87	9.32	204.18	22	0	3.16324	3.11457	2.92607	2.68692	2.69856	3.0231	3.5767	3.15719	3.14176
P22314	UBA1	0.924339	0.232504	0.585458	0.713727			-0.113506	-0.592385		A1S9T UBE1	Ubiquitin-like modifier-activating enzyme 1 OS=Homo sapiens OX=9606 GN=UBA1 PE=1 SV=3	0	110.738	29	23	438	23	1058	117.8	5.76	205.08	23	0	3.5898	3.97691	3.54275	3.61052	3.77307	4.06639	3.45577	3.12486	3.42145
Q9NZB2	FAM120A	1.30296	1.96355	0.0108754	0.0358053	+	C33A_C93	0.381787	4.49364		C9orf10 KIAA0183 OSSA	Constitutive coactivator of PPAR-gamma-like protein 1 OS=Homo sapiens OX=9606 GN=FAM120A PE=1 SV=2	0	110.244	27	25	458	24	1118	121.8	8.88	205.66	25	1	3.50091	3.4943	3.62031	3.19585	3.01275	3.26156	3.69799	3.8543	3.81968
O43390	HNRNPR	0.637439	3.01983	0.000955364	0.014922	+	C33A_C93	-0.649641	-8.71355	+	HNRPR	Heterogeneous nuclear ribonucleoprotein R OS=Homo sapiens OX=9606 GN=HNRNPR PE=1 SV=1	0	109.863	39	25	616	16	633	70.9	8.13	275.47	25	0	3.60836	3.42814	3.64589	4.16273	4.19663	4.27195	3.96038	4.3859	3.70821
Q14247	CTTN	2.36382	2.5473	0.00283597	0.0224784	+	C33A_C93	1.24112	6.53313	+	EMS1	Src substrate cortactin OS=Homo sapiens OX=9606 GN=CTTN PE=1 SV=2	0	109.644	34	22	1265	22	550	61.5	5.4	652.38	22	0	6.36357	6.29897	6.80497	5.14458	5.14358	5.45599	7.71085	7.84736	7.46205
P62424	RPL7A	1.20212	0.99593	0.100941	0.143266			0.265577	2.12352		SURF-3 SURF3	Large ribosomal subunit protein eL8 OS=Homo sapiens OX=9606 GN=RPL7A PE=1 SV=2	0	109.106	52	18	1102	18	266	30	10.61	476.53	18	0	7.5518	7.3401	7.19405	7.18595	6.95915	7.14412	7.41134	6.40774	7.12304
P19338	NCL	1.57471	2.58231	0.00261632	0.0215184	+	C33A_C93	0.655089	6.6763	+		Nucleolin OS=Homo sapiens OX=9606 GN=NCL PE=1 SV=3	0	108.698	35	27	774	27	710	76.6	4.7	368.91	27	0	5.62052	5.37067	5.41067	4.93203	4.74217	4.76238	5.49724	5.02584	5.29818
Q99613	EIF3C	0.777412	1.58804	0.0258204	0.0564187			-0.363249	-3.45989		EIF3S8	Eukaryotic translation initiation factor 3 subunit C OS=Homo sapiens OX=9606 GN=EIF3C PE=1 SV=1	0	108.503	29	24	462	24	913	105.3	5.68	230.75	24	0	4.47145	4.3399	4.69104	4.89014	4.88398	4.81801	3.62448	3.6452	3.61348
Q7Z2W4	ZC3HAV1	1.04924	0.547882	0.283216	0.351451			0.0693429	1.23859		ZC3HDC2	Zinc finger CCCH-type antiviral protein 1 OS=Homo sapiens OX=9606 GN=ZC3HAV1 PE=1 SV=3	0	107.722	34	24	473	23	902	101.4	8.4	199.48	24	0	3.50247	3.36002	3.36992	3.37993	3.27788	3.36656	3.52389	3.22078	3.42186
P09493	TPM1	0.728251	1.00337	0.099226	0.141482			-0.457493	-2.13876		C15orf13 TMSA	Tropomyosin alpha-1 chain OS=Homo sapiens OX=9606 GN=TPM1 PE=1 SV=2	0	107.288	49	20	876	8	284	32.7	4.74	440.16	20	0	2.55552	2.13448	2.50112	2.58394	2.8169	3.16277	2.41193	1.66786	2.48981
Q9Y520	PRRC2C	1.53168	2.03696	0.0091842	0.0323172	+	C33A_C93	0.615113	4.71814	+	BAT2D1 BAT2L2 KIAA1096 XTP2	Protein PRRC2C OS=Homo sapiens OX=9606 GN=PRRC2C PE=1 SV=4	0	106.918	11	27	304	27	2896	316.7	9.13	123.63	27	0	2.19217	2.3385	2.55846	1.83021	1.59761	1.81597	2.44531	1.94723	2.07981
Q92974	ARHGEF2	1.00764	0.0530625	0.884988	0.94578			0.0109746	0.154107		KIAA0651 LFP40	Rho guanine nucleotide exchange factor 2 OS=Homo sapiens OX=9606 GN=ARHGEF2 PE=1 SV=4	0	106.79	30	25	394	25	986	111.5	7.27	171.1	25	0	3.28182	3.19532	3.10933	3.26857	3.09272	3.19225	3.23043	2.93802	2.9521
P06733	ENO1	0.802747	0.427033	0.374082	0.470592			-0.316983	-0.999579		ENO1L1 MBPB1 MPB1	Alpha-enolase OS=Homo sapiens OX=9606 GN=ENO1 PE=1 SV=2	0	106.741	56	21	397	21	434	47.1	7.39	141.35	21	0	4.59929	4.61878	3.71808	4.77952	4.41233	4.69524	4.23705	4.10886	4.16048
P41252	IARS1	1.21843	1.45357	0.0351909	0.0693269			0.285022	3.12983		IARS	Isoleucine--tRNA ligase, cytoplasmic OS=Homo sapiens OX=9606 GN=IARS1 PE=1 SV=2	0	106.428	23	24	479	24	1262	144.4	6.15	208.77	24	0	4.35054	4.18825	4.28431	4.10816	4.01729	3.84257	4.64968	4.399	4.44661
Q6R327	RICTOR	0.95075	0.896988	0.126769	0.166294			-0.0728628	-1.92344		KIAA1999	Rapamycin-insensitive companion of mTOR OS=Homo sapiens OX=9606 GN=RICTOR PE=1 SV=1	0	105.664	19	25	373	25	1708	192.1	7.47	153.46	25	0	2.36793	2.26779	2.35173	2.3586	2.4223	2.42513	2.18253	1.69625	2.13367
P62701	RPS4X	1.26432	1.32615	0.0471904	0.0815489			0.338363	2.83323		CCG2 RPS4 SCAR	Small ribosomal subunit protein eS4, X isoform OS=Homo sapiens OX=9606 GN=RPS4X PE=1 SV=2	0	105.044	63	19	812	19	263	29.6	10.15	428.95	19	0	6.89519	6.69315	6.65198	6.49074	6.22316	6.51133	6.92695	6.29306	6.5658
P12268	IMPDH2	1.44331	1.69485	0.0201908	0.0497874	+	C33A_C93	0.529378	3.73602	+	IMPD2	Inosine-5'-monophosphate dehydrogenase 2 OS=Homo sapiens OX=9606 GN=IMPDH2 PE=1 SV=2	0	105.021	42	17	661	15	514	55.8	6.9	321.73	17	2	5.46369	5.45662	5.38839	5.10232	4.63635	4.98189	5.71204	5.20896	5.45625
Q9BXP5	SRRT	1.09454	0.439504	0.363493	0.456275			0.130326	1.02454		ARS2 ASR2	Serrate RNA effector molecule homolog OS=Homo sapiens OX=9606 GN=SRRT PE=1 SV=1	0	104.148	25	23	453	23	876	100.6	5.96	205.64	23	0	3.05897	2.90157	3.29189	3.02206	2.83916	3.00023	3.5342	3.99557	3.59598
O43707	ACTN4	1.15009	0.436116	0.36634	0.459095			0.201747	1.01777			Alpha-actinin-4 OS=Homo sapiens OX=9606 GN=ACTN4 PE=1 SV=2	0	103.92	31	25	530	14	911	104.8	5.44	260.68	25	8	3.27925	3.77786	3.58079	3.07568	3.45152	3.50547	2.93321	3.2533	3.15758
Q08J23	NSUN2	1.59726	1.50418	0.0313197	0.0660127			0.675599	3.25189	+	SAKI TRM4	RNA cytosine C(5)-methyltransferase NSUN2 OS=Homo sapiens OX=9606 GN=NSUN2 PE=1 SV=2	0	103.828	36	22	362	22	767	86.4	6.77	153.6	22	0	2.79764	2.92781	2.49438	2.37613	1.82409	1.99281	2.70089	2.76522	2.56142
Q96N67	DOCK7	1.07713	0.168535	0.678367	0.797321			0.107195	0.446463		KIAA1771	Dedicator of cytokinesis protein 7 OS=Homo sapiens OX=9606 GN=DOCK7 PE=1 SV=4	0	103.684	14	27	337	27	2140	242.4	6.8	133.22	27	0	2.56698	2.47643	2.60007	2.85187	2.03005	2.43997	2.98611	2.89363	3.12359
P06753	TPM3	0.686238	1.6656	0.0215973	0.0511699			-0.54322	-3.65911	+		Tropomyosin alpha-3 chain OS=Homo sapiens OX=9606 GN=TPM3 PE=1 SV=2	0	103.425	44	19	1279	8	285	32.9	4.72	582.4	19	0	5.96189	5.73983	5.89271	6.19672	6.37327	6.65411	6.08787	5.06769	6.14878
P0DPH8	TUBA3D	0.91138	0.889349	0.129018	0.171075			-0.133876	-1.90817			Tubulin alpha-3D chain OS=Homo sapiens OX=9606 GN=TUBA3D PE=1 SV=1	0	103.04	40	15	1045	0	450	49.9	5.1	518.64	15	0	7.58315	7.47988	7.50721	7.68692	7.53643	7.74852	8.09047	7.6956	7.83725
P42704	LRPPRC	1.55143	1.30759	0.0492506	0.0832097			0.633599	2.79122		LRP130	Leucine-rich PPR motif-containing protein, mitochondrial OS=Homo sapiens OX=9606 GN=LRPPRC PE=1 SV=3	0	102.161	21	25	282	25	1394	157.8	6.13	120.55	25	0	2.30631	2.13652	2.6047	1.93565	1.8547	1.35638	3.40991	3.7179	3.66695
O43143	DHX15	1.06608	0.259873	0.549702	0.678813			0.0923222	0.652458		DBP1 DDX15	ATP-dependent RNA helicase DHX15 OS=Homo sapiens OX=9606 GN=DHX15 PE=1 SV=2	0	102.001	27	22	566	22	795	90.9	7.46	247.73	22	0	4.21545	4.55717	4.66279	4.44126	4.4144	4.30279	4.5516	4.14048	4.13941
Q7KZF4	SND1	1.24662	0.647469	0.225181	0.280538			0.318021	1.43286		TDRD11	Staphylococcal nuclease domain-containing protein 1 OS=Homo sapiens OX=9606 GN=SND1 PE=1 SV=1	0	101.785	34	25	434	25	910	101.9	7.17	177.19	25	0	2.75366	3.4023	2.7487	2.56996	2.64994	2.73068	2.55693	1.77688	2.50165
Q9Y6K5	OAS3	0.644073	5.53014	2.95025e-06	0	+	C33A_C93	-0.634705	-37.7194	+		2'-5'-oligoadenylate synthase 3 OS=Homo sapiens OX=9606 GN=OAS3 PE=1 SV=3	0	101.729	26	24	381	24	1087	121.1	8.4	153.51	24	0	2.92115	2.9027	2.94809	3.57524	3.53933	3.56147	2.81007	2.10616	2.70098
P51114	FXR1	2.07846	4.36997	4.26605e-05	0.0146667	+	C33A_C93	1.05551	19.2794	+		RNA-binding protein FXR1 OS=Homo sapiens OX=9606 GN=FXR1 PE=1 SV=3	0	101.398	40	21	452	20	621	69.7	6.15	191.16	21	1	4.32977	4.2811	4.2644	3.25025	3.14154	3.31694	4.00995	3.44222	3.75977
O00267	SUPT5H	0.801621	1.62652	0.0236309	0.0527361			-0.319007	-3.55788		SPT5 SPT5H	Transcription elongation factor SPT5 OS=Homo sapiens OX=9606 GN=SUPT5H PE=1 SV=1	0	101.311	23	21	338	21	1087	120.9	5.06	128.33	21	0	2.94778	2.96	3.22078	3.34068	3.3729	3.37202	3.64442	4.1042	3.88717
Q96KG9	SCYL1	1.23684	1.30825	0.0491759	0.0831887			0.306655	2.79271		CVAK90 GKLP NTKL TAPK TEIF TRAP	N-terminal kinase-like protein OS=Homo sapiens OX=9606 GN=SCYL1 PE=1 SV=1	0	101.158	34	19	438	19	808	89.6	6.3	197.41	19	0	4.06798	3.97066	4.23722	3.69182	3.72516	3.93892	4.67742	4.81171	4.65232
Q13435	SF3B2	1.33193	1.75938	0.0174028	0.0450179	+	C33A_C93	0.413517	3.90939		SAP145	Splicing factor 3B subunit 2 OS=Homo sapiens OX=9606 GN=SF3B2 PE=1 SV=2	0	101.076	26	20	304	20	895	100.2	5.67	116.16	20	0	2.72662	2.73531	2.86077	2.49239	2.17271	2.41705	2.6011	2.39843	2.52508
O95239	KIF4A	2.61454	2.91905	0.00120489	0.014988	+	C33A_C93	1.38656	8.20035	+	KIF4	Chromosome-associated kinesin KIF4A OS=Homo sapiens OX=9606 GN=KIF4A PE=1 SV=3	0	101.074	25	25	334	15	1232	139.8	6.27	137.19	25	3	2.07106	2.28179	2.56172	0.802742	1.09923	0.852909	2.92927	3.32915	3.04531
Q92620	DHX38	0.963378	0.151366	0.705722	0.81799			-0.0538256	-0.405707		DDX38 KIAA0224 PRP16	Pre-mRNA-splicing factor ATP-dependent RNA helicase PRP16 OS=Homo sapiens OX=9606 GN=DHX38 PE=1 SV=2	0	100.632	20	21	303	21	1227	140.4	6.54	134.59	21	0	2.29922	2.07994	2.48967	2.23846	2.44594	2.34591	2.84983	3.12011	2.73345
P16615	ATP2A2	0.641886	3.01634	0.000963069	0.0147133	+	C33A_C93	-0.639611	-8.6953	+	ATP2B	Sarcoplasmic/endoplasmic reticulum calcium ATPase 2 OS=Homo sapiens OX=9606 GN=ATP2A2 PE=1 SV=1	0	100.584	25	21	452	21	1042	114.7	5.34	204.77	21	0	3.98296	3.82733	3.82134	4.4753	4.45669	4.61847	4.02491	3.6741	3.8937
Q93008	USP9X	0.847486	1.59275	0.0255418	0.0562114			-0.238739	-3.4718		DFFRX FAM USP9	Probable ubiquitin carboxyl-terminal hydrolase FAF-X OS=Homo sapiens OX=9606 GN=USP9X PE=1 SV=4	0	99.155	12	25	297	15	2554	290.3	5.8	120.13	25	6	1.22882	1.15817	1.38516	1.50439	1.51732	1.46665	1.37788	1.14149	1.43524
Q6PKG0	LARP1	1.05598	0.670751	0.213427	0.268767			0.0785892	1.47821		KIAA0731 LARP	La-related protein 1 OS=Homo sapiens OX=9606 GN=LARP1 PE=1 SV=2	0	99.04	27	22	438	22	1096	123.4	8.82	188.44	22	0	3.72086	3.62717	3.69868	3.69321	3.56702	3.55072	3.7622	3.54707	3.71157
P49411	TUFM	1.06937	0.342631	0.454327	0.570848			0.0967596	0.827772			Elongation factor Tu, mitochondrial OS=Homo sapiens OX=9606 GN=TUFM PE=1 SV=3	0	98.612	47	17	466	17	455	49.8	7.61	224.1	17	0	4.91529	4.74041	4.57972	4.60481	4.5634	4.77693	5.00396	4.82487	4.91748
Q07065	CKAP4	0.66583	3.92516	0.000118805	0.00758974	+	C33A_C93	-0.586775	-14.8795	+		Cytoskeleton-associated protein 4 OS=Homo sapiens OX=9606 GN=CKAP4 PE=1 SV=2	0	98.463	46	21	588	21	602	66	5.92	273.53	21	0	4.11904	4.03074	4.04754	4.68525	4.59539	4.677	4.47722	3.81776	4.0937
Q00341	HDLBP	1.47815	2.30968	0.00490142	0.0255044	+	C33A_C93	0.563793	5.62842	+	HBP VGL	Vigilin OS=Homo sapiens OX=9606 GN=HDLBP PE=1 SV=3	0	97.865	23	23	432	23	1268	141.4	6.87	170.92	23	0	2.94842	3.17561	3.12364	2.56603	2.61453	2.37573	3.02057	2.99679	2.95735
O94964	MTCL2	2.58574	1.83666	0.014566	0.0402963	+	C33A_C93	1.37058	4.12391	+	C20orf117 KIAA0889 SOGA SOGA1	Microtubule cross-linking factor 2 OS=Homo sapiens OX=9606 GN=MTCL2 PE=1 SV=3	0	97.654	19	25	236	23	1661	183.7	6.52	76.24	25	1	0.766392	0.537714	0.569026	-1.17899	-0.110857	-0.948754	2.49993	-0.266012	2.39015
Q07666	KHDRBS1	0.99035	0.0287956	0.935846	0.9736			-0.0139898	-0.0856692		SAM68	KH domain-containing, RNA-binding, signal transduction-associated protein 1 OS=Homo sapiens OX=9606 GN=KHDRBS1 PE=1 SV=1	0	97.168	30	16	1131	13	443	48.2	8.66	646.1	16	2	6.52737	6.40241	6.83663	6.59822	6.43183	6.77833	7.7035	7.96938	7.51276
P43243	MATR3	0.579009	2.78898	0.00162562	0.0179368	+	C33A_C93	-0.788341	-7.57849	+	KIAA0723	Matrin-3 OS=Homo sapiens OX=9606 GN=MATR3 PE=1 SV=2	0	97.145	30	21	422	21	847	94.6	6.25	196.95	21	0	2.82542	2.75737	3.04443	3.61434	3.59891	3.77899	2.79466	2.98478	2.81126
Q14764	MVP	0.512684	2.68403	0.00206998	0.019638	+	C33A_C93	-0.963858	-7.10781	+	LRP	Major vault protein OS=Homo sapiens OX=9606 GN=MVP PE=1 SV=4	0	97.132	31	20	351	20	893	99.3	5.48	142.84	20	0	2.16463	1.99372	1.73823	3.01623	2.94477	2.82715	2.25138	2.40749	2.05613
P11021	HSPA5	0.842714	2.16349	0.00686299	0.0288475	+	C33A_C93	-0.246886	-5.12485		GRP78	Endoplasmic reticulum chaperone BiP OS=Homo sapiens OX=9606 GN=HSPA5 PE=1 SV=2	0	97.015	34	21	468	19	654	72.3	5.16	186.17	21	0	2.89566	2.94147	2.87987	3.13431	3.08625	3.2371	2.76825	2.87765	2.8318
Q2M1P5	KIF7	1.09764	0.186412	0.651011	0.775756			0.134407	0.488125			Kinesin-like protein KIF7 OS=Homo sapiens OX=9606 GN=KIF7 PE=1 SV=2	0	96.829	25	25	353	24	1343	150.5	6.79	131.14	25	0	0.857246	0.388686	1.20197	0.400982	0.864023	0.779678	1.1004	1.19992	1.08958
Q04637	EIF4G1	2.17006	3.15927	0.000692994	0.0158632	+	C33A_C93	1.11774	9.47231	+	EIF4F EIF4G EIF4GI	Eukaryotic translation initiation factor 4 gamma 1 OS=Homo sapiens OX=9606 GN=EIF4G1 PE=1 SV=4	0	96.705	17	23	340	22	1599	175.4	5.33	155.03	23	1	2.81853	2.87111	3.07253	1.73234	1.6967	1.97992	2.89894	3.1015	2.89313
Q9BYK8	HELZ2	0.511971	0.295718	0.506153	0.629008			-0.965866	-0.729436		KIAA1769 PRIC285	3'-5' exoribonuclease HELZ2 OS=Homo sapiens OX=9606 GN=HELZ2 PE=1 SV=7	0	96.232	11	29	259	29	2896	322.1	8	75.74	29	0	-5.88542	-2.40745	-1.7632	-2.79387	-2.64913	-1.71547	-3.90193	-3.04227	-2.79462
Q13459	MYO9B	1.61523	1.37048	0.0426105	0.0754483			0.691743	2.93477		MYR5	Unconventional myosin-IXb OS=Homo sapiens OX=9606 GN=MYO9B PE=1 SV=3	0	96.07	13	24	232	23	2157	243.2	8.75	85.41	24	0	2.05981	1.92026	1.73248	1.4737	0.784324	1.37931	1.57926	1.22678	1.56794
P51991	HNRNPA3	0.680183	2.24839	0.00564425	0.0266295	+	C33A_C93	-0.556006	-5.41272	+	HNRPA3	Heterogeneous nuclear ribonucleoprotein A3 OS=Homo sapiens OX=9606 GN=HNRNPA3 PE=1 SV=2	0	96.047	44	17	225	17	378	39.6	9.01	79.15	17	0	3.21242	2.99849	3.10248	3.8064	3.5224	3.65261	3.04811	3.11162	2.9245
B5ME19	EIF3CL	0.774509	1.62634	0.0236407	0.0527692			-0.368647	-3.55742			Eukaryotic translation initiation factor 3 subunit C-like protein OS=Homo sapiens OX=9606 GN=EIF3CL PE=1 SV=1	0	95.56	28	22	451	22	914	105.4	5.64	222.17	22	0	4.45855	4.31683	4.66684	4.86886	4.87024	4.80907	3.61113	3.6347	3.58211
Q13751	LAMB3	1.33208	1.16457	0.0684592	0.106383			0.413685	2.47661		LAMNB1	Laminin subunit beta-3 OS=Homo sapiens OX=9606 GN=LAMB3 PE=1 SV=1	0	95.202	27	24	366	24	1172	129.5	7.21	155	24	0	2.91098	2.5785	2.66285	2.5501	2.08938	2.27179	2.88772	2.8405	2.68526
P23396	RPS3	1.40808	2.4553	0.00350506	0.0229547	+	C33A_C93	0.493729	6.1694	+		Small ribosomal subunit protein uS3 OS=Homo sapiens OX=9606 GN=RPS3 PE=1 SV=2	0	95.198	58	13	1073	13	243	26.7	9.66	532.61	13	0	7.15684	7.29836	7.08602	6.74118	6.58664	6.73222	7.23939	6.63293	6.89837
Q12906	ILF3	1.48766	2.71216	0.00194017	0.0190476	+	C33A_C93	0.573048	7.23135	+	DRBF MPHOSPH4 NF90	Interleukin enhancer-binding factor 3 OS=Homo sapiens OX=9606 GN=ILF3 PE=1 SV=3	0	95.118	20	16	338	13	894	95.3	8.76	118.31	16	3	3.60576	3.48365	3.69011	2.91679	3.07925	3.06433	3.93878	3.82558	3.63771
P52272	HNRNPM	0.847149	0.975946	0.105695	0.147422			-0.239312	-2.08274		HNRPM NAGR1	Heterogeneous nuclear ribonucleoprotein M OS=Homo sapiens OX=9606 GN=HNRNPM PE=1 SV=3	0	95.068	28	21	734	21	730	77.5	8.7	348.91	21	0	5.53521	5.41503	5.25975	5.71178	5.47788	5.73826	5.34032	4.7254	5.16696
P68104	EEF1A1	1.15018	0.72271	0.189361	0.238945			0.201858	1.57954		EEF1A EF1A LENG7	Elongation factor 1-alpha 1 OS=Homo sapiens OX=9606 GN=EEF1A1 PE=1 SV=1	0	95.033	42	14	781	8	462	50.1	9.01	338.37	14	5	6.71333	6.78264	6.51696	6.49597	6.28404	6.62733	7.11077	6.6413	6.74314
Q5VTE0	EEF1A1P5	1.15018	0.72271	0.189361	0.238804			0.201858	1.57954		EEF1AL3	Putative elongation factor 1-alpha-like 3 OS=Homo sapiens OX=9606 GN=EEF1A1P5 PE=5 SV=1	0	95.033	42	14	781	8	462	50.2	9.07	338.37	14	0	6.71333	6.78264	6.51696	6.49597	6.28404	6.62733	7.11077	6.6413	6.74314
P08729	KRT7	1.13192	1.14079	0.0723117	0.110084			0.178767	2.42576		SCL	Keratin, type II cytoskeletal 7 OS=Homo sapiens OX=9606 GN=KRT7 PE=1 SV=5	0	94.895	43	21	762	18	469	51.4	5.48	399.48	21	1	5.00382	5.02503	4.91291	4.74633	4.72741	4.93172	5.03898	4.74275	5.02385
O60841	EIF5B	2.39749	2.63138	0.0023368	0.0211111	+	C33A_C93	1.26153	6.88151	+	IF2 KIAA0741	Eukaryotic translation initiation factor 5B OS=Homo sapiens OX=9606 GN=EIF5B PE=1 SV=4	0	94.892	20	23	287	23	1220	138.7	5.49	96.35	23	0	2.62903	2.50737	2.60149	1.49997	1.49473	0.95862	2.22697	2.10145	2.32996
P54136	RARS1	1.09604	0.646179	0.225851	0.281233			0.132299	1.43035		RARS	Arginine--tRNA ligase, cytoplasmic OS=Homo sapiens OX=9606 GN=RARS1 PE=1 SV=2	0	94.4	37	22	441	22	660	75.3	6.68	211.05	22	0	3.65032	3.51675	3.65528	3.48693	3.60849	3.33002	4.16293	3.7726	3.83665
Q9NS87	KIF15	1.34263	1.34409	0.0452806	0.0800126			0.425059	2.87411		KLP2 KNSL7	Kinesin-like protein KIF15 OS=Homo sapiens OX=9606 GN=KIF15 PE=1 SV=1	0	94.073	21	24	238	24	1388	160.1	6	85.52	24	0	2.60961	2.50293	2.82392	2.12701	2.08729	2.44699	-1.90369	-1.36852	-1.71045
O14950	MYL12B	0.661698	1.53077	0.0294599	0.0658611			-0.595755	-3.31704	+	MRLC2 MYLC2B	Myosin regulatory light chain 12B OS=Homo sapiens OX=9606 GN=MYL12B PE=1 SV=2	0	94.043	56	12	2301	12	172	19.8	4.84	1256.51	12	0	9.67807	9.25651	9.20482	9.99631	9.79471	10.1356	9.74365	8.43635	9.44258
P19105	MYL12A	0.661698	1.53077	0.0294599	0.0657749			-0.595755	-3.31704	+	MLCB MRLC3 RLC	Myosin regulatory light chain 12A OS=Homo sapiens OX=9606 GN=MYL12A PE=1 SV=2	0	94.043	56	12	2301	12	171	19.8	4.81	1256.51	12	0	9.67807	9.25651	9.20482	9.99631	9.79471	10.1356	9.74365	8.43635	9.44258
Q86VI3	IQGAP3	2.83775	1.46031	0.0346491	0.0687923			1.50475	3.14594	+		Ras GTPase-activating-like protein IQGAP3 OS=Homo sapiens OX=9606 GN=IQGAP3 PE=1 SV=2	0	93.797	19	24	289	22	1631	184.6	7.65	103.23	24	0	1.15529	1.38521	1.24302	-1.0126	0.619835	-0.33796	1.04159	0.590513	1.27768
Q69YQ0	SPECC1L	2.19667	1.36524	0.0431277	0.0767024			1.13532	2.92268	+	CYTSA KIAA0376	Cytospin-A OS=Homo sapiens OX=9606 GN=SPECC1L PE=1 SV=3	0	92.897	20	20	237	20	1117	124.5	5.76	92.31	20	0	0.983154	2.01595	1.54604	-0.100144	0.731826	0.507522	1.69235	2.01794	1.75355
Q9UQ35	SRRM2	0.921863	0.686766	0.2057	0.258947			-0.117376	-1.50941		KIAA0324 SRL300 SRM300	Serine/arginine repetitive matrix protein 2 OS=Homo sapiens OX=9606 GN=SRRM2 PE=1 SV=2	0	92.89	12	23	330	23	2752	299.4	12.06	139.76	23	0	2.60383	2.58986	2.67281	2.879	2.63003	2.70959	2.28418	2.093	2.33338
Q9Y262	EIF3L	0.798169	1.1983	0.0633427	0.101064			-0.325233	-2.54945		EIF3EIP EIF3S6IP	Eukaryotic translation initiation factor 3 subunit L OS=Homo sapiens OX=9606 GN=EIF3L PE=1 SV=1	0	92.644	32	17	369	17	564	66.7	6.34	154.36	17	0	3.43095	3.29349	3.68674	3.7846	3.8955	3.70678	2.75488	2.70364	2.6223
P54886	ALDH18A1	0.862552	0.958129	0.110121	0.151779			-0.213316	-2.04655		GSAS P5CS PYCS	Delta-1-pyrroline-5-carboxylate synthase OS=Homo sapiens OX=9606 GN=ALDH18A1 PE=1 SV=2	0	91.33	27	19	472	19	795	87.2	7.12	176.08	19	0	2.23486	2.31686	2.23875	2.53712	2.61316	2.28014	1.89882	1.6194	1.97862
P25705	ATP5F1A	1.09806	1.07174	0.0847732	0.125362			0.134963	2.28014		ATP5A ATP5A1 ATP5AL2 ATPM	ATP synthase subunit alpha, mitochondrial OS=Homo sapiens OX=9606 GN=ATP5F1A PE=1 SV=1	0	90.828	37	16	601	16	553	59.7	9.13	285.48	16	0	4.84794	4.74134	4.66748	4.58702	4.59251	4.67234	4.83055	4.8383	4.82005
P47897	QARS1	1.115	0.591055	0.256416	0.318328			0.15704	1.32294		QARS	Glutamine--tRNA ligase OS=Homo sapiens OX=9606 GN=QARS1 PE=1 SV=1	0	90.79	32	24	393	24	775	87.7	7.15	151.74	24	0	2.39463	2.42183	2.47109	2.47183	2.27654	2.06807	2.72309	2.60396	2.58203
P23258	TUBG1	1.14443	1.80119	0.0158054	0.0423294	+	C33A_C93	0.194631	4.0245		TUBG	Tubulin gamma-1 chain OS=Homo sapiens OX=9606 GN=TUBG1 PE=1 SV=2	0	90.734	48	19	384	19	451	51.1	6.14	145.19	19	0	3.06914	3.00502	3.01209	2.91536	2.76468	2.82233	3.39436	3.19001	3.25131
Q96S66	CLCC1	1.65629	0.706795	0.196429	0.247614			0.727953	1.54847		KIAA0761 MCLC	Chloride channel CLIC-like protein 1 OS=Homo sapiens OX=9606 GN=CLCC1 PE=1 SV=1	0	90.612	45	20	125	20	551	62	5.55	44.89	20	0	-0.999915	-1.28582	-0.0203166	-1.30848	-1.14802	-2.03342	3.1159	3.16458	2.67798
P42695	NCAPD3	2.18715	2.56414	0.00272813	0.0222834	+	C33A_C93	1.12905	6.60165	+	CAPD3 KIAA0056	Condensin-2 complex subunit D3 OS=Homo sapiens OX=9606 GN=NCAPD3 PE=1 SV=2	0	90.495	22	24	209	24	1498	168.8	7.5	68.38	24	0	2.20019	2.38035	2.24916	1.07561	1.45768	0.90925	1.6268	1.26195	1.56869
P15311	EZR	1.25104	0.688708	0.204782	0.257187			0.323127	1.5132		VIL2	Ezrin OS=Homo sapiens OX=9606 GN=EZR PE=1 SV=4	0	90.467	31	22	365	16	586	69.4	6.27	185.96	22	0	1.86932	2.15948	1.94868	1.90643	1.81946	1.28221	1.86028	1.77279	1.7808
Q7Z478	DHX29	1.90974	2.75735	0.00174844	0.0195077	+	C33A_C93	0.933374	7.4338	+	DDX29	ATP-dependent RNA helicase DHX29 OS=Homo sapiens OX=9606 GN=DHX29 PE=1 SV=2	0	90.465	17	20	356	19	1369	155.1	8.09	156.2	20	1	2.89355	3.1272	3.14416	2.30506	2.07922	1.98051	2.86581	2.31071	2.53416
P51659	HSD17B4	0.978801	0.0553297	0.88038	0.943593			-0.0309119	-0.160346		EDH17B4 SDR8C1	Peroxisomal multifunctional enzyme type 2 OS=Homo sapiens OX=9606 GN=HSD17B4 PE=1 SV=3	0	90.378	31	17	351	17	736	79.6	8.84	157.17	17	0	2.55056	3.18888	2.84461	2.78178	2.96388	2.93113	2.8178	2.86997	2.69525
A5YKK6	CNOT1	1.16875	1.75174	0.0177116	0.0461138	+	C33A_C93	0.224966	3.8886		CDC39 KIAA1007 NOT1	CCR4-NOT transcription complex subunit 1 OS=Homo sapiens OX=9606 GN=CNOT1 PE=1 SV=2	0	90.336	9	22	336	22	2376	266.8	7.11	139.4	22	0	1.89241	1.86881	1.91947	1.63146	1.59572	1.77862	1.89309	1.47966	1.8253
P13647	KRT5	9.50623	1.66514	0.0216204	0.0510931			3.24887	3.65789	+		Keratin, type II cytoskeletal 5 OS=Homo sapiens OX=9606 GN=KRT5 PE=1 SV=3	0	90.299	30	21	346	10	590	62.3	7.74	161.35	21	2	2.02238	1.94163	2.93574	-2.14372	-1.34714	0.644002	2.05918	3.12216	2.55861
P02545	LMNA	1.27382	1.55027	0.0281664	0.0638177			0.349156	3.36529		LMN1	Prelamin-A/C OS=Homo sapiens OX=9606 GN=LMNA PE=1 SV=1	0	89.855	37	21	300	20	664	74.1	7.02	126.89	21	1	3.51867	3.38449	3.53781	3.05015	3.02888	3.31447	3.48079	3.41066	3.53535
Q13200	PSMD2	1.13494	0.99791	0.100482	0.142755			0.182617	2.12757		TRAP2	26S proteasome non-ATPase regulatory subunit 2 OS=Homo sapiens OX=9606 GN=PSMD2 PE=1 SV=3	0	89.694	28	20	223	20	908	100.1	5.2	85.12	20	0	2.78721	3.0305	2.90647	2.72297	2.8121	2.64125	2.96502	2.69229	2.98035
Q8WUM4	PDCD6IP	0.913409	0.6147	0.242828	0.300069			-0.130666	-1.36903		AIP1 ALIX KIAA1375	Programmed cell death 6-interacting protein OS=Homo sapiens OX=9606 GN=PDCD6IP PE=1 SV=1	0	89.641	27	20	355	20	868	96	6.52	147.78	20	0	3.34763	3.43339	3.26312	3.32066	3.5211	3.5944	3.61391	3.0458	3.32924
P26038	MSN	1.11082	0.312411	0.487067	0.606861			0.151627	0.76471			Moesin OS=Homo sapiens OX=9606 GN=MSN PE=1 SV=3	0	89.511	33	24	335	17	577	67.8	6.4	161.65	24	6	3.97639	4.52219	3.93622	4.108	3.90541	3.96651	3.81341	3.80542	3.83323
P11586	MTHFD1	1.03049	0.226723	0.593303	0.721454			0.0433342	0.579532		MTHFC MTHFD	C-1-tetrahydrofolate synthase, cytoplasmic OS=Homo sapiens OX=9606 GN=MTHFD1 PE=1 SV=4	0	89.362	21	20	505	20	935	101.5	7.3	265.34	20	0	3.86498	3.9954	3.87255	3.85186	3.76958	3.98149	4.10223	4.03144	4.16048
Q13310	PABPC4	2.27061	3.4462	0.000357931	0.0158519	+	C33A_C93	1.18308	11.2314	+	APP1 PABP4	Polyadenylate-binding protein 4 OS=Homo sapiens OX=9606 GN=PABPC4 PE=1 SV=1	0	89.218	29	17	384	12	644	70.7	9.26	182.67	17	0	3.51374	3.56461	3.80539	2.54001	2.4444	2.35009	3.64303	3.57373	3.54938
Q9NYL9	TMOD3	0.684355	1.62987	0.0234495	0.0526132			-0.547184	-3.56648	+		Tropomodulin-3 OS=Homo sapiens OX=9606 GN=TMOD3 PE=1 SV=1	0	89.139	56	17	588	16	352	39.6	5.19	272.48	17	1	5.68962	5.54705	5.42109	6.10568	5.8676	6.32604	5.73345	4.74639	5.46893
P11940	PABPC1	2.11362	4.27402	5.3208e-05	0.0115789	+	C33A_C93	1.07971	18.2339	+	PAB1 PABP PABP1 PABPC2	Polyadenylate-binding protein 1 OS=Homo sapiens OX=9606 GN=PABPC1 PE=1 SV=2	0	88.984	28	18	535	9	636	70.6	9.5	254.26	18	6	5.38472	5.44707	5.53004	4.3688	4.30496	4.44894	5.3462	5.05756	5.19153
P55884	EIF3B	0.753047	1.48742	0.032552	0.0671106			-0.409189	-3.21119		EIF3S9	Eukaryotic translation initiation factor 3 subunit B OS=Homo sapiens OX=9606 GN=EIF3B PE=1 SV=3	0	88.46	26	17	386	17	814	92.4	5	185.15	17	0	3.466	3.46071	3.83789	4.04561	3.95901	3.98755	2.62947	3.07703	2.63887
P05198	EIF2S1	1.32909	1.95708	0.0110388	0.0358876	+	C33A_C93	0.410434	4.47422	+	EIF2A	Eukaryotic translation initiation factor 2 subunit 1 OS=Homo sapiens OX=9606 GN=EIF2S1 PE=1 SV=3	0	88.224	60	19	389	19	315	36.1	5.08	161.64	19	0	3.87914	4.06069	4.0197	3.7199	3.47838	3.52995	3.90346	3.17886	3.53495
P53618	COPB1	0.879223	0.825286	0.149525	0.19227			-0.1857	-1.78091		COPB	Coatomer subunit beta OS=Homo sapiens OX=9606 GN=COPB1 PE=1 SV=3	0	88.212	34	23	333	23	953	107.1	6.05	112.49	23	0	2.92625	2.93552	2.80094	2.97348	2.98352	3.26281	3.09714	2.78404	3.11832
Q5JTH9	RRP12	0.990905	0.0309709	0.93117	0.971428			-0.0131817	-0.0919345		KIAA0690	RRP12-like protein OS=Homo sapiens OX=9606 GN=RRP12 PE=1 SV=2	0	88.094	23	21	260	21	1297	143.6	8.75	92.33	21	0	1.89778	1.91477	1.58784	1.97236	1.82777	1.63982	1.52849	1.38778	1.51553
Q9UPY3	DICER1	1.18391	0.859713	0.13813	0.180563			0.243554	1.84912		DICER HERNA KIAA0928	Endoribonuclease Dicer OS=Homo sapiens OX=9606 GN=DICER1 PE=1 SV=3	0	87.62	15	21	251	21	1922	218.5	5.68	82.06	21	0	1.01153	1.25699	1.24382	0.719112	1.00898	1.05358	1.37006	1.90448	1.40673
P49368	CCT3	0.982256	0.153499	0.702265	0.815207			-0.025829	-0.410812		CCTG TRIC5	T-complex protein 1 subunit gamma OS=Homo sapiens OX=9606 GN=CCT3 PE=1 SV=4	0	87.274	38	19	445	19	545	60.5	6.49	185.79	19	0	3.67109	3.54765	3.6417	3.73848	3.63554	3.5639	3.59818	3.3871	3.55034
P60660	MYL6	0.711845	1.88536	0.013021	0.0368192	+	C33A_C93	-0.490365	-4.26314	+		Myosin light polypeptide 6 OS=Homo sapiens OX=9606 GN=MYL6 PE=1 SV=2	0	87.187	88	13	1020	10	151	16.9	4.65	543.47	13	4	8.65223	8.3986	8.26182	8.943	8.90369	8.93706	9.12578	8.04033	8.88232
Q9UHB6	LIMA1	1.6032	1.00134	0.0996928	0.141846			0.680951	2.13458		EPLIN SREBP3	LIM domain and actin-binding protein 1 OS=Homo sapiens OX=9606 GN=LIMA1 PE=1 SV=1	0	86.421	30	17	249	17	759	85.2	6.84	75.83	17	0	1.9105	2.79331	1.80609	1.60699	1.40323	1.45682	1.48425	2.24444	2.06631
O94915	FRYL	0.922082	0.382993	0.414007	0.522728			-0.117033	-0.910622		AF4P12 KIAA0826	Protein furry homolog-like OS=Homo sapiens OX=9606 GN=FRYL PE=1 SV=2	0	85.671	9	23	274	23	3013	339.4	5.58	101.97	23	0	2.0485	2.06026	2.41542	2.29028	2.21462	2.37038	-2.20731	-0.287557	-2.16021
Q9NYF8	BCLAF1	0.690544	1.37768	0.0419099	0.0749357			-0.534196	-2.95142		BTF KIAA0164	Bcl-2-associated transcription factor 1 OS=Homo sapiens OX=9606 GN=BCLAF1 PE=1 SV=2	0	85.401	29	21	322	20	920	106.1	9.98	124.57	21	1	2.03197	1.92374	2.17481	2.73704	2.74979	2.24628	1.83448	2.52187	1.74443
P42166	TMPO	2.52016	2.55364	0.00279486	0.022746	+	C33A_C93	1.33352	6.55887	+	LAP2	Lamina-associated polypeptide 2, isoform alpha OS=Homo sapiens OX=9606 GN=TMPO PE=1 SV=2	0	85.397	39	18	425	12	694	75.4	7.66	185.44	18	5	4.31772	4.29462	4.41992	3.34234	2.6523	3.03707	4.08087	3.81584	3.85109
Q12968	NFATC3	1.31148	1.82315	0.0150264	0.0404714	+	C33A_C93	0.391192	4.08583		NFAT4	Nuclear factor of activated T-cells, cytoplasmic 3 OS=Homo sapiens OX=9606 GN=NFATC3 PE=1 SV=1	0	85.323	21	16	294	16	1075	115.5	6.37	134.1	16	0	2.29107	2.15403	2.31201	1.82131	2.01876	1.74348	3.06282	3.35904	2.71691
P31943	HNRNPH1	1.06087	0.216541	0.607377	0.735304			0.0852491	0.556749		HNRPH HNRPH1	Heterogeneous nuclear ribonucleoprotein H OS=Homo sapiens OX=9606 GN=HNRNPH1 PE=1 SV=4	0	84.98	45	14	1052	7	449	49.2	6.3	508.13	14	7	5.57014	5.54219	5.8862	5.47944	5.47009	5.79325	6.44979	6.47147	6.13309
P28799	GRN	0.591203	2.09524	0.00803074	0.0315211	+	C33A_C93	-0.758276	-4.90229	+		Progranulin OS=Homo sapiens OX=9606 GN=GRN PE=1 SV=2	0	84.82	23	14	474	14	593	63.5	6.83	230.2	14	0	4.42041	4.11131	4.4554	5.08189	4.90057	5.27948	5.41615	5.22263	4.83108
P14923	JUP	0.741752	1.83094	0.0147592	0.0403713	+	C33A_C93	-0.430991	-4.10775	+	CTNNG DP3	Junction plakoglobin OS=Homo sapiens OX=9606 GN=JUP PE=1 SV=3	0	84.798	29	16	458	15	745	81.7	6.14	243	16	1	3.68101	3.49693	3.3691	3.84344	3.97714	4.01944	3.44941	2.90294	3.30531
O00308	WWP2	1.21058	1.05708	0.0876839	0.128376			0.275695	2.2496			NEDD4-like E3 ubiquitin-protein ligase WWP2 OS=Homo sapiens OX=9606 GN=WWP2 PE=1 SV=2	0	84.777	30	22	299	20	870	98.9	7.12	147.66	22	1	3.12931	2.91808	2.92398	2.8437	2.7849	2.51568	3.06839	2.38182	2.97804
O95340	PAPSS2	0.943838	0.596707	0.253101	0.315129			-0.0833893	-1.33396		ATPSK2	Bifunctional 3'-phosphoadenosine 5'-phosphosulfate synthase 2 OS=Homo sapiens OX=9606 GN=PAPSS2 PE=1 SV=2	0	84.757	36	18	319	17	614	69.5	8.03	113.55	18	1	2.73483	2.60039	2.67124	2.84914	2.71617	2.69133	3.0712	2.45622	2.54176
O75592	MYCBP2	0.957389	0.194247	0.639371	0.769054			-0.0628234	-0.506154		KIAA0916 PAM	E3 ubiquitin-protein ligase MYCBP2 OS=Homo sapiens OX=9606 GN=MYCBP2 PE=1 SV=4	0	84.67	6	24	205	24	4678	513.3	7.02	56.27	24	0	0.181833	0.450249	0.519091	0.58355	0.358434	0.39766	0.599412	0.300756	0.309109
O43242	PSMD3	0.972689	0.100187	0.793986	0.887502			-0.0399496	-0.279125			26S proteasome non-ATPase regulatory subunit 3 OS=Homo sapiens OX=9606 GN=PSMD3 PE=1 SV=2	0	84.357	37	20	290	20	534	60.9	8.44	125.59	20	0	2.89591	3.02526	2.8406	2.81086	3.22424	2.84653	3.11546	3.06718	2.94173
Q9H0A0	NAT10	1.71436	2.42022	0.00379994	0.0232318	+	C33A_C93	0.777671	6.03529	+	ALP KIAA1709	RNA cytidine acetyltransferase OS=Homo sapiens OX=9606 GN=NAT10 PE=1 SV=2	0	84.037	24	20	347	20	1025	115.7	8.27	144.2	20	0	3.04877	3.05257	2.9545	2.23227	2.02925	2.4613	2.98291	2.31652	2.87144
Q7L014	DDX46	1.12562	1.33863	0.0458528	0.0802872			0.170722	2.86166		KIAA0801	Probable ATP-dependent RNA helicase DDX46 OS=Homo sapiens OX=9606 GN=DDX46 PE=1 SV=2	0	83.827	20	20	443	20	1031	117.3	9.29	213.47	20	0	3.40688	3.35775	3.53401	3.30788	3.21038	3.26821	3.26329	3.30455	3.26035
Q9BUJ2	HNRNPUL1	1.30774	1.32302	0.0475314	0.0816222			0.387071	2.82613		E1BAP5 HNRPUL1	Heterogeneous nuclear ribonucleoprotein U-like protein 1 OS=Homo sapiens OX=9606 GN=HNRNPUL1 PE=1 SV=2	0	83.798	27	18	303	18	856	95.7	6.92	118.4	18	0	4.38487	4.05155	4.23879	3.64741	3.96668	3.89991	3.90121	3.90749	3.72464
O60610	DIAPH1	1.39094	1.52004	0.0301969	0.0660903			0.476061	3.29066		DIAP1	Protein diaphanous homolog 1 OS=Homo sapiens OX=9606 GN=DIAPH1 PE=1 SV=2	0	83.695	18	17	306	17	1272	141.3	5.41	134.83	17	0	3.52172	3.63797	3.31859	3.07962	2.80169	3.16878	3.40692	2.89068	3.38208
P04920	SLC4A2	1.48485	2.11423	0.00768721	0.0304976	+	C33A_C93	0.57032	4.96345	+	AE2 EPB3L1 HKB3 MPB3L	Anion exchange protein 2 OS=Homo sapiens OX=9606 GN=SLC4A2 PE=1 SV=4	0	83.621	20	19	337	19	1241	136.9	6.29	120.53	19	0	2.73846	2.38084	2.62901	1.96484	1.97042	2.10209	1.70268	1.05927	1.56383
Q9HCC0	MCCC2	0.678448	1.99684	0.010073	0.0346638	+	C33A_C93	-0.55969	-4.59444	+	MCCB	Methylcrotonoyl-CoA carboxylase beta chain, mitochondrial OS=Homo sapiens OX=9606 GN=MCCC2 PE=1 SV=1	0	83.399	34	17	206	17	563	61.3	7.68	64.26	17	0	1.80173	1.95579	1.60147	2.22111	2.37305	2.4439	1.91965	1.89578	2.12741
P31689	DNAJA1	1.22202	0.622149	0.238699	0.295284			0.289267	1.38354		DNAJ2 HDJ2 HSJ2 HSPF4	DnaJ homolog subfamily A member 1 OS=Homo sapiens OX=9606 GN=DNAJA1 PE=1 SV=2	0	83.28	44	16	302	16	397	44.8	7.08	133.5	16	0	3.46997	3.324	3.74091	3.31496	2.8933	3.45882	3.6645	3.06833	3.78321
P17858	PFKL	0.639969	1.92799	0.0118035	0.0367701	+	C33A_C93	-0.643926	-4.38773	+		ATP-dependent 6-phosphofructokinase, liver type OS=Homo sapiens OX=9606 GN=PFKL PE=1 SV=6	0	83.152	30	17	357	15	780	85	7.5	148.83	17	1	2.82643	2.63177	2.60852	3.30421	3.57003	3.12426	2.56375	2.83143	2.53659
Q15654	TRIP6	1.45425	1.31423	0.0485031	0.0821298			0.54028	2.80622		OIP1	Thyroid receptor-interacting protein 6 OS=Homo sapiens OX=9606 GN=TRIP6 PE=1 SV=3	0	82.937	43	13	247	13	476	50.3	7.37	90.17	13	0	1.70665	1.70031	2.11688	1.03215	1.43961	1.43124	2.75095	2.83552	2.55525
Q9NVI7	ATAD3A	2.34918	2.39642	0.00401399	0.0226413	+	C33A_C93	1.23216	5.9457	+		ATPase family AAA domain-containing protein 3A OS=Homo sapiens OX=9606 GN=ATAD3A PE=1 SV=2	0	82.651	30	18	551	9	634	71.3	8.98	269.21	18	8	4.84066	4.72153	4.79571	3.55385	3.19993	3.90766	4.89766	4.63348	4.76119
Q15029	EFTUD2	0.975755	0.191053	0.64409	0.771141			-0.0354096	-0.498821		KIAA0031 SNRP116	116 kDa U5 small nuclear ribonucleoprotein component OS=Homo sapiens OX=9606 GN=EFTUD2 PE=1 SV=1	0	82.477	30	20	385	20	972	109.4	5	148.54	20	0	2.89815	3.0262	3.06521	3.1257	2.9553	3.01479	2.82871	2.56906	2.65709
P23246	SFPQ	1.77307	3.06579	0.000859435	0.0157015	+	C33A_C93	0.826249	8.95719	+	PSF	Splicing factor, proline- and glutamine-rich OS=Homo sapiens OX=9606 GN=SFPQ PE=1 SV=2	0	82.468	30	15	467	14	707	76.1	9.44	163.72	15	1	5.03413	5.31097	5.18385	4.31794	4.29162	4.44063	4.78228	4.49928	4.70601
Q10567	AP1B1	1.08812	0.215102	0.609393	0.73696			0.121837	0.553513		ADTB1 BAM22 CLAPB2	AP-1 complex subunit beta-1 OS=Homo sapiens OX=9606 GN=AP1B1 PE=1 SV=3	0	82.396	24	18	261	7	949	104.5	5.06	103	18	0	-2.30503	-2.59686	-2.17912	-2.82492	-2.20438	-2.41723	-2.46118	-2.34831	-2.50137
P12814	ACTN1	1.02082	0.0576968	0.875595	0.941212			0.0297335	0.166834			Alpha-actinin-1 OS=Homo sapiens OX=9606 GN=ACTN1 PE=1 SV=2	0	82.23	24	19	485	8	892	103	5.41	251.37	19	0	-0.01082	0.41775	0.36317	-0.00636468	0.349709	0.337555	0.11637	-0.065845	0.088687
Q9Y2W1	THRAP3	0.8315	1.12514	0.0749655	0.113747			-0.266212	-2.39248		BCLAF2 TRAP150	Thyroid hormone receptor-associated protein 3 OS=Homo sapiens OX=9606 GN=THRAP3 PE=1 SV=2	0	82.049	18	18	378	17	955	108.6	10.15	185.95	18	0	2.09888	1.93597	2.05905	2.49284	2.23609	2.16359	1.74376	1.83514	1.75939
O00443	PIK3C2A	0.988201	0.0274411	0.938769	0.974443			-0.0171238	-0.0817546			Phosphatidylinositol 4-phosphate 3-kinase C2 domain-containing subunit alpha OS=Homo sapiens OX=9606 GN=PIK3C2A PE=1 SV=2	0	82.007	17	24	240	24	1686	190.6	8.02	82.18	24	0	0.860926	0.731621	1.05585	0.52713	1.11354	1.0591	0.796023	0.423367	0.781048
P50454	SERPINH1	0.653392	2.43622	0.00366252	0.0230204	+	C33A_C93	-0.61398	-6.09614	+	CBP1 CBP2 HSP47 SERPINH2	Serpin H1 OS=Homo sapiens OX=9606 GN=SERPINH1 PE=1 SV=2	0	81.864	42	15	367	15	418	46.4	8.69	137.07	15	0	4.09787	4.28964	3.95476	4.69013	4.78049	4.71359	4.18604	4.13198	4.06158
Q5T9A4	ATAD3B	2.66124	3.28485	0.000518976	0.0165	+	C33A_C93	1.4121	10.2077	+	KIAA1273 TOB3	ATPase family AAA domain-containing protein 3B OS=Homo sapiens OX=9606 GN=ATAD3B PE=1 SV=1	0	81.833	26	16	556	7	648	72.5	9.2	251.69	16	0	1.89685	2.17166	2.11065	0.466108	0.629407	0.847346	2.14726	2.01835	2.18011
Q08378	GOLGA3	0.752705	1.40412	0.0394349	0.0719593			-0.409843	-3.01297			Golgin subfamily A member 3 OS=Homo sapiens OX=9606 GN=GOLGA3 PE=1 SV=2	0	81.784	17	21	83	21	1498	167.3	5.44	28.21	21	0	1.73188	1.3021	1.63662	1.93677	2.04404	1.91933	2.61347	2.07407	2.11653
P50570	DNM2	0.946392	0.234363	0.582957	0.710303			-0.0794899	-0.596504		DYN2	Dynamin-2 OS=Homo sapiens OX=9606 GN=DNM2 PE=1 SV=2	0	81.51	28	21	294	16	870	98	7.44	102.35	21	3	2.64383	2.99365	2.73848	2.70721	2.9708	2.93643	0.990046	0.611458	1.22016
Q1KMD3	HNRNPUL2	0.91495	0.689838	0.20425	0.257096			-0.128236	-1.5154		HNRPUL2	Heterogeneous nuclear ribonucleoprotein U-like protein 2 OS=Homo sapiens OX=9606 GN=HNRNPUL2 PE=1 SV=1	0	81.442	25	18	274	18	747	85.1	4.91	113.48	18	0	2.05309	2.06476	2.30851	2.27866	2.24107	2.29133	2.48703	2.84048	2.68867
P35606	COPB2	0.724651	3.23033	0.000588402	0.0156	+	C33A_C93	-0.464641	-9.88209	+		Coatomer subunit beta' OS=Homo sapiens OX=9606 GN=COPB2 PE=1 SV=2	0	81.073	24	17	319	17	906	102.4	5.27	141.86	17	0	2.74259	2.83311	2.73007	3.17022	3.28695	3.24252	2.87859	2.46637	2.85143
Q9UPN4	CEP131	1.41955	0.908164	0.123548	0.163105			0.505429	1.94582		AZI1 KIAA1118	Centrosomal protein of 131 kDa OS=Homo sapiens OX=9606 GN=CEP131 PE=1 SV=3	0	81.014	25	24	124	24	1083	122.1	8.69	36.15	24	0	0.167826	0.505201	-0.162389	-0.568389	-0.442708	0.00544758	0.421613	0.399486	0.176602
P30101	PDIA3	0.510606	2.45562	0.00350249	0.023035	+	C33A_C93	-0.969718	-6.17063	+	ERP57 ERP60 GRP58	Protein disulfide-isomerase A3 OS=Homo sapiens OX=9606 GN=PDIA3 PE=1 SV=4	0	80.521	34	16	293	16	505	56.7	6.35	131.03	16	0	2.54564	2.89363	2.48964	3.70707	3.42585	3.70515	2.57769	2.39707	2.69182
P02533	KRT14	40.2245	2.63056	0.00234121	0.0210213	+	C33A_C93	5.33	6.87805	+		Keratin, type I cytoskeletal 14 OS=Homo sapiens OX=9606 GN=KRT14 PE=1 SV=4	0	80.477	35	18	375	4	472	51.5	5.16	174.58	18	8	2.32765	2.03041	2.87733	-2.59564	-4.32001	-1.83897	2.06187	2.98583	2.44107
Q9Y490	TLN1	0.747716	0.308391	0.491596	0.610951			-0.419438	-0.756247		KIAA1027 TLN	Talin-1 OS=Homo sapiens OX=9606 GN=TLN1 PE=1 SV=3	0	80.249	11	21	138	21	2541	269.6	6.07	38.9	21	0	-2.10882	-0.51874	-0.655126	-1.10301	-0.553545	-0.367817	-0.989558	-1.4933	-1.09147
Q96AQ6	PBXIP1	0.465921	2.00781	0.00982185	0.0343863	+	C33A_C93	-1.10184	-4.62801	+	HPIP	Pre-B-cell leukemia transcription factor-interacting protein 1 OS=Homo sapiens OX=9606 GN=PBXIP1 PE=1 SV=1	0	80.225	29	19	260	19	731	80.6	5.33	112.11	19	0	2.0704	1.32414	1.43705	2.72253	2.6169	2.79769	1.30785	1.27462	1.41555
P78332	RBM6	1.05483	0.1252	0.749549	0.853033			0.0770091	0.342022		DEF3	RNA-binding protein 6 OS=Homo sapiens OX=9606 GN=RBM6 PE=1 SV=5	0	79.852	23	21	262	20	1123	128.6	6.32	86.62	21	1	0.346813	0.403229	0.971144	0.50104	0.313382	0.675738	0.59821	1.32004	0.513703
P33993	MCM7	0.914792	1.73444	0.0184315	0.0478722	+	C33A_C93	-0.128484	-3.84178		CDC47 MCM2	DNA replication licensing factor MCM7 OS=Homo sapiens OX=9606 GN=MCM7 PE=1 SV=4	0	79.778	32	19	410	19	719	81.3	6.46	178.46	19	0	2.59851	2.58081	2.63722	2.74001	2.78096	2.68103	2.86861	2.80674	2.92644
Q9Y5B9	SUPT16H	1.38847	1.62756	0.0235746	0.052887			0.473498	3.56054		FACT140 FACTP140	FACT complex subunit SPT16 OS=Homo sapiens OX=9606 GN=SUPT16H PE=1 SV=1	0	79.589	25	21	307	21	1047	119.8	5.66	129.03	21	0	3.75971	3.76917	3.7407	3.53923	3.09478	3.21509	3.72914	2.97956	3.54407
Q14C86	GAPVD1	0.870795	1.71243	0.0193895	0.0488875	+	C33A_C93	-0.199595	-3.78276		GAPEX5 KIAA1521 RAP6	GTPase-activating protein and VPS9 domain-containing protein 1 OS=Homo sapiens OX=9606 GN=GAPVD1 PE=1 SV=2	0	79.543	18	20	276	20	1478	164.9	5.22	111.96	20	0	1.88967	2.02712	1.95131	2.14999	2.21835	2.09855	1.53008	1.91118	1.34264
Q9P0K7	RAI14	2.49913	2.87785	0.00132479	0.01552	+	C33A_C93	1.32143	7.99858	+	KIAA1334 NORPEG	Ankycorbin OS=Homo sapiens OX=9606 GN=RAI14 PE=1 SV=2	0	79.507	23	18	223	18	980	110	6.21	84.74	18	0	2.11851	2.65547	2.23479	0.963855	1.05168	1.02895	2.3133	2.23155	2.48638
P57678	GEMIN4	1.39797	1.37585	0.0420874	0.0748708			0.483331	2.94718			Gem-associated protein 4 OS=Homo sapiens OX=9606 GN=GEMIN4 PE=1 SV=2	0	79.354	20	19	333	19	1058	120	6.04	139.93	19	0	2.19339	2.01489	2.32023	1.43967	1.72411	1.91474	2.4899	2.30397	2.15669
Q9UHB9	SRP68	1.59654	2.69928	0.00199859	0.0190783	+	C33A_C93	0.67495	7.17453	+		Signal recognition particle subunit SRP68 OS=Homo sapiens OX=9606 GN=SRP68 PE=1 SV=2	0	79.315	31	20	302	20	627	70.7	8.56	132.74	20	0	2.63648	2.82328	2.72004	2.09211	1.9027	2.16013	2.79902	2.29068	2.69011
Q9Y678	COPG1	0.806014	1.09018	0.0812497	0.121213			-0.311123	-2.31873		COPG	Coatomer subunit gamma-1 OS=Homo sapiens OX=9606 GN=COPG1 PE=1 SV=1	0	79.21	30	17	338	17	874	97.7	5.47	132.96	17	0	2.84791	2.90459	2.49958	2.9985	3.03955	3.14741	2.85237	2.82695	2.8122
O76094	SRP72	1.36853	1.86224	0.0137328	0.038065	+	C33A_C93	0.452626	4.19665	+		Signal recognition particle subunit SRP72 OS=Homo sapiens OX=9606 GN=SRP72 PE=1 SV=3	0	79.084	38	18	278	18	671	74.6	9.26	115.2	18	0	2.77144	2.92079	2.65885	2.19161	2.45599	2.3456	2.744	2.22722	2.6371
P09651	HNRNPA1	2.07774	4.50438	3.13052e-05	0.0157143	+	C33A_C93	1.05502	20.8437	+	HNRPA1	Heterogeneous nuclear ribonucleoprotein A1 OS=Homo sapiens OX=9606 GN=HNRNPA1 PE=1 SV=5	0	78.996	50	15	341	14	372	38.7	9.13	141.9	15	1	4.30379	4.31761	4.30446	3.3529	3.1888	3.2191	4.40813	3.69839	3.99328
O15230	LAMA5	0.609903	2.04237	0.00907039	0.0318852	+	C33A_C93	-0.713348	-4.73503	+	KIAA0533 KIAA1907	Laminin subunit alpha-5 OS=Homo sapiens OX=9606 GN=LAMA5 PE=1 SV=8	0	78.903	7	20	169	20	3695	399.5	7.02	55.56	20	0	0.828022	0.484935	0.362135	1.17712	1.37443	1.26359	0.854797	0.595749	0.810086
P18124	RPL7	1.12675	0.906582	0.123999	0.163426			0.172173	1.94265			Large ribosomal subunit protein uL30 OS=Homo sapiens OX=9606 GN=RPL7 PE=1 SV=1	0	78.83	48	13	645	13	248	29.2	10.65	331.23	13	0	5.76309	5.59471	5.47758	5.49628	5.43493	5.38765	5.77198	5.19034	5.5852
Q86VP1	TAX1BP1	0.860239	0.96303	0.108885	0.150888			-0.21719	-2.05649		T6BP	Tax1-binding protein 1 OS=Homo sapiens OX=9606 GN=TAX1BP1 PE=1 SV=2	0	78.636	24	20	402	20	789	90.8	5.43	199.45	20	0	3.30037	3.33644	3.16139	3.48952	3.32236	3.63789	3.51495	3.10569	3.34205
P62917	RPL8	1.14204	0.52038	0.301731	0.375441			0.191609	1.18466			Large ribosomal subunit protein uL2 OS=Homo sapiens OX=9606 GN=RPL8 PE=1 SV=2	0	78.534	37	15	896	15	257	28	11.03	443.25	15	0	6.54322	6.39554	6.26111	6.35952	5.92922	6.33631	6.7015	5.73473	6.24199
P39023	RPL3	1.16161	0.886419	0.129892	0.171583			0.216127	1.90231			Large ribosomal subunit protein uL3 OS=Homo sapiens OX=9606 GN=RPL3 PE=1 SV=2	0	78.528	35	14	515	14	403	46.1	10.18	219.95	14	0	5.74079	5.73961	5.62353	5.69745	5.39886	5.35924	6.04861	5.44266	5.89309
Q9UKK3	PARP4	0.945678	0.178274	0.663324	0.785765			-0.0805786	-0.469253		ADPRTL1 KIAA0177 PARPL	Protein mono-ADP-ribosyltransferase PARP4 OS=Homo sapiens OX=9606 GN=PARP4 PE=1 SV=3	0	78.414	14	20	269	20	1724	192.5	5.66	100.28	20	0	1.22665	1.00858	1.54987	1.39438	1.42693	1.20553	2.08161	2.4203	2.03649
Q8N1F7	NUP93	0.751481	1.40296	0.0395405	0.0721443			-0.412192	-3.01025		KIAA0095	Nuclear pore complex protein Nup93 OS=Homo sapiens OX=9606 GN=NUP93 PE=1 SV=2	0	78.404	33	22	439	22	819	93.4	5.72	196.7	22	0	4.05985	3.72455	3.76172	4.35298	4.08794	4.34177	3.81893	3.07509	3.37023
Q9NRH3	TUBG2	1.14785	1.7071	0.0196289	0.0490966	+	C33A_C93	0.198937	3.76856			Tubulin gamma-2 chain OS=Homo sapiens OX=9606 GN=TUBG2 PE=2 SV=1	0	78.398	40	16	309	16	451	51.1	5.8	102.09	16	0	2.82365	2.76855	2.74599	2.67496	2.52506	2.54136	3.13857	2.95921	3.03797
P46781	RPS9	1.20729	1.20463	0.0624268	0.101287			0.27177	2.56319			Small ribosomal subunit protein uS4 OS=Homo sapiens OX=9606 GN=RPS9 PE=1 SV=3	0	78.379	59	16	1332	16	194	22.6	10.65	704.99	16	0	7.3773	7.17147	7.17216	7.0258	6.80879	7.07103	7.33641	6.74817	7.05957
Q9Y608	LRRFIP2	0.824705	1.30347	0.0497193	0.083409			-0.278049	-2.78195			Leucine-rich repeat flightless-interacting protein 2 OS=Homo sapiens OX=9606 GN=LRRFIP2 PE=1 SV=1	0	78.357	22	16	354	16	721	82.1	6.95	176.13	16	0	4.07715	4.06231	3.86585	4.34847	4.13359	4.35741	4.02972	2.90188	3.75779
P52597	HNRNPF	0.961325	0.250511	0.56168	0.690149			-0.056904	-0.632046		HNRPF	Heterogeneous nuclear ribonucleoprotein F OS=Homo sapiens OX=9606 GN=HNRNPF PE=1 SV=3	0	77.843	31	9	747	7	415	45.6	5.58	319.88	9	0	5.15135	5.19572	5.39919	5.28114	5.39792	5.23792	5.68479	6.12414	5.89372
Q6PEY2	TUBA3E	0.942225	0.529888	0.295197	0.366756			-0.0858561	-1.20333			Tubulin alpha-3E chain OS=Homo sapiens OX=9606 GN=TUBA3E PE=1 SV=2	0	77.81	32	11	821	0	450	49.8	5.14	420.55	11	0	7.37618	7.28295	7.34422	7.38987	7.32447	7.54657	7.88832	7.51503	7.65767
Q09666	AHNAK	2.4406	3.09307	0.000807105	0.0152308	+	C33A_C93	1.28724	9.10478	+	PM227	Neuroblast differentiation-associated protein AHNAK OS=Homo sapiens OX=9606 GN=AHNAK PE=1 SV=2	0	77.749	8	21	177	21	5890	628.7	6.15	61.5	21	0	1.74928	1.73663	1.88936	0.3053	0.452424	0.755833	1.53748	1.32713	1.58034
Q13772	NCOA4	0.984342	0.148401	0.710556	0.82037			-0.0227679	-0.39859		ARA70 ELE1 RFG	Nuclear receptor coactivator 4 OS=Homo sapiens OX=9606 GN=NCOA4 PE=1 SV=1	0	77.591	32	14	359	14	614	69.7	6.01	185.36	14	0	3.83147	3.87225	3.72987	3.82635	3.77168	3.90387	3.90684	3.74019	3.99617
P62906	RPL10A	1.26504	1.43824	0.0364553	0.069238			0.33918	3.09336		NEDD6	Large ribosomal subunit protein uL1 OS=Homo sapiens OX=9606 GN=RPL10A PE=1 SV=2	0	77.578	47	13	780	13	217	24.8	9.94	340.53	13	0	7.10454	6.79781	6.84725	6.63146	6.46814	6.63247	6.92159	6.22193	6.81991
O75676	RPS6KA4	1.65801	1.77034	0.0169693	0.0445601	+	C33A_C93	0.729455	3.93933	+	MSK2	Ribosomal protein S6 kinase alpha-4 OS=Homo sapiens OX=9606 GN=RPS6KA4 PE=1 SV=1	0	77.369	27	17	201	17	772	85.6	8.28	78.29	17	0	1.63025	1.78766	1.46112	0.579502	1.08103	1.03013	1.3887	1.07019	1.52657
O43823	AKAP8	0.737279	1.14168	0.0721646	0.10999			-0.439718	-2.42764		AKAP95	A-kinase anchor protein 8 OS=Homo sapiens OX=9606 GN=AKAP8 PE=1 SV=1	0	77.328	33	18	333	18	692	76.1	5.15	132.72	18	0	2.9605	2.81874	3.21038	3.40122	3.21257	3.69499	3.84656	3.87785	3.44413
P49588	AARS1	1.21285	1.2155	0.060883	0.0994382			0.278406	2.58689		AARS	Alanine--tRNA ligase, cytoplasmic OS=Homo sapiens OX=9606 GN=AARS1 PE=1 SV=2	0	77.068	23	17	341	17	968	106.7	5.53	175.59	17	0	3.41276	3.62461	3.32317	3.14354	3.0907	3.29108	3.38689	2.94488	3.28862
O15269	SPTLC1	1.26126	1.15835	0.0694468	0.107795			0.334867	2.46327		LCB1	Serine palmitoyltransferase 1 OS=Homo sapiens OX=9606 GN=SPTLC1 PE=1 SV=1	0	77.008	44	17	419	17	473	52.7	6.01	226.49	17	0	4.14256	3.93298	3.87313	3.66878	3.825	3.45029	4.27639	3.58003	3.96416
Q15021	NCAPD2	1.22812	0.712447	0.193889	0.244173			0.296447	1.5595		CAPD2 CNAP1 KIAA0159	Condensin complex subunit 1 OS=Homo sapiens OX=9606 GN=NCAPD2 PE=1 SV=3	0	76.886	19	20	210	20	1401	157.1	6.61	73.43	20	0	2.1315	1.86728	2.17102	2.04971	1.75048	1.48028	1.85257	1.29643	1.70391
P10809	HSPD1	1.22274	0.483636	0.32837	0.409725			0.290122	1.11225		HSP60	60 kDa heat shock protein, mitochondrial OS=Homo sapiens OX=9606 GN=HSPD1 PE=1 SV=2	0	76.697	35	17	306	17	573	61	5.87	104.47	17	0	2.34945	3.12834	3.07803	2.42474	2.62601	2.6347	2.41635	2.81848	2.90742
P08651	NFIC	1.65003	2.22945	0.00589584	0.026776	+	C33A_C93	0.722492	5.34742	+	NFI	Nuclear factor 1 C-type OS=Homo sapiens OX=9606 GN=NFIC PE=1 SV=2	0	76.66	44	17	248	14	508	55.6	8.38	103.34	17	3	3.3881	3.07635	3.48244	2.70522	2.52382	2.55038	3.70195	3.96268	3.73813
O00567	NOP56	1.54253	3.35356	0.000443037	0.0169362	+	C33A_C93	0.625296	10.6324	+	NOL5A	Nucleolar protein 56 OS=Homo sapiens OX=9606 GN=NOP56 PE=1 SV=4	0	76.634	36	19	280	19	594	66	9.19	117.4	19	0	3.0131	2.8152	2.92283	2.26924	2.31642	2.28957	2.91555	2.52365	2.74023
Q9P2J5	LARS1	1.27187	3.15749	0.000695836	0.0157288	+	C33A_C93	0.346951	9.46226	+	KIAA1352 LARS	Leucine--tRNA ligase, cytoplasmic OS=Homo sapiens OX=9606 GN=LARS1 PE=1 SV=2	0	76.572	18	19	277	19	1176	134.4	7.3	133.82	19	0	3.0735	3.0323	3.14456	2.71995	2.72022	2.76933	3.63856	3.63645	3.55615
P01130	LDLR	0.796956	1.1489	0.0709738	0.109284			-0.327427	-2.44306			Low-density lipoprotein receptor OS=Homo sapiens OX=9606 GN=LDLR PE=1 SV=1	0	76.448	33	18	300	18	860	95.3	5.05	127.52	18	0	2.41497	1.98309	2.32029	2.51155	2.6023	2.58678	2.29509	2.09401	2.1525
P62495	ETF1	1.19083	0.784484	0.164254	0.209372			0.251966	1.70052		ERF1 RF1 SUP45L1	Eukaryotic peptide chain release factor subunit 1 OS=Homo sapiens OX=9606 GN=ETF1 PE=1 SV=3	0	76.437	48	17	247	17	437	49	5.71	107.97	17	0	3.21206	3.29287	3.63527	2.99612	3.24226	3.14592	3.71157	3.99846	3.83324
O95714	HERC2	1.48335	0.552988	0.279906	0.347287			0.568856	1.24858			E3 ubiquitin-protein ligase HERC2 OS=Homo sapiens OX=9606 GN=HERC2 PE=1 SV=2	0	76.387	6	23	163	23	4834	526.9	6.28	43.65	23	0	-0.988383	-1.07605	-1.16725	-1.5058	-0.941654	-2.49079	-0.897004	-0.589152	-0.970429
Q14258	TRIM25	2.05743	3.36692	0.000429619	0.0173043	+	C33A_C93	1.04084	10.7169	+	EFP RNF147 ZNF147	E3 ubiquitin/ISG15 ligase TRIM25 OS=Homo sapiens OX=9606 GN=TRIM25 PE=1 SV=2	0	76.187	30	16	320	16	630	70.9	8.09	118.56	16	0	3.34704	3.28775	3.41669	2.1317	2.41818	2.37908	3.38591	3.27617	3.45724
O94906	PRPF6	1.2605	1.29522	0.0506733	0.0838091			0.333991	2.76339		C20orf14	Pre-mRNA-processing factor 6 OS=Homo sapiens OX=9606 GN=PRPF6 PE=1 SV=1	0	76.045	21	18	365	18	941	106.9	8.25	171.51	18	0	2.60142	2.50752	2.56517	2.31745	1.99016	2.36453	2.47124	1.38895	2.32246
Q8WXH0	SYNE2	0.787028	1.05618	0.0878653	0.128458			-0.345513	-2.24774		KIAA1011 NUA	Nesprin-2 OS=Homo sapiens OX=9606 GN=SYNE2 PE=1 SV=3	0	75.931	5	24	197	24	6885	795.9	5.36	58.64	24	0	0.0774593	0.36029	0.595093	0.662275	0.759583	0.647523	0.593022	1.00983	0.998845
P51532	SMARCA4	1.8542	2.23163	0.00586639	0.0268493	+	C33A_C93	0.890795	5.35488	+	BAF190A BRG1 SNF2B SNF2L4	Transcription activator BRG1 OS=Homo sapiens OX=9606 GN=SMARCA4 PE=1 SV=2	0	75.719	14	20	224	20	1647	184.5	7.88	92.12	20	0	1.02961	0.580346	0.832082	-0.264753	-0.0590379	0.0934492	1.22852	0.670117	1.09231
Q14160	SCRIB	0.860293	0.526902	0.297234	0.369561			-0.217099	-1.19747		CRIB1 KIAA0147 LAP4 SCRB1 VARTUL	Protein scribble homolog OS=Homo sapiens OX=9606 GN=SCRIB PE=1 SV=5	0	75.38	16	19	223	19	1630	174.8	5.07	83.14	19	0	1.33666	1.12547	1.4975	1.35195	1.82473	1.43424	2.09734	2.19328	2.00654
O15031	PLXNB2	0.588325	2.72818	0.0018699	0.0195122	+	C33A_C93	-0.765316	-7.30256	+	KIAA0315	Plexin-B2 OS=Homo sapiens OX=9606 GN=PLXNB2 PE=1 SV=3	0	75.279	13	19	243	19	1838	205	6.24	90.86	19	0	1.72709	1.51608	1.4265	2.23385	2.30826	2.42351	1.66722	0.578751	1.51677
Q9UHI6	DDX20	1.88681	3.72144	0.000189914	0.0105085	+	C33A_C93	0.915952	13.2067	+	DP103 GEMIN3	Probable ATP-dependent RNA helicase DDX20 OS=Homo sapiens OX=9606 GN=DDX20 PE=1 SV=2	0	75.076	25	15	230	15	824	92.2	6.95	87.19	15	0	2.80623	2.63865	2.59119	1.80043	1.71935	1.76845	2.90595	2.631	2.67313
O76021	RSL1D1	0.970161	0.145118	0.715949	0.825554			-0.0437043	-0.390679		CATX11 CSIG PBK1	Ribosomal L1 domain-containing protein 1 OS=Homo sapiens OX=9606 GN=RSL1D1 PE=1 SV=3	0	75.054	35	18	357	18	490	54.9	10.13	158	18	0	3.03601	2.99418	2.81009	3.16042	2.86765	2.94333	2.4666	2.2473	2.58022
Q96I24	FUBP3	1.56673	2.05181	0.00887553	0.0319013	+	C33A_C93	0.64776	4.76454	+	FBP3	Far upstream element-binding protein 3 OS=Homo sapiens OX=9606 GN=FUBP3 PE=1 SV=2	0	75.053	40	17	217	16	572	61.6	8.38	84.2	17	0	2.67066	2.71179	2.97338	2.33242	2.04091	2.03922	2.87532	2.82259	2.76999
Q9UPQ9	TNRC6B	2.0082	1.54318	0.0286302	0.0641748			1.00591	3.34769	+	KIAA1093	Trinucleotide repeat-containing gene 6B protein OS=Homo sapiens OX=9606 GN=TNRC6B PE=1 SV=4	0	74.963	13	17	132	17	1833	193.9	6.76	48.99	17	0	0.823612	0.558638	1.40851	-0.373558	-0.0499912	0.196591	1.75164	2.22395	1.70219
Q8NE71	ABCF1	1.07861	0.529046	0.29577	0.367491			0.109179	1.20167		ABC50	ATP-binding cassette sub-family F member 1 OS=Homo sapiens OX=9606 GN=ABCF1 PE=1 SV=2	0	74.823	27	19	321	18	845	95.9	6.8	146.37	19	0	2.88958	2.89689	2.73945	2.76869	2.84095	2.58875	2.82449	2.56845	2.82822
P30291	WEE1	3.30231	3.67015	0.000213722	0.0151875	+	C33A_C93	1.72347	12.815	+		Wee1-like protein kinase OS=Homo sapiens OX=9606 GN=WEE1 PE=1 SV=2	0	74.6	26	14	257	14	646	71.6	6.77	91.51	14	0	2.83238	2.84177	3.03339	1.13093	1.40224	1.00395	3.46824	3.78779	3.51048
P09543	CNP	0.732394	1.43219	0.0369663	0.0693907			-0.449307	-3.07903			2',3'-cyclic-nucleotide 3'-phosphodiesterase OS=Homo sapiens OX=9606 GN=CNP PE=1 SV=2	0	74.585	46	18	202	18	421	47.5	9.07	76.32	18	0	2.94135	3.02306	2.58239	3.32362	3.19365	3.37746	2.73337	2.14	2.53056
P39019	RPS19	1.41213	2.27072	0.00536145	0.0256504	+	C33A_C93	0.49787	5.4905	+		Small ribosomal subunit protein eS19 OS=Homo sapiens OX=9606 GN=RPS19 PE=1 SV=2	0	74.116	63	14	799	14	145	16.1	10.32	380.88	14	0	6.51981	6.42372	6.34527	6.02811	5.78325	5.98383	6.51369	5.89083	6.16263
Q8WX93	PALLD	1.25822	1.18462	0.0653702	0.103691			0.331383	2.51981		KIAA0992	Palladin OS=Homo sapiens OX=9606 GN=PALLD PE=1 SV=3	0	74.1	12	18	224	18	1383	150.5	7.09	90.71	18	0	0.978231	0.955344	1.21079	0.53336	0.890205	0.726655	1.72912	2.37426	1.7582
A5A3E0	POTEF	0.721266	1.18512	0.0652948	0.103676			-0.471397	-2.52089		A26C1B	POTE ankyrin domain family member F OS=Homo sapiens OX=9606 GN=POTEF PE=1 SV=2	0	73.849	6	6	1634	0	1075	121.4	6.2	806.3	6	0	9.94308	9.7839	9.68506	10.3614	9.94535	10.5195	10.4113	9.18797	9.9604
Q9H6S0	YTHDC2	1.26272	1.44761	0.0356768	0.0693191			0.336537	3.11564			3'-5' RNA helicase YTHDC2 OS=Homo sapiens OX=9606 GN=YTHDC2 PE=1 SV=2	0	73.683	17	20	288	20	1430	160.1	8.4	101.43	20	0	2.09295	1.97164	2.27861	1.65709	1.8509	1.82559	2.13061	1.75316	1.78836
P04843	RPN1	0.572158	3.79858	0.000159008	0.0121569	+	C33A_C93	-0.805513	-13.8175	+		Dolichyl-diphosphooligosaccharide--protein glycosyltransferase subunit 1 OS=Homo sapiens OX=9606 GN=RPN1 PE=1 SV=1	0	73.368	38	17	412	17	607	68.5	6.38	185.35	17	0	3.5234	3.51986	3.49191	4.30723	4.22314	4.42136	3.52257	3.24876	3.58606
P17812	CTPS1	0.822866	1.47895	0.0331934	0.0679901			-0.281271	-3.19072		CTPS	CTP synthase 1 OS=Homo sapiens OX=9606 GN=CTPS1 PE=1 SV=2	0	73.226	29	17	334	15	591	66.6	6.46	154.47	17	2	3.08319	3.29519	3.26868	3.38213	3.54532	3.56342	3.30947	3.17878	3.33722
Q14694	USP10	2.24203	3.94456	0.000113615	0.00778947	+	C33A_C93	1.16481	15.0491	+	KIAA0190	Ubiquitin carboxyl-terminal hydrolase 10 OS=Homo sapiens OX=9606 GN=USP10 PE=1 SV=2	0	73.136	27	14	334	14	798	87.1	5.31	150.23	14	0	3.65892	3.84354	3.86908	2.70473	2.598	2.57441	3.70457	3.69066	3.79007
P46459	NSF	0.886772	1.07375	0.084382	0.125034			-0.173365	-2.28434			Vesicle-fusing ATPase OS=Homo sapiens OX=9606 GN=NSF PE=1 SV=3	0	72.822	25	17	270	17	744	82.5	6.95	111.47	17	0	2.82331	2.83496	3.04434	3.0608	3.12184	3.04007	3.20664	2.68894	3.14456
P61978	HNRNPK	0.980478	0.0744076	0.842544	0.922579			-0.0284427	-0.211901		HNRPK	Heterogeneous nuclear ribonucleoprotein K OS=Homo sapiens OX=9606 GN=HNRNPK PE=1 SV=1	0	72.65	38	16	1265	16	463	50.9	5.54	583.27	16	0	5.96424	5.94731	6.29616	5.95841	6.13886	6.19577	7.02004	7.30562	6.8093
P27797	CALR	0.617827	3.38645	0.00041072	0.0178876	+	C33A_C93	-0.694725	-10.8416	+	CRTC	Calreticulin OS=Homo sapiens OX=9606 GN=CALR PE=1 SV=1	0	72.6	40	13	396	13	417	48.1	4.44	202.24	13	0	3.66545	3.83747	3.8089	4.50732	4.39435	4.49432	3.56593	3.50082	3.76437
Q13283	G3BP1	3.76899	4.79407	1.60666e-05	0.0208	+	C33A_C93	1.91418	24.653	+	G3BP	Ras GTPase-activating protein-binding protein 1 OS=Homo sapiens OX=9606 GN=G3BP1 PE=1 SV=1	0	72.417	52	15	502	14	466	52.1	5.52	196.53	15	1	4.55836	4.76867	4.72009	2.84585	2.69143	2.76731	4.53689	3.92447	4.3021
Q9H089	LSG1	1.5155	2.87257	0.00134102	0.0151732	+	C33A_C93	0.599792	7.97301	+		Large subunit GTPase 1 homolog OS=Homo sapiens OX=9606 GN=LSG1 PE=1 SV=2	0	72.407	30	17	351	17	658	75.2	6.38	141.25	17	0	2.91274	2.79725	2.98499	2.19708	2.33218	2.36634	3.18184	3.64873	3.2777
Q9BZF9	UACA	1.95515	2.72077	0.00190207	0.0193237	+	C33A_C93	0.967279	7.26956	+	KIAA1561	Uveal autoantigen with coiled-coil domains and ankyrin repeats OS=Homo sapiens OX=9606 GN=UACA PE=1 SV=2	0	72.267	17	20	226	20	1416	162.4	7.03	96.91	20	0	1.59832	1.87278	1.83464	0.599392	0.881456	0.923064	1.79697	1.47147	1.78607
Q5T1M5	FKBP15	0.722886	1.06508	0.0860842	0.126819			-0.468159	-2.26624		KIAA0674	FK506-binding protein 15 OS=Homo sapiens OX=9606 GN=FKBP15 PE=1 SV=2	0	72.166	22	16	185	16	1219	133.5	5.2	77.76	16	0	1.12769	1.16178	1.4011	2.07372	1.49853	1.52279	1.17315	1.19683	1.17649
Q16891	IMMT	0.499479	3.2756	0.000530153	0.0163429	+	C33A_C93	-1.0015	-10.1518	+	HMP MIC60 MINOS2	MICOS complex subunit MIC60 OS=Homo sapiens OX=9606 GN=IMMT PE=1 SV=1	0	72.157	25	16	229	16	758	83.6	6.48	96.87	16	0	1.96303	2.11035	2.0662	2.97229	2.94742	3.22439	1.99921	1.63664	1.63796
Q9Y383	LUC7L2	1.37657	1.43821	0.036458	0.0692506			0.461075	3.09328			Putative RNA-binding protein Luc7-like 2 OS=Homo sapiens OX=9606 GN=LUC7L2 PE=1 SV=2	0	72.146	33	14	299	8	392	46.5	10.01	129.42	14	5	2.93557	2.89655	2.9541	2.70721	2.49874	2.19705	2.70949	2.66998	2.57486
O00411	POLRMT	0.750776	1.71344	0.0193448	0.048964	+	C33A_C93	-0.413546	-3.78544			DNA-directed RNA polymerase, mitochondrial OS=Homo sapiens OX=9606 GN=POLRMT PE=1 SV=2	0	72.111	24	17	152	17	1230	138.5	8.98	52.58	17	0	1.32994	1.3369	1.30214	1.51914	1.8496	1.84088	1.22008	1.0923	1.12199
Q86XI2	NCAPG2	2.10136	2.02346	0.00947412	0.0342299	+	C33A_C93	1.07132	4.67625	+	LUZP5	Condensin-2 complex subunit G2 OS=Homo sapiens OX=9606 GN=NCAPG2 PE=1 SV=1	0	71.929	18	19	272	19	1143	130.9	6.87	99.05	19	0	2.33839	2.10804	2.26552	1.27244	0.745212	1.48033	1.70677	1.36834	1.67981
Q06481	APLP2	0.754044	3.02283	0.000948792	0.0151367	+	C33A_C93	-0.40728	-8.72925	+	APPL2	Amyloid beta precursor like protein 2 OS=Homo sapiens OX=9606 GN=APLP2 PE=1 SV=2	0	71.744	27	17	392	17	763	86.9	4.79	213.38	17	0	3.97324	3.89518	3.99134	4.42422	4.35829	4.29908	4.32309	4.55836	4.32625
P67809	YBX1	1.84615	3.11904	0.000760252	0.0149677	+	C33A_C93	0.884518	9.24737	+	NSEP1 YB1	Y-box-binding protein 1 OS=Homo sapiens OX=9606 GN=YBX1 PE=1 SV=3	0	71.713	47	12	249	8	324	35.9	9.88	124.81	12	3	4.63483	4.47908	4.64735	3.8326	3.71488	3.56023	4.77872	4.53147	4.58777
P61247	RPS3A	1.31011	0.764851	0.17185	0.219543			0.38969	1.66199		FTE1 MFTL	Small ribosomal subunit protein eS1 OS=Homo sapiens OX=9606 GN=RPS3A PE=1 SV=2	0	71.691	44	14	444	14	264	29.9	9.73	206.82	14	0	4.22081	3.98113	3.9284	4.08679	3.43905	3.43543	4.10999	3.6602	3.94161
Q9HAW4	CLSPN	1.75742	2.44153	0.00361804	0.0229178	+	C33A_C93	0.813456	6.11644	+		Claspin OS=Homo sapiens OX=9606 GN=CLSPN PE=1 SV=3	0	71.646	15	18	205	18	1339	151	4.82	88.3	18	0	2.45001	2.23948	2.56084	1.44905	1.58791	1.77302	3.10345	3.58585	3.07268
P46939	UTRN	1.25758	1.3946	0.0403087	0.0729176			0.330649	2.99074		DMDL DRP1	Utrophin OS=Homo sapiens OX=9606 GN=UTRN PE=1 SV=2	0	71.627	8	21	94	21	3433	394.2	5.33	24.14	21	0	-0.328238	-0.216612	-0.0380586	-0.43584	-0.665888	-0.473129	-0.674273	-0.616591	-1.0957
Q15393	SF3B3	0.996199	0.0171625	0.961253	0.980568			-0.00549483	-0.051692		KIAA0017 SAP130	Splicing factor 3B subunit 3 OS=Homo sapiens OX=9606 GN=SF3B3 PE=1 SV=4	0	71.598	18	20	323	20	1217	135.5	5.26	136.03	20	0	2.89697	3.22593	2.93818	3.07005	3.02153	2.98599	2.93445	2.0455	2.53147
P48444	ARCN1	1.02723	0.266899	0.54088	0.669326			0.0387563	0.667691		COPD	Coatomer subunit delta OS=Homo sapiens OX=9606 GN=ARCN1 PE=1 SV=1	0	71.597	33	16	409	16	511	57.2	6.21	205.15	16	0	3.19565	3.27861	3.32347	3.20449	3.16421	3.31276	3.3611	3.44778	3.3736
P00338	LDHA	1.07795	0.255838	0.554833	0.683199			0.108296	0.643677			L-lactate dehydrogenase A chain OS=Homo sapiens OX=9606 GN=LDHA PE=1 SV=2	0	71.246	43	15	366	14	332	36.7	8.27	192.74	15	0	3.21141	3.59715	3.58669	3.1415	3.4212	3.50766	3.22032	3.56711	3.40079
P25205	MCM3	1.16169	2.5641	0.00272837	0.0221935	+	C33A_C93	0.216223	6.60149			DNA replication licensing factor MCM3 OS=Homo sapiens OX=9606 GN=MCM3 PE=1 SV=3	0	71.227	29	19	279	19	808	90.9	5.77	117.92	19	0	2.03075	2.093	2.06405	1.84008	1.89662	1.80243	1.96313	1.82587	1.97895
P51116	FXR2	2.07997	2.95174	0.00111754	0.0140637	+	C33A_C93	1.05656	8.3637	+	FMR1L2	RNA-binding protein FXR2 OS=Homo sapiens OX=9606 GN=FXR2 PE=1 SV=2	0	71.198	29	15	374	14	673	74.2	6.23	147.8	15	0	2.78976	2.5642	2.9553	1.63565	1.68248	1.82144	2.43371	2.31017	2.52071
Q14444	CAPRIN1	2.91394	3.77468	0.000168005	0.0114815	+	C33A_C93	1.54297	13.6254	+	GPIAP1 GPIP137 M11S1 RNG105	Caprin-1 OS=Homo sapiens OX=9606 GN=CAPRIN1 PE=1 SV=2	0	71.137	24	15	498	15	709	78.3	5.25	224.73	15	0	4.48082	4.58815	4.58352	2.82614	2.9986	3.19884	4.32011	3.9335	4.23108
Q02543	RPL18A	1.00301	0.0118554	0.973071	0.988085			0.00434192	0.0359147			Large ribosomal subunit protein eL20 OS=Homo sapiens OX=9606 GN=RPL18A PE=1 SV=2	0	71.137	47	14	519	14	176	20.7	10.71	273.13	14	0	5.82047	5.64799	5.52081	5.75045	5.49074	5.73504	5.75831	5.21451	5.50718
O14980	XPO1	0.749407	2.19794	0.00633957	0.0280858	+	C33A_C93	-0.416178	-5.24016	+	CRM1	Exportin-1 OS=Homo sapiens OX=9606 GN=XPO1 PE=1 SV=1	0	70.857	19	15	264	15	1071	123.3	6.06	91.19	15	0	2.17975	2.20639	2.27129	2.49096	2.74032	2.67468	2.02691	1.85397	2.00738
O14617	AP3D1	0.984444	0.0707065	0.849755	0.927667			-0.0226194	-0.202027			AP-3 complex subunit delta-1 OS=Homo sapiens OX=9606 GN=AP3D1 PE=1 SV=1	0	70.806	20	16	233	16	1153	130.1	8.48	86.24	16	0	2.59616	2.64772	2.71902	2.59467	2.88754	2.54855	2.74832	2.95788	2.79515
Q9P258	RCC2	7.07747	3.82115	0.000150956	0.0131915	+	C33A_C93	2.82323	14.0013	+	KIAA1470 TD60	Protein RCC2 OS=Homo sapiens OX=9606 GN=RCC2 PE=1 SV=2	0	70.695	38	15	258	15	522	56	8.78	106.38	15	0	3.86498	4.09638	3.97316	0.779616	1.39664	1.28856	3.79205	3.23373	3.69448
Q96GQ7	DDX27	0.916965	0.566764	0.271166	0.337758			-0.125062	-1.27552		cPERP-F RHLP	Probable ATP-dependent RNA helicase DDX27 OS=Homo sapiens OX=9606 GN=DDX27 PE=1 SV=2	0	70.584	23	18	333	18	796	89.8	9.28	156.26	18	0	3.18715	2.92812	3.06826	3.29759	3.07832	3.1828	3.19809	2.71107	2.91719
P26373	RPL13	1.15463	0.82874	0.148341	0.190678			0.207431	1.78774		BBC1	Large ribosomal subunit protein eL13 OS=Homo sapiens OX=9606 GN=RPL13 PE=1 SV=4	0	70.52	45	14	972	14	211	24.2	11.65	529.14	14	0	7.21494	6.94822	7.01111	6.89468	6.68903	6.96828	7.3218	6.42417	6.92807
Q03169	TNFAIP2	1.32239	1.77551	0.0167685	0.0445249	+	C33A_C93	0.403147	3.95352			Tumor necrosis factor alpha-induced protein 2 OS=Homo sapiens OX=9606 GN=TNFAIP2 PE=1 SV=2	0	70.406	30	17	328	17	654	72.6	6.46	131.87	17	0	2.79033	2.69716	2.5566	2.13461	2.30662	2.39341	2.80268	2.43153	2.74558
P46087	NOP2	0.908415	0.454271	0.351341	0.441665			-0.138577	-1.05399		NOL1 NSUN1	Probable 28S rRNA (cytosine(4447)-C(5))-methyltransferase OS=Homo sapiens OX=9606 GN=NOP2 PE=1 SV=2	0	70.327	26	18	287	18	812	89.2	9.23	126.13	18	0	2.76115	2.49405	2.31319	2.69906	2.6454	2.63967	2.48427	1.83246	2.17191
Q96RQ3	MCCC1	0.663397	3.83557	0.000146025	0.0111111	+	C33A_C93	-0.592055	-14.12	+	MCCA	Methylcrotonoyl-CoA carboxylase subunit alpha, mitochondrial OS=Homo sapiens OX=9606 GN=MCCC1 PE=1 SV=3	0	70.304	28	14	290	14	725	80.4	7.78	125.17	14	0	2.85537	2.89941	2.75973	3.41585	3.44188	3.43295	2.81171	2.88666	2.85925
Q6P1N0	CC2D1A	1.11473	0.554143	0.279163	0.346811			0.156697	1.25084		AKI1	Coiled-coil and C2 domain-containing protein 1A OS=Homo sapiens OX=9606 GN=CC2D1A PE=1 SV=1	0	69.679	24	17	316	17	951	104	8.09	149.91	17	0	2.63865	2.53144	2.92586	2.45669	2.57865	2.59053	2.12049	1.94679	1.99074
Q7L576	CYFIP1	1.10315	0.998363	0.100378	0.142748			0.141629	2.12849		KIAA0068	Cytoplasmic FMR1-interacting protein 1 OS=Homo sapiens OX=9606 GN=CYFIP1 PE=1 SV=1	0	69.546	15	17	222	11	1253	145.1	6.9	93.47	17	4	1.91545	1.97041	2.00554	1.82499	1.92666	1.71486	1.60519	1.2838	1.38812
P30153	PPP2R1A	0.940306	0.161083	0.690107	0.804146			-0.0887975	-0.428867			Serine/threonine-protein phosphatase 2A 65 kDa regulatory subunit A alpha isoform OS=Homo sapiens OX=9606 GN=PPP2R1A PE=1 SV=4	0	69.482	29	14	254	10	589	65.3	5.11	89.62	14	3	3.19054	3.3568	2.77532	3.06476	3.10112	3.42317	2.74153	2.19019	2.95276
P42345	MTOR	0.860473	0.893623	0.127755	0.166929			-0.216799	-1.91671		FRAP FRAP1 FRAP2 RAFT1 RAPT1	Serine/threonine-protein kinase mTOR OS=Homo sapiens OX=9606 GN=MTOR PE=1 SV=1	0	69.33	10	18	204	18	2549	288.7	7.17	63.81	18	0	0.548351	0.757427	0.635965	0.990664	0.676908	0.924567	0.13171	0.200401	0.432521
P08779	KRT16	9.052	1.56952	0.0269451	0.0619675			3.17824	3.41332	+	KRT16A	Keratin, type I cytoskeletal 16 OS=Homo sapiens OX=9606 GN=KRT16 PE=1 SV=4	0	69.077	30	16	333	4	473	51.2	5.05	154.29	16	0	-0.285139	-1.0381	-0.306645	-2.07616	-3.92226	-5.16617	-3.12996	-0.192425	-1.13268
Q96SN8	CDK5RAP2	0.971992	0.0227211	0.949028	0.980904			-0.0409831	-0.0680286		CEP215 KIAA1633	CDK5 regulatory subunit-associated protein 2 OS=Homo sapiens OX=9606 GN=CDK5RAP2 PE=1 SV=5	0	69.031	12	20	94	18	1893	214.9	5.58	31.26	20	2	0.266914	0.182313	-1.25109	0.200351	0.034272	-0.913535	1.48386	1.83681	0.635164
P22102	GART	0.908796	0.466758	0.341383	0.426318			-0.137972	-1.07881		PGFT PRGS	Trifunctional purine biosynthetic protein adenosine-3 OS=Homo sapiens OX=9606 GN=GART PE=1 SV=1	0	68.933	23	18	314	18	1010	107.7	6.7	141.6	18	0	2.55365	2.74823	2.31893	2.70899	2.61648	2.70925	2.7962	2.55881	2.35731
Q99832	CCT7	1.26427	2.52317	0.00299798	0.0227376	+	C33A_C93	0.3383	6.43602	+	CCTH NIP7-1	T-complex protein 1 subunit eta OS=Homo sapiens OX=9606 GN=CCT7 PE=1 SV=2	0	68.507	37	16	274	16	543	59.3	7.65	117.84	16	0	2.83141	2.8797	2.88248	2.62269	2.50004	2.45596	2.62048	2.43657	2.65524
P26599	PTBP1	1.72606	1.97196	0.010667	0.0351984	+	C33A_C93	0.787486	4.51893	+	PTB	Polypyrimidine tract-binding protein 1 OS=Homo sapiens OX=9606 GN=PTBP1 PE=1 SV=2	0	68.369	33	12	401	11	557	59.6	9.16	175.34	12	1	5.04059	5.01465	4.91949	4.07806	4.5412	3.99302	4.04574	3.46936	3.97811
Q96F86	EDC3	1.07665	0.370244	0.42634	0.536978			0.106549	0.884605		LSM16 YJDC YJEFN2	Enhancer of mRNA-decapping protein 3 OS=Homo sapiens OX=9606 GN=EDC3 PE=1 SV=1	0	68.331	44	16	243	16	508	56	7.11	107.91	16	0	3.47813	3.24517	3.29329	3.21162	3.41023	3.0751	1.49871	1.10946	1.26586
P33991	MCM4	0.838348	0.879263	0.13205	0.173781			-0.25438	-1.88804		CDC21	DNA replication licensing factor MCM4 OS=Homo sapiens OX=9606 GN=MCM4 PE=1 SV=5	0	68.043	23	14	236	14	863	96.5	6.74	91.55	14	0	1.0853	1.3112	1.51189	1.52856	1.66256	1.4804	1.77192	1.88162	1.89656
P35998	PSMC2	0.992444	0.0476532	0.89608	0.952532			-0.0109422	-0.139118		MSS1	26S proteasome regulatory subunit 7 OS=Homo sapiens OX=9606 GN=PSMC2 PE=1 SV=3	0	67.901	37	16	227	16	433	48.6	5.95	95.11	16	0	2.3171	2.51145	2.53059	2.39885	2.45882	2.5343	2.65977	2.38613	2.62365
A0A2R8Y4L2	HNRNPA1L3	1.77683	3.73294	0.000184953	0.0106897	+	C33A_C93	0.829309	13.296	+	HNRNPA1P48	Heterogeneous nuclear ribonucleoprotein A1-like 3 OS=Homo sapiens OX=9606 GN=HNRNPA1L3 PE=4 SV=2	0	67.646	49	13	273	12	320	34.3	9	116.22	13	0	3.35795	3.50741	3.49432	2.65729	2.67036	2.54411	3.58034	3.02445	3.26931
P41091	EIF2S3	1.27387	1.42203	0.0378419	0.0704322			0.349223	3.05503		EIF2G	Eukaryotic translation initiation factor 2 subunit 3 OS=Homo sapiens OX=9606 GN=EIF2S3 PE=1 SV=3	0	67.516	34	14	320	14	472	51.1	8.4	155.22	14	0	4.23819	4.33363	4.45266	4.18406	3.88811	3.90465	4.39426	3.72661	4.11865
Q2VIR3	EIF2S3B	1.27387	1.42203	0.0378419	0.0703513			0.349223	3.05503			Eukaryotic translation initiation factor 2 subunit 3B OS=Homo sapiens OX=9606 GN=EIF2S3B PE=2 SV=2	0	67.516	34	14	320	14	472	51.2	8.4	155.22	14	0	4.23819	4.33363	4.45266	4.18406	3.88811	3.90465	4.39426	3.72661	4.11865
P15170	GSPT1	1.09159	1.64319	0.0227411	0.0520755			0.126436	3.60084		ERF3A	Eukaryotic peptide chain release factor GTP-binding subunit ERF3A OS=Homo sapiens OX=9606 GN=GSPT1 PE=1 SV=1	0	67.508	39	16	245	16	499	55.7	5.62	99.57	16	0	2.65753	2.76351	2.67351	2.56654	2.55401	2.59469	2.97434	2.69796	2.80441
P12956	XRCC6	0.639904	3.22733	0.000592471	0.0153214	+	C33A_C93	-0.644073	-9.8645	+	G22P1	X-ray repair cross-complementing protein 6 OS=Homo sapiens OX=9606 GN=XRCC6 PE=1 SV=2	0	67.499	31	17	313	17	609	69.8	6.64	118.84	17	0	2.88435	2.83688	2.97722	3.63621	3.46182	3.53264	3.01469	2.66738	2.90568
P05067	APP	0.66159	2.41099	0.0038816	0.0229281	+	C33A_C93	-0.595992	-6.0004	+	A4 AD1	Amyloid-beta precursor protein OS=Homo sapiens OX=9606 GN=APP PE=1 SV=3	0	67.486	19	13	419	13	770	86.9	4.82	174.88	13	0	3.87494	3.91149	3.6082	4.43747	4.34463	4.40051	4.05368	3.98926	3.98171
Q12873	CHD3	1.75525	1.18757	0.0649278	0.103613			0.81168	2.52618			Chromodomain-helicase-DNA-binding protein 3 OS=Homo sapiens OX=9606 GN=CHD3 PE=1 SV=3	0	67.339	13	16	152	12	2000	226.5	7.3	42.84	16	2	0.612637	-0.130332	-0.146548	-0.646659	-0.380632	-1.07199	-0.249805	0.305298	-0.025713
Q15025	TNIP1	1.04841	0.384879	0.412213	0.520326			0.068205	0.914459		KIAA0113 NAF1	TNFAIP3-interacting protein 1 OS=Homo sapiens OX=9606 GN=TNIP1 PE=1 SV=2	0	67.337	30	15	264	15	636	71.8	6.62	108.55	15	0	2.29354	2.19681	2.37787	2.22181	2.31299	2.12881	2.97226	3.02285	2.73204
O00468	AGRN	0.97475	0.0688942	0.853308	0.928546			-0.0368962	-0.19717		AGRIN	Agrin OS=Homo sapiens OX=9606 GN=AGRN PE=1 SV=6	0	67.308	14	16	189	16	2068	217.2	6.39	60.33	16	0	0.73868	0.54537	0.464804	0.715751	0.851792	0.291999	0.732052	0.116975	0.325738
P06744	GPI	0.802807	2.2673	0.00540377	0.0258575	+	C33A_C93	-0.316875	-5.47855			Glucose-6-phosphate isomerase OS=Homo sapiens OX=9606 GN=GPI PE=1 SV=4	0	67.197	31	12	239	12	558	63.1	8.32	90.9	12	0	4.1193	4.08996	3.94958	4.41076	4.3728	4.3259	4.19352	3.53336	4.00337
Q8IZH2	XRN1	2.45949	4.60201	2.50031e-05	0.02	+	C33A_C93	1.29836	22.0576	+	SEP1	5'-3' exoribonuclease 1 OS=Homo sapiens OX=9606 GN=XRN1 PE=1 SV=1	0	67.077	11	18	182	18	1706	194	7.21	69.56	18	0	1.09509	1.11133	1.25948	-0.0890806	-0.168297	-0.171803	0.490816	1.04037	0.691091
P47756	CAPZB	2.15031	2.52148	0.00300965	0.022566	+	C33A_C93	1.10455	6.42927	+		F-actin-capping protein subunit beta OS=Homo sapiens OX=9606 GN=CAPZB PE=1 SV=5	0	66.998	51	13	300	13	272	30.6	6	117.03	13	0	3.46308	3.68451	3.43841	2.30952	2.72704	2.23581	3.05219	2.95858	3.40638
P28340	POLD1	1.02717	0.0567095	0.877588	0.942266			0.0386736	0.164131		POLD	DNA polymerase delta catalytic subunit OS=Homo sapiens OX=9606 GN=POLD1 PE=1 SV=2	0	66.945	19	16	200	16	1107	123.6	7.03	73.24	16	0	-0.0222664	0.119347	-0.285445	-0.20879	-0.38798	0.292385	1.14189	0.592464	0.874067
P43490	NAMPT	1.23839	2.00116	0.00997323	0.0348851	+	C33A_C93	0.308463	4.60766		PBEF PBEF1	Nicotinamide phosphoribosyltransferase OS=Homo sapiens OX=9606 GN=NAMPT PE=1 SV=1	0	66.896	41	16	323	16	491	55.5	7.15	154.26	16	0	4.0063	4.13317	4.01399	3.63713	3.7902	3.80074	4.23032	3.90878	4.1864
P60174	TPI1	0.868199	0.360118	0.436398	0.551714			-0.203903	-0.863842		TPI	Triosephosphate isomerase OS=Homo sapiens OX=9606 GN=TPI1 PE=1 SV=4	0	66.791	71	13	249	13	249	26.7	6.9	101.39	13	0	2.85673	3.34158	2.63361	3.23487	2.92986	3.2789	2.99444	2.51636	2.91214
Q9UP95	SLC12A4	0.632838	2.67891	0.00209454	0.0199821	+	C33A_C93	-0.660091	-7.08551	+	KCC1	Solute carrier family 12 member 4 OS=Homo sapiens OX=9606 GN=SLC12A4 PE=1 SV=2	0	66.748	16	16	247	16	1085	120.6	6.44	97.18	16	0	1.53778	1.41151	1.32286	1.94859	2.12765	2.1762	1.75894	1.53659	1.56059
Q96J02	ITCH	1.00665	0.0264016	0.941019	0.974399			0.00956885	0.0787429			E3 ubiquitin-protein ligase Itchy homolog OS=Homo sapiens OX=9606 GN=ITCH PE=1 SV=2	0	66.587	23	15	320	12	903	102.7	6.3	151.06	15	0	2.54922	2.40854	2.22326	2.31604	2.29941	2.53687	2.47552	1.52915	2.23703
O43175	PHGDH	0.78567	1.29307	0.050925	0.0840515			-0.348005	-2.75856		PGDH3	D-3-phosphoglycerate dehydrogenase OS=Homo sapiens OX=9606 GN=PHGDH PE=1 SV=4	0	66.416	29	12	418	12	533	56.6	6.71	195.91	12	0	4.4969	4.62049	4.27268	4.82801	4.67478	4.93129	4.59034	4.2842	4.50756
Q6P2E9	EDC4	0.262914	2.14769	0.00711719	0.0278404	+	C33A_C93	-1.92734	-5.07265	+	HEDLS	Enhancer of mRNA-decapping protein 4 OS=Homo sapiens OX=9606 GN=EDC4 PE=1 SV=1	0	66.223	16	15	207	15	1401	151.6	5.86	82.06	15	0	0.705637	0.208246	1.50022	2.81141	2.63157	2.75314	0.131722	1.07076	1.25501
P53396	ACLY	0.797626	0.9508	0.111995	0.152531			-0.326216	-2.0317			ATP-citrate synthase OS=Homo sapiens OX=9606 GN=ACLY PE=1 SV=3	0	66.128	20	18	169	18	1101	120.8	7.33	73.8	18	0	1.09638	1.61486	1.23627	1.56278	1.65569	1.70769	1.33675	1.13785	1.29055
P30622	CLIP1	0.726254	1.17923	0.066186	0.103935			-0.461453	-2.50818		CYLN1 RSN	CAP-Gly domain-containing linker protein 1 OS=Homo sapiens OX=9606 GN=CLIP1 PE=1 SV=2	0	66.031	13	17	150	17	1438	162.1	5.36	67.88	17	0	1.4111	1.11024	1.03916	1.93675	1.49154	1.51658	1.48866	2.03184	1.50542
P17987	TCP1	1.05506	0.629636	0.23462	0.291778			0.0773287	1.39813		CCT1 CCTA	T-complex protein 1 subunit alpha OS=Homo sapiens OX=9606 GN=TCP1 PE=1 SV=1	0	65.987	39	15	268	15	556	60.3	6.11	119.83	15	0	3.3525	3.29908	3.27261	3.32137	3.14854	3.22229	3.31312	2.86573	3.2256
P55060	CSE1L	0.845059	0.572515	0.267599	0.33406			-0.242877	-1.28675		CAS XPO2	Exportin-2 OS=Homo sapiens OX=9606 GN=CSE1L PE=1 SV=3	0	65.881	23	18	209	18	971	110.3	5.77	99.63	18	0	1.40977	1.85141	1.90965	1.77063	2.12266	2.00617	1.80983	1.79106	1.98561
Q14974	KPNB1	0.896729	0.733662	0.184645	0.234301			-0.157257	-1.60094		NTF97	Importin subunit beta-1 OS=Homo sapiens OX=9606 GN=KPNB1 PE=1 SV=2	0	65.863	18	14	311	14	876	97.1	4.78	143.12	14	0	2.91276	2.97352	2.84479	2.88659	3.173	3.14325	2.78445	2.40292	2.84088
O95163	ELP1	1.31072	0.903102	0.124997	0.164176			0.390362	1.93568		IKAP IKBKAP	Elongator complex protein 1 OS=Homo sapiens OX=9606 GN=ELP1 PE=1 SV=3	0	65.787	14	17	343	17	1332	150.2	5.94	143.08	17	0	1.77144	2.20691	2.20176	1.48489	1.57788	1.94626	1.86461	1.46825	1.99997
Q96EV2	RBM33	3.02006	3.49473	0.000320091	0.0158947	+	C33A_C93	1.59458	11.5579	+	PRR8	RNA-binding protein 33 OS=Homo sapiens OX=9606 GN=RBM33 PE=1 SV=3	0	65.473	16	13	220	13	1170	129.9	6.93	96.61	13	0	1.99654	2.09168	2.36538	0.55006	0.417058	0.702743	2.6145	2.81074	2.4822
Q99650	OSMR	0.786071	1.4206	0.0379668	0.0706071			-0.347268	-3.05165		OSMRB	Oncostatin-M-specific receptor subunit beta OS=Homo sapiens OX=9606 GN=OSMR PE=1 SV=1	0	65.326	21	13	188	13	979	110.4	5.82	83.85	13	0	2.39861	2.24574	2.03344	2.57925	2.64223	2.49812	2.24749	1.45981	2.05568
P35221	CTNNA1	1.01509	0.067569	0.855916	0.93021			0.0216082	0.19361			Catenin alpha-1 OS=Homo sapiens OX=9606 GN=CTNNA1 PE=1 SV=1	0	65.298	22	14	187	12	906	100	6.29	70.85	14	1	1.42189	1.64256	1.53367	1.41243	1.6942	1.42668	1.82268	1.88671	1.78901
Q96EY1	DNAJA3	1.37275	1.52424	0.0299059	0.0660078			0.457066	3.30098		HCA57 TID1	DnaJ homolog subfamily A member 3, mitochondrial OS=Homo sapiens OX=9606 GN=DNAJA3 PE=1 SV=2	0	65.281	25	12	236	12	480	52.5	9.26	94.6	12	0	2.33221	2.56415	2.56347	1.84679	2.2417	2.00013	2.35629	2.22447	2.45214
O75976	CPD	0.786086	1.42775	0.0373465	0.0693688			-0.34724	-3.06853			Carboxypeptidase D OS=Homo sapiens OX=9606 GN=CPD PE=1 SV=2	0	65.238	14	16	319	16	1380	152.8	6.05	133.51	16	0	2.58211	2.44596	2.32088	2.71326	2.71182	2.96559	2.52806	1.97257	2.26223
Q8N4C8	MINK1	1.37636	1.36517	0.043135	0.0766203			0.460857	2.92251		B55 MAP4K6 MINK YSK2 ZC3	Misshapen-like kinase 1 OS=Homo sapiens OX=9606 GN=MINK1 PE=1 SV=2	0	65.157	14	17	201	10	1332	149.7	7.85	80.64	17	5	1.4304	1.26966	1.48773	1.19535	0.699995	0.90988	1.26346	1.25628	1.45167
Q9H3U1	UNC45A	0.827157	1.16416	0.0685239	0.106391			-0.273768	-2.47573		SMAP1	Protein unc-45 homolog A OS=Homo sapiens OX=9606 GN=UNC45A PE=1 SV=1	0	65.125	21	16	321	16	944	103	6.07	146.27	16	0	2.60127	2.35549	2.29925	2.67285	2.80518	2.59929	2.41716	2.06758	2.23254
O60231	DHX16	1.95593	2.67807	0.00209861	0.0198929	+	C33A_C93	0.967855	7.08186	+	DBP2 DDX16 KIAA0577 PRP2	Pre-mRNA-splicing factor ATP-dependent RNA helicase DHX16 OS=Homo sapiens OX=9606 GN=DHX16 PE=1 SV=2	0	65.095	20	16	201	16	1041	119.2	6.8	71.7	16	0	0.988899	1.33492	1.26971	0.351674	0.274604	0.0636844	1.43066	1.49908	1.34928
O94986	CEP152	2.2798	2.08512	0.00822021	0.031612	+	C33A_C93	1.18891	4.86991	+	KIAA0912	Centrosomal protein of 152 kDa OS=Homo sapiens OX=9606 GN=CEP152 PE=1 SV=4	0	64.948	13	18	89	18	1710	195.5	5.6	24.58	18	0	-1.13226	-0.599316	-0.36978	-2.04592	-1.89712	-1.72504	0.62392	1.3932	0.150549
P20042	EIF2S2	1.1075	0.912071	0.122441	0.162626			0.147301	1.95366		EIF2B	Eukaryotic translation initiation factor 2 subunit 2 OS=Homo sapiens OX=9606 GN=EIF2S2 PE=1 SV=2	0	64.94	45	14	274	14	333	38.4	5.8	131.12	14	0	4.04921	4.077	4.18495	3.96364	4.06177	3.84384	4.24707	3.61097	3.94856
Q8IWZ3	ANKHD1	1.02046	0.0473845	0.896635	0.952882			0.0292132	0.13837		KIAA1085 MASK VBARP	Ankyrin repeat and KH domain-containing protein 1 OS=Homo sapiens OX=9606 GN=ANKHD1 PE=1 SV=1	0	64.934	9	17	295	9	2542	269.3	5.73	118.15	17	4	2.30796	2.10327	1.79883	2.29648	1.77491	2.05104	1.93855	1.03425	1.51179
Q96QK1	VPS35	1.0656	0.148275	0.710764	0.820553			0.0916619	0.398286		MEM3	Vacuolar protein sorting-associated protein 35 OS=Homo sapiens OX=9606 GN=VPS35 PE=1 SV=2	0	64.91	24	16	200	16	796	91.6	5.49	94.37	16	0	1.14252	1.08253	1.2732	0.635473	1.22401	1.36378	0.835028	0.77168	1.09256
P38646	HSPA9	1.33077	1.67177	0.0212925	0.0510226			0.412261	3.67525		GRP75 HSPA9B mt-HSP70	Stress-70 protein, mitochondrial OS=Homo sapiens OX=9606 GN=HSPA9 PE=1 SV=2	0	64.871	25	16	310	16	679	73.6	6.16	162.65	16	0	4.04329	3.98381	4.25636	3.63501	3.58117	3.83049	3.22749	3.21044	3.20314
P05141	SLC25A5	1.3296	3.21255	0.000612989	0.0150526	+	C33A_C93	0.410989	9.77804	+	AAC2 ANT2	ADP/ATP translocase 2 OS=Homo sapiens OX=9606 GN=SLC25A5 PE=1 SV=7	0	64.865	47	15	651	6	298	32.8	9.69	348.24	15	7	7.17448	7.12908	7.13688	6.65697	6.78211	6.76839	7.27638	6.86618	7.04678
Q14145	KEAP1	0.801553	1.73803	0.0182799	0.0473891	+	C33A_C93	-0.319129	-3.85146		INRF2 KIAA0132 KLHL19	Kelch-like ECH-associated protein 1 OS=Homo sapiens OX=9606 GN=KEAP1 PE=1 SV=2	0	64.713	29	15	248	15	624	69.6	6.44	125.85	15	0	2.61217	2.52752	2.3755	2.90552	2.74811	2.81895	2.66072	1.92575	2.50018
Q9UJS0	SLC25A13	1.59634	2.48624	0.00326409	0.0238696	+	C33A_C93	0.674769	6.28974	+		Electrogenic aspartate/glutamate antiporter SLC25A13, mitochondrial OS=Homo sapiens OX=9606 GN=SLC25A13 PE=1 SV=2	0	64.679	28	16	237	11	675	74.1	8.62	117.99	16	5	2.33413	2.38982	2.36577	1.51644	1.88197	1.667	2.5063	2.33049	2.42415
Q8NC51	SERBP1	1.63401	1.96526	0.0108327	0.0354797	+	C33A_C93	0.708418	4.49877	+	PAIRBP1	SERPINE1 mRNA-binding protein 1 OS=Homo sapiens OX=9606 GN=SERBP1 PE=1 SV=2	0	64.647	35	15	325	15	408	44.9	8.65	144.1	15	0	3.46553	3.37941	3.37155	2.99457	2.47555	2.62112	3.17601	2.83446	2.98071
P04899	GNAI2	1.02022	0.0883983	0.815834	0.905982			0.028876	0.248709		GNAI2B	Guanine nucleotide-binding protein G(i) subunit alpha-2 OS=Homo sapiens OX=9606 GN=GNAI2 PE=1 SV=3	0	64.494	41	12	272	10	355	40.4	5.54	114.64	12	2	3.37863	3.44951	3.16918	3.14359	3.38387	3.38323	3.29515	2.5951	3.07564
P48634	PRRC2A	1.85015	2.72556	0.00188124	0.0194175	+	C33A_C93	0.887646	7.29085	+	BAT2 G2	Protein PRRC2A OS=Homo sapiens OX=9606 GN=PRRC2A PE=1 SV=3	0	64.383	11	16	172	16	2157	228.7	9.45	53.31	16	0	1.62844	1.62705	1.98491	0.824769	0.843803	0.908894	1.11101	1.2605	1.16493
Q15233	NONO	1.42474	2.1323	0.00737395	0.0293464	+	C33A_C93	0.5107	5.02219	+	NRB54	Non-POU domain-containing octamer-binding protein OS=Homo sapiens OX=9606 GN=NONO PE=1 SV=4	0	64.254	26	12	290	11	471	54.2	8.95	135.11	12	0	3.83684	4.01224	3.76029	3.4053	3.22313	3.44884	3.64327	3.27113	3.4152
P21127	CDK11B	0.998106	0.0179537	0.959503	0.979934			-0.00273514	-0.054029		CDC2L1 CDK11 PITSLREA PK58	Cyclin-dependent kinase 11B OS=Homo sapiens OX=9606 GN=CDK11B PE=1 SV=4	0	64.158	19	17	384	2	795	92.6	5.54	165.1	17	11	2.68357	2.64936	2.69678	2.6822	2.76202	2.5937	3.01979	2.9576	2.88835
Q86VP6	CAND1	0.662313	1.63162	0.0233549	0.0527644			-0.594415	-3.57099	+	KIAA0829 TIP120 TIP120A	Cullin-associated NEDD8-dissociated protein 1 OS=Homo sapiens OX=9606 GN=CAND1 PE=1 SV=2	0	64.112	17	16	252	16	1230	136.3	5.78	90.28	16	0	1.21998	0.918954	0.664112	1.44324	1.5569	1.58614	1.45263	1.14795	0.724456
Q9BUQ8	DDX23	0.845845	0.425655	0.375271	0.472176			-0.241535	-0.996814			Probable ATP-dependent RNA helicase DDX23 OS=Homo sapiens OX=9606 GN=DDX23 PE=1 SV=3	0	64.107	21	15	320	15	820	95.5	9.55	127.39	15	0	5.06417	4.64757	5.33419	4.99936	5.30335	5.46781	5.3969	4.94974	5.45053
Q8NDV7	TNRC6A	2.40852	2.46864	0.00339907	0.0234448	+	C33A_C93	1.26815	6.22104	+	CAGH26 KIAA1460 TNRC6	Trinucleotide repeat-containing gene 6A protein OS=Homo sapiens OX=9606 GN=TNRC6A PE=1 SV=2	0	64.084	12	15	140	14	1962	210.2	7.01	55.98	15	1	0.51149	0.455243	0.88838	-0.911397	-0.652596	-0.385331	1.69999	2.16432	1.3937
P62136	PPP1CA	0.959083	0.116779	0.764225	0.864389			-0.0602718	-0.321082		PPP1A	Serine/threonine-protein phosphatase PP1-alpha catalytic subunit OS=Homo sapiens OX=9606 GN=PPP1CA PE=1 SV=1	0	64.061	50	12	307	3	330	37.5	6.33	117.81	12	8	2.79894	2.52478	2.7636	2.48596	2.72151	3.06067	2.94103	2.92586	2.81575
Q6ZW31	SYDE1	0.866563	0.721472	0.189901	0.239215			-0.206624	-1.57712			Rho GTPase-activating protein SYDE1 OS=Homo sapiens OX=9606 GN=SYDE1 PE=1 SV=1	0	63.741	29	16	205	16	735	79.7	8.43	66.69	16	0	1.23809	0.961997	1.23445	1.34507	1.19224	1.5171	1.26469	1.37821	1.13655
Q8IY17	PNPLA6	0.947523	1.24631	0.0567141	0.0934008			-0.0777676	-2.65451		NTE	Patatin-like phospholipase domain-containing protein 6 OS=Homo sapiens OX=9606 GN=PNPLA6 PE=1 SV=3	0	63.733	18	19	274	19	1375	150.9	7.74	114.4	19	0	2.45636	2.40565	2.36912	2.45864	2.50446	2.50134	2.03471	2.31795	2.24784
Q14137	BOP1	1.28635	0.991685	0.101933	0.143922			0.363287	2.11484		KIAA0124	Ribosome biogenesis protein BOP1 OS=Homo sapiens OX=9606 GN=BOP1 PE=1 SV=2	0	63.589	27	13	243	13	746	83.6	6.19	97.51	13	0	2.68826	2.50883	2.37835	1.98716	2.45274	2.04568	2.26572	1.87739	1.97116
Q9UG63	ABCF2	1.63065	1.56796	0.0270422	0.0620514			0.705449	3.40941	+		ATP-binding cassette sub-family F member 2 OS=Homo sapiens OX=9606 GN=ABCF2 PE=1 SV=2	0	63.582	28	16	317	16	623	71.2	7.37	153.58	16	0	3.19583	3.0843	3.09272	2.60406	2.01182	2.64062	3.22306	2.56541	3.1147
Q9NW13	RBM28	1.0548	0.30825	0.491756	0.611024			0.0769726	0.755949			RNA-binding protein 28 OS=Homo sapiens OX=9606 GN=RBM28 PE=1 SV=3	0	63.556	23	16	258	16	759	85.7	9.22	99.12	16	0	1.69065	1.5326	1.82346	1.68767	1.49473	1.63341	1.65885	1.39714	1.88478
Q13637	RAB32	0.958625	0.241416	0.573567	0.702071			-0.0609619	-0.61208			Ras-related protein Rab-32 OS=Homo sapiens OX=9606 GN=RAB32 PE=1 SV=3	0	63.493	73	14	438	12	225	25	6.54	219.18	14	1	3.47248	3.46583	3.51521	3.39243	3.51486	3.72911	3.46216	3.56757	3.57471
Q96PU5	NEDD4L	1.07164	0.357781	0.438752	0.554584			0.099816	0.859039		KIAA0439 NEDL3	E3 ubiquitin-protein ligase NEDD4-like OS=Homo sapiens OX=9606 GN=NEDD4L PE=1 SV=2	0	63.287	20	17	312	13	975	111.9	5.82	144.93	17	3	2.14235	1.95855	1.89251	1.7943	1.82462	2.07505	2.36394	1.51314	2.23958
P55795	HNRNPH2	2.67324	1.49093	0.0322901	0.0669788			1.41859	3.21969	+	FTP3 HNRPH2	Heterogeneous nuclear ribonucleoprotein H2 OS=Homo sapiens OX=9606 GN=HNRNPH2 PE=1 SV=1	0	63.224	32	11	744	5	449	49.2	6.3	389.4	11	0	0.0472946	-0.0304334	0.617225	-1.83864	-0.493632	-1.28941	0.463991	1.41137	0.566509
P05388	RPLP0	1.26943	1.55594	0.0278011	0.0630806			0.344177	3.37939			Large ribosomal subunit protein uL10 OS=Homo sapiens OX=9606 GN=RPLP0 PE=1 SV=1	0	63.207	45	11	673	11	317	34.3	5.97	295.29	11	0	6.42484	6.19475	6.21015	5.96658	5.79828	6.03235	6.33329	5.736	6.21527
P14649	MYL6B	0.692765	1.30539	0.0495008	0.0833682			-0.529563	-2.78626		MLC1SA	Myosin light chain 6B OS=Homo sapiens OX=9606 GN=MYL6B PE=1 SV=1	0	63.152	63	10	820	7	208	22.8	5.73	443.48	10	0	1.81855	1.38147	1.18366	1.948	1.97404	2.05033	1.41895	0.399999	1.20445
Q9Y3I0	RTCB	0.654654	2.95216	0.00111645	0.0141538	+	C33A_C93	-0.611196	-8.36582	+	C22orf28	RNA-splicing ligase RtcB homolog OS=Homo sapiens OX=9606 GN=RTCB PE=1 SV=1	0	63.125	36	15	304	15	505	55.2	7.23	130.03	15	0	3.04612	3.04661	3.23401	3.675	3.79509	3.69024	3.60286	3.55567	3.508
Q86UE4	MTDH	2.50563	4.21664	6.07236e-05	0.0104762	+	C33A_C93	1.32517	17.6354	+	AEG1 LYRIC	Protein LYRIC OS=Homo sapiens OX=9606 GN=MTDH PE=1 SV=2	0	63.078	38	15	179	15	582	63.8	9.32	68.4	15	0	1.95357	2.00396	2.16035	0.79195	0.702959	0.647453	1.9192	1.73875	1.96988
P62753	RPS6	1.29791	1.83054	0.0147728	0.0403007	+	C33A_C93	0.376185	4.10662			Small ribosomal subunit protein eS6 OS=Homo sapiens OX=9606 GN=RPS6 PE=1 SV=1	0	63.029	42	13	656	13	249	28.7	10.84	359.04	13	0	6.35799	6.15167	6.30367	6.01195	5.77754	5.89529	6.48884	5.7923	6.23546
Q13823	GNL2	1.26153	2.14645	0.00713755	0.0279701	+	C33A_C93	0.335169	5.06857		NGP1	Nucleolar GTP-binding protein 2 OS=Homo sapiens OX=9606 GN=GNL2 PE=1 SV=1	0	62.193	19	14	208	14	731	83.6	9.25	79.22	14	0	2.71809	2.56129	2.65408	2.33334	2.21687	2.37774	2.5294	2.03915	2.53591
O75420	GIGYF1	1.76164	1.56553	0.027194	0.0627297			0.816915	3.40332	+	CDS2 PERQ1	GRB10-interacting GYF protein 1 OS=Homo sapiens OX=9606 GN=GIGYF1 PE=1 SV=2	0	61.946	17	13	248	13	1035	114.5	5.39	110.19	13	0	1.14668	1.01359	1.78677	0.462693	0.485157	0.548443	2.52303	4.48077	3.9188
Q9P265	DIP2B	0.676527	2.06866	0.00853776	0.031746	+	C33A_C93	-0.563781	-4.81763	+	KIAA1463	Disco-interacting protein 2 homolog B OS=Homo sapiens OX=9606 GN=DIP2B PE=1 SV=3	0	61.919	14	17	232	15	1576	171.4	8.09	84.69	17	2	1.09393	1.28234	1.10697	1.59097	1.66309	1.92053	1.24929	0.916864	1.27659
P38935	IGHMBP2	1.1765	0.632116	0.233283	0.290386			0.234501	1.40296		SMBP2 SMUBP2	DNA-binding protein SMUBP-2 OS=Homo sapiens OX=9606 GN=IGHMBP2 PE=1 SV=3	0	61.904	23	15	186	15	993	109.1	8.97	58.48	15	0	0.666223	0.892787	0.853417	0.448184	0.389338	0.871404	0.802979	-1.38963	0.463384
Q86TB9	PATL1	1.39923	1.68091	0.0208492	0.050411			0.484633	3.69925	+		Protein PAT1 homolog 1 OS=Homo sapiens OX=9606 GN=PATL1 PE=1 SV=2	0	61.837	19	13	266	13	770	86.8	6.67	123.62	13	0	2.57838	2.54263	2.91416	2.25497	2.08148	2.24482	3.4539	3.93247	3.36991
Q9UJM3	ERRFI1	44.9908	3.02012	0.000954738	0.0150286	+	C33A_C93	5.49156	8.71504	+	MIG6	ERBB receptor feedback inhibitor 1 OS=Homo sapiens OX=9606 GN=ERRFI1 PE=1 SV=1	0	61.821	32	12	179	12	462	50.5	8.1	42.88	12	0	1.67926	1.47313	1.16211	-2.95563	-4.13368	-5.07087	2.58931	2.93269	1.90573
P55072	VCP	0.887376	0.300234	0.500918	0.623867			-0.172383	-0.739011		HEL-220 HEL-S-70	Transitional endoplasmic reticulum ATPase OS=Homo sapiens OX=9606 GN=VCP PE=1 SV=4	0	61.433	29	16	189	16	806	89.3	5.26	68.24	16	0	1.3806	2.05203	2.06765	2.07738	2.04447	1.89558	1.75623	2.35709	1.69767
P08195	SLC3A2	0.786488	1.07825	0.0835126	0.124518			-0.346504	-2.29374		MDU1	Amino acid transporter heavy chain SLC3A2 OS=Homo sapiens OX=9606 GN=SLC3A2 PE=1 SV=3	0	61.252	24	14	328	14	630	68	5.01	154.17	14	0	4.21028	3.88047	3.75838	4.38009	4.16187	4.34667	3.68396	3.38427	3.55219
P30050	RPL12	1.29858	1.58978	0.025717	0.0562047			0.37693	3.46429			Large ribosomal subunit protein uL11 OS=Homo sapiens OX=9606 GN=RPL12 PE=1 SV=1	0	60.971	70	9	717	9	165	17.8	9.42	341.37	9	0	7.4701	7.2276	7.23693	7.0293	6.7877	6.98683	7.45292	6.52985	7.19082
Q9Y450	HBS1L	1.40569	1.46032	0.0346485	0.0688755			0.491282	3.14596		HBS1 KIAA1038	HBS1-like protein OS=Homo sapiens OX=9606 GN=HBS1L PE=1 SV=1	0	60.964	29	14	307	14	684	75.4	6.61	135.21	14	0	2.43725	2.59155	2.90544	2.08385	2.30054	2.076	2.98903	3.49368	3.157
Q6P996	PDXDC1	0.815459	1.06758	0.0855888	0.126018			-0.294317	-2.27147		KIAA0251	Pyridoxal-dependent decarboxylase domain-containing protein 1 OS=Homo sapiens OX=9606 GN=PDXDC1 PE=1 SV=2	0	60.806	22	15	172	15	788	86.7	5.38	59.24	15	0	1.2278	1.30047	1.15241	1.59505	1.68627	1.28231	1.1219	0.711975	1.24617
Q27J81	INF2	0.757289	0.375847	0.420875	0.529113			-0.401085	-0.896054		C14orf151 C14orf173	Inverted formin-2 OS=Homo sapiens OX=9606 GN=INF2 PE=1 SV=2	0	60.8	17	14	126	14	1249	135.5	5.38	54.8	14	0	-0.822018	-0.828224	-1.52344	-0.191965	-0.363449	-1.41502	-1.5291	-1.3894	-1.3193
P46060	RANGAP1	1.1567	0.470307	0.338604	0.422561			0.210019	1.08585		KIAA1835 SD	Ran GTPase-activating protein 1 OS=Homo sapiens OX=9606 GN=RANGAP1 PE=1 SV=1	0	60.795	29	14	208	14	587	63.5	4.68	77.04	14	0	1.62299	1.82152	1.79542	1.65095	1.78077	1.17816	2.25572	2.30222	2.19236
O94973	AP2A2	1.12623	0.413741	0.385708	0.488823			0.171502	0.972868		ADTAB CLAPA2 HIP9 HYPJ KIAA0899	AP-2 complex subunit alpha-2 OS=Homo sapiens OX=9606 GN=AP2A2 PE=1 SV=2	0	60.629	21	12	322	6	939	103.9	6.96	170.9	12	0	1.03199	0.903253	0.817511	0.534493	1.07096	0.632793	-0.112572	-1.032	-0.499521
P38919	EIF4A3	1.11476	0.866973	0.13584	0.1786			0.156733	1.86356		DDX48 KIAA0111	Eukaryotic initiation factor 4A-III OS=Homo sapiens OX=9606 GN=EIF4A3 PE=1 SV=4	0	60.51	29	13	271	12	411	46.8	6.73	136.36	13	1	2.10264	2.20887	2.32356	2.13111	1.94859	2.08516	1.88703	1.7587	1.79864
P26639	TARS1	1.08105	0.337528	0.459697	0.574577			0.112438	0.81719		TARS	Threonine--tRNA ligase 1, cytoplasmic OS=Homo sapiens OX=9606 GN=TARS1 PE=1 SV=3	0	60.321	27	15	268	15	723	83.4	6.67	121.38	15	0	2.49677	2.93352	2.71595	2.69229	2.50243	2.6142	2.51542	2.17983	2.62949
Q53EZ4	CEP55	3.5635	2.94418	0.00113717	0.0156478	+	C33A_C93	1.8333	8.32564	+	C10orf3 URCC6	Centrosomal protein of 55 kDa OS=Homo sapiens OX=9606 GN=CEP55 PE=1 SV=3	0	60.268	32	13	151	13	464	54.1	7.01	61.12	13	0	1.58312	1.12915	1.34801	-0.677524	-0.635249	-0.126841	1.23811	0.655194	1.22419
Q9Y4P3	TBL2	2.58038	4.18343	6.55494e-05	0.00916667	+	C33A_C93	1.36758	17.2978	+	WBSCR13	Transducin beta-like protein 2 OS=Homo sapiens OX=9606 GN=TBL2 PE=1 SV=1	0	60.052	31	15	247	15	447	49.8	9.44	104.59	15	0	2.03	2.18034	2.17002	0.808667	0.833801	0.635158	2.31506	1.6712	2.04938
Q8TDM6	DLG5	1.53025	2.36268	0.00433831	0.0224512	+	C33A_C93	0.613767	5.82057	+	KIAA0583 PDLG	Disks large homolog 5 OS=Homo sapiens OX=9606 GN=DLG5 PE=1 SV=4	0	59.969	12	19	98	19	1919	213.7	7.42	31.88	19	0	0.216742	0.257023	0.264492	-0.206952	-0.563469	-0.332622	0.295587	-0.013925	0.337379
Q9Y4X5	ARIH1	0.933236	0.218388	0.604801	0.73239			-0.0996859	-0.560895		ARI MOP6 UBCH7BP	E3 ubiquitin-protein ligase ARIH1 OS=Homo sapiens OX=9606 GN=ARIH1 PE=1 SV=2	0	59.772	23	13	252	13	557	64.1	5.08	127.22	13	0	2.76935	3.11325	3.31656	3.03027	3.16749	3.30046	3.92886	4.43541	4.1458
P08243	ASNS	1.30632	1.43858	0.0364267	0.0693192			0.385514	3.09416		TS11	Asparagine synthetase [glutamine-hydrolyzing] OS=Homo sapiens OX=9606 GN=ASNS PE=1 SV=4	0	59.728	30	15	238	15	561	64.3	6.86	106.85	15	0	2.3147	2.55305	2.40004	1.91461	1.95431	2.24233	2.52352	2.28667	2.52907
Q92945	KHSRP	0.889029	0.495308	0.319663	0.398596			-0.169698	-1.1353		FUBP2	Far upstream element-binding protein 2 OS=Homo sapiens OX=9606 GN=KHSRP PE=1 SV=4	0	59.698	28	14	193	14	711	73.1	7.3	74.19	14	0	1.43834	1.32442	1.70928	1.49131	1.66426	1.82556	2.09457	2.63636	2.0105
Q9Y224	RTRAF	0.714879	1.30177	0.0499144	0.083479			-0.484229	-2.77812		C14orf166	RNA transcription, translation and transport factor protein OS=Homo sapiens OX=9606 GN=RTRAF PE=1 SV=1	0	59.666	51	14	229	14	244	28.1	6.65	112.68	14	0	2.77364	2.47168	2.89235	3.01998	3.42892	3.14146	2.69337	2.73864	2.57228
O95905	ECD	1.15594	0.516263	0.304605	0.379001			0.20906	1.17657			Protein ecdysoneless homolog OS=Homo sapiens OX=9606 GN=ECD PE=1 SV=1	0	59.635	25	13	187	13	644	72.7	4.87	67.97	13	0	1.8273	1.99399	1.61283	1.33637	1.66343	1.80714	1.35218	0.744384	1.15544
Q6DD88	ATL3	1.00296	0.00555084	0.9873	0.992952			0.00425859	0.0169343			Atlastin-3 OS=Homo sapiens OX=9606 GN=ATL3 PE=1 SV=1	0	59.593	31	13	117	13	541	60.5	5.66	45.17	13	0	1.60853	1.35649	1.34075	1.00056	1.81411	1.47832	0.718708	1.01582	1.24413
P62913	RPL11	1.23584	1.0329	0.0927051	0.133399			0.305497	2.19949			Large ribosomal subunit protein uL5 OS=Homo sapiens OX=9606 GN=RPL11 PE=1 SV=2	0	59.527	57	11	380	11	178	20.2	9.6	174.2	11	0	5.92296	5.59631	5.55591	5.50573	5.2449	5.40807	5.72643	4.97568	5.54558
P08237	PFKM	0.744384	2.17506	0.00668245	0.0286178	+	C33A_C93	-0.425881	-5.16337	+	PFKX	ATP-dependent 6-phosphofructokinase, muscle type OS=Homo sapiens OX=9606 GN=PFKM PE=1 SV=2	0	59.519	18	14	294	12	780	85.1	7.99	134.22	14	0	1.13567	1.31053	1.40961	1.67437	1.74204	1.71704	1.58547	1.34447	1.45318
P27824	CANX	0.608125	2.51821	0.00303242	0.0224812	+	C33A_C93	-0.717559	-6.4162	+		Calnexin OS=Homo sapiens OX=9606 GN=CANX PE=1 SV=2	0	59.506	25	14	248	14	592	67.5	4.6	118.87	14	0	3.23844	3.40845	3.04683	4.02114	3.94205	3.8832	3.24201	3.01434	3.1874
Q99715	COL12A1	0.945692	0.0996318	0.795002	0.888895			-0.0805573	-0.277704		COL12A1L	Collagen alpha-1(XII) chain OS=Homo sapiens OX=9606 GN=COL12A1 PE=1 SV=2	0	59.46	6	16	137	16	3063	332.9	5.53	53.46	16	0	3.79148	3.49469	4.21868	3.53171	4.20496	4.00985	4.6228	5.4083	4.90059
Q9NTJ5	SACM1L	0.720349	2.49227	0.00321906	0.0230691	+	C33A_C93	-0.473233	-6.31344	+	KIAA0851 SAC1	Phosphatidylinositol-3-phosphatase SAC1 OS=Homo sapiens OX=9606 GN=SACM1L PE=1 SV=2	0	59.441	28	15	233	15	587	66.9	7.12	98.8	15	0	2.02091	2.00547	2.18284	2.44505	2.58852	2.59533	2.13188	2.08858	2.23423
Q13428	TCOF1	1.16528	0.637121	0.23061	0.287731			0.220682	1.41271			Treacle protein OS=Homo sapiens OX=9606 GN=TCOF1 PE=1 SV=3	0	59.336	14	15	137	15	1488	152	9.04	45.74	15	0	2.24929	2.17049	2.10681	2.22119	1.69957	1.94379	1.9507	1.64939	1.61717
Q9UPT8	ZC3H4	1.57911	1.52958	0.0295406	0.066034			0.659112	3.31411	+	C19orf7 KIAA1064	Zinc finger CCCH domain-containing protein 4 OS=Homo sapiens OX=9606 GN=ZC3H4 PE=1 SV=3	0	59.292	16	12	198	12	1303	140.2	6.27	99.97	12	0	2.19734	1.92589	2.39202	1.79955	1.32324	1.41512	2.60038	2.74554	2.23041
Q9UHD2	TBK1	0.908236	0.441265	0.362022	0.453944			-0.138861	-1.02806		NAK	Serine/threonine-protein kinase TBK1 OS=Homo sapiens OX=9606 GN=TBK1 PE=1 SV=1	0	59.265	26	14	270	14	729	83.6	6.79	123.7	14	0	2.24715	2.42973	2.38373	2.24817	2.58321	2.64581	3.07074	3.13243	2.61973
Q07020	RPL18	1.17766	0.817058	0.152385	0.195647			0.235924	1.76467			Large ribosomal subunit protein eL18 OS=Homo sapiens OX=9606 GN=RPL18 PE=1 SV=2	0	59.232	45	10	978	10	188	21.6	11.72	463.87	10	0	7.27967	7.0155	7.15988	6.81857	6.79394	7.13477	7.50001	6.61628	7.25586
Q04721	NOTCH2	0.847468	1.17292	0.0671548	0.104873			-0.238769	-2.49458			Neurogenic locus notch homolog protein 2 OS=Homo sapiens OX=9606 GN=NOTCH2 PE=1 SV=3	0	59.145	10	15	166	13	2471	265.2	5.14	55.09	15	1	1.07114	1.00138	1.21415	1.19728	1.44327	1.36242	1.46483	1.06373	1.26634
Q9UDY2	TJP2	1.47475	1.08971	0.0813379	0.121179			0.560467	2.31774		X104 ZO2	Tight junction protein ZO-2 OS=Homo sapiens OX=9606 GN=TJP2 PE=1 SV=2	0	58.992	17	16	150	16	1190	133.9	7.4	58.38	16	0	-0.209026	0.0238113	0.303753	-0.239466	-0.885479	-0.437917	0.419633	0.476701	0.22597
P04844	RPN2	0.718497	1.74499	0.017989	0.0466084	+	C33A_C93	-0.476946	-3.87029	+		Dolichyl-diphosphooligosaccharide--protein glycosyltransferase subunit 2 OS=Homo sapiens OX=9606 GN=RPN2 PE=1 SV=3	0	58.879	29	12	299	12	631	69.2	5.69	125.87	12	0	3.2798	3.31411	3.03241	3.53644	3.68808	3.83264	3.22135	2.9917	2.99614
P08708	RPS17	1.61095	2.08505	0.00822148	0.0315392	+	C33A_C93	0.687911	4.8697	+	RPS17L	Small ribosomal subunit protein eS17 OS=Homo sapiens OX=9606 GN=RPS17 PE=1 SV=2	0	58.762	59	11	319	11	135	15.5	9.85	151.69	11	0	2.68549	2.65508	2.6968	2.24293	1.75636	1.97435	2.00686	2.42876	2.39062
Q14257	RCN2	1.19102	0.891941	0.12825	0.16769			0.252202	1.91335		ERC55	Reticulocalbin-2 OS=Homo sapiens OX=9606 GN=RCN2 PE=1 SV=1	0	58.71	43	10	263	10	317	36.9	4.4	109.42	10	0	4.46077	4.2982	4.47606	3.99871	4.08812	4.39159	4.94063	5.26729	4.7295
Q13425	SNTB2	0.977818	0.0240529	0.946122	0.979052			-0.0323618	-0.0719149		D16S2531E SNT2B2 SNTL	Beta-2-syntrophin OS=Homo sapiens OX=9606 GN=SNTB2 PE=1 SV=1	0	58.683	33	13	170	13	540	57.9	8.82	53.75	13	0	0.944704	0.297183	-0.117053	1.0327	-0.0721128	0.26133	-0.0759651	-0.311502	-0.279882
Q2NL82	TSR1	1.10328	0.637331	0.230499	0.287869			0.141799	1.41311		KIAA1401	Pre-rRNA-processing protein TSR1 homolog OS=Homo sapiens OX=9606 GN=TSR1 PE=1 SV=1	0	58.632	21	14	269	14	804	91.8	7.42	126.56	14	0	3.03488	2.98394	2.82932	2.92953	2.83375	2.65946	2.78579	2.53385	3.10246
O76031	CLPX	1.06798	0.160775	0.690597	0.804099			0.0948843	0.428137			ATP-dependent Clp protease ATP-binding subunit clpX-like, mitochondrial OS=Homo sapiens OX=9606 GN=CLPX PE=1 SV=2	0	58.627	25	14	224	14	633	69.2	7.58	77.73	14	0	1.99167	2.12987	1.58909	1.69213	1.62561	2.10823	1.56437	1.50168	1.58549
Q9NUQ8	ABCF3	1.18517	0.423649	0.377008	0.47565			0.245094	0.992789			ATP-binding cassette sub-family F member 3 OS=Homo sapiens OX=9606 GN=ABCF3 PE=1 SV=2	0	58.602	24	13	206	13	709	79.7	6.34	79.98	13	0	1.20316	1.14855	1.3978	1.18732	0.538388	1.28852	1.7007	1.72603	1.60888
Q92888	ARHGEF1	1.19272	1.0704	0.0850345	0.125537			0.254257	2.27735			Rho guanine nucleotide exchange factor 1 OS=Homo sapiens OX=9606 GN=ARHGEF1 PE=1 SV=2	0	58.502	17	15	170	15	912	102.4	5.66	62.06	15	0	0.233154	0.311249	0.203051	0.20073	-0.158019	-0.0580289	0.188523	0.320543	-0.459761
Q9ULH0	KIDINS220	0.510213	2.89027	0.00128745	0.0150983	+	C33A_C93	-0.970827	-8.05891	+	ARMS KIAA1250	Kinase D-interacting substrate of 220 kDa OS=Homo sapiens OX=9606 GN=KIDINS220 PE=1 SV=3	0	58.498	11	16	144	16	1771	196.4	6.62	51.52	16	0	0.890688	0.60071	0.523063	1.61013	1.58619	1.73062	0.397805	-0.174291	0.648633
Q8TEX9	IPO4	1.00762	0.0886884	0.815289	0.906254			0.0109537	0.249464		IMP4B RANBP4	Importin-4 OS=Homo sapiens OX=9606 GN=IPO4 PE=1 SV=2	0	58.471	17	14	192	14	1081	118.6	4.96	79.98	14	0	2.92844	3.01852	2.99669	2.90502	2.9833	3.02246	2.96498	2.28022	2.8765
Q12774	ARHGEF5	0.92104	0.313903	0.485397	0.604591			-0.118665	-0.767847		TIM	Rho guanine nucleotide exchange factor 5 OS=Homo sapiens OX=9606 GN=ARHGEF5 PE=1 SV=3	0	58.446	12	16	125	14	1597	176.7	5.53	36.73	16	1	0.562351	0.280535	0.78374	0.70837	0.557439	0.716811	1.07791	0.859415	0.789461
P27635	RPL10	1.31052	1.21676	0.060707	0.0994141			0.390139	2.58964		DXS648E QM	Large ribosomal subunit protein uL16 OS=Homo sapiens OX=9606 GN=RPL10 PE=1 SV=5	0	58.428	44	13	571	8	214	24.6	10.08	334.85	13	4	5.97449	5.66639	5.59136	5.51924	5.19147	5.35112	5.93719	5.1598	5.61642
Q2TAY7	SMU1	1.45134	1.4683	0.0340173	0.0688166			0.537382	3.1651			WD40 repeat-containing protein SMU1 OS=Homo sapiens OX=9606 GN=SMU1 PE=1 SV=2	0	58.411	29	10	161	10	513	57.5	7.18	56.52	10	0	1.4457	1.84354	1.91202	1.35916	1.17155	1.0584	1.60692	1.99307	1.96422
P08758	ANXA5	0.568681	2.40656	0.00392137	0.0225595	+	C33A_C93	-0.814309	-5.98373	+	ANX5 ENX2 PP4	Annexin A5 OS=Homo sapiens OX=9606 GN=ANXA5 PE=1 SV=2	0	58.406	42	13	197	13	320	35.9	5.05	99.72	13	0	0.615305	0.889462	1.03896	1.56503	1.75886	1.66276	0.643893	0.902033	1.03214
Q12905	ILF2	1.20305	1.20564	0.0622815	0.101032			0.266699	2.56539		NF45	Interleukin enhancer-binding factor 2 OS=Homo sapiens OX=9606 GN=ILF2 PE=1 SV=2	0	58.4	43	13	335	13	390	43	5.26	150.24	13	0	3.00061	3.15623	3.31162	2.99403	2.83083	2.8435	3.55693	3.23771	3.29423
P27348	YWHAQ	0.882452	1.09803	0.0797934	0.120077			-0.18041	-2.33523			14-3-3 protein theta OS=Homo sapiens OX=9606 GN=YWHAQ PE=1 SV=1	0	58.39	61	12	230	9	245	27.7	4.78	109.7	12	1	2.68915	2.87559	2.84626	2.89197	2.9915	3.06876	3.0691	2.91373	3.02221
P62249	RPS16	1.36703	2.39381	0.00403818	0.0224984	+	C33A_C93	0.451049	5.93594	+		Small ribosomal subunit protein uS9 OS=Homo sapiens OX=9606 GN=RPS16 PE=1 SV=2	0	58.341	54	11	607	11	146	16.4	10.21	349.69	11	0	6.11522	6.08891	6.07846	5.70946	5.49309	5.72689	6.26682	5.77657	6.01274
P14868	DARS1	1.18247	0.831284	0.147474	0.18965			0.241805	1.79277		DARS	Aspartate--tRNA ligase, cytoplasmic OS=Homo sapiens OX=9606 GN=DARS1 PE=1 SV=2	0	58.261	34	15	286	15	501	57.1	6.55	133.67	15	0	2.94463	2.63328	2.77484	2.7433	2.43774	2.44629	3.32811	3.18813	3.17232
P05387	RPLP2	1.1631	0.871518	0.134426	0.177616			0.217969	1.8726		D11S2243E RPP2	Large ribosomal subunit protein P2 OS=Homo sapiens OX=9606 GN=RPLP2 PE=1 SV=1	0	58.255	53	9	404	9	115	11.7	4.54	174.01	9	0	5.93475	5.69355	5.79321	5.4406	5.56658	5.76043	5.79945	5.43464	5.66439
Q8N684	CPSF7	1.36965	1.76487	0.0171842	0.0449392	+	C33A_C93	0.453805	3.92437	+		Cleavage and polyadenylation specificity factor subunit 7 OS=Homo sapiens OX=9606 GN=CPSF7 PE=1 SV=1	0	58.163	33	12	300	12	471	52	8	138.98	12	0	3.13657	2.99839	3.32634	2.76033	2.77114	2.56842	3.02711	3.00938	2.88053
Q14008	CKAP5	2.92335	2.70854	0.00195643	0.0194366	+	C33A_C93	1.54762	7.21533	+	KIAA0097	Cytoskeleton-associated protein 5 OS=Homo sapiens OX=9606 GN=CKAP5 PE=1 SV=3	0	58.093	9	16	142	16	2032	225.4	7.8	45.33	16	0	1.05098	1.44511	1.35974	-0.415414	-0.464114	0.0924958	1.07211	1.09006	1.24662
Q5SRE5	NUP188	1.01335	0.0358827	0.920698	0.965609			0.0191311	0.105983		KIAA0169	Nucleoporin NUP188 OS=Homo sapiens OX=9606 GN=NUP188 PE=1 SV=1	0	57.822	11	15	164	15	1749	195.9	6.73	60.21	15	0	-0.301031	0.196662	0.225268	-0.021972	-0.0509244	0.136402	0.365502	0.19827	0.208693
P53999	SUB1	0.934371	0.266696	0.541132	0.669418			-0.0979328	-0.667252		PC4 RPO2TC1	Activated RNA polymerase II transcriptional coactivator p15 OS=Homo sapiens OX=9606 GN=SUB1 PE=1 SV=3	0	57.768	64	11	438	11	127	14.4	9.6	195.95	11	0	4.82306	4.48139	4.50867	4.87674	4.53926	4.69091	4.79539	3.99751	4.60496
P63244	RACK1	1.48523	1.22075	0.0601522	0.0992491			0.570684	2.59836		GNB2L1	Small ribosomal subunit protein RACK1 OS=Homo sapiens OX=9606 GN=RACK1 PE=1 SV=3	0	57.726	46	12	358	12	317	35.1	7.69	174.02	12	0	3.81095	4.20395	4.02048	3.14826	3.38327	3.7918	3.50403	3.81502	3.81115
Q6KC79	NIPBL	2.17497	2.08707	0.00818333	0.0317587	+	C33A_C93	1.121	4.87614	+	IDN3 SCC2	Nipped-B-like protein OS=Homo sapiens OX=9606 GN=NIPBL PE=1 SV=2	0	57.697	6	16	179	16	2804	315.9	7.91	61.95	16	0	1.11328	0.909758	1.12961	-0.507605	0.148373	0.148894	0.80146	0.432462	0.942361
O95819	MAP4K4	0.996092	0.00703426	0.983933	0.991459			-0.00564973	-0.0214241		HGK KIAA0687 NIK	Mitogen-activated protein kinase kinase kinase kinase 4 OS=Homo sapiens OX=9606 GN=MAP4K4 PE=1 SV=2	0	57.655	15	16	153	9	1239	142	7.46	61.08	16	0	-5.05761	-5.36767	-5.8501	-5.60797	-5.47521	-5.17525	-5.68283	-5.75363	-5.68987
P15924	DSP	1.32413	0.617655	0.241182	0.297442			0.40504	1.37479			Desmoplakin OS=Homo sapiens OX=9606 GN=DSP PE=1 SV=3	0	57.553	7	17	80	17	2871	331.6	6.81	23.29	17	0	-0.134817	0.218661	0.527077	-0.270374	0.216675	-0.550499	0.423719	0.773652	0.355726
P53675	CLTCL1	0.84264	0.672941	0.212353	0.267109			-0.247012	-1.48247		CLH22 CLTCL CLTD	Clathrin heavy chain 2 OS=Homo sapiens OX=9606 GN=CLTCL1 PE=1 SV=2	0	57.551	8	13	192	13	1640	186.9	5.85	94.05	13	0	2.9142	2.78348	2.70955	2.73842	3.20714	3.20272	2.46552	1.55058	2.89639
A3KMH1	VWA8	1.03267	0.14803	0.711164	0.820536			0.04638	0.397697		KIAA0564	von Willebrand factor A domain-containing protein 8 OS=Homo sapiens OX=9606 GN=VWA8 PE=1 SV=2	0	57.445	12	17	176	17	1905	214.7	7.4	54.63	17	0	0.91877	0.925038	0.667226	0.803617	0.922142	0.646135	0.356117	0.222133	0.672344
P62263	RPS14	1.35254	2.13084	0.00739881	0.0291317	+	C33A_C93	0.435667	5.01742	+		Small ribosomal subunit protein uS11 OS=Homo sapiens OX=9606 GN=RPS14 PE=1 SV=3	0	57.436	41	8	451	8	151	16.3	10.05	199.53	8	0	5.92292	5.83017	5.78406	5.53133	5.26826	5.43055	6.18296	5.51468	5.86025
P42224	STAT1	0.772057	1.61564	0.0242306	0.0534746			-0.37322	-3.53			Signal transducer and activator of transcription 1-alpha/beta OS=Homo sapiens OX=9606 GN=STAT1 PE=1 SV=2	0	57.323	23	14	280	14	750	87.3	6.05	146.44	14	0	2.05621	2.30141	2.17762	2.46536	2.70844	2.4811	1.76029	1.84174	2.05396
P62081	RPS7	1.86645	3.50778	0.000310615	0.0161067	+	C33A_C93	0.900294	11.6472	+		Small ribosomal subunit protein eS7 OS=Homo sapiens OX=9606 GN=RPS7 PE=1 SV=1	0	57.322	55	10	663	10	194	22.1	10.1	334.92	10	0	5.96539	5.84789	5.71885	5.0037	4.90913	4.91842	5.55431	5.14046	5.48689
P04792	HSPB1	0.956828	0.660895	0.218326	0.273672			-0.0636683	-1.45901		HSP27 HSP28	Heat shock protein beta-1 OS=Homo sapiens OX=9606 GN=HSPB1 PE=1 SV=2	0	57.221	48	10	378	10	205	22.8	6.4	191.05	10	0	4.53062	4.47303	4.44222	4.61372	4.52648	4.49667	4.51876	4.11581	4.41693
Q8IWR0	ZC3H7A	3.06364	1.68615	0.020599	0.0497948	+	C33A_C93	1.61525	3.71306	+	ZC3H7 ZC3HDC7	Zinc finger CCCH domain-containing protein 7A OS=Homo sapiens OX=9606 GN=ZC3H7A PE=1 SV=1	0	57.206	21	16	143	15	971	110.5	7.3	54.54	16	0	0.649103	0.670403	0.759167	-1.77997	-0.380908	-0.606191	0.375967	0.204689	0.491833
P43246	MSH2	0.975505	0.198997	0.632416	0.76289			-0.0357789	-0.517019			DNA mismatch repair protein Msh2 OS=Homo sapiens OX=9606 GN=MSH2 PE=1 SV=1	0	57.019	17	14	201	14	934	104.7	5.77	94.42	14	0	1.94723	1.83092	1.92191	1.98226	1.81767	2.00747	2.08061	1.74548	1.89637
Q13616	CUL1	1.25283	1.35408	0.044251	0.0789056			0.325194	2.897			Cullin-1 OS=Homo sapiens OX=9606 GN=CUL1 PE=1 SV=2	0	57.004	23	15	143	15	776	89.6	8	54.72	15	0	1.69901	1.42966	1.61198	1.09644	1.34104	1.3276	1.66735	1.19494	1.56723
Q7Z417	NUFIP2	5.21937	3.60247	0.000249764	0.016	+	C33A_C93	2.38387	12.3152	+	KIAA1321	FMR1-interacting protein NUFIP2 OS=Homo sapiens OX=9606 GN=NUFIP2 PE=1 SV=1	0	56.991	23	11	196	11	695	76.1	8.7	88.09	11	0	2.35317	2.23848	2.37918	-0.32193	-0.164915	0.306053	2.16729	1.76654	2.06736
O43896	KIF1C	0.780386	0.97015	0.107115	0.149108			-0.35774	-2.07095		KIAA0706	Kinesin-like protein KIF1C OS=Homo sapiens OX=9606 GN=KIF1C PE=1 SV=3	0	56.982	17	16	220	12	1103	122.9	6.9	95.92	16	3	0.461212	0.777282	0.992851	0.972305	1.092	1.24026	0.74415	0.454533	0.582478
O95573	ACSL3	0.81834	2.38544	0.00411684	0.022721	+	C33A_C93	-0.289228	-5.90471		ACS3 FACL3 LACS3	Fatty acid CoA ligase Acsl3 OS=Homo sapiens OX=9606 GN=ACSL3 PE=1 SV=3	0	56.815	19	13	265	12	720	80.4	8.38	123.49	13	1	1.74998	1.84096	1.79103	2.00059	2.12562	2.12344	1.92529	1.88093	1.91089
Q9Y287	ITM2B	0.670486	1.58938	0.0257408	0.0562207			-0.57672	-3.46327	+	BRI BRI2	Integral membrane protein 2B OS=Homo sapiens OX=9606 GN=ITM2B PE=1 SV=1	0	56.804	42	11	264	11	266	30.3	5.14	110.05	11	0	4.84121	4.31828	4.48329	5.08172	5.24742	5.0438	4.21528	3.40239	4.4527
Q14151	SAFB2	0.749229	1.10654	0.0782456	0.117997			-0.41652	-2.35315		KIAA0138	Scaffold attachment factor B2 OS=Homo sapiens OX=9606 GN=SAFB2 PE=1 SV=1	0	56.715	16	14	144	6	953	107.4	6.16	57.46	14	4	0.29896	-0.114717	0.460679	0.720384	0.584515	0.589584	0.0324434	0.43054	0.0282546
O95817	BAG3	0.498729	0.611071	0.244866	0.302555			-1.00367	-1.36196		BIS	BAG family molecular chaperone regulator 3 OS=Homo sapiens OX=9606 GN=BAG3 PE=1 SV=3	0	56.67	30	11	150	11	575	61.6	6.95	45.22	11	0	-2.2404	-0.281968	-0.091006	0.340529	0.454528	-0.397421	0.0136531	0.758361	0.48435
Q15645	TRIP13	1.0361	0.263457	0.545184	0.674363			0.0511572	0.660237		PCH2	Pachytene checkpoint protein 2 homolog OS=Homo sapiens OX=9606 GN=TRIP13 PE=1 SV=2	0	56.657	33	10	306	10	432	48.5	6.09	139	10	0	3.08567	3.0337	3.15783	2.95335	2.99392	3.17646	3.41713	3.20663	3.31384
P21980	TGM2	0.799992	1.4498	0.0354974	0.0695667			-0.321943	-3.12085			Protein-glutamine gamma-glutamyltransferase 2 OS=Homo sapiens OX=9606 GN=TGM2 PE=1 SV=2	0	56.533	29	13	235	13	687	77.3	5.22	74.36	13	0	1.72559	1.83995	1.97363	2.02974	2.19172	2.28354	0.8998	0.915924	0.988336
O60524	NEMF	1.25712	0.553314	0.279696	0.347464			0.330122	1.24922		SDCCAG1	Ribosome quality control complex subunit NEMF OS=Homo sapiens OX=9606 GN=NEMF PE=1 SV=4	0	56.445	18	14	149	14	1076	122.9	6.35	65.68	14	0	1.04823	0.791593	1.12062	1.04303	0.723647	0.203395	0.957543	0.826115	0.772137
Q16822	PCK2	0.998915	0.0097994	0.977689	0.990512			-0.00156625	-0.0297539		PEPCK2	Phosphoenolpyruvate carboxykinase [GTP], mitochondrial OS=Homo sapiens OX=9606 GN=PCK2 PE=1 SV=4	0	56.38	26	14	262	14	640	70.7	7.62	114.38	14	0	2.71305	2.63831	2.79155	2.66332	2.7229	2.76139	2.60238	2.62114	2.45287
P62241	RPS8	1.23834	1.63334	0.0232626	0.0529164			0.308407	3.57542			Small ribosomal subunit protein eS8 OS=Homo sapiens OX=9606 GN=RPS8 PE=1 SV=2	0	56.377	48	11	742	11	208	24.2	10.32	357	11	0	6.68921	6.51712	6.49919	6.30163	6.13924	6.33943	6.72332	6.11891	6.39932
P40227	CCT6A	1.08729	1.0012	0.0997238	0.141738			0.120741	2.13431		CCT6 CCTZ	T-complex protein 1 subunit zeta OS=Homo sapiens OX=9606 GN=CCT6A PE=1 SV=3	0	56.192	28	12	211	9	531	58	6.68	90.76	12	2	2.99681	2.90822	2.95471	2.89663	2.86792	2.73296	2.6587	1.87689	2.70591
Q9Y4W6	AFG3L2	1.77634	2.07294	0.00845402	0.031726	+	C33A_C93	0.828908	4.83118	+		AFG3-like protein 2 OS=Homo sapiens OX=9606 GN=AFG3L2 PE=1 SV=2	0	56.151	21	15	215	15	797	88.5	8.66	84.69	15	0	1.19712	1.73575	1.58852	0.558375	0.731806	0.744491	1.33501	1.79492	1.64192
Q9NZN4	EHD2	0.867099	0.939199	0.115027	0.154884			-0.205732	-2.00826		PAST2	EH domain-containing protein 2 OS=Homo sapiens OX=9606 GN=EHD2 PE=1 SV=2	0	56.039	33	14	238	12	543	61.1	6.46	84.48	14	2	2.28238	2.23549	2.06161	2.55129	2.29953	2.34585	1.78624	1.99945	2.30978
O75179	ANKRD17	2.15089	2.36612	0.00430405	0.0225199	+	C33A_C93	1.10494	5.83324	+	GTAR KIAA0697	Ankyrin repeat domain-containing protein 17 OS=Homo sapiens OX=9606 GN=ANKRD17 PE=1 SV=3	0	55.965	6	14	235	6	2603	274.1	6.52	106.81	14	0	-0.93774	-0.707231	-0.701681	-2.17877	-1.9017	-1.58099	-1.0027	-0.998706	-1.02052
Q9H2U1	DHX36	1.22423	0.488447	0.324753	0.40512			0.291873	1.12176		DDX36 KIAA1488 MLEL1 RHAU	ATP-dependent DNA/RNA helicase DHX36 OS=Homo sapiens OX=9606 GN=DHX36 PE=1 SV=2	0	55.938	18	12	114	12	1008	114.7	7.68	40.43	12	0	0.804169	0.633124	0.218107	0.516436	0.382523	-0.119178	-0.2753	-0.283374	0.00454549
P62750	RPL23A	1.26606	1.45232	0.0352922	0.0692172			0.340348	3.12686			Large ribosomal subunit protein uL23 OS=Homo sapiens OX=9606 GN=RPL23A PE=1 SV=1	0	55.899	45	9	505	9	156	17.7	10.45	216.15	9	0	6.17673	5.91913	6.02967	5.79239	5.5436	5.76849	6.33683	5.65633	6.04082
Q96S55	WRNIP1	0.880941	0.395623	0.40214	0.507464			-0.182883	-0.936272		WHIP	ATPase WRNIP1 OS=Homo sapiens OX=9606 GN=WRNIP1 PE=1 SV=2	0	55.895	24	12	199	12	665	72.1	6.1	88.64	12	0	2.5675	1.94958	2.12183	2.52562	2.31883	2.34311	2.45795	2.0997	2.54333
P05787	KRT8	1.12994	0.35789	0.438642	0.554707			0.176246	0.859263		CYK8	Keratin, type II cytoskeletal 8 OS=Homo sapiens OX=9606 GN=KRT8 PE=1 SV=7	0	55.754	24	15	329	9	483	53.7	5.59	155.63	15	0	1.02944	1.65248	1.08581	1.13305	0.979967	1.12597	1.18825	2.32831	1.36985
Q9NSE4	IARS2	1.1726	1.17104	0.0674468	0.104659			0.229717	2.49052			Isoleucine--tRNA ligase, mitochondrial OS=Homo sapiens OX=9606 GN=IARS2 PE=1 SV=2	0	55.745	19	14	183	14	1012	113.7	7.2	63.73	14	0	0.363043	0.567308	0.528378	0.189111	0.391976	0.188491	0.392996	0.32402	0.602584
Q9Y4B5	MTCL1	0.815879	0.183369	0.655588	0.779108			-0.293573	-0.481086		CCDC165 KIAA0802 SOGA2	Microtubule cross-linking factor 1 OS=Homo sapiens OX=9606 GN=MTCL1 PE=1 SV=5	0	55.671	12	17	127	15	1905	209.4	6.43	35.05	17	0	-2.19439	-3.81199	-1.95893	-2.72019	-2.12736	-2.23705	-2.03946	-2.33183	-2.72385
P01889	HLA-B	0.639543	2.0147	0.00966724	0.0343499	+	C33A_C93	-0.644888	-4.6492	+	HLAB	HLA class I histocompatibility antigen, B alpha chain OS=Homo sapiens OX=9606 GN=HLA-B PE=1 SV=3	0	55.373	36	11	414	6	362	40.4	5.85	195.46	11	4	4.98313	4.74006	4.58251	5.43075	5.27534	5.53427	4.9847	4.34482	4.75142
Q5VYK3	ECPAS	0.550426	0.914993	0.121621	0.161679			-0.86138	-1.95953		ECM29 KIAA0368	Proteasome adapter and scaffold protein ECM29 OS=Homo sapiens OX=9606 GN=ECPAS PE=1 SV=2	0	55.369	11	15	151	15	1845	204.2	7.12	60.09	15	0	-1.29755	0.140301	-0.345873	0.603522	0.25985	0.21765	-4.29673	-0.333915	-1.06377
O15371	EIF3D	1.0134	0.0471165	0.897188	0.952334			0.0192071	0.137623		EIF3S7	Eukaryotic translation initiation factor 3 subunit D OS=Homo sapiens OX=9606 GN=EIF3D PE=1 SV=1	0	55.349	37	12	272	12	548	63.9	6.05	133.93	12	0	3.02151	2.81164	3.18324	3.00955	3.12729	2.82193	2.92629	3.09804	2.83492
P36873	PPP1CC	0.848576	0.482032	0.329585	0.411686			-0.236885	-1.10907			Serine/threonine-protein phosphatase PP1-gamma catalytic subunit OS=Homo sapiens OX=9606 GN=PPP1CC PE=1 SV=1	0	55.281	43	10	260	1	323	37	6.54	96.66	10	0	-1.11027	-0.741889	-0.384876	-0.574269	-0.521715	-0.430394	-0.492954	-0.28816	-0.509478
Q2M389	WASHC4	0.871153	0.611237	0.244773	0.302591			-0.199002	-1.36228		KIAA1033	WASH complex subunit 4 OS=Homo sapiens OX=9606 GN=WASHC4 PE=1 SV=2	0	55.198	15	16	164	16	1173	136.3	7.44	52.06	16	0	0.335295	0.62236	0.829408	0.802734	0.741687	0.839649	0.993082	0.678919	0.713761
Q9BRZ2	TRIM56	1.36358	1.39198	0.0405529	0.0732786			0.447404	2.98463		RNF109	E3 ubiquitin-protein ligase TRIM56 OS=Homo sapiens OX=9606 GN=TRIM56 PE=1 SV=3	0	55.187	29	14	175	14	755	81.4	7.74	60.42	14	0	2.56149	2.41529	2.69499	2.02648	1.94508	2.35801	3.29694	2.78202	2.9995
Q86XX4	FRAS1	0.770691	1.70212	0.0198556	0.0492879	+	C33A_C93	-0.375775	-3.7553		KIAA1500	Extracellular matrix organizing protein FRAS1 OS=Homo sapiens OX=9606 GN=FRAS1 PE=1 SV=2	0	55.117	5	15	116	15	4008	442.9	5.57	37.6	15	0	0.719871	0.52196	0.537841	0.816272	1.02409	1.06663	0.768137	0.431971	0.688328
Q12789	GTF3C1	0.189054	1.04482	0.0901939	0.130485			-2.40313	-2.22416			General transcription factor 3C polypeptide 1 OS=Homo sapiens OX=9606 GN=GTF3C1 PE=1 SV=4	0	54.815	10	15	115	15	2109	238.7	7.3	29.37	15	0	-2.13903	1.13057	1.0277	2.32422	2.24749	2.65693	1.35934	-2.24634	1.18191
Q96AG4	LRRC59	2.04652	3.01293	0.000970658	0.014411	+	C33A_C93	1.03317	8.67751	+		Leucine-rich repeat-containing protein 59 OS=Homo sapiens OX=9606 GN=LRRC59 PE=1 SV=1	0	54.813	49	12	236	12	307	34.9	9.57	107.54	12	0	3.57438	3.83552	3.63173	2.81109	2.5056	2.62542	3.81245	3.2763	3.38476
P13010	XRCC5	0.666428	1.5229	0.0299983	0.0660933			-0.585479	-3.29769	+	G22P2	X-ray repair cross-complementing protein 5 OS=Homo sapiens OX=9606 GN=XRCC5 PE=1 SV=3	0	54.767	21	14	240	14	732	82.7	5.81	104.82	14	0	2.14614	2.26092	2.36172	3.15949	2.598	2.76773	2.56152	1.94487	2.02378
Q9HD20	ATP13A1	0.667325	1.3917	0.0405791	0.0731973			-0.583538	-2.98397		ATP13A KIAA1825	Endoplasmic reticulum transmembrane helix translocase OS=Homo sapiens OX=9606 GN=ATP13A1 PE=1 SV=2	0	54.716	14	13	148	13	1204	132.9	8.13	46.29	13	0	-0.437962	-0.900525	-0.884086	-0.370571	0.057676	-0.159064	-1.52521	-0.686925	-0.665894
Q969V3	NCLN	0.723836	2.13745	0.00728703	0.0282667	+	C33A_C93	-0.466266	-5.03903	+		BOS complex subunit NCLN OS=Homo sapiens OX=9606 GN=NCLN PE=1 SV=2	0	54.665	23	10	218	10	563	62.9	6.89	76.94	10	0	1.28961	1.3244	1.38913	1.93375	1.83333	1.63486	1.40355	0.946098	1.31313
P08581	MET	0.782845	0.675616	0.211049	0.265787			-0.353202	-1.48768			Hepatocyte growth factor receptor OS=Homo sapiens OX=9606 GN=MET PE=1 SV=4	0	54.557	13	14	186	14	1390	155.4	7.33	76.33	14	0	1.30137	1.05902	0.534563	1.26722	1.22738	1.45996	1.18722	0.609391	0.854684
Q9NZV1	CRIM1	1.16304	0.429149	0.372264	0.468065			0.217903	1.00382		S52	Cysteine-rich motor neuron 1 protein OS=Homo sapiens OX=9606 GN=CRIM1 PE=1 SV=1	0	54.493	15	14	153	14	1036	113.7	5.21	77.06	14	0	1.4585	1.35562	1.8967	1.23542	1.19053	1.63117	2.41892	2.5049	2.10489
P54652	HSPA2	0.938771	0.314172	0.485096	0.60438			-0.0911552	-0.768412			Heat shock-related 70 kDa protein 2 OS=Homo sapiens OX=9606 GN=HSPA2 PE=1 SV=1	0	54.428	16	11	491	6	639	70	5.74	213.81	11	0	5.85007	5.86193	5.69738	5.86768	5.7252	6.08997	6.08106	5.58407	5.84912
P63104	YWHAZ	1.0115	0.0451319	0.901297	0.955514			0.0164967	0.132081			14-3-3 protein zeta/delta OS=Homo sapiens OX=9606 GN=YWHAZ PE=1 SV=1	0	54.374	58	13	246	10	245	27.7	4.79	121.11	13	1	3.27133	3.19062	3.37967	3.06263	3.27887	3.45063	3.37905	3.29729	3.42055
Q9UKV8	AGO2	2.09273	2.36711	0.0042943	0.022589	+	C33A_C93	1.06539	5.83686	+	EIF2C2	Protein argonaute-2 OS=Homo sapiens OX=9606 GN=AGO2 PE=1 SV=3	0	54.237	19	12	229	7	859	97.1	9.19	89.91	12	2	1.93188	1.75022	2.10423	0.834501	1.13857	0.617087	1.95852	2.04077	1.70348
P22626	HNRNPA2B1	1.01537	0.129411	0.742317	0.849679			0.0220124	0.352408		HNRPA2B1	Heterogeneous nuclear ribonucleoproteins A2/B1 OS=Homo sapiens OX=9606 GN=HNRNPA2B1 PE=1 SV=2	0	54.192	41	13	399	12	353	37.4	8.95	209.66	13	0	4.5331	4.53788	4.59945	4.4786	4.47365	4.65215	4.6106	4.36348	4.43528
P15880	RPS2	1.54996	2.51738	0.00303824	0.022397	+	C33A_C93	0.63223	6.41288	+	RPS4	Small ribosomal subunit protein uS5 OS=Homo sapiens OX=9606 GN=RPS2 PE=1 SV=2	0	54.15	40	11	594	11	293	31.3	10.24	308.38	11	0	6.41662	6.34447	6.24055	5.82423	5.74063	5.54008	6.2065	5.75945	6.30668
Q9UKV3	ACIN1	0.932487	0.280626	0.524052	0.651443			-0.100844	-0.697241		ACINUS KIAA0670	Apoptotic chromatin condensation inducer in the nucleus OS=Homo sapiens OX=9606 GN=ACIN1 PE=1 SV=2	0	54.026	14	14	186	14	1341	151.8	6.43	64.34	14	0	1.08965	1.24693	1.35441	1.56923	1.26234	1.16195	0.729047	0.160657	0.216162
Q15386	UBE3C	0.816768	0.857276	0.138907	0.181266			-0.292002	-1.84428		KIAA0010 KIAA10	Ubiquitin-protein ligase E3C OS=Homo sapiens OX=9606 GN=UBE3C PE=1 SV=3	0	54.018	14	14	191	14	1083	123.8	6.71	81.43	14	0	0.788719	0.669264	0.861715	0.803913	1.31651	1.07528	0.763659	0.777312	0.905251
O75083	WDR1	0.806884	0.460004	0.346734	0.434155			-0.309567	-1.0654			WD repeat-containing protein 1 OS=Homo sapiens OX=9606 GN=WDR1 PE=1 SV=4	0	53.994	32	12	173	12	606	66.2	6.65	67.34	12	0	0.705437	1.60814	0.801903	1.37863	1.24979	1.41576	0.228282	0.174525	0.925274
Q9ULX3	NOB1	1.98423	3.34046	0.000456606	0.0165833	+	C33A_C93	0.988582	10.5502	+	ART4 NOB1P PSMD8BP1	RNA-binding protein NOB1 OS=Homo sapiens OX=9606 GN=NOB1 PE=1 SV=1	0	53.562	25	11	285	11	412	46.6	7.18	142.77	11	0	2.93838	3.15654	3.17256	2.20251	2.01175	2.08747	3.78216	3.90641	3.5482
P06493	CDK1	1.01236	0.0560994	0.878821	0.943001			0.0177207	0.162459		CDC2 CDC28A CDKN1 P34CDC2	Cyclin-dependent kinase 1 OS=Homo sapiens OX=9606 GN=CDK1 PE=1 SV=3	0	53.347	48	10	315	9	297	34.1	8.4	139.92	10	1	3.742	3.70965	3.5161	3.47371	3.74237	3.69851	3.68562	3.36347	3.4977
Q86SQ0	PHLDB2	4.03415	1.45844	0.0347985	0.0692145			2.01227	3.14147	+	LL5B	Pleckstrin homology-like domain family B member 2 OS=Homo sapiens OX=9606 GN=PHLDB2 PE=1 SV=2	0	53.342	14	15	131	15	1253	142.1	7.43	40.81	15	0	0.193699	0.2904	0.885293	-2.75016	-1.10279	-0.814459	1.0827	1.49821	0.819385
P33176	KIF5B	1.54847	0.754152	0.176136	0.225137			0.630842	1.64103		KNS KNS1	Kinesin-1 heavy chain OS=Homo sapiens OX=9606 GN=KIF5B PE=1 SV=1	0	53.274	21	15	114	15	963	109.6	6.51	40.35	15	0	0.347259	0.583569	0.336081	0.541594	-0.541481	-0.62573	0.11329	0.0342321	-0.139326
P62140	PPP1CB	0.958933	0.0590162	0.872939	0.940659			-0.0604977	-0.170439			Serine/threonine-protein phosphatase PP1-beta catalytic subunit OS=Homo sapiens OX=9606 GN=PPP1CB PE=1 SV=3	0	53.065	42	10	214	3	327	37.2	6.19	76.65	10	0	-1.47995	-1.76633	-1.18679	-2.00496	-1.31013	-0.936492	-1.05264	-1.2095	-1.01191
Q9H5V8	CDCP1	0.759552	1.31869	0.0480081	0.0819653			-0.396779	-2.8163		TRASK	CUB domain-containing protein 1 OS=Homo sapiens OX=9606 GN=CDCP1 PE=1 SV=3	0	53.061	15	13	270	13	836	92.9	7.96	129.93	13	0	2.22836	1.87126	1.90802	2.49499	2.47025	2.23274	2.02573	1.39992	1.79229
P08865	RPSA	1.32715	1.33009	0.0467637	0.0812133			0.408333	2.84219		LAMBR LAMR1	Small ribosomal subunit protein uS2 OS=Homo sapiens OX=9606 GN=RPSA PE=1 SV=4	0	52.851	43	9	355	9	295	32.8	4.87	177.06	9	0	4.51062	4.85961	4.66551	4.37664	4.06588	4.36823	4.55485	4.35495	4.36504
P98175	RBM10	1.27503	1.80654	0.0156121	0.0420784	+	C33A_C93	0.350535	4.03937		DXS8237E GPATC9 GPATCH9 KIAA0122	RNA-binding protein 10 OS=Homo sapiens OX=9606 GN=RBM10 PE=1 SV=3	0	52.839	17	13	196	10	930	103.5	5.97	82.71	13	1	1.67153	1.45938	1.65939	1.25842	1.14911	1.33117	1.75476	1.92577	1.78721
Q8WUQ7	CACTIN	1.58496	2.10733	0.0078104	0.0312779	+	C33A_C93	0.664449	4.94114	+	C19orf29	Splicing factor Cactin OS=Homo sapiens OX=9606 GN=CACTIN PE=1 SV=3	0	52.801	23	13	95	13	758	88.6	9.14	32.55	13	0	1.42287	1.39597	1.74192	0.984855	0.722532	0.860021	-2.09717	-2.09565	-6.03238
P12236	SLC25A6	1.4387	3.30874	0.000491202	0.0156078	+	C33A_C93	0.524769	10.3535	+	AAC3 ANT3	ADP/ATP translocase 3 OS=Homo sapiens OX=9606 GN=SLC25A6 PE=1 SV=4	0	52.758	42	12	500	3	298	32.8	9.74	272.33	12	1	2.8043	2.77998	2.6554	2.20055	2.26385	2.20097	2.55259	2.2768	2.59527
Q15417	CNN3	1.06947	0.147032	0.712801	0.821458			0.0968943	0.395294			Calponin-3 OS=Homo sapiens OX=9606 GN=CNN3 PE=1 SV=1	0	52.743	36	11	237	10	329	36.4	6.05	111.64	11	0	2.29098	2.33584	2.74139	1.97508	2.64093	2.4615	3.29454	4.05076	3.57529
P46776	RPL27A	1.19973	1.39505	0.0402666	0.0729989			0.262708	2.9918			Large ribosomal subunit protein uL15 OS=Homo sapiens OX=9606 GN=RPL27A PE=1 SV=2	0	52.667	33	8	783	8	148	16.6	11	389.65	8	0	7.11598	7.01077	6.98371	6.77369	6.63923	6.90941	7.23598	6.43476	6.8841
Q9H4M9	EHD1	0.716856	2.20766	0.00619924	0.0271051	+	C33A_C93	-0.480245	-5.27306	+	PAST PAST1	EH domain-containing protein 1 OS=Homo sapiens OX=9606 GN=EHD1 PE=1 SV=2	0	52.664	33	13	127	11	534	60.6	6.83	47.16	13	2	1.89755	1.7551	1.71703	2.13503	2.29145	2.38393	1.34933	1.3331	1.56743
Q96GA3	LTV1	0.794162	0.370327	0.426258	0.537011			-0.332494	-0.884774		C6orf93	Protein LTV1 homolog OS=Homo sapiens OX=9606 GN=LTV1 PE=1 SV=1	0	52.394	26	12	166	12	475	54.8	4.91	67.51	12	0	5.64791	5.21892	6.06057	5.44791	6.043	6.43398	6.18416	5.17011	6.24941
Q96HS1	PGAM5	1.62286	2.70057	0.00199266	0.0191667	+	C33A_C93	0.698541	7.1802	+		Serine/threonine-protein phosphatase PGAM5, mitochondrial OS=Homo sapiens OX=9606 GN=PGAM5 PE=1 SV=2	0	52.335	37	10	279	10	289	32	8.68	123.35	10	0	3.84632	3.69595	3.67385	3.12488	2.87863	3.11699	3.83613	3.31936	3.7393
Q8IWX8	CHERP	1.21073	0.653742	0.221952	0.276666			0.275883	1.44507		DAN26 SCAF6	Calcium homeostasis endoplasmic reticulum protein OS=Homo sapiens OX=9606 GN=CHERP PE=1 SV=3	0	52.312	16	11	162	11	916	103.6	9.04	52	11	0	1.35391	1.05643	1.43722	1.1041	0.708616	1.20719	0.499587	0.776505	0.539411
P18621	RPL17	1.25716	1.2187	0.0604363	0.0991842			0.330165	2.59388			Large ribosomal subunit protein uL22 OS=Homo sapiens OX=9606 GN=RPL17 PE=1 SV=3	0	52.285	39	10	351	10	184	21.4	10.17	217.05	10	0	5.9061	5.63428	5.57269	5.52469	5.28693	5.31096	5.9513	5.20766	5.74489
Q00653	NFKB2	0.98937	0.0285865	0.936297	0.972505			-0.0154178	-0.0850657		LYT10	Nuclear factor NF-kappa-B p100 subunit OS=Homo sapiens OX=9606 GN=NFKB2 PE=1 SV=4	0	52.229	20	13	140	13	900	96.7	6.25	44.57	13	0	0.473873	0.571548	0.597166	0.905365	0.311868	0.471607	1.18784	1.03114	1.15089
O95425	SVIL	2.50687	0.794987	0.160329	0.205192			1.32588	1.72117			Supervillin OS=Homo sapiens OX=9606 GN=SVIL PE=1 SV=2	0	52.189	10	13	78	13	2214	247.6	6.98	27.7	13	0	-1.73902	-0.035688	-1.30346	-3.50264	-1.71235	-1.84084	-1.14209	-0.873514	-1.29129
O43172	PRPF4	1.00043	0.000761257	0.998249	0.999267			0.000620494	0.0023351		PRP4	U4/U6 small nuclear ribonucleoprotein Prp4 OS=Homo sapiens OX=9606 GN=PRPF4 PE=1 SV=2	0	52.113	34	13	191	13	522	58.4	7.42	68.48	13	0	0.624195	0.632409	1.10442	1.07145	0.918277	0.369437	1.03807	0.930361	0.840166
Q6PGP7	SKIC3	0.871063	0.426442	0.374591	0.471404			-0.199151	-0.998393		KIAA0372 TTC37	Superkiller complex protein 3 OS=Homo sapiens OX=9606 GN=SKIC3 PE=1 SV=1	0	52.098	11	14	118	14	1564	175.4	7.53	36.37	14	0	0.735041	0.694462	0.300277	1.0307	0.534517	0.76201	0.751543	-0.135846	0.431426
P06576	ATP5F1B	1.08181	1.23224	0.0585812	0.0963153			0.11345	2.62354		ATP5B ATPMB ATPSB	ATP synthase subunit beta, mitochondrial OS=Homo sapiens OX=9606 GN=ATP5F1B PE=1 SV=3	0	52.097	33	11	235	11	529	56.5	5.4	101.12	11	0	3.30745	3.33644	3.22628	3.1608	3.13802	3.23101	3.42449	3.39177	3.44984
Q96II8	LRCH3	1.34341	1.76178	0.0173071	0.0448889	+	C33A_C93	0.425896	3.91592			DISP complex protein LRCH3 OS=Homo sapiens OX=9606 GN=LRCH3 PE=1 SV=2	0	52.046	29	15	115	14	777	86	6.71	44.58	15	1	0.537556	0.605783	0.437589	0.229026	0.163804	-0.0895914	0.725524	0.765869	0.748376
P11388	TOP2A	1.52472	1.39943	0.0398628	0.0722152			0.608543	3.00201		TOP2	DNA topoisomerase 2-alpha OS=Homo sapiens OX=9606 GN=TOP2A PE=1 SV=3	0	52.022	10	13	199	13	1531	174.3	8.72	78.41	13	0	1.17724	1.12151	1.15086	0.379802	0.942919	0.301262	1.45981	1.31938	1.4405
P35222	CTNNB1	1.22232	0.246687	0.566648	0.694362			0.289625	0.623667		CTNNB	Catenin beta-1 OS=Homo sapiens OX=9606 GN=CTNNB1 PE=1 SV=1	0	51.982	20	11	192	10	781	85.4	5.86	80.09	11	0	1.18782	-0.200399	-0.142339	0.176109	-0.170168	-0.0297334	0.351457	-0.361582	0.313844
Q12802	AKAP13	0.766479	1.54849	0.0282823	0.063632			-0.383682	-3.36086		BRX HT31 LBC	A-kinase anchor protein 13 OS=Homo sapiens OX=9606 GN=AKAP13 PE=1 SV=2	0	51.776	6	14	136	14	2813	307.4	5.24	52.49	14	0	0.520968	0.284844	0.44618	0.895318	0.620196	0.887522	0.614579	0.220866	0.297772
P04049	RAF1	0.854242	0.82286	0.150363	0.193484			-0.227284	-1.77612		RAF	RAF proto-oncogene serine/threonine-protein kinase OS=Homo sapiens OX=9606 GN=RAF1 PE=1 SV=1	0	51.766	26	12	205	9	648	73	9.2	91.11	12	3	1.17993	1.23256	0.932377	1.50789	1.20601	1.31281	0.956042	1.18657	1.33076
Q86UP2	KTN1	1.76618	2.49914	0.00316854	0.0222482	+	C33A_C93	0.82063	6.34052	+	CG1 KIAA0004	Kinectin OS=Homo sapiens OX=9606 GN=KTN1 PE=1 SV=1	0	51.562	13	14	112	14	1357	156.2	5.64	33.61	14	0	0.960569	0.787106	0.850761	0.273557	-0.1281	-0.00890903	1.00943	0.581496	0.982071
O60271	SPAG9	0.906086	0.0541607	0.882753	0.944492			-0.14228	-0.157132		HSS KIAA0516 MAPK8IP4 SYD1	C-Jun-amino-terminal kinase-interacting protein 4 OS=Homo sapiens OX=9606 GN=SPAG9 PE=1 SV=4	0	51.514	13	14	61	14	1321	146.1	5.15	20.44	14	0	-4.1924	-2.62085	-1.81246	-3.72138	-1.72649	-2.75098	-0.287097	0.794551	0.11527
Q9BZF1	OSBPL8	0.987895	0.0311109	0.93087	0.971413			-0.0175698	-0.0923367		KIAA1451 ORP8 OSBP10	Oxysterol-binding protein-related protein 8 OS=Homo sapiens OX=9606 GN=OSBPL8 PE=1 SV=3	0	51.433	15	12	168	10	889	101.1	6.96	67.78	12	1	1.2702	1.11461	1.15005	1.23045	0.860647	1.49648	1.07775	0.918353	1.13077
P56192	MARS1	0.894235	0.407507	0.391285	0.495877			-0.161274	-0.960301		MARS	Methionine--tRNA ligase, cytoplasmic OS=Homo sapiens OX=9606 GN=MARS1 PE=1 SV=2	0	51.43	18	11	129	11	900	101.1	6.16	49.05	11	0	1.05205	1.05551	1.08757	0.907368	1.47486	1.29674	1.41408	1.2972	1.23128
Q06787	FMR1	2.0116	3.4141	0.000385393	0.0152857	+	C33A_C93	1.00835	11.0203	+		Fragile X messenger ribonucleoprotein 1 OS=Homo sapiens OX=9606 GN=FMR1 PE=1 SV=1	0	51.428	24	12	198	11	632	71.1	7.42	85.37	12	0	1.39739	1.2724	1.5491	0.48211	0.380443	0.331302	0.880316	0.774149	1.04914
P07237	P4HB	0.558086	2.88202	0.00131213	0.0150115	+	C33A_C93	-0.841442	-8.0188	+	ERBA2L PDI PDIA1 PO4DB	Protein disulfide-isomerase OS=Homo sapiens OX=9606 GN=P4HB PE=1 SV=3	0	51.423	29	13	231	13	508	57.1	4.87	105.52	13	0	1.53994	1.72092	1.78209	2.43556	2.45853	2.67318	1.86295	1.84351	1.75089
O75330	HMMR	2.19994	1.89429	0.0127557	0.0360974	+	C33A_C93	1.13746	4.28905	+	IHABP RHAMM	Hyaluronan mediated motility receptor OS=Homo sapiens OX=9606 GN=HMMR PE=1 SV=2	0	51.406	22	15	109	15	724	84	5.83	42.08	15	0	0.982676	1.4772	1.56453	0.0249935	0.591009	-0.00399165	1.88148	2.34431	1.65738
Q16513	PKN2	1.79525	1.47822	0.0332492	0.0680495			0.844185	3.18896	+	PRK2 PRKCL2	Serine/threonine-protein kinase N2 OS=Homo sapiens OX=9606 GN=PKN2 PE=1 SV=1	0	51.292	18	14	145	14	984	112	6.3	52.24	14	0	0.0587902	0.941773	0.38204	-0.326516	-0.502475	-0.32096	0.570615	0.0458723	-0.396074
P62280	RPS11	1.3178	0.461247	0.345743	0.432721			0.398128	1.06787			Small ribosomal subunit protein uS17 OS=Homo sapiens OX=9606 GN=RPS11 PE=1 SV=3	0	51.214	33	9	357	9	158	18.4	10.3	175.97	9	0	5.87138	5.758	5.15381	4.98272	4.81931	5.78677	5.27644	4.84851	5.78322
Q13610	PWP1	0.732421	1.57143	0.0268267	0.0618152			-0.449255	-3.41811			Periodic tryptophan protein 1 homolog OS=Homo sapiens OX=9606 GN=PWP1 PE=1 SV=1	0	51.09	33	10	204	10	501	55.8	4.77	83.92	10	0	2.19512	1.86905	2.22102	2.4396	2.52511	2.66823	1.43652	1.75542	2.11015
Q9ULV4	CORO1C	1.59961	0.584508	0.260311	0.324454			0.677723	1.31017		CRN2 CRNN4	Coronin-1C OS=Homo sapiens OX=9606 GN=CORO1C PE=1 SV=1	0	51.084	22	11	93	11	474	53.2	7.08	39.53	11	0	0.517971	1.97675	0.460431	0.0679396	0.280977	0.573066	-0.070402	0.698635	0.363205
Q9UK22	FBXO2	1.05277	0.319251	0.479456	0.59789			0.0741855	0.77907		FBX2	F-box only protein 2 OS=Homo sapiens OX=9606 GN=FBXO2 PE=1 SV=2	0	50.964	53	9	171	9	296	33.3	4.37	74.41	9	0	2.30816	2.45188	2.21568	2.12085	2.29825	2.33407	2.31736	1.31763	1.8723
Q9BTV4	TMEM43	0.517023	2.74849	0.00178449	0.0193096	+	C33A_C93	-0.951698	-7.3937	+		Transmembrane protein 43 OS=Homo sapiens OX=9606 GN=TMEM43 PE=1 SV=1	0	50.912	37	9	203	9	400	44.8	8.13	69.94	9	0	2.40714	2.45039	2.10807	3.1455	3.28607	3.38912	2.25665	2.03489	2.37747
O00541	PES1	1.21626	2.27607	0.00529582	0.0258728	+	C33A_C93	0.282449	5.50928			Pescadillo homolog OS=Homo sapiens OX=9606 GN=PES1 PE=1 SV=1	0	50.855	23	13	259	13	588	68	7.33	114.15	13	0	1.96928	1.89722	1.84093	1.56684	1.68693	1.60631	1.64684	1.406	1.83892
Q6PD62	CTR9	1.17801	0.756714	0.1751	0.224131			0.236351	1.64604		KIAA0155 SH2BP1	RNA polymerase-associated protein CTR9 homolog OS=Homo sapiens OX=9606 GN=CTR9 PE=1 SV=1	0	50.789	15	14	148	14	1173	133.4	6.77	51.64	14	0	1.03355	1.10944	0.910256	0.906926	0.91845	0.518811	0.879926	0.579669	0.668306
Q13049	TRIM32	0.85594	0.474158	0.335615	0.41964			-0.224418	-1.09349		HT2A	E3 ubiquitin-protein ligase TRIM32 OS=Homo sapiens OX=9606 GN=TRIM32 PE=1 SV=2	0	50.783	32	14	107	14	653	71.9	6.98	35.18	14	0	0.147615	0.0530357	0.435075	0.416376	0.740363	0.15224	-0.39015	-0.453417	-0.286591
O00560	SDCBP	0.799205	0.921674	0.119764	0.159169			-0.323362	-1.97295		MDA9 SYCL	Syntenin-1 OS=Homo sapiens OX=9606 GN=SDCBP PE=1 SV=1	0	50.773	48	9	283	9	298	32.4	7.53	100.85	9	0	4.63921	4.38255	4.13965	4.86372	4.60991	4.65787	4.27079	3.22887	4.27595
Q15424	SAFB	0.66208	0.656712	0.220439	0.275721			-0.594923	-1.45086		HAP HET SAFB1	Scaffold attachment factor B1 OS=Homo sapiens OX=9606 GN=SAFB PE=1 SV=4	0	50.695	14	11	140	3	915	102.6	5.47	55.91	11	0	-0.755897	-1.3172	-0.193024	0.227437	-0.629407	-0.079386	-0.366182	-0.538273	-0.801848
P18669	PGAM1	0.674858	1.41664	0.038314	0.0711745			-0.567344	-3.04235		PGAMA	Phosphoglycerate mutase 1 OS=Homo sapiens OX=9606 GN=PGAM1 PE=1 SV=2	0	50.627	57	10	188	10	254	28.8	7.18	71.91	10	0	2.32091	2.53061	1.95117	2.9854	2.79523	2.72408	2.3107	1.88288	2.16837
Q9BZH6	WDR11	0.500635	1.00005	0.0999892	0.141882			-0.998169	-2.13194		BRWD2 KIAA1351 WDR15	WD repeat-containing protein 11 OS=Homo sapiens OX=9606 GN=WDR11 PE=1 SV=1	0	50.625	15	13	138	13	1224	136.6	6.92	50.15	13	0	-1.00649	-1.82218	-0.374568	-0.46607	0.242751	0.0145899	-2.71918	-2.10974	-1.3616
Q14527	HLTF	1.13368	1.24975	0.0562667	0.0927686			0.181018	2.66211		HIP116A RNF80 SMARCA3 SNF2L3 ZBU1	Helicase-like transcription factor OS=Homo sapiens OX=9606 GN=HLTF PE=1 SV=2	0	50.597	16	13	173	13	1009	113.9	8.6	73.52	13	0	0.668882	0.68541	0.585162	0.526285	0.344459	0.525658	0.417393	0.166461	0.38809
P46531	NOTCH1	1.29127	0.232129	0.585964	0.713398			0.368785	0.591552		TAN1	Neurogenic locus notch homolog protein 1 OS=Homo sapiens OX=9606 GN=NOTCH1 PE=1 SV=4	0	50.567	6	11	129	11	2555	272.3	5.12	38.92	11	0	-0.893188	-1.18582	-2.30317	-2.02516	-0.967777	-2.49559	-0.715006	-1.61583	-1.55001
Q8NB90	AFG2A	1.02524	0.028605	0.936257	0.973159			0.035956	0.0851191		SPAF SPATA5	ATPase family gene 2 protein homolog A OS=Homo sapiens OX=9606 GN=AFG2A PE=1 SV=3	0	50.421	18	13	218	13	893	97.8	5.66	98.67	13	0	0.142322	0.406903	-0.417562	-0.67885	0.417346	0.2853	0.13118	-0.901812	0.203365
Q9NQ29	LUC7L	1.40208	1.57329	0.0267122	0.0617057			0.487571	3.42277		LUC7L1	Putative RNA-binding protein Luc7-like 1 OS=Homo sapiens OX=9606 GN=LUC7L PE=1 SV=1	0	50.358	27	10	208	4	371	43.7	9.92	91.41	10	0	0.756813	0.823213	0.991351	0.485165	0.502109	0.121391	0.813313	1.48532	1.07409
Q10471	GALNT2	0.42334	1.74428	0.0180184	0.0467334	+	C33A_C93	-1.24011	-3.86837	+		Polypeptide N-acetylgalactosaminyltransferase 2 OS=Homo sapiens OX=9606 GN=GALNT2 PE=1 SV=1	0	50.309	27	12	156	12	571	64.7	8.35	55.67	12	0	-0.540978	0.417099	0.331831	1.43721	1.12347	1.36761	-0.0313224	-0.339221	0.101751
P07195	LDHB	1.15382	0.80468	0.156791	0.200826			0.206418	1.74026			L-lactate dehydrogenase B chain OS=Homo sapiens OX=9606 GN=LDHB PE=1 SV=2	0	50.3	34	11	216	10	334	36.6	6.05	109.05	11	0	2.13659	2.26408	2.01014	1.74407	2.0276	2.01988	1.95333	1.86193	2.1794
P04075	ALDOA	1.15954	0.0828635	0.826298	0.912588			0.213552	0.234243		ALDA	Fructose-bisphosphate aldolase A OS=Homo sapiens OX=9606 GN=ALDOA PE=1 SV=2	0	50.259	39	10	147	9	364	39.4	8.09	54.25	10	1	-0.726039	2.31587	0.433885	0.731641	0.611639	0.0397767	-0.139227	1.32314	0.0470187
Q99661	KIF2C	5.26546	3.91045	0.0001229	0.0074	+	C33A_C93	2.39656	14.7521	+	KNSL6	Kinesin-like protein KIF2C OS=Homo sapiens OX=9606 GN=KIF2C PE=1 SV=2	0	50.245	22	13	122	12	725	81.3	7.83	45.98	13	0	0.447578	0.666095	0.763878	-1.95397	-1.51246	-1.8457	0.63163	0.465909	0.231151
Q3KQU3	MAP7D1	0.743273	2.56152	0.00274459	0.022432	+	C33A_C93	-0.428036	-6.59098	+	KIAA1187 PARCC1 RPRC1	MAP7 domain-containing protein 1 OS=Homo sapiens OX=9606 GN=MAP7D1 PE=1 SV=1	0	50.238	18	11	159	11	841	92.8	10.11	67.37	11	0	1.38242	1.34215	1.22742	1.76127	1.65999	1.81483	1.67361	0.738008	1.3259
P55265	ADAR	0.74328	1.06047	0.0870015	0.127362			-0.428022	-2.25666		ADAR1 DSRAD G1P1 IFI4	Double-stranded RNA-specific adenosine deaminase OS=Homo sapiens OX=9606 GN=ADAR PE=1 SV=4	0	50.236	12	13	135	13	1226	136	8.65	44.21	13	0	0.709932	0.569494	1.14887	1.26577	1.09689	1.3497	0.786997	1.03092	0.735347
Q9NZJ4	SACS	0.777922	0.690101	0.204126	0.256929			-0.362302	-1.51591		KIAA0730	Sacsin OS=Homo sapiens OX=9606 GN=SACS PE=1 SV=2	0	50.169	4	16	79	16	4579	520.8	7.05	22.5	16	0	0.384844	-0.0341141	0.472387	0.278505	0.858882	0.772636	0.233554	-0.248481	0.502962
Q02241	KIF23	2.25764	2.87549	0.00133201	0.0153446	+	C33A_C93	1.17482	7.98716	+	KNSL5 MKLP1	Kinesin-like protein KIF23 OS=Homo sapiens OX=9606 GN=KIF23 PE=1 SV=3	0	50.154	16	13	176	13	960	110	8.51	65.98	13	0	1.49947	1.49931	1.35631	0.141196	0.555132	0.134308	1.02466	1.31624	1.06537
Q08945	SSRP1	1.29901	1.9536	0.0111276	0.035744	+	C33A_C93	0.37741	4.4638		FACT80	FACT complex subunit SSRP1 OS=Homo sapiens OX=9606 GN=SSRP1 PE=1 SV=1	0	50.099	19	12	250	12	709	81	6.87	110.41	12	0	3.22146	3.16146	3.30415	2.91125	2.70499	2.93861	3.12237	2.98264	2.95585
O00203	AP3B1	1.06169	0.262082	0.546912	0.675353			0.0863643	0.657256		ADTB3A	AP-3 complex subunit beta-1 OS=Homo sapiens OX=9606 GN=AP3B1 PE=1 SV=3	0	50.043	12	12	236	12	1094	121.2	6.04	111.77	12	0	2.16526	2.19548	2.15873	2.12986	1.8416	2.28891	2.15072	1.99335	2.13896
Q8IZL8	PELP1	0.802389	1.29092	0.0511782	0.0841935			-0.317627	-2.75373		HMX3 MNAR	Proline-, glutamic acid- and leucine-rich protein 1 OS=Homo sapiens OX=9606 GN=PELP1 PE=1 SV=2	0	49.756	14	10	140	10	1130	119.6	4.34	72.22	10	0	2.19069	2.18822	2.47676	2.52772	2.55006	2.73077	2.69671	2.57088	2.4815
P46783	RPS10	1.27493	2.37184	0.00424772	0.0227284	+	C33A_C93	0.350419	5.85434	+		Small ribosomal subunit protein eS10 OS=Homo sapiens OX=9606 GN=RPS10 PE=1 SV=1	0	49.736	56	10	505	10	165	18.9	10.15	218.14	10	0	5.17331	5.28622	5.11619	4.79886	4.81922	4.90637	4.91188	4.42697	4.65153
Q9Y265	RUVBL1	1.21288	1.42678	0.0374304	0.0695104			0.278434	3.06623		INO80H NMP238 TIP49 TIP49A	RuvB-like 1 OS=Homo sapiens OX=9606 GN=RUVBL1 PE=1 SV=1	0	49.732	33	11	323	11	456	50.2	6.42	158.03	11	0	3.48047	3.50089	3.71546	3.37367	3.19724	3.29061	3.11772	2.87983	3.0298
Q53EP0	FNDC3B	1.22565	1.16277	0.0687427	0.106367			0.293553	2.47276		FAD104 NS5ABP37	Fibronectin type III domain-containing protein 3B OS=Homo sapiens OX=9606 GN=FNDC3B PE=1 SV=2	0	49.684	15	13	170	13	1204	132.8	5.95	58.98	13	0	1.01891	1.26709	1.29231	0.933697	0.745746	1.01821	1.58165	1.94646	1.4953
Q9P270	SLAIN2	2.36614	2.85754	0.00138823	0.0157333	+	C33A_C93	1.24253	7.90076	+	KIAA1458	SLAIN motif-containing protein 2 OS=Homo sapiens OX=9606 GN=SLAIN2 PE=1 SV=2	0	49.664	25	11	220	11	581	62.5	9.45	103.35	11	0	2.22094	2.21639	2.68608	1.08925	1.15154	1.15501	3.32291	3.58515	3.05156
Q9UKM7	MAN1B1	0.785914	1.15427	0.0701025	0.108915			-0.347556	-2.45453			Endoplasmic reticulum mannosyl-oligosaccharide 1,2-alpha-mannosidase OS=Homo sapiens OX=9606 GN=MAN1B1 PE=1 SV=2	0	49.638	18	10	129	10	699	79.5	7.72	35.67	10	0	0.77696	0.933048	0.790776	1.43841	1.10771	0.99733	0.138985	0.282946	0.702973
P19784	CSNK2A2	0.956135	0.378706	0.418113	0.526545			-0.0647132	-0.901889		CK2A2	Casein kinase II subunit alpha' OS=Homo sapiens OX=9606 GN=CSNK2A2 PE=1 SV=1	0	49.632	33	10	237	10	350	41.2	8.56	93.92	10	0	2.38386	2.35602	2.28384	2.35968	2.5348	2.32338	2.02277	1.97745	1.89683
P49736	MCM2	0.869971	0.718828	0.191061	0.240592			-0.200962	-1.57196		BM28 CCNL1 CDCL1 KIAA0030	DNA replication licensing factor MCM2 OS=Homo sapiens OX=9606 GN=MCM2 PE=1 SV=4	0	49.604	13	11	116	11	904	101.8	5.52	41.4	11	0	0.11117	0.00836085	-0.10432	0.428585	0.0784455	0.111065	0.444749	0.88655	0.413507
P13489	RNH1	1.38631	0.66163	0.217957	0.273308			0.471253	1.46044		PRI RNH	Ribonuclease inhibitor OS=Homo sapiens OX=9606 GN=RNH1 PE=1 SV=2	0	49.516	39	11	149	11	461	49.9	4.82	53.72	11	0	0.839706	1.76898	1.0709	0.474522	0.757102	1.0342	0.986046	1.45614	1.4384
P11274	BCR	1.00779	0.0175633	0.960366	0.98011			0.0111982	0.0528763		BCR1 D22S11	Breakpoint cluster region protein OS=Homo sapiens OX=9606 GN=BCR PE=1 SV=2	0	49.486	11	14	169	14	1271	142.7	7.03	58.76	14	0	0.613628	0.074878	0.530856	0.621229	0.392209	0.17233	1.51519	1.70886	1.38207
Q9BSJ8	ESYT1	0.775612	0.67853	0.209638	0.263991			-0.366593	-1.49336		FAM62A KIAA0747 MBC2	Extended synaptotagmin-1 OS=Homo sapiens OX=9606 GN=ESYT1 PE=1 SV=1	0	49.474	15	13	168	13	1104	122.8	5.83	49.53	13	0	0.181345	0.703605	0.775773	0.720035	0.806865	1.2336	0.379284	-0.138673	0.374036
Q14839	CHD4	1.74074	3.80989	0.00015492	0.0124	+	C33A_C93	0.799703	13.9093	+		Chromodomain-helicase-DNA-binding protein 4 OS=Homo sapiens OX=9606 GN=CHD4 PE=1 SV=2	0	49.367	9	13	130	9	1912	217.9	5.86	49.93	13	0	1.16715	1.16148	1.24896	0.452853	0.432221	0.293401	1.21928	1.17839	1.13326
Q9BQ39	DDX50	0.90378	0.378083	0.418714	0.527422			-0.145957	-0.900617			ATP-dependent RNA helicase DDX50 OS=Homo sapiens OX=9606 GN=DDX50 PE=1 SV=1	0	49.292	19	11	183	9	737	82.5	9.17	81.91	11	0	1.19235	0.757695	0.745982	1.0282	1.17064	0.935059	0.911207	0.134939	0.797618
P62805	H4C1; H4C2; H4C3; H4C4; H4C5; H4C6; H4C8; H4C9; H4C11; H4C12; H4C13; H4C14; H4C15; H4C16	1.50618	3.12035	0.00075796	0.0150894	+	C33A_C93	0.590898	9.25462	+	H4/A H4FA HIST1H4A; H4/I H4FI HIST1H4B; H4/G H4FG HIST1H4C; H4/B H4FB HIST1H4D; H4/J H4FJ HIST1H4E; H4/C H4FC HIST1H4F; H4/H H4FH HIST1H4H; H4/M H4FM HIST1H4I; H4/E H4FE HIST1H4J; H4/D H4FD HIST1H4K; H4/K H4FK HIST1H4L; H4/N H4F2 H4FN HIST2H4 HIST2H4A; H4/O H4FO HIST2H4B; H4-16 HIST4H4	Histone H4 OS=Homo sapiens OX=9606 GN=H4C1 PE=1 SV=2	0	49.254	52	9	519	9	103	11.4	11.36	266.7	9	0	5.43512	5.4753	5.59696	4.94218	4.82973	4.96278	5.75924	5.42985	5.57034
P62269	RPS18	1.3532	2.03634	0.00919733	0.0322462	+	C33A_C93	0.436375	4.71621	+	D6S218E	Small ribosomal subunit protein uS13 OS=Homo sapiens OX=9606 GN=RPS18 PE=1 SV=3	0	49.25	45	10	406	10	152	17.7	10.99	227.77	10	0	5.31216	5.0863	5.09675	4.74292	4.62526	4.8179	5.3644	4.79066	5.07268
P32969	RPL9; RPL9P7; RPL9P8; RPL9P9	1.15052	1.00592	0.0986462	0.141122			0.202286	2.14398		; ; ;	Large ribosomal subunit protein uL6 OS=Homo sapiens OX=9606 GN=RPL9 PE=1 SV=1	0	49.211	41	8	414	8	192	21.9	9.95	186.31	8	0	6.00321	5.68999	5.76972	5.62764	5.62641	5.60201	5.74418	4.97684	5.83706
P82094	TMF1	0.750313	1.9609	0.0109421	0.0356606	+	C33A_C93	-0.414435	-4.48567	+	ARA160	TATA element modulatory factor OS=Homo sapiens OX=9606 GN=TMF1 PE=1 SV=2	0	49.119	13	12	109	12	1093	122.8	4.92	29.73	12	0	0.311838	0.551433	0.462994	0.793228	0.977189	0.799152	0.377428	-0.123623	0.134797
Q9UH99	SUN2	2.44169	2.59693	0.00252973	0.0217851	+	C33A_C93	1.28788	6.73687	+	FRIGG KIAA0668 RAB5IP UNC84B	SUN domain-containing protein 2 OS=Homo sapiens OX=9606 GN=SUN2 PE=1 SV=3	0	49.118	25	10	110	10	717	80.3	6.73	30.19	10	0	1.38328	1.05124	0.929219	-0.0965999	-0.426908	0.0236016	0.775461	-0.342665	0.659507
Q9ULW0	TPX2	18.1496	2.58288	0.00261291	0.0216066	+	C33A_C93	4.18187	6.67864	+	C20orf1 C20orf2 DIL2 HCA519	Targeting protein for Xklp2 OS=Homo sapiens OX=9606 GN=TPX2 PE=1 SV=2	0	49.115	22	13	109	13	747	85.6	9.23	39.65	13	0	0.249908	0.95609	0.465668	-4.79425	-2.901	-3.17869	1.7721	1.69088	1.68271
P10586	PTPRF	1.41656	0.52404	0.299199	0.371886			0.502388	1.19185		LAR	Receptor-type tyrosine-protein phosphatase F OS=Homo sapiens OX=9606 GN=PTPRF PE=1 SV=2	0	49.037	10	14	108	12	1907	212.7	6.3	31.54	14	1	0.213629	0.13933	-0.13572	-0.294132	0.19876	-1.19455	0.675071	-0.0713362	0.285903
A0FGR8	ESYT2	1.18437	0.481309	0.330134	0.412927			0.244122	1.10764		FAM62B KIAA1228	Extended synaptotagmin-2 OS=Homo sapiens OX=9606 GN=ESYT2 PE=1 SV=1	0	49.01	18	13	186	13	921	102.3	9.26	70.31	13	0	0.944456	1.09773	1.15111	0.830349	1.18154	0.449035	0.939214	0.636538	1.0231
Q92598	HSPH1	0.924683	0.53996	0.28843	0.358521			-0.112969	-1.22307		HSP105 HSP110 KIAA0201	Heat shock protein 105 kDa OS=Homo sapiens OX=9606 GN=HSPH1 PE=1 SV=1	0	48.979	20	14	134	12	858	96.8	5.39	59.84	14	2	3.61326	3.63639	3.71214	3.8321	3.87477	3.59384	3.46813	3.01983	3.15777
Q96PC5	MIA2	4.34362	2.57116	0.00268433	0.022374	+	C33A_C93	2.1189	6.63043	+	CTAGE5 MEA11 MEA6 MGEA11 MGEA6	Melanoma inhibitory activity protein 2 OS=Homo sapiens OX=9606 GN=MIA2 PE=1 SV=4	0	48.898	11	14	109	14	1412	159.7	4.69	43.2	14	0	1.09342	0.430132	0.50097	-1.50563	-1.82664	-0.999906	0.939141	-0.844552	0.495266
O00461	GOLIM4	0.515665	3.22233	0.00059933	0.0151858	+	C33A_C93	-0.955494	-9.83519	+	GIMPC GOLPH4 GPP130	Golgi integral membrane protein 4 OS=Homo sapiens OX=9606 GN=GOLIM4 PE=1 SV=1	0	48.882	18	10	160	10	696	81.8	4.77	50.02	10	0	0.26413	0.328917	0.27974	1.05829	1.36552	1.31545	1.1285	0.888206	0.59937
Q9BTU6	PI4K2A	0.894654	0.395377	0.402367	0.507388			-0.160599	-0.935774			Phosphatidylinositol 4-kinase type 2-alpha OS=Homo sapiens OX=9606 GN=PI4K2A PE=1 SV=1	0	48.859	27	12	186	12	479	54	8.29	73.21	12	0	1.00227	1.09152	1.19377	0.959044	1.51847	1.29185	0.944603	0.171099	0.93029
Q14157	UBAP2L	8.32661	4.12216	7.54812e-05	0.00758621	+	C33A_C93	3.05773	16.6916	+	KIAA0144 NICE4	Ubiquitin-associated protein 2-like OS=Homo sapiens OX=9606 GN=UBAP2L PE=1 SV=2	0	48.832	8	7	150	7	1087	114.5	7.11	74.22	7	0	2.72827	2.56827	3.12518	-0.144847	-0.20285	-0.403775	3.67573	3.95784	3.52243
Q5K651	SAMD9	0.381631	0.935852	0.115917	0.155946			-1.38975	-2.0015		C7orf5 DRIF1 KIAA2004 OEF1	Sterile alpha motif domain-containing protein 9 OS=Homo sapiens OX=9606 GN=SAMD9 PE=1 SV=1	0	48.812	12	15	82	15	1589	184.2	7.83	27.72	15	0	-3.15211	-4.94208	-3.54993	-3.24301	-1.74236	-2.48951	-3.09085	-3.96638	-3.14836
Q13347	EIF3I	0.751541	1.31131	0.0488299	0.0826047			-0.412076	-2.79963		EIF3S2 TRIP1	Eukaryotic translation initiation factor 3 subunit I OS=Homo sapiens OX=9606 GN=EIF3I PE=1 SV=1	0	48.728	36	9	174	9	325	36.5	5.64	70.11	9	0	2.2275	2.05248	2.4831	2.78916	2.68752	2.52262	1.29245	1.61261	1.00501
Q13085	ACACA	0.974373	0.0608326	0.869295	0.939308			-0.0374543	-0.175388		ACAC ACC1 ACCA	Acetyl-CoA carboxylase 1 OS=Homo sapiens OX=9606 GN=ACACA PE=1 SV=2	0	48.689	6	14	107	14	2346	265.4	6.37	39.42	14	0	-0.675617	-0.564094	-1.05953	-0.970629	-0.448561	-0.767693	-0.360306	-0.0576091	-0.160103
Q7L2J0	MEPCE	1.16609	0.298287	0.503167	0.626931			0.22168	0.734887		BCDIN3	7SK snRNA methylphosphate capping enzyme OS=Homo sapiens OX=9606 GN=MEPCE PE=1 SV=1	0	48.647	23	11	170	11	689	74.3	9.57	54.83	11	0	1.55784	1.43889	1.19937	1.57737	0.631252	1.32244	1.26829	1.14544	1.0895
P31946	YWHAB	0.869851	0.645387	0.226263	0.28165			-0.201159	-1.4288			14-3-3 protein beta/alpha OS=Homo sapiens OX=9606 GN=YWHAB PE=1 SV=3	0	48.621	52	11	173	7	246	28.1	4.83	94.18	11	0	1.63786	1.81194	1.54559	1.68325	2.08447	1.83115	1.87711	1.53252	1.85442
Q01780	EXOSC10	1.15535	0.776701	0.167224	0.213089			0.208334	1.68524		PMSCL PMSCL2 RRP6	Exosome complex component 10 OS=Homo sapiens OX=9606 GN=EXOSC10 PE=1 SV=2	0	48.589	20	12	119	12	885	100.8	8.46	39.21	12	0	1.4884	1.75828	1.78506	1.57804	1.51429	1.3144	1.92362	0.760183	1.40194
O95218	ZRANB2	1.58178	2.33547	0.00461877	0.0253373	+	C33A_C93	0.661545	5.72128	+	ZIS ZNF265	Zinc finger Ran-binding domain-containing protein 2 OS=Homo sapiens OX=9606 GN=ZRANB2 PE=1 SV=2	0	48.577	29	10	62	10	330	37.4	10.01	24.32	10	0	1.1313	0.965196	1.33186	0.491889	0.396439	0.555388	1.23626	1.44413	1.25058
P22090	RPS4Y1	1.23441	1.35448	0.0442101	0.0791574			0.303826	2.89792		RPS4Y	Small ribosomal subunit protein eS4, Y isoform 1 OS=Homo sapiens OX=9606 GN=RPS4Y1 PE=1 SV=2	0	48.563	22	7	342	7	263	29.4	10.24	156.7	7	0	5.0153	4.84838	4.84208	4.7099	4.42408	4.6603	5.06513	4.37219	4.73149
P52907	CAPZA1	1.82758	3.54107	0.000287692	0.0151111	+	C33A_C93	0.869935	11.878	+		F-actin-capping protein subunit alpha-1 OS=Homo sapiens OX=9606 GN=CAPZA1 PE=1 SV=3	0	48.479	44	9	181	7	286	32.9	5.69	70.04	9	2	2.75746	2.98022	2.90106	1.99485	1.96068	2.0734	2.94551	2.784	2.94688
Q14203	DCTN1	0.948882	0.0690845	0.852934	0.928582			-0.0756995	-0.197681			Dynactin subunit 1 OS=Homo sapiens OX=9606 GN=DCTN1 PE=1 SV=3	0	48.386	16	13	102	13	1278	141.6	5.81	32.47	13	0	-1.21426	-0.369728	-0.676275	-0.0922716	-0.979934	-0.960958	-1.10434	-1.58357	-1.42849
P38159	RBMX	0.663784	1.53253	0.0293406	0.0659368			-0.591215	-3.32138	+	HNRPG RBMXP1	RNA-binding motif protein, X chromosome OS=Homo sapiens OX=9606 GN=RBMX PE=1 SV=3	0	48.324	29	12	190	3	391	42.3	10.05	98.03	12	7	1.4182	1.22761	1.7703	2.21276	2.03838	1.93862	2.17495	1.91039	1.58474
P78371	CCT2	1.01043	0.0635897	0.863794	0.935431			0.0149639	0.182871		99D8.1 CCTB	T-complex protein 1 subunit beta OS=Homo sapiens OX=9606 GN=CCT2 PE=1 SV=4	0	48.308	29	12	148	12	535	57.5	6.46	55.24	12	0	2.08881	2.23716	1.95978	2.08605	2.10562	2.04918	2.1109	1.8323	1.87108
Q5JTV8	TOR1AIP1	0.723825	0.477114	0.333339	0.416725			-0.466286	-1.09934		LAP1	Torsin-1A-interacting protein 1 OS=Homo sapiens OX=9606 GN=TOR1AIP1 PE=1 SV=2	0	48.281	28	10	106	10	583	66.2	8.18	34.47	10	0	-1.40636	-0.305168	-0.780909	0.174464	-0.504376	-0.763662	-0.126389	-0.307378	-0.210224
P83731	RPL24	1.4272	3.23711	0.000579277	0.0157431	+	C33A_C93	0.513191	9.92209	+		Large ribosomal subunit protein eL24 OS=Homo sapiens OX=9606 GN=RPL24 PE=1 SV=1	0	48.177	39	9	527	9	157	17.8	11.25	270.52	9	0	4.47421	4.37596	4.31922	3.84867	3.9265	3.85465	4.38453	4.00638	4.34354
Q9Y613	FHOD1	1.66763	0.711539	0.194295	0.244493			0.737802	1.55773		FHOS FHOS1	FH1/FH2 domain-containing protein 1 OS=Homo sapiens OX=9606 GN=FHOD1 PE=1 SV=3	0	48.172	17	14	118	14	1164	126.5	6.39	35.77	14	0	0.0826149	0.378773	-0.369841	-0.847393	0.0811955	-1.35566	-0.217716	-0.92797	0.205145
Q86V81	ALYREF	0.835299	0.47794	0.332706	0.416423			-0.259636	-1.10098		ALY BEF THOC4	THO complex subunit 4 OS=Homo sapiens OX=9606 GN=ALYREF PE=1 SV=3	0	48.131	44	7	286	7	257	26.9	11.15	117.93	7	0	2.7697	2.72462	2.55549	3.1003	3.23231	2.49609	2.35735	1.86268	2.17326
P34932	HSPA4	1.14847	0.216369	0.607618	0.735324			0.199709	0.556361		APG2	Heat shock 70 kDa protein 4 OS=Homo sapiens OX=9606 GN=HSPA4 PE=1 SV=4	0	48.054	17	11	175	10	840	94.3	5.19	64.66	11	0	0.43074	1.4034	0.650464	0.713921	0.933433	0.238124	0.474117	0.312858	0.770741
P07099	EPHX1	1.0705	0.112452	0.771876	0.87086			0.0982894	0.310232		EPHX EPOX	Epoxide hydrolase 1 OS=Homo sapiens OX=9606 GN=EPHX1 PE=1 SV=1	0	47.958	29	10	178	10	455	52.9	7.25	77.32	10	0	1.5601	2.53926	2.18363	1.80586	1.9228	2.25947	1.3091	1.56418	1.77637
Q8NI35	PATJ	1.35428	0.34916	0.447549	0.565279			0.437527	0.841272		CIPP INADL	InaD-like protein OS=Homo sapiens OX=9606 GN=PATJ PE=1 SV=3	0	47.937	10	14	112	14	1801	196.2	4.94	35.24	14	0	-1.68428	-1.86951	-0.691377	-2.532	-1.7656	-1.26014	-0.503795	0.195904	-0.853785
Q14161	GIT2	0.764246	1.20987	0.0616778	0.10092			-0.387892	-2.57461		KIAA0148	ARF GTPase-activating protein GIT2 OS=Homo sapiens OX=9606 GN=GIT2 PE=1 SV=2	0	47.862	21	13	126	10	759	84.5	7.23	41.95	13	2	0.916571	0.502443	0.844079	1.1371	1.28327	1.0064	1.06483	1.45052	0.895102
O15355	PPM1G	1.01004	0.0309311	0.931256	0.971101			0.0144137	0.09182		PPM1C	Protein phosphatase 1G OS=Homo sapiens OX=9606 GN=PPM1G PE=1 SV=1	0	47.796	26	10	187	10	546	59.2	4.36	81.6	10	0	0.77223	0.712886	1.13405	0.810723	1.02485	0.740358	1.77442	1.96334	1.68549
Q8WUA2	PPIL4	1.97511	2.90374	0.00124814	0.0146353	+	C33A_C93	0.98193	8.12482	+		Peptidyl-prolyl cis-trans isomerase-like 4 OS=Homo sapiens OX=9606 GN=PPIL4 PE=1 SV=1	0	47.578	24	11	198	11	492	57.2	5.92	86.77	11	0	2.14695	2.10736	2.24766	1.16234	1.0015	1.39233	2.87655	3.23143	2.72912
P49757	NUMB	2.23078	2.82415	0.00149916	0.0175165	+	C33A_C93	1.15755	7.74232	+	C14orf41	Protein numb homolog OS=Homo sapiens OX=9606 GN=NUMB PE=1 SV=2	0	47.483	20	11	175	10	651	70.8	8.51	66.75	11	1	1.36983	1.44296	1.29794	0.298852	-0.0675247	0.406747	1.07842	0.362232	0.793793
P42356	PI4KA	0.793743	1.20907	0.0617913	0.100731			-0.333255	-2.57287		PIK4 PIK4CA	Phosphatidylinositol 4-kinase alpha OS=Homo sapiens OX=9606 GN=PI4KA PE=1 SV=4	0	47.459	9	14	79	14	2102	236.7	7.06	20.42	14	0	-1.59628	-1.76472	-1.50938	-1.36847	-1.42101	-1.08111	-1.68927	-2.39397	-2.65008
P46782	RPS5	1.16841	1.57002	0.026914	0.0620516			0.224541	3.41458			Small ribosomal subunit protein uS7 OS=Homo sapiens OX=9606 GN=RPS5 PE=1 SV=4	0	47.28	53	9	228	9	204	22.9	9.72	114.84	9	0	3.72091	3.64293	3.7133	3.47615	3.5689	3.35845	4.13397	3.87254	4.17014
Q07955	SRSF1	1.01042	0.0876645	0.817213	0.905955			0.0149617	0.246798		ASF SF2 SF2P33 SFRS1	Serine/arginine-rich splicing factor 1 OS=Homo sapiens OX=9606 GN=SRSF1 PE=1 SV=2	0	47.277	38	10	449	9	248	27.7	10.36	223.35	10	1	4.94319	4.84341	4.95566	4.97787	4.80886	4.91064	4.79303	4.34723	4.542
O75691	UTP20	0.926809	0.195392	0.637688	0.767838			-0.109655	-0.508777		DRIM	Small subunit processome component 20 homolog OS=Homo sapiens OX=9606 GN=UTP20 PE=1 SV=3	0	47.275	6	13	93	13	2785	318.2	7.39	25.62	13	0	1.2606	0.586278	1.14408	1.0013	1.19289	1.12573	1.22816	0.0793248	1.0028
Q9UN37	VPS4A	0.67981	2.55626	0.00277806	0.0228367	+	C33A_C93	-0.556796	-6.56952	+	VPS4	Vacuolar protein sorting-associated protein 4A OS=Homo sapiens OX=9606 GN=VPS4A PE=1 SV=1	0	47.253	26	10	216	6	437	48.9	7.8	82.11	10	3	2.22393	2.16565	2.00359	2.7842	2.60026	2.67911	2.0675	2.02682	1.89143
Q9Y230	RUVBL2	1.06571	0.346235	0.450573	0.568261			0.0918178	0.835229		INO80J TIP48 TIP49B	RuvB-like 2 OS=Homo sapiens OX=9606 GN=RUVBL2 PE=1 SV=3	0	47.217	27	11	286	11	463	51.1	5.64	145.38	11	0	3.16927	3.02032	3.38356	3.15591	3.09335	3.04844	3.11075	2.9306	2.83087
P50993	ATP1A2	0.909105	0.19348	0.640502	0.769644			-0.137482	-0.504394		KIAA0778	Sodium/potassium-transporting ATPase subunit alpha-2 OS=Homo sapiens OX=9606 GN=ATP1A2 PE=1 SV=1	0	47.14	14	11	297	2	1020	112.2	5.66	140.37	11	0	1.31006	1.77893	1.71005	2.12359	1.76026	1.32764	1.78428	0.813866	1.13799
O75955	FLOT1	0.563079	2.34024	0.00456839	0.0254139	+	C33A_C93	-0.828591	-5.73856	+		Flotillin-1 OS=Homo sapiens OX=9606 GN=FLOT1 PE=1 SV=3	0	47.055	26	9	120	9	427	47.3	7.49	39.06	9	0	1.06971	1.22557	1.36151	2.04252	1.84703	2.25301	0.839464	0.100142	1.1953
P29401	TKT	1.06301	0.123335	0.752774	0.85543			0.0881519	0.337405			Transketolase OS=Homo sapiens OX=9606 GN=TKT PE=1 SV=3	0	47.025	25	11	79	11	623	67.8	7.66	22.4	11	0	2.07442	2.4542	1.76877	2.35122	1.84711	1.8346	1.65671	1.45454	1.85139
P22695	UQCRC2	1.10288	0.730901	0.185823	0.235269			0.141273	1.59554			Cytochrome b-c1 complex subunit 2, mitochondrial OS=Homo sapiens OX=9606 GN=UQCRC2 PE=1 SV=3	0	47.025	31	11	191	11	453	48.4	8.63	86.83	11	0	1.65711	1.69714	1.48754	1.55615	1.5078	1.35404	1.63136	1.65072	1.9967
P61313	RPL15	1.21789	1.86758	0.0135649	0.0377195	+	C33A_C93	0.284382	4.21195		EC45	Large ribosomal subunit protein eL15 OS=Homo sapiens OX=9606 GN=RPL15 PE=1 SV=2	0	47.017	48	11	639	11	204	24.1	11.62	353.3	11	0	6.49706	6.32741	6.33663	6.08748	6.04389	6.17659	6.55415	5.75141	6.27773
Q9ULG6	CCPG1	0.799589	1.14536	0.0715555	0.109759			-0.32267	-2.43549		CCP8 CPR8 KIAA1254	Cell cycle progression protein 1 OS=Homo sapiens OX=9606 GN=CCPG1 PE=1 SV=3	0	46.948	15	12	119	12	757	87.3	5.95	53.67	12	0	6.87244	6.49594	6.76996	7.14792	6.90654	7.05188	7.2082	6.54168	7.12186
P07355	ANXA2	1.47739	0.939074	0.11506	0.154862			0.563053	2.008		ANX2 ANX2L4 CAL1H LPC2D	Annexin A2 OS=Homo sapiens OX=9606 GN=ANXA2 PE=1 SV=2	0	46.825	29	9	133	9	339	38.6	7.75	54.88	9	0	2.14899	2.64534	2.46439	1.9458	2.22029	1.40346	1.54758	2.20035	1.78676
P31939	ATIC	0.990287	0.0178493	0.959734	0.979902			-0.0140821	-0.0537209		PURH	Bifunctional purine biosynthesis protein ATIC OS=Homo sapiens OX=9606 GN=ATIC PE=1 SV=3	0	46.812	27	11	188	11	592	64.6	6.71	64.79	11	0	1.12039	1.543	1.16129	1.39669	0.856819	1.61342	1.14089	0.673222	1.24817
P12235	SLC25A4	1.25635	0.553139	0.279809	0.347464			0.329235	1.24888		AAC1 ANT1	ADP/ATP translocase 1 OS=Homo sapiens OX=9606 GN=SLC25A4 PE=1 SV=4	0	46.779	44	11	355	3	298	33	9.76	176.59	11	0	-0.0213289	-0.160147	-0.100797	-0.943667	-0.139156	-0.187155	0.282475	0.0848044	0.183937
Q9Y6M7	SLC4A7	0.942651	0.178655	0.662743	0.785077			-0.0852049	-0.470139		BT NBC2 NBC2B NBC3 NBCn1 SBC2 SLC4A6	Sodium bicarbonate cotransporter 3 OS=Homo sapiens OX=9606 GN=SLC4A7 PE=1 SV=2	0	46.736	15	13	120	13	1214	136	6.71	40.41	13	0	0.577768	0.291349	0.0783532	0.202575	0.578968	0.421542	-0.244516	-1.17922	-0.453171
Q7RTP6	MICAL3	3.01603	0.528046	0.296452	0.368388			1.59265	1.19971		KIAA0819 KIAA1364	[F-actin]-monooxygenase MICAL3 OS=Homo sapiens OX=9606 GN=MICAL3 PE=1 SV=2	0	46.645	7	13	128	13	2002	224.2	5.55	40.83	13	0	4.00986	0.0233719	0.166135	-0.0720115	0.148704	-0.655281	-0.827964	0.0790383	0.356786
Q06210	GFPT1	0.818856	1.93085	0.0117261	0.0369152	+	C33A_C93	-0.288317	-4.39617		GFAT GFPT	Glutamine--fructose-6-phosphate aminotransferase [isomerizing] 1 OS=Homo sapiens OX=9606 GN=GFPT1 PE=1 SV=3	0	46.641	19	11	173	8	699	78.8	7.11	67.06	11	3	1.5878	1.49608	1.39518	1.81185	1.82014	1.71202	1.93751	1.54661	1.59647
P55011	SLC12A2	0.823745	0.789624	0.162321	0.207245			-0.27973	-1.71063		NKCC1	Solute carrier family 12 member 2 OS=Homo sapiens OX=9606 GN=SLC12A2 PE=1 SV=1	0	46.516	12	12	168	12	1212	131.4	6.4	70.09	12	0	1.2298	1.27016	0.827098	1.5094	1.4248	1.23205	1.32947	0.654314	1.01174
O60762	DPM1	1.17402	1.16581	0.0682639	0.106588			0.231453	2.47928			Dolichol-phosphate mannosyltransferase subunit 1 OS=Homo sapiens OX=9606 GN=DPM1 PE=1 SV=1	0	46.471	45	12	210	12	260	29.6	9.57	105.65	12	0	4.22818	4.08157	3.92347	3.78521	3.88801	3.86564	3.75998	3.55938	3.68434
Q8TDD1	DDX54	0.892955	0.216571	0.607336	0.735516			-0.163341	-0.556815			ATP-dependent RNA helicase DDX54 OS=Homo sapiens OX=9606 GN=DDX54 PE=1 SV=2	0	46.467	19	13	122	13	881	98.5	10.02	47.94	13	0	-0.427857	-0.0094625	-1.00428	-0.36888	-0.209733	-0.372963	-0.598375	-0.710045	-0.839689
P61224	RAP1B	0.729026	1.78958	0.0162338	0.0434824	+	C33A_C93	-0.455958	-3.9923	+		Ras-related protein Rap-1b OS=Homo sapiens OX=9606 GN=RAP1B PE=1 SV=1	0	46.462	57	10	279	1	184	20.8	5.78	139.56	10	6	2.91332	2.82383	2.78819	3.18852	3.19101	3.51368	2.98685	2.49657	3.00435
Q53GQ0	HSD17B12	0.833664	0.948825	0.112506	0.152365			-0.262462	-2.02771		SDR12C1	Very-long-chain 3-oxoacyl-CoA reductase OS=Homo sapiens OX=9606 GN=HSD17B12 PE=1 SV=2	0	46.453	26	10	184	10	312	34.3	9.32	77.55	10	0	2.26356	2.04855	2.07265	2.24869	2.31594	2.60753	2.25865	1.92929	2.09361
Q9HAN9	NMNAT1	1.37596	0.507294	0.310961	0.385853			0.460442	1.15892		NMNAT	Nicotinamide/nicotinic acid mononucleotide adenylyltransferase 1 OS=Homo sapiens OX=9606 GN=NMNAT1 PE=1 SV=1	0	46.387	40	11	147	11	279	31.9	8.87	62.38	11	0	2.67929	2.03963	3.10181	1.72659	2.12117	2.59165	0.124696	-0.0101213	0.0974821
Q9H0U9	TSPYL1	0.995983	0.00402661	0.990771	0.994705			-0.00580694	-0.0123054		TSPYL	Testis-specific Y-encoded-like protein 1 OS=Homo sapiens OX=9606 GN=TSPYL1 PE=1 SV=3	0	46.374	32	10	98	10	437	49.2	5.45	30.34	10	0	0.854698	1.80454	1.42556	1.78812	0.603242	1.71086	1.68155	1.3956	1.59204
P04439	HLA-A	0.706554	1.46427	0.0343344	0.0685424			-0.501129	-3.15543		HLAA	HLA class I histocompatibility antigen, A alpha chain OS=Homo sapiens OX=9606 GN=HLA-A PE=1 SV=2	0	46.325	37	9	381	2	365	40.8	6	168.17	9	2	4.03786	3.9154	3.68863	4.53405	4.14168	4.46956	4.09745	3.51636	4.02501
O00629	KPNA4	0.835249	0.497794	0.317838	0.396266			-0.259721	-1.1402		QIP1	Importin subunit alpha-3 OS=Homo sapiens OX=9606 GN=KPNA4 PE=1 SV=1	0	46.245	31	10	132	7	521	57.9	4.96	58.66	10	2	1.22676	1.67604	1.43806	1.33774	1.94638	1.8359	1.1131	1.25408	1.6762
O00410	IPO5	1.0677	0.18067	0.659676	0.782674			0.0945029	0.474824		KPNB3 RANBP5	Importin-5 OS=Homo sapiens OX=9606 GN=IPO5 PE=1 SV=4	0	46.239	16	11	123	11	1097	123.6	4.94	51.86	11	0	0.878729	1.01891	0.939943	0.462226	1.02782	1.06403	1.10911	0.993791	1.12411
P62191	PSMC1	0.94508	0.657283	0.220149	0.275541			-0.081491	-1.45197			26S proteasome regulatory subunit 4 OS=Homo sapiens OX=9606 GN=PSMC1 PE=1 SV=1	0	46.234	29	11	279	11	440	49.2	6.21	108.57	11	0	2.40492	2.54418	2.45372	2.5921	2.583	2.47219	2.71502	2.1213	2.86744
Q9H307	PNN	0.814203	1.05587	0.0879292	0.128152			-0.29654	-2.24708		DRS MEMA	Pinin OS=Homo sapiens OX=9606 GN=PNN PE=1 SV=5	0	46.233	20	13	132	13	717	81.6	7.14	38.16	13	0	1.14852	1.09231	1.26052	1.60211	1.56918	1.21969	1.07204	0.806498	0.838581
Q9Y5Q8	GTF3C5	1.27239	1.86327	0.0137003	0.0379096	+	C33A_C93	0.347538	4.19959			General transcription factor 3C polypeptide 5 OS=Homo sapiens OX=9606 GN=GTF3C5 PE=1 SV=2	0	46.146	23	11	177	11	519	59.5	6.9	73.56	11	0	1.26925	1.2034	1.40765	0.938708	1.04766	0.851314	1.41306	2.00799	1.65243
Q9H7N4	SCAF1	0.631127	0.707563	0.196082	0.247418			-0.663997	-1.54997		SFRS19 SRA1	Splicing factor, arginine/serine-rich 19 OS=Homo sapiens OX=9606 GN=SCAF1 PE=1 SV=3	0	46.054	13	10	78	10	1312	139.2	9.25	24.97	10	0	-0.436287	-1.46582	-0.916045	-0.00400393	-0.890593	0.068432	-0.471091	-0.477497	-0.960054
Q13123	IK	1.48125	2.4164	0.00383356	0.0230033	+	C33A_C93	0.566815	6.02081	+	RED RER	Protein Red OS=Homo sapiens OX=9606 GN=IK PE=1 SV=3	0	46.009	21	11	180	11	557	65.6	6.64	84.81	11	0	1.41799	1.44264	1.33709	0.782714	1.00454	0.710018	1.78731	1.89777	1.85299
P06748	NPM1	1.50222	2.53185	0.00293865	0.0229119	+	C33A_C93	0.587098	6.47082	+	NPM	Nucleophosmin OS=Homo sapiens OX=9606 GN=NPM1 PE=1 SV=2	0	45.949	27	8	260	8	294	32.6	4.78	131.29	8	0	5.44656	5.2579	5.50284	4.79473	4.73665	4.91462	5.49023	4.97345	5.47874
P62834	RAP1A	1.44108	0.218555	0.604568	0.732235			0.527148	0.56127		KREV1	Ras-related protein Rap-1A OS=Homo sapiens OX=9606 GN=RAP1A PE=1 SV=1	0	45.947	57	10	280	1	184	21	6.67	134.79	10	0	-2.00498	-1.61604	-2.30279	-4.33078	-1.72402	-1.45046	-2.2966	-2.34744	-1.97202
P50990	CCT8	1.00419	0.0136954	0.968957	0.986521			0.00603251	0.0414052		C21orf112 CCTQ KIAA0002	T-complex protein 1 subunit theta OS=Homo sapiens OX=9606 GN=CCT8 PE=1 SV=4	0	45.936	24	11	228	11	548	59.6	5.6	96.68	11	0	1.93403	2.08028	2.07987	1.76962	2.23993	2.06653	1.54883	1.74798	1.90562
Q7L0Y3	TRMT10C	0.820125	0.628065	0.23547	0.292826			-0.286084	-1.39507		MRPP1 RG9MTD1	tRNA methyltransferase 10 homolog C OS=Homo sapiens OX=9606 GN=TRMT10C PE=1 SV=2	0	45.868	32	10	117	10	403	47.3	9.36	55.65	10	0	1.34767	1.27118	0.80703	1.23022	1.63284	1.42108	1.02002	1.32624	1.12085
Q5QJE6	DNTTIP2	3.53875	1.88534	0.0130214	0.0367514	+	C33A_C93	1.82324	4.26311	+	ERBP TDIF2	Deoxynucleotidyltransferase terminal-interacting protein 2 OS=Homo sapiens OX=9606 GN=DNTTIP2 PE=1 SV=2	0	45.789	21	11	114	11	756	84.4	6.16	40.18	11	0	0.957924	0.743985	0.992734	-0.52627	-0.483051	-1.76575	0.760926	0.667754	0.577141
Q8TEQ6	GEMIN5	2.686	1.06756	0.0855934	0.125916			1.42546	2.27142			Gem-associated protein 5 OS=Homo sapiens OX=9606 GN=GEMIN5 PE=1 SV=3	0	45.743	12	13	70	13	1508	168.5	6.62	24.94	13	0	-0.779374	-1.03074	-0.958495	-1.74389	-1.70675	-3.59435	-2.73973	-2.90466	-1.81275
Q96SB4	SRPK1	1.37216	1.42654	0.0374505	0.0694302			0.456447	3.06568			SRSF protein kinase 1 OS=Homo sapiens OX=9606 GN=SRPK1 PE=1 SV=2	0	45.616	22	11	116	10	655	74.3	6.16	49.34	11	0	1.08831	1.04876	1.5038	0.786306	0.694391	0.790825	0.946223	0.938676	0.961688
P09429	HMGB1	0.937255	0.175259	0.667945	0.788475			-0.093486	-0.462222		HMG1	High mobility group protein B1 OS=Homo sapiens OX=9606 GN=HMGB1 PE=1 SV=3	0	45.611	35	8	260	6	215	24.9	5.74	108.19	8	1	2.72369	2.48291	2.89403	3.0692	2.80801	2.50388	2.03865	2.1597	2.18593
O43290	SART1	1.55144	1.02598	0.0941941	0.134457			0.633607	2.18521			U4/U6.U5 tri-snRNP-associated protein 1 OS=Homo sapiens OX=9606 GN=SART1 PE=1 SV=1	0	45.38	18	12	131	12	800	90.2	6.13	47.84	12	0	-0.00222472	-0.0619592	0.277533	-1.10021	-0.24349	-0.343776	0.0406641	0.301391	0.0982851
P21359	NF1	1.86012	0.836399	0.145747	0.186989			0.895397	1.80289			Neurofibromin OS=Homo sapiens OX=9606 GN=NF1 PE=1 SV=2	0	45.347	7	15	82	15	2839	319.2	7.39	20.39	15	0	-2.43697	-0.918403	-2.28425	-2.8053	-2.96062	-2.5599	-0.407666	0.0994961	-2.05541
P62266	RPS23	1.57672	3.56734	0.000270807	0.0153239	+	C33A_C93	0.656926	12.0632	+		Small ribosomal subunit protein uS12 OS=Homo sapiens OX=9606 GN=RPS23 PE=1 SV=3	0	45.306	50	6	437	6	143	15.8	10.49	183.67	6	0	5.88046	5.82911	5.71572	5.1839	5.10362	5.16699	5.96904	5.24115	5.8394
Q96CW5	TUBGCP3	0.966203	0.0570328	0.876935	0.941712			-0.0496024	-0.165017		GCP3	Gamma-tubulin complex component 3 OS=Homo sapiens OX=9606 GN=TUBGCP3 PE=1 SV=2	0	45.299	20	12	114	12	907	103.5	8.12	43.33	12	0	-0.760727	-0.278382	0.273211	-0.170978	-0.273085	-0.173029	-0.219944	-0.240687	-0.260641
P61254	RPL26	1.18244	0.992681	0.1017	0.143853			0.241761	2.11687			Large ribosomal subunit protein uL24 OS=Homo sapiens OX=9606 GN=RPL26 PE=1 SV=1	0	45.283	52	11	627	3	145	17.2	10.55	299.87	11	7	6.39385	6.18248	6.16041	6.1381	5.84183	6.03153	6.52764	5.57013	6.05914
Q7L7X3	TAOK1	0.968366	0.106164	0.783134	0.880642			-0.0463761	-0.29435		KIAA1361 MAP3K16 MARKK	Serine/threonine-protein kinase TAO1 OS=Homo sapiens OX=9606 GN=TAOK1 PE=1 SV=1	0	45.268	17	13	103	11	1001	116	7.65	31.25	13	0	-0.436128	-0.106345	-0.206788	-0.159002	-0.436324	-0.0148062	-0.217454	-0.882273	0.0629875
Q32P51	HNRNPA1L2	1.72359	3.04327	0.000905172	0.0152464	+	C33A_C93	0.785413	8.83703	+	HNRNPA1L	Heterogeneous nuclear ribonucleoprotein A1-like 2 OS=Homo sapiens OX=9606 GN=HNRNPA1L2 PE=2 SV=2	0	45.246	33	8	198	7	320	34.2	9	90.79	8	0	2.88494	3.14772	3.11785	2.31642	2.27048	2.20737	3.02378	2.5507	2.75124
O60313	OPA1	0.764015	2.70343	0.00197959	0.0192558	+	C33A_C93	-0.388327	-7.19278	+	KIAA0567	Dynamin-like 120 kDa protein, mitochondrial OS=Homo sapiens OX=9606 GN=OPA1 PE=1 SV=3	0	45.205	15	13	116	13	960	111.6	7.87	41.58	13	0	0.520229	0.449721	0.337224	0.807104	0.835551	0.8295	0.022462	-0.118893	0.150875
O43865	AHCYL1	0.43426	0.862657	0.137196	0.179462			-1.20337	-1.85498		DCAL IRBIT XPVKONA	S-adenosylhomocysteine hydrolase-like protein 1 OS=Homo sapiens OX=9606 GN=AHCYL1 PE=1 SV=2	0	45.139	26	12	104	2	530	58.9	6.89	34.02	12	4	-0.263289	-0.303786	-2.21582	0.417635	0.155297	0.254279	-0.911513	0.209114	-1.43667
P61981	YWHAG	1.134	0.0953437	0.80289	0.895386			0.181424	0.266692			14-3-3 protein gamma OS=Homo sapiens OX=9606 GN=YWHAG PE=1 SV=2	0	45.129	44	9	147	7	247	28.3	4.89	74.67	9	0	1.43073	1.23968	0.619118	0.549401	2.15053	0.0453159	0.0953438	-0.362472	-0.279684
P61421	ATP6V0D1	0.328366	3.95507	0.000110901	0.00822222	+	C33A_C93	-1.60662	-15.1417	+	ATP6D VPATPD	V-type proton ATPase subunit d 1 OS=Homo sapiens OX=9606 GN=ATP6V0D1 PE=1 SV=1	0	45.119	33	12	152	12	351	40.3	5	70.45	12	0	1.41672	1.25355	1.07482	2.80386	2.82986	2.93125	1.17267	0.486852	1.20072
Q86YQ8	CPNE8	1.12364	0.284631	0.519241	0.646852			0.168184	0.705813			Copine-8 OS=Homo sapiens OX=9606 GN=CPNE8 PE=1 SV=2	0	45.093	26	11	158	11	564	63.1	5.96	55.8	11	0	1.37578	1.79319	1.36535	1.58151	1.48528	0.962979	0.403669	-0.263207	0.707411
Q9H9T3	ELP3	1.80152	3.14586	0.000714734	0.0155966	+	C33A_C93	0.849215	9.39674	+		Elongator complex protein 3 OS=Homo sapiens OX=9606 GN=ELP3 PE=1 SV=2	0	44.963	24	12	182	12	547	62.2	8.88	87.69	12	0	1.11996	1.23974	1.0669	0.193623	0.246445	0.438885	1.45085	0.957346	1.36653
Q14254	FLOT2	0.539994	1.49794	0.031773	0.066512			-0.888983	-3.2367	+	ESA1 M17S1	Flotillin-2 OS=Homo sapiens OX=9606 GN=FLOT2 PE=1 SV=2	0	44.926	29	11	165	11	428	47	5.25	71.43	11	0	0.794045	1.22673	1.66425	1.89626	2.20939	2.24633	0.975502	0.963685	1.52745
Q9NX63	CHCHD3	0.54768	2.78409	0.00164403	0.0178429	+	C33A_C93	-0.868595	-7.55596	+	MIC19 MINOS3	MICOS complex subunit MIC19 OS=Homo sapiens OX=9606 GN=CHCHD3 PE=1 SV=1	0	44.917	40	10	142	10	227	26.1	8.28	65.88	10	0	1.89624	1.78764	1.66336	2.77264	2.46784	2.71254	1.93806	1.31709	1.54092
P35268	RPL22	1.3835	2.03425	0.00924164	0.032105	+	C33A_C93	0.468324	4.70971	+		Large ribosomal subunit protein eL22 OS=Homo sapiens OX=9606 GN=RPL22 PE=1 SV=2	0	44.852	59	6	355	5	128	14.8	9.19	199.62	6	1	6.63146	6.4874	6.53378	6.13361	5.90769	6.20636	6.46747	5.83936	6.23093
Q9ULT8	HECTD1	1.29164	0.668359	0.214606	0.27022			0.369203	1.47354		KIAA1131	E3 ubiquitin-protein ligase HECTD1 OS=Homo sapiens OX=9606 GN=HECTD1 PE=1 SV=4	0	44.847	6	14	101	14	2610	289.2	5.35	31.99	14	0	0.25631	0.302867	0.577774	-0.445583	0.288806	0.186116	0.398518	0.776919	0.0193116
Q96CW1	AP2M1	1.12941	1.06865	0.0853797	0.126006			0.175567	2.27368		CLAPM1 KIAA0109	AP-2 complex subunit mu OS=Homo sapiens OX=9606 GN=AP2M1 PE=1 SV=2	0	44.837	28	11	241	11	435	49.6	9.54	144.31	11	0	2.78803	2.66788	2.87154	2.67283	2.50518	2.62274	2.88748	2.32454	2.58561
Q9UNQ2	DIMT1	1.74629	1.4344	0.0367788	0.0691949			0.804296	3.08426	+	DIMT1L	Probable dimethyladenosine transferase OS=Homo sapiens OX=9606 GN=DIMT1 PE=1 SV=1	0	44.805	43	11	184	11	313	35.2	9.99	75.55	11	0	1.59083	1.54277	1.54984	1.00911	0.236245	1.0252	1.66643	1.26813	1.15201
Q5T6F2	UBAP2	2.30137	1.68178	0.0208075	0.0504878			1.20249	3.70153	+	KIAA1491	Ubiquitin-associated protein 2 OS=Homo sapiens OX=9606 GN=UBAP2 PE=1 SV=1	0	44.799	15	10	105	10	1119	117	7.34	39.68	10	0	-0.398953	-0.32441	0.387605	-0.984049	-1.69458	-1.2646	1.53067	2.27345	1.10253
Q9NUL7	DDX28	1.23838	0.781443	0.165408	0.210681			0.308454	1.69455		MDDX28	Probable ATP-dependent RNA helicase DDX28 OS=Homo sapiens OX=9606 GN=DDX28 PE=1 SV=2	0	44.778	25	9	188	9	540	59.5	10.42	73.34	9	0	2.60373	2.46749	2.29408	2.04829	1.93494	2.45671	1.96756	1.68405	2.18003
P10398	ARAF	0.983078	0.0285999	0.936268	0.972832			-0.0246216	-0.0851043		ARAF1 PKS PKS2	Serine/threonine-protein kinase A-Raf OS=Homo sapiens OX=9606 GN=ARAF PE=1 SV=2	0	44.776	20	10	142	7	606	67.5	9.01	61.29	10	0	0.183903	-0.172782	0.501181	0.000101103	0.622902	-0.0368357	-0.180985	-0.733957	-0.114094
Q86V48	LUZP1	0.94454	0.148224	0.710847	0.820411			-0.0823155	-0.398163			Leucine zipper protein 1 OS=Homo sapiens OX=9606 GN=LUZP1 PE=1 SV=2	0	44.731	13	12	111	12	1076	120.2	8.5	33.31	12	0	-0.639361	-0.312343	-0.277168	-0.65802	-0.24133	-0.0825748	0.338146	-0.610283	-0.75898
O60306	AQR	1.05171	0.0363413	0.919727	0.965101			0.072735	0.107288		KIAA0560	RNA helicase aquarius OS=Homo sapiens OX=9606 GN=AQR PE=1 SV=4	0	44.628	9	11	93	11	1485	171.2	6.37	23.53	11	0	-2.30478	-0.81847	-0.631243	-2.15746	-0.776096	-1.03914	-0.998418	-1.75392	-1.57212
Q6Y7W6	GIGYF2	2.25758	3.11263	0.000771568	0.01584	+	C33A_C93	1.17477	9.21195	+	KIAA0642 PERQ2 TNRC15	GRB10-interacting GYF protein 2 OS=Homo sapiens OX=9606 GN=GIGYF2 PE=1 SV=1	0	44.605	10	11	186	11	1299	150	5.54	77.27	11	0	1.95785	1.82329	2.12176	0.936044	0.826481	0.616052	2.64061	2.88998	2.40958
Q13247	SRSF6	1.51738	2.12112	0.00756632	0.0301301	+	C33A_C93	0.60158	4.98577	+	SFRS6 SRP55	Serine/arginine-rich splicing factor 6 OS=Homo sapiens OX=9606 GN=SRSF6 PE=1 SV=2	0	44.54	27	11	265	8	344	39.6	11.43	108.29	11	2	2.72019	2.74618	2.93285	2.39888	2.09694	2.09866	2.60772	2.64913	2.63164
P48643	CCT5	0.986581	0.0388644	0.914399	0.961474			-0.0194912	-0.114446		CCTE KIAA0098	T-complex protein 1 subunit epsilon OS=Homo sapiens OX=9606 GN=CCT5 PE=1 SV=1	0	44.511	20	10	132	10	541	59.6	5.66	55.45	10	0	1.48449	1.192	1.54417	1.34624	1.2504	1.6825	1.78591	0.927753	1.43027
Q08379	GOLGA2	1.71268	1.00944	0.0978496	0.139649			0.776257	2.1512			Golgin subfamily A member 2 OS=Homo sapiens OX=9606 GN=GOLGA2 PE=1 SV=3	0	44.456	13	11	160	11	1002	113	5.02	71.67	11	0	0.627354	0.975681	0.808364	0.473996	0.26344	-0.654809	0.726441	-0.00109714	0.0111332
Q9H814	PHAX	1.28927	1.31223	0.0487271	0.0826464			0.366553	2.8017		RNUXA	Phosphorylated adapter RNA export protein OS=Homo sapiens OX=9606 GN=PHAX PE=1 SV=1	0	44.376	28	11	125	11	394	44.4	5.4	58.98	11	0	1.60911	1.51914	1.91074	1.25844	1.42435	1.25654	1.87583	2.19953	1.99442
P33992	MCM5	0.828124	1.20016	0.0630724	0.101115			-0.272081	-2.55348		CDC46	DNA replication licensing factor MCM5 OS=Homo sapiens OX=9606 GN=MCM5 PE=1 SV=5	0	44.312	20	11	185	11	734	82.2	8.37	82.05	11	0	2.06171	2.03211	2.11999	2.54515	2.28143	2.20348	2.26579	2.18426	2.03102
P02768	ALB	1.06164	0.220332	0.602099	0.730399			0.0862931	0.565254			Albumin OS=Homo sapiens OX=9606 GN=ALB PE=1 SV=2	0	44.102	12	9	139	9	609	69.3	6.28	71.25	9	0	4.63111	4.66469	5.04336	4.56266	4.69042	4.82721	6.16636	6.33849	6.09047
P15121	AKR1B1	0.854188	0.860165	0.137986	0.18059			-0.227374	-1.85002		ALDR1 ALR2	Aldo-keto reductase family 1 member B1 OS=Homo sapiens OX=9606 GN=AKR1B1 PE=1 SV=3	0	43.986	48	11	249	11	316	35.8	6.98	105.6	11	0	4.10356	4.28373	4.00277	4.23459	4.30156	4.53604	4.38101	3.87497	4.14801
Q96EB6	SIRT1	0.722002	2.84565	0.00142675	0.0162873	+	C33A_C93	-0.469926	-7.84402	+	SIR2L1	NAD-dependent protein deacetylase sirtuin-1 OS=Homo sapiens OX=9606 GN=SIRT1 PE=1 SV=2	0	43.865	18	10	100	10	747	81.6	4.67	24.26	10	0	3.47549	3.45678	3.45347	3.86526	3.87968	4.05058	3.74238	3.02133	3.49089
Q58FF8	HSP90AB2P	0.929481	0.226491	0.59362	0.721694			-0.105503	-0.579016		HSP90BB	Putative heat shock protein HSP 90-beta 2 OS=Homo sapiens OX=9606 GN=HSP90AB2P PE=1 SV=2	0	43.836	17	10	319	2	381	44.3	4.84	158.21	10	0	2.3182	2.55325	2.61899	2.29807	2.68252	2.82636	2.73046	2.32344	2.55304
Q9NXF1	TEX10	0.820061	0.208059	0.619356	0.746871			-0.286197	-0.537618			Testis-expressed protein 10 OS=Homo sapiens OX=9606 GN=TEX10 PE=1 SV=2	0	43.821	15	13	106	13	929	105.6	9.36	30.89	13	0	-1.0635	-1.29272	0.238831	-0.801113	-0.470964	0.0132758	-0.287895	-0.384542	-0.185644
P62277	RPS13	0.830638	0.79722	0.159507	0.203357			-0.267709	-1.72557			Small ribosomal subunit protein uS15 OS=Homo sapiens OX=9606 GN=RPS13 PE=1 SV=2	0	43.82	40	8	428	8	151	17.2	10.54	190.93	8	0	6.84256	6.54637	6.55412	6.98787	6.67973	7.07857	6.82654	5.90343	6.56933
P35241	RDX	1.29913	0.497043	0.318388	0.396421			0.377542	1.13872			Radixin OS=Homo sapiens OX=9606 GN=RDX PE=1 SV=1	0	43.812	15	11	225	4	583	68.5	6.37	111.68	11	0	-0.0458738	0.974364	0.362022	-0.157579	-0.0237271	0.339193	0.530925	0.660882	0.253306
P60842	EIF4A1	0.967226	0.152913	0.703212	0.81541			-0.048075	-0.409412		DDX2A EIF4A	Eukaryotic initiation factor 4A-I OS=Homo sapiens OX=9606 GN=EIF4A1 PE=1 SV=1	0	43.728	31	10	272	4	406	46.1	5.48	150.65	10	3	2.86582	2.86554	3.03091	2.7922	2.96298	3.15131	3.05237	2.78197	3.10413
O94874	UFL1	1.17567	2.36122	0.00435287	0.022383	+	C33A_C93	0.233485	5.81522		KIAA0776 MAXER NLBP RCAD	E3 UFM1-protein ligase 1 OS=Homo sapiens OX=9606 GN=UFL1 PE=1 SV=2	0	43.688	18	12	143	12	794	89.5	6.79	53.42	12	0	2.02497	2.05907	2.00168	1.76791	1.8674	1.74995	2.24298	1.97583	2.03683
Q13155	AIMP2	1.19283	0.912502	0.12232	0.162568			0.254383	1.95453		JTV1	Aminoacyl tRNA synthase complex-interacting multifunctional protein 2 OS=Homo sapiens OX=9606 GN=AIMP2 PE=1 SV=2	0	43.68	31	8	236	8	320	35.3	8.22	78.39	8	0	2.15679	1.99316	2.00759	2.0267	1.62531	1.74237	2.70679	2.52923	2.50803
P04181	OAT	1.04852	0.117912	0.762234	0.862671			0.0683589	0.323912			Ornithine aminotransferase, mitochondrial OS=Homo sapiens OX=9606 GN=OAT PE=1 SV=1	0	43.676	26	8	146	8	439	48.5	7.03	55.42	8	0	0.443464	0.567474	0.425297	0.0387073	0.751207	0.441244	0.422128	0.83032	0.213275
P19367	HK1	0.683292	1.14508	0.0716011	0.109664			-0.549425	-2.4349			Hexokinase-1 OS=Homo sapiens OX=9606 GN=HK1 PE=1 SV=3	0	43.585	15	11	105	10	917	102.4	6.8	44.9	11	0	-0.286451	0.331331	0.209571	0.430124	0.616245	0.856358	-0.0818744	-0.159364	-0.200521
Q16531	DDB1	0.800808	1.44614	0.0357983	0.0692151			-0.320473	-3.11212		XAP1	DNA damage-binding protein 1 OS=Homo sapiens OX=9606 GN=DDB1 PE=1 SV=1	0	43.544	11	11	127	11	1140	126.9	5.26	30.94	11	0	0.149794	-0.125011	0.154032	0.293009	0.447265	0.399958	0.114792	-0.0673054	-0.28425
P00966	ASS1	1.10397	0.551543	0.280839	0.347851			0.142701	1.24576		ASS	Argininosuccinate synthase OS=Homo sapiens OX=9606 GN=ASS1 PE=1 SV=2	0	43.531	25	10	208	10	412	46.5	8.02	103.7	10	0	2.63214	2.93455	2.60837	2.63263	2.49086	2.62347	2.61192	2.39785	2.62841
O75694	NUP155	0.768758	0.511967	0.307633	0.382655			-0.379399	-1.16812		KIAA0791	Nuclear pore complex protein Nup155 OS=Homo sapiens OX=9606 GN=NUP155 PE=1 SV=1	0	43.495	11	12	117	12	1391	155.1	6.16	42.83	12	0	-0.862916	-0.213317	0.248061	0.0621938	0.18462	0.0632106	-0.29134	-0.158052	0.0217457
P29597	TYK2	1.04448	0.183271	0.655737	0.778718			0.0627786	0.480858			Non-receptor tyrosine-protein kinase TYK2 OS=Homo sapiens OX=9606 GN=TYK2 PE=1 SV=3	0	43.468	12	11	116	9	1187	133.6	7.15	29.99	11	0	-1.80121	-1.83112	-1.79672	-1.98881	-1.61271	-2.01586	-1.08235	-3.91159	-2.11686
O75746	SLC25A12	1.33456	0.912119	0.122428	0.162739			0.416365	1.95376		AGC1 ARALAR1	Electrogenic aspartate/glutamate antiporter SLC25A12, mitochondrial OS=Homo sapiens OX=9606 GN=SLC25A12 PE=1 SV=2	0	43.449	21	13	167	8	678	74.7	8.38	84.07	13	0	0.0983295	0.0881312	0.216893	-0.106759	-0.6983	-0.0406839	0.185931	0.322695	0.436922
Q8IVT2	MISP	2.73293	1.55857	0.0276334	0.0629987			1.45045	3.38594	+	C19orf21	Mitotic interactor and substrate of PLK1 OS=Homo sapiens OX=9606 GN=MISP PE=1 SV=1	0	43.434	18	9	104	9	679	75.3	6.83	30.75	9	0	-0.581486	-0.554896	-0.789032	-1.34495	-2.12644	-2.80536	-0.0100038	0.506901	-0.137524
Q8WXX5	DNAJC9	4.41571	2.78356	0.00164603	0.01775	+	C33A_C93	2.14264	7.55353	+		DnaJ homolog subfamily C member 9 OS=Homo sapiens OX=9606 GN=DNAJC9 PE=1 SV=1	0	43.423	37	9	146	9	260	29.9	5.73	70.11	9	0	2.28329	2.0278	1.96975	-0.504252	0.419713	-0.0625607	1.84183	1.22686	1.8099
Q08AF3	SLFN5	1.08124	0.303616	0.497032	0.617805			0.11268	0.746167			Schlafen family member 5 OS=Homo sapiens OX=9606 GN=SLFN5 PE=1 SV=1	0	43.422	16	9	123	9	891	101	8.22	36.19	9	0	0.886835	0.878163	0.778915	0.616105	1.02762	0.562149	-0.198514	-0.458913	-0.930193
Q12899	TRIM26	1.18265	0.651067	0.223323	0.277634			0.242027	1.43987		RNF95 ZNF173	Tripartite motif-containing protein 26 OS=Homo sapiens OX=9606 GN=TRIM26 PE=1 SV=1	0	43.404	23	11	173	11	539	62.1	5.03	73.17	11	0	1.62858	1.44741	1.50097	0.981742	1.34654	1.5226	1.60287	1.71364	1.3888
Q8NI27	THOC2	0.833701	1.17932	0.0661733	0.104029			-0.262398	-2.50836		CXorf3	THO complex subunit 2 OS=Homo sapiens OX=9606 GN=THOC2 PE=1 SV=2	0	43.388	9	13	130	13	1593	182.7	8.44	50.2	13	0	0.840166	0.590288	0.863701	1.00498	1.13567	0.940698	0.999386	0.735414	0.843964
Q8TD19	NEK9	0.92516	0.14151	0.721921	0.833282			-0.112225	-0.381953		KIAA1995 NEK8 NERCC	Serine/threonine-protein kinase Nek9 OS=Homo sapiens OX=9606 GN=NEK9 PE=1 SV=2	0	43.361	15	11	129	11	979	107.1	5.74	37.65	11	0	-0.269522	-0.125825	0.1028	0.211174	0.357816	-0.524864	-0.287442	0.31679	-0.0369167
O14974	PPP1R12A	1.39247	0.122949	0.753445	0.855917			0.477649	0.336446		MBS MYPT1	Protein phosphatase 1 regulatory subunit 12A OS=Homo sapiens OX=9606 GN=PPP1R12A PE=1 SV=1	0	43.317	15	12	46	12	1030	115.2	5.4	12	12	0	-4.34475	-0.8303	-2.08301	-1.88759	-4.85419	-1.94922	-1.38495	-0.829846	-1.45659
Q9UMS4	PRPF19	1.12688	1.35413	0.0442461	0.0789894			0.172334	2.89711		NMP200 PRP19 SNEV	Pre-mRNA-processing factor 19 OS=Homo sapiens OX=9606 GN=PRPF19 PE=1 SV=1	0	43.304	31	10	165	10	504	55.1	6.61	55.04	10	0	2.34715	2.21187	2.36238	2.15758	2.18139	2.06542	2.16512	1.55916	1.90246
Q6ZVM7	TOM1L2	1.21096	1.01072	0.0975628	0.139363			0.276147	2.15382			TOM1-like protein 2 OS=Homo sapiens OX=9606 GN=TOM1L2 PE=1 SV=1	0	43.3	23	9	141	9	507	55.5	4.79	63.88	9	0	2.5103	2.22225	2.07365	1.99601	1.99524	1.98652	1.65035	-0.652652	0.84811
Q86UU1	PHLDB1	1.6192	0.196856	0.635541	0.76489			0.695278	0.512128		KIAA0638 LL5A	Pleckstrin homology-like domain family B member 1 OS=Homo sapiens OX=9606 GN=PHLDB1 PE=1 SV=1	0	43.255	11	13	85	13	1377	151.1	8.63	27.07	13	0	-4.73792	-1.47027	-1.0319	-2.2226	-2.63518	-4.46814	-0.210397	0.61982	-1.11022
Q6P158	DHX57	1.15743	0.169125	0.677446	0.796802			0.210929	0.447851			Putative ATP-dependent RNA helicase DHX57 OS=Homo sapiens OX=9606 GN=DHX57 PE=1 SV=2	0	43.149	12	14	112	13	1386	155.5	7.71	40.69	14	0	-3.0286	-2.55823	-3.12867	-3.97919	-2.56625	-2.80286	-2.99935	-1.70503	-4.22652
Q8IY81	FTSJ3	2.84668	0.928243	0.117966	0.157713			1.50928	1.98617			pre-rRNA 2'-O-ribose RNA methyltransferase FTSJ3 OS=Homo sapiens OX=9606 GN=FTSJ3 PE=1 SV=2	0	43.13	16	10	163	10	847	96.5	8.4	68.16	10	0	2.37696	2.08479	0.00140909	0.0610989	0.158505	-0.28429	0.332532	1.10303	0.294631
Q9UBX3	SLC25A10	1.645	2.39507	0.00402649	0.0225696	+	C33A_C93	0.718091	5.94065	+	DIC	Mitochondrial dicarboxylate carrier OS=Homo sapiens OX=9606 GN=SLC25A10 PE=1 SV=2	0	43.055	40	9	165	9	287	31.3	9.54	76.25	9	0	2.38502	2.21009	2.25312	1.34729	1.68289	1.66378	2.16644	2.05071	2.15204
O00139	KIF2A	1.02208	0.100218	0.793929	0.887677			0.0315021	0.279205		KIF2 KNS2	Kinesin-like protein KIF2A OS=Homo sapiens OX=9606 GN=KIF2A PE=1 SV=3	0	42.991	17	12	214	11	706	79.9	6.68	106.96	12	0	1.96905	1.90891	2.15792	1.96845	2.13207	1.84086	1.70371	1.55151	1.84233
P11498	PC	0.689337	0.983818	0.103796	0.145249			-0.536718	-2.09878			Pyruvate carboxylase, mitochondrial OS=Homo sapiens OX=9606 GN=PC PE=1 SV=2	0	42.983	12	11	124	11	1178	129.6	6.84	48.47	11	0	0.366142	0.595125	-0.260449	0.770904	0.773924	0.766145	0.442016	0.672431	0.424819
Q9NVP1	DDX18	2.17143	2.32885	0.00468977	0.0254524	+	C33A_C93	1.11865	5.69731	+	cPERP-D	ATP-dependent RNA helicase DDX18 OS=Homo sapiens OX=9606 GN=DDX18 PE=1 SV=2	0	42.975	25	12	127	12	670	75.4	9.5	43.34	12	0	1.49114	1.24687	1.47693	0.26392	-0.0130654	0.608154	1.07808	0.912838	0.908514
Q8ND56	LSM14A	0.921734	0.140899	0.722937	0.833662			-0.117577	-0.380471		C19orf13 FAM61A RAP55 RAP55A	Protein LSM14 homolog A OS=Homo sapiens OX=9606 GN=LSM14A PE=1 SV=3	0	42.924	21	10	92	10	463	50.5	9.52	34.67	10	0	-0.173307	-0.77468	0.0801746	-0.458636	0.150573	-0.207018	0.458594	1.34776	0.761068
Q9H2G2	SLK	0.706227	0.454386	0.351248	0.441588			-0.501797	-1.05422		KIAA0204 STK2	STE20-like serine/threonine-protein kinase OS=Homo sapiens OX=9606 GN=SLK PE=1 SV=1	0	42.805	13	12	84	11	1235	142.6	5.15	23.82	12	0	-2.3375	-0.858515	-1.36861	-0.703614	-0.976931	-1.37868	-2.30355	-1.76841	-4.67387
P04406	GAPDH	1.08885	0.176152	0.666573	0.788246			0.122804	0.464306		GAPD	Glyceraldehyde-3-phosphate dehydrogenase OS=Homo sapiens OX=9606 GN=GAPDH PE=1 SV=3	0	42.793	26	7	207	7	335	36	8.46	84.57	7	0	3.01171	3.83305	3.07268	3.16333	3.18012	3.20557	2.82406	2.72242	2.77123
P01024	C3	0.802289	1.17528	0.0667915	0.104966			-0.317807	-2.49965		CPAMD1	Complement C3 OS=Homo sapiens OX=9606 GN=C3 PE=1 SV=2	0	42.719	8	12	113	12	1663	187	6.4	46.54	12	0	2.03608	1.71724	2.08421	2.20415	2.37129	2.21552	1.42257	1.49268	1.44209
Q16658	FSCN1	0.790898	1.12436	0.0751	0.113947			-0.338436	-2.39083		FAN1 HSN SNL	Fascin OS=Homo sapiens OX=9606 GN=FSCN1 PE=1 SV=3	0	42.625	31	11	78	11	493	54.5	7.24	23.42	11	0	-1.63966	-1.66055	-1.72932	-1.59297	-1.30646	-1.11479	-4.20904	-4.0581	-4.9644
Q8WV44	TRIM41	3.68404	1.14261	0.0720094	0.10987			1.88129	2.42963	+	RINCK	E3 ubiquitin-protein ligase TRIM41 OS=Homo sapiens OX=9606 GN=TRIM41 PE=1 SV=3	0	42.601	21	11	84	11	630	71.6	5.06	26.51	11	0	1.10648	0.774102	0.015099	-1.34267	-2.41898	0.013463	0.437457	0.735957	-0.149673
Q9H6S1	AZI2	1.14416	0.821391	0.150872	0.194013			0.194291	1.77322		NAP1 TBKBP2	5-azacytidine-induced protein 2 OS=Homo sapiens OX=9606 GN=AZI2 PE=1 SV=1	0	42.559	26	10	138	10	392	44.9	6.6	74.71	10	0	0.766437	0.654385	0.846557	0.37525	0.628525	0.680733	1.59803	1.63932	1.26785
Q96PK6	RBM14	1.03772	0.179562	0.66136	0.783284			0.0534128	0.47225		SIP	RNA-binding protein 14 OS=Homo sapiens OX=9606 GN=RBM14 PE=1 SV=2	0	42.485	15	9	225	9	669	69.4	9.67	103.37	9	0	2.53933	2.41904	2.35204	2.57174	2.23664	2.3418	2.35003	2.60403	2.3703
Q13573	SNW1	1.17975	1.92807	0.0118014	0.0368425	+	C33A_C93	0.238482	4.38795		SKIIP SKIP	SNW domain-containing protein 1 OS=Homo sapiens OX=9606 GN=SNW1 PE=1 SV=1	0	42.463	19	10	211	10	536	61.5	9.52	83.7	10	0	1.86102	1.94089	2.00691	1.65078	1.67809	1.7645	2.84711	2.75276	2.62527
Q9H4L5	OSBPL3	0.774558	1.3923	0.0405226	0.07336			-0.368555	-2.98538		KIAA0704 ORP3 OSBP3	Oxysterol-binding protein-related protein 3 OS=Homo sapiens OX=9606 GN=OSBPL3 PE=1 SV=1	0	42.441	15	12	120	11	887	101.2	6.87	32.53	12	1	-0.608739	-0.860452	-0.51595	-0.325152	-0.162361	-0.391964	-0.459823	-0.205767	-0.0286732
Q8NHW5	RPLP0P6	1.24453	1.34426	0.0452622	0.0800967			0.315599	2.87452			Putative ribosomal protein uL10-like OS=Homo sapiens OX=9606 GN=RPLP0P6 PE=5 SV=1	0	42.384	27	7	537	7	317	34.3	5.55	225.94	7	0	5.77214	5.63939	5.60141	5.39962	5.16999	5.49654	5.84368	5.17558	5.57084
P36507	MAP2K2	0.862044	0.884051	0.130602	0.172378			-0.214167	-1.89759		MEK2 MKK2 PRKMK2	Dual specificity mitogen-activated protein kinase kinase 2 OS=Homo sapiens OX=9606 GN=MAP2K2 PE=1 SV=1	0	42.332	26	10	138	5	400	44.4	6.55	58.4	10	0	0.0324574	0.261046	0.063604	0.304336	0.198568	0.496704	0.326345	0.312075	0.250882
Q9Y2W2	WBP11	4.12769	3.4105	0.000388594	0.0147586	+	C33A_C93	2.04534	10.9969	+	NPWBP SIPP1 SNP70	WW domain-binding protein 11 OS=Homo sapiens OX=9606 GN=WBP11 PE=1 SV=1	0	42.319	15	11	143	11	641	70	8.38	51.72	11	0	0.538956	0.405862	0.586726	-1.82241	-1.20947	-1.57259	0.765113	0.67674	0.78041
Q92973	TNPO1	0.896664	0.580262	0.262868	0.328304			-0.157361	-1.30188		KPNB2 MIP1 TRN	Transportin-1 OS=Homo sapiens OX=9606 GN=TNPO1 PE=1 SV=2	0	42.269	13	11	172	11	898	102.3	4.98	86.8	11	0	1.83053	1.91752	1.60284	1.91295	1.82526	2.08476	1.65835	1.44901	1.69121
P78344	EIF4G2	2.23448	2.04477	0.00902044	0.0315477	+	C33A_C93	1.15994	4.74252	+	DAP5	Eukaryotic translation initiation factor 4 gamma 2 OS=Homo sapiens OX=9606 GN=EIF4G2 PE=1 SV=1	0	42.253	14	12	109	12	907	102.3	7.14	45.37	12	0	1.46495	1.60561	1.86137	0.180872	0.370789	0.900459	1.6572	1.88568	1.81156
P26641	EEF1G	1.09144	0.768405	0.170449	0.218399			0.126237	1.66896		EF1G	Elongation factor 1-gamma OS=Homo sapiens OX=9606 GN=EEF1G PE=1 SV=3	0	42.23	21	9	242	9	437	50.1	6.67	122.98	9	0	3.34973	3.5676	3.5743	3.37971	3.39457	3.33864	3.76685	3.68024	3.63292
A0A8I5KQE6	RPSA2	1.31555	1.29133	0.0511293	0.0842767			0.395664	2.75466		RPSA RPSAP58	Small ribosomal subunit protein uS2B OS=Homo sapiens OX=9606 GN=RPSA2 PE=3 SV=1	0	42.217	29	7	268	7	295	32.9	4.87	140.12	7	0	4.1939	4.55979	4.49864	4.10437	3.84497	4.11599	4.41838	4.21709	4.24918
O00429	DNM1L	0.839621	0.729855	0.186271	0.235711			-0.25219	-1.5935		DLP1 DRP1	Dynamin-1-like protein OS=Homo sapiens OX=9606 GN=DNM1L PE=1 SV=2	0	42.176	16	10	149	10	736	81.8	6.81	68.3	10	0	1.21411	1.51482	1.17451	1.36545	1.52884	1.76572	1.13334	0.745984	1.28178
Q9H8H2	DDX31	1.07791	0.7052	0.197151	0.248016			0.108237	1.54536			Probable ATP-dependent RNA helicase DDX31 OS=Homo sapiens OX=9606 GN=DDX31 PE=1 SV=2	0	42.128	16	11	135	11	851	94	9.99	41.89	11	0	0.74621	0.617192	0.789335	0.594753	0.697471	0.535801	0.538391	0.204954	0.265648
Q99459	CDC5L	1.14792	0.326284	0.471755	0.588911			0.199016	0.79378		KIAA0432 PCDC5RP	Cell division cycle 5-like protein OS=Homo sapiens OX=9606 GN=CDC5L PE=1 SV=2	0	42.112	22	12	87	12	802	92.2	8.18	37.72	12	0	0.453583	0.393018	0.318205	0.303541	0.549465	-0.285247	0.452686	0.217212	0.390157
O60488	ACSL4	0.653007	1.05138	0.0888431	0.129698			-0.614829	-2.23775		ACS4 FACL4 LACS4	Long-chain-fatty-acid--CoA ligase 4 OS=Homo sapiens OX=9606 GN=ACSL4 PE=1 SV=2	0	42.029	15	9	175	8	711	79.1	8.38	73.29	9	0	-0.221029	0.622458	0.563738	0.909387	0.885965	1.0143	-0.388962	-0.490149	0.587013
O15042	U2SURP	1.07603	0.196911	0.635462	0.764989			0.105721	0.512252		KIAA0332 SR140	U2 snRNP-associated SURP motif-containing protein OS=Homo sapiens OX=9606 GN=U2SURP PE=1 SV=2	0	42.01	11	9	154	9	1029	118.2	8.47	66.02	9	0	0.942223	0.869498	0.619576	0.513143	1.06811	0.532882	-0.139915	0.302048	0.0896764
Q92538	GBF1	1.01586	0.0490746	0.893152	0.951933			0.0227079	0.143071		KIAA0248	Golgi-specific brefeldin A-resistance guanine nucleotide exchange factor 1 OS=Homo sapiens OX=9606 GN=GBF1 PE=1 SV=3	0	41.938	9	13	92	13	1860	206.4	5.73	25.11	13	0	0.509768	0.358858	0.429021	0.610197	0.110252	0.509074	0.594129	0.366712	0.406081
Q9H4H8	FAM83D	1.4337	1.25365	0.0557634	0.0919347			0.519739	2.67073		C20orf129	Protein FAM83D OS=Homo sapiens OX=9606 GN=FAM83D PE=1 SV=3	0	41.909	29	11	141	11	585	64.4	6.54	53.97	11	0	0.599365	0.686844	0.886867	-0.140477	0.326417	0.427918	1.09114	1.4083	1.24384
Q9H9C1	VIPAS39	1.33302	0.905999	0.124165	0.163644			0.414699	1.94148		C14orf133 SPE39 VIPAR	Spermatogenesis-defective protein 39 homolog OS=Homo sapiens OX=9606 GN=VIPAS39 PE=1 SV=1	0	41.906	34	12	97	12	493	57	7.4	27.92	12	0	-0.956193	-0.932987	-1.18005	-1.66069	-1.04173	-1.6109	-1.09984	-0.686402	-0.935818
O00622	CCN1	1.21143	1.11664	0.0764473	0.115362			0.276709	2.37448		CYR61 GIG1 IGFBP10	CCN family member 1 OS=Homo sapiens OX=9606 GN=CCN1 PE=1 SV=1	0	41.796	31	10	238	10	381	42	8.21	125.88	10	0	2.84852	2.65687	3.0068	2.54539	2.46904	2.66764	3.39363	3.3521	3.05432
P23528	CFL1	0.680095	0.876367	0.132933	0.175721			-0.556192	-1.88226		CFL	Cofilin-1 OS=Homo sapiens OX=9606 GN=CFL1 PE=1 SV=3	0	41.795	54	7	99	5	166	18.5	8.09	39.27	7	2	2.43477	3.32782	3.05381	3.35617	3.369	3.75981	2.90382	2.98624	2.79035
Q9Y4W2	LAS1L	0.74995	1.327	0.047098	0.0817172			-0.415134	-2.83516			Ribosomal biogenesis protein LAS1L OS=Homo sapiens OX=9606 GN=LAS1L PE=1 SV=2	0	41.763	21	11	138	11	734	83	4.73	60.31	11	0	0.477547	0.815831	0.696374	0.902075	1.05896	1.27412	0.880665	0.401682	0.543883
Q6NZI2	CAVIN1	0.92257	0.568478	0.270098	0.336866			-0.11627	-1.27887		PTRF	Caveolae-associated protein 1 OS=Homo sapiens OX=9606 GN=CAVIN1 PE=1 SV=1	0	41.724	26	10	172	10	390	43.5	5.6	72.16	10	0	3.11159	2.89124	3.1389	3.25417	3.13212	3.10424	3.29594	2.95644	2.96161
P53985	SLC16A1	0.979035	0.12212	0.754884	0.857274			-0.030568	-0.334388		MCT1	Monocarboxylate transporter 1 OS=Homo sapiens OX=9606 GN=SLC16A1 PE=1 SV=3	0	41.647	16	6	87	6	500	53.9	8.66	38.38	6	0	2.5914	2.43971	2.44787	2.5968	2.60428	2.3696	2.36995	2.31779	2.46867
Q92621	NUP205	0.942429	0.139005	0.726097	0.836013			-0.0855436	-0.375872		C7orf14 KIAA0225	Nuclear pore complex protein Nup205 OS=Homo sapiens OX=9606 GN=NUP205 PE=1 SV=3	0	41.645	7	11	56	11	2012	227.8	6.19	17.13	11	0	-0.916982	-1.3251	-0.988683	-1.29442	-0.64229	-1.03742	-1.01073	-1.04459	-0.60067
P30876	POLR2B	1.12941	0.839438	0.144731	0.186037			0.175564	1.80891			DNA-directed RNA polymerase II subunit RPB2 OS=Homo sapiens OX=9606 GN=POLR2B PE=1 SV=1	0	41.598	10	9	110	9	1174	133.8	6.87	33.31	9	0	1.28445	1.36291	1.33532	1.31301	1.15652	0.986456	1.28105	1.1552	1.31637
Q5VYS8	TUT7	1.81325	0.557804	0.276819	0.343542			0.858582	1.258		HS2 KIAA1711 ZCCHC6	Terminal uridylyltransferase 7 OS=Homo sapiens OX=9606 GN=TUT7 PE=1 SV=1	0	41.506	10	12	92	12	1495	171.1	6.83	25.87	12	0	-3.30376	-1.45331	-1.48196	-2.37425	-3.40689	-3.03363	-2.643	-2.75057	-2.83597
Q99569	PKP4	1.94997	0.674225	0.211727	0.266303			0.96345	1.48497			Plakophilin-4 OS=Homo sapiens OX=9606 GN=PKP4 PE=1 SV=2	0	41.367	11	11	140	11	1192	131.8	8.94	43.6	11	0	-1.02646	-0.97974	-0.0979989	-0.914149	-2.79289	-1.28751	-0.359631	-0.466395	-0.934645
Q9NR31	SAR1A	1.0111	0.047231	0.896952	0.952487			0.015926	0.137942		SAR1 SARA SARA1	GTP-binding protein SAR1a OS=Homo sapiens OX=9606 GN=SAR1A PE=1 SV=1	0	41.359	32	10	364	8	198	22.4	6.68	130.48	10	2	3.58839	3.69552	3.46839	3.38603	3.6124	3.7061	3.57374	3.21534	3.43039
P50281	MMP14	0.468446	2.8764	0.00132923	0.0154318	+	C33A_C93	-1.09405	-7.99155	+		Matrix metalloproteinase-14 OS=Homo sapiens OX=9606 GN=MMP14 PE=1 SV=3	0	41.353	16	11	270	11	582	65.9	7.77	137.41	11	0	2.98737	2.69963	2.58466	3.80701	3.76512	3.98168	2.88424	2.36466	2.74128
Q9C0D5	TANC1	5.26317	1.44601	0.0358092	0.0691334			2.39593	3.11181	+	KIAA1728	Protein TANC1 OS=Homo sapiens OX=9606 GN=TANC1 PE=1 SV=3	0	41.269	9	12	73	12	1861	202.1	8.32	15.95	12	0	-1.69709	-2.11969	-1.36661	-3.56935	-3.21539	-5.58644	-1.13983	-1.09874	-0.705238
Q9BZE4	GTPBP4	1.66023	1.02093	0.0952942	0.136406			0.731387	2.17483		CRFG NOG1	GTP-binding protein 4 OS=Homo sapiens OX=9606 GN=GTPBP4 PE=1 SV=3	0	41.241	17	10	206	10	634	73.9	9.5	93.84	10	0	1.73281	1.58102	1.14634	1.23256	0.792096	0.241362	1.49499	1.21617	1.13013
P78347	GTF2I	0.879555	0.623668	0.237866	0.294359			-0.185154	-1.3865		BAP135 WBSCR6	General transcription factor II-I OS=Homo sapiens OX=9606 GN=GTF2I PE=1 SV=2	0	41.211	12	11	107	11	998	112.3	6.39	31.74	11	0	0.251623	0.253198	0.34999	0.694998	0.468936	0.24634	0.604726	0.827739	0.56147
Q9UKD2	MRTO4	1.20791	1.70205	0.0198586	0.0492117	+	C33A_C93	0.272511	3.75513		C1orf33 MRT4	mRNA turnover protein 4 homolog OS=Homo sapiens OX=9606 GN=MRTO4 PE=1 SV=2	0	41.186	36	9	208	9	239	27.5	8.29	117.25	9	0	3.39633	3.24771	3.22109	3.03292	2.92571	3.08897	3.38865	2.87047	3.31819
Q9H361	PABPC3	2.10801	4.21585	6.08343e-05	0.01	+	C33A_C93	1.07588	17.6273	+	PABP3 PABPL3	Polyadenylate-binding protein 3 OS=Homo sapiens OX=9606 GN=PABPC3 PE=1 SV=2	0	41.172	12	8	296	6	631	70	9.67	120.87	8	0	4.66914	4.73691	4.84145	3.70491	3.6037	3.71123	4.62306	4.38338	4.46959
Q5JWF2	GNAS	0.995194	0.0121688	0.972369	0.987851			-0.00694982	-0.0368515		GNAS1	Guanine nucleotide-binding protein G(s) subunit alpha isoforms XLas OS=Homo sapiens OX=9606 GN=GNAS PE=1 SV=2	0	41.15	11	10	289	10	1037	111	5.03	151.93	10	0	3.30688	3.29562	2.90849	3.2459	3.37038	2.91555	2.67714	1.40468	2.69985
P63092	GNAS	0.995194	0.0121688	0.972369	0.987527			-0.00694982	-0.0368515		GNAS1 GSP	Guanine nucleotide-binding protein G(s) subunit alpha isoforms short OS=Homo sapiens OX=9606 GN=GNAS PE=1 SV=1	0	41.15	29	10	289	10	394	45.6	5.82	151.93	10	0	3.30688	3.29562	2.90849	3.2459	3.37038	2.91555	2.67714	1.40468	2.69985
Q9NSI2	SLX9	1.41114	2.71573	0.00192431	0.0191388	+	C33A_C93	0.496856	7.24714	+	C21orf70 FAM207A	Ribosome biogenesis protein SLX9 homolog OS=Homo sapiens OX=9606 GN=SLX9 PE=1 SV=2	0	41.068	43	10	179	10	230	25.4	11.08	76.55	10	0	0.803038	0.950683	0.809941	0.395058	0.260841	0.417194	1.12391	0.538997	0.75243
Q92552	MRPS27	1.59356	1.90636	0.0124062	0.0364259	+	C33A_C93	0.672251	4.3242	+	KIAA0264	Small ribosomal subunit protein mS27 OS=Homo sapiens OX=9606 GN=MRPS27 PE=1 SV=3	0	40.99	33	11	151	11	414	47.6	6.18	70.94	11	0	1.92169	1.56961	1.84812	1.00383	1.33247	0.986368	1.70338	1.23549	1.74267
Q15717	ELAVL1	1.54253	2.27623	0.00529382	0.0259478	+	C33A_C93	0.625296	5.50985	+	HUR	ELAV-like protein 1 OS=Homo sapiens OX=9606 GN=ELAVL1 PE=1 SV=2	0	40.978	33	8	258	8	326	36.1	9.17	111.28	8	0	2.09642	2.11365	2.40717	1.49036	1.58023	1.67075	2.34129	2.54724	2.13993
Q8N9T8	KRI1	1.25449	0.612102	0.244286	0.302116			0.327097	1.36397			Protein KRI1 homolog OS=Homo sapiens OX=9606 GN=KRI1 PE=1 SV=3	0	40.974	16	9	108	9	703	82.5	5.14	55.58	9	0	0.964195	0.929565	1.47323	0.878281	0.480375	1.02704	1.49083	1.96246	1.49472
P61158	ACTR3	0.793061	0.933269	0.116609	0.15655			-0.334496	-1.9963		ARP3	Actin-related protein 3 OS=Homo sapiens OX=9606 GN=ACTR3 PE=1 SV=3	0	40.968	28	10	133	10	418	47.3	5.88	48.61	10	0	0.809153	1.37548	1.18281	1.45188	1.42352	1.49553	-0.0644071	-0.317311	0.49308
Q00688	FKBP3	2.55565	0.786682	0.163425	0.208512			1.35369	1.70484		FKBP25	Peptidyl-prolyl cis-trans isomerase FKBP3 OS=Homo sapiens OX=9606 GN=FKBP3 PE=1 SV=1	0	40.955	47	9	75	9	224	25.2	9.28	33.03	9	0	0.0507889	2.06351	0.305509	-1.36279	-0.576632	0.298162	-0.318793	-1.68032	-0.1038
O94905	ERLIN2	0.397222	4.70905	1.95413e-05	0.0148571	+	C33A_C93	-1.33198	-23.4687	+	C8orf2 SPFH2	Erlin-2 OS=Homo sapiens OX=9606 GN=ERLIN2 PE=1 SV=1	0	40.949	33	11	116	8	339	37.8	5.62	48.83	11	3	1.20187	1.23744	1.1562	2.52169	2.44574	2.62403	1.398	1.1332	1.13232
Q05639	EEF1A2	3.04295	0.643835	0.227073	0.283339			1.60547	1.42578		EEF1AL STN	Elongation factor 1-alpha 2 OS=Homo sapiens OX=9606 GN=EEF1A2 PE=1 SV=1	0	40.862	25	8	428	2	463	50.4	9.03	203.4	8	0	-1.89774	-2.23972	-1.75349	-2.59642	-2.31425	-5.79669	-2.25363	-2.02116	-2.07468
Q9UN86	G3BP2	3.83634	2.26725	0.00540443	0.0257841	+	C33A_C93	1.93973	5.47836	+	KIAA0660	Ras GTPase-activating protein-binding protein 2 OS=Homo sapiens OX=9606 GN=G3BP2 PE=1 SV=2	0	40.813	21	8	145	7	482	54.1	5.55	58.01	8	0	2.36549	2.39425	2.64367	1.20153	0.0793727	0.303321	2.56919	2.3022	2.36933
Q86X29	LSR	0.986848	0.0550607	0.880926	0.943643			-0.0190995	-0.159607		ILDR3 LISCH	Lipolysis-stimulated lipoprotein receptor OS=Homo sapiens OX=9606 GN=LSR PE=1 SV=4	0	40.792	18	9	101	9	649	71.4	7.97	40.89	9	0	1.36322	0.979332	1.12786	1.23358	1.20179	1.09234	1.40998	1.04573	1.43111
Q6P2H3	CEP85	2.01433	1.7825	0.0165005	0.043592	+	C33A_C93	1.0103	3.97277	+	CCDC21	Centrosomal protein of 85 kDa OS=Homo sapiens OX=9606 GN=CEP85 PE=1 SV=1	0	40.755	14	11	145	11	762	85.6	6	55.6	11	0	0.639345	0.398612	0.886015	-0.79218	-0.174634	-0.140119	1.30524	1.48974	1.01391
Q14134	TRIM29	2.73996	1.77301	0.0168652	0.0445091	+	C33A_C93	1.45416	3.94666	+	ATDC	Tripartite motif-containing protein 29 OS=Homo sapiens OX=9606 GN=TRIM29 PE=1 SV=2	0	40.755	24	12	155	12	588	65.8	7.15	50.7	12	0	0.358097	1.06675	0.439454	-0.256322	-1.20873	-1.03313	1.30651	0.998064	1.26744
P83111	LACTB	0.585604	1.47393	0.0335789	0.0682365			-0.772003	-3.17864	+	MRPL56	Serine beta-lactamase-like protein LACTB, mitochondrial OS=Homo sapiens OX=9606 GN=LACTB PE=1 SV=2	0	40.743	22	10	98	10	547	60.7	8.53	26.4	10	0	-0.94214	-0.811767	-1.04202	0.0365536	-0.6252	0.108725	-0.66843	-1.31549	-1.84957
P23921	RRM1	0.830203	0.975405	0.105827	0.147487			-0.268464	-2.08164		RR1	Ribonucleoside-diphosphate reductase large subunit OS=Homo sapiens OX=9606 GN=RRM1 PE=1 SV=1	0	40.72	15	9	113	9	792	90	7.15	48.7	9	0	0.69273	0.855355	0.75605	0.798133	1.17938	1.13201	0.845762	0.802124	0.750601
Q9Y2A7	NCKAP1	0.918136	0.148442	0.71049	0.820572			-0.123221	-0.398687		HEM2 KIAA0587 NAP1	Nck-associated protein 1 OS=Homo sapiens OX=9606 GN=NCKAP1 PE=1 SV=1	0	40.713	10	10	167	10	1128	128.7	6.62	58.79	10	0	0.449101	0.313422	0.4918	0.396636	1.12572	0.10163	-0.120244	-0.113611	0.171574
P49756	RBM25	0.77985	1.37569	0.0421028	0.0747896			-0.358731	-2.94681		RNPC7	RNA-binding protein 25 OS=Homo sapiens OX=9606 GN=RBM25 PE=1 SV=3	0	40.68	16	10	94	10	843	100.1	6.32	37.82	10	0	0.870878	0.627267	1.01639	1.19039	1.12421	1.27613	0.441061	1.00486	0.843267
Q641Q2	WASHC2A	0.783579	0.5663	0.271456	0.338192			-0.351849	-1.27461		FAM21A FAM21B	WASH complex subunit 2A OS=Homo sapiens OX=9606 GN=WASHC2A PE=1 SV=3	0	40.672	13	11	58	11	1341	147.1	4.81	10.12	11	0	0.13772	-0.0876595	-0.268027	0.773601	-0.030816	0.0947945	1.01845	0.187343	-0.0562019
Q9UL03	INTS6	0.752785	1.85153	0.0140756	0.0390446	+	C33A_C93	-0.409691	-4.16609	+	DBI1 DDX26 DDX26A	Integrator complex subunit 6 OS=Homo sapiens OX=9606 GN=INTS6 PE=1 SV=1	0	40.61	21	12	83	12	887	100.3	8.62	24.45	12	0	-0.6425	-0.418428	-0.679853	-0.0707557	-0.259831	-0.181122	-0.830566	-0.529824	-0.445444
Q92896	GLG1	0.467913	1.42957	0.0371899	0.069547			-1.09569	-3.07284	+	CFR1 ESL1 MG160	Golgi apparatus protein 1 OS=Homo sapiens OX=9606 GN=GLG1 PE=1 SV=2	0	40.559	10	10	178	10	1179	134.5	6.9	85.54	10	0	0.0901108	1.22864	0.289937	1.54995	1.75559	1.59021	1.16478	-0.356592	0.873575
Q5H9R7	PPP6R3	0.696285	0.297554	0.504018	0.627626			-0.522249	-0.733331		C11orf23 KIAA1558 PP6R3 SAPL SAPS3	Serine/threonine-protein phosphatase 6 regulatory subunit 3 OS=Homo sapiens OX=9606 GN=PPP6R3 PE=1 SV=2	0	40.476	15	9	89	9	873	97.6	4.6	31.25	9	0	-1.55624	-2.58149	-0.738938	-1.1692	-0.254336	-1.88639	-2.53285	-0.608123	-0.861815
Q9H8Y5	ANKZF1	0.767083	2.31476	0.00484437	0.025345	+	C33A_C93	-0.382545	-5.64663	+	ZNF744	tRNA endonuclease ANKZF1 OS=Homo sapiens OX=9606 GN=ANKZF1 PE=1 SV=1	0	40.459	18	10	116	10	726	80.9	8.41	46.71	10	0	0.357471	0.209647	0.201689	0.691005	0.676193	0.549244	0.148085	-0.246463	0.193877
Q8IX01	SUGP2	0.625351	1.78216	0.0165133	0.0435192	+	C33A_C93	-0.677261	-3.97183	+	KIAA0365 SFRS14	SURP and G-patch domain-containing protein 2 OS=Homo sapiens OX=9606 GN=SUGP2 PE=1 SV=2	0	40.424	13	10	70	10	1082	120.1	7.28	19.03	10	0	0.130571	0.180231	0.644294	0.947003	1.09181	0.94807	0.0487324	0.823819	-0.149906
P40763	STAT3	0.699158	1.60189	0.0250096	0.0555916			-0.516309	-3.49498	+	APRF	Signal transducer and activator of transcription 3 OS=Homo sapiens OX=9606 GN=STAT3 PE=1 SV=2	0	40.23	18	10	89	10	770	88	6.3	28.35	10	0	-0.170131	-0.0579283	-0.167331	0.193008	0.664307	0.296222	0.0322077	-0.154192	0.00272998
Q16630	CPSF6	1.17972	2.51408	0.00306138	0.0227463	+	C33A_C93	0.238442	6.39975		CFIM68	Cleavage and polyadenylation specificity factor subunit 6 OS=Homo sapiens OX=9606 GN=CPSF6 PE=1 SV=2	0	40.176	20	9	149	9	551	59.2	7.15	61.2	9	0	2.13855	2.10246	2.02779	1.84039	1.88631	1.82677	1.69931	1.98522	1.8886
Q96PY5	FMNL2	2.26187	0.682924	0.207528	0.261289			1.17752	1.50192		FHOD2 KIAA1902	Formin-like protein 2 OS=Homo sapiens OX=9606 GN=FMNL2 PE=1 SV=3	0	40.157	12	12	56	9	1086	123.2	7.4	14.71	12	0	-1.88983	-1.7918	-2.28864	-4.67383	-2.14393	-2.68506	-1.25533	-2.46204	-1.96744
P62195	PSMC5	1.3765	0.350116	0.446564	0.564222			0.461001	0.843247		SUG1	26S proteasome regulatory subunit 8 OS=Homo sapiens OX=9606 GN=PSMC5 PE=1 SV=1	0	40.017	28	9	155	9	406	45.6	7.55	49.25	9	0	0.763418	0.821924	-0.395924	-0.462493	-0.418789	0.687697	0.39222	0.65191	0.164806
P13674	P4HA1	0.589104	2.19725	0.00634971	0.0280107	+	C33A_C93	-0.763405	-5.23782	+	P4HA	Prolyl 4-hydroxylase subunit alpha-1 OS=Homo sapiens OX=9606 GN=P4HA1 PE=1 SV=2	0	39.997	21	8	125	8	534	61	6.01	45.76	8	0	0.0864372	0.4295	0.17886	0.994718	1.17464	0.815651	-0.480916	-0.580582	-0.69838
Q9BXS4	TMEM59	0.803428	1.31914	0.0479581	0.0820102			-0.315759	-2.81733		C1orf8	Transmembrane protein 59 OS=Homo sapiens OX=9606 GN=TMEM59 PE=1 SV=1	0	39.971	28	7	232	7	323	36.2	5.1	112.5	7	0	3.52015	3.16627	3.20811	3.59423	3.62331	3.62427	3.34136	2.5374	3.14702
Q9Y4F5	CEP170B	2.87497	1.46618	0.0341838	0.0689598			1.52355	3.16001	+	FAM68C KIAA0284	Centrosomal protein of 170 kDa protein B OS=Homo sapiens OX=9606 GN=CEP170B PE=1 SV=4	0	39.915	10	13	71	13	1589	171.6	6.84	15.08	13	0	-1.65118	-1.39308	-1.6103	-3.07457	-3.89879	-2.25183	-1.18783	-2.05274	-1.84601
P18085	ARF4	0.827153	1.00957	0.0978195	0.139756			-0.273774	-2.15148		ARF2	ADP-ribosylation factor 4 OS=Homo sapiens OX=9606 GN=ARF4 PE=1 SV=3	0	39.913	44	8	333	3	180	20.5	7.14	145.38	8	0	3.13895	3.20954	3.44316	3.36225	3.61307	3.63764	3.68616	3.56041	3.71365
Q14166	TTLL12	1.27506	1.19277	0.0641544	0.101415			0.350567	2.53745		KIAA0153	Tubulin--tyrosine ligase-like protein 12 OS=Homo sapiens OX=9606 GN=TTLL12 PE=1 SV=2	0	39.85	22	9	123	9	644	74.4	5.53	36.76	9	0	0.812481	0.854832	0.863457	0.472641	0.740292	0.266136	0.481234	0.304137	0.678619
Q9NUQ6	SPATS2L	1.30809	3.70506	0.000197213	0.00984127	+	C33A_C93	0.387466	13.0804	+	DNAPTP6	SPATS2-like protein OS=Homo sapiens OX=9606 GN=SPATS2L PE=1 SV=2	0	39.696	21	10	202	10	558	61.7	9.64	65.43	10	0	1.33137	1.38278	1.3712	0.934495	0.967483	1.02098	1.11578	0.588855	0.98171
Q9H0H5	RACGAP1	2.53948	4.13285	7.36467e-05	0.00814815	+	C33A_C93	1.34453	16.7958	+	KIAA1478 MGCRACGAP	Rac GTPase-activating protein 1 OS=Homo sapiens OX=9606 GN=RACGAP1 PE=1 SV=1	0	39.676	23	11	128	11	632	71	8.88	61.93	11	0	2.23263	2.12262	2.2327	0.755872	0.990548	0.807938	2.18604	1.89593	2.11367
Q14155	ARHGEF7	0.978705	0.0441396	0.903359	0.956234			-0.0310537	-0.129303		COOL1 KIAA0142 P85SPR PAK3BP PIXB	Rho guanine nucleotide exchange factor 7 OS=Homo sapiens OX=9606 GN=ARHGEF7 PE=1 SV=2	0	39.571	13	10	149	10	803	90	7.09	62.43	10	0	0.737742	0.918239	1.48665	1.20651	0.925145	1.10414	1.9682	2.29602	1.81046
Q9H553	ALG2	0.733478	1.34464	0.0452234	0.0801811			-0.447175	-2.87537			Alpha-1,3/1,6-mannosyltransferase ALG2 OS=Homo sapiens OX=9606 GN=ALG2 PE=1 SV=1	0	39.543	28	9	157	9	416	47.1	7.05	65.04	9	0	1.4644	1.5521	1.13758	1.68622	1.99918	1.81019	1.38159	0.940208	1.07398
Q15262	PTPRK	0.363058	1.76344	0.0172408	0.0447921	+	C33A_C93	-1.46173	-3.92047	+	PTPK	Receptor-type tyrosine-protein phosphatase kappa OS=Homo sapiens OX=9606 GN=PTPRK PE=1 SV=2	0	39.456	11	10	93	10	1439	162	5.9	25.58	10	0	-3.22384	-3.88535	-2.63197	-1.80818	-1.92719	-1.6206	-3.63024	-3.91599	-2.47549
Q9NUU7	DDX19A	1.07061	0.29584	0.506011	0.629167			0.0984349	0.729694		DDX19L	ATP-dependent RNA helicase DDX19A OS=Homo sapiens OX=9606 GN=DDX19A PE=1 SV=1	0	39.435	23	9	173	9	478	53.9	6.58	62.41	9	0	1.92455	2.0765	1.9632	1.63676	1.99629	2.0359	2.02465	1.83036	2.13745
Q86VM9	ZC3H18	1.08733	1.15322	0.0702713	0.108945			0.120791	2.4523		NHN1	Zinc finger CCCH domain-containing protein 18 OS=Homo sapiens OX=9606 GN=ZC3H18 PE=1 SV=2	0	39.406	13	9	84	9	953	106.3	8.32	31.86	9	0	0.350422	0.285548	0.213316	0.213649	0.11219	0.161072	-0.0186616	-0.176528	-0.0790634
P00558	PGK1	1.07264	0.0976451	0.798647	0.891964			0.101164	0.27261		PGKA	Phosphoglycerate kinase 1 OS=Homo sapiens OX=9606 GN=PGK1 PE=1 SV=3	0	39.392	29	9	177	9	417	44.6	8.1	71.07	9	0	1.2145	2.36192	1.43074	1.68037	1.69027	1.33303	0.703058	1.2836	1.03352
P98194	ATP2C1	0.723748	1.70378	0.0197796	0.0492795	+	C33A_C93	-0.466441	-3.75972	+	KIAA1347 PMR1L	Calcium-transporting ATPase type 2C member 1 OS=Homo sapiens OX=9606 GN=ATP2C1 PE=1 SV=3	0	39.35	15	9	115	9	919	100.5	6.74	43.05	9	0	0.536177	0.340315	0.265541	0.81636	0.701463	1.02353	-0.126208	-0.772983	-0.154139
Q14568	HSP90AA2P	0.968076	0.115748	0.766041	0.866024			-0.0468084	-0.318502		HSP90AA2 HSPCAL3	Heat shock protein HSP 90-alpha A2 OS=Homo sapiens OX=9606 GN=HSP90AA2P PE=1 SV=2	0	39.343	23	8	567	2	343	39.3	4.65	253.45	8	0	5.36982	5.77215	5.57835	5.64276	5.4543	5.76369	5.81311	5.42944	5.77545
Q8IXT5	RBM12B	1.20043	0.996465	0.100817	0.143166			0.263547	2.12461			RNA-binding protein 12B OS=Homo sapiens OX=9606 GN=RBM12B PE=1 SV=2	0	39.338	13	11	139	11	1001	118	6.81	52.05	11	0	0.0925312	-0.202627	0.196246	-0.273589	-0.262416	-0.168488	-0.198034	0.49599	-0.190613
Q01970	PLCB3	1.74593	0.903075	0.125004	0.164063			0.803996	1.93562			1-phosphatidylinositol 4,5-bisphosphate phosphodiesterase beta-3 OS=Homo sapiens OX=9606 GN=PLCB3 PE=1 SV=2	0	39.314	12	11	66	11	1234	138.7	5.9	18.4	11	0	-1.63127	-0.79285	-1.10708	-2.64926	-1.58938	-1.70455	-1.4342	-2.52255	-2.52407
P62937	PPIA	0.891653	0.653462	0.222095	0.276596			-0.165446	-1.44453		CYPA	Peptidyl-prolyl cis-trans isomerase A OS=Homo sapiens OX=9606 GN=PPIA PE=1 SV=2	0	39.289	62	8	196	8	165	18	7.81	68.54	8	0	2.8692	3.10189	2.79302	2.95377	3.13975	3.16693	2.63042	2.28265	2.77239
P49674	CSNK1E	0.867433	0.617099	0.241491	0.297814			-0.205175	-1.37371			Casein kinase I isoform epsilon OS=Homo sapiens OX=9606 GN=CSNK1E PE=1 SV=1	0	39.271	25	9	207	3	416	47.3	9.66	84.57	9	4	0.347172	0.732186	0.339921	0.573311	0.821862	0.63963	0.780297	-0.25146	0.32734
O15084	ANKRD28	1.0997	0.560623	0.275028	0.341344			0.137105	1.26352		KIAA0379	Serine/threonine-protein phosphatase 6 regulatory ankyrin repeat subunit A OS=Homo sapiens OX=9606 GN=ANKRD28 PE=1 SV=5	0	39.221	12	9	89	8	1053	112.9	6.25	25.39	9	1	1.02123	0.991305	1.23114	0.791462	1.04812	0.992777	0.566913	1.03193	0.842014
O60264	SMARCA5	0.694593	1.35257	0.0444043	0.0788034			-0.525761	-2.89355		SNF2H WCRF135	SWI/SNF-related matrix-associated actin-dependent regulator of chromatin subfamily A member 5 OS=Homo sapiens OX=9606 GN=SMARCA5 PE=1 SV=1	0	39.207	11	11	66	11	1052	121.8	8.09	21.78	11	0	6.95634	6.51469	6.98809	7.21697	7.28076	7.53868	7.21225	5.84106	6.93827
Q8IXB1	DNAJC10	3.1545	0.917184	0.121009	0.160563			1.65741	1.96393		ERDJ5	DnaJ homolog subfamily C member 10 OS=Homo sapiens OX=9606 GN=DNAJC10 PE=1 SV=2	0	39.2	21	11	87	11	793	91	7.18	27.06	11	0	-0.530613	-0.408823	-0.29524	-3.68272	-1.67396	-0.850225	-0.69822	-1.89529	-1.86404
Q15058	KIF14	2.21237	4.53119	2.94317e-05	0.0169231	+	C33A_C93	1.14559	21.1703	+	KIAA0042	Kinesin-like protein KIF14 OS=Homo sapiens OX=9606 GN=KIF14 PE=1 SV=1	0	39.19	8	11	76	11	1648	186.4	7.91	25.3	11	0	1.04473	0.930425	1.02492	-0.195828	-0.176643	-0.0642315	-0.453628	-0.0545829	0.0583344
Q9NX58	LYAR	1.52748	0.275176	0.53067	0.659513			0.611154	0.68554			Cell growth-regulating nucleolar protein OS=Homo sapiens OX=9606 GN=LYAR PE=1 SV=3	0	39.145	28	8	65	8	379	43.6	9.57	21.43	8	0	0.565443	0.519921	-1.89355	-0.300077	-1.56148	-0.780093	-1.30099	-1.38226	-1.53673
P19525	EIF2AK2	2.89987	1.25876	0.0551108	0.0906164			1.53599	2.68206	+	PKR PRKR	Interferon-induced, double-stranded RNA-activated protein kinase OS=Homo sapiens OX=9606 GN=EIF2AK2 PE=1 SV=2	0	39.055	24	10	105	10	551	62.1	8.4	41.58	10	0	0.897354	0.716032	0.867101	-1.4594	-1.07723	0.409159	0.76641	0.82465	0.835509
P35232	PHB1	0.698363	0.813899	0.153497	0.197057			-0.517952	-1.75843		PHB	Prohibitin 1 OS=Homo sapiens OX=9606 GN=PHB1 PE=1 SV=1	0	39.044	45	8	148	8	272	29.8	5.76	52.42	8	0	0.78198	1.79388	1.27017	1.84489	1.82928	1.72572	0.928663	1.09353	1.18217
Q8NHQ9	DDX55	1.54629	0.90094	0.12562	0.165144			0.628807	1.93135		KIAA1595	ATP-dependent RNA helicase DDX55 OS=Homo sapiens OX=9606 GN=DDX55 PE=1 SV=3	0	39.025	19	10	118	10	600	68.5	9.25	41.15	10	0	0.321796	0.197616	-0.231794	-0.277	-0.231367	-1.09043	-0.767651	-0.29614	-0.773949
P22681	CBL	1.11189	0.212953	0.612417	0.739964			0.153018	0.548673		CBL2 RNF55	E3 ubiquitin-protein ligase CBL OS=Homo sapiens OX=9606 GN=CBL PE=1 SV=2	0	38.928	14	10	118	10	906	99.6	6.54	38.95	10	0	-0.776272	-0.519151	0.0505515	-0.829246	-0.492909	-0.381772	0.154858	0.6647	0.358634
O00178	GTPBP1	1.66611	3.45073	0.000354215	0.01605	+	C33A_C93	0.736482	11.2616	+		GTP-binding protein 1 OS=Homo sapiens OX=9606 GN=GTPBP1 PE=1 SV=3	0	38.577	17	8	150	8	669	72.4	8.34	65.28	8	0	2.03109	2.13813	1.92405	1.25404	1.32672	1.30306	2.04091	0.951805	1.58944
Q9BWF3	RBM4	1.11763	0.486425	0.326268	0.407438			0.160439	1.11776		RBM4A	RNA-binding protein 4 OS=Homo sapiens OX=9606 GN=RBM4 PE=1 SV=1	0	38.531	32	9	110	3	364	40.3	7.08	49.73	9	5	1.41747	1.55905	1.70155	1.18341	1.42421	1.58913	2.10924	2.31166	1.97324
P84085	ARF5	1.17993	0.488429	0.324766	0.404923			0.238696	1.12172			ADP-ribosylation factor 5 OS=Homo sapiens OX=9606 GN=ARF5 PE=1 SV=2	0	38.523	45	8	225	2	180	20.5	6.79	77.23	8	0	-0.818132	-0.887319	-0.462383	-1.0576	-0.635845	-1.19048	-0.221611	-0.229801	-0.14138
P61204	ARF3	0.942464	0.311576	0.488004	0.607885			-0.0854913	-0.762954			ADP-ribosylation factor 3 OS=Homo sapiens OX=9606 GN=ARF3 PE=1 SV=2	0	38.466	44	8	233	2	181	20.6	7.43	78.77	8	6	3.04841	3.20336	3.16434	3.03033	3.26649	3.37576	3.29616	2.90143	3.38712
P84077	ARF1	0.942464	0.311576	0.488004	0.607628			-0.0854913	-0.762954			ADP-ribosylation factor 1 OS=Homo sapiens OX=9606 GN=ARF1 PE=1 SV=2	0	38.466	44	8	233	2	181	20.7	6.8	78.77	8	0	3.04841	3.20336	3.16434	3.03033	3.26649	3.37576	3.29616	2.90143	3.38712
P51151	RAB9A	0.823275	1.3391	0.0458032	0.080334			-0.280553	-2.86273		RAB9	Ras-related protein Rab-9A OS=Homo sapiens OX=9606 GN=RAB9A PE=1 SV=1	0	38.407	49	7	253	7	201	22.8	5.47	127.57	7	0	3.3312	3.22773	3.10808	3.42999	3.42817	3.65051	3.34289	2.69333	3.16772
Q7Z4V5	HDGFL2	4.56614	1.0736	0.0844106	0.124994			2.19097	2.28403	+	HDGF2 HDGFRP2 HRP2	Hepatoma-derived growth factor-related protein 2 OS=Homo sapiens OX=9606 GN=HDGFL2 PE=1 SV=1	0	38.386	18	9	122	9	671	74.3	7.49	35.08	9	0	-0.594432	-0.242843	0.240465	-1.42656	-1.49725	-4.24592	0.544527	0.256071	0.521792
P04083	ANXA1	1.0066	0.0112382	0.974455	0.988924			0.00948528	0.0340681		ANX1 LPC1	Annexin A1 OS=Homo sapiens OX=9606 GN=ANXA1 PE=1 SV=2	0	38.37	33	9	141	9	346	38.7	7.02	57.96	9	0	1.92272	2.57364	1.6894	1.87986	2.12393	2.1535	1.39107	1.54194	1.41215
Q66K74	MAP1S	2.0191	1.36212	0.0434392	0.0771654			1.01371	2.91548	+	BPY2IP1 C19orf5 MAP8 VCY2IP1	Microtubule-associated protein 1S OS=Homo sapiens OX=9606 GN=MAP1S PE=1 SV=2	0	38.359	13	9	82	9	1059	112.1	7.3	28.06	9	0	0.948414	1.30258	0.471965	-0.0401423	-0.569947	0.291911	0.563891	0.393264	0.317842
Q9UHD8	SEPTIN9	1.36764	2.40722	0.00391539	0.0226323	+	C33A_C93	0.451688	5.98622	+	KIAA0991 MSF SEPT9	Septin-9 OS=Homo sapiens OX=9606 GN=SEPTIN9 PE=1 SV=2	0	38.294	19	9	148	9	586	65.4	8.97	70.79	9	0	1.69599	1.89447	1.89993	1.31538	1.43438	1.38557	2.00474	1.65631	1.86701
Q7Z2T5	TRMT1L	1.05148	0.233163	0.58457	0.712941			0.0724163	0.593845		C1orf25 TRM1L	TRMT1-like protein OS=Homo sapiens OX=9606 GN=TRMT1L PE=1 SV=2	0	38.261	18	9	121	9	733	81.7	7.88	45.88	9	0	1.4496	1.16325	1.45585	1.26112	1.42278	1.16756	1.31953	1.33638	1.46293
Q5SW79	CEP170	1.43439	1.89858	0.0126306	0.0361509	+	C33A_C93	0.520435	4.3015	+	FAM68A KAB KIAA0470	Centrosomal protein of 170 kDa OS=Homo sapiens OX=9606 GN=CEP170 PE=1 SV=1	0	38.21	8	9	78	9	1584	175.2	7.11	31.35	9	0	0.157595	0.422015	0.509267	-0.250474	-0.0485704	-0.173384	0.455324	0.119448	0.128409
P08621	SNRNP70	1.03452	0.241822	0.573031	0.702279			0.0489558	0.612976		RNPU1Z RPU1 SNRP70 U1AP1	U1 small nuclear ribonucleoprotein 70 kDa OS=Homo sapiens OX=9606 GN=SNRNP70 PE=1 SV=2	0	38.187	20	8	193	8	437	51.5	9.94	87.46	8	0	2.93306	3.0236	3.17915	2.99695	2.93563	3.05636	3.04228	3.01983	2.86919
Q9Y2R4	DDX52	2.49887	1.33744	0.0459788	0.0804407			1.32127	2.85894	+	ROK1	Probable ATP-dependent RNA helicase DDX52 OS=Homo sapiens OX=9606 GN=DDX52 PE=1 SV=4	0	38.183	22	9	82	9	599	67.4	9.67	17.44	9	0	-0.966404	-0.750826	-1.29164	-2.96	-2.51965	-1.49303	-2.02918	-1.68815	-2.43894
Q99570	PIK3R4	0.808883	0.723988	0.188804	0.238344			-0.305997	-1.58203		VPS15	Phosphoinositide 3-kinase regulatory subunit 4 OS=Homo sapiens OX=9606 GN=PIK3R4 PE=1 SV=3	0	38.137	9	10	76	10	1358	153	7.17	24.45	10	0	0.0995026	-0.0556826	-0.402527	0.0247799	0.104259	0.430244	-0.62816	-0.600118	-0.854134
Q9NW82	WDR70	1.4596	1.11499	0.0767382	0.115896			0.545573	2.37099			WD repeat-containing protein 70 OS=Homo sapiens OX=9606 GN=WDR70 PE=1 SV=1	0	38.129	15	10	88	10	654	73.2	6.33	38.03	10	0	0.510792	0.0938743	0.812075	0.0531231	-0.0069993	-0.266103	0.480416	0.880485	0.517611
Q9H223	EHD4	0.77548	0.897573	0.126598	0.16636			-0.366838	-1.92461		HCA10 HCA11 PAST4	EH domain-containing protein 4 OS=Homo sapiens OX=9606 GN=EHD4 PE=1 SV=1	0	38.122	19	10	154	6	541	61.1	6.76	59.94	10	0	1.04445	0.431681	0.877445	1.07796	1.25589	1.12024	0.581527	0.344655	0.570328
Q9NSD9	FARSB	1.58434	1.4141	0.0385393	0.07105			0.663879	3.03636	+	FARSLB FRSB	Phenylalanine--tRNA ligase beta subunit OS=Homo sapiens OX=9606 GN=FARSB PE=1 SV=3	0	38.039	18	9	164	9	589	66.1	6.84	63.8	9	0	1.42836	1.23358	1.07935	0.959381	0.313274	0.477004	1.2507	0.45669	0.627521
A4D1E9	GTPBP10	0.865286	0.566131	0.271562	0.338004			-0.208751	-1.27428		OBGH2	GTP-binding protein 10 OS=Homo sapiens OX=9606 GN=GTPBP10 PE=1 SV=1	0	38.032	35	10	111	10	387	42.9	9.03	39.69	10	0	1.53353	1.53678	1.06425	1.59761	1.66224	1.50096	1.1597	0.141087	1.11969
P23526	AHCY	1.29043	0.733946	0.184524	0.234202			0.367854	1.60149		SAHH	Adenosylhomocysteinase OS=Homo sapiens OX=9606 GN=AHCY PE=1 SV=4	0	37.918	28	10	115	10	432	47.7	6.34	49.68	10	0	0.29376	0.863103	0.139886	-0.0221418	0.194365	0.0209636	0.259908	0.0161671	0.355572
Q14562	DHX8	1.12728	0.315248	0.483895	0.603181			0.172852	0.770674		DDX8	ATP-dependent RNA helicase DHX8 OS=Homo sapiens OX=9606 GN=DHX8 PE=1 SV=1	0	37.873	13	11	58	11	1220	139.2	8.32	20.82	11	0	-1.09599	-0.879451	-0.401024	-0.935437	-0.825523	-1.13406	-1.86358	-1.97492	-1.91599
P61586	RHOA	0.88282	0.345635	0.451196	0.56873			-0.179809	-0.833987		ARH12 ARHA RHO12	Transforming protein RhoA OS=Homo sapiens OX=9606 GN=RHOA PE=1 SV=1	0	37.832	40	7	188	2	193	21.8	6.1	72.04	7	5	3.6178	3.02606	3.19687	3.21469	3.62205	3.54341	2.88201	2.65459	2.96224
Q14181	POLA2	2.74597	1.93494	0.011616	0.0366508	+	C33A_C93	1.45732	4.4083	+		DNA polymerase alpha subunit B OS=Homo sapiens OX=9606 GN=POLA2 PE=1 SV=2	0	37.826	20	8	104	8	598	65.9	5.24	32.64	8	0	0.287023	-0.407221	0.644311	-1.13897	-1.5172	-1.19166	-0.106504	0.49244	0.0458987
Q5T280	SPOUT1	7.57642	2.40338	0.00395023	0.0224153	+	C33A_C93	2.92152	5.97176	+	C9orf114	Putative methyltransferase C9orf114 OS=Homo sapiens OX=9606 GN=SPOUT1 PE=1 SV=3	0	37.823	33	9	121	9	376	42	7.43	47.29	9	0	1.23042	1.20179	1.32016	-0.810881	-2.50027	-1.70102	1.39102	0.400061	1.42902
Q15003	NCAPH	1.45948	0.920711	0.12003	0.159484			0.545458	1.97102		BRRN BRRN1 CAPH KIAA0074	Condensin complex subunit 2 OS=Homo sapiens OX=9606 GN=NCAPH PE=1 SV=3	0	37.798	14	8	108	8	741	82.5	5.06	50.73	8	0	0.284761	0.234934	0.518444	-0.0590951	0.168695	-0.707835	0.87566	0.649603	0.581634
Q9Y2H5	PLEKHA6	2.21631	2.92256	0.00119519	0.0150788	+	C33A_C93	1.14816	8.21776	+	KIAA0969 PEPP3	Pleckstrin homology domain-containing family A member 6 OS=Homo sapiens OX=9606 GN=PLEKHA6 PE=1 SV=4	0	37.779	11	11	112	11	1048	117.1	9.1	35.33	11	0	-0.0650413	0.262296	0.294727	-0.985925	-1.12096	-0.84561	0.849598	1.19068	0.54132
P51812	RPS6KA3	0.957431	0.335492	0.461857	0.577282			-0.062759	-0.812961		ISPK1 MAPKAPK1B RSK2	Ribosomal protein S6 kinase alpha-3 OS=Homo sapiens OX=9606 GN=RPS6KA3 PE=1 SV=1	0	37.779	16	9	101	7	740	83.7	6.89	39.23	9	0	0.828594	0.705395	0.695984	0.692406	0.810853	0.914992	0.420358	0.265374	0.176796
Q9Y4E8	USP15	0.945176	0.0116361	0.973563	0.988356			-0.0813454	-0.0352588		KIAA0529	Ubiquitin carboxyl-terminal hydrolase 15 OS=Homo sapiens OX=9606 GN=USP15 PE=1 SV=3	0	37.741	13	10	106	9	981	112.3	5.22	39.99	10	0	-3.36263	-5.30326	-0.00869613	-5.17379	0.517196	-3.77396	-1.4183	-0.259811	-2.32949
P52294	KPNA1	1.49138	1.17485	0.0668568	0.104871			0.576647	2.49874		RCH2	Importin subunit alpha-5 OS=Homo sapiens OX=9606 GN=KPNA1 PE=1 SV=3	0	37.726	20	9	206	6	538	60.2	5.01	101	9	2	1.68557	1.62958	1.80108	0.932518	1.57794	0.875832	1.95595	2.48353	2.1516
Q13131	PRKAA1	0.901518	0.24112	0.573958	0.702295			-0.149572	-0.611429		AMPK1	5'-AMP-activated protein kinase catalytic subunit alpha-1 OS=Homo sapiens OX=9606 GN=PRKAA1 PE=1 SV=4	0	37.688	14	9	208	9	559	64	8.12	78.67	9	0	1.4013	1.49284	1.16995	1.68155	1.77377	1.05749	1.23782	1.28029	1.13572
Q8TDN6	BRIX1	0.838957	1.50329	0.0313844	0.066109			-0.253331	-3.24971		BRIX BXDC2	Ribosome biogenesis protein BRX1 homolog OS=Homo sapiens OX=9606 GN=BRIX1 PE=1 SV=2	0	37.687	32	9	131	9	353	41.4	9.92	46.02	9	0	1.40824	1.48322	1.29977	1.68988	1.72317	1.53817	1.39926	0.680791	0.698802
Q13443	ADAM9	0.758984	0.848864	0.141624	0.184065			-0.397859	-1.82759		KIAA0021 MCMP MDC9 MLTNG	Disintegrin and metalloproteinase domain-containing protein 9 OS=Homo sapiens OX=9606 GN=ADAM9 PE=1 SV=1	0	37.668	16	10	69	10	819	90.5	7.52	22.54	10	0	-0.392763	-0.664786	0.011844	-0.137784	0.145133	0.140522	0.171509	-0.0940946	0.18765
P62873	GNB1	1.04101	0.261533	0.547605	0.676085			0.0579794	0.656064			Guanine nucleotide-binding protein G(I)/G(S)/G(T) subunit beta-1 OS=Homo sapiens OX=9606 GN=GNB1 PE=1 SV=3	0	37.655	32	9	291	4	340	37.4	6	152.24	9	5	3.71034	3.70051	3.88018	3.60203	3.68566	3.8294	4.04433	3.44401	3.9471
Q8N6T3	ARFGAP1	0.707306	0.716544	0.192068	0.24171			-0.499593	-1.5675		ARF1GAP	ADP-ribosylation factor GTPase-activating protein 1 OS=Homo sapiens OX=9606 GN=ARFGAP1 PE=1 SV=2	0	37.616	34	9	65	9	406	44.6	5.66	30.99	9	0	-0.88014	-1.45314	-0.416902	-0.623608	-0.371521	-0.25628	0.204866	0.609966	0.145984
Q15008	PSMD6	0.844846	0.645489	0.22621	0.281698			-0.24324	-1.429		KIAA0107 PFAAP4	26S proteasome non-ATPase regulatory subunit 6 OS=Homo sapiens OX=9606 GN=PSMD6 PE=1 SV=1	0	37.61	28	10	62	10	389	45.5	5.62	18.05	10	0	-1.0829	-0.868712	-0.837553	-0.980465	-0.474215	-0.604768	-1.0209	-1.37956	-0.601576
P47813	EIF1AX	1.36342	0.952868	0.111463	0.152061			0.447225	2.03589		EIF1A EIF4C	Eukaryotic translation initiation factor 1A, X-chromosomal OS=Homo sapiens OX=9606 GN=EIF1AX PE=1 SV=2	0	37.596	65	8	116	8	144	16.5	5.24	43.08	8	0	2.08909	1.45512	2.13612	1.44338	1.43713	1.45816	1.18031	1.96186	1.66414
Q6NUK1	SLC25A24	0.873786	0.738676	0.182526	0.232283			-0.194647	-1.61074		APC1 MCSC1 SCAMC1	Mitochondrial adenyl nucleotide antiporter SLC25A24 OS=Homo sapiens OX=9606 GN=SLC25A24 PE=1 SV=2	0	37.586	23	9	152	9	477	53.3	6.33	61.15	9	0	1.89803	1.87695	1.86247	1.85512	2.27046	2.09581	2.05362	1.91119	1.95724
P28288	ABCD3	0.910511	2.03515	0.00922245	0.0321754	+	C33A_C93	-0.135251	-4.71252		PMP70 PXMP1	ATP-binding cassette sub-family D member 3 OS=Homo sapiens OX=9606 GN=ABCD3 PE=1 SV=1	0	37.501	18	10	155	10	659	75.4	9.36	59.21	10	0	0.714251	0.763842	0.795014	0.911359	0.907374	0.860127	0.682638	0.556405	0.485432
P56182	RRP1	1.06436	0.193059	0.641122	0.769601			0.0899913	0.50343		D21S2056E NNP1 NOP52 RRP1A	Ribosomal RNA processing protein 1 homolog A OS=Homo sapiens OX=9606 GN=RRP1 PE=1 SV=1	0	37.457	17	8	126	8	461	52.8	9.33	52.88	8	0	2.15455	2.37863	2.59535	2.48283	2.05266	2.32307	2.71743	2.80002	2.81453
Q9Y2X3	NOP58	1.62275	2.46712	0.00341102	0.0232792	+	C33A_C93	0.698441	6.21512	+	NOL5 NOP5	Nucleolar protein 58 OS=Homo sapiens OX=9606 GN=NOP58 PE=1 SV=1	0	37.439	24	9	107	9	529	59.5	8.92	43.69	9	0	1.1715	0.8709	1.11056	0.227664	0.384359	0.445611	1.09592	0.540921	1.15396
P26368	U2AF2	1.34304	1.34692	0.0449861	0.0795026			0.425499	2.8806		U2AF65	Splicing factor U2AF 65 kDa subunit OS=Homo sapiens OX=9606 GN=U2AF2 PE=1 SV=4	0	37.428	13	7	137	7	475	53.5	9.09	64.54	7	0	1.88025	1.88586	2.30072	1.65139	1.64062	1.49832	1.62064	1.66907	1.95467
P07996	THBS1	1.40148	0.693489	0.20254	0.254182			0.486955	1.52252		TSP TSP1	Thrombospondin-1 OS=Homo sapiens OX=9606 GN=THBS1 PE=1 SV=2	0	37.394	10	9	101	9	1170	129.3	4.94	38.95	9	0	-0.42114	-0.820716	-0.209638	-1.30575	-1.15888	-0.447732	0.111851	0.331861	0.12264
Q9UI10	EIF2B4	0.929509	0.522563	0.300218	0.373377			-0.105459	-1.18895		EIF2BD	Translation initiation factor eIF2B subunit delta OS=Homo sapiens OX=9606 GN=EIF2B4 PE=1 SV=2	0	37.392	23	9	165	9	523	57.5	9.38	51.48	9	0	1.28805	1.25889	1.31843	1.2487	1.38345	1.5496	1.12083	0.0287786	0.257122
P50991	CCT4	1.16193	1.62706	0.0236013	0.0528114			0.216526	3.55928		CCTD SRB	T-complex protein 1 subunit delta OS=Homo sapiens OX=9606 GN=CCT4 PE=1 SV=4	0	37.381	18	9	234	9	539	57.9	7.83	116.49	9	0	3.09504	2.9199	3.03565	2.78227	2.7553	2.86344	2.99112	2.5935	3.01549
P13667	PDIA4	0.576659	2.05157	0.00888041	0.03183	+	C33A_C93	-0.79421	-4.7638	+	ERP70 ERP72	Protein disulfide-isomerase A4 OS=Homo sapiens OX=9606 GN=PDIA4 PE=1 SV=2	0	37.351	19	10	105	10	645	72.9	5.07	37.05	10	0	-0.00466269	0.535104	0.381316	1.00914	1.15338	1.13186	0.715856	1.0188	0.764222
Q8N6R0	METTL13	1.56307	1.70324	0.0198045	0.0493643	+	C33A_C93	0.644385	3.75827	+	EEF1AKNMT FEAT KIAA0859	eEF1A lysine and N-terminal methyltransferase OS=Homo sapiens OX=9606 GN=METTL13 PE=1 SV=1	0	37.34	16	10	135	10	699	78.7	6.73	50.33	10	0	0.378071	0.562163	0.373816	0.0796122	-0.473015	-0.225702	0.447183	0.449989	0.602517
P00533	EGFR	0.635632	2.68421	0.00206912	0.0197273	+	C33A_C93	-0.653737	-7.1086	+	ERBB ERBB1 HER1	Epidermal growth factor receptor OS=Homo sapiens OX=9606 GN=EGFR PE=1 SV=2	0	37.332	9	10	152	9	1210	134.2	6.68	61.19	10	1	1.53889	1.32086	1.32596	1.9642	2.02429	2.15843	1.56577	0.993664	1.50421
P14314	PRKCSH	0.415482	2.17035	0.00675538	0.028846	+	C33A_C93	-1.26714	-5.14766	+	G19P1	Glucosidase 2 subunit beta OS=Homo sapiens OX=9606 GN=PRKCSH PE=1 SV=2	0	37.31	20	8	148	8	528	59.4	4.41	62.92	8	0	-0.237234	-0.845181	-0.548311	0.665264	1.04736	0.45807	0.0815818	0.150442	-0.0233383
Q96T37	RBM15	0.960914	0.240749	0.574448	0.702468			-0.0575206	-0.610613		OTT OTT1	RNA-binding protein 15 OS=Homo sapiens OX=9606 GN=RBM15 PE=1 SV=2	0	37.289	12	9	88	8	977	107.1	10.08	29.31	9	1	0.420864	0.279667	0.426471	0.283965	0.453016	0.562582	0.201752	0.131291	0.325444
Q9Y2X7	GIT1	0.751565	0.432279	0.369591	0.463989			-0.412031	-1.01009			ARF GTPase-activating protein GIT1 OS=Homo sapiens OX=9606 GN=GIT1 PE=1 SV=2	0	37.284	15	9	113	6	761	84.3	6.8	47.37	9	0	-2.06128	-1.01034	-0.810585	-0.657548	-0.894547	-1.09402	-0.211183	0.539888	0.242429
Q86U38	NOP9	1.39803	1.42006	0.0380139	0.0705371			0.483394	3.05039		C14orf21 KIAA2021	Nucleolar protein 9 OS=Homo sapiens OX=9606 GN=NOP9 PE=1 SV=1	0	37.279	22	8	92	8	636	69.4	7.28	35.11	8	0	-1.29331	-1.30638	-1.16706	-1.96314	-1.44877	-1.80503	-0.451797	-0.386354	-0.701181
Q9BS26	ERP44	0.700352	1.88948	0.0128979	0.0368582	+	C33A_C93	-0.513849	-4.27508	+	KIAA0573 TXNDC4	Endoplasmic reticulum resident protein 44 OS=Homo sapiens OX=9606 GN=ERP44 PE=1 SV=1	0	37.182	22	8	146	8	406	46.9	5.26	53.47	8	0	1.14948	1.47885	1.32878	1.6887	1.88137	1.92858	1.09449	0.883579	1.19119
Q9UBF2	COPG2	0.763912	1.52332	0.0299697	0.066179			-0.388521	-3.29871			Coatomer subunit gamma-2 OS=Homo sapiens OX=9606 GN=COPG2 PE=1 SV=1	0	37.127	17	10	75	10	871	97.6	5.81	25.62	10	0	0.03442	0.404967	0.357687	0.619159	0.66714	0.676338	0.456138	-0.453204	0.460476
P26358	DNMT1	10.8749	3.85659	0.000139126	0.00854545	+	C33A_C93	3.44294	14.2947	+	AIM CXXC9 DNMT	DNA (cytosine-5)-methyltransferase 1 OS=Homo sapiens OX=9606 GN=DNMT1 PE=1 SV=2	0	37.054	10	12	73	12	1616	183.1	7.75	18.59	12	0	-0.835236	-0.192514	-0.342344	-4.17656	-3.70258	-3.81976	-1.38529	-1.32513	-0.98415
Q13488	TCIRG1	0.516217	3.54057	0.000288023	0.0149041	+	C33A_C93	-0.95395	-11.8745	+	ATP6N1C ATP6V0A3	V-type proton ATPase 116 kDa subunit a 3 OS=Homo sapiens OX=9606 GN=TCIRG1 PE=1 SV=3	0	37	15	11	102	11	830	92.9	7.12	34.98	11	0	2.07304	2.15132	2.19514	3.00161	3.04415	3.23559	2.49908	2.19242	2.24332
Q96KP1	EXOC2	0.85235	1.3906	0.0406822	0.0728742			-0.230483	-2.98141		SEC5 SEC5L1	Exocyst complex component 2 OS=Homo sapiens OX=9606 GN=EXOC2 PE=1 SV=1	0	36.971	14	11	96	11	924	104	6.9	30.53	11	0	0.159151	0.358277	0.2177	0.379437	0.546607	0.500534	0.160726	-0.208243	0.218754
Q9Y4L1	HYOU1	0.711956	0.508231	0.310291	0.385134			-0.49014	-1.16077		GRP170 ORP150	Hypoxia up-regulated protein 1 OS=Homo sapiens OX=9606 GN=HYOU1 PE=1 SV=1	0	36.97	11	9	68	9	999	111.3	5.22	18.57	9	0	-0.607454	0.536863	-0.138144	-0.0199299	0.882636	0.398978	-0.278196	-0.644868	2.53857
Q14566	MCM6	1.17383	0.178212	0.663419	0.785665			0.231227	0.469109			DNA replication licensing factor MCM6 OS=Homo sapiens OX=9606 GN=MCM6 PE=1 SV=1	0	36.965	14	11	104	11	821	92.8	5.41	40.47	11	0	0.358341	-0.901164	0.3733	0.0929884	-0.186513	-0.769681	0.808819	1.0402	0.0908214
P40939	HADHA	1.18714	1.0404	0.0911165	0.131368			0.247492	2.21501		HADH	Trifunctional enzyme subunit alpha, mitochondrial OS=Homo sapiens OX=9606 GN=HADHA PE=1 SV=2	0	36.904	22	11	139	11	763	82.9	9.04	67.25	11	0	1.09532	1.22045	1.43105	1.10488	0.924382	0.975083	1.34111	1.0417	1.08517
P22087	FBL	1.16901	2.12064	0.00757458	0.0300577	+	C33A_C93	0.225292	4.98423		FIB1 FLRN	rRNA 2'-O-methyltransferase fibrillarin OS=Homo sapiens OX=9606 GN=FBL PE=1 SV=2	0	36.866	31	8	286	8	321	33.8	10.18	110.06	8	0	3.41467	3.3087	3.26347	3.11464	3.09414	3.10218	3.30854	2.78054	3.1647
Q13535	ATR	0.9762	0.139028	0.72606	0.836232			-0.0347512	-0.375926		FRP1	Serine/threonine-protein kinase ATR OS=Homo sapiens OX=9606 GN=ATR PE=1 SV=3	0	36.854	4	10	87	10	2644	301.2	7.43	23.72	10	0	-0.573709	-0.725851	-0.551425	-0.439483	-0.617026	-0.690222	-1.359	-1.3698	-1.10234
P83881	RPL36A	1.37646	1.76751	0.0170802	0.0446908	+	C33A_C93	0.460964	3.93159	+	RPL44	Large ribosomal subunit protein eL42 OS=Homo sapiens OX=9606 GN=RPL36A PE=1 SV=2	0	36.849	41	7	270	2	106	12.4	10.58	147.83	7	5	4.0785	4.01694	4.11105	3.74452	3.38158	3.6975	4.42965	3.77601	4.08781
P42285	MTREX	1.49411	0.969218	0.107345	0.149065			0.579282	2.06906		DOB1 KIAA0052 MTR4 SKIV2L2	Exosome RNA helicase MTR4 OS=Homo sapiens OX=9606 GN=MTREX PE=1 SV=3	0	36.786	10	9	106	9	1042	117.7	6.52	42.97	9	0	1.58227	0.989869	1.43385	0.335539	1.05304	0.879554	0.706047	0.754361	0.162356
Q8NFW8	CMAS	0.458037	1.26503	0.0543216	0.0893953			-1.12647	-2.69595	+		N-acylneuraminate cytidylyltransferase OS=Homo sapiens OX=9606 GN=CMAS PE=1 SV=2	0	36.782	24	8	111	8	434	48.3	7.93	45.45	8	0	-0.56723	0.471025	0.599737	1.48291	1.49614	0.903885	0.0629915	-0.314119	-0.0734844
P25054	APC	3.22949	1.43763	0.0365068	0.0690888			1.6913	3.0919	+	DP2.5	Adenomatous polyposis coli protein OS=Homo sapiens OX=9606 GN=APC PE=1 SV=2	0	36.747	5	10	79	10	2843	311.5	7.8	20.49	10	0	-2.12339	-1.64804	-1.37914	-3.7763	-2.4154	-4.03279	-1.15175	-0.485348	-1.72117
O43615	TIMM44	1.17401	1.16405	0.0685408	0.106297			0.231445	2.4755		MIMT44 TIM44	Mitochondrial import inner membrane translocase subunit TIM44 OS=Homo sapiens OX=9606 GN=TIMM44 PE=1 SV=2	0	36.722	25	10	100	10	452	51.3	8.32	30.38	10	0	0.175154	0.433384	0.297343	-0.0336001	0.16008	0.0850653	0.187164	0.0572576	0.0908003
Q9UNX3	RPL26L1	1.27689	1.47178	0.0337459	0.0684221			0.352635	3.17346		RPL26P1	Ribosomal protein uL24-like OS=Homo sapiens OX=9606 GN=RPL26L1 PE=1 SV=1	0	36.657	45	9	476	1	145	17.2	10.55	243.64	9	0	1.42569	1.0626	1.25489	0.880603	0.96469	0.839986	1.39886	0.965276	1.15536
Q86XP3	DDX42	1.17027	0.238672	0.577202	0.706059			0.226844	0.606031			ATP-dependent RNA helicase DDX42 OS=Homo sapiens OX=9606 GN=DDX42 PE=1 SV=1	0	36.652	14	10	98	10	938	102.9	7.02	32.64	10	0	0.0495529	-1.17052	-0.90332	-0.898188	-0.998146	-0.808485	-1.07846	-0.379619	-0.732016
O95613	PCNT	1.71585	0.19386	0.639941	0.769265			0.778926	0.505267		KIAA0402 PCNT2	Pericentrin OS=Homo sapiens OX=9606 GN=PCNT PE=1 SV=4	0	36.626	4	13	69	13	3336	377.8	5.55	18.26	13	0	-0.398769	-0.413387	-3.05237	0.46118	-3.29653	-3.36595	0.265908	-2.76443	-3.04617
O94925	GLS	0.894324	0.228971	0.59024	0.717967			-0.16113	-0.584537		GLS1 KIAA0838	Glutaminase kidney isoform, mitochondrial OS=Homo sapiens OX=9606 GN=GLS PE=1 SV=1	0	36.615	16	8	75	8	669	73.4	7.77	28.13	8	0	0.144262	1.07734	0.479697	0.751908	0.651992	0.780788	0.57536	0.654707	0.734665
P61221	ABCE1	0.930134	0.264219	0.544228	0.673363			-0.104489	-0.66189		RLI RNASEL1 RNASELI RNS4I	ATP-binding cassette sub-family E member 1 OS=Homo sapiens OX=9606 GN=ABCE1 PE=1 SV=1	0	36.602	15	9	148	9	599	67.3	8.34	50.02	9	0	1.35907	0.92833	0.882859	1.17401	1.08018	1.22954	0.89003	0.441884	0.653444
Q68E01	INTS3	0.974909	0.0836414	0.824819	0.912315			-0.03666	-0.236283		C1orf193 C1orf60	Integrator complex subunit 3 OS=Homo sapiens OX=9606 GN=INTS3 PE=1 SV=1	0	36.598	13	8	106	8	1043	118	5.8	31.05	8	0	-0.203449	-0.358292	-0.465639	-0.53669	-0.0684522	-0.312258	-0.845795	-1.60763	-0.670372
Q15418	RPS6KA1	0.628212	0.64924	0.224264	0.279525			-0.670677	-1.43631		MAPKAPK1A RSK1	Ribosomal protein S6 kinase alpha-1 OS=Homo sapiens OX=9606 GN=RPS6KA1 PE=1 SV=2	0	36.476	15	9	72	7	735	82.7	7.83	24.23	9	2	1.30239	1.23087	1.19515	1.44487	2.84523	1.45033	1.14901	1.04473	1.18086
Q5JTW2	CEP78	2.35726	0.895354	0.127247	0.166428			1.23711	1.92017		C9orf81	Centrosomal protein of 78 kDa OS=Homo sapiens OX=9606 GN=CEP78 PE=1 SV=1	0	36.339	15	9	93	9	689	76.3	8.18	29.85	9	0	-0.696664	-0.728792	-0.965446	-3.08879	-0.882706	-2.13074	-2.14013	-1.75816	-1.69789
Q7Z4F1	LRP10	0.827187	0.344094	0.4528	0.570057			-0.273714	-0.830799			Low-density lipoprotein receptor-related protein 10 OS=Homo sapiens OX=9606 GN=LRP10 PE=1 SV=2	0	36.33	22	8	170	8	713	76.1	5.52	65.44	8	0	2.69992	1.97798	1.80918	2.78918	2.16861	2.35043	2.18645	0.952947	2.26187
Q63ZY3	KANK2	1.08251	0.613222	0.243656	0.300939			0.114384	1.36615		ANKRD25 KIAA1518 MXRA3 SIP	KN motif and ankyrin repeat domain-containing protein 2 OS=Homo sapiens OX=9606 GN=KANK2 PE=1 SV=1	0	36.268	13	9	127	9	851	91.1	5.63	53.96	9	0	0.300724	0.482447	0.282681	0.271037	0.135609	0.316055	0.502914	0.474161	0.021031
O00231	PSMD11	0.942451	0.152471	0.70393	0.816073			-0.0855103	-0.408352			26S proteasome non-ATPase regulatory subunit 11 OS=Homo sapiens OX=9606 GN=PSMD11 PE=1 SV=3	0	36.266	24	9	147	9	422	47.4	6.48	56.36	9	0	0.770588	1.19864	0.735655	0.698807	1.07904	1.18356	0.540495	0.860501	1.19732
Q15678	PTPN14	1.01218	0.0189967	0.957201	0.97783			0.0174646	0.0571037		PEZ PTPD2	Tyrosine-protein phosphatase non-receptor type 14 OS=Homo sapiens OX=9606 GN=PTPN14 PE=1 SV=2	0	36.246	13	10	94	10	1187	135.2	8.31	25.05	10	0	0.112755	-0.604015	-0.27939	0.125484	-0.295675	-0.652854	-0.00285545	0.205184	0.267262
P51149	RAB7A	0.762954	2.32592	0.00472153	0.0251529	+	C33A_C93	-0.390333	-5.68673	+	RAB7	Ras-related protein Rab-7a OS=Homo sapiens OX=9606 GN=RAB7A PE=1 SV=1	0	36.23	48	9	221	9	207	23.5	6.7	98.16	9	0	3.39424	3.35065	3.19582	3.67212	3.76981	3.66976	3.47267	2.86209	3.17694
O14981	BTAF1	1.22778	0.452605	0.352692	0.443565			0.296056	1.05068		TAF172	TATA-binding protein-associated factor 172 OS=Homo sapiens OX=9606 GN=BTAF1 PE=1 SV=2	0	36.211	7	11	96	11	1849	206.8	6.52	26.54	11	0	-0.970037	-1.61391	-1.90525	-1.76444	-1.71376	-1.89917	-2.12526	-2.13518	-2.31613
O43824	GTPBP6	1.37619	1.18806	0.0648548	0.103309			0.460683	2.52724		PGPL	Putative GTP-binding protein 6 OS=Homo sapiens OX=9606 GN=GTPBP6 PE=1 SV=4	0	36.145	22	10	133	10	516	56.9	9.42	50.02	10	0	2.07854	1.93832	1.65871	1.2695	1.32654	1.69748	2.17474	1.30301	1.50573
Q99439	CNN2	1.4506	0.941321	0.114467	0.154256			0.536653	2.01254			Calponin-2 OS=Homo sapiens OX=9606 GN=CNN2 PE=1 SV=4	0	36.123	28	8	201	7	309	33.7	7.33	99.74	8	0	1.7462	1.76392	1.9432	0.767951	1.47505	1.60037	2.67559	3.08689	2.58045
P00387	CYB5R3	1.00733	0.0070709	0.98385	0.991744			0.0105368	0.0215348		DIA1	NADH-cytochrome b5 reductase 3 OS=Homo sapiens OX=9606 GN=CYB5R3 PE=1 SV=3	0	36.121	34	8	125	8	301	34.2	7.59	29.34	8	0	3.48729	2.24947	2.87045	3.50206	2.6935	2.38004	2.71975	1.54401	2.33876
P48729	CSNK1A1	0.808658	1.41784	0.0382084	0.071			-0.306398	-3.04517			Casein kinase I isoform alpha OS=Homo sapiens OX=9606 GN=CSNK1A1 PE=1 SV=2	0	36.055	22	8	120	8	337	38.9	9.57	49.14	8	0	2.64973	2.30951	2.51115	2.79835	2.82878	2.76244	2.61254	2.11829	2.47843
Q9NXW2	DNAJB12	0.987646	0.0609412	0.869078	0.939487			-0.0179345	-0.175683			DnaJ homolog subfamily B member 12 OS=Homo sapiens OX=9606 GN=DNAJB12 PE=1 SV=5	0	36.036	29	9	159	9	375	41.8	8.69	54.12	9	0	-0.0846988	-0.0262636	-0.11749	0.0403975	-0.255289	0.0402427	-0.340822	-0.162902	-0.416347
Q01105	SET	0.784324	0.526258	0.297675	0.370064			-0.350478	-1.1962			Protein SET OS=Homo sapiens OX=9606 GN=SET PE=1 SV=3	0	36.03	31	9	145	9	290	33.5	4.32	67.09	9	0	2.43681	2.53572	3.34818	3.21695	3.10894	3.04624	3.17375	4.04659	3.25928
Q8TB52	FBXO30	1.1962	0.387156	0.410057	0.518124			0.258454	0.91909		FBX30	F-box only protein 30 OS=Homo sapiens OX=9606 GN=FBXO30 PE=1 SV=3	0	36.009	18	9	139	9	745	82.3	5.4	58.07	9	0	1.57929	0.747759	1.48904	0.884721	0.949158	1.20684	1.47262	0.803528	1.08354
Q8N1G4	LRRC47	0.963479	0.126151	0.74791	0.85265			-0.0536742	-0.344371		KIAA1185	Leucine-rich repeat-containing protein 47 OS=Homo sapiens OX=9606 GN=LRRC47 PE=1 SV=1	0	36.007	20	10	145	10	583	63.4	8.28	60.74	10	0	0.959801	1.28007	0.874517	1.06119	0.944457	1.26976	0.647087	-1.06864	0.32136
Q14596	NBR1	0.983638	0.0372053	0.917899	0.963855			-0.0238011	-0.109743		1A13B KIAA0049 M17S2	Next to BRCA1 gene 1 protein OS=Homo sapiens OX=9606 GN=NBR1 PE=1 SV=3	0	35.947	9	8	150	8	966	107.3	5.12	53.25	8	0	1.87775	1.66307	1.41072	2.01072	1.46628	1.54595	1.44735	0.767277	1.18073
P26640	VARS1	1.07387	0.344066	0.452828	0.569842			0.102826	0.830743		G7A VARS VARS2	Valine--tRNA ligase OS=Homo sapiens OX=9606 GN=VARS1 PE=1 SV=4	0	35.934	9	10	105	10	1264	140.4	7.59	43.08	10	0	-0.223951	-0.189383	-0.308137	-0.305316	-0.159468	-0.565166	0.0142848	0.27718	-0.201797
Q08AM6	VAC14	0.691955	0.749855	0.177887	0.226884			-0.53125	-1.63261		TAX1BP2 TRX	Protein VAC14 homolog OS=Homo sapiens OX=9606 GN=VAC14 PE=1 SV=1	0	35.926	17	10	81	10	782	87.9	6.13	30.11	10	0	-1.14064	-1.39006	-0.451807	-0.792533	-0.297949	-0.298275	-0.268447	-0.898416	-1.10701
P15559	NQO1	1.42784	2.32712	0.00470852	0.0252271	+	C33A_C93	0.513831	5.69106	+	DIA4 NMOR1	NAD(P)H dehydrogenase [quinone] 1 OS=Homo sapiens OX=9606 GN=NQO1 PE=1 SV=1	0	35.884	28	8	153	8	274	30.8	8.88	71.21	8	0	2.82248	3.12237	2.95885	2.40519	2.48943	2.46759	2.81161	2.75427	2.78633
P40429	RPL13A	1.15825	0.891467	0.128391	0.167725			0.211943	1.9124			Large ribosomal subunit protein uL13 OS=Homo sapiens OX=9606 GN=RPL13A PE=1 SV=2	0	35.878	31	7	696	7	203	23.6	10.93	375.28	7	0	6.64597	6.37061	6.43765	6.35237	6.12587	6.34016	6.6435	5.93353	6.32258
P11387	TOP1	1.12691	0.537416	0.290124	0.359632			0.172373	1.21809			DNA topoisomerase 1 OS=Homo sapiens OX=9606 GN=TOP1 PE=1 SV=2	0	35.868	13	9	137	9	765	90.7	9.31	62.39	9	0	1.56258	1.63784	1.59563	1.20943	1.38186	1.68764	1.565	1.27507	1.36708
P62258	YWHAE	0.896739	1.03574	0.0920993	0.132751			-0.15724	-2.20538			14-3-3 protein epsilon OS=Homo sapiens OX=9606 GN=YWHAE PE=1 SV=1	0	35.75	33	8	143	7	255	29.2	4.74	82.3	8	0	2.75147	2.64484	2.67194	2.76896	2.79803	2.97298	2.72438	2.62006	2.65305
Q9BVQ7	AFG2B	0.596554	1.00794	0.0981888	0.140235			-0.745275	-2.14812		SPATA5L1	ATPase family gene 2 protein homolog B OS=Homo sapiens OX=9606 GN=AFG2B PE=1 SV=2	0	35.713	16	9	123	9	753	80.7	8.09	44.28	9	0	-0.729389	-0.587356	-0.622446	0.440515	0.445843	-0.589723	-0.415283	-0.463396	-0.701775
Q03468	ERCC6	1.26362	0.309241	0.490635	0.610357			0.337563	0.758038		CSB	DNA excision repair protein ERCC-6 OS=Homo sapiens OX=9606 GN=ERCC6 PE=1 SV=1	0	35.71	7	10	123	10	1493	168.3	8.09	39.94	10	0	0.28027	-0.0837732	-0.501736	-0.0650781	-1.20672	-0.0461284	-0.516675	-1.27096	-0.537754
Q969Q0	RPL36AL	1.23181	0.539586	0.288678	0.358226			0.300784	1.22234			Ribosomal protein eL42-like OS=Homo sapiens OX=9606 GN=RPL36AL PE=1 SV=3	0	35.677	41	7	166	2	106	12.5	10.65	91.2	7	0	0.955116	0.604957	0.784771	0.883817	0.450205	0.10847	0.852052	0.145629	0.508332
Q13151	HNRNPA0	0.870959	1.40031	0.0397822	0.0721392			-0.199324	-3.00407		HNRPA0	Heterogeneous nuclear ribonucleoprotein A0 OS=Homo sapiens OX=9606 GN=HNRNPA0 PE=1 SV=1	0	35.618	34	8	166	8	305	30.8	9.29	82.94	8	0	2.16409	2.07933	2.28159	2.3575	2.43449	2.33099	2.55653	2.44206	2.24065
P40222	TXLNA	1.10961	0.69814	0.200382	0.252035			0.150056	1.53159		TXLN	Alpha-taxilin OS=Homo sapiens OX=9606 GN=TXLNA PE=1 SV=3	0	35.613	16	7	141	6	546	61.9	6.52	60.64	7	0	0.849606	0.894447	1.14446	0.804319	0.757859	0.876171	1.10679	0.45169	0.987132
P49642	PRIM1	0.988444	0.0194436	0.956217	0.977649			-0.0167696	-0.058419			DNA primase small subunit OS=Homo sapiens OX=9606 GN=PRIM1 PE=1 SV=1	0	35.547	27	9	79	9	420	49.9	8.21	25.15	9	0	2.77356	2.46709	3.38263	2.86649	3.07548	2.73161	4.23568	4.54304	4.22146
Q13206	DDX10	1.33133	0.898389	0.12636	0.166107			0.412868	1.92624			Probable ATP-dependent RNA helicase DDX10 OS=Homo sapiens OX=9606 GN=DDX10 PE=1 SV=2	0	35.521	12	10	97	10	875	100.8	8.63	31.26	10	0	-0.59575	-0.284347	-0.402502	-1.19002	-0.519177	-0.812013	-0.288066	-2.18832	-1.38111
Q6P1J9	CDC73	1.32346	1.67208	0.0212773	0.0510997			0.404311	3.67607		C1orf28 HRPT2	Parafibromin OS=Homo sapiens OX=9606 GN=CDC73 PE=1 SV=1	0	35.517	19	9	106	9	531	60.5	9.61	34.19	9	0	0.633861	0.778217	0.506646	0.0893525	0.265091	0.351347	0.779984	1.19578	0.981785
Q29RF7	PDS5A	1.87734	0.21752	0.606011	0.732817			0.908691	0.558946		KIAA0648 PDS5	Sister chromatid cohesion protein PDS5 homolog A OS=Homo sapiens OX=9606 GN=PDS5A PE=1 SV=1	0	35.449	12	11	44	11	1337	150.7	7.91	11.67	11	0	-1.07122	-2.40023	-3.18334	-0.88598	-2.50895	-5.98593	-1.5471	-1.29557	-0.813845
O00299	CLIC1	0.898265	0.742622	0.180875	0.229037			-0.154787	-1.61846		G6 NCC27	Chloride intracellular channel protein 1 OS=Homo sapiens OX=9606 GN=CLIC1 PE=1 SV=4	0	35.258	53	8	145	8	241	26.9	5.17	72.47	8	0	1.84959	2.04095	1.7606	1.94484	2.06688	2.10377	1.70271	1.46273	1.66567
Q7Z333	SETX	0.967017	0.0456756	0.90017	0.954829			-0.0483861	-0.133602		ALS4 KIAA0625 SCAR1	Probable helicase senataxin OS=Homo sapiens OX=9606 GN=SETX PE=1 SV=4	0	35.233	5	12	85	12	2677	302.7	7.17	22.5	12	0	-1.45824	-2.48203	-1.51055	-1.85848	-1.4891	-1.95808	-2.20129	-2.48766	-3.05862
O15541	RNF113A	3.37586	1.91875	0.0120573	0.0368201	+	C33A_C93	1.75526	4.36051	+	RNF113 ZNF183	E3 ubiquitin-protein ligase RNF113A OS=Homo sapiens OX=9606 GN=RNF113A PE=1 SV=1	0	35.214	36	8	110	8	343	38.8	5.69	42.38	8	0	0.6945	0.629382	0.609052	-1.79124	-0.400651	-1.14094	1.54115	2.32024	1.40661
Q96P11	NSUN5	4.87774	1.98287	0.0104023	0.0349791	+	C33A_C93	2.28621	4.55194	+	NSUN5A WBSCR20 WBSCR20A	28S rRNA (cytosine-C(5))-methyltransferase OS=Homo sapiens OX=9606 GN=NSUN5 PE=1 SV=2	0	35.206	24	9	71	9	429	46.7	8.62	28.32	9	0	-0.552631	0.22185	-0.197094	-2.78308	-3.0292	-1.57423	-0.088412	-0.350116	-0.796093
Q14126	DSG2	0.674782	2.3317	0.00465911	0.0251856	+	C33A_C93	-0.567507	-5.70761	+	CDHF5	Desmoglein-2 OS=Homo sapiens OX=9606 GN=DSG2 PE=1 SV=2	0	35.191	11	8	162	8	1118	122.2	5.24	70.63	8	0	2.19868	2.10384	1.91306	2.54642	2.64091	2.73077	2.1001	0.726916	1.46313
Q6IAN0	DHRS7B	1.38148	1.18012	0.0660511	0.104051			0.466215	2.51009		SDR32C1	Dehydrogenase/reductase SDR family member 7B OS=Homo sapiens OX=9606 GN=DHRS7B PE=1 SV=2	0	35.18	27	8	58	8	325	35.1	9.55	18.35	8	0	-0.214908	-0.047579	-0.128095	-0.308211	-0.925433	-0.555582	0	-0.607856	-0.301619
Q13043	STK4	1.06423	0.638774	0.229734	0.286159			0.0898167	1.41593		KRS2 MST1	Serine/threonine-protein kinase 4 OS=Homo sapiens OX=9606 GN=STK4 PE=1 SV=2	0	35.121	17	8	122	8	487	55.6	5.07	49.86	8	0	1.5321	1.51046	1.66789	1.42602	1.45672	1.55826	1.84526	2.09054	1.5922
Q9Y6M4	CSNK1G3	0.880522	0.655361	0.221126	0.276424			-0.183569	-1.44823			Casein kinase I isoform gamma-3 OS=Homo sapiens OX=9606 GN=CSNK1G3 PE=1 SV=2	0	35.038	21	9	153	2	447	51.4	9.22	61.83	9	3	1.46583	1.14767	1.29064	1.48294	1.33495	1.63696	1.46502	0.772744	1.24453
Q13243	SRSF5	1.30146	2.13634	0.00730566	0.028197	+	C33A_C93	0.380126	5.0354	+	HRS SFRS5 SRP40	Serine/arginine-rich splicing factor 5 OS=Homo sapiens OX=9606 GN=SRSF5 PE=1 SV=1	0	35.036	28	9	209	8	272	31.2	11.59	84.07	9	0	2.73279	2.48807	2.64995	2.22397	2.28955	2.21692	2.36967	2.20746	2.21222
Q92541	RTF1	0.762325	1.90203	0.0125307	0.0362193	+	C33A_C93	-0.391522	-4.31155		KIAA0252	RNA polymerase-associated protein RTF1 homolog OS=Homo sapiens OX=9606 GN=RTF1 PE=1 SV=4	0	35.033	14	9	113	9	710	80.3	8.15	33.63	9	0	-0.561972	-0.562534	-0.419325	0.0093988	-0.258353	-0.12031	-0.505609	-0.353789	-0.544962
Q96SZ6	CDK5RAP1	1.37634	1.37919	0.0417652	0.0745022			0.460841	2.95491		C20orf34	Mitochondrial tRNA methylthiotransferase CDK5RAP1 OS=Homo sapiens OX=9606 GN=CDK5RAP1 PE=1 SV=2	0	35.011	16	8	96	8	601	67.6	8.21	32.76	8	0	0.00968933	0.148515	-0.0334725	-0.241012	-0.70863	-0.30815	0.00702062	0.0346452	-0.0384731
Q13242	SRSF9	0.869111	1.40991	0.0389122	0.0714733			-0.202388	-3.02655		SFRS9 SRP30C	Serine/arginine-rich splicing factor 9 OS=Homo sapiens OX=9606 GN=SRSF9 PE=1 SV=1	0	34.998	41	9	194	8	221	25.5	8.65	102.85	9	0	3.48556	3.40115	3.58482	3.73668	3.61163	3.73037	3.73714	3.61168	3.42847
Q9UII4	HERC5	1.42397	2.03258	0.00927722	0.0320349	+	C33A_C93	0.509918	4.70453	+	CEB1 CEBP1	E3 ISG15--protein ligase HERC5 OS=Homo sapiens OX=9606 GN=HERC5 PE=1 SV=2	0	34.927	15	11	98	11	1024	116.8	7.65	27.2	11	0	-0.190306	-0.123273	-0.0570494	-0.469198	-0.61279	-0.818394	-0.723901	-0.47535	-0.419245
O00303	EIF3F	0.810052	0.853707	0.140053	0.18268			-0.303914	-1.8372		EIF3S5	Eukaryotic translation initiation factor 3 subunit F OS=Homo sapiens OX=9606 GN=EIF3F PE=1 SV=1	0	34.884	32	8	174	8	357	37.5	5.45	86.45	8	0	2.76122	2.52161	2.90015	2.96853	3.26912	2.85707	1.86573	1.96152	1.90532
Q5TC82	RC3H1	4.22677	0.847658	0.142018	0.184787			2.07955	1.82519		KIAA2025 RNF198	Roquin-1 OS=Homo sapiens OX=9606 GN=RC3H1 PE=1 SV=1	0	34.869	13	8	61	7	1133	125.7	7.27	18.75	8	0	-0.277963	0.0722205	0.405726	-4.22904	-1.2115	-0.598136	0.135343	1.27959	0.183914
P62244	RPS15A	1.29438	1.5111	0.0308248	0.0662762			0.372266	3.26877			Small ribosomal subunit protein uS8 OS=Homo sapiens OX=9606 GN=RPS15A PE=1 SV=2	0	34.798	40	7	494	7	130	14.8	10.13	209.22	7	0	6.03805	6.04906	5.87168	5.66732	5.42333	5.75135	6.01838	5.54514	5.85436
P25490	YY1	1.03456	0.0706419	0.849881	0.927485			0.049011	0.201854		INO80S	Transcriptional repressor protein YY1 OS=Homo sapiens OX=9606 GN=YY1 PE=1 SV=2	0	34.732	25	9	107	9	414	44.7	6.25	37.68	9	0	-0.658903	0.0775316	-0.158	-0.232672	-0.50701	-0.146723	-0.474511	-1.99419	-0.559586
Q53H12	AGK	1.79987	0.594491	0.254395	0.31566			0.847892	1.32964		MULK	Acylglycerol kinase, mitochondrial OS=Homo sapiens OX=9606 GN=AGK PE=1 SV=2	0	34.716	33	9	116	9	422	47.1	8.09	59.59	9	0	2.05533	2.05953	1.5354	1.3598	-0.15141	1.89819	1.14674	2.71194	1.6131
P54920	NAPA	0.960537	0.228305	0.591146	0.719011			-0.0580874	-0.583055		SNAPA	Alpha-soluble NSF attachment protein OS=Homo sapiens OX=9606 GN=NAPA PE=1 SV=3	0	34.624	38	7	91	7	295	33.2	5.36	32.11	7	0	0.607966	0.620645	0.369322	0.495924	0.583467	0.692806	0.763031	0.242669	0.722925
Q9UJV9	DDX41	0.826287	2.61802	0.00240979	0.0209	+	C33A_C93	-0.275285	-6.82511		ABS	Probable ATP-dependent RNA helicase DDX41 OS=Homo sapiens OX=9606 GN=DDX41 PE=1 SV=2	0	34.571	18	9	126	9	622	69.8	6.84	45.76	9	0	1.28384	1.17803	1.26751	1.50205	1.56447	1.4887	0.77133	0.473461	0.662391
Q9UNM6	PSMD13	0.991668	0.03398	0.924741	0.966228			-0.0120705	-0.100557			26S proteasome non-ATPase regulatory subunit 13 OS=Homo sapiens OX=9606 GN=PSMD13 PE=1 SV=2	0	34.552	28	9	95	9	376	42.9	5.81	39.85	9	0	1.03151	1.26622	1.1545	1.00818	1.34741	1.13285	0.762772	1.03275	0.861341
P39656	DDOST	0.699958	2.73948	0.00182189	0.0188317	+	C33A_C93	-0.514659	-7.35315	+	KIAA0115 OST48	Dolichyl-diphosphooligosaccharide--protein glycosyltransferase 48 kDa subunit OS=Homo sapiens OX=9606 GN=DDOST PE=1 SV=4	0	34.532	24	8	177	8	456	50.8	6.55	81.83	8	0	2.3556	2.53956	2.45195	2.87588	3.02873	2.98648	2.16114	2.35181	2.42873
P62910	RPL32	1.17256	1.05624	0.0878545	0.12856			0.229667	2.24785			Large ribosomal subunit protein eL32 OS=Homo sapiens OX=9606 GN=RPL32 PE=1 SV=2	0	34.53	47	8	288	8	135	15.9	11.33	140.99	8	0	5.15934	4.97519	5.00975	4.90065	4.64822	4.90641	5.15267	4.13387	4.98838
P50416	CPT1A	1.45631	2.74294	0.00180742	0.0191156	+	C33A_C93	0.542316	7.36871	+	CPT1	Carnitine O-palmitoyltransferase 1, liver isoform OS=Homo sapiens OX=9606 GN=CPT1A PE=1 SV=2	0	34.528	13	9	131	9	773	88.3	8.65	52.68	9	0	1.01943	0.882069	1.07667	0.430347	0.383337	0.537544	0.961365	0.622045	0.909751
Q99848	EBNA1BP2	1.13083	0.693443	0.202561	0.254096			0.177387	1.52243		EBP2	Probable rRNA-processing protein EBP2 OS=Homo sapiens OX=9606 GN=EBNA1BP2 PE=1 SV=2	0	34.43	28	7	113	7	306	34.8	10.1	44.06	7	0	2.01003	1.70213	1.74969	1.6444	1.52751	1.75777	1.54499	1.30921	1.59625
Q12797	ASPH	1.01702	0.0393535	0.91337	0.961294			0.0243415	0.11583		BAH	Aspartyl/asparaginyl beta-hydroxylase OS=Homo sapiens OX=9606 GN=ASPH PE=1 SV=3	0	34.4	14	10	172	10	758	85.8	5.01	88.09	10	0	1.04674	1.66924	1.63933	1.38047	1.53794	1.3639	1.79035	1.14521	1.61391
Q9UHX1	PUF60	1.20533	1.17126	0.0674129	0.104753			0.269432	2.49099		FIR ROBPI SIAHBP1	Poly(U)-binding-splicing factor PUF60 OS=Homo sapiens OX=9606 GN=PUF60 PE=1 SV=1	0	34.354	21	9	135	9	559	59.8	5.29	55.95	9	0	2.128	1.90301	2.09293	1.74389	1.92679	1.64497	1.83017	1.90909	1.69305
Q99700	ATXN2	1.93517	1.25668	0.055376	0.0913359			0.952463	2.67744	+	ATX2 SCA2 TNRC13	Ataxin-2 OS=Homo sapiens OX=9606 GN=ATXN2 PE=1 SV=2	0	34.287	9	9	134	9	1313	140.2	9.57	41.16	9	0	0.119022	-0.0347498	0.197723	-0.480156	-1.55588	-0.539359	0.249665	0.155451	-0.00499344
O95373	IPO7	0.811178	1.49865	0.0317211	0.066596			-0.30191	-3.23843		RANBP7	Importin-7 OS=Homo sapiens OX=9606 GN=IPO7 PE=1 SV=1	0	34.226	9	7	198	7	1038	119.4	4.82	96.04	7	0	3.12674	2.97215	2.83051	3.21111	3.28503	3.339	2.89447	2.50161	2.82516
Q04864	REL	1.07639	0.346603	0.450191	0.567986			0.106199	0.835989			Proto-oncogene c-Rel OS=Homo sapiens OX=9606 GN=REL PE=1 SV=1	0	34.191	21	10	83	10	619	68.5	5.86	29.63	10	0	-0.696099	-1.00574	-0.809481	-0.869199	-0.839823	-1.1209	0.152323	0.998768	0.432344
Q7Z3C6	ATG9A	0.592969	2.15661	0.00697258	0.0279799	+	C33A_C93	-0.753973	-5.10206	+	APG9L1	Autophagy-related protein 9A OS=Homo sapiens OX=9606 GN=ATG9A PE=1 SV=3	0	34.173	13	7	76	7	839	94.4	6.67	20.44	7	0	-0.871087	-0.589214	-0.716003	-0.156678	-0.0197675	0.262059	-1.16951	-0.612014	-0.240047
P16871	IL7R	1.20248	0.653927	0.221857	0.276708			0.266012	1.44544			Interleukin-7 receptor subunit alpha OS=Homo sapiens OX=9606 GN=IL7R PE=1 SV=3	0	34.167	27	8	97	8	459	51.5	5.44	34.65	8	0	-0.209172	-0.0199204	0.410483	-0.18306	-0.197066	-0.236519	0.45552	-0.953215	-0.881363
Q96T51	RUFY1	0.806925	0.814137	0.153413	0.197025			-0.309493	-1.7589		RABIP4 ZFYVE12	RUN and FYVE domain-containing protein 1 OS=Homo sapiens OX=9606 GN=RUFY1 PE=1 SV=2	0	34.143	15	9	98	8	708	79.8	5.74	39.08	9	1	-0.0264622	0.152945	0.28821	0.148384	0.569767	0.625021	0.0773813	0.131596	0.088685
P61353	RPL27	1.15834	0.704684	0.197386	0.247984			0.212062	1.54435			Large ribosomal subunit protein eL27 OS=Homo sapiens OX=9606 GN=RPL27 PE=1 SV=2	0	34.137	43	5	111	5	136	15.8	10.56	54.4	5	0	3.28514	3.05675	2.87692	2.98688	2.74494	2.8508	3.08304	2.36132	2.86327
P08134	RHOC	1.42421	0.336167	0.46114	0.575955			0.51016	0.814363		ARH9 ARHC	Rho-related GTP-binding protein RhoC OS=Homo sapiens OX=9606 GN=RHOC PE=1 SV=1	0	34.104	35	6	166	1	193	22	6.58	64.26	6	0	-0.163238	-0.22328	-0.215491	-0.652737	0.343513	-1.82326	-4.37723	-1.40033	-1.14894
Q9NVN8	GNL3L	1.47946	2.39883	0.00399184	0.0227134	+	C33A_C93	0.565074	5.95469	+		Guanine nucleotide-binding protein-like 3-like protein OS=Homo sapiens OX=9606 GN=GNL3L PE=1 SV=1	0	34.104	19	8	143	8	582	65.5	8.44	60.34	8	0	1.50361	1.30569	1.24026	0.845888	0.680654	0.827802	1.42308	0.777647	1.21397
O60832	DKC1	1.3959	1.47611	0.0334112	0.0681187			0.481196	3.18387		NOLA4	H/ACA ribonucleoprotein complex subunit DKC1 OS=Homo sapiens OX=9606 GN=DKC1 PE=1 SV=3	0	34.097	19	7	72	7	514	57.6	9.42	16.88	7	0	-0.586548	-0.703626	-0.633924	-1.38467	-0.875185	-1.10783	-0.913526	-1.20325	-1.26697
P57764	GSDMD	0.918355	0.354287	0.442296	0.557176			-0.122876	-0.851847		DFNA5L GSDMDC1	Gasdermin-D OS=Homo sapiens OX=9606 GN=GSDMD PE=1 SV=1	0	34	24	8	96	8	484	52.8	5.08	42.18	8	0	0.950727	0.976448	0.654869	0.965444	0.818716	1.16651	0.907205	0.763755	1.3176
Q96A49	SYAP1	0.916228	0.40121	0.397	0.502511			-0.126221	-0.94758			Synapse-associated protein 1 OS=Homo sapiens OX=9606 GN=SYAP1 PE=1 SV=1	0	33.996	32	7	80	7	352	39.9	4.53	23.1	7	0	-0.449897	-0.244228	-0.632063	-0.443735	-0.309445	-0.194345	-0.0329388	0.0556128	-0.26618
Q9BV44	THUMPD3	1.00048	0.002061	0.995266	0.997009			0.000689998	0.00631255			tRNA (guanine(6)-N2)-methyltransferase THUMP3 OS=Homo sapiens OX=9606 GN=THUMPD3 PE=1 SV=1	0	33.99	24	10	80	10	507	57	6.37	31.67	10	0	-0.208964	-0.499828	-0.199165	-0.263849	-0.24899	-0.397189	-0.223313	-0.0516076	-0.00902176
O00469	PLOD2	0.741062	1.85123	0.0140853	0.0389751	+	C33A_C93	-0.432335	-4.16524	+		Procollagen-lysine,2-oxoglutarate 5-dioxygenase 2 OS=Homo sapiens OX=9606 GN=PLOD2 PE=1 SV=2	0	33.965	14	8	120	8	737	84.6	6.71	52.11	8	0	0.668755	0.7445	0.423294	1.03161	0.987709	1.11423	0.351364	0.31313	0.299455
P09884	POLA1	7.59654	3.12575	0.000748601	0.0152131	+	C33A_C93	2.92534	9.28452	+	POLA	DNA polymerase alpha catalytic subunit OS=Homo sapiens OX=9606 GN=POLA1 PE=1 SV=2	0	33.964	9	11	104	11	1462	165.8	5.85	33.78	11	0	-0.837755	-0.9174	-0.137528	-3.37772	-3.34587	-3.94512	-1.62708	0.00615501	-0.739016
Q96SI9	STRBP	1.03366	0.0694981	0.852122	0.92898			0.0477672	0.19879		SPNR	Spermatid perinuclear RNA-binding protein OS=Homo sapiens OX=9606 GN=STRBP PE=1 SV=1	0	33.954	8	6	171	3	672	73.6	8.72	65.35	6	0	0.0661259	0.511017	0.505407	0.504471	0.501273	-0.0664964	0.482015	0.834728	0.493454
Q8NBJ5	COLGALT1	0.479553	4.63836	2.29952e-05	0.0115556	+	C33A_C93	-1.06024	-22.5272	+	GLT25D1	Procollagen galactosyltransferase 1 OS=Homo sapiens OX=9606 GN=COLGALT1 PE=1 SV=1	0	33.935	16	9	137	9	622	71.6	7.31	56.3	9	0	0.919052	1.01354	0.955717	1.98776	1.98194	2.09932	0.738407	0.895807	0.961046
Q8NF37	LPCAT1	0.852584	1.08555	0.0821194	0.122535			-0.230087	-2.30903		AYTL2 PFAAP3	Lysophosphatidylcholine acyltransferase 1 OS=Homo sapiens OX=9606 GN=LPCAT1 PE=1 SV=2	0	33.912	17	8	152	8	534	59.1	6.02	56.61	8	0	0.974007	0.696212	0.966773	1.14494	1.02989	1.15242	0.9012	0.833258	0.811796
Q8NBS9	TXNDC5	0.453774	1.64525	0.0226336	0.0518661			-1.13995	-3.60616	+	TLP46	Thioredoxin domain-containing protein 5 OS=Homo sapiens OX=9606 GN=TXNDC5 PE=1 SV=2	0	33.899	25	8	91	8	432	47.6	5.97	39.72	8	0	0.164661	0.537052	-0.481085	1.12868	1.08559	1.42623	-0.285339	-0.634271	-0.185512
Q99733	NAP1L4	0.748055	1.00575	0.0986841	0.141103			-0.418784	-2.14364		NAP2	Nucleosome assembly protein 1-like 4 OS=Homo sapiens OX=9606 GN=NAP1L4 PE=1 SV=1	0	33.854	21	7	156	5	375	42.8	4.69	74.53	7	1	0.689177	0.586159	0.73524	1.3885	0.735781	1.14264	-0.234501	-0.0361258	-0.173292
Q9Y6N5	SQOR	0.866241	0.28217	0.522192	0.649414			-0.207159	-0.700548		SQRDL	Sulfide:quinone oxidoreductase, mitochondrial OS=Homo sapiens OX=9606 GN=SQOR PE=1 SV=1	0	33.841	21	8	123	8	450	49.9	9.11	45	8	0	5.88538	5.54787	6.22489	5.66999	6.18902	6.42061	6.30317	5.65849	6.37004
Q16204	CCDC6	0.630001	1.83654	0.0145702	0.0402254	+	C33A_C93	-0.666575	-4.12355	+	D10S170 TST1	Coiled-coil domain-containing protein 6 OS=Homo sapiens OX=9606 GN=CCDC6 PE=1 SV=2	0	33.835	22	8	85	8	474	53.3	7.34	38.66	8	0	-0.248746	-0.210466	0.189265	0.427015	0.703935	0.598826	0.628291	0.950503	0.625066
Q01085	TIAL1	1.68252	1.15857	0.0694106	0.107714			0.750622	2.46376			Nucleolysin TIAR OS=Homo sapiens OX=9606 GN=TIAL1 PE=1 SV=1	0	33.828	22	6	171	4	375	41.6	7.74	83.21	6	2	1.13452	1.32237	1.76213	0.192337	0.770537	1.00428	1.82843	2.23043	1.7759
P30041	PRDX6	0.808057	0.956662	0.110494	0.151907			-0.307472	-2.04358		AOP2 KIAA0106	Peroxiredoxin-6 OS=Homo sapiens OX=9606 GN=PRDX6 PE=1 SV=3	0	33.796	37	8	160	8	224	25	6.38	70.33	8	0	1.64326	1.82229	1.80368	1.78645	2.22488	2.18032	1.69143	1.56997	1.87028
Q8NCA5	FAM98A	1.07809	0.238153	0.577893	0.706774			0.108482	0.604885			Protein FAM98A OS=Homo sapiens OX=9606 GN=FAM98A PE=1 SV=2	0	33.772	19	7	140	7	518	55.2	8.95	62.63	7	0	1.15834	0.629038	0.885155	0.632194	0.954984	0.759914	0.982237	1.58224	0.917977
P21580	TNFAIP3	0.810483	0.815619	0.152891	0.196013			-0.303146	-1.76183		OTUD7C	Tumor necrosis factor alpha-induced protein 3 OS=Homo sapiens OX=9606 GN=TNFAIP3 PE=1 SV=1	0	33.771	15	10	94	10	790	89.6	8.22	41.91	10	0	-0.093786	0.0657797	-0.235627	0.291452	-0.0712729	0.425625	0.266617	0.290737	0.189819
Q13895	BYSL	1.93607	3.16611	0.000682173	0.016	+	C33A_C93	0.953131	9.51103	+	ENP1	Bystin OS=Homo sapiens OX=9606 GN=BYSL PE=1 SV=3	0	33.738	22	8	59	8	437	49.6	8.12	19.25	8	0	-0.569106	-0.363558	-0.308083	-1.31022	-1.30102	-1.4889	0.0933039	-0.0781515	-0.213406
P48735	IDH2	0.730973	2.45304	0.00352341	0.022875	+	C33A_C93	-0.45211	-6.16066	+		Isocitrate dehydrogenase [NADP], mitochondrial OS=Homo sapiens OX=9606 GN=IDH2 PE=1 SV=2	0	33.688	22	9	76	8	452	50.9	8.69	26.04	9	1	0.894732	0.815167	0.67722	1.21524	1.3211	1.2071	0.870301	0.360578	0.651728
O60684	KPNA6	1.39087	0.785579	0.163841	0.208799			0.475991	1.70267		IPOA7	Importin subunit alpha-7 OS=Homo sapiens OX=9606 GN=KPNA6 PE=1 SV=1	0	33.678	19	8	192	5	536	60	4.98	83.11	8	0	0.718529	0.625476	0.171172	-0.167146	0.4733	-0.218952	0.299552	-3.47154	0.377965
Q14147	DHX34	2.14728	1.30287	0.0497881	0.0834418			1.10251	2.7806	+	DDX34 KIAA0134	Probable ATP-dependent RNA helicase DHX34 OS=Homo sapiens OX=9606 GN=DHX34 PE=1 SV=2	0	33.655	14	10	81	10	1143	128	7.56	20.48	10	0	-1.80936	-1.40106	-1.1642	-2.49833	-1.99008	-3.19376	-3.37317	-2.01124	-0.917313
Q9NQX7	ITM2C	0.523374	3.28516	0.000518612	0.0166602	+	C33A_C93	-0.934087	-10.2096	+	BRI3	Integral membrane protein 2C OS=Homo sapiens OX=9606 GN=ITM2C PE=1 SV=1	0	33.637	30	7	94	7	267	30.2	8	39.33	7	0	1.67159	1.71587	1.48622	2.44224	2.60659	2.62712	1.60245	0.911574	1.66797
Q9H9B4	SFXN1	0.744897	2.41752	0.00382369	0.0230789	+	C33A_C93	-0.424887	-6.02504	+		Sideroflexin-1 OS=Homo sapiens OX=9606 GN=SFXN1 PE=1 SV=4	0	33.582	28	8	240	8	322	35.6	9.07	114.09	8	0	2.45105	2.42255	2.33705	2.94139	2.72917	2.81476	2.56849	2.31799	2.4262
Q9Y2T2	AP3M1	1.13759	1.72422	0.0188704	0.0484992	+	C33A_C93	0.185974	3.8143			AP-3 complex subunit mu-1 OS=Homo sapiens OX=9606 GN=AP3M1 PE=1 SV=1	0	33.573	32	9	124	8	418	46.9	6.93	59.58	9	0	0.573788	0.452948	0.423602	0.318632	0.308325	0.265457	0.455356	0.210175	0.161672
Q6NYC1	JMJD6	0.910074	0.253455	0.557886	0.685753			-0.135945	-0.638479		KIAA0585 PSR PTDSR	Bifunctional arginine demethylase and lysyl-hydroxylase JMJD6 OS=Homo sapiens OX=9606 GN=JMJD6 PE=1 SV=1	0	33.417	27	7	111	7	403	46.4	8.69	36.92	7	0	0.614855	0.289621	0.831953	0.848137	0.42862	0.867506	-0.193836	-1.25047	-0.66469
Q9H078	CLPB	1.11654	0.22612	0.594128	0.721933			0.159037	0.578187		SKD3	Mitochondrial disaggregase OS=Homo sapiens OX=9606 GN=CLPB PE=1 SV=1	0	33.413	19	8	100	8	707	78.7	9.01	32.22	8	0	1.9235	1.79416	1.13162	1.70103	1.29095	1.38019	0.847313	-0.993168	0.884395
O15460	P4HA2	0.418255	1.93973	0.0114888	0.0362306	+	C33A_C93	-1.25755	-4.42248	+		Prolyl 4-hydroxylase subunit alpha-2 OS=Homo sapiens OX=9606 GN=P4HA2 PE=1 SV=1	0	33.321	20	7	65	7	535	60.9	5.71	21.84	7	0	-0.919574	-1.40891	-0.765407	-0.0182715	0.639783	0.0572327	-0.521713	-0.115509	-0.494333
O15143	ARPC1B	0.79969	0.880397	0.131705	0.173069			-0.322487	-1.8903		ARC41	Actin-related protein 2/3 complex subunit 1B OS=Homo sapiens OX=9606 GN=ARPC1B PE=1 SV=3	0	33.315	30	7	85	7	372	40.9	8.35	28.74	7	0	0.487589	1.04548	0.80948	0.998001	1.1322	1.17981	0.335542	0.294581	0.558622
P08240	SRPRA	9.56115	3.73914	0.000182329	0.0108772	+	C33A_C93	3.25718	13.3445	+	SRPR	Signal recognition particle receptor subunit alpha OS=Homo sapiens OX=9606 GN=SRPRA PE=1 SV=2	0	33.312	16	9	92	9	638	69.8	8.95	38.21	9	0	0.916237	1.27193	0.878242	-2.40211	-2.48414	-1.81889	0.915136	0.383092	0.689729
Q7L2H7	EIF3M	0.680451	1.39045	0.0406956	0.0727938			-0.555437	-2.98108		HFLB5 PCID1	Eukaryotic translation initiation factor 3 subunit M OS=Homo sapiens OX=9606 GN=EIF3M PE=1 SV=1	0	33.291	22	8	105	8	374	42.5	5.63	43.06	8	0	1.66671	1.22288	1.69141	1.92918	2.28949	2.02864	0.0670494	-0.31486	0.127254
P84098	RPL19	1.33708	2.26738	0.00540276	0.0259314	+	C33A_C93	0.419089	5.47883	+		Large ribosomal subunit protein eL19 OS=Homo sapiens OX=9606 GN=RPL19 PE=1 SV=1	0	33.287	28	6	185	6	196	23.5	11.47	86.2	6	0	2.92747	2.74207	2.70929	2.36414	2.31838	2.43906	2.98169	2.08223	2.68053
Q9ULX6	AKAP8L	0.924518	0.522782	0.300067	0.373372			-0.113226	-1.18938		NAKAP NAKAP95	A-kinase anchor protein 8-like OS=Homo sapiens OX=9606 GN=AKAP8L PE=1 SV=4	0	33.261	13	7	139	7	646	71.6	5.05	65.93	7	0	3.13862	3.13228	3.28529	3.43635	3.15582	3.3037	3.34159	3.49469	3.17716
Q00325	SLC25A3	1.05272	0.18969	0.646115	0.772947			0.074126	0.495684		PHC	Solute carrier family 25 member 3 OS=Homo sapiens OX=9606 GN=SLC25A3 PE=1 SV=2	0	33.238	20	9	194	9	362	40.1	9.38	79.34	9	0	3.68519	3.69437	3.82023	3.37379	3.82001	3.7836	3.85735	3.8483	3.9836
Q15046	KARS1	1.39328	2.37181	0.00424803	0.0226585	+	C33A_C93	0.478484	5.85422	+	KARS KIAA0070	Lysine--tRNA ligase OS=Homo sapiens OX=9606 GN=KARS1 PE=1 SV=3	0	33.236	17	10	147	10	597	68	6.35	60.79	10	0	0.415379	0.593647	0.628405	0.146327	-0.0201199	0.0757709	1.01115	-0.0321278	0.563404
Q9H0S4	DDX47	2.05834	2.53541	0.00291464	0.0230888	+	C33A_C93	1.04148	6.48514	+		Probable ATP-dependent RNA helicase DDX47 OS=Homo sapiens OX=9606 GN=DDX47 PE=1 SV=1	0	33.222	20	8	151	8	455	50.6	9.1	70.31	8	0	2.55115	2.37089	2.51389	1.44769	1.69311	1.17068	2.45085	2.16851	2.2516
Q04917	YWHAH	0.832172	1.29947	0.0501801	0.083664			-0.265046	-2.77293		YWHA1	14-3-3 protein eta OS=Homo sapiens OX=9606 GN=YWHAH PE=1 SV=4	0	33.181	48	8	100	6	246	28.2	4.84	53.14	8	0	0.150419	0.179676	-0.0909468	0.40478	0.366219	0.263289	0.311836	-0.190496	-0.130806
P84103	SRSF3	0.946229	0.322379	0.476015	0.593432			-0.0797389	-0.78562		SFRS3 SRP20	Serine/arginine-rich splicing factor 3 OS=Homo sapiens OX=9606 GN=SRSF3 PE=1 SV=1	0	33.18	43	6	392	6	164	19.3	11.65	202.63	6	0	4.56868	4.44355	4.69361	4.74692	4.50971	4.68844	4.57927	4.43856	4.31386
Q9H5Z1	DHX35	1.3567	1.06494	0.0861112	0.126717			0.440097	2.26596		C20orf15 DDX35	Probable ATP-dependent RNA helicase DHX35 OS=Homo sapiens OX=9606 GN=DHX35 PE=1 SV=2	0	33.177	17	9	68	9	703	78.9	8.59	20.47	9	0	-0.81584	-1.16826	-1.23939	-1.23068	-1.62092	-1.69218	-2.15059	-1.03815	-2.68346
P31947	SFN	1.70385	0.84168	0.143986	0.185821			0.768794	1.81335		HME1	14-3-3 protein sigma OS=Homo sapiens OX=9606 GN=SFN PE=1 SV=1	0	33.166	41	8	98	7	248	27.8	4.74	42.53	8	0	-0.170591	-0.01584	-0.207164	-1.06575	-1.53008	-0.104152	-2.02289	-1.09524	-0.529181
P04150	NR3C1	1.68787	0.533476	0.292768	0.362668			0.755204	1.21036		GRL	Glucocorticoid receptor OS=Homo sapiens OX=9606 GN=NR3C1 PE=1 SV=1	0	33.157	14	8	92	8	777	85.6	6.38	28.88	8	0	-0.480926	-0.480342	-0.920061	-0.816371	-0.736119	-2.59445	-0.627297	-0.795502	-0.605827
O00116	AGPS	1.26111	1.30062	0.0500468	0.0835155			0.334694	2.77553			Alkyldihydroxyacetonephosphate synthase, peroxisomal OS=Homo sapiens OX=9606 GN=AGPS PE=1 SV=1	0	33.107	20	9	94	9	658	72.9	7.34	32.03	9	0	-1.01421	-0.708424	-0.742429	-1.23852	-1.01296	-1.21766	-1.01982	-0.966686	-0.826195
P26196	DDX6	1.38333	0.832947	0.146911	0.188683			0.468143	1.79606		HLR2 RCK	Probable ATP-dependent RNA helicase DDX6 OS=Homo sapiens OX=9606 GN=DDX6 PE=1 SV=2	0	33.105	23	9	143	9	483	54.4	8.66	59	9	0	0.814568	0.939659	0.785068	0.779316	-0.0987425	0.454292	0.338243	-0.107478	0.476556
Q9BQ67	GRWD1	1.11896	0.569181	0.269662	0.336286			0.162161	1.28024		GRWD KIAA1942 WDR28	Glutamate-rich WD repeat-containing protein 1 OS=Homo sapiens OX=9606 GN=GRWD1 PE=1 SV=1	0	33.095	20	7	144	7	446	49.4	4.92	56.85	7	0	1.26973	0.883102	0.954144	0.79601	0.947948	0.876534	1.07395	1.03344	1.07948
P48047	ATP5PO	1.23913	0.981165	0.104432	0.145892			0.309322	2.09337		ATP5O ATPO	ATP synthase subunit O, mitochondrial OS=Homo sapiens OX=9606 GN=ATP5PO PE=1 SV=1	0	33.09	45	7	190	7	213	23.3	9.96	86.28	7	0	2.40818	2.78259	2.4373	2.10204	2.20316	2.3949	3.66012	2.29811	2.3932
P14866	HNRNPL	1.00492	0.0314153	0.930218	0.971265			0.00708644	0.0932113		HNRPL	Heterogeneous nuclear ribonucleoprotein L OS=Homo sapiens OX=9606 GN=HNRNPL PE=1 SV=2	0	33.068	15	7	173	7	589	64.1	8.22	76.27	7	0	2.9573	2.87689	3.06217	3.01256	2.85061	3.01193	3.11875	3.02645	2.97642
Q96D71	REPS1	1.10625	0.244802	0.569113	0.697284			0.145676	0.619529			RalBP1-associated Eps domain-containing protein 1 OS=Homo sapiens OX=9606 GN=REPS1 PE=1 SV=3	0	33.016	17	8	48	8	796	86.6	5.69	15.66	8	0	-0.53907	-0.801182	-0.819003	-1.27582	-0.537796	-0.782665	-0.958747	-1.35964	-0.870663
Q8IWF2	FOXRED2	1.0941	0.126316	0.747626	0.853077			0.129749	0.344779		ERFAD	FAD-dependent oxidoreductase domain-containing protein 2 OS=Homo sapiens OX=9606 GN=FOXRED2 PE=1 SV=1	0	33.013	13	7	99	7	684	77.7	7.72	30.96	7	0	-0.00263201	0.384935	0.7976	0.106656	-0.154242	0.838241	0.565915	0.196798	0.277152
P24928	POLR2A	1.65564	0.769852	0.169882	0.217188			0.727386	1.6718		POLR2	DNA-directed RNA polymerase II subunit RPB1 OS=Homo sapiens OX=9606 GN=POLR2A PE=1 SV=2	0	32.987	6	10	100	10	1970	217	7.37	35.92	10	0	-1.11953	-0.720454	-1.11402	-1.07713	-1.56778	-2.49126	-0.195108	-0.298674	-0.176073
Q8N5A5	ZGPAT	1.20827	0.800422	0.158335	0.20204			0.27294	1.73187		GPATC6 GPATCH6 KIAA1847 ZC3H9 ZC3HDC9 ZIP	Zinc finger CCCH-type with G patch domain-containing protein OS=Homo sapiens OX=9606 GN=ZGPAT PE=1 SV=3	0	32.961	17	8	110	8	531	57.3	5.43	38.26	8	0	0.417271	0.296383	0.609922	-0.0561313	0.172069	0.388817	1.13496	0.686488	0.599584
Q96B67	ARRDC3	0.672341	0.67272	0.212461	0.267277			-0.572735	-1.48204		KIAA1376	Arrestin domain-containing protein 3 OS=Homo sapiens OX=9606 GN=ARRDC3 PE=1 SV=1	0	32.943	34	8	80	8	414	46.4	6.6	23.81	8	0	0.299545	-0.86622	-0.189169	0.072432	0.201936	0.687994	1.23565	-0.844165	1.10356
Q52LJ0	FAM98B	0.383242	3.71522	0.000192655	0.0101639	+	C33A_C93	-1.38367	-13.1586	+		Protein FAM98B OS=Homo sapiens OX=9606 GN=FAM98B PE=1 SV=2	0	32.929	24	7	144	7	433	45.5	8.69	73.98	7	0	1.15048	1.23332	1.48278	2.6317	2.7377	2.64819	1.53967	1.70919	1.61329
Q8WVV9	HNRNPLL	0.705577	0.404491	0.394011	0.499272			-0.503125	-0.954212		HNRPLL SRRF	Heterogeneous nuclear ribonucleoprotein L-like OS=Homo sapiens OX=9606 GN=HNRNPLL PE=1 SV=1	0	32.904	18	7	75	7	542	60	7.72	16.1	7	0	-0.841025	-1.97516	-1.91841	-0.423334	-1.0737	-1.72819	-0.679764	-2.20265	-0.775929
Q92696	RABGGTA	0.85845	0.148956	0.70965	0.82053			-0.220194	-0.399922			Geranylgeranyl transferase type-2 subunit alpha OS=Homo sapiens OX=9606 GN=RABGGTA PE=1 SV=2	0	32.885	23	10	106	10	567	65	5.67	28.82	10	0	-2.82404	-1.49463	-1.46021	-1.63764	-1.19152	-2.28913	-1.37004	-1.89956	-2.12793
Q9Y617	PSAT1	1.00663	0.00849945	0.98062	0.991214			0.00953877	0.0258442		PSA	Phosphoserine aminotransferase OS=Homo sapiens OX=9606 GN=PSAT1 PE=1 SV=2	0	32.852	25	9	136	9	370	40.4	7.66	62.94	9	0	0.256828	1.29127	0.717836	0.317079	0.912483	1.00776	0.513194	0.518301	0.0803818
Q9BY44	EIF2A	1.85604	2.50342	0.00313749	0.0224945	+	C33A_C93	0.892226	6.35743	+		Eukaryotic translation initiation factor 2A OS=Homo sapiens OX=9606 GN=EIF2A PE=1 SV=3	0	32.805	19	8	120	8	585	64.9	8.87	47.43	8	0	1.32506	1.46419	1.30612	0.701446	0.470265	0.246982	0.183184	-0.0853629	0.582161
Q9Y305	ACOT9	0.926565	0.0721768	0.846883	0.925863			-0.110036	-0.205957			Acyl-coenzyme A thioesterase 9, mitochondrial OS=Homo sapiens OX=9606 GN=ACOT9 PE=1 SV=2	0	32.798	19	9	72	9	439	49.9	8.6	34.38	9	0	0.873953	0.902794	0.0156532	0.225432	0.294362	1.60271	0.856934	0.177092	0.119597
Q6ZS17	RIPOR1	1.08109	0.331051	0.466605	0.583582			0.112492	0.80372		FAM65A KIAA1930	Rho family-interacting cell polarization regulator 1 OS=Homo sapiens OX=9606 GN=RIPOR1 PE=1 SV=1	0	32.679	9	10	99	10	1223	132.2	6.28	25.07	10	0	-0.581259	-0.84863	-0.932292	-1.0532	-0.736499	-0.909953	-0.663988	-0.475583	-0.868235
P63173	RPL38	2.49381	3.1008	0.000792872	0.0155906	+	C33A_C93	1.31835	9.14699	+		Large ribosomal subunit protein eL38 OS=Homo sapiens OX=9606 GN=RPL38 PE=1 SV=2	0	32.666	53	6	190	6	70	8.2	10.1	75.21	6	0	3.02729	3.16687	2.92283	1.84858	1.46945	1.84389	3.45223	2.43671	2.65796
P07947	YES1	0.754643	0.512289	0.307405	0.38244			-0.406133	-1.16875		YES	Tyrosine-protein kinase Yes OS=Homo sapiens OX=9606 GN=YES1 PE=1 SV=3	0	32.608	14	8	135	6	543	60.8	6.74	70.82	8	2	1.78785	2.0806	1.08163	1.7721	2.00323	2.39314	1.50484	1.0821	1.74022
Q8WUF5	PPP1R13L	0.575914	1.20918	0.0617763	0.100825			-0.796074	-2.5731		IASPP NKIP1 PPP1R13BL RAI	RelA-associated inhibitor OS=Homo sapiens OX=9606 GN=PPP1R13L PE=1 SV=4	0	32.599	16	9	75	9	828	89	6.81	20.07	9	0	-2.99068	-2.07516	-2.13248	-1.42789	-1.72375	-1.65845	-3.10301	-2.33553	-1.94813
Q96A19	CCDC102A	0.712185	2.32868	0.00469159	0.0253769	+	C33A_C93	-0.489676	-5.6967	+		Coiled-coil domain-containing protein 102A OS=Homo sapiens OX=9606 GN=CCDC102A PE=1 SV=2	0	32.531	19	8	96	8	550	62.6	5.58	35.42	8	0	-0.6693	-0.401367	-0.593368	-0.0138324	-0.0569314	-0.124242	-0.344866	-1.28195	-0.630003
O75122	CLASP2	3.30112	1.89649	0.0126913	0.0362331	+	C33A_C93	1.72295	4.29544	+	KIAA0627	CLIP-associating protein 2 OS=Homo sapiens OX=9606 GN=CLASP2 PE=1 SV=3	0	32.52	10	11	66	11	1294	141	8.4	20.34	11	0	-0.98361	-0.666372	-0.834838	-1.79361	-2.76573	-3.09434	-1.81406	-1.29078	-0.723768
O00425	IGF2BP3	0.548008	1.2761	0.0529546	0.0865497			-0.867731	-2.72059	+	IMP3 KOC1 VICKZ3	Insulin-like growth factor 2 mRNA-binding protein 3 OS=Homo sapiens OX=9606 GN=IGF2BP3 PE=1 SV=2	0	32.5	14	8	124	7	579	63.7	8.87	49.61	8	1	0.508755	0.125682	0.434977	1.76377	1.1678	0.741038	0.0909195	-0.0401075	0.385473
Q99985	SEMA3C	0.752859	1.30221	0.0498648	0.0835627			-0.409548	-2.77909		SEMAE	Semaphorin-3C OS=Homo sapiens OX=9606 GN=SEMA3C PE=2 SV=2	0	32.477	14	9	78	9	751	85.2	8.69	24.05	9	0	0.337105	0.203322	-0.109811	0.609756	0.424109	0.625393	0.29731	-0.440436	0.047036
P78316	NOP14	1.21054	1.05787	0.087524	0.128194			0.27565	2.25125		C4orf9 NOL14	Nucleolar protein 14 OS=Homo sapiens OX=9606 GN=NOP14 PE=1 SV=3	0	32.448	13	9	86	9	857	97.6	7.58	30.68	9	0	0.786123	0.605814	0.434375	0.3052	0.463073	0.231089	0.0921592	0.164808	0.214001
Q9H6R7	WDCP	1.49704	0.769972	0.169835	0.217321			0.58211	1.67203		C2orf44	WD repeat and coiled-coil-containing protein OS=Homo sapiens OX=9606 GN=WDCP PE=1 SV=1	0	32.383	14	7	129	7	721	79.1	6.7	46.19	7	0	1.01933	0.764904	1.19359	0.0487013	1.05933	0.12346	1.64704	1.99845	1.12189
P33527	ABCC1	0.571083	2.00033	0.00999243	0.0347373	+	C33A_C93	-0.808228	-4.6051	+	MRP MRP1	Multidrug resistance-associated protein 1 OS=Homo sapiens OX=9606 GN=ABCC1 PE=1 SV=3	0	32.371	9	10	36	10	1531	171.5	7.11	12.98	10	0	-2.08018	-2.32069	-2.61297	-1.36753	-1.57222	-1.64941	-2.47287	-2.72277	-2.37883
Q9Y3Z3	SAMHD1	0.639274	0.874776	0.133421	0.176306			-0.645493	-1.87909		MOP5	Deoxynucleoside triphosphate triphosphohydrolase SAMHD1 OS=Homo sapiens OX=9606 GN=SAMHD1 PE=1 SV=2	0	32.367	16	9	140	9	626	72.2	7.14	57.85	9	0	0.0410042	-0.378222	0.0162604	-0.0840404	0.939221	0.760341	0.506554	0.340535	0.24723
P29590	PML	0.556617	2.05457	0.00881919	0.031973	+	C33A_C93	-0.845242	-4.77323	+	MYL PP8675 RNF71 TRIM19	Protein PML OS=Homo sapiens OX=9606 GN=PML PE=1 SV=3	0	32.326	13	9	95	9	882	97.5	6.21	31.99	9	0	-0.181683	0.209457	-0.177867	1.00065	0.801638	0.583343	-0.115698	-0.522409	-1.15951
Q9Y6C9	MTCH2	0.714804	0.908283	0.123514	0.163024			-0.484381	-1.94606		MIMP	Mitochondrial carrier homolog 2 OS=Homo sapiens OX=9606 GN=MTCH2 PE=1 SV=1	0	32.304	27	6	98	6	303	33.3	7.97	38.48	6	0	1.07318	1.14226	0.572744	1.53471	1.07349	1.63312	0.597844	0.356183	0.45297
Q9H6F5	CCDC86	1.0927	0.327942	0.469957	0.587319			0.127903	0.797241		CYCLON	Coiled-coil domain-containing protein 86 OS=Homo sapiens OX=9606 GN=CCDC86 PE=1 SV=1	0	32.29	21	6	128	6	360	40.2	10.33	54.41	6	0	1.67688	1.73151	1.73378	1.87425	1.3241	1.56011	1.87885	1.70013	1.93626
Q9UBU9	NXF1	1.27632	0.613893	0.24328	0.300335			0.351991	1.36746		TAP	Nuclear RNA export factor 1 OS=Homo sapiens OX=9606 GN=NXF1 PE=1 SV=1	0	32.22	23	9	93	9	619	70.1	8.51	26.83	9	0	-0.0774195	0.105458	-0.0700057	-0.114765	-0.116453	-0.866723	-1.58404	-1.81348	-1.30168
Q5T3I0	GPATCH4	2.03577	2.00056	0.00998706	0.034811	+	C33A_C93	1.02558	4.60581	+	GPATC4	G patch domain-containing protein 4 OS=Homo sapiens OX=9606 GN=GPATCH4 PE=1 SV=2	0	32.181	25	8	69	8	446	50.4	9.63	22.28	8	0	0.238993	0.101251	-0.0879927	-0.555019	-1.03588	-1.23359	-0.225357	-0.26101	-0.175848
Q9NRF8	CTPS2	0.577287	1.51378	0.030635	0.0662667			-0.79264	-3.27533	+		CTP synthase 2 OS=Homo sapiens OX=9606 GN=CTPS2 PE=1 SV=1	0	32.159	18	9	103	7	586	65.6	6.9	40.27	9	0	-1.01353	-1.63629	-0.867184	-0.467242	-0.279774	-0.392074	-1.23407	-0.997486	-0.859476
P55209	NAP1L1	0.678753	2.00644	0.0098527	0.0343126	+	C33A_C93	-0.559041	-4.62383	+	NRP	Nucleosome assembly protein 1-like 1 OS=Homo sapiens OX=9606 GN=NAP1L1 PE=1 SV=1	0	32.154	22	7	115	5	391	45.3	4.46	53.54	7	0	0.699968	1.02101	0.831481	1.31428	1.56232	1.35298	0.74472	0.471325	1.24408
P61513	RPL37A	1.17349	1.02265	0.0949177	0.135341			0.230801	2.17837			Large ribosomal subunit protein eL43 OS=Homo sapiens OX=9606 GN=RPL37A PE=1 SV=2	0	32.148	66	7	390	7	92	10.3	10.43	213.36	7	0	5.46088	5.34562	5.22002	5.21696	4.95464	5.16252	5.4616	4.74105	5.25915
Q8IWT6	LRRC8A	0.933659	0.1731	0.671274	0.792291			-0.0990321	-0.457174		KIAA1437 LRRC8 SWELL1	Volume-regulated anion channel subunit LRRC8A OS=Homo sapiens OX=9606 GN=LRRC8A PE=1 SV=1	0	32.144	14	9	152	9	810	94.1	7.94	47.04	9	0	0.760017	0.41186	0.152698	0.725594	0.597111	0.298967	-0.658119	-1.16081	-0.388491
P29323	EPHB2	0.561863	1.85796	0.0138689	0.0387074	+	C33A_C93	-0.83171	-4.18441	+	DRT EPHT3 EPTH3 ERK HEK5 TYRO5	Ephrin type-B receptor 2 OS=Homo sapiens OX=9606 GN=EPHB2 PE=1 SV=5	0	32.126	11	9	128	8	1055	117.4	6.55	65.06	9	0	-0.159089	-0.542941	-0.838239	0.322257	0.366749	0.265855	-0.40655	-1.24545	-0.894371
P34897	SHMT2	1.12994	0.340736	0.456314	0.57303			0.176248	0.823845			Serine hydroxymethyltransferase, mitochondrial OS=Homo sapiens OX=9606 GN=SHMT2 PE=1 SV=3	0	32.118	26	10	155	10	504	56	8.53	64.46	10	0	0.8192	1.50335	0.998406	0.810395	1.0151	0.966713	0.925108	0.867136	1.07314
Q8NCD3	HJURP	1.37886	1.74639	0.0179313	0.0462885	+	C33A_C93	0.463473	3.87407	+	FAKTS FLEG1 URLC9	Holliday junction recognition protein OS=Homo sapiens OX=9606 GN=HJURP PE=1 SV=2	0	32.104	17	9	65	9	748	83.5	9.31	20.4	9	0	-0.330717	-0.0845345	-0.338637	-0.857569	-0.725655	-0.561085	-0.827176	-0.354895	-0.420403
Q9UL25	RAB21	0.814677	1.88931	0.012903	0.0367896	+	C33A_C93	-0.2957	-4.27459		KIAA0118	Ras-related protein Rab-21 OS=Homo sapiens OX=9606 GN=RAB21 PE=1 SV=3	0	32.096	25	6	162	6	225	24.3	7.94	68.42	6	0	-0.093419	0.0314913	0.0798285	0.285131	0.388412	0.231458	0.0164831	-0.18854	0.204374
Q9HC36	MRM3	1.52199	0.562334	0.273946	0.340686			0.605958	1.26686		RNMTL1	rRNA methyltransferase 3, mitochondrial OS=Homo sapiens OX=9606 GN=MRM3 PE=1 SV=2	0	32.094	17	7	139	7	420	47	8.73	55.24	7	0	1.33691	0.485033	1.53149	1.22033	0.146151	0.169078	0.749588	1.87239	1.72915
P43686	PSMC4	1.03069	0.0662817	0.858457	0.932056			0.0436162	0.190143		MIP224 TBP7	26S proteasome regulatory subunit 6B OS=Homo sapiens OX=9606 GN=PSMC4 PE=1 SV=2	0	32.078	22	7	135	7	418	47.3	5.21	45.39	7	0	0.259626	0.898292	0.765399	0.737261	0.699772	0.355436	0.685288	0.90356	0.923237
Q9UMR2	DDX19B	1.06864	0.240915	0.574228	0.702337			0.0957812	0.610979		DBP5 DDX19 TDBP	ATP-dependent RNA helicase DDX19B OS=Homo sapiens OX=9606 GN=DDX19B PE=1 SV=1	0	32.061	18	8	160	8	479	53.9	6.3	57.9	8	0	1.68306	1.78932	1.70845	1.32652	1.75117	1.8158	1.81603	1.83036	1.92463
Q15084	PDIA6	2.02596	0.74735	0.178916	0.227807			1.0186	1.62771		ERP5 P5 TXNDC7	Protein disulfide-isomerase A6 OS=Homo sapiens OX=9606 GN=PDIA6 PE=1 SV=1	0	32.06	19	6	102	6	440	48.1	5.08	40.57	6	0	-0.802132	0.68046	1.01683	-1.07611	-0.163854	-0.920685	0.214007	1.36598	1.5104
Q15036	SNX17	0.687735	1.22269	0.0598837	0.0990728			-0.540076	-2.60261		KIAA0064	Sorting nexin-17 OS=Homo sapiens OX=9606 GN=SNX17 PE=1 SV=1	0	32.028	23	9	126	9	470	52.9	7.46	44.53	9	0	-0.909142	-1.25382	-1.35757	-0.946369	-0.451861	-0.502074	-1.03573	-1.92154	-1.24276
Q02880	TOP2B	1.233	0.408323	0.39055	0.495094			0.30217	0.961947			DNA topoisomerase 2-beta OS=Homo sapiens OX=9606 GN=TOP2B PE=1 SV=3	0	32.018	8	9	68	9	1626	183.2	8	16.87	9	0	-0.575405	-1.16049	-0.867825	-1.40482	-0.641473	-1.46393	-1.73911	-1.69393	-1.42694
Q01546	KRT76	5.49291	1.97376	0.0106228	0.035177	+	C33A_C93	2.45757	4.52437	+	KRT2B KRT2P	Keratin, type II cytoskeletal 2 oral OS=Homo sapiens OX=9606 GN=KRT76 PE=1 SV=2	0	32.013	9	8	170	2	638	65.8	8.12	89.89	8	0	3.24453	2.22183	3.96209	0.338641	1.03222	0.684882	2.80352	4.06708	3.33507
O14983	ATP2A1	0.638628	2.70629	0.00196655	0.0193458	+	C33A_C93	-0.646952	-7.20543	+		Sarcoplasmic/endoplasmic reticulum calcium ATPase 1 OS=Homo sapiens OX=9606 GN=ATP2A1 PE=1 SV=1	0	31.978	13	9	143	9	1001	110.2	5.16	67.42	9	0	1.8425	1.69372	1.68405	2.30265	2.5339	2.32458	1.65357	1.61837	1.9374
Q8N201	INTS1	0.82424	0.914795	0.121676	0.161648			-0.278864	-1.95913		KIAA1440	Integrator complex subunit 1 OS=Homo sapiens OX=9606 GN=INTS1 PE=1 SV=2	0	31.956	6	10	51	10	2190	244.1	6.13	11.37	10	0	-0.67946	-0.219575	-0.381047	-0.126738	-0.235917	-0.0808351	-0.298589	-0.748256	-0.373642
Q9P0V3	SH3BP4	0.851192	0.165983	0.682366	0.799082			-0.232444	-0.440451		BOG25 EHB10 TTP	SH3 domain-binding protein 4 OS=Homo sapiens OX=9606 GN=SH3BP4 PE=1 SV=1	0	31.923	12	9	67	9	963	107.4	7.71	21.68	9	0	-0.693528	-0.928307	-0.29518	0.423196	-1.28696	-0.355916	-0.447374	-0.429719	0.0587993
O15013	ARHGEF10	1.0534	0.0913311	0.810343	0.902315			0.0750512	0.256325		KIAA0294	Rho guanine nucleotide exchange factor 10 OS=Homo sapiens OX=9606 GN=ARHGEF10 PE=1 SV=4	0	31.919	11	10	47	10	1369	151.5	5.68	9.61	10	0	-1.46287	-0.679431	-1.35705	-1.56045	-1.06782	-1.09623	-1.36935	-0.199179	-1.0655
O75569	PRKRA	1.24367	1.14629	0.0714012	0.109729			0.314605	2.43749		PACT RAX	Interferon-inducible double-stranded RNA-dependent protein kinase activator A OS=Homo sapiens OX=9606 GN=PRKRA PE=1 SV=1	0	31.895	30	7	95	7	313	34.4	8.41	31.75	7	0	1.69429	1.43972	1.62121	1.21599	1.47255	1.12287	1.50727	1.20401	1.14423
O94804	STK10	0.374071	1.63891	0.0229664	0.0522023			-1.41862	-3.58978	+	LOK	Serine/threonine-protein kinase 10 OS=Homo sapiens OX=9606 GN=STK10 PE=1 SV=1	0	31.884	12	9	72	8	968	112.1	6.95	22.42	9	0	-1.00569	-1.04191	-2.20438	-0.0577382	-0.000396151	0.0619959	-2.03257	-2.20615	-2.03041
O14734	ACOT8	0.832902	0.758884	0.174227	0.222924			-0.263782	-1.6503		ACTEIII PTE1	Acyl-coenzyme A thioesterase 8 OS=Homo sapiens OX=9606 GN=ACOT8 PE=1 SV=1	0	31.873	31	6	72	6	319	35.9	7.56	22.07	6	0	0.473736	0.377183	0.586399	0.987961	0.764002	0.4767	0.78359	0.976271	1.09173
Q15436	SEC23A	1.0296	0.10475	0.785688	0.883035			0.0420823	0.290759			Protein transport protein Sec23A OS=Homo sapiens OX=9606 GN=SEC23A PE=1 SV=2	0	31.857	13	7	124	5	765	86.1	7.08	34.71	7	2	0.757334	0.646205	1.08883	0.769368	0.700731	0.896027	0.851038	0.502729	0.422183
Q9NSV4	DIAPH3	1.561	1.80945	0.0155079	0.0417877	+	C33A_C93	0.642471	4.04749	+	DIAP3	Protein diaphanous homolog 3 OS=Homo sapiens OX=9606 GN=DIAPH3 PE=1 SV=4	0	31.825	9	9	87	9	1193	136.8	7.03	38.73	9	0	0.477278	0.272245	0.5004	-0.257826	0.0331697	-0.452833	0.762689	1.35258	1.09026
P13807	GYS1	0.770857	0.481145	0.330259	0.413016			-0.375464	-1.10732		GYS	Glycogen [starch] synthase, muscle OS=Homo sapiens OX=9606 GN=GYS1 PE=1 SV=2	0	31.792	12	6	133	6	737	83.7	6.18	38.05	6	0	-0.424308	-0.195652	-0.186826	0.693029	0.0755986	-0.449022	-0.217096	0.120374	0.173993
P17655	CAPN2	0.908452	1.3793	0.0417542	0.0744699			-0.138518	-2.95517		CANPL2	Calpain-2 catalytic subunit OS=Homo sapiens OX=9606 GN=CAPN2 PE=1 SV=6	0	31.783	17	8	164	8	700	79.9	4.98	79.75	8	0	1.35763	1.50534	1.43305	1.53557	1.60284	1.57317	1.37412	1.25537	1.23435
P07948	LYN	0.750833	1.76415	0.0172126	0.0448656	+	C33A_C93	-0.413436	-3.92242		JTK8	Tyrosine-protein kinase Lyn OS=Homo sapiens OX=9606 GN=LYN PE=1 SV=3	0	31.712	20	8	81	6	512	58.5	7.11	34.39	8	0	0.0230522	0.237076	-0.0542653	0.436017	0.410407	0.599748	0.349393	-0.508101	0.112108
Q32P28	P3H1	0.573844	0.952718	0.111502	0.151951			-0.80127	-2.03559		GROS1 LEPRE1	Prolyl 3-hydroxylase 1 OS=Homo sapiens OX=9606 GN=P3H1 PE=1 SV=2	0	31.709	13	7	117	7	736	83.3	5.14	42.65	7	0	-0.362089	0.293105	-0.959909	0.151838	0.651653	0.571424	-0.144811	-0.21708	-0.538738
P61163	ACTR1A	0.696259	1.14448	0.0717007	0.109569			-0.522305	-2.43361		CTRN1	Alpha-centractin OS=Homo sapiens OX=9606 GN=ACTR1A PE=1 SV=1	0	31.707	26	6	88	6	376	42.6	6.64	28.46	6	0	0.726099	-0.01639	0.324385	0.864474	0.87534	0.861195	0.0321899	-0.459827	-0.141943
O00743	PPP6C	0.901613	0.337312	0.459926	0.574771			-0.14942	-0.816741		PPP6	Serine/threonine-protein phosphatase 6 catalytic subunit OS=Homo sapiens OX=9606 GN=PPP6C PE=1 SV=1	0	31.699	33	8	134	8	305	35.1	5.69	57.21	8	0	2.63125	2.18651	2.24331	2.26719	2.61217	2.62996	2.39851	2.14314	2.30479
P49643	PRIM2	3.60043	1.64016	0.0229002	0.0519247			1.84817	3.59301	+	PRIM2A	DNA primase large subunit OS=Homo sapiens OX=9606 GN=PRIM2 PE=1 SV=2	0	31.692	16	8	80	8	509	58.8	7.91	27.75	8	0	-1.04333	0.20256	0.309917	-1.63071	-1.88878	-2.55586	-0.288305	0.279895	-0.258978
P27694	RPA1	0.304507	1.70497	0.0197256	0.0491384	+	C33A_C93	-1.71545	-3.76288	+	REPA1 RPA70	Replication protein A 70 kDa DNA-binding subunit OS=Homo sapiens OX=9606 GN=RPA1 PE=1 SV=2	0	31.675	17	8	82	8	616	68.1	7.21	34.33	8	0	-1.85017	-1.2349	-1.61718	0.500223	0.63072	-0.686826	0.635916	1.22178	0.275206
Q9UQ80	PA2G4	2.78982	1.96774	0.0107711	0.0352994	+	C33A_C93	1.48017	4.50623	+	EBP1	Proliferation-associated protein 2G4 OS=Homo sapiens OX=9606 GN=PA2G4 PE=1 SV=3	0	31.657	23	8	115	8	394	43.8	6.55	53.36	8	0	1.74376	2.50682	1.93474	0.155751	0.621304	0.967749	1.66589	0.521466	1.78141
P57088	TMEM33	0.9618	0.237576	0.578661	0.706972			-0.0561906	-0.603611		DB83	Transmembrane protein 33 OS=Homo sapiens OX=9606 GN=TMEM33 PE=1 SV=2	0	31.655	27	8	229	8	247	28	9.7	117.01	8	0	3.4155	3.27468	3.51852	3.35554	3.56537	3.45636	3.51239	3.29753	3.50942
O14545	TRAFD1	0.858403	0.212486	0.613076	0.740956			-0.220272	-0.547619		FLN29	TRAF-type zinc finger domain-containing protein 1 OS=Homo sapiens OX=9606 GN=TRAFD1 PE=1 SV=1	0	31.631	19	8	108	8	582	64.8	5.29	29.53	8	0	-0.0741708	-0.689668	-1.17366	-0.128755	-0.233889	-0.914039	-0.17575	0.100235	-0.212259
P35249	RFC4	1.26855	1.36582	0.04307	0.0765322			0.343175	2.92402			Replication factor C subunit 4 OS=Homo sapiens OX=9606 GN=RFC4 PE=1 SV=2	0	31.615	23	9	144	9	363	39.7	8.02	67.34	9	0	1.77463	1.76048	2.07872	1.5379	1.61768	1.42873	1.6205	1.80438	1.45816
Q15477	SKIC2	0.895987	0.189551	0.646322	0.772572			-0.15845	-0.495364		DDX13 SKI2W SKIV2 SKIV2L W	Superkiller complex protein 2 OS=Homo sapiens OX=9606 GN=SKIC2 PE=1 SV=3	0	31.6	11	9	82	9	1246	137.7	6.06	18.82	9	0	-2.36741	-1.55113	-1.53128	-1.6738	-1.36905	-1.93163	-1.46891	-1.66928	-1.40063
Q6ZRP7	QSOX2	0.767844	3.08403	0.000824083	0.015	+	C33A_C93	-0.381115	-9.05562	+	QSCN6L1 SOXN	Sulfhydryl oxidase 2 OS=Homo sapiens OX=9606 GN=QSOX2 PE=1 SV=3	0	31.533	17	9	59	9	698	77.5	7.72	16.12	9	0	-0.505728	-0.514336	-0.626949	-0.198948	-0.156253	-0.148468	-0.566638	-0.845502	-0.489386
Q9HAU5	UPF2	2.45519	0.843653	0.143333	0.18565			1.29583	1.81726		KIAA1408 RENT2	Regulator of nonsense transcripts 2 OS=Homo sapiens OX=9606 GN=UPF2 PE=1 SV=1	0	31.517	8	10	68	10	1272	147.7	5.69	23.03	10	0	-2.38606	-2.55256	-2.34901	-2.65573	-5.06969	-3.44972	-2.99864	-2.62743	-2.27134
Q9NPQ8	RIC8A	0.96011	0.190196	0.645363	0.772799			-0.0587281	-0.496848			Synembryn-A OS=Homo sapiens OX=9606 GN=RIC8A PE=1 SV=3	0	31.513	19	9	191	9	531	59.7	5.33	81.54	9	0	0.733383	0.833558	0.768748	0.609838	0.974095	0.92794	0.596988	0.756508	0.656944
O15321	TM9SF1	0.948008	0.165866	0.682549	0.799055			-0.0770281	-0.440177			Transmembrane 9 superfamily member 1 OS=Homo sapiens OX=9606 GN=TM9SF1 PE=2 SV=2	0	31.51	15	6	87	6	606	68.8	7.17	34.19	6	0	0.138746	0.138417	0.135776	0.0227597	0.564092	0.0571723	-0.132411	-0.293072	-0.987042
P16435	POR	0.690039	1.35346	0.0443134	0.078822			-0.535251	-2.89559		CYPOR	NADPH--cytochrome P450 reductase OS=Homo sapiens OX=9606 GN=POR PE=1 SV=2	0	31.496	19	10	93	10	677	76.6	5.58	38.05	10	0	-0.0999241	0.308833	-0.316617	0.476563	0.475406	0.546076	-0.421659	-0.627897	-0.467953
Q9HD45	TM9SF3	0.810764	1.52155	0.030092	0.0660078			-0.302645	-3.29436		SMBP	Transmembrane 9 superfamily member 3 OS=Homo sapiens OX=9606 GN=TM9SF3 PE=1 SV=2	0	31.481	14	7	119	7	589	67.8	7.21	49.69	7	0	0.850735	0.697896	0.734537	1.06414	0.925816	1.20114	0.764893	0.521217	0.709738
O14965	AURKA	3.93765	1.10106	0.0792387	0.11904			1.97733	2.34161	+	AIK AIRK1 ARK1 AURA AYK1 BTAK IAK1 STK15 STK6	Aurora kinase A OS=Homo sapiens OX=9606 GN=AURKA PE=1 SV=3	0	31.445	23	7	94	7	403	45.8	9.39	28.73	7	0	-0.439063	-0.681272	-0.516996	-1.59731	-1.76901	-4.20301	0.414823	-0.53729	-0.613155
Q6PJG6	BRAT1	0.835884	0.18178	0.657992	0.781287			-0.258626	-0.477401		BAAT1 C7orf27	BRCA1-associated ATM activator 1 OS=Homo sapiens OX=9606 GN=BRAT1 PE=1 SV=2	0	31.372	14	9	56	9	821	88.1	5.27	16.93	9	0	-2.62119	-2.57893	-1.5338	-2.59448	-1.20918	-2.15438	-2.69919	-2.7326	-1.53341
Q9Y285	FARSA	1.28373	2.3184	0.00480401	0.0254194	+	C33A_C93	0.360339	5.65966	+	FARS FARSL FARSLA	Phenylalanine--tRNA ligase alpha subunit OS=Homo sapiens OX=9606 GN=FARSA PE=1 SV=3	0	31.265	26	9	159	9	508	57.5	7.8	93.61	9	0	2.65861	2.52525	2.64122	2.15359	2.2805	2.30997	2.68791	2.30119	2.40257
Q99729	HNRNPAB	0.839694	1.12623	0.0747774	0.113282			-0.252065	-2.3948		ABBP1 HNRPAB	Heterogeneous nuclear ribonucleoprotein A/B OS=Homo sapiens OX=9606 GN=HNRNPAB PE=1 SV=2	0	31.261	18	7	267	6	332	36.2	8.21	143.54	7	0	2.01737	1.9858	2.09381	2.12145	2.46705	2.26468	2.02084	2.27978	2.21084
Q99653	CHP1	0.816028	1.3662	0.0430328	0.0766968			-0.293309	-2.92489		CHP	Calcineurin B homologous protein 1 OS=Homo sapiens OX=9606 GN=CHP1 PE=1 SV=3	0	31.259	36	7	79	7	195	22.4	5.1	20.31	7	0	0.579601	0.404031	0.241844	0.695295	0.745076	0.665032	0.518262	-0.220135	0.158825
P62888	RPL30	1.2821	1.81197	0.015418	0.0413952	+	C33A_C93	0.358505	4.05453			Large ribosomal subunit protein eL30 OS=Homo sapiens OX=9606 GN=RPL30 PE=1 SV=2	0	31.173	59	7	465	7	115	12.8	9.63	255.77	7	0	6.12686	5.86552	5.97144	5.69009	5.54066	5.65756	6.07774	5.35756	5.77091
P36542	ATP5F1C	1.35189	1.86478	0.0136527	0.0380472	+	C33A_C93	0.434981	4.20392	+	ATP5C ATP5C1 ATP5CL1	ATP synthase subunit gamma, mitochondrial OS=Homo sapiens OX=9606 GN=ATP5F1C PE=1 SV=1	0	31.171	23	7	298	7	298	33	9.22	148.6	7	0	3.22179	3.06714	3.15104	2.54551	2.72117	2.86836	3.24271	3.00198	3.14562
Q96DI7	SNRNP40	0.949723	0.234388	0.582924	0.710414			-0.0744211	-0.59656		PRP8BP SFP38 WDR57	U5 small nuclear ribonucleoprotein 40 kDa protein OS=Homo sapiens OX=9606 GN=SNRNP40 PE=1 SV=1	0	31.145	29	7	98	7	357	39.3	8.1	40.97	7	0	0.580605	0.693415	0.926246	0.86372	0.66467	0.895138	0.276137	0.429809	0.332005
O75815	BCAR3	1.00561	0.0170734	0.96145	0.980542			0.00807154	0.0514286		NSP2 SH2D3B	Breast cancer anti-estrogen resistance protein 3 OS=Homo sapiens OX=9606 GN=BCAR3 PE=1 SV=1	0	31.132	11	8	98	8	825	92.5	7.96	42.77	8	0	0.130169	0.395244	0.546462	0.167721	0.370795	0.509144	1.13928	1.34074	0.978719
P16152	CBR1	1.0078	0.0219117	0.950798	0.981654			0.0112048	0.0656615		CBR CRN SDR21C1	Carbonyl reductase [NADPH] 1 OS=Homo sapiens OX=9606 GN=CBR1 PE=1 SV=3	0	31.125	35	7	107	5	277	30.4	8.32	49.03	7	2	0.519459	1.00097	0.512244	0.591974	0.772462	0.634625	0.568304	0.496723	0.439631
Q12907	LMAN2	0.704221	2.46863	0.00339911	0.0233617	+	C33A_C93	-0.505901	-6.22102	+	C5orf8	Vesicular integral-membrane protein VIP36 OS=Homo sapiens OX=9606 GN=LMAN2 PE=1 SV=1	0	31.094	17	7	95	7	356	40.2	6.95	32.51	7	0	-0.465668	-0.283422	-0.496274	0.0662494	0.0246515	0.181437	-0.68134	-0.582972	-0.341572
P24844	MYL9	0.593468	2.05723	0.00876528	0.0318375	+	C33A_C93	-0.752757	-4.7816	+	MLC2 MRLC1 MYRL2	Myosin regulatory light polypeptide 9 OS=Homo sapiens OX=9606 GN=MYL9 PE=1 SV=4	0	31.048	32	5	764	5	172	19.8	4.92	421.95	5	0	7.36258	6.85754	7.02357	7.8004	7.76565	7.93591	7.57043	6.35183	7.22692
P05783	KRT18	1.67368	0.855399	0.139509	0.182037			0.743025	1.84055		CYK18	Keratin, type I cytoskeletal 18 OS=Homo sapiens OX=9606 GN=KRT18 PE=1 SV=2	0	30.959	20	9	123	7	430	48	5.45	54.71	9	1	0.432785	1.41522	0.435421	-0.259623	-0.174963	0.488939	0.651611	0.728087	0.567794
Q9Y4K0	LOXL2	0.892407	0.264598	0.543754	0.672903			-0.164227	-0.66271			Lysyl oxidase homolog 2 OS=Homo sapiens OX=9606 GN=LOXL2 PE=1 SV=1	0	30.955	14	7	39	7	774	86.7	6.38	8.18	7	0	-0.670397	-0.874218	-0.979977	-0.711723	-1.05832	-0.261871	0.118537	-0.465592	-0.740112
O14979	HNRNPDL	0.806871	1.0751	0.0841211	0.12474			-0.30959	-2.28715		HNRPDL JKTBP	Heterogeneous nuclear ribonucleoprotein D-like OS=Homo sapiens OX=9606 GN=HNRNPDL PE=1 SV=3	0	30.91	13	8	316	6	420	46.4	9.57	164.42	8	2	4.24184	4.2001	4.4137	4.53691	4.42466	4.82284	4.86135	4.91879	4.48922
P26583	HMGB2	2.27592	0.725781	0.188026	0.237681			1.18645	1.58554		HMG2	High mobility group protein B2 OS=Homo sapiens OX=9606 GN=HMGB2 PE=1 SV=2	0	30.908	37	8	89	6	209	24	7.81	32.14	8	0	-0.430335	-0.583788	-0.161065	-0.913427	-0.769228	-3.05188	-1.2498	-0.793822	-0.870192
Q9BYJ9	YTHDF1	4.18104	4.59933	2.51575e-05	0.0183333	+	C33A_C93	2.06386	22.0234	+	C20orf21	YTH domain-containing family protein 1 OS=Homo sapiens OX=9606 GN=YTHDF1 PE=1 SV=1	0	30.9	14	6	85	2	559	60.8	8.79	30.55	6	3	0.42597	0.699927	0.631633	-1.45756	-1.41278	-1.56373	0.176052	0.678895	0.374705
Q14978	NOLC1	2.80986	3.44025	0.000362867	0.0156585	+	C33A_C93	1.4905	11.192	+	KIAA0035 NS5ATP13	Nucleolar and coiled-body phosphoprotein 1 OS=Homo sapiens OX=9606 GN=NOLC1 PE=1 SV=2	0	30.858	12	7	70	7	699	73.6	9.47	20.41	7	0	0.47221	0.51398	0.294678	-0.945577	-0.951611	-1.29343	0.226989	-0.502505	-0.461721
Q6P1M0	SLC27A4	0.897775	0.275213	0.530624	0.659785			-0.155575	-0.68562		ACSVL4 FATP4	Long-chain fatty acid transport protein 4 OS=Homo sapiens OX=9606 GN=SLC27A4 PE=1 SV=1	0	30.818	14	8	178	8	643	72	8.47	63.11	8	0	-0.0208889	-0.0299747	0.514487	0.17394	0.169958	0.586451	-0.327797	0.322948	0.144964
O14602	EIF1AY	1.30588	0.732539	0.185123	0.235065			0.385024	1.59874			Eukaryotic translation initiation factor 1A, Y-chromosomal OS=Homo sapiens OX=9606 GN=EIF1AY PE=1 SV=4	0	30.814	57	6	88	6	144	16.4	5.24	33.85	6	0	1.97915	1.30156	1.98646	1.44338	1.21056	1.45816	1.18031	1.87083	1.57341
Q6RFH5	WDR74	2.65928	2.63413	0.00232205	0.0212931	+	C33A_C93	1.41103	6.89317	+	NSA1	WD repeat-containing protein 74 OS=Homo sapiens OX=9606 GN=WDR74 PE=1 SV=1	0	30.794	21	8	81	8	385	42.4	8.32	34.95	8	0	-0.0897592	0.250509	-0.116551	-1.67862	-1.10004	-1.41025	0.0980847	-0.402191	0.0924467
Q9NZN5	ARHGEF12	1.16303	0.704863	0.197305	0.248056			0.217889	1.5447		KIAA0382 LARG	Rho guanine nucleotide exchange factor 12 OS=Homo sapiens OX=9606 GN=ARHGEF12 PE=1 SV=1	0	30.782	7	9	83	9	1544	173.1	5.74	22.25	9	0	-0.234556	-0.677522	-0.375552	-0.707059	-0.541094	-0.693144	0.00846435	-0.24806	-0.122614
P49207	RPL34	1.35573	1.40446	0.0394035	0.0720407			0.439066	3.01378			Large ribosomal subunit protein eL34 OS=Homo sapiens OX=9606 GN=RPL34 PE=1 SV=3	0	30.773	38	7	410	7	117	13.3	11.47	198.28	7	0	5.80936	5.81348	5.53922	5.42495	5.05645	5.36345	5.97754	5.00598	5.69444
Q6ZNB6	NFXL1	1.85181	1.4501	0.0354735	0.0696496			0.88894	3.12155	+	OZFP	NF-X1-type zinc finger protein NFXL1 OS=Homo sapiens OX=9606 GN=NFXL1 PE=1 SV=2	0	30.721	14	7	105	7	911	101.3	8.41	42.61	7	0	1.19292	0.999021	1.18275	-0.317804	0.475529	0.550149	1.22681	0.105809	1.10515
Q09161	NCBP1	0.781999	0.500142	0.316125	0.393227			-0.354761	-1.14483		CBP80 NCBP	Nuclear cap-binding protein subunit 1 OS=Homo sapiens OX=9606 GN=NCBP1 PE=1 SV=1	0	30.663	11	8	85	8	790	91.8	6.43	32.82	8	0	0.0321732	-0.145051	-0.147356	-0.131845	0.864876	0.0710174	0.0255079	-0.554884	-0.360027
Q96N66	MBOAT7	0.52558	2.48389	0.00328177	0.0237834	+	C33A_C93	-0.928017	-6.28055	+	BB1 LENG4 OACT7	Lysophospholipid acyltransferase 7 OS=Homo sapiens OX=9606 GN=MBOAT7 PE=1 SV=2	0	30.604	15	6	137	6	472	52.7	8.97	66.95	6	0	2.24995	1.93351	1.90221	2.76373	3.0775	3.02849	1.82851	0.702535	1.94442
Q9Y4E1	WASHC2C	0.783579	0.5663	0.271456	0.338018			-0.351849	-1.27461		FAM21C KIAA0592 VPEF	WASH complex subunit 2C OS=Homo sapiens OX=9606 GN=WASHC2C PE=1 SV=5	0	30.602	10	8	46	8	1341	147.1	4.81	8.69	8	0	0.13772	-0.0876595	-0.268027	0.773601	-0.030816	0.0947945	1.01845	0.187343	-0.0562019
Q9H4B6	SAV1	1.66173	0.923296	0.119317	0.158573			0.732688	1.97621		WW45	Protein salvador homolog 1 OS=Homo sapiens OX=9606 GN=SAV1 PE=1 SV=2	0	30.585	19	6	147	6	383	44.6	9.09	72.57	6	0	0.572222	0.821745	1.77686	0.243094	0.421051	0.308613	1.18133	2.4894	1.16307
Q99623	PHB2	0.724825	1.01645	0.0962827	0.138115			-0.464294	-2.1656		BAP REA	Prohibitin-2 OS=Homo sapiens OX=9606 GN=PHB2 PE=1 SV=2	0	30.479	30	7	152	7	299	33.3	9.83	67.24	7	0	1.82636	2.09986	1.63723	2.40982	1.99473	2.55179	1.88447	1.9344	2.17984
Q9BVP2	GNL3	1.27312	2.70878	0.00195531	0.0195283	+	C33A_C93	0.348372	7.21642	+	E2IG3 NS	Guanine nucleotide-binding protein-like 3 OS=Homo sapiens OX=9606 GN=GNL3 PE=1 SV=2	0	30.452	16	7	115	7	549	62	9.16	36.77	7	0	0.642057	0.687991	0.722806	0.273122	0.318381	0.416237	0.631899	0.0816469	0.935892
P63241	EIF5A	1.20951	0.661269	0.218138	0.27346			0.274424	1.45973			Eukaryotic translation initiation factor 5A-1 OS=Homo sapiens OX=9606 GN=EIF5A PE=1 SV=2	0	30.449	34	4	177	4	154	16.8	5.24	75.4	4	0	2.50767	2.86372	2.77729	2.13549	2.62912	2.5608	2.43718	2.17101	2.10172
P16402	H1-3	1.03232	0.0583111	0.874357	0.941143			0.0458919	0.168513		H1F3 HIST1H1D	Histone H1.3 OS=Homo sapiens OX=9606 GN=H1-3 PE=1 SV=2	0	30.413	15	5	234	5	221	22.3	11.02	119.56	5	0	3.24378	3.28846	3.16215	3.60866	3.2641	2.68396	3.2766	2.9266	3.06031
P10412	H1-4	1.03232	0.0583111	0.874357	0.940817			0.0458919	0.168513		H1F4 HIST1H1E	Histone H1.4 OS=Homo sapiens OX=9606 GN=H1-4 PE=1 SV=2	0	30.413	16	5	234	5	219	21.9	11.03	119.56	5	0	3.24378	3.28846	3.16215	3.60866	3.2641	2.68396	3.2766	2.9266	3.06031
P16403	H1-2	1.03232	0.0583111	0.874357	0.940492			0.0458919	0.168513		H1F2 HIST1H1C	Histone H1.2 OS=Homo sapiens OX=9606 GN=H1-2 PE=1 SV=2	0	30.413	16	5	234	5	213	21.4	10.93	119.56	5	0	3.24378	3.28846	3.16215	3.60866	3.2641	2.68396	3.2766	2.9266	3.06031
Q07954	LRP1	0.478024	1.99422	0.010134	0.0347511	+	C33A_C93	-1.06485	-4.58645	+	A2MR APR	Prolow-density lipoprotein receptor-related protein 1 OS=Homo sapiens OX=9606 GN=LRP1 PE=1 SV=2	0	30.406	2	10	59	10	4544	504.3	5.39	15.07	10	0	-1.50173	-2.23245	-2.01525	-1.00739	-0.721682	-0.825819	-1.69895	-1.44844	-1.56383
P62979	RPS27A	1.11984	0.14986	0.708174	0.8194			0.163297	0.402094		UBA80 UBCEP1	Ubiquitin-ribosomal protein eS31 fusion protein OS=Homo sapiens OX=9606 GN=RPS27A PE=1 SV=2	0	30.404	47	7	162	7	156	18	9.64	65.69	7	0	2.31398	1.58293	1.68296	2.27017	1.71158	1.10823	1.45137	1.51208	1.82451
Q9P246	STIM2	2.3313	1.18898	0.0647168	0.102895			1.22114	2.52924	+	KIAA1482	Stromal interaction molecule 2 OS=Homo sapiens OX=9606 GN=STIM2 PE=1 SV=2	0	30.368	17	9	71	9	746	83.9	6.76	26.19	9	0	-1.69104	-0.0742974	-1.20196	-2.30931	-2.22779	-2.09361	-0.401093	0.231788	-0.742346
P51398	DAP3	1.23727	1.65675	0.0220421	0.0513422			0.307158	3.63602		MRPS29	Small ribosomal subunit protein mS29 OS=Homo sapiens OX=9606 GN=DAP3 PE=1 SV=1	0	30.363	30	8	68	8	398	45.5	8.88	13.48	8	0	0.856739	0.96086	0.985524	0.631011	0.754646	0.495991	0.853884	0.83526	0.843515
Q9NNW5	WDR6	0.934502	0.192457	0.642011	0.77019			-0.0977301	-0.502047			tRNA (34-2'-O)-methyltransferase regulator WDR6 OS=Homo sapiens OX=9606 GN=WDR6 PE=1 SV=1	0	30.323	10	8	69	8	1121	121.6	6.87	21.75	8	0	0.130388	-0.0453465	-0.0690296	0.449172	0.0394294	-0.179399	0.291206	-1.11745	-0.746052
Q02818	NUCB1	0.804948	0.734829	0.184149	0.233177			-0.313032	-1.60322		NUC	Nucleobindin-1 OS=Homo sapiens OX=9606 GN=NUCB1 PE=1 SV=4	0	30.305	18	7	96	7	461	53.8	5.25	39.49	7	0	0.117596	-0.174699	0.466107	0.346071	0.559718	0.442311	1.22989	1.93752	1.92351
Q96C92	ENTR1	1.02301	0.0510891	0.889019	0.948944			0.0328202	0.148655		SDCCAG3	Endosome-associated-trafficking regulator 1 OS=Homo sapiens OX=9606 GN=ENTR1 PE=1 SV=3	0	30.276	24	8	108	8	435	47.9	5.14	38.56	8	0	0.582153	-0.108849	-0.00581323	0.118135	0.210571	0.0403246	1.19047	1.70972	1.30059
Q9NTK5	OLA1	1.30273	0.729748	0.186317	0.235642			0.381535	1.59329		GTPBP9	Obg-like ATPase 1 OS=Homo sapiens OX=9606 GN=OLA1 PE=1 SV=2	0	30.254	32	8	71	8	396	44.7	7.81	19.91	8	0	-0.713161	-0.215	-0.743283	-1.25066	-0.887595	-0.677791	-1.06625	-1.10649	-1.39154
Q9BYW2	SETD2	2.60527	0.94801	0.112717	0.15258			1.38143	2.02606		HIF1 HYPB KIAA1732 KMT3A SET2	Histone-lysine N-methyltransferase SETD2 OS=Homo sapiens OX=9606 GN=SETD2 PE=1 SV=3	0	30.206	5	9	37	9	2564	287.4	6.14	11.65	9	0	-3.50155	-3.2383	-1.84121	-4.05409	-5.0919	-3.57936	-3.00991	-1.60767	-2.50763
Q99590	SCAF11	1.35874	0.514351	0.305949	0.38047			0.442268	1.17281		CASP11 SFRS2IP SIP1 SRSF2IP	Protein SCAF11 OS=Homo sapiens OX=9606 GN=SCAF11 PE=1 SV=2	0	30.202	8	8	67	8	1463	164.6	8.41	17.67	8	0	1.25027	0.393384	1.39263	0.490368	0.249392	0.969714	0.849859	1.66663	0.993243
Q8TBB5	KLHDC4	1.86566	4.11081	7.74794e-05	0.00709677	+	C33A_C93	0.899689	16.5816	+		Kelch domain-containing protein 4 OS=Homo sapiens OX=9606 GN=KLHDC4 PE=1 SV=1	0	30.155	16	7	86	7	520	57.9	5.72	33.48	7	0	1.81442	1.87429	1.87516	0.854369	0.999318	1.01111	2.12066	1.45243	2.1617
O14776	TCERG1	1.17688	1.15733	0.0696104	0.108028			0.23497	2.46108		CA150 TAF2S	Transcription elongation regulator 1 OS=Homo sapiens OX=9606 GN=TCERG1 PE=1 SV=2	0	30.147	9	8	105	8	1098	123.8	8.65	40.19	8	0	-0.459639	-0.345537	-0.187199	-0.672988	-0.514105	-0.510192	-0.449881	-1.79514	-0.383278
Q9BZL6	PRKD2	0.933123	0.0617487	0.867464	0.938589			-0.0998613	-0.177878		PKD2	Serine/threonine-protein kinase D2 OS=Homo sapiens OX=9606 GN=PRKD2 PE=1 SV=3	0	30.145	12	8	76	8	878	96.7	6.84	33.49	8	0	-1.01442	-2.24052	-1.05531	-1.74119	-0.553383	-1.71609	-2.12583	-2.03883	-2.13991
Q58FG0	HSP90AA5P	1.31527	0.451859	0.353298	0.44381			0.395357	1.04919		HSP90AE	Putative heat shock protein HSP 90-alpha A5 OS=Homo sapiens OX=9606 GN=HSP90AA5P PE=2 SV=1	0	30.138	14	6	128	4	334	38.7	6.57	62.11	6	0	2.01144	2.43341	2.42532	1.97197	1.25335	2.45879	2.33837	2.50388	2.46387
Q9BU23	LMF2	0.840361	0.191437	0.643521	0.77078			-0.250918	-0.499703		TMEM112B TMEM153	Lipase maturation factor 2 OS=Homo sapiens OX=9606 GN=LMF2 PE=1 SV=2	0	30.11	13	7	89	7	707	79.6	10.1	32.28	7	0	0.990683	0.612305	-0.270435	0.682272	1.28246	0.120578	0.740165	0.964204	0.911244
A6NIZ1	RAP1BL	0.68297	1.58655	0.0259091	0.0561866			-0.550107	-3.45613	+		Ras-related protein Rap-1b-like protein OS=Homo sapiens OX=9606 GN=RAP1BL PE=2 SV=1	0	30.11	51	7	186	1	184	20.9	5.48	95.03	7	0	1.58418	1.29782	1.52558	1.82816	1.95451	2.27524	1.67504	1.0448	1.95233
Q93050	ATP6V0A1	0.275756	3.57392	0.000266734	0.0155429	+	C33A_C93	-1.85854	-12.11	+	ATP6N1 ATP6N1A VPP1	V-type proton ATPase 116 kDa subunit a 1 OS=Homo sapiens OX=9606 GN=ATP6V0A1 PE=1 SV=3	0	30.106	11	7	119	7	837	96.4	6.43	52.5	7	0	0.69669	0.859147	0.415866	2.37068	2.65598	2.52066	0.0063948	-0.251862	0.00449938
Q5JTZ9	AARS2	1.15263	0.217225	0.606422	0.733137			0.204925	0.558284		AARSL KIAA1270	Alanine--tRNA ligase, mitochondrial OS=Homo sapiens OX=9606 GN=AARS2 PE=1 SV=1	0	30.069	10	9	40	9	985	107.3	6.27	9.22	9	0	-1.04814	-0.655583	-1.41143	-0.906528	-0.991889	-1.83151	-0.615009	-1.63235	-0.85239
P60228	EIF3E	0.76069	0.862009	0.137401	0.179629			-0.394619	-1.85369		EIF3S6 INT6	Eukaryotic translation initiation factor 3 subunit E OS=Homo sapiens OX=9606 GN=EIF3E PE=1 SV=1	0	30.031	16	6	115	6	445	52.2	6.04	60.18	6	0	1.91947	1.92021	2.46659	2.28444	2.55264	2.65304	0.43915	0.635334	1.04465
P31040	SDHA	1.32627	0.45375	0.351763	0.442059			0.407379	1.05296		SDH2 SDHF	Succinate dehydrogenase [ubiquinone] flavoprotein subunit, mitochondrial OS=Homo sapiens OX=9606 GN=SDHA PE=1 SV=2	0	30.019	17	8	63	8	664	72.6	7.39	20.6	8	0	-1.78811	-2.14631	-1.85663	-3.07967	-1.97376	-1.95977	-1.70214	-2.83888	-1.80604
P52789	HK2	0.837881	0.0703672	0.850419	0.927546			-0.255183	-0.201119			Hexokinase-2 OS=Homo sapiens OX=9606 GN=HK2 PE=1 SV=2	0	30.012	12	9	65	8	917	102.3	6.05	19.65	9	0	-4.30014	-1.49802	-1.69298	-4.02392	-1.34662	-1.35504	-0.717012	-2.34183	-0.783382
P37173	TGFBR2	0.805686	0.288697	0.514402	0.64144			-0.31171	-0.714496			TGF-beta receptor type-2 OS=Homo sapiens OX=9606 GN=TGFBR2 PE=1 SV=2	0	29.979	13	7	116	7	567	64.5	5.9	37.32	7	0	1.32584	1.03881	0.481189	1.60971	0.542518	1.62874	0.351815	0.474621	1.19019
P62714	PPP2CB	0.895005	1.97815	0.0105159	0.0353015	+	C33A_C93	-0.160033	-4.53765			Serine/threonine-protein phosphatase 2A catalytic subunit beta isoform OS=Homo sapiens OX=9606 GN=PPP2CB PE=1 SV=1	0	29.96	24	6	151	4	309	35.6	5.43	79.05	6	2	1.39154	1.46439	1.47822	1.57209	1.6487	1.59345	1.65477	1.99102	1.72926
P67775	PPP2CA	0.895005	1.97815	0.0105159	0.0352282	+	C33A_C93	-0.160033	-4.53765			Serine/threonine-protein phosphatase 2A catalytic subunit alpha isoform OS=Homo sapiens OX=9606 GN=PPP2CA PE=1 SV=1	0	29.96	24	6	151	4	309	35.6	5.54	79.05	6	0	1.39154	1.46439	1.47822	1.57209	1.6487	1.59345	1.65477	1.99102	1.72926
Q8IV08	PLD3	0.651249	1.29646	0.050529	0.0835502			-0.61872	-2.76617			5'-3' exonuclease PLD3 OS=Homo sapiens OX=9606 GN=PLD3 PE=1 SV=1	0	29.96	16	7	98	7	490	54.7	6.47	43.59	7	0	0.983202	0.305985	0.435113	1.28401	1.26931	1.02714	0.524925	-0.897894	0.569189
Q9H6Y2	WDR55	0.502791	1.06867	0.085375	0.126108			-0.99197	-2.27373			WD repeat-containing protein 55 OS=Homo sapiens OX=9606 GN=WDR55 PE=1 SV=2	0	29.958	23	6	50	6	383	42	4.92	17.34	6	0	-1.53996	-0.687253	-2.10224	-0.160382	-0.599557	-0.593599	-1.69419	-0.400939	-0.419785
P06737	PYGL	0.23779	3.98294	0.000104007	0.0089697	+	C33A_C93	-2.07224	-15.3901	+		Glycogen phosphorylase, liver form OS=Homo sapiens OX=9606 GN=PYGL PE=1 SV=4	0	29.942	12	9	133	7	847	97.1	7.17	54.37	9	1	0.844475	0.830702	1.15948	3.13766	2.86247	3.05124	2.83382	1.01249	2.40424
O15226	NKRF	0.418512	0.413292	0.386107	0.488791			-1.25666	-0.971964		ITBA4 NRF	NF-kappa-B-repressing factor OS=Homo sapiens OX=9606 GN=NKRF PE=1 SV=2	0	29.91	12	8	132	8	690	77.6	8.79	47.25	8	0	-4.07184	-1.1711	-4.3407	-0.96574	-1.3207	-3.52723	-1.80992	-1.7931	-1.77327
Q58EX7	PLEKHG4	1.3873	0.829653	0.148029	0.190313			0.472277	1.78955		PRTPHN1	Puratrophin-1 OS=Homo sapiens OX=9606 GN=PLEKHG4 PE=1 SV=1	0	29.902	10	8	70	8	1191	130.7	5.64	28.63	8	0	0.0636482	-0.283019	0.0021108	-1.00547	-0.189813	-0.438808	0.0692556	0.304441	-0.0897217
Q4G0J3	LARP7	1.40603	2.42946	0.00371999	0.0230502	+	C33A_C93	0.491627	6.07036	+		La-related protein 7 OS=Homo sapiens OX=9606 GN=LARP7 PE=1 SV=1	0	29.895	23	9	56	9	582	66.9	9.55	11.89	9	0	4.27725	4.16416	4.13831	3.72705	3.57171	3.80607	4.57737	3.86087	4.24589
O14893	GEMIN2	2.3216	4.12677	7.46848e-05	0.00785714	+	C33A_C93	1.21512	16.7364	+	SIP1	Gem-associated protein 2 OS=Homo sapiens OX=9606 GN=GEMIN2 PE=1 SV=1	0	29.832	22	6	68	6	280	31.6	5.58	27.42	6	0	0.737742	0.604793	0.503281	-0.65008	-0.584507	-0.564948	0.475143	0.546399	0.301153
Q9BTW9	TBCD	0.835202	0.459119	0.347441	0.435276			-0.259803	-1.06364		KIAA0988 SSD1 TFCD	Tubulin-specific chaperone D OS=Homo sapiens OX=9606 GN=TBCD PE=1 SV=2	0	29.829	9	7	66	7	1192	132.5	6.19	20.21	7	0	-1.15487	-0.581965	-0.569345	-0.344538	-0.807565	-0.374667	-0.785389	-0.71621	-0.263288
Q66K14	TBC1D9B	0.583128	1.3366	0.0460684	0.0804652			-0.778116	-2.85701	+	KIAA0676	TBC1 domain family member 9B OS=Homo sapiens OX=9606 GN=TBC1D9B PE=1 SV=3	0	29.82	8	8	63	8	1250	140.4	5.25	23.06	8	0	-1.54883	-1.24422	-0.632739	-0.436535	-0.357608	-0.297297	-0.759538	-2.11791	-0.760519
Q01581	HMGCS1	1.1125	0.446531	0.357659	0.449344			0.1538	1.03857		HMGCS	Hydroxymethylglutaryl-CoA synthase, cytoplasmic OS=Homo sapiens OX=9606 GN=HMGCS1 PE=1 SV=2	0	29.81	18	8	155	8	520	57.3	5.41	60.61	8	0	1.16281	1.42239	1.2319	0.875799	1.29924	1.18065	0.860267	1.20805	1.25093
Q9NY93	DDX56	1.59891	1.3189	0.0479847	0.0820491			0.67709	2.81678		DDX21 NOH61	Probable ATP-dependent RNA helicase DDX56 OS=Homo sapiens OX=9606 GN=DDX56 PE=1 SV=1	0	29.718	19	8	76	8	547	61.6	9.26	31.52	8	0	-0.154128	-0.203682	-0.670629	-1.20517	-0.669609	-1.18493	-0.0528803	-0.0695924	-0.434231
P36915	GNL1	1.09258	0.658375	0.219596	0.274471			0.127739	1.4541		HSR1	Guanine nucleotide-binding protein-like 1 OS=Homo sapiens OX=9606 GN=GNL1 PE=1 SV=2	0	29.706	19	9	86	9	607	68.6	5.8	34.81	9	0	-0.0347675	-0.0877622	0.0628077	-0.298222	-0.0900615	-0.0546556	0.311549	0.485096	0.364407
P31942	HNRNPH3	0.661499	1.83526	0.0146131	0.0400842	+	C33A_C93	-0.596189	-4.11995	+	HNRPH3	Heterogeneous nuclear ribonucleoprotein H3 OS=Homo sapiens OX=9606 GN=HNRNPH3 PE=1 SV=2	0	29.702	24	7	281	6	346	36.9	6.87	140.94	7	0	3.38445	3.26292	3.59186	3.87917	3.92443	4.22418	4.13643	4.36105	3.83054
P42566	EPS15	0.994986	0.010251	0.976673	0.990472			-0.00725214	-0.0311094		AF1P	Epidermal growth factor receptor substrate 15 OS=Homo sapiens OX=9606 GN=EPS15 PE=1 SV=2	0	29.695	11	8	62	8	896	98.6	4.64	25.62	8	0	-0.672845	-0.31003	-0.171652	-0.215964	-0.181921	-0.734886	0.127064	-0.808052	-0.748756
P16989	YBX3	1.20031	0.57104	0.26851	0.335246			0.263413	1.28387		CSDA DBPA	Y-box-binding protein 3 OS=Homo sapiens OX=9606 GN=YBX3 PE=1 SV=4	0	29.691	16	6	192	2	372	40.1	9.77	92.98	6	0	-0.913121	-1.04323	-0.929158	-0.83403	-1.50125	-1.34047	-1.16732	-1.81077	-1.39735
O00148	DDX39A	1.13406	0.804194	0.156966	0.200928			0.181496	1.7393		DDX39	ATP-dependent RNA helicase DDX39A OS=Homo sapiens OX=9606 GN=DDX39A PE=1 SV=2	0	29.66	15	6	176	2	427	49.1	5.68	83.76	6	4	2.41192	2.51803	2.62561	2.18097	2.36041	2.4697	2.84088	2.77959	2.64138
Q9H0U3	MAGT1	1.16426	0.978474	0.105081	0.146748			0.219412	2.08789		IAG2	Magnesium transporter protein 1 OS=Homo sapiens OX=9606 GN=MAGT1 PE=1 SV=1	0	29.61	16	7	126	7	335	38	9.63	56.38	7	0	2.67206	2.63492	2.37209	2.38328	2.24804	2.38951	2.66091	2.07525	2.36779
P20839	IMPDH1	1.3786	0.710782	0.194634	0.245088			0.463199	1.55625		IMPD1	Inosine-5'-monophosphate dehydrogenase 1 OS=Homo sapiens OX=9606 GN=IMPDH1 PE=1 SV=2	0	29.566	19	8	125	6	514	55.4	6.9	58.11	8	0	-1.257	-1.25772	-0.869763	-1.29698	-2.12674	-1.35037	-1.3018	-1.25362	-0.920221
Q9UJU6	DBNL	0.752896	1.23909	0.0576642	0.0953067			-0.409478	-2.63861		CMAP SH3P7	Drebrin-like protein OS=Homo sapiens OX=9606 GN=DBNL PE=1 SV=1	0	29.566	21	8	61	8	430	48.2	5.05	25.47	8	0	0.581738	0.435247	0.681774	0.812583	1.24943	0.865178	1.06305	1.05211	1.12011
P62879	GNB2	0.926343	0.659586	0.218985	0.274096			-0.110381	-1.45646			Guanine nucleotide-binding protein G(I)/G(S)/G(T) subunit beta-2 OS=Homo sapiens OX=9606 GN=GNB2 PE=1 SV=3	0	29.562	20	7	275	2	340	37.3	6	143.41	7	0	0.316349	0.494244	0.265294	0.414068	0.473637	0.519325	0.542194	0.256428	0.290627
Q8IYB3	SRRM1	4.49205	1.56355	0.0273181	0.0629042			2.16737	3.39838	+	SRM160	Serine/arginine repetitive matrix protein 1 OS=Homo sapiens OX=9606 GN=SRRM1 PE=1 SV=2	0	29.47	9	7	58	7	904	102.3	11.84	14.09	7	0	-0.530826	-0.658295	-2.41493	-3.045	-3.71225	-3.34892	-1.20058	-0.824696	-2.36828
P78362	SRPK2	0.992827	0.037797	0.916649	0.963617			-0.0103859	-0.111422			SRSF protein kinase 2 OS=Homo sapiens OX=9606 GN=SRPK2 PE=1 SV=3	0	29.446	15	8	69	7	688	77.5	4.97	20.7	8	0	-0.584698	-0.695515	-0.564367	-0.613551	-0.454947	-0.744924	-0.704164	-0.571363	-0.777926
P07384	CAPN1	1.17686	0.322828	0.475524	0.593016			0.234941	0.786558		CANPL1	Calpain-1 catalytic subunit OS=Homo sapiens OX=9606 GN=CAPN1 PE=1 SV=1	0	29.349	13	8	93	8	714	81.8	5.67	36.49	8	0	0.193924	0.669026	0.976301	0.00750454	0.659637	0.467289	-1.65	0.0761524	0.219461
P45974	USP5	2.68306	2.65337	0.00222139	0.0207788	+	C33A_C93	1.42388	6.97527	+	ISOT	Ubiquitin carboxyl-terminal hydrolase 5 OS=Homo sapiens OX=9606 GN=USP5 PE=1 SV=2	0	29.252	13	7	86	7	858	95.7	5.03	38.25	7	0	0.532076	1.07884	0.727529	-0.395791	-0.812216	-0.725182	0.0263219	0.0404281	0.21802
Q6IBW4	NCAPH2	1.4294	1.66162	0.0217961	0.0513869			0.515407	3.64872	+	CAPH2	Condensin-2 complex subunit H2 OS=Homo sapiens OX=9606 GN=NCAPH2 PE=1 SV=1	0	29.244	11	7	76	7	605	68.2	4.74	30.64	7	0	0.895756	1.21613	1.28294	0.570044	0.515081	0.763486	0.920006	0.574288	0.932866
P09661	SNRPA1	1.11267	0.194691	0.638718	0.768319			0.154023	0.507171			U2 small nuclear ribonucleoprotein A' OS=Homo sapiens OX=9606 GN=SNRPA1 PE=1 SV=2	0	29.222	36	8	108	8	255	28.4	8.62	44.94	8	0	0.166092	0.306254	1.0455	0.23981	0.617761	0.198211	0.420249	0.997616	0.407814
Q9H4A4	RNPEP	2.86955	0.57533	0.26587	0.332388			1.52083	1.29225		APB	Aminopeptidase B OS=Homo sapiens OX=9606 GN=RNPEP PE=1 SV=2	0	29.221	16	8	91	8	650	72.5	5.74	34.12	8	0	-2.90478	0.628001	0.14918	-3.03164	-1.85079	-1.80765	0.0606625	-0.491341	-0.00353432
P82912	MRPS11	3.43318	2.97761	0.0010529	0.0136623	+	C33A_C93	1.77954	8.4951	+	RPMS11	Small ribosomal subunit protein uS11m OS=Homo sapiens OX=9606 GN=MRPS11 PE=1 SV=2	0	29.212	29	4	68	4	194	20.6	10.81	21.92	4	0	0.231358	0.78432	0.846878	-1.16031	-1.28782	-1.02794	1.21677	0.539859	0.725101
Q96RT1	ERBIN	0.512541	0.845178	0.142831	0.185343			-0.964262	-1.82028		ERBB2IP KIAA1225 LAP2	Erbin OS=Homo sapiens OX=9606 GN=ERBIN PE=1 SV=2	0	29.192	9	9	81	9	1412	158.2	5.5	25.69	9	0	-0.79648	-2.4485	-2.19737	-0.853414	-0.625838	-1.07031	-0.348565	-2.29136	-0.217613
O15357	INPPL1	0.801171	0.289857	0.51303	0.63915			-0.319818	-0.716968		SHIP2	Phosphatidylinositol 3,4,5-trisphosphate 5-phosphatase 2 OS=Homo sapiens OX=9606 GN=INPPL1 PE=1 SV=2	0	29.108	10	10	89	10	1258	138.5	6.54	21.6	10	0	-0.985149	-1.00049	0.0938021	-0.0408332	-0.831305	-0.0602491	0.534961	0.530888	0.298363
P49792	RANBP2	0.883474	0.204054	0.625095	0.753087			-0.17874	-0.528535		NUP358	E3 SUMO-protein ligase RanBP2 OS=Homo sapiens OX=9606 GN=RANBP2 PE=1 SV=2	0	29.098	4	9	42	9	3224	358	6.2	11.78	9	0	-1.99892	-1.54703	-1.32319	-0.898864	-1.67859	-1.75546	-1.52074	-1.59895	-1.15955
Q9NZI8	IGF2BP1	0.70861	1.31803	0.0480803	0.0822735			-0.496937	-2.81483		CRDBP VICKZ1 ZBP1	Insulin-like growth factor 2 mRNA-binding protein 1 OS=Homo sapiens OX=9606 GN=IGF2BP1 PE=1 SV=2	0	29.058	15	7	79	6	577	63.4	9.2	26.28	7	0	-0.173876	-0.416891	-0.595719	0.211335	0.245527	-0.152536	-0.329038	-0.35473	-0.429884
P23634	ATP2B4	0.578212	2.37835	0.00418452	0.0225794	+	C33A_C93	-0.79033	-5.87842	+	ATP2B2 MXRA1	Plasma membrane calcium-transporting ATPase 4 OS=Homo sapiens OX=9606 GN=ATP2B4 PE=1 SV=2	0	29.057	10	10	66	5	1241	137.8	6.6	22.93	10	2	-0.454484	-0.888697	-0.781614	0.0574439	0.14539	0.0433623	-0.735681	-1.13342	-0.834673
Q8TD47	RPS4Y2	1.28158	1.53762	0.0289987	0.065963			0.357926	3.33395		RPS4Y2P	Small ribosomal subunit protein eS4, Y isoform 2 OS=Homo sapiens OX=9606 GN=RPS4Y2 PE=2 SV=3	0	29.024	24	7	313	7	263	29.3	10.08	165.02	7	0	5.55257	5.39254	5.30573	5.15633	4.90176	5.11898	5.7668	4.81316	5.1645
Q12986	NFX1	1.38345	0.224943	0.59574	0.723061			0.468268	0.575563		NFX2	Transcriptional repressor NF-X1 OS=Homo sapiens OX=9606 GN=NFX1 PE=1 SV=2	0	28.971	9	8	50	8	1120	124.3	8.24	17.33	8	0	-2.87497	-3.51678	-2.1419	-3.27578	-4.56076	-2.10193	-4.6345	-3.34266	-3.41011
Q9BT67	NDFIP1	1.46415	0.96859	0.1075	0.149126			0.550067	2.06778		N4WBP5	NEDD4 family-interacting protein 1 OS=Homo sapiens OX=9606 GN=NDFIP1 PE=1 SV=1	0	28.938	30	6	128	6	221	24.9	4.68	60.89	6	0	1.81449	1.50253	2.16495	0.909392	1.49248	1.4299	1.98997	1.75508	2.24997
P50402	EMD	1.68354	1.88819	0.0129364	0.0368831	+	C33A_C93	0.751496	4.27134	+	EDMD STA	Emerin OS=Homo sapiens OX=9606 GN=EMD PE=1 SV=1	0	28.906	32	7	146	7	254	29	5.5	56.26	7	0	-1.7345	-1.35939	-1.26206	-2.07087	-2.40187	-2.13772	-1.17806	-0.945493	-0.821932
O60678	PRMT3	0.992981	0.0361827	0.920062	0.965319			-0.0101625	-0.106837		HRMT1L3	Protein arginine N-methyltransferase 3 OS=Homo sapiens OX=9606 GN=PRMT3 PE=1 SV=4	0	28.863	15	7	112	7	531	59.9	5.35	38.22	7	0	1.11173	0.854193	1.12829	0.987167	1.10487	1.03267	1.33284	1.30771	1.25978
P00367	GLUD1	1.99813	0.94031	0.114733	0.154507			0.998649	2.0105		GLUD	Glutamate dehydrogenase 1, mitochondrial OS=Homo sapiens OX=9606 GN=GLUD1 PE=1 SV=2	0	28.848	18	8	82	8	558	61.4	7.8	37.08	8	0	-0.177004	-0.0217626	-0.0395248	-0.231384	-1.05951	-1.94335	-0.475442	-1.6556	-0.584639
Q96G74	OTUD5	1.76498	1.82193	0.0150686	0.0404014	+	C33A_C93	0.819655	4.08241	+		OTU domain-containing protein 5 OS=Homo sapiens OX=9606 GN=OTUD5 PE=1 SV=1	0	28.795	14	6	44	6	571	60.6	6.54	26.55	6	0	0.900679	0.658312	1.09523	-0.212699	0.32705	0.0809026	1.74453	2.28492	1.86593
P41273	TNFSF9	0.594096	2.0453	0.00900954	0.0316178	+	C33A_C93	-0.751233	-4.74416	+		Tumor necrosis factor ligand superfamily member 9 OS=Homo sapiens OX=9606 GN=TNFSF9 PE=1 SV=1	0	28.779	39	7	109	7	254	26.6	7.02	47.34	7	0	1.25253	1.17077	0.749443	1.85234	1.81738	1.75673	1.03831	0.0292791	0.552058
Q92673	SORL1	1.25909	0.42272	0.377815	0.476863			0.332377	0.990924		C11orf32	Sortilin-related receptor OS=Homo sapiens OX=9606 GN=SORL1 PE=1 SV=2	0	28.756	5	9	59	9	2214	248.3	5.55	14.85	9	0	-1.10281	-2.12252	-2.0195	-2.06738	-1.93805	-2.23652	-2.07594	-1.85786	-0.497746
P13797	PLS3	0.475059	0.393579	0.404037	0.509974			-1.07382	-0.93213			Plastin-3 OS=Homo sapiens OX=9606 GN=PLS3 PE=1 SV=4	0	28.67	14	8	77	7	630	70.8	5.6	25.09	8	0	-0.454058	0.0239151	-3.63007	-0.455762	-0.307996	-0.0749901	-1.73602	-1.3303	-0.367279
O00712	NFIB	1.59298	1.95995	0.0109661	0.03575	+	C33A_C93	0.671732	4.48281	+		Nuclear factor 1 B-type OS=Homo sapiens OX=9606 GN=NFIB PE=1 SV=2	0	28.606	22	7	116	5	420	47.4	8.87	51.4	7	0	0.0360241	0.122427	0.508968	-0.376846	-0.487172	-0.483759	0.381627	0.42864	0.246256
Q92562	FIG4	0.966384	0.175922	0.666926	0.788359			-0.0493313	-0.46377		KIAA0274 SAC3	Polyphosphoinositide phosphatase OS=Homo sapiens OX=9606 GN=FIG4 PE=1 SV=1	0	28.576	11	9	84	9	907	103.6	6.92	28.9	9	0	0.190405	0.188124	0.451296	0.244287	0.444582	0.28895	0.0792825	0.0651728	0.227566
P05362	ICAM1	0.507731	3.75398	0.000176204	0.0110714	+	C33A_C93	-0.977863	-13.4611	+		Intercellular adhesion molecule 1 OS=Homo sapiens OX=9606 GN=ICAM1 PE=1 SV=2	0	28.562	17	8	106	8	532	57.8	7.99	53.58	8	0	0.471453	0.42031	0.267066	1.34192	1.31083	1.43966	0.330205	0.545199	0.631656
P61026	RAB10	0.637424	1.16123	0.0689874	0.106617			-0.649676	-2.46945			Ras-related protein Rab-10 OS=Homo sapiens OX=9606 GN=RAB10 PE=1 SV=1	0	28.488	32	6	96	6	200	22.5	8.38	46.07	6	0	-0.0851579	0.789198	0.546393	0.99447	1.09673	1.10826	0.529842	-0.0659376	-0.0075531
Q9Y2U8	LEMD3	2.13351	1.21664	0.0607236	0.0993402			1.09323	2.58938	+	MAN1	Inner nuclear membrane protein Man1 OS=Homo sapiens OX=9606 GN=LEMD3 PE=1 SV=2	0	28.488	11	8	60	8	911	99.9	7.55	16.4	8	0	-1.22025	-0.951324	-1.28449	-1.4616	-2.84427	-2.42989	-1.04863	-0.796425	-1.2864
Q96CV9	OPTN	0.716346	1.37055	0.0426042	0.0755297			-0.481271	-2.93492		FIP2 GLC1E HIP7 HYPL NRP	Optineurin OS=Homo sapiens OX=9606 GN=OPTN PE=1 SV=3	0	28.469	13	8	74	8	577	65.9	5.17	18.94	8	0	-1.19694	-1.65929	-1.54726	-0.816612	-1.04264	-1.10042	-1.45962	-3.98014	-1.49887
Q8TDW0	LRRC8C	1.12142	0.303087	0.497637	0.618685			0.165325	0.745049		AD158 FAD158	Volume-regulated anion channel subunit LRRC8C OS=Homo sapiens OX=9606 GN=LRRC8C PE=1 SV=2	0	28.457	12	8	60	8	803	92.4	7.62	16.51	8	0	-1.35144	-0.962515	-0.780549	-1.27621	-0.916423	-1.39785	-1.55761	-1.76071	-1.09465
O95758	PTBP3	1.07027	0.348938	0.447778	0.565358			0.0979686	0.840813		ROD1	Polypyrimidine tract-binding protein 3 OS=Homo sapiens OX=9606 GN=PTBP3 PE=1 SV=2	0	28.451	17	7	101	6	552	59.7	9.04	42.36	7	0	0.516251	0.63619	0.776299	0.552385	0.695324	0.387125	-0.551079	0.216248	0.310813
Q14103	HNRNPD	1.28332	1.12906	0.0742914	0.113191			0.359877	2.40081		AUF1 HNRPD	Heterogeneous nuclear ribonucleoprotein D0 OS=Homo sapiens OX=9606 GN=HNRNPD PE=1 SV=1	0	28.413	20	7	111	6	355	38.4	7.81	42.39	7	0	0.850826	0.93177	0.604475	0.661905	0.319591	0.325944	0.362393	0.865962	0.662222
Q96CS3	FAF2	2.05078	0.311756	0.487802	0.607744			1.03617	0.763333		ETEA KIAA0887 UBXD8 UBXN3B	FAS-associated factor 2 OS=Homo sapiens OX=9606 GN=FAF2 PE=1 SV=2	0	28.396	15	5	108	5	445	52.6	5.62	45.54	5	0	4.79239	4.57176	4.92094	1.02075	4.9788	5.17702	4.7926	3.80592	4.59316
P19438	TNFRSF1A	1.09423	0.274995	0.53089	0.659567			0.129916	0.685152		TNFAR TNFR1	Tumor necrosis factor receptor superfamily member 1A OS=Homo sapiens OX=9606 GN=TNFRSF1A PE=1 SV=1	0	28.393	23	8	70	8	455	50.5	6.64	23.22	8	0	0.616043	0.483262	0.107884	0.0610302	0.447976	0.308435	-0.120843	-0.0520798	-0.595192
Q7Z5K2	WAPL	1.9501	1.65755	0.0220014	0.0514184			0.963547	3.63811	+	FOE KIAA0261 WAPAL	Wings apart-like protein homolog OS=Homo sapiens OX=9606 GN=WAPL PE=1 SV=1	0	28.384	9	8	109	8	1190	132.9	5.44	39.36	8	0	-0.339041	-0.64692	-0.147222	-1.30332	-1.7421	-0.978405	0.0933911	0.604646	0.181606
Q15691	MAPRE1	1.61552	1.39166	0.0405827	0.0731163			0.692003	2.98388	+		Microtubule-associated protein RP/EB family member 1 OS=Homo sapiens OX=9606 GN=MAPRE1 PE=1 SV=3	0	28.354	38	7	98	6	268	30	5.14	38.86	7	1	1.41655	2.01009	2.01888	1.35899	0.984115	1.0264	1.70565	2.08737	1.77944
Q9UGP4	LIMD1	0.969591	0.120497	0.75771	0.857982			-0.0445511	-0.330355			LIM domain-containing protein 1 OS=Homo sapiens OX=9606 GN=LIMD1 PE=1 SV=1	0	28.331	18	8	54	8	676	72.1	6.65	24.54	8	0	2.90043	3.33331	3.20686	3.15537	3.14588	3.27301	3.51088	2.9105	3.09621
O95757	HSPA4L	0.880991	0.15459	0.700502	0.814217			-0.1828	-0.413419		APG1 OSP94	Heat shock 70 kDa protein 4L OS=Homo sapiens OX=9606 GN=HSPA4L PE=1 SV=3	0	28.322	11	7	77	5	839	94.5	5.88	27.12	7	0	-2.21493	-0.843246	-1.09352	-1.14024	-1.45544	-1.00761	-1.37148	-2.40285	-4.22319
Q9NRX1	PNO1	2.01173	4.26269	5.46145e-05	0.011	+	C33A_C93	1.00844	18.1141	+		RNA-binding protein PNO1 OS=Homo sapiens OX=9606 GN=PNO1 PE=1 SV=1	0	28.32	41	7	94	7	252	27.9	9.73	40.15	7	0	1.08271	1.15922	1.25129	0.106805	0.161564	0.199533	1.38849	1.07188	1.0981
P51531	SMARCA2	1.90079	2.13089	0.0073979	0.0292029	+	C33A_C93	0.926596	5.01759	+	BAF190B BRM SNF2A SNF2L2	Probable global transcription activator SNF2L2 OS=Homo sapiens OX=9606 GN=SMARCA2 PE=1 SV=2	0	28.234	5	7	136	7	1590	181.2	7.2	62.1	7	0	0.631222	0.313257	0.398861	-0.752182	-0.480666	-0.2036	0.787733	0.16097	0.684974
Q9NZ01	TECR	1.32607	1.73252	0.0185132	0.0478854	+	C33A_C93	0.407157	3.83661		GPSN2 SC2	Very-long-chain enoyl-CoA reductase OS=Homo sapiens OX=9606 GN=TECR PE=1 SV=1	0	28.233	17	6	183	6	308	36	9.45	98.12	6	0	3.20636	2.94573	3.27106	2.6631	2.7885	2.75009	3.24134	2.83055	3.11221
Q9NXR1	NDE1	1.15772	0.624985	0.237145	0.293941			0.211281	1.38907		NUDE	Nuclear distribution protein nudE homolog 1 OS=Homo sapiens OX=9606 GN=NDE1 PE=1 SV=3	0	28.215	26	7	59	5	335	37.7	5.15	24.32	7	2	0.690237	0.70022	1.10719	0.518368	0.60294	0.742495	1.23202	1.47793	1.28188
P62826	RAN	1.14681	1.04304	0.0905649	0.130955			0.197629	2.22047		ARA24	GTP-binding nuclear protein Ran OS=Homo sapiens OX=9606 GN=RAN PE=1 SV=3	0	28.209	31	7	188	7	216	24.4	7.49	106.24	7	0	2.97148	3.13343	2.94948	2.71575	2.79909	2.94666	3.25178	2.93927	3.1415
Q92508	PIEZO1	0.455882	2.23465	0.00582575	0.0266044	+	C33A_C93	-1.13327	-5.36526	+	FAM38A KIAA0233	Piezo-type mechanosensitive ion channel component 1 OS=Homo sapiens OX=9606 GN=PIEZO1 PE=1 SV=4	0	28.188	4	8	49	8	2521	286.6	7.47	9.97	8	0	-1.63109	-1.83988	-1.22563	-0.25315	-0.411222	-0.632433	-1.06407	-0.490396	-0.957033
P46977	STT3A	0.848876	0.833515	0.146719	0.188447			-0.236375	-1.79718		ITM1 TMC	Dolichyl-diphosphooligosaccharide--protein glycosyltransferase subunit STT3A OS=Homo sapiens OX=9606 GN=STT3A PE=1 SV=2	0	28.182	14	8	68	8	705	80.5	8.07	26.6	8	0	1.17877	1.13381	0.873504	1.11685	1.39282	1.38554	0.941137	1.16506	1.23365
Q9HBD1	RC3H2	0.871471	0.223849	0.597242	0.724098			-0.198476	-0.573121		MNAB RNF164	Roquin-2 OS=Homo sapiens OX=9606 GN=RC3H2 PE=1 SV=2	0	28.155	9	8	56	7	1191	131.6	6.89	18.13	8	0	-1.42975	-1.60197	-0.813022	-0.832543	-0.833385	-1.58339	-1.38086	-0.629944	-0.843563
Q9HAU0	PLEKHA5	1.33314	1.26619	0.0541765	0.0891717			0.414832	2.69854		KIAA1686 PEPP2	Pleckstrin homology domain-containing family A member 5 OS=Homo sapiens OX=9606 GN=PLEKHA5 PE=1 SV=1	0	28.131	8	8	80	8	1116	127.4	7.53	28.96	8	0	-0.363599	-0.362	-0.0871036	-0.603325	-0.52578	-0.928093	0.064463	0.0683415	-0.354523
Q9BVI4	NOC4L	1.45006	1.61683	0.0241641	0.0535502			0.536115	3.53305	+		Nucleolar complex protein 4 homolog OS=Homo sapiens OX=9606 GN=NOC4L PE=1 SV=1	0	28.113	17	6	47	6	516	58.4	7.49	16.48	6	0	-2.06095	-1.71921	-1.93596	-2.59732	-2.50837	-2.21878	-2.89468	-2.71049	-2.87383
Q96MU7	YTHDC1	1.10414	0.0749242	0.841542	0.92239			0.142925	0.213275		KIAA1966 YT521	YTH domain-containing protein 1 OS=Homo sapiens OX=9606 GN=YTHDC1 PE=1 SV=3	0	28.067	13	8	50	8	727	84.6	6.23	15.91	8	0	-0.94512	-2.3873	-1.06031	-0.710571	-1.73604	-2.37488	-2.47994	-0.81939	-1.34971
Q8IYD1	GSPT2	1.02315	0.0840391	0.824064	0.91196			0.0330196	0.237326		ERF3B	Eukaryotic peptide chain release factor GTP-binding subunit ERF3B OS=Homo sapiens OX=9606 GN=GSPT2 PE=1 SV=2	0	28.062	12	6	105	6	628	68.8	5.43	40.94	6	0	1.22241	1.42868	1.37265	1.52601	1.30482	1.09386	1.56183	1.14225	1.15163
P10644	PRKAR1A	0.91164	0.320868	0.477674	0.59549			-0.133463	-0.782457		PKR1 PRKAR1 TSE1	cAMP-dependent protein kinase type I-alpha regulatory subunit OS=Homo sapiens OX=9606 GN=PRKAR1A PE=1 SV=1	0	28.054	18	6	140	6	381	43	5.35	59.94	6	0	0.927128	1.037	0.502331	0.982509	1.02587	0.858469	0.461684	0.000524702	0.825648
P47895	ALDH1A3	2.95475	1.18564	0.0652176	0.103549			1.56304	2.522	+	ALDH6	Retinaldehyde dehydrogenase 3 OS=Homo sapiens OX=9606 GN=ALDH1A3 PE=1 SV=2	0	28.041	16	7	116	7	512	56.1	7.25	42.15	7	0	-1.61338	0.0238962	-0.226981	-2.03313	-2.83701	-1.63543	-1.12372	0.240836	0.0612142
Q12874	SF3A3	0.824676	0.736162	0.183585	0.232794			-0.278101	-1.60582		SAP61	Splicing factor 3A subunit 3 OS=Homo sapiens OX=9606 GN=SF3A3 PE=1 SV=1	0	28.006	12	6	83	6	501	58.8	5.38	37.41	6	0	0.51758	0.69194	0.874839	1.22353	0.742947	0.952182	-0.327904	-0.499395	-0.535992
P41743	PRKCI	0.556204	1.09111	0.0810763	0.121227			-0.846315	-2.32068		DXS1179E	Protein kinase C iota type OS=Homo sapiens OX=9606 GN=PRKCI PE=1 SV=2	0	27.963	20	7	74	7	596	68.2	5.85	28.37	7	0	-1.36442	-0.273765	-1.30787	-0.0261992	-0.0765619	-0.304354	-0.973394	-1.70165	-1.36042
Q2TAZ0	ATG2A	0.914467	0.322294	0.476109	0.593321			-0.128997	-0.785441		KIAA0404	Autophagy-related protein 2 homolog A OS=Homo sapiens OX=9606 GN=ATG2A PE=1 SV=3	0	27.958	6	8	44	8	1938	212.7	5.88	11.3	8	0	-1.32369	-1.46445	-0.986047	-1.26956	-0.983534	-1.13411	-1.10353	-1.3377	-1.07708
Q9H0G5	NSRP1	1.25145	1.89695	0.012678	0.0360829	+	C33A_C93	0.323606	4.29677		CCDC55 NSRP70	Nuclear speckle splicing regulatory protein 1 OS=Homo sapiens OX=9606 GN=NSRP1 PE=1 SV=1	0	27.909	14	7	55	7	558	66.4	8.84	17.85	7	0	-0.798236	-0.990021	-0.881439	-1.12452	-1.30077	-1.21522	-0.675087	-0.169293	-0.361122
Q01804	OTUD4	1.6514	1.45357	0.0351913	0.069244			0.723687	3.12982	+	HIN-1 KIAA1046	OTU domain-containing protein 4 OS=Homo sapiens OX=9606 GN=OTUD4 PE=1 SV=4	0	27.897	10	8	65	8	1114	124	6.71	17.16	8	0	0.0492516	0.0744197	0.259566	-1.03469	-0.429742	-0.323394	0.10911	0.347401	0.298513
O43809	NUDT21	1.14974	0.564546	0.272555	0.339144			0.201305	1.27118		CFIM25 CPSF25 CPSF5	Cleavage and polyadenylation specificity factor subunit 5 OS=Homo sapiens OX=9606 GN=NUDT21 PE=1 SV=1	0	27.894	28	5	158	5	227	26.2	8.82	65.88	5	0	1.95655	1.68062	2.1983	1.72373	1.84242	1.6654	2.04872	2.53744	1.95942
Q10469	MGAT2	0.76184	3.35015	0.000446533	0.0167579	+	C33A_C93	-0.39244	-10.6109	+		Alpha-1,6-mannosyl-glycoprotein 2-beta-N-acetylglucosaminyltransferase OS=Homo sapiens OX=9606 GN=MGAT2 PE=1 SV=1	0	27.877	19	7	108	7	447	51.5	8.76	35.3	7	0	-1.70551	-1.73944	-1.62785	-1.27207	-1.29417	-1.32924	-1.92997	-1.21573	-1.46877
O00165	HAX1	1.24184	2.11586	0.00765851	0.0305707	+	C33A_C93	0.312482	4.96871		HS1BP1	HCLS1-associated protein X-1 OS=Homo sapiens OX=9606 GN=HAX1 PE=1 SV=2	0	27.854	36	7	58	7	279	31.6	4.92	16.97	7	0	-0.546111	-0.600102	-0.735863	-0.938077	-0.892718	-0.988728	-0.941754	-1.70219	-1.18368
Q7KZI7	MARK2	1.68058	2.40852	0.00390375	0.0228534	+	C33A_C93	0.748957	5.99109	+	EMK1	Serine/threonine-protein kinase MARK2 OS=Homo sapiens OX=9606 GN=MARK2 PE=1 SV=2	0	27.834	12	8	93	6	788	87.9	9.72	38.99	8	2	1.00074	0.910482	1.15154	0.0981771	0.455807	0.261905	1.26603	0.957737	0.9878
O00154	ACOT7	0.966454	0.0577789	0.875429	0.941211			-0.049227	-0.167059		BACH	Cytosolic acyl coenzyme A thioester hydrolase OS=Homo sapiens OX=9606 GN=ACOT7 PE=1 SV=3	0	27.829	16	6	89	6	380	41.8	8.54	25.96	6	0	-1.39636	-1.14231	-1.12585	-1.67562	-1.13851	-0.702711	-1.234	-1.34386	-1.13748
O60884	DNAJA2	1.10447	0.539838	0.288511	0.35834			0.14335	1.22284		CPR3 HIRIP4	DnaJ homolog subfamily A member 2 OS=Homo sapiens OX=9606 GN=DNAJA2 PE=1 SV=1	0	27.824	21	7	200	7	412	45.7	6.48	83.38	7	0	2.23399	2.45467	2.58988	2.22195	2.2347	2.39184	2.76331	2.4985	2.5618
O15372	EIF3H	0.748995	1.60234	0.0249839	0.0557475			-0.416972	-3.49612		EIF3S3	Eukaryotic translation initiation factor 3 subunit H OS=Homo sapiens OX=9606 GN=EIF3H PE=1 SV=1	0	27.775	15	6	123	6	352	39.9	6.54	45.78	6	0	1.05887	0.843425	1.18197	1.54497	1.47142	1.31879	-0.457174	-0.792507	-0.350309
Q5RKV6	EXOSC6	1.82752	1.77127	0.0169328	0.0446337	+	C33A_C93	0.869886	3.94189	+	MTR3	Exosome complex component MTR3 OS=Homo sapiens OX=9606 GN=EXOSC6 PE=1 SV=1	0	27.767	29	6	87	6	272	28.2	6.28	35.1	6	0	0.741139	0.570516	0.768671	-0.0891761	0.138894	-0.57905	0.742989	0.0789118	0.523598
P42696	RBM34	0.721283	0.885222	0.13025	0.172189			-0.471363	-1.89992		KIAA0117	RNA-binding protein 34 OS=Homo sapiens OX=9606 GN=RBM34 PE=1 SV=2	0	27.7	22	8	65	8	430	48.5	10.11	25.25	8	0	-0.20566	0.376361	0.0290387	0.538843	0.222994	0.851992	0.118976	-0.816693	-0.628698
Q9NXH8	TOR4A	0.616959	1.5327	0.0293289	0.0660237			-0.696753	-3.32181	+	C9orf167	Torsin-4A OS=Homo sapiens OX=9606 GN=TOR4A PE=1 SV=2	0	27.699	21	7	102	7	423	46.9	9.94	45.35	7	0	0.324182	0.475014	0.481532	1.50676	1.05038	0.813846	0.321822	-0.167928	0.242742
Q14192	FHL2	0.631051	2.98469	0.00103588	0.0137516	+	C33A_C93	-0.664171	-8.53137	+	DRAL SLIM3	Four and a half LIM domains protein 2 OS=Homo sapiens OX=9606 GN=FHL2 PE=1 SV=3	0	27.689	34	8	138	8	279	32.2	7.55	55.53	8	0	0.573221	0.374414	0.505163	1.07241	1.12613	1.24677	1.19432	1.63615	1.06435
Q05519	SRSF11	1.33444	1.15422	0.0701092	0.10882			0.416236	2.45444		SFRS11	Serine/arginine-rich splicing factor 11 OS=Homo sapiens OX=9606 GN=SRSF11 PE=1 SV=1	0	27.683	14	4	120	4	484	53.5	10.52	48.17	4	0	1.51896	1.15607	1.24693	0.640635	1.07611	0.956495	1.24878	0.961668	0.530579
P42338	PIK3CB	0.677055	1.40161	0.0396632	0.0721303			-0.562656	-3.00711		PIK3C1	Phosphatidylinositol 4,5-bisphosphate 3-kinase catalytic subunit beta isoform OS=Homo sapiens OX=9606 GN=PIK3CB PE=1 SV=1	0	27.675	10	8	51	8	1070	122.7	7.09	12.47	8	0	-1.00551	-0.60624	-0.673172	-0.471488	-0.00263783	-0.122828	-0.544055	-0.444988	-0.625567
Q14689	DIP2A	0.747851	1.38516	0.0411942	0.0733553			-0.419178	-2.96878		C21orf106 DIP2 KIAA0184	Disco-interacting protein 2 homolog A OS=Homo sapiens OX=9606 GN=DIP2A PE=1 SV=2	0	27.665	7	9	53	7	1571	170.3	8.03	16.25	9	0	-2.38085	-2.10804	-2.19013	-2.03762	-1.71157	-1.67229	-3.1072	-4.45451	-3.425
Q96P70	IPO9	1.09756	0.270629	0.536254	0.665223			0.134301	0.675747		IMP9 KIAA1192 RANBP9	Importin-9 OS=Homo sapiens OX=9606 GN=IPO9 PE=1 SV=3	0	27.664	10	7	70	7	1041	115.9	4.81	24.01	7	0	1.12072	1.15254	1.07971	0.924922	1.3511	0.674033	0.471512	0.401259	0.378722
P16401	H1-5	1.37545	2.13217	0.00737612	0.0292745	+	C33A_C93	0.459899	5.02177	+	H1F5 HIST1H1B	Histone H1.5 OS=Homo sapiens OX=9606 GN=H1-5 PE=1 SV=3	0	27.661	15	5	159	5	226	22.6	10.92	68.46	5	0	3.05044	2.93234	2.9443	2.67164	2.38573	2.49001	3.01549	2.58439	2.83072
Q15554	TERF2	1.54642	2.74447	0.00180107	0.0192121	+	C33A_C93	0.628934	7.37559	+	TRBF2 TRF2	Telomeric repeat-binding factor 2 OS=Homo sapiens OX=9606 GN=TERF2 PE=1 SV=3	0	27.644	15	7	73	7	542	59.6	9.35	31.3	7	0	1.24939	1.19343	1.43335	0.752987	0.617215	0.619162	1.25164	1.21824	1.10645
Q93084	ATP2A3	0.583375	2.71119	0.00194449	0.0189573	+	C33A_C93	-0.777505	-7.22708	+		Sarcoplasmic/endoplasmic reticulum calcium ATPase 3 OS=Homo sapiens OX=9606 GN=ATP2A3 PE=1 SV=3	0	27.642	11	7	154	7	999	109.2	5.52	73.55	7	0	1.81296	1.55108	1.53437	2.29455	2.48429	2.45209	1.74928	1.66902	1.60056
Q9BVS4	RIOK2	2.73639	1.11028	0.0775745	0.116181			1.45228	2.36104		RIO2	Serine/threonine-protein kinase RIO2 OS=Homo sapiens OX=9606 GN=RIOK2 PE=1 SV=2	0	27.627	15	5	84	5	552	63.2	5.94	32.97	5	0	0.0932808	0.044788	0.157839	-1.13187	-2.51092	-0.418132	-0.241262	0.633704	0.216762
P28331	NDUFS1	1.16511	1.3283	0.0469575	0.0813361			0.22046	2.83811			NADH-ubiquinone oxidoreductase 75 kDa subunit, mitochondrial OS=Homo sapiens OX=9606 GN=NDUFS1 PE=1 SV=3	0	27.624	16	8	51	8	727	79.4	6.23	16.9	8	0	-0.698266	-0.622137	-0.658102	-0.90867	-0.738985	-0.992231	-0.661741	-0.792325	-0.822407
Q9NUP9	LIN7C	0.805967	2.89989	0.00125924	0.0145497	+	C33A_C93	-0.311207	-8.10594	+	MALS3 VELI3	Protein lin-7 homolog C OS=Homo sapiens OX=9606 GN=LIN7C PE=1 SV=1	0	27.514	38	5	82	5	197	21.8	8.43	28.63	5	0	0.355633	0.313306	0.440884	0.689628	0.688969	0.664846	0.660527	0.96977	0.46506
Q8IY37	DHX37	1.56285	1.07682	0.0837876	0.124602			0.644177	2.29075		DDX37 KIAA1517	Probable ATP-dependent RNA helicase DHX37 OS=Homo sapiens OX=9606 GN=DHX37 PE=1 SV=1	0	27.503	7	7	84	7	1157	129.5	8.1	37.55	7	0	-0.0406271	-0.0709021	-0.124	-1.14994	-0.822984	-0.195142	-0.183321	-0.505295	-0.392273
Q12768	WASHC5	1.07491	0.16815	0.678969	0.797107			0.10422	0.445557		KIAA0196	WASH complex subunit 5 OS=Homo sapiens OX=9606 GN=WASHC5 PE=1 SV=1	0	27.491	10	8	50	8	1159	134.2	6.98	15.33	8	0	-1.21184	-1.22532	-0.774335	-1.28844	-1.41553	-0.820181	-1.26073	-1.18375	-2.25302
P28838	LAP3	0.667979	1.90691	0.0123905	0.0365649	+	C33A_C93	-0.582125	-4.32582	+	LAPEP PEPS	Cytosol aminopeptidase OS=Homo sapiens OX=9606 GN=LAP3 PE=1 SV=3	0	27.408	16	7	59	7	519	56.1	7.93	17.77	7	0	-2.68195	-2.55899	-2.99016	-2.08537	-2.22488	-2.17448	-2.52977	-2.70027	-2.72378
P45880	VDAC2	0.506413	3.33536	0.000461999	0.0164124	+	C33A_C93	-0.981613	-10.5183	+		Voltage-dependent anion-selective channel protein 2 OS=Homo sapiens OX=9606 GN=VDAC2 PE=1 SV=2	0	27.341	34	7	94	7	294	31.5	7.56	34.74	7	0	0.437248	0.399548	0.622886	1.35918	1.4686	1.57675	0.665814	0.338334	0.856225
Q15366	PCBP2	1.24359	1.87325	0.0133891	0.0374872	+	C33A_C93	0.314512	4.22822			Poly(rC)-binding protein 2 OS=Homo sapiens OX=9606 GN=PCBP2 PE=1 SV=1	0	27.332	20	5	233	3	365	38.6	6.79	114.28	5	2	4.0238	4.17416	4.09125	3.72558	3.71758	3.90251	4.1004	4.01051	4.09968
Q13114	TRAF3	0.653733	0.81449	0.153289	0.196832			-0.613227	-1.7596		CAP-1 CRAF1 TRAFAMN	TNF receptor-associated factor 3 OS=Homo sapiens OX=9606 GN=TRAF3 PE=1 SV=2	0	27.32	17	8	49	8	568	64.4	7.91	14.13	8	0	-2.18022	-1.54759	-1.30917	-1.53012	-0.837731	-0.829445	-1.24921	-2.19881	-1.17387
Q8N766	EMC1	0.636548	1.29868	0.0502714	0.0837802			-0.651659	-2.77116		KIAA0090	ER membrane protein complex subunit 1 OS=Homo sapiens OX=9606 GN=EMC1 PE=1 SV=1	0	27.288	11	6	56	6	993	111.7	7.66	14.4	6	0	-2.08694	-1.38609	-2.0695	-1.28203	-1.17664	-1.12888	-2.12644	-2.05155	-0.252049
O95816	BAG2	0.698277	2.27599	0.00529674	0.0257983	+	C33A_C93	-0.518129	-5.50901	+		BAG family molecular chaperone regulator 2 OS=Homo sapiens OX=9606 GN=BAG2 PE=1 SV=1	0	27.225	37	7	224	7	211	23.8	6.7	97.31	7	0	1.77801	1.48869	1.62896	2.23575	2.11672	2.09759	1.81213	1.37979	1.75579
Q96A65	EXOC4	1.09312	0.0915466	0.809941	0.902768			0.128447	0.256883		KIAA1699 SEC8 SEC8L1	Exocyst complex component 4 OS=Homo sapiens OX=9606 GN=EXOC4 PE=1 SV=1	0	27.213	9	7	84	7	974	110.4	6.49	26.12	7	0	-2.94815	-2.25513	-1.92348	-3.2867	-2.2441	-1.9813	-2.83975	-2.63051	-2.20814
Q9UGY1	NOL12	1.21767	0.405745	0.392876	0.497612			0.284121	0.956744			Nucleolar protein 12 OS=Homo sapiens OX=9606 GN=NOL12 PE=1 SV=1	0	27.173	49	7	43	7	213	24.6	10.23	10.58	7	0	-0.764374	-1.43898	-1.74851	-1.71947	-1.57191	-1.51285	-1.56844	-1.84346	-1.63995
P82650	MRPS22	2.4351	1.15776	0.0695406	0.108021			1.28398	2.46202	+	C3orf5 RPMS22	Small ribosomal subunit protein mS22 OS=Homo sapiens OX=9606 GN=MRPS22 PE=1 SV=1	0	27.107	22	6	166	6	360	41.3	7.9	65.41	6	0	1.22466	0.59717	1.19503	-1.21118	0.382944	-0.00685267	0.987262	0.988445	1.38064
Q9Y5L0	TNPO3	0.292366	0.745379	0.17973	0.228497			-1.77415	-1.62385		IPO12	Transportin-3 OS=Homo sapiens OX=9606 GN=TNPO3 PE=1 SV=3	0	27.093	11	6	63	6	923	104.1	5.57	12.27	6	0	-5.46955	-2.0556	-2.52406	-1.12777	-1.72484	-1.87414	-2.31521	-2.06004	-1.38803
P61619	SEC61A1	1.12905	0.343894	0.453008	0.569085			0.175105	0.830386		SEC61A	Protein transport protein Sec61 subunit alpha isoform 1 OS=Homo sapiens OX=9606 GN=SEC61A1 PE=1 SV=2	0	27.012	21	8	83	7	476	52.2	8.06	32.84	8	0	0.595131	1.06824	0.770676	0.428186	0.949406	0.531137	0.756829	0.989924	0.97348
P40937	RFC5	1.12868	0.991337	0.102015	0.143811			0.174637	2.11413			Replication factor C subunit 5 OS=Homo sapiens OX=9606 GN=RFC5 PE=1 SV=1	0	27.011	27	8	97	8	340	38.5	7.2	47.48	8	0	1.13647	1.10382	0.874468	0.856828	0.874135	0.859881	0.859744	0.147264	0.757473
Q9UPP1	PHF8	2.77556	1.08226	0.0827447	0.123829			1.47278	2.30213		KIAA1111 ZNF422	Histone lysine demethylase PHF8 OS=Homo sapiens OX=9606 GN=PHF8 PE=1 SV=3	0	26.974	8	8	94	8	1060	117.8	8.72	31.33	8	0	-0.245584	-0.0250018	0.0489154	-0.802342	-2.80699	-1.03067	-0.126735	0.0298299	-0.0172996
Q8N7H5	PAF1	1.13798	0.489818	0.32373	0.403616			0.186478	1.12446		PD2	RNA polymerase II-associated factor 1 homolog OS=Homo sapiens OX=9606 GN=PAF1 PE=1 SV=2	0	26.932	12	7	100	7	531	59.9	4.63	30.2	7	0	0.0655689	0.154281	0.40628	-0.0823114	0.282027	-0.133019	0.339069	0.0369598	0.120684
O43592	XPOT	0.944605	0.0977895	0.798382	0.892036			-0.0822165	-0.272981			Exportin-T OS=Homo sapiens OX=9606 GN=XPOT PE=1 SV=2	0	26.897	11	8	68	8	962	109.9	5.39	29.59	8	0	0.0951462	-0.275539	0.00823138	-0.526772	0.380313	0.220947	-0.193066	0.0220691	-0.186232
P49959	MRE11	1.00196	0.00388551	0.991093	0.994725			0.00281955	0.0118761		HNGS1 MRE11A	Double-strand break repair protein MRE11 OS=Homo sapiens OX=9606 GN=MRE11 PE=1 SV=3	0	26.883	11	7	80	7	708	80.5	5.9	23.07	7	0	0.623245	0.880601	0.852715	0.969461	1.04002	0.338619	1.21814	0.795461	0.9646
Q16629	SRSF7	0.916053	0.514548	0.30581	0.380562			-0.126497	-1.1732		SFRS7	Serine/arginine-rich splicing factor 7 OS=Homo sapiens OX=9606 GN=SRSF7 PE=1 SV=1	0	26.855	29	7	144	7	238	27.4	11.82	76.95	7	0	3.43853	3.32814	3.56407	3.72709	3.44205	3.5411	3.33371	3.32236	3.16356
P20339	RAB5A	0.822712	1.33226	0.0465309	0.0811896			-0.281541	-2.84713		RAB5	Ras-related protein Rab-5A OS=Homo sapiens OX=9606 GN=RAB5A PE=1 SV=2	0	26.786	34	6	231	4	215	23.6	8.15	106.43	6	2	2.4692	2.19803	2.43448	2.54838	2.69928	2.69868	2.64187	2.34257	2.63372
P46777	RPL5	0.95288	0.28003	0.524772	0.652328			-0.0696337	-0.695963			Large ribosomal subunit protein uL18 OS=Homo sapiens OX=9606 GN=RPL5 PE=1 SV=3	0	26.732	21	6	255	6	297	34.3	9.72	121.04	6	0	3.86543	3.88725	3.93386	4.14113	3.95187	3.80244	3.36152	2.53079	3.24237
P49257	LMAN1	0.524847	1.78003	0.0165948	0.0438467	+	C33A_C93	-0.930032	-3.96595	+	ERGIC53 F5F8D	Protein ERGIC-53 OS=Homo sapiens OX=9606 GN=LMAN1 PE=1 SV=2	0	26.72	18	7	76	7	510	57.5	6.77	25.42	7	0	-0.290597	0.477004	-0.0014701	1.10637	1.00377	0.8649	-0.0129176	-0.593749	-0.407585
P35659	DEK	1.60304	3.0158	0.00096428	0.0146111	+	C33A_C93	0.680814	8.69245	+		Protein DEK OS=Homo sapiens OX=9606 GN=DEK PE=1 SV=1	0	26.708	22	6	102	6	375	42.6	8.56	46.2	6	0	1.46803	1.43512	1.41293	0.781335	0.877388	0.614921	1.26664	0.518095	0.929091
Q9BWE0	REPIN1	1.14105	0.137701	0.728282	0.838115			0.190366	0.372697		RIP60 ZNF464	Replication initiator 1 OS=Homo sapiens OX=9606 GN=REPIN1 PE=1 SV=1	0	26.657	15	7	76	7	567	63.5	9.98	27.28	7	0	-1.76558	-2.08506	-0.761635	-1.10912	-1.90029	-2.17396	-1.3345	-0.396837	-1.19494
P04114	APOB	1.01878	0.111489	0.77359	0.87224			0.0268478	0.307809			Apolipoprotein B-100 OS=Homo sapiens OX=9606 GN=APOB PE=1 SV=3	0	26.647	1	7	149	7	4563	515.2	7.05	83.55	7	0	2.33195	2.26788	2.3491	2.27533	2.15216	2.44089	2.35269	2.02641	2.27115
Q00577	PURA	1.08169	0.0765239	0.838448	0.920623			0.113293	0.217521		PUR1	Transcriptional activator protein Pur-alpha OS=Homo sapiens OX=9606 GN=PURA PE=1 SV=2	0	26.64	30	6	75	5	322	34.9	6.44	22.46	6	0	-1.60761	-3.14624	-2.71374	-2.4799	-2.248	-3.07957	-3.22001	-1.22902	-0.660959
P13995	MTHFD2	1.5123	1.23035	0.058837	0.0973435			0.596744	2.61939		NMDMC	Bifunctional methylenetetrahydrofolate dehydrogenase/cyclohydrolase, mitochondrial OS=Homo sapiens OX=9606 GN=MTHFD2 PE=1 SV=2	0	26.618	25	6	92	6	350	37.9	8.73	33.86	6	0	-0.608234	-0.273037	-0.041724	-0.682301	-1.2093	-0.82163	-0.145255	-2.60541	-0.400778
Q96CB9	NSUN4	0.555505	2.7417	0.00181257	0.01902	+	C33A_C93	-0.848127	-7.36315	+		5-methylcytosine rRNA methyltransferase NSUN4 OS=Homo sapiens OX=9606 GN=NSUN4 PE=1 SV=2	0	26.591	18	7	178	7	384	43.1	8.18	79.81	7	0	1.54157	1.61314	1.40669	2.46072	2.1727	2.47236	1.6568	1.108	1.37363
Q8NC67	NETO2	1.09561	0.120719	0.757322	0.857767			0.131738	0.330909		BTCL2	Neuropilin and tolloid-like protein 2 OS=Homo sapiens OX=9606 GN=NETO2 PE=1 SV=1	0	26.565	17	6	75	6	525	59.4	6.81	33.02	6	0	-0.873287	-1.22755	-0.018149	-0.677251	-0.654816	-1.18213	-1.01435	-1.57456	-0.0662289
O15427	SLC16A3	0.701146	1.68428	0.0206881	0.049896	+	C33A_C93	-0.512213	-3.70811	+	MCT3 MCT4	Monocarboxylate transporter 4 OS=Homo sapiens OX=9606 GN=SLC16A3 PE=1 SV=1	0	26.546	14	6	98	6	465	49.4	7.96	47.12	6	0	2.1923	1.94998	2.29173	2.46979	2.75992	2.74094	2.43017	2.38632	2.60479
P54619	PRKAG1	0.702296	2.79397	0.00160705	0.0181277	+	C33A_C93	-0.509849	-7.60155	+		5'-AMP-activated protein kinase subunit gamma-1 OS=Homo sapiens OX=9606 GN=PRKAG1 PE=1 SV=1	0	26.521	26	6	74	6	331	37.6	6.92	24.12	6	0	-1.86171	-1.77276	-1.97941	-1.30909	-1.36127	-1.41398	-1.6399	-1.6997	-1.73213
P00505	GOT2	1.96055	1.25555	0.0555202	0.0914071			0.97126	2.67493	+	KYAT4	Aspartate aminotransferase, mitochondrial OS=Homo sapiens OX=9606 GN=GOT2 PE=1 SV=3	0	26.518	20	7	77	7	430	47.5	9.01	32.22	7	0	0.0586185	1.24519	0.418516	-0.441061	-0.52988	-0.220513	-0.446189	-0.000514059	-0.0875416
O60493	SNX3	0.878633	1.36944	0.0427128	0.0756426			-0.186667	-2.93237			Sorting nexin-3 OS=Homo sapiens OX=9606 GN=SNX3 PE=1 SV=3	0	26.505	36	7	130	5	162	18.8	8.66	66.92	7	1	1.52183	1.38858	1.31934	1.61821	1.55092	1.62062	1.51325	0.755792	1.19915
Q96KA5	CLPTM1L	0.486148	1.00421	0.0990358	0.141335			-1.04053	-2.14047		CRR9	Lipid scramblase CLPTM1L OS=Homo sapiens OX=9606 GN=CLPTM1L PE=1 SV=1	0	26.503	14	6	123	6	538	62.2	8.56	58.63	6	0	-0.816993	-1.0404	-2.35865	-0.223956	-0.433138	-0.437353	-1.09946	-2.36872	-2.02467
P17612	PRKACA	1.02096	0.0393565	0.913363	0.961621			0.0299299	0.115839		PKACA	cAMP-dependent protein kinase catalytic subunit alpha OS=Homo sapiens OX=9606 GN=PRKACA PE=1 SV=2	0	26.497	30	8	101	8	351	40.6	8.79	40.39	8	0	1.22909	1.2747	1.19327	0.75537	1.20524	1.64667	1.23225	1.13529	1.49397
Q86X10	RALGAPB	1.13566	0.31058	0.489125	0.608196			0.183535	0.760858		KIAA1219	Ral GTPase-activating protein subunit beta OS=Homo sapiens OX=9606 GN=RALGAPB PE=1 SV=1	0	26.482	8	7	42	7	1494	166.7	6.79	10.29	7	0	-0.891726	-1.52331	-1.02077	-1.21399	-1.61713	-1.15528	-2.2984	-2.74085	-2.34401
Q9H0D6	XRN2	0.963623	0.132534	0.736998	0.845354			-0.0534588	-0.360075			5'-3' exoribonuclease 2 OS=Homo sapiens OX=9606 GN=XRN2 PE=1 SV=1	0	26.473	10	7	96	7	950	108.5	7.47	36.74	7	0	0.0359344	0.264101	0.434307	0.119312	0.341234	0.434174	0.336423	0.401449	0.116023
P08174	CD55	0.852914	0.59511	0.254033	0.315488			-0.229529	-1.33085		CR DAF	Complement decay-accelerating factor OS=Homo sapiens OX=9606 GN=CD55 PE=1 SV=4	0	26.42	25	7	94	7	381	41.4	7.59	34.13	7	0	0.0921593	0.637929	0.256449	0.526302	0.474076	0.674745	0.530155	0.0636117	0.533868
Q9BW92	TARS2	2.29213	1.48925	0.0324152	0.0668955			1.19669	3.21562	+	TARSL1	Threonine--tRNA ligase, mitochondrial OS=Homo sapiens OX=9606 GN=TARS2 PE=1 SV=1	0	26.415	11	8	117	8	718	81	7.3	36.03	8	0	-0.45518	-0.496709	-0.658501	-1.34516	-1.38836	-2.46696	-2.38862	-0.366074	-0.366844
Q07960	ARHGAP1	0.762463	1.90555	0.0124293	0.0363567	+	C33A_C93	-0.391261	-4.32184		CDC42GAP RHOGAP1	Rho GTPase-activating protein 1 OS=Homo sapiens OX=9606 GN=ARHGAP1 PE=1 SV=1	0	26.415	18	7	93	7	439	50.4	6.29	36.37	7	0	0.184343	0.44867	0.175592	0.662984	0.682017	0.637388	-0.0329466	-0.609375	-0.0280342
P46779	RPL28	1.32982	1.92002	0.0120222	0.0368915	+	C33A_C93	0.411236	4.36423	+		Large ribosomal subunit protein eL28 OS=Homo sapiens OX=9606 GN=RPL28 PE=1 SV=3	0	26.403	28	6	365	6	137	15.7	12.02	173.37	6	0	5.083	4.81679	5.01975	4.65026	4.55577	4.4798	5.37184	4.5777	5.04747
P06756	ITGAV	0.198602	1.54501	0.0285097	0.0637772			-2.33205	-3.35223	+	MSK8 VNRA VTNR	Integrin alpha-V OS=Homo sapiens OX=9606 GN=ITGAV PE=1 SV=2	0	26.385	9	8	38	8	1048	116	5.68	11.35	8	0	-2.89181	-3.91294	-1.57942	-0.189085	-0.434136	-0.764806	-2.14435	-2.96251	-1.22583
Q9NVI1	FANCI	1.96708	1.91488	0.0121653	0.0366782	+	C33A_C93	0.976055	4.34914	+	KIAA1794	Fanconi anemia group I protein OS=Homo sapiens OX=9606 GN=FANCI PE=1 SV=4	0	26.337	7	7	38	7	1328	149.2	6.74	9.79	7	0	1.06168	1.20087	0.695131	0.0626974	0.267583	-0.300761	-0.21399	-0.483339	0.0955571
Q6PJT7	ZC3H14	1.45597	0.702269	0.198487	0.249468			0.541985	1.53964			Zinc finger CCCH domain-containing protein 14 OS=Homo sapiens OX=9606 GN=ZC3H14 PE=1 SV=1	0	26.305	11	7	73	7	736	82.8	7.31	23.92	7	0	-0.811173	-0.847219	-0.626657	-1.94201	-1.21286	-0.756135	-0.0846268	0.357071	-0.056736
P47755	CAPZA2	3.48989	0.581791	0.261944	0.326887			1.80318	1.30486			F-actin-capping protein subunit alpha-2 OS=Homo sapiens OX=9606 GN=CAPZA2 PE=1 SV=3	0	26.303	28	5	145	3	286	32.9	5.85	55.89	5	0	-2.01059	-1.71656	-0.515302	-3.72236	-0.748957	-5.18068	-4.31949	-1.23124	-0.946899
Q96RE7	NACC1	1.39294	0.266248	0.541691	0.67017			0.478136	0.666282		BTBD14B NAC1	Nucleus accumbens-associated protein 1 OS=Homo sapiens OX=9606 GN=NACC1 PE=1 SV=1	0	26.287	19	7	57	7	527	57.2	5.74	18.74	7	0	-2.14349	-3.10034	-1.7308	-3.79145	-2.87322	-1.74436	-1.33717	-0.00898786	-1.1751
O95625	ZBTB11	0.855146	0.913917	0.121922	0.162451			-0.225757	-1.95737			Zinc finger and BTB domain-containing protein 11 OS=Homo sapiens OX=9606 GN=ZBTB11 PE=1 SV=2	0	26.244	8	7	69	7	1053	119.3	8.66	28.76	7	0	-0.613965	-0.831202	-1.00546	-0.630254	-0.588516	-0.55459	-0.887792	-1.5363	-1.70737
P63208	SKP1	1.24771	1.1655	0.0683129	0.106564			0.319288	2.47861		EMC19 OCP2 SKP1A TCEB1L	S-phase kinase-associated protein 1 OS=Homo sapiens OX=9606 GN=SKP1 PE=1 SV=2	0	26.162	35	8	165	8	163	18.6	4.54	83.44	8	0	2.58434	2.37771	2.51403	2.138	2.38463	1.99559	2.30685	2.17641	2.36827
P62829	RPL23	2.1013	2.72855	0.00186831	0.0196078	+	C33A_C93	1.07128	7.30421	+		Large ribosomal subunit protein uL14 OS=Homo sapiens OX=9606 GN=RPL23 PE=1 SV=1	0	26.143	52	5	278	5	140	14.9	10.51	105.96	5	0	5.05837	5.02921	4.95398	4.09139	3.65598	4.08035	5.42391	4.64192	5.01385
P56945	BCAR1	1.14785	1.31638	0.0482631	0.0823829			0.19893	2.8111		CAS CASS1 CRKAS	Breast cancer anti-estrogen resistance protein 1 OS=Homo sapiens OX=9606 GN=BCAR1 PE=1 SV=2	0	26.133	10	6	74	6	870	93.3	5.67	27.07	6	0	-0.538862	-0.399541	-0.506723	-0.679667	-0.779619	-0.582632	0.0545054	0.418598	0.0413782
O95232	LUC7L3	1.78894	0.373392	0.423261	0.532725			0.839109	0.891041		CREAP1 CROP O48	Luc7-like protein 3 OS=Homo sapiens OX=9606 GN=LUC7L3 PE=1 SV=2	0	26.126	20	7	68	7	432	51.4	9.79	26.17	7	0	-1.11352	-0.490501	-0.99746	-0.888232	-3.54666	-0.683911	-0.0988495	-0.759714	-1.41567
P24539	ATP5PB	1.37051	0.953936	0.11119	0.152096			0.454712	2.03805		ATP5F1	ATP synthase F(0) complex subunit B1, mitochondrial OS=Homo sapiens OX=9606 GN=ATP5PB PE=1 SV=2	0	26.105	19	5	99	5	256	28.9	9.36	44.92	5	0	0.516651	0.848682	0.7611	0.510326	-0.139504	0.391475	0.849727	0.267479	0.502576
Q8IVS2	MCAT	1.24137	0.287227	0.516147	0.642895			0.31193	0.711359		MT	Malonyl-CoA-acyl carrier protein transacylase, mitochondrial OS=Homo sapiens OX=9606 GN=MCAT PE=1 SV=2	0	26.085	23	6	90	6	390	42.9	8.72	30.32	6	0	0.253693	-0.714545	0.316874	-0.40819	-0.826584	0.155006	-1.05996	-1.06773	-0.615883
Q9NRZ9	HELLS	1.33957	2.06927	0.00852574	0.0318182	+	C33A_C93	0.421775	4.81956	+	PASG SMARCA6	Lymphoid-specific helicase OS=Homo sapiens OX=9606 GN=HELLS PE=1 SV=1	0	26.081	7	7	126	7	838	97	7.93	54.08	7	0	1.23766	1.30208	1.17801	0.96365	0.688712	0.800059	1.29381	0.95438	1.25663
Q02809	PLOD1	0.792815	0.536328	0.290852	0.360359			-0.334944	-1.21596		LLH PLOD	Procollagen-lysine,2-oxoglutarate 5-dioxygenase 1 OS=Homo sapiens OX=9606 GN=PLOD1 PE=1 SV=2	0	26.04	13	8	67	8	727	83.5	6.95	23.8	8	0	-0.332588	-0.566127	-0.261307	-0.558633	0.299159	0.104286	-0.269237	-0.105369	-0.311077
Q12933	TRAF2	0.719855	1.04029	0.0911393	0.131346			-0.474222	-2.21479		TRAP3	TNF receptor-associated factor 2 OS=Homo sapiens OX=9606 GN=TRAF2 PE=1 SV=2	0	26.037	14	6	101	6	501	55.8	7.53	31.85	6	0	-0.612956	-1.05099	-1.34507	-0.541873	-0.481222	-0.563264	-1.11964	-3.92389	-0.492945
Q9NZT2	OGFR	0.671739	2.465	0.00342767	0.0231158	+	C33A_C93	-0.574028	-6.20691	+		Opioid growth factor receptor OS=Homo sapiens OX=9606 GN=OGFR PE=1 SV=3	0	26.025	13	7	57	7	677	73.3	4.84	21.73	7	0	-0.0347867	0.194765	0.163379	0.774898	0.574701	0.695841	0.46834	1.06417	-0.285753
Q06265	EXOSC9	1.27906	1.69804	0.0200428	0.0496728	+	C33A_C93	0.355083	3.74448		PMSCL1	Exosome complex component RRP45 OS=Homo sapiens OX=9606 GN=EXOSC9 PE=1 SV=3	0	26.019	21	6	79	6	439	48.9	5.29	27.24	6	0	-0.0994938	-0.162147	-0.0235552	-0.444313	-0.304288	-0.601845	-0.0332462	-0.427334	-0.213692
Q92688	ANP32B	0.488385	0.676368	0.210684	0.266014			-1.03391	-1.48915		APRIL PHAPI2	Acidic leucine-rich nuclear phosphoprotein 32 family member B OS=Homo sapiens OX=9606 GN=ANP32B PE=1 SV=1	0	25.981	25	5	131	5	251	28.8	4.06	59.23	5	0	1.26503	1.62066	3.48083	3.34863	3.01229	3.10734	3.29463	4.13081	3.52056
P55084	HADHB	1.36787	0.947753	0.112784	0.152471			0.451928	2.02554			Trifunctional enzyme subunit beta, mitochondrial OS=Homo sapiens OX=9606 GN=HADHB PE=1 SV=3	0	25.938	19	7	69	7	474	51.3	9.41	33.76	7	0	-0.176938	-0.198494	0.222646	-0.818016	-0.481649	-0.208903	0.211611	-0.0945379	-0.455416
Q96C36	PYCR2	0.882967	0.575795	0.265586	0.33213			-0.179568	-1.29316			Pyrroline-5-carboxylate reductase 2 OS=Homo sapiens OX=9606 GN=PYCR2 PE=1 SV=1	0	25.922	21	6	146	5	320	33.6	7.77	47.63	6	1	1.52545	1.49233	1.89088	1.91362	1.80876	1.72499	1.68866	1.4034	2.03473
Q86UK7	ZNF598	1.91056	1.07973	0.0832273	0.123925			0.933998	2.29685			E3 ubiquitin-protein ligase ZNF598 OS=Homo sapiens OX=9606 GN=ZNF598 PE=1 SV=1	0	25.905	9	8	69	8	904	98.6	8.4	23.95	8	0	-0.652435	-0.56075	-0.480297	-2.22555	-1.43861	-0.831317	-1.33815	-1.29447	-0.533876
Q969S3	ZNF622	1.32986	1.80661	0.0156097	0.0421502	+	C33A_C93	0.411273	4.03956		ZPR9	Cytoplasmic 60S subunit biogenesis factor ZNF622 OS=Homo sapiens OX=9606 GN=ZNF622 PE=1 SV=1	0	25.895	16	6	80	6	477	54.2	6.15	39.24	6	0	1.1537	1.06651	1.10308	0.649347	0.88593	0.554189	0.85261	0.978673	0.882345
Q9Y5A9	YTHDF2	2.07247	3.39067	0.000406752	0.0167727	+	C33A_C93	1.05135	10.8686	+	HGRG8	YTH domain-containing family protein 2 OS=Homo sapiens OX=9606 GN=YTHDF2 PE=1 SV=2	0	25.877	13	6	74	5	579	62.3	8.79	35.07	6	1	1.05512	1.14493	1.30665	0.212737	-0.000957999	0.140869	1.10224	1.2375	1.18326
Q15758	SLC1A5	0.649599	1.6019	0.0250094	0.0556695			-0.622379	-3.49499	+	ASCT2 M7V1 RDR RDRC	Neutral amino acid transporter B(0) OS=Homo sapiens OX=9606 GN=SLC1A5 PE=1 SV=2	0	25.852	12	6	157	6	541	56.6	5.48	91.81	6	0	1.82377	1.74467	2.2534	2.4151	2.69849	2.5754	1.92077	2.13377	1.99766
Q9BSF8	BTBD10	1.53224	2.41933	0.0038078	0.0231551	+	C33A_C93	0.615639	6.03189	+	GMRP1	BTB/POZ domain-containing protein 10 OS=Homo sapiens OX=9606 GN=BTBD10 PE=1 SV=2	0	25.842	15	6	76	6	475	53.7	7.77	24.3	6	0	-0.321428	-0.400255	-0.127486	-0.774624	-0.961677	-0.959784	-6.39352	-2.96283	-6.37083
P51148	RAB5C	0.858141	1.79769	0.0159336	0.0426328	+	C33A_C93	-0.220714	-4.01476		RABL	Ras-related protein Rab-5C OS=Homo sapiens OX=9606 GN=RAB5C PE=1 SV=2	0	25.806	29	5	167	3	216	23.5	8.41	86.25	5	0	0.78052	0.634416	0.609173	0.92142	0.880795	0.884034	0.589976	0.20805	0.620012
P43353	ALDH3B1	0.65153	1.5099	0.0309097	0.0662653			-0.618098	-3.26585	+	ALDH7	Aldehyde dehydrogenase family 3 member B1 OS=Homo sapiens OX=9606 GN=ALDH3B1 PE=1 SV=1	0	25.736	15	6	92	5	468	51.8	7.62	30.85	6	0	-0.595245	-0.561694	-1.02824	-0.0586428	0.0581601	-0.330404	-0.558207	-0.939984	-0.904032
P23919	DTYMK	1.38078	0.286685	0.516791	0.643805			0.465485	0.710202		CDC8 TMPK TYMK	Thymidylate kinase OS=Homo sapiens OX=9606 GN=DTYMK PE=1 SV=4	0	25.728	32	7	94	7	212	23.8	8.27	31.7	7	0	-0.189176	-0.399825	-0.540187	-0.236949	-0.152844	-2.13585	-0.371854	-0.752928	-0.241446
Q6DN90	IQSEC1	1.24023	0.744646	0.180034	0.228656			0.310611	1.62242		ARFGEP100 BRAG2 KIAA0763	IQ motif and SEC7 domain-containing protein 1 OS=Homo sapiens OX=9606 GN=IQSEC1 PE=1 SV=1	0	25.728	11	8	61	6	963	108.2	6.93	20.64	8	2	-0.516066	-0.613818	-1.08899	-1.1964	-0.978816	-0.975492	-0.552479	-1.08801	-0.845293
P11310	ACADM	0.728704	2.43595	0.00366482	0.0229424	+	C33A_C93	-0.456596	-6.09509	+		Medium-chain specific acyl-CoA dehydrogenase, mitochondrial OS=Homo sapiens OX=9606 GN=ACADM PE=1 SV=1	0	25.682	14	5	114	5	421	46.6	8.37	51.18	5	0	0.748692	0.865264	0.905856	1.18281	1.33151	1.37529	0.654712	1.03314	0.89906
Q06830	PRDX1	0.615043	0.475273	0.334755	0.418528			-0.70124	-1.0957		PAGA PAGB TDPX2	Peroxiredoxin-1 OS=Homo sapiens OX=9606 GN=PRDX1 PE=1 SV=1	0	25.668	43	6	86	4	199	22.1	8.13	33.89	6	1	0.264715	2.11459	2.15817	1.93663	2.29751	2.40706	2.33791	2.05115	2.23597
Q9Y5Q9	GTF3C3	1.31509	0.261725	0.547363	0.675786			0.395163	0.656481			General transcription factor 3C polypeptide 3 OS=Homo sapiens OX=9606 GN=GTF3C3 PE=1 SV=1	0	25.661	11	8	55	8	886	101.2	5.07	14.57	8	0	-2.32153	-0.997472	-1.09943	-2.21157	-2.37117	-1.02118	-0.979009	-1.12647	-1.00753
O60784	TOM1	1.02442	0.136215	0.730777	0.840001			0.0348071	0.369077			Target of Myb1 membrane trafficking protein OS=Homo sapiens OX=9606 GN=TOM1 PE=1 SV=2	0	25.637	19	6	100	6	492	53.8	4.7	49.54	6	0	1.19151	0.939959	1.02068	0.900259	1.08616	1.06131	0.796416	0.283668	0.89139
Q9Y6G9	DYNC1LI1	0.90217	0.370026	0.426554	0.537006			-0.148528	-0.884158		DNCLI1	Cytoplasmic dynein 1 light intermediate chain 1 OS=Homo sapiens OX=9606 GN=DYNC1LI1 PE=1 SV=3	0	25.611	20	7	76	6	523	56.5	6.42	23.81	7	1	-0.57431	-0.386377	-0.373242	-0.504659	0.00662463	-0.39031	-0.351452	-0.666522	-0.343986
P49585	PCYT1A	0.993847	0.028789	0.93586	0.973272			-0.00890468	-0.0856504		CTPCT PCYT1	Choline-phosphate cytidylyltransferase A OS=Homo sapiens OX=9606 GN=PCYT1A PE=1 SV=2	0	25.596	25	7	56	7	367	41.7	7.25	21.76	7	0	-0.52	-0.589176	-0.264073	-0.493439	-0.386477	-0.466619	-0.425515	-0.520126	-0.352022
O75874	IDH1	0.682314	0.542405	0.28681	0.356554			-0.551492	-1.22787		PICD	Isocitrate dehydrogenase [NADP] cytoplasmic OS=Homo sapiens OX=9606 GN=IDH1 PE=1 SV=2	0	25.588	20	7	100	6	414	46.6	7.01	42.26	7	0	-1.48043	0.000297996	-0.436492	-0.22671	-0.126266	0.0908287	-0.260317	-0.452854	-0.24333
Q92995	USP13	0.49013	0.344935	0.451923	0.569322			-1.02876	-0.832541		ISOT3	Ubiquitin carboxyl-terminal hydrolase 13 OS=Homo sapiens OX=9606 GN=USP13 PE=1 SV=2	0	25.576	12	6	58	6	863	97.3	5.53	18.47	6	0	-2.45397	-2.19269	-5.99368	-2.30718	-2.42369	-2.82318	-1.76774	-0.984096	-1.62539
Q99829	CPNE1	1.60695	1.57156	0.0268191	0.0618993			0.684323	3.41842	+	CPN1	Copine-1 OS=Homo sapiens OX=9606 GN=CPNE1 PE=1 SV=1	0	25.574	16	6	62	6	537	59	5.83	28.03	6	0	1.26001	1.22418	0.7193	0.385896	0.212627	0.552001	-0.0559186	-1.67525	0.364046
Q9BT22	ALG1	0.853958	0.98229	0.104162	0.145469			-0.227763	-2.09566		HMAT1 HMT1	Chitobiosyldiphosphodolichol beta-mannosyltransferase OS=Homo sapiens OX=9606 GN=ALG1 PE=1 SV=2	0	25.573	17	6	109	6	464	52.5	7.23	37.87	6	0	-0.386919	-0.391481	-0.545285	-0.0332223	-0.357848	-0.249326	-0.340221	-0.634969	-0.329632
Q14498	RBM39	0.958217	0.150144	0.707711	0.819277			-0.061576	-0.402777		HCC1 RNPC2	RNA-binding protein 39 OS=Homo sapiens OX=9606 GN=RBM39 PE=1 SV=2	0	25.541	14	6	118	6	530	59.3	10.1	46.2	6	0	2.17978	1.82635	1.83193	1.98728	2.1875	1.848	1.27164	1.46637	1.40283
Q6P474	PDXDC2P	0.755664	1.79255	0.0161233	0.0432917	+	C33A_C93	-0.404183	-4.00051		PDXDC2	Putative pyridoxal-dependent decarboxylase domain-containing protein 2 OS=Homo sapiens OX=9606 GN=PDXDC2P PE=5 SV=3	0	25.54	17	6	97	6	469	51.8	5.96	39.66	6	0	0.142294	0.280699	0.187807	0.67306	0.72498	0.425307	0.227143	-0.0272143	0.249925
P20700	LMNB1	1.23407	0.466249	0.341783	0.426805			0.303424	1.0778		LMN2 LMNB	Lamin-B1 OS=Homo sapiens OX=9606 GN=LMNB1 PE=1 SV=2	0	25.533	15	8	93	7	586	66.4	5.16	39.93	8	0	-2.33612	-1.91918	-2.65986	-2.24403	-2.77426	-2.80715	-2.32429	-2.03711	-2.56641
Q9Y2R9	MRPS7	1.04316	0.24176	0.573112	0.702085			0.0609548	0.612839			Small ribosomal subunit protein uS7m OS=Homo sapiens OX=9606 GN=MRPS7 PE=1 SV=2	0	25.518	26	6	128	6	242	28.1	9.99	56.2	6	0	1.63335	1.41928	1.62474	1.5876	1.35861	1.54829	1.9531	1.80337	1.53456
Q9Y3U8	RPL36	1.18809	1.91337	0.0122075	0.0366077	+	C33A_C93	0.248641	4.34473			Large ribosomal subunit protein eL36 OS=Homo sapiens OX=9606 GN=RPL36 PE=1 SV=3	0	25.463	37	5	154	5	105	12.2	11.59	54.93	5	0	4.02384	3.94875	3.83076	3.66435	3.69909	3.69397	4.01364	3.36079	3.76531
Q969X6	UTP4	1.31242	1.36455	0.0431966	0.0766709			0.392229	2.92109		CIRH1A cPERP-E KIAA1988	U3 small nucleolar RNA-associated protein 4 homolog OS=Homo sapiens OX=9606 GN=UTP4 PE=1 SV=1	0	25.444	13	6	74	6	686	76.8	8.85	28.83	6	0	0.382839	0.240686	0.0989808	-0.264417	-0.250975	0.0612102	0.0354853	-0.0127534	0.0291653
Q9NUQ3	TXLNG	1.27373	1.19901	0.0632404	0.101158			0.349058	2.55097		CXorf15 ELRG LSR5	Gamma-taxilin OS=Homo sapiens OX=9606 GN=TXLNG PE=1 SV=2	0	25.443	19	8	75	7	528	60.5	7.52	27.13	8	1	0.504658	0.625666	0.885092	0.355502	0.438983	0.173757	0.819511	0.0242312	0.499047
Q9HCK8	CHD8	2.02139	0.776462	0.167316	0.213112			1.01535	1.68477		HELSNF1 KIAA1564	Chromodomain-helicase-DNA-binding protein 8 OS=Homo sapiens OX=9606 GN=CHD8 PE=1 SV=5	0	25.403	3	8	37	7	2581	290.3	6.47	11.09	8	0	-2.27484	-1.56413	-1.13947	-3.58235	-2.59898	-1.84315	-1.23082	-0.787419	-1.01932
O96019	ACTL6A	2.00805	1.14235	0.0720522	0.109983			1.00579	2.42908		BAF53 BAF53A INO80K	Actin-like protein 6A OS=Homo sapiens OX=9606 GN=ACTL6A PE=1 SV=1	0	25.395	21	6	91	3	429	47.4	5.6	33.92	6	2	1.04452	0.821055	0.873165	0.216665	0.407188	-0.902485	1.06405	0.693367	0.910481
Q8IZP0	ABI1	1.0712	0.116531	0.764661	0.864725			0.0992227	0.320461		SSH3BP1	Abl interactor 1 OS=Homo sapiens OX=9606 GN=ABI1 PE=1 SV=4	0	25.391	13	6	72	6	508	55	7.06	24.47	6	0	-0.175605	0.274993	0.556416	0.533545	-0.238048	0.0626394	0.139347	0.260985	0.20877
P42766	RPL35	1.22439	1.16148	0.0689477	0.106712			0.292062	2.46999			Large ribosomal subunit protein uL29 OS=Homo sapiens OX=9606 GN=RPL35 PE=1 SV=2	0	25.37	28	5	313	5	123	14.5	11.05	179.78	5	0	5.98682	5.73301	5.79624	5.43175	5.48328	5.72486	6.05393	5.47155	5.89267
P27105	STOM	0.255609	3.95659	0.000110513	0.00845714	+	C33A_C93	-1.96799	-15.1551	+	BND7 EPB72	Stomatin OS=Homo sapiens OX=9606 GN=STOM PE=1 SV=3	0	25.365	20	5	34	5	288	31.7	7.88	15.56	5	0	-1.26834	-1.60791	-1.18387	0.612973	0.600935	0.629944	-1.12377	-1.13285	-1.20302
Q9NRA8	EIF4ENIF1	1.72517	2.09977	0.00794754	0.0313129	+	C33A_C93	0.786738	4.91681	+		Eukaryotic translation initiation factor 4E transporter OS=Homo sapiens OX=9606 GN=EIF4ENIF1 PE=1 SV=2	0	25.365	10	7	26	7	985	108.1	8.32	11.74	7	0	-2.53719	-2.76313	-2.34117	-3.28775	-3.53197	-3.18198	-2.18266	-2.29589	-2.74121
Q8NEM2	SHCBP1	1.20242	0.84912	0.14154	0.18417			0.265945	1.82809			SHC SH2 domain-binding protein 1 OS=Homo sapiens OX=9606 GN=SHCBP1 PE=1 SV=3	0	25.303	12	8	44	8	672	75.6	4.75	14.23	8	0	-0.246986	-0.212027	0.0424733	-0.300268	-0.28289	-0.631219	0.255873	-0.171501	-0.237782
P29692	EEF1D	1.0116	0.0289498	0.935514	0.973591			0.016645	0.0861145		EF1D	Elongation factor 1-delta OS=Homo sapiens OX=9606 GN=EEF1D PE=1 SV=5	0	25.255	22	7	248	5	281	31.1	5.01	129.4	7	2	3.57912	3.29278	3.56667	3.67521	3.58492	3.12852	4.18574	4.24847	3.96111
Q8TEU7	RAPGEF6	1.15423	0.171306	0.674053	0.79472			0.206925	0.452971		PDZGEF2	Rap guanine nucleotide exchange factor 6 OS=Homo sapiens OX=9606 GN=RAPGEF6 PE=1 SV=2	0	25.246	6	8	41	7	1601	179.3	6.4	8.81	8	0	-2.93641	-1.8202	-1.46364	-2.1505	-2.49708	-2.19343	-1.46768	-1.93348	-2.53963
P09497	CLTB	0.892193	0.456808	0.349295	0.43874			-0.164573	-1.05904			Clathrin light chain B OS=Homo sapiens OX=9606 GN=CLTB PE=1 SV=1	0	25.236	18	6	114	6	229	25.2	4.64	50.55	6	0	1.9774	1.65725	1.62651	2.12607	1.86244	1.76636	1.4902	0.837666	1.64607
Q9NP58	ABCB6	0.864033	1.04999	0.0891263	0.129765			-0.210842	-2.23488		MTABC3 PRP UMAT	ATP-binding cassette sub-family B member 6 OS=Homo sapiens OX=9606 GN=ABCB6 PE=1 SV=1	0	25.222	9	6	70	6	842	93.8	8.48	26.03	6	0	-0.622289	-0.714421	-0.823445	-0.360613	-0.584046	-0.582971	-0.649592	-0.669254	-0.531767
Q5SSJ5	HP1BP3	0.849757	1.39131	0.0406149	0.0729547			-0.234878	-2.98308			Heterochromatin protein 1-binding protein 3 OS=Homo sapiens OX=9606 GN=HP1BP3 PE=1 SV=1	0	25.176	13	7	81	7	553	61.2	9.67	39.47	7	0	2.02441	1.92516	2.11248	2.36911	2.1867	2.21088	2.4064	1.95773	2.22556
P25398	RPS12	1.62239	1.77959	0.0166114	0.0437737	+	C33A_C93	0.698122	3.96475	+		Small ribosomal subunit protein eS12 OS=Homo sapiens OX=9606 GN=RPS12 PE=1 SV=3	0	25.151	25	5	231	5	132	14.5	7.21	107.78	5	0	4.49514	4.58299	4.5032	3.75786	3.56982	4.15927	3.90434	3.57216	3.76055
Q92615	LARP4B	2.37104	3.4671	0.000341114	0.0164615	+	C33A_C93	1.24552	11.3709	+	KIAA0217 LARP5	La-related protein 4B OS=Homo sapiens OX=9606 GN=LARP4B PE=1 SV=3	0	25.15	9	7	78	7	738	80.5	6.92	23.88	7	0	0.103352	-0.108762	0.177495	-1.28523	-1.05683	-1.22242	-0.0961108	-0.281801	-0.0206642
P20908	COL5A1	0.232276	1.06192	0.0867129	0.127197			-2.10609	-2.25966			Collagen alpha-1(V) chain OS=Homo sapiens OX=9606 GN=COL5A1 PE=1 SV=3	0	25.133	6	7	32	7	1838	183.4	5.06	9.33	7	0	-4.91659	-1.88382	-3.24389	-0.986059	-0.870602	-1.86938	-3.8962	-3.01719	-1.42847
P51617	IRAK1	1.27393	0.20633	0.621827	0.749711			0.349289	0.533701		IRAK	Interleukin-1 receptor-associated kinase 1 OS=Homo sapiens OX=9606 GN=IRAK1 PE=1 SV=2	0	25.123	13	6	81	6	712	76.5	6.62	29.96	6	0	-0.54389	-0.0894522	-1.06841	-0.550387	-0.127802	-2.07143	-0.904322	-1.59231	-4.67156
Q8WYP5	AHCTF1	2.43583	0.939037	0.11507	0.154752			1.28441	2.00793		ELYS TMBS62	Protein ELYS OS=Homo sapiens OX=9606 GN=AHCTF1 PE=1 SV=3	0	25.119	4	8	31	8	2266	252.3	6.6	7.69	8	0	-1.93889	-1.91372	-2.05775	-4.53064	-2.63309	-2.59987	-2.03844	-4.96641	-1.90894
Q01081	U2AF1	1.38127	1.6308	0.0233989	0.0526887			0.465997	3.56889		U2AF35 U2AFBP	Splicing factor U2AF 35 kDa subunit OS=Homo sapiens OX=9606 GN=U2AF1 PE=1 SV=3	0	25.118	33	6	131	6	240	27.9	8.81	67.74	6	0	3.3758	3.33176	3.49233	3.17539	2.83673	2.78979	3.31337	3.04283	2.9925
Q9NR12	PDLIM7	0.951956	0.362407	0.434103	0.54894			-0.0710331	-0.868544		ENIGMA	PDZ and LIM domain protein 7 OS=Homo sapiens OX=9606 GN=PDLIM7 PE=1 SV=1	0	25.11	18	7	80	7	457	49.8	8.41	31.02	7	0	-0.18303	0.0701572	-0.0844242	0.0553818	0.0237448	-0.0633244	-0.227238	-0.0894336	-0.00210762
P84095	RHOG	0.907701	0.227921	0.59167	0.719246			-0.139711	-0.5822		ARHG	Rho-related GTP-binding protein RhoG OS=Homo sapiens OX=9606 GN=RHOG PE=1 SV=1	0	25.07	30	5	126	5	191	21.3	8.12	49.04	5	0	1.24885	1.35702	0.802357	1.61499	1.10953	1.10284	1.08748	0.847961	1.08471
P00568	AK1	1.29618	0.623039	0.23821	0.294882			0.374265	1.38528			Adenylate kinase isoenzyme 1 OS=Homo sapiens OX=9606 GN=AK1 PE=1 SV=3	0	25.034	48	8	99	8	194	21.6	8.63	29.96	8	0	-1.53749	-0.855214	-0.715827	-1.39798	-1.57642	-1.25693	-0.947671	-0.637274	-0.669003
P29992	GNA11	0.905761	0.509669	0.309265	0.383737			-0.142797	-1.1636		GA11	Guanine nucleotide-binding protein subunit alpha-11 OS=Homo sapiens OX=9606 GN=GNA11 PE=1 SV=2	0	25.031	20	7	110	5	359	42.1	5.69	51.67	7	2	0.698736	0.79071	0.712869	0.758842	0.756282	1.11558	0.875423	0.441631	0.667403
Q15020	SART3	0.820995	0.515137	0.305396	0.379994			-0.284555	-1.17435		KIAA0156 TIP110	Squamous cell carcinoma antigen recognized by T-cells 3 OS=Homo sapiens OX=9606 GN=SART3 PE=1 SV=1	0	24.987	9	7	103	7	963	109.9	5.57	36.35	7	0	1.32538	1.47356	0.717314	1.35091	1.42493	1.59408	1.08099	0.655218	0.976456
O75477	ERLIN1	0.102973	0.961827	0.109188	0.150923			-3.27966	-2.05405		C10orf69 KE04 KEO4 SPFH1	Erlin-1 OS=Homo sapiens OX=9606 GN=ERLIN1 PE=1 SV=2	0	24.976	21	7	95	4	348	39.1	7.87	45.36	7	0	-1.95467	-6.52846	-5.94246	-0.136563	-2.2188	-2.23125	-3.18246	-6.44029	-6.26656
Q8TC12	RDH11	0.789126	1.57911	0.0263568	0.0615137			-0.341672	-3.43738		ARSDR1 PSDR1 SDR7C1	Retinol dehydrogenase 11 OS=Homo sapiens OX=9606 GN=RDH11 PE=1 SV=2	0	24.967	23	6	81	6	318	35.4	8.82	39	6	0	1.39768	1.53396	1.24181	1.63492	1.74888	1.81467	1.30134	1.01661	1.26181
Q13765	NACA	1.89867	3.41387	0.00038559	0.0151059	+	C33A_C93	0.92499	11.0189	+		Nascent polypeptide-associated complex subunit alpha OS=Homo sapiens OX=9606 GN=NACA PE=1 SV=1	0	24.951	20	4	112	3	215	23.4	4.56	60.49	4	0	3.14202	3.29603	3.33845	2.21578	2.39477	2.39099	3.08965	2.18703	2.86631
E9PAV3	NACA	1.89867	3.41387	0.00038559	0.0149302	+	C33A_C93	0.92499	11.0189	+		Nascent polypeptide-associated complex subunit alpha, muscle-specific form OS=Homo sapiens OX=9606 GN=NACA PE=1 SV=1	0	24.951	2	4	112	3	2078	205.3	9.58	60.49	4	1	3.14202	3.29603	3.33845	2.21578	2.39477	2.39099	3.08965	2.18703	2.86631
P78318	IGBP1	1.48671	0.853116	0.140244	0.182771			0.572127	1.83602		IBP1	Immunoglobulin-binding protein 1 OS=Homo sapiens OX=9606 GN=IGBP1 PE=1 SV=1	0	24.946	22	6	61	6	339	39.2	5.38	20.38	6	0	-1.04179	-1.17749	-1.05089	-1.3822	-1.32599	-2.27837	-0.484086	0.286846	-0.420281
P20020	ATP2B1	1.26632	0.339786	0.457314	0.57341			0.340646	0.821874		PMCA1	Plasma membrane calcium-transporting ATPase 1 OS=Homo sapiens OX=9606 GN=ATP2B1 PE=1 SV=4	0	24.917	6	8	98	2	1220	134.6	5.91	38.04	8	1	-1.37812	-0.140354	-0.923119	-1.37764	-0.74959	-1.3363	-1.24961	-5.95519	-1.8663
Q9NYU2	UGGT1	0.862098	0.126079	0.748034	0.852069			-0.214076	-0.344194		GT UGCGL1 UGGT UGT1 UGTR	UDP-glucose:glycoprotein glucosyltransferase 1 OS=Homo sapiens OX=9606 GN=UGGT1 PE=1 SV=3	0	24.916	7	7	44	7	1555	177.1	5.63	8.4	7	0	-1.69465	-0.656009	-1.97893	-0.885833	-2.16704	-0.634492	-5.41331	-2.37845	-4.14323
P54760	EPHB4	0.867243	0.262864	0.545929	0.674521			-0.205492	-0.658952		HTK MYK1 TYRO11	Ephrin type-B receptor 4 OS=Homo sapiens OX=9606 GN=EPHB4 PE=1 SV=2	0	24.903	10	8	79	7	987	108.2	6.9	41.2	8	0	-1.15723	-1.30165	-0.48382	-1.13733	-0.539934	-0.648957	-0.796356	-1.67455	-0.97928
Q5TA45	INTS11	1.45212	0.605442	0.248061	0.307026			0.538164	1.35099		CPSF3L RC68	Integrator complex subunit 11 OS=Homo sapiens OX=9606 GN=INTS11 PE=1 SV=2	0	24.895	11	6	72	6	600	67.6	8.06	23.56	6	0	0.295143	0.267487	0.29043	-1.02625	0.300721	-0.0359044	0.438168	0.156763	0.274875
P61764	STXBP1	0.733087	3.71675	0.000191976	0.0103333	+	C33A_C93	-0.447943	-13.1704	+	UNC18A	Syntaxin-binding protein 1 OS=Homo sapiens OX=9606 GN=STXBP1 PE=1 SV=1	0	24.865	12	7	72	7	594	67.5	6.96	35.89	7	0	0.26181	0.1679	0.246595	0.672528	0.643321	0.704286	0.464365	0.111371	0.376219
A1L0T0	ILVBL	3.67844	0.552543	0.280193	0.34749			1.87909	1.24771		AHAS HACL2	2-hydroxyacyl-CoA lyase 2 OS=Homo sapiens OX=9606 GN=ILVBL PE=1 SV=2	0	24.842	17	6	62	6	632	67.8	8.15	16.31	6	0	0.0455589	0.312333	0.0745231	-0.0742596	-4.7366	-0.394007	-0.0738488	-0.546223	0.204128
P34896	SHMT1	0.849226	0.305051	0.495392	0.61586			-0.23578	-0.749198			Serine hydroxymethyltransferase, cytosolic OS=Homo sapiens OX=9606 GN=SHMT1 PE=1 SV=1	0	24.828	17	7	50	7	483	53	7.71	20.08	7	0	-1.79709	-1.11406	-1.01635	-1.3941	-0.715437	-1.11061	-0.862945	-1.79296	-1.96477
O75822	EIF3J	0.759678	0.744098	0.180261	0.228807			-0.396541	-1.62135		EIF3S1	Eukaryotic translation initiation factor 3 subunit J OS=Homo sapiens OX=9606 GN=EIF3J PE=1 SV=2	0	24.825	21	7	78	7	258	29	4.83	36.49	7	0	1.90692	1.47684	2.29411	2.34422	2.36185	2.16141	1.06855	1.7884	1.05592
Q96TA1	NIBAN2	0.618848	0.158494	0.694235	0.807059			-0.692343	-0.422719		C9orf88 FAM129B	Protein Niban 2 OS=Homo sapiens OX=9606 GN=NIBAN2 PE=1 SV=3	0	24.801	12	7	46	7	746	84.1	6.19	13.81	7	0	-5.0094	-0.391912	-3.01705	-4.00545	-1.16657	-1.16932	-1.11444	-3.11943	-0.97687
Q96QR8	PURB	0.953076	0.0681384	0.854794	0.929854			-0.0693375	-0.19514			Transcriptional activator protein Pur-beta OS=Homo sapiens OX=9606 GN=PURB PE=1 SV=3	0	24.796	26	7	71	6	312	33.2	5.43	26.23	7	0	-0.477871	-1.3026	-0.83653	-0.37792	-0.746761	-1.2843	-0.619973	-1.07088	-0.868191
P00450	CP	1.09969	0.101832	0.790984	0.886163			0.137091	0.283328			Ceruloplasmin OS=Homo sapiens OX=9606 GN=CP PE=1 SV=2	0	24.784	7	6	44	6	1065	122.1	5.72	13.82	6	0	-3.41794	-3.61644	-3.11802	-4.43565	-3.17482	-2.9532	-2.09477	-1.29357	-2.14236
Q5F1R6	DNAJC21	4.22276	0.820299	0.151252	0.194747			2.07819	1.77106		DNAJA5	DnaJ homolog subfamily C member 21 OS=Homo sapiens OX=9606 GN=DNAJC21 PE=1 SV=2	0	24.76	15	6	29	6	531	62	5.47	11.31	6	0	-0.91737	-1.03444	-0.654589	-5.276	-1.62553	-1.93944	-0.674079	0.0435186	-0.435099
Q9Y512	SAMM50	0.64164	1.38568	0.0411451	0.0735165			-0.640164	-2.96998		SAM50	Sorting and assembly machinery component 50 homolog OS=Homo sapiens OX=9606 GN=SAMM50 PE=1 SV=3	0	24.753	18	6	89	6	469	51.9	6.9	41.16	6	0	1.18067	0.603511	0.656986	1.37206	1.3141	1.6755	0.982067	0.0984746	-1.60993
Q04206	RELA	0.999729	0.000629372	0.998552	0.999313			-0.00039055	-0.00193085		NFKB3	Transcription factor p65 OS=Homo sapiens OX=9606 GN=RELA PE=1 SV=2	0	24.743	14	7	84	7	551	60.2	5.68	31.1	7	0	-0.75009	-0.323493	-0.157558	-0.561118	-0.224098	-0.444753	0.0345783	0.308606	-0.0894089
P07910	HNRNPC	0.666698	2.26551	0.0054261	0.0261076	+	C33A_C93	-0.584896	-5.47229	+	HNRPC	Heterogeneous nuclear ribonucleoproteins C1/C2 OS=Homo sapiens OX=9606 GN=HNRNPC PE=1 SV=4	0	24.741	16	6	350	5	306	33.7	5.08	206.22	6	1	2.7338	2.69296	2.95741	3.43548	3.45969	3.24368	2.79289	2.91568	2.60853
Q86W92	PPFIBP1	0.699339	0.857689	0.138775	0.181013			-0.515935	-1.8451		KIAA1230	Liprin-beta-1 OS=Homo sapiens OX=9606 GN=PPFIBP1 PE=1 SV=2	0	24.734	10	7	47	7	1011	114	5.55	11.68	7	0	-1.42502	-1.75915	-2.03652	-1.52023	-0.802222	-1.35043	-2.32898	-1.65426	-1.69603
Q5T0D9	TPRG1L	1.25648	1.45684	0.0349267	0.0691923			0.32939	3.13765		FAM79A MOVER	Tumor protein p63-regulated gene 1-like protein OS=Homo sapiens OX=9606 GN=TPRG1L PE=1 SV=1	0	24.732	38	7	71	7	272	30.2	7.34	24.74	7	0	-0.522769	-0.394051	-0.631371	-1.00311	-0.7841	-0.749145	-0.163146	-0.546091	-0.620354
Q9NX20	MRPL16	0.782694	1.88546	0.0130179	0.0368872	+	C33A_C93	-0.353479	-4.26344			Large ribosomal subunit protein uL16m OS=Homo sapiens OX=9606 GN=MRPL16 PE=1 SV=1	0	24.719	30	6	101	6	251	28.4	10.13	36.86	6	0	0.893393	0.861941	0.74877	1.32881	1.11978	1.11595	1.23137	1.05291	1.01429
Q9BYG3	NIFK	1.25949	1.45765	0.0348619	0.0691312			0.332842	3.13958		MKI67IP NOPP34	MKI67 FHA domain-interacting nucleolar phosphoprotein OS=Homo sapiens OX=9606 GN=NIFK PE=1 SV=1	0	24.689	21	5	48	5	293	34.2	9.88	14.55	5	0	-1.70904	-1.7856	-1.95319	-2.30419	-2.06776	-2.0744	-2.40243	-1.83481	-2.29332
P51648	ALDH3A2	0.775418	1.9327	0.0116762	0.036751	+	C33A_C93	-0.366954	-4.40164		ALDH10 FALDH	Aldehyde dehydrogenase family 3 member A2 OS=Homo sapiens OX=9606 GN=ALDH3A2 PE=1 SV=1	0	24.617	18	7	109	6	485	54.8	7.88	37.94	7	0	-0.0636542	0.0686333	-0.202483	0.342973	0.31421	0.246176	-0.221027	-0.309865	-0.315306
O94808	GFPT2	2.01325	0.634199	0.232167	0.289448			1.00953	1.40701			Glutamine--fructose-6-phosphate aminotransferase [isomerizing] 2 OS=Homo sapiens OX=9606 GN=GFPT2 PE=1 SV=3	0	24.611	12	7	63	4	682	76.9	7.37	28.08	7	0	-1.74664	-2.13481	-1.69954	-4.27467	-2.08251	-2.25239	-2.0795	-1.98159	-1.83719
P27448	MARK3	1.75379	3.09804	0.000797928	0.0154687	+	C33A_C93	0.810474	9.13188	+	CTAK1 EMK2	MAP/microtubule affinity-regulating kinase 3 OS=Homo sapiens OX=9606 GN=MARK3 PE=1 SV=5	0	24.603	9	7	78	5	753	84.4	9.57	33.17	7	0	-2.14766	-2.01995	-2.31977	-3.00086	-2.93876	-2.97918	-2.19861	-2.31232	-2.07029
Q07021	C1QBP	1.39181	1.16508	0.0683779	0.106374			0.476958	2.47772		GC1QBP HABP1 SF2P32	Complement component 1 Q subcomponent-binding protein, mitochondrial OS=Homo sapiens OX=9606 GN=C1QBP PE=1 SV=1	0	24.595	30	4	106	4	282	31.3	4.84	44.31	4	0	1.42439	1.94515	1.89736	1.08606	1.35306	1.39689	1.4568	2.33599	0.803814
P40938	RFC3	1.35523	0.830046	0.147895	0.190393			0.438543	1.79032			Replication factor C subunit 3 OS=Homo sapiens OX=9606 GN=RFC3 PE=1 SV=2	0	24.584	25	6	76	6	356	40.5	8.34	30.19	6	0	0.179333	0.947754	0.532777	-0.0762921	0.141711	0.278817	0.100792	-0.63092	-0.264236
P62899	RPL31	1.20094	0.714953	0.192773	0.24275			0.264162	1.56439			Large ribosomal subunit protein eL31 OS=Homo sapiens OX=9606 GN=RPL31 PE=1 SV=1	0	24.567	41	6	112	6	125	14.5	10.54	51.85	6	0	3.83763	3.46342	3.48067	3.56179	3.19064	3.2368	3.65979	3.11063	3.71393
O43719	HTATSF1	0.924587	0.0750318	0.841334	0.922412			-0.113118	-0.213561			17S U2 SnRNP complex component HTATSF1 OS=Homo sapiens OX=9606 GN=HTATSF1 PE=1 SV=1	0	24.548	12	7	56	7	755	85.8	4.4	16.15	7	0	-1.90644	-2.14993	-0.950069	-1.321	-2.30399	-1.04209	-1.10779	-0.579673	-0.761576
O43837	IDH3B	1.00172	0.00724326	0.98346	0.991864			0.00247298	0.0220554			Isocitrate dehydrogenase [NAD] subunit beta, mitochondrial OS=Homo sapiens OX=9606 GN=IDH3B PE=1 SV=2	0	24.538	12	5	63	5	385	42.2	8.46	23.63	5	0	0.505251	0.57048	0.857731	0.587977	0.687953	0.650114	0.620359	0.453074	0.20731
Q6IAA8	LAMTOR1	0.820371	1.19901	0.0632393	0.101251			-0.285652	-2.55099		C11orf59 PDRO	Ragulator complex protein LAMTOR1 OS=Homo sapiens OX=9606 GN=LAMTOR1 PE=1 SV=2	0	24.515	31	5	66	5	161	17.7	5.15	29.72	5	0	1.17585	1.16921	1.12256	1.53249	1.22121	1.57088	1.31061	0.789704	1.16732
Q70UQ0	IKBIP	0.143063	3.31656	0.000482432	0.01592	+	C33A_C93	-2.80527	-10.4017	+	IKIP	Inhibitor of nuclear factor kappa-B kinase-interacting protein OS=Homo sapiens OX=9606 GN=IKBIP PE=1 SV=1	0	24.505	23	7	70	7	350	39.3	9.17	22.63	7	0	-2.16841	-1.28201	-1.82908	0.890269	1.13417	1.11188	-2.0951	-3.47984	-2.20199
Q12805	EFEMP1	0.944816	0.153444	0.702354	0.814961			-0.0818941	-0.41068		FBLN3 FBNL	EGF-containing fibulin-like extracellular matrix protein 1 OS=Homo sapiens OX=9606 GN=EFEMP1 PE=1 SV=2	0	24.503	14	5	192	5	493	54.6	5.07	96.47	5	0	1.90019	1.64815	2.06917	1.64159	2.07892	2.14269	2.68756	3.0003	2.4544
[truncated: 1,685 more rows]

## Sheet: FC>1.5, FDR<0.05
Protein ID	Gene Names (primary)	Fold_Change C33A_C93	-Log Student's T-test p-value C33A_C93	p value	Student's T-test q-value C33A_C93	Student's T-test Significant C33A_C93	Student's T-test significant	Student's T-test Difference C33A_C93	Student's T-test Test statistic C33A_C93	Significant，FDR<0.05, S0=0.1	Gene Names (synonym)	Description	Exp. q-value: Combined	Sum PEP Score	Coverage [%]	# Peptides	# PSMs	# Unique Peptides	# AAs	MW [kDa]	calc. pI	Score CHIMERYS Identification: CHIMERYS Identification	# Peptides (by Search Engine): CHIMERYS Identification	# Razor Peptides	Abundance: C33A_1	Abundance: C33A_2	Abundance: C33A_3	Abundance: C93_1	Abundance: C93_2	Abundance: C93_3	Abundance: C-IgG_1	Abundance: C-IgG_2	Abundance: C-IgG_3
[truncated: 345 more rows]

[truncated: 1 more sheets: FC>1.5, p<0.05]
